# Supplementary material for: Sensory input-dependent gain modulation of the optokinetic nystagmus by mid-infrared stimulation in pigeons
Source: eLife. 2023 Feb 28;12:e78729. doi: 10.7554/eLife.78729 (PMC9977280; doi:10.7554/eLife.78729)
Supplement: Figure 1—source data 1. [file elife-78729-fig1-data1.xlsx]

## Sheet: Fig1B
	TN			NT
	EOG (deg)	Spikes (V)		EOG (deg)	Spikes (V)
	4.11079	0.247192		0.305313	0.189209
	4.1111	0.228882		0.305343	0.205994
	4.11139	0.216675		0.305373	0.209045
	4.11167	0.164795		0.305404	0.20752
	4.11192	0.152588		0.305435	0.183105
	4.11215	0.17395		0.305467	0.154114
	4.11236	0.161743		0.305499	0.138855
	4.11255	0.167847		0.305532	0.15564
	4.11272	0.164795		0.305566	0.163269
	4.11286	0.152588		0.3056	0.164795
	4.11298	0.143433		0.305635	0.17395
	4.11308	0.123596		0.30567	0.151062
	4.11315	0.119019		0.305706	0.160217
	4.11319	0.135803		0.305743	0.138855
	4.11321	0.141907		0.30578	0.137329
	4.1132	0.14801		0.305817	0.163269
	4.11316	0.163269		0.305856	0.187683
	4.1131	0.180054		0.305894	0.210571
	4.113	0.183105		0.305934	0.189209
	4.11288	0.172424		0.305974	0.15564
	4.11272	0.189209		0.306014	0.17395
	4.11254	0.183105		0.306055	0.172424
	4.11232	0.186157		0.306097	0.138855
	4.11207	0.166321		0.306139	0.0976562
	4.11179	0.1297		0.306182	0.111389
	4.11148	0.131226		0.306225	0.126648
	4.11113	0.140381		0.306269	0.143433
	4.11075	0.138855		0.306314	0.18158
	4.11033	0.144958		0.306359	0.187683
	4.10987	0.154114		0.306405	0.175476
	4.10939	0.169373		0.306451	0.18158
	4.10886	0.154114		0.306498	0.215149
	4.1083	0.131226		0.306545	0.268555
	4.1077	0.144958		0.306593	0.405884
	4.10706	0.160217		0.306641	0.656128
	4.10638	0.164795		0.30669	1.02234
	4.10567	0.169373		0.306739	1.86157
	4.10491	0.195312		0.306789	3.16772
	4.10412	0.221252		0.30684	3.57971
	4.10328	0.20752		0.306891	2.54517
	4.10241	0.169373		0.306942	0.718689
	4.10149	0.152588		0.306994	-0.900269
	4.10052	0.143433		0.307046	-1.87073
	4.09952	0.161743		0.307099	-2.19727
	4.09847	0.189209		0.307152	-2.08282
	4.09738	0.242615		0.307206	-1.78223
	4.09624	0.238037		0.30726	-1.44043
	4.09506	0.19989		0.307314	-1.12457
	4.09383	0.189209		0.307369	-0.845337
	4.09256	0.204468		0.307424	-0.642395
	4.09124	0.186157		0.30748	-0.468445
	4.08987	0.140381		0.307536	-0.299072
	4.08845	0.120544		0.307592	-0.184631
	4.08698	0.0869751		0.307649	-0.111389
	4.08547	0.0900269		0.307706	-0.0427246
	4.0839	0.0854492		0.307763	0.0167847
	4.08228	0.111389		0.307821	0.0900269
	4.08061	0.0946045		0.307879	0.161743
	4.07889	0.114441		0.307937	0.201416
	4.07711	0.151062		0.307996	0.215149
	4.07528	0.158691		0.308055	0.241089
	4.0734	0.187683		0.308114	0.260925
	4.07146	0.215149		0.308173	0.280762
	4.06946	0.215149		0.308232	0.282288
	4.0674	0.219727		0.308292	0.311279
	4.06529	0.222778		0.308352	0.335693
	4.06312	0.238037		0.308412	0.334167
	4.06089	0.224304		0.308472	0.343323
	4.0586	0.224304		0.308533	0.344849
	4.05625	0.234985		0.308593	0.367737
	4.05383	0.276184		0.308654	0.360107
	4.05135	0.306702		0.308715	0.314331
	4.04881	0.311279		0.308776	0.289917
	4.0462	0.292969		0.308837	0.279236
	4.04353	0.260925		0.308898	0.268555
	4.04079	0.257874		0.308959	0.254822
	4.03798	0.244141		0.309021	0.274658
	4.0351	0.215149		0.309082	0.265503
	4.03215	0.227356		0.309144	0.273132
	4.02912	0.219727		0.309206	0.279236
	4.02603	0.198364		0.309267	0.250244
	4.02286	0.198364		0.309329	0.268555
	4.01962	0.202942		0.309391	0.27771
	4.0163	0.222778		0.309453	0.270081
	4.0129	0.222778		0.309515	0.265503
	4.00943	0.216675		0.309576	0.219727
	4.00587	0.22583		0.309638	0.178528
	4.00224	0.218201		0.3097	0.167847
	3.99852	0.219727		0.309762	0.167847
	3.99472	0.19989		0.309824	0.158691
	3.99084	0.19989		0.309886	0.169373
	3.98687	0.187683		0.309948	0.183105
	3.98281	0.198364		0.31001	0.166321
	3.97867	0.187683		0.310071	0.149536
	3.97444	0.184631		0.310133	0.143433
	3.97011	0.178528		0.310195	0.140381
	3.9657	0.184631		0.310256	0.158691
	3.96119	0.193787		0.310318	0.154114
	3.95659	0.215149		0.310379	0.149536
	3.95189	0.236511		0.310441	0.141907
	3.9471	0.250244		0.310502	0.151062
	3.9422	0.279236		0.310564	0.164795
	3.93721	0.276184		0.310625	0.169373
	3.93212	0.25177		0.310686	0.178528
	3.92692	0.222778		0.310747	0.154114
	3.92162	0.204468		0.310808	0.151062
	3.91621	0.175476		0.310869	0.154114
	3.9107	0.160217		0.310929	0.123596
	3.90508	0.152588		0.31099	0.119019
	3.89935	0.1297		0.311051	0.125122
	3.89351	0.1297		0.311111	0.131226
	3.88756	0.137329		0.311172	0.115967
	3.88149	0.125122		0.311232	0.117493
	3.87531	0.0991821		0.311292	0.14801
	3.86901	0.106812		0.311352	0.160217
	3.86259	0.128174		0.311412	0.183105
	3.85605	0.138855		0.311472	0.161743
	3.84939	0.134277		0.311532	0.146484
	3.84261	0.14801		0.311591	0.131226
	3.83571	0.161743		0.311651	0.125122
	3.82868	0.161743		0.31171	0.141907
	3.82152	0.123596		0.31177	0.164795
	3.81423	0.102234		0.311829	0.18158
	3.80681	0.10376		0.311889	0.196838
	3.79926	0.10376		0.311948	0.184631
	3.79158	0.0991821		0.312007	0.164795
	3.78376	0.0778198		0.312066	0.187683
	3.77581	0.0717163		0.312125	0.177002
	3.76772	0.0534058		0.312184	0.187683
	3.75948	0.0793457		0.312243	0.196838
	3.75111	0.12207		0.312302	0.195312
	3.7426	0.1297		0.312362	0.189209
	3.73393	0.177002		0.312421	0.186157
	3.72513	0.20752		0.31248	0.170898
	3.71617	0.201416		0.312539	0.175476
	3.70707	0.196838		0.312598	0.180054
	3.69782	0.167847		0.312657	0.192261
	3.68841	0.160217		0.312716	0.161743
	3.67885	0.178528		0.312775	0.154114
	3.66913	0.189209		0.312834	0.161743
	3.65926	0.166321		0.312894	0.158691
	3.64923	0.177002		0.312953	0.163269
	3.63904	0.152588		0.313013	0.158691
	3.62868	0.15564		0.313072	0.146484
	3.61817	0.196838		0.313132	0.126648
	3.60748	0.230408		0.313192	0.143433
	3.59663	0.230408		0.313252	0.17395
	3.58561	0.20752		0.313312	0.201416
	3.57443	0.184631		0.313372	0.19989
	3.56307	0.186157		0.313432	0.17395
	3.55153	0.190735		0.313493	0.175476
	3.53982	0.19989		0.313554	0.202942
	3.52794	0.204468		0.313615	0.202942
	3.51588	0.19989		0.313676	0.204468
	3.50363	0.175476		0.313737	0.193787
	3.49121	0.164795		0.313799	0.190735
	3.47861	0.177002		0.313861	0.190735
	3.46582	0.183105		0.313923	0.178528
	3.45284	0.193787		0.313985	0.17395
	3.43968	0.180054		0.314048	0.160217
	3.42633	0.132751		0.314111	0.167847
	3.41279	0.109863		0.314174	0.212097
	3.39905	0.112915		0.314238	0.242615
	3.38513	0.143433		0.314302	0.241089
	3.37101	0.128174		0.314366	0.22583
	3.35669	0.128174		0.314431	0.213623
	3.34218	0.138855		0.314496	0.201416
	3.32747	0.120544		0.314561	0.193787
	3.31255	0.126648		0.314627	0.189209
	3.29744	0.166321		0.314694	0.177002
	3.28212	0.167847		0.31476	0.205994
	3.2666	0.161743		0.314828	0.210571
	3.25087	0.177002		0.314896	0.192261
	3.23493	0.186157		0.314964	0.187683
	3.21878	0.183105		0.315033	0.192261
	3.20242	0.184631		0.315102	0.189209
	3.18585	0.163269		0.315172	0.189209
	3.16906	0.160217		0.315242	0.205994
	3.15206	0.141907		0.315314	0.213623
	3.13484	0.125122		0.315385	0.230408
	3.11741	0.108337		0.315458	0.22583
	3.09975	0.102234		0.315531	0.222778
	3.08187	0.112915		0.315604	0.248718
	3.06377	0.112915		0.315679	0.267029
	3.04544	0.0930786		0.315754	0.283813
	3.02689	0.0869751		0.31583	0.267029
	3.00812	0.0869751		0.315907	0.254822
	2.98911	0.0762939		0.315984	0.283813
	2.96987	0.0991821		0.316062	0.267029
	2.9504	0.109863		0.316141	0.262451
	2.9307	0.117493		0.316221	0.253296
	2.91077	0.125122		0.316302	0.256348
	2.8906	0.114441		0.316383	0.245666
	2.87019	0.111389		0.316466	0.253296
	2.84954	0.0778198		0.316549	0.231934
	2.82865	0.0946045		0.316634	0.231934
	2.80753	0.10376		0.316719	0.228882
	2.78616	0.088501		0.316805	0.25177
	2.76454	0.0747681		0.316892	0.244141
	2.74269	0.0686645		0.316981	0.231934
	2.72058	0.0976562		0.31707	0.224304
	2.69823	0.112915		0.31716	0.222778
	2.67563	0.0900269		0.317252	0.239563
	2.65278	0.0930786		0.317344	0.253296
	2.62967	0.0915527		0.317438	0.263977
	2.60632	0.0854492		0.317532	0.25177
	2.58271	0.088501		0.317628	0.236511
	3.25834	0.106812		0.317725	0.222778
	3.28774	0.114441		0.317824	0.212097
	3.31803	0.154114		0.317923	0.169373
	3.34853	0.143433		0.318024	0.152588
	3.37868	0.105286		0.318126	0.167847
	3.40802	0.0961304		0.318229	0.189209
	3.43615	0.108337		0.318333	0.209045
	3.46277	0.106812		0.318439	0.215149
	3.48776	0.120544		0.318546	0.160217
	3.51119	0.135803		0.318655	0.154114
	3.53328	0.193787		0.318764	0.160217
	3.55438	0.190735		0.318876	0.172424
	3.57487	0.20752		0.318988	0.202942
	3.59507	0.221252		0.319102	0.190735
	3.61509	0.212097		0.319218	0.172424
	3.63469	0.167847		0.319335	0.161743
	3.65332	0.161743		0.319453	0.157166
	3.67025	0.167847		0.319573	0.167847
	3.68474	0.17395		0.319694	0.152588
	3.69621	0.192261		0.319817	0.154114
	3.70423	0.210571		0.319942	0.149536
	3.70854	0.215149		0.320068	0.1297
	3.70906	0.215149		0.320196	0.135803
	3.70589	0.218201		0.320325	0.123596
	3.69925	0.22583		0.320456	0.140381
	3.68949	0.224304		0.320589	0.149536
	3.67702	0.228882		0.320723	0.14801
	3.66221	0.219727		0.32086	0.149536
	3.64535	0.212097		0.320997	0.163269
	3.62653	0.210571		0.321137	0.172424
	3.60572	0.204468		0.321279	0.167847
	3.58282	0.221252		0.321422	0.166321
	3.55779	0.218201		0.321567	0.17395
	3.53065	0.215149		0.321714	0.178528
	3.50151	0.231934		0.321862	0.169373
	3.47058	0.239563		0.322013	0.183105
	3.43817	0.202942		0.322166	0.209045
	3.40476	0.158691		0.32232	0.189209
	3.37091	0.140381		0.322476	0.172424
	3.3373	0.126648		0.322635	0.154114
	3.30465	0.14801		0.322795	0.128174
	3.27369	0.186157		0.322958	0.115967
	3.24497	0.192261		0.323122	0.131226
	3.21873	0.144958		0.323289	0.146484
	3.19488	0.135803		0.323457	0.163269
	3.17301	0.138855		0.323628	0.18158
	3.15257	0.102234		0.323801	0.161743
	3.13289	0.0915527		0.323976	0.141907
	3.11324	0.154114		0.324153	0.108337
	3.09294	0.178528		0.324332	0.131226
	3.07143	0.192261		0.324514	0.135803
	3.04831	0.158691		0.324698	0.12207
	3.02331	0.157166		0.324884	0.135803
	2.99628	0.180054		0.325073	0.149536
	2.96718	0.20752		0.325264	0.164795
	2.93608	0.198364		0.325457	0.172424
	2.9031	0.186157		0.325652	0.172424
	2.8683	0.154114		0.32585	0.164795
	2.83164	0.108337		0.326051	0.14801
	2.79307	0.112915		0.326253	0.149536
	2.75258	0.164795		0.326459	0.163269
	2.71014	0.177002		0.326667	0.152588
	2.66557	0.177002		0.326877	0.143433
	2.61852	0.161743		0.32709	0.151062
	2.56856	0.157166		0.327306	0.170898
	2.51528	0.157166		0.327524	0.164795
	2.45839	0.151062		0.327745	0.175476
	2.39773	0.164795		0.327969	0.163269
	2.33319	0.175476		0.328195	0.170898
	2.26462	0.210571		0.328424	0.170898
	2.1918	0.210571		0.328656	0.18158
	2.11445	0.231934		0.328891	0.180054
	2.03235	0.222778		0.329129	0.196838
	1.94535	0.169373		0.32937	0.201416
	1.85349	0.144958		0.329613	0.189209
	1.75696	0.144958		0.32986	0.170898
	1.65618	0.140381		0.33011	0.166321
	1.55183	0.137329		0.330362	0.17395
	1.44475	0.149536		0.330618	0.151062
	1.33579	0.119019		0.330877	0.1297
	1.22566	0.0900269		0.331139	0.164795
	1.11485	0.0762939		0.331405	0.18158
	1.00369	0.0717163		0.331673	0.190735
	0.89236	0.0823975		0.331945	0.198364
	0.780876	0.112915		0.332221	0.14801
	0.669009	0.0991821		0.332499	0.137329
	0.556302	0.0747681		0.332781	0.134277
	0.442203	0.0289917		0.333067	0.157166
	0.326215	0.0320435		0.333356	0.178528
	0.207926	0.0778198		0.333649	0.183105
	0.0870186	0.106812		0.333945	0.160217
	-0.0366551	0.112915		0.334245	0.132751
	-0.163005	0.0976562		0.334549	0.146484
	-0.291762	0.0915527		0.334856	0.137329
	-0.422606	0.119019		0.335167	0.119019
	-0.55522	0.138855		0.335482	0.126648
	-0.689255	0.132751		0.335801	0.111389
	-0.824274	0.144958		0.336124	0.151062
	-0.959734	0.17395		0.33645	0.138855
	-1.09503	0.160217		0.336781	0.140381
	-1.22953	0.146484		0.337116	0.134277
	-1.36256	0.106812		0.337455	0.112915
	-1.49341	0.12207		0.337798	0.112915
	-1.6213	0.115967		0.338145	0.0808716
	-1.74539	0.0930786		0.338496	0.0671387
	-1.8649	0.0900269		0.338852	0.0900269
	-1.97907	0.108337		0.339212	0.131226
	-2.08722	0.125122		0.339577	0.119019
	-2.18877	0.114441		0.339946	0.132751
	-2.28322	0.14801		0.340319	0.137329
	-2.37027	0.178528		0.340697	0.125122
	-2.44969	0.163269		0.34108	0.12207
	-2.52137	0.160217		0.341467	0.0976562
	-2.58525	0.135803		0.341859	0.0778198
	-2.64134	0.111389		0.342256	0.0854492
	-2.68978	0.0900269		0.342658	0.0991821
	-2.73081	0.0762939		0.343064	0.117493
	-2.76475	0.0518799		0.343475	0.128174
	-2.79202	0.0656128		0.343892	0.126648
	-2.81303	0.0854492		0.344313	0.131226
	-2.8282	0.0915527		0.34474	0.114441
	-2.83799	0.0701904		0.345171	0.106812
	-2.84288	0.0869751		0.345608	0.0839233
	-2.84341	0.088501		0.34605	0.0762939
	-2.84017	0.112915		0.346498	0.0778198
	-2.8338	0.120544		0.346951	0.0717163
	-2.82503	0.114441		0.347409	0.0778198
	-2.81461	0.126648		0.347872	0.0946045
	-2.80318	0.151062		0.348342	0.141907
	-2.79133	0.152588		0.348816	0.154114
	-2.77958	0.158691		0.349297	0.149536
	-2.76846	0.160217		0.349783	0.14801
	-2.75842	0.169373		0.350275	0.146484
	-2.74987	0.195312		0.350773	0.166321
	-2.74313	0.169373		0.351276	0.195312
	-2.73849	0.152588		0.351785	0.204468
	-2.73628	0.164795		0.352301	0.187683
	-2.73683	0.184631		0.352822	0.180054
	-2.7405	0.180054		0.35335	0.175476
	-2.74757	0.178528		0.353883	0.195312
	-2.75827	0.178528		0.354423	0.20752
	-2.77281	0.180054		0.354969	0.19989
	-2.79155	0.164795		0.355521	0.205994
	-2.81505	0.187683		0.35608	0.216675
	-2.844	0.195312		0.356645	0.231934
	-2.87914	0.177002		0.357217	0.227356
	-2.92111	0.152588		0.357795	0.213623
	-2.97037	0.131226		0.358379	0.20752
	-3.02718	0.134277		0.35897	0.20752
	-3.09159	0.175476		0.359568	0.210571
	-3.16339	0.213623		0.360172	0.209045
	-3.24218	0.230408		0.360784	0.221252
	-3.32739	0.227356		0.361402	0.22583
	-3.41835	0.187683		0.362026	0.216675
	-3.51434	0.177002		0.362658	0.209045
	-3.61463	0.193787		0.363297	0.192261
	-3.71855	0.172424		0.363943	0.204468
	-3.8256	0.169373		0.364595	0.224304
	-3.93538	0.18158		0.365255	0.22583
	-4.04764	0.180054		0.365922	0.202942
	-4.1622	0.160217		0.366597	0.164795
	-4.279	0.146484		0.367278	0.169373
	-4.39804	0.143433		0.367967	0.184631
	-4.51942	0.14801		0.368663	0.184631
	-4.64325	0.175476		0.369367	0.17395
	-4.76956	0.20752		0.370078	0.190735
	-4.8982	0.215149		0.370796	0.210571
	-5.02889	0.20752		0.371522	0.239563
	-5.16117	0.210571		0.372256	0.22583
	-5.29451	0.189209		0.372997	0.212097
	-5.42829	0.170898		0.373746	0.202942
	-5.5618	0.196838		0.374503	0.209045
	-5.69429	0.209045		0.375267	0.18158
	-5.82511	0.198364		0.376039	0.167847
	-5.95373	0.196838		0.37682	0.149536
	-6.07978	0.190735		0.377608	0.160217
	-6.20305	0.201416		0.378404	0.167847
	-6.32339	0.204468		0.379208	0.144958
	-6.44075	0.201416		0.38002	0.135803
	-6.55507	0.216675		0.380841	0.132751
	-6.66634	0.19989		0.381669	0.123596
	-6.77455	0.198364		0.382506	0.120544
	-6.87967	0.193787		0.383351	0.137329
	-6.98158	0.204468		0.384204	0.1297
	-7.0801	0.228882		0.385066	0.128174
	-7.17496	0.210571		0.385935	0.143433
	-7.26574	0.198364		0.386814	0.169373
	-7.35192	0.177002		0.387701	0.180054
	-7.43287	0.198364		0.388596	0.164795
	-7.50798	0.204468		0.3895	0.152588
	-7.57662	0.205994		0.390412	0.146484
	-7.63831	0.18158		0.391334	0.14801
	-7.69277	0.17395		0.392264	0.183105
	-7.73991	0.164795		0.393202	0.17395
	-7.77993	0.15564		0.39415	0.172424
	-7.81313	0.160217		0.395106	0.183105
	-7.8399	0.177002		0.396071	0.17395
	-7.86063	0.175476		0.397045	0.167847
	-7.8757	0.163269		0.398028	0.177002
	-7.88541	0.161743		0.39902	0.18158
	-7.88998	0.169373		0.400021	0.161743
	-7.88948	0.20752		0.401031	0.152588
	-7.88386	0.17395		0.40205	0.152588
	-7.87297	0.0900269		0.403079	0.140381
	-7.85662	0.0549316		0.404117	0.12207
	-7.83471	0.0762939		0.405163	0.0854492
	-7.80729	0.0991821		0.40622	0.0473023
	-7.77458	0.14801		0.407285	0.0701904
	-7.737	0.18158		0.40836	0.102234
	-7.69514	0.184631		0.409445	0.114441
	-7.64978	0.209045		0.410539	0.125122
	-7.60185	0.256348		0.411642	0.137329
	-7.55235	0.259399		0.412755	0.115967
	-7.50236	0.234985		0.413878	0.114441
	-7.45304	0.230408		0.41501	0.132751
	-7.40562	0.241089		0.416152	0.143433
	-7.36134	0.250244		0.417304	0.166321
	-7.32139	0.273132		0.418466	0.151062
	-7.28699	0.254822		0.419637	0.132751
	-7.25931	0.257874		0.420818	0.114441
	-7.2395	0.271606		0.42201	0.111389
	-7.2286	0.267029		0.423211	0.126648
	-7.22751	0.268555		0.424422	0.12207
	-7.2371	0.274658		0.425643	0.115967
	-7.25808	0.273132		0.426875	0.0778198
	-7.29102	0.267029		0.428116	0.062561
	-7.33626	0.234985		0.429368	0.0442505
	-7.39388	0.205994		0.43063	0.0488281
	-7.46375	0.202942		0.431902	0.0564575
	-7.54563	0.20752		0.433184	0.0762939
	-7.63906	0.216675		0.434477	0.0839233
	-7.74338	0.221252		0.43578	0.0930786
	-7.85771	0.224304		0.437094	0.109863
	-7.98097	0.213623		0.438418	0.10376
	-8.11192	0.17395		0.439752	0.111389
	-8.24928	0.143433		0.441097	0.12207
	-8.39176	0.170898		0.442453	0.152588
	-8.53817	0.184631		0.443819	0.143433
	-8.6875	0.152588		0.445196	0.112915
	-8.83892	0.146484		0.446583	0.115967
	-8.9919	0.184631		0.447982	0.12207
	-9.14608	0.192261		0.44939	0.123596
	-9.30135	0.149536		0.45081	0.119019
	-9.4578	0.128174		0.452241	0.123596
	-9.61569	0.114441		0.453682	0.137329
	-9.7754	0.115967		0.455135	0.131226
	-9.93722	0.125122		0.456598	0.115967
	-10.1011	0.137329		0.458072	0.109863
	-10.2668	0.172424		0.459557	0.114441
	-10.4335	0.198364		0.461053	0.111389
	-10.6003	0.209045		0.462561	0.144958
	-10.7661	0.216675		0.464079	0.166321
	-10.9297	0.204468		0.465609	0.190735
	-11.0898	0.198364		0.467149	0.196838
	-11.2452	0.190735		0.468701	0.183105
	-11.3948	0.157166		0.470264	0.18158
	-11.5376	0.151062		0.471838	0.195312
	-11.6729	0.178528		0.473424	0.189209
	-11.8001	0.19989		0.475021	0.169373
	-11.9187	0.186157		0.476629	0.18158
	-12.0281	0.149536		0.478249	0.17395
	-12.1283	0.132751		0.479879	0.151062
	-12.2192	0.135803		0.481522	0.160217
	-12.3009	0.138855		0.483176	0.205994
	-12.3736	0.154114		0.484841	0.193787
	-12.4378	0.166321		0.486518	0.190735
	-12.4937	0.144958		0.488207	0.184631
	-12.5416	0.115967		0.489907	0.218201
	-12.5817	0.0671387		0.491618	0.212097
	-12.6143	0.0854492		0.493342	0.192261
	-12.6396	0.12207		0.495077	0.204468
	-12.6576	0.1297		0.496824	0.22583
	-12.6688	0.137329		0.498582	0.248718
	-12.6735	0.151062		0.500352	0.221252
	-12.6718	0.1297		0.502134	0.209045
	-12.6639	0.140381		0.503929	0.201416
	-12.65	0.146484		0.505734	0.216675
	-12.6303	0.138855		0.507552	0.218201
	-12.6048	0.140381		0.509382	0.224304
	-12.5739	0.1297		0.511224	0.219727
	-12.5377	0.138855		0.513077	0.190735
	-12.4964	0.149536		0.514943	0.149536
	-12.4502	0.135803		0.516821	0.138855
	-12.3991	0.120544		0.51871	0.146484
	-12.3432	0.088501		0.520612	0.18158
	-12.2824	0.0900269		0.522527	0.178528
	-12.2167	0.141907		0.524453	0.184631
	-12.146	0.19989		0.526391	0.184631
	-12.0704	0.227356		0.528342	0.163269
	-11.99	0.193787		0.530305	0.184631
	-11.9051	0.189209		0.53228	0.19989
	-11.8164	0.202942		0.534268	0.189209
	-11.7248	0.202942		0.536268	0.143433
	-11.6312	0.164795		0.53828	0.125122
	-11.5369	0.140381		0.540305	0.120544
	-11.4435	0.160217		0.542342	0.117493
	-11.3522	0.180054		0.544392	0.117493
	-11.2642	0.18158		0.546454	0.140381
	-11.1808	0.210571		0.548529	0.14801
	-11.1027	0.193787		0.550617	0.1297
	-11.0307	0.115967		0.552717	0.132751
	-10.9654	0.0518799		0.554829	0.141907
	-10.9073	0.0167847		0.556955	0.140381
	-10.8569	0.0595093		0.559093	0.123596
	-10.8147	0.100708		0.561243	0.119019
	-10.7812	0.140381		0.563407	0.140381
	-10.7565	0.144958		0.565583	0.14801
	-10.7409	0.15564		0.567773	0.143433
	-10.7343	0.154114		0.569975	0.143433
	-10.7364	0.152588		0.572189	0.135803
	-10.7469	0.125122		0.574417	0.131226
	-10.7652	0.149536		0.576658	0.140381
	-10.7908	0.175476		0.578912	0.135803
	-10.8232	0.164795		0.581179	0.112915
	-10.862	0.157166		0.583459	0.135803
	-10.9067	0.163269		0.585751	0.169373
	-10.9572	0.183105		0.588058	0.161743
	-11.0131	0.184631		0.590377	0.154114
	-11.0741	0.169373		0.592709	0.152588
	-11.1396	0.154114		0.595055	0.164795
	-11.2095	0.175476		0.597414	0.166321
	-11.2834	0.192261		0.599786	0.164795
	-11.3611	0.205994		0.602172	0.166321
	-11.4427	0.19989		0.604571	0.14801
	-11.5282	0.18158		0.606983	0.134277
	-11.6178	0.196838		0.609409	0.158691
	-11.7117	0.189209		0.611848	0.190735
	-11.8104	0.186157		0.614301	0.222778
	-11.914	0.164795		0.616767	0.216675
	-12.0229	0.143433		0.619247	0.215149
	-12.1371	0.158691		0.62174	0.213623
	-12.2567	0.186157		0.624247	0.204468
	-12.3812	0.177002		0.626767	0.170898
	-12.5103	0.170898		0.629302	0.166321
	-12.6431	0.190735		0.63185	0.175476
	-12.7784	0.184631		0.634411	0.18158
	-12.9154	0.140381		0.636987	0.167847
	-13.053	0.17395		0.639576	0.190735
	-13.1904	0.19989		0.642179	0.160217
	-13.327	0.204468		0.644796	0.135803
	-13.462	0.190735		0.647427	0.132751
	-13.595	0.184631		0.650072	0.138855
	-13.7253	0.192261		0.652731	0.158691
	-13.8527	0.196838		0.655404	0.152588
	-13.9768	0.204468		0.65809	0.160217
	-14.0973	0.205994		0.660791	0.169373
	-14.2139	0.212097		0.663506	0.193787
	-14.3262	0.192261		0.666236	0.209045
	-14.434	0.170898		0.668979	0.205994
	-14.5369	0.12207		0.671736	0.193787
	-14.6346	0.0854492		0.674508	0.161743
	-14.7268	0.109863		0.677294	0.160217
	-14.813	0.164795		0.680094	0.166321
	-14.8929	0.190735		0.682908	0.141907
	-14.9661	0.210571		0.685737	0.141907
	-15.0325	0.212097		0.68858	0.175476
	-15.0918	0.216675		0.691438	0.204468
	-15.1438	0.19989		0.69431	0.216675
	-15.1883	0.216675		0.697196	0.216675
	-15.2249	0.241089		0.700097	0.20752
	-15.2536	0.22583		0.703013	0.215149
	-15.274	0.224304		0.705943	0.189209
	-15.286	0.234985		0.708887	0.160217
	-15.2894	0.260925		0.711846	0.177002
	-15.2841	0.270081		0.71482	0.177002
	-15.2702	0.262451		0.717809	0.160217
	-15.2477	0.253296		0.720812	0.138855
	-15.2168	0.231934		0.72383	0.134277
	-15.1773	0.231934		0.726862	0.128174
	-15.1293	0.213623		0.72991	0.106812
	-15.073	0.210571		0.732972	0.0991821
	-15.0086	0.198364		0.736049	0.115967
	-14.9365	0.205994		0.739141	0.128174
	-14.8574	0.227356		0.742248	0.132751
	-14.7723	0.247192		0.745369	0.140381
	-14.6824	0.260925		0.748506	0.146484
	-14.5888	0.259399		0.751658	0.161743
	-14.493	0.241089		0.754824	0.132751
	-14.3963	0.242615		0.758006	0.132751
	-14.2997	0.247192		0.761203	0.109863
	-14.2046	0.228882		0.764414	0.100708
	-14.1119	0.195312		0.767641	0.114441
	-14.0226	0.216675		0.770883	0.12207
	-13.9375	0.198364		0.77414	0.128174
	-13.8572	0.184631		0.777413	0.126648
	-13.7827	0.170898		0.7807	0.125122
	-13.7144	0.190735		0.784003	0.125122
	-13.653	0.183105		0.78732	0.120544
	-13.599	0.17395		0.790654	0.10376
	-13.5527	0.180054		0.794002	0.0793457
	-13.5145	0.193787		0.797365	0.10376
	-13.4843	0.205994		0.800744	0.1297
	-13.4624	0.198364		0.804138	0.117493
	-13.449	0.193787		0.807548	0.134277
	-13.4441	0.19989		0.810973	0.128174
	-13.4481	0.19989		0.814413	0.123596
	-13.461	0.172424		0.817869	0.131226
	-13.4826	0.151062		0.821339	0.112915
	-13.5127	0.149536		0.824826	0.114441
	-13.5509	0.158691		0.828327	0.151062
	-13.5966	0.154114		0.831845	0.169373
	-13.6492	0.151062		0.835377	0.154114
	-13.7081	0.137329		0.838925	0.126648
	-13.7724	0.158691		0.842489	0.14801
	-13.8417	0.154114		0.846067	0.169373
	-13.9153	0.0915527		0.849662	0.15564
	-13.9925	0.062561		0.853272	0.144958
	-14.0727	0.0396729		0.856897	0.146484
	-14.1554	0.0671387		0.860538	0.177002
	-14.2401	0.0961304		0.864194	0.189209
	-14.3266	0.146484		0.867866	0.187683
	-14.4148	0.170898		0.871553	0.178528
	-14.505	0.161743		0.875256	0.195312
	-14.5975	0.166321		0.878974	0.17395
	-14.693	0.152588		0.882708	0.157166
	-14.7923	0.14801		0.886458	0.160217
	-14.896	0.144958		0.890223	0.146484
	-15.0047	0.143433		0.894003	0.141907
	-15.1189	0.141907		0.8978	0.184631
	-15.2386	0.146484		0.901611	0.183105
	-15.3635	0.126648		0.905439	0.154114
	-15.4931	0.132751		0.909282	0.144958
	-15.6263	0.149536		0.91314	0.157166
	-15.7622	0.166321		0.917014	0.189209
	-15.8994	0.163269		0.920904	0.19989
	-16.0368	0.164795		0.924809	0.20752
	-16.1731	0.157166		0.92873	0.222778
	-16.3072	0.1297		0.932667	0.242615
	-16.4381	0.126648		0.936619	0.228882
	-16.5649	0.186157		0.940587	0.210571
	-16.6868	0.212097		0.94457	0.175476
	-16.8032	0.152588		0.948569	0.160217
	-16.9135	0.131226		0.952584	0.169373
	-17.0172	0.163269		0.956614	0.175476
	-17.1139	0.175476		0.96066	0.178528
	-17.2035	0.144958		0.964722	0.198364
	-17.2858	0.141907		0.968799	0.196838
	-17.3609	0.15564		0.972892	0.18158
	-17.4288	0.170898		0.977001	0.170898
	-17.4896	0.189209		0.981125	0.149536
	-17.5437	0.189209		0.985265	0.146484
	-17.5914	0.209045		0.989421	0.161743
	-17.6331	0.216675		0.993592	0.175476
	-17.6693	0.202942		0.997779	0.144958
	-17.7005	0.177002		1.00198	0.149536
	-17.7272	0.195312		1.0062	0.189209
	-17.7496	0.215149		1.01043	0.190735
	-17.7681	0.227356		1.01468	0.187683
	-17.7829	0.219727		1.01895	0.183105
	-17.7938	0.17395		1.02323	0.166321
	-17.8007	0.137329		1.02753	0.17395
	-17.8033	0.112915		1.03184	0.187683
	-17.8012	0.115967		1.03617	0.183105
	-17.7936	0.123596		1.04051	0.186157
	-17.78	0.152588		1.04487	0.189209
	-17.7597	0.161743		1.04924	0.19989
	-17.7321	0.169373		1.05364	0.218201
	-17.6964	0.178528		1.05804	0.248718
	-17.6521	0.196838		1.06246	0.228882
	-17.5986	0.205994		1.0669	0.234985
	-17.5355	0.190735		1.07136	0.233459
	-17.4628	0.163269		1.07582	0.222778
	-17.3807	0.160217		1.08031	0.227356
	-17.2897	0.172424		1.08481	0.259399
	-17.1904	0.19989		1.08933	0.268555
	-17.0838	0.205994		1.09386	0.250244
	-16.971	0.222778		1.09841	0.231934
	-16.8533	0.218201		1.10297	0.189209
	-16.7318	0.212097		1.10755	0.14801
	-16.608	0.195312		1.11214	0.161743
	-16.483	0.180054		1.11676	0.210571
	-16.3581	0.18158		1.12138	0.250244
	-16.2344	0.170898		1.12602	0.260925
	-16.1128	0.123596		1.13068	0.282288
	-15.9943	0.1297		1.13536	0.268555
	-15.8798	0.135803		1.14005	0.257874
	-15.7699	0.154114		1.14475	0.268555
	-15.6655	0.163269		1.14947	0.296021
	-15.5675	0.143433		1.15421	0.265503
	-15.4766	0.158691		1.15896	0.219727
	-15.3936	0.169373		1.16373	0.218201
	-15.3194	0.134277		1.16851	0.234985
	-15.2544	0.0808716		1.17331	0.25177
	-15.1991	0.0686645		1.17813	0.256348
	-15.1537	0.0640869		1.18296	0.257874
	-15.1183	0.062561		1.18781	0.267029
	-15.0931	0.0564575		1.19267	0.283813
	-15.0779	0.0793457		1.19755	0.274658
	-15.0726	0.0961304		1.20244	0.270081
	-15.0771	0.128174		1.20735	0.283813
	-15.0911	0.125122		1.21228	0.273132
	-15.114	0.120544		1.21722	0.239563
	-15.1456	0.123596		1.22217	0.215149
	-15.1851	0.0976562		1.22715	0.204468
	-15.2322	0.0900269		1.23213	0.201416
	-15.286	0.0808716		1.23714	0.242615
	-15.3462	0.0854492		0.863323	0.228882
	-15.4123	0.102234		0.877426	0.227356
	-15.4841	0.117493		0.892657	0.19989
	-15.5613	0.115967		0.90885	0.210571
	-15.6441	0.138855		0.925704	0.215149
	-15.7326	0.1297		0.942774	0.190735
	-15.8271	0.105286		0.959492	0.149536
	-15.9278	0.0793457		0.97522	0.144958
	-16.0348	0.0549316		0.989294	0.157166
	-16.1481	0.088501		1.00107	0.178528
	-16.2675	0.15564		1.00996	0.180054
	-16.3927	0.172424		1.01546	0.163269
	-16.5231	0.160217		1.0172	0.164795
	-16.6582	0.160217		1.01493	0.177002
	-16.7971	0.163269		1.00855	0.177002
	-16.939	0.170898		0.998137	0.169373
	-17.0831	0.126648		0.983887	0.152588
	-17.2284	0.112915		0.966145	0.151062
	-17.3742	0.117493		0.945386	0.158691
	-17.5199	0.143433		0.922163	0.18158
	-17.6646	0.149536		0.897056	0.204468
	-17.808	0.170898		0.870619	0.187683
	-17.9496	0.166321		0.843356	0.170898
	-18.0888	0.135803		0.815721	0.189209
	-18.225	0.138855		0.788122	0.178528
	-18.3579	0.144958		0.760927	0.126648
	-18.4866	0.167847		0.734456	0.108337
	-18.6108	0.158691		0.708981	0.135803
	-18.73	0.151062		0.684718	0.17395
	-18.8437	0.138855		0.661831	0.161743
	-18.9518	0.146484		0.640394	0.164795
	-19.0539	0.184631		0.620371	0.167847
	-19.1503	0.166321		0.601655	0.157166
	-19.2408	0.160217		0.584137	0.143433
	-19.3256	0.164795		0.567738	0.141907
	-19.4048	0.183105		0.552427	0.157166
	-19.4784	0.175476		0.538237	0.166321
	-19.5461	0.195312		0.525284	0.18158
	-19.6079	0.205994		0.513775	0.190735
	-19.6633	0.204468		0.503999	0.163269
	-19.7119	0.210571		0.496281	0.152588
	-19.7532	0.190735		0.490888	0.149536
	-19.7867	0.178528		0.487935	0.151062
	-19.8119	0.184631		0.487331	0.146484
	-19.8284	0.204468		0.488795	0.14801
	-19.8359	0.184631		0.491949	0.166321
	-19.8343	0.18158		0.496442	0.157166
	-19.824	0.166321		0.502005	0.134277
	-19.8053	0.172424		0.508449	0.126648
	-19.7787	0.175476		0.515616	0.108337
	-19.7446	0.158691		0.523354	0.115967
	-19.7034	0.169373		0.531539	0.140381
	-19.6551	0.202942		0.540115	0.175476
	-19.5998	0.184631		0.549087	0.19989
	-19.5375	0.167847		0.55849	0.202942
	-19.4683	0.170898		0.568334	0.205994
	-19.3923	0.189209		0.578582	0.20752
	-19.3096	0.178528		0.589155	0.19989
	-19.2206	0.19989		0.599929	0.18158
	-19.1258	0.193787		0.610683	0.172424
	-19.0256	0.157166		0.621055	0.160217
	-18.9207	0.15564		0.630552	0.154114
	-18.812	0.14801		0.638588	0.152588
	-18.7001	0.117493		0.644512	0.180054
	-18.5859	0.111389		0.647655	0.17395
	-18.47	0.151062		0.647403	0.195312
	-18.3533	0.157166		0.64329	0.212097
	-18.2365	0.151062		0.635053	0.198364
	-18.1206	0.144958		0.622642	0.175476
	-18.0064	0.152588		0.606162	0.178528
	-17.8951	0.161743		0.585804	0.187683
	-17.7874	0.167847		0.561799	0.170898
	-17.6844	0.166321		0.534406	0.167847
	-17.587	0.169373		0.503922	0.17395
	-17.4958	0.160217		0.47067	0.166321
	-17.4116	0.140381		0.434945	0.175476
	-17.3347	0.128174		0.396991	0.190735
	-17.2657	0.131226		0.357013	0.180054
	-17.2047	0.135803		0.31518	0.152588
	-17.152	0.172424		0.271608	0.172424
	-17.1079	0.178528		0.226333	0.166321
	-17.0725	0.17395		0.179292	0.158691
	-17.046	0.17395		0.130311	0.154114
	-17.0288	0.151062		0.0791117	0.141907
	-17.021	0.15564		0.025316	0.134277
	-17.023	0.157166		-0.0315387	0.126648
	-17.0348	0.132751		-0.0920065	0.131226
	-17.0567	0.114441		-0.156717	0.138855
	-17.0884	0.120544		-0.226283	0.186157
	-17.1301	0.119019		-0.301191	0.186157
	-17.1812	0.0915527		-0.381758	0.152588
	-17.2414	0.0457764		-0.468134	0.140381
	-17.3102	0.0595093		-0.560286	0.131226
	-17.3869	0.0747681		-0.65796	0.128174
	-17.4709	0.0839233		-0.760666	0.135803
	-17.5619	0.0793457		-0.867675	0.137329
	-17.6596	0.0473022		-0.97803	0.141907
	-17.7642	0.0396729		-1.09053	0.115967
	-17.8758	0.0213623		-1.20373	0.100708
	-17.9947	0.0518799		-1.31604	0.102234
	-18.1212	0.0930786		-1.42581	0.0991821
	-18.2553	0.112915		-1.53145	0.115967
	-18.3968	0.134277		-1.63151	0.114441
	-18.545	0.151062		-1.72474	0.120544
	-18.6991	0.152588		-1.81008	0.115967
	-18.8578	0.141907		-1.88672	0.115967
	-19.0197	0.143433		-1.95401	0.114441
	-19.1834	0.143433		-2.01146	0.0778198
	-19.3474	0.152588		-2.0587	0.0564575
	-19.5104	0.151062		-2.09551	0.0656128
	-19.6709	0.109863		-2.12181	0.0564575
	-19.8278	0.0946045		-2.13777	0.0640869
	-19.9799	0.0854492		-2.1437	0.0854492
	-20.1262	0.0823975		-2.14011	0.0854492
	-20.2654	0.0808716		-2.12752	0.0778198
	-20.3968	0.0549316		-2.10647	0.0671387
	-20.5196	0.0564575		-2.07734	0.0915527
	-20.6331	0.0534058		-2.04043	0.114441
	-20.737	0.062561		-1.99585	0.143433
	-20.831	0.0869751		-1.94361	0.15564
	-20.9147	0.111389		-1.88363	0.132751
	-20.9879	0.106812		-1.81577	0.111389
	-21.0507	0.109863		-1.73978	0.108337
	-21.1031	0.108337		-1.65534	0.105286
	-21.1453	0.114441		-1.56207	0.0976562
	-21.1774	0.117493		-1.45954	0.0976562
	-21.1996	0.120544		-1.34741	0.105286
	-21.2121	0.140381		-1.22544	0.115967
	-21.215	0.135803		-1.09352	0.125122
	-21.2086	0.0991821		-0.951732	0.1297
	-21.193	0.126648		-0.800325	0.100708
	-21.1685	0.141907		-0.639767	0.112915
	-21.1352	0.134277		-0.47069	0.163269
	-21.0935	0.14801		-0.293838	0.175476
	-21.0433	0.152588		-0.110035	0.170898
	-20.985	0.189209		0.0798501	0.190735
	-20.9187	0.202942		0.274929	0.196838
	-20.8444	0.186157		0.474327	0.212097
	-20.7622	0.158691		0.677203	0.224304
	-20.6721	0.144958		0.88272	0.262451
	-20.5739	0.151062		1.09001	0.250244
	-20.4677	0.157166		1.29813	0.230408
	-20.3532	0.160217		1.50605	0.234985
	-20.2305	0.134277		1.71265	0.239563
	-20.0998	0.138855		1.91669	0.233459
	-19.9613	0.143433		2.1169	0.257874
	-19.8157	0.143433		2.31194	0.265503
	-19.6641	0.149536		2.50045	0.265503
	-19.5074	0.140381		2.68112	0.242615
	-19.3469	0.15564		2.85264	0.221252
	-19.1841	0.172424		3.01372	0.218201
	-19.0203	0.169373		3.16313	0.216675
	-18.8566	0.190735		3.29966	0.18158
	-18.6943	0.230408		3.42219	0.213623
	-18.5344	0.256348		3.52963	0.233459
	-18.3778	0.259399		3.62098	0.215149
	-18.2253	0.273132		3.69537	0.19989
	-18.0774	0.267029		3.75205	0.193787
	-17.9348	0.262451		3.7905	0.192261
	-17.7981	0.267029		3.81044	0.190735
	-17.6678	0.282288		3.81187	0.221252
	-17.5444	0.279236		3.79507	0.222778
	-17.4282	0.265503		3.76061	0.20752
	-17.3199	0.219727		3.70922	0.215149
	-17.2196	0.195312		3.64179	0.190735
	-17.128	0.195312		3.5593	0.175476
	-17.0451	0.192261		3.46269	0.166321
	-16.9715	0.131226		3.35297	0.152588
	-16.9072	0.119019		3.23119	0.144958
	-16.8524	0.126648		3.09857	0.157166
	-16.8072	0.169373		2.95645	0.160217
	-16.7714	0.184631		2.80635	0.160217
	-16.7448	0.161743		2.64995	0.164795
	-16.727	0.178528		2.48916	0.157166
	-16.7177	0.183105		2.32613	0.18158
	-16.7164	0.175476		2.16318	0.187683
	-16.7226	0.161743		2.00272	0.166321
	-16.736	0.177002		1.84719	0.163269
	-16.7562	0.183105		1.69898	0.152588
	-16.783	0.172424		1.5604	0.135803
	-16.8159	0.180054		1.43365	0.125122
	-16.8549	0.166321		1.32075	0.143433
	-16.8997	0.146484		1.22347	0.164795
	-16.9504	0.138855		1.14324	0.177002
	-17.0069	0.141907		1.0811	0.17395
	-17.0692	0.17395		1.03775	0.154114
	-17.1372	0.18158		1.01355	0.14801
	-17.2108	0.196838		1.00854	0.166321
	-17.2898	0.192261		1.02251	0.178528
	-17.3739	0.172424		1.05493	0.180054
	-17.4629	0.20752		1.10501	0.172424
	-17.5563	0.222778		1.17178	0.178528
	-17.6538	0.221252		1.25406	0.18158
	-17.7549	0.25177		1.35055	0.195312
	-17.8593	0.274658		1.45987	0.20752
	-17.9665	0.257874		1.58062	0.209045
	-18.0764	0.236511		1.71148	0.183105
	-18.1888	0.212097		1.85126	0.157166
	-18.3035	0.213623		1.99897	0.146484
	-18.4205	0.221252		2.15378	0.132751
	-18.5395	0.215149		2.31497	0.161743
	-18.6601	0.201416		2.48185	0.178528
	-18.7816	0.209045		2.65364	0.186157
	-18.9032	0.198364		2.82948	0.201416
	-19.0239	0.192261		3.00843	0.184631
	-19.1426	0.183105		3.18946	0.175476
	-19.2581	0.187683		3.37139	0.17395
	-19.3692	0.175476		3.55297	0.15564
	-19.4747	0.187683		3.73295	0.132751
	-19.5736	0.201416		3.91014	0.0930786
	-19.6649	0.213623		4.08347	0.0656128
	-19.7478	0.245666		4.25203	0.0747681
	-19.8215	0.257874		4.41503	0.109863
	-19.8856	0.257874		4.57181	0.12207
	-19.9395	0.245666		4.72186	0.119019
	-19.9829	0.268555		4.86477	0.0976562
	-20.0156	0.282288		5.0003	0.0976562
	-20.0376	0.268555		5.12823	0.149536
	-20.0491	0.238037		5.24839	0.167847
	-20.0502	0.236511		5.36058	0.160217
	-20.0415	0.247192		5.46458	0.144958
	-20.0236	0.228882		5.56014	0.115967
	-19.997	0.233459		5.64698	0.119019
	-19.9627	0.221252		5.72467	0.135803
	-19.9213	0.210571		5.79264	0.144958
	-19.8739	0.22583		5.85005	0.143433
	-19.8214	0.22583		5.89588	0.115967
	-19.7648	0.22583		5.92898	0.0930786
	-19.7049	0.222778		5.94816	0.0564575
	-19.6427	0.186157		5.95235	0.0579834
	-19.579	0.175476		5.94055	0.0656128
	-19.5144	0.143433		5.91197	0.0457764
	-19.4497	0.0961304		5.86605	0.0427246
	-19.3854	0.0900269		5.80255	0.038147
	-19.3219	0.112915		5.72159	0.0488281
	-19.2595	0.138855		5.62361	0.0610352
	-19.1984	0.180054		5.5094	0.0793457
	-19.1384	0.170898		5.38004	0.0869751
	-19.0796	0.161743		5.23689	0.0762939
	-19.0215	0.154114		5.08149	0.0762939
	-18.964	0.140381		4.91554	0.109863
	-18.9067	0.140381		4.74084	0.149536
	-18.8493	0.166321		4.55918	0.160217
	-18.7917	0.183105		4.37231	0.163269
	-18.7334	0.193787		4.18186	0.154114
	-18.6744	0.180054		3.98934	0.115967
	-18.6143	0.158691		3.79616	0.102234
	-18.5533	0.141907		3.60361	0.114441
	-18.4915	0.167847		3.413	0.120544
	-18.4294	0.169373		3.22561	0.10376
	-18.3676	0.151062		3.04269	0.0854492
	-18.3064	0.115967		2.86542	0.111389
	-18.2464	0.102234		2.69504	0.141907
	-18.1879	0.100708		2.53277	0.149536
	-18.131	0.0991821		2.37977	0.149536
	-18.0758	0.105286		2.23697	0.15564
	-18.0221	0.123596		2.105	0.172424
	-17.97	0.0701904		1.98425	0.190735
	-17.9192	0.00457764		1.87495	0.186157
	-17.8695	-0.00305176		1.77732	0.186157
	-17.8208	0.0305176		1.69163	0.183105
	-17.7729	0.0595093		1.61822	0.178528
	-17.7253	0.0640869		1.55747	0.166321
	-17.6778	0.0915527		1.50979	0.164795
	-17.63	0.134277		1.4756	0.146484
	-17.5817	0.161743		1.45528	0.157166
	-17.5328	0.166321		1.44916	0.146484
	-17.4832	0.163269		1.45751	0.137329
	-17.433	0.125122		1.48043	0.157166
	-17.3824	0.106812		1.51785	0.175476
	-17.3314	0.123596		1.56947	0.178528
	-17.2803	0.160217		1.63474	0.166321
	-17.2293	0.193787		1.71289	0.175476
	-17.1787	0.205994		1.80294	0.187683
	-17.1286	0.186157		1.90372	0.198364
	-17.0794	0.158691		2.01391	0.228882
	-17.0313	0.167847		2.13212	0.254822
	-16.9848	0.198364		2.25699	0.238037
	-16.9403	0.198364		2.3873	0.219727
	-16.8985	0.204468		2.52191	0.222778
	-16.8598	0.19989		2.65972	0.224304
	-16.825	0.193787		2.79979	0.193787
	-16.7945	0.210571		2.94138	0.167847
	-16.769	0.244141		3.08403	0.180054
	-16.7487	0.260925		3.22751	0.15564
	-16.7341	0.242615		3.37177	0.140381
	-16.7253	0.213623		3.51684	0.134277
	-16.7224	0.19989		3.6628	0.164795
	-16.7253	0.195312		3.80975	0.177002
	-16.7339	0.18158		3.95775	0.18158
	-16.7479	0.169373		4.10676	0.175476
	-16.767	0.166321		4.25662	0.183105
	-16.7909	0.146484		4.40714	0.195312
	-16.8191	0.126648		4.55802	0.210571
	-16.851	0.135803		4.70887	0.219727
	-16.8864	0.14801		4.8592	0.205994
	-16.9247	0.170898		5.00838	0.215149
	-16.9658	0.190735		5.15568	0.201416
	-17.0096	0.216675		5.3003	0.19989
	-17.0561	0.212097		5.44136	0.167847
	-17.1049	0.166321		5.57795	0.151062
	-17.1557	0.134277		5.70908	0.143433
	-17.2082	0.112915		5.83365	0.126648
	-17.2616	0.128174		5.95045	0.114441
	-17.3155	0.126648		6.05816	0.0900269
	-17.369	0.10376		6.15535	0.088501
	-17.4216	0.141907		6.24058	0.100708
	-17.4725	0.152588		6.31253	0.123596
	-17.5214	0.137329		6.37003	0.112915
	-17.5678	0.132751		6.41219	0.119019
	-17.6114	0.15564		6.43838	0.117493
	-17.652	0.187683		6.44826	0.132751
	-17.6894	0.210571		6.44173	0.144958
	-17.7236	0.18158		6.41894	0.160217
	-17.7545	0.140381		6.38026	0.123596
	-17.7823	0.170898		6.32626	0.100708
	-17.8072	0.198364		6.25779	0.106812
	-17.8293	0.195312		6.17588	0.14801
	-17.849	0.170898		6.08175	0.14801
	-17.8666	0.164795		5.97674	0.15564
	-17.8824	0.160217		5.86224	0.140381
	-17.8965	0.160217		5.7397	0.137329
	-17.9092	0.163269		5.61062	0.146484
	-17.9204	0.138855		5.47644	0.186157
	-17.9304	0.135803		5.33842	0.186157
	-17.9391	0.183105		5.19758	0.175476
	-17.9467	0.186157		5.05466	0.180054
	-17.953	0.164795		4.91023	0.205994
	-17.9584	0.141907		4.76483	0.221252
	-17.9629	0.132751		4.61892	0.205994
	-17.9667	0.137329		4.47292	0.219727
	-17.9698	0.131226		4.32719	0.22583
	-17.9726	0.1297		4.182	0.244141
	-17.975	0.158691		4.03768	0.259399
	-17.9774	0.14801		3.89455	0.247192
	-17.9798	0.114441		3.75293	0.205994
	-17.9822	0.125122		3.61318	0.205994
	-17.9847	0.123596		3.47576	0.19989
	-17.9872	0.128174		3.34124	0.190735
	-17.9897	0.164795		3.21031	0.196838
	-17.9921	0.189209		3.08384	0.20752
	-17.9941	0.18158		2.96292	0.20752
	-17.9956	0.184631		2.8488	0.196838
	-17.9966	0.190735		2.7429	0.187683
	-17.9969	0.213623		2.64665	0.186157
	-17.9963	0.215149		2.56143	0.215149
	-17.995	0.222778		2.48848	0.19989
	-17.9928	0.19989		2.42889	0.20752
	-17.9901	0.193787		2.38356	0.184631
	-17.9869	0.198364		2.3531	0.193787
	-17.9833	0.202942		2.3378	0.213623
	-17.9795	0.190735		2.33759	0.187683
	-17.9753	0.169373		2.352	0.14801
	-17.9707	0.151062		2.38026	0.117493
	-17.9657	0.15564		2.42131	0.102234
	-17.9601	0.14801		2.47389	0.115967
	-17.9538	0.138855		2.53652	0.1297
	-17.9467	0.160217		2.60759	0.106812
	-17.9386	0.18158		2.68542	0.120544
	-17.9295	0.189209		2.76838	0.132751
	-17.9196	0.205994		2.85496	0.115967
	-17.9088	0.222778		2.94385	0.112915
	-17.8972	0.257874		3.03397	0.0961304
	-17.8847	0.25177		3.12453	0.0854492
	-17.8713	0.218201		3.21504	0.115967
	-17.857	0.218201		3.30537	0.141907
	-17.8418	0.231934		3.39574	0.161743
	-17.8258	0.221252		3.48667	0.154114
	-17.8091	0.209045		3.57896	0.137329
	-17.792	0.233459		3.67358	0.128174
	-17.7749	0.263977		3.77149	0.131226
	-17.758	0.268555		3.87355	0.125122
	-17.7418	0.245666		3.98051	0.123596
	-17.7262	0.239563		4.09292	0.137329
	-17.7115	0.230408		4.21103	0.152588
	-17.6976	0.248718		4.33476	0.146484
	-17.6847	0.253296		4.46376	0.14801
	-17.6726	0.22583		4.59746	0.167847
	-17.6614	0.205994		4.73512	0.198364
	-17.6511	0.195312		4.87587	0.180054
	-17.6415	0.19989		5.01876	0.154114
	-17.6333	0.192261		5.16274	0.146484
	-17.6266	0.169373		5.30676	0.140381
	-17.6216	0.160217		5.44977	0.149536
	-17.6181	0.170898		5.59077	0.151062
	-17.616	0.201416		5.72883	0.14801
	-17.6151	0.204468		5.86307	0.115967
	-17.6151	0.175476		5.99268	0.126648
	-17.6159	0.169373		6.1169	0.123596
	-17.6171	0.170898		6.23495	0.0991821
	-17.6185	0.17395		6.34612	0.0762939
	-17.6198	0.189209		6.44969	0.088501
	-17.6209	0.190735		6.54498	0.0732422
	-17.6214	0.190735		6.63134	0.0823975
	-17.6213	0.189209		6.70815	0.0869751
	-17.6206	0.210571		6.77487	0.0961304
	-17.6192	0.212097		6.83099	0.109863
	-17.617	0.205994		6.87615	0.1297
	-17.6141	0.221252		6.91009	0.144958
	-17.6106	0.227356		6.93267	0.143433
	-17.6064	0.209045		6.94389	0.149536
	-17.6018	0.186157		6.94385	0.1297
	-17.5968	0.163269		6.93275	0.137329
	-17.5915	0.137329		6.91084	0.144958
	-17.5861	0.109863		6.87845	0.128174
	-17.5805	0.114441		6.83592	0.169373
	-17.5749	0.144958		6.78361	0.204468
	-17.5693	0.144958		6.7219	0.192261
	-17.5638	0.131226		6.65116	0.183105
	-17.5586	0.131226		6.57186	0.15564
	-17.5535	0.134277		6.48447	0.164795
	-17.5487	0.134277		6.38955	0.167847
	-17.5442	0.144958		6.28764	0.190735
	-17.5398	0.15564		6.17931	0.205994
	-17.5355	0.143433		6.06511	0.170898
	-17.5312	0.152588		5.94556	0.167847
	-17.5268	0.160217		5.82119	0.189209
	-17.5223	0.154114		5.69244	0.160217
	-17.5176	0.164795		5.55976	0.160217
	-17.5126	0.19989		5.42355	0.193787
	-17.5073	0.209045		5.28419	0.210571
	-17.5017	0.193787		5.14212	0.202942
	-17.4959	0.183105		4.9979	0.183105
	-17.4898	0.131226		4.85224	0.172424
	-17.4836	0.125122		4.70604	0.186157
	-17.4774	0.163269		4.56034	0.209045
	-17.4715	0.184631		4.41624	0.216675
	-17.4662	0.170898		4.27484	0.218201
	-17.4618	0.183105		4.13725	0.241089
	-17.4587	0.183105		4.00456	0.239563
	-17.4564	0.175476		3.87778	0.221252
	-17.454	0.17395		3.75785	0.169373
	-17.4517	0.161743		3.64557	0.12207
	-17.4495	0.152588		3.54167	0.123596
	-17.4473	0.151062		3.44682	0.1297
	-17.4451	0.158691		3.36161	0.117493
	-17.4429	0.18158		3.28649	0.143433
	-17.4409	0.175476		3.22181	0.170898
	-17.4388	0.169373		3.16777	0.172424
	-17.4368	0.184631		3.12443	0.154114
	-17.4348	0.20752		3.09174	0.141907
	-17.4329	0.230408		3.06949	0.158691
	-17.431	0.205994		3.05732	0.17395
	-17.4292	0.167847		3.05472	0.212097
	-17.4274	0.166321		3.06107	0.244141
	-17.4256	0.18158		3.07568	0.244141
	-17.4239	0.20752		3.09789	0.233459
	-17.4222	0.186157		3.12713	0.210571
	-17.4206	0.14801		3.16292	0.209045
	-17.419	0.123596		3.20491	0.215149
	-17.4174	0.14801		3.25283	0.221252
	-17.4159	0.163269		3.30648	0.257874
	-17.4145	0.161743		3.36571	0.241089
	-17.413	0.137329		3.43042	0.222778
	-17.4117	0.131226		3.50058	0.202942
	-17.4103	0.134277		3.57615	0.189209
	-17.409	0.135803		3.65708	0.189209
	-17.4078	0.137329		3.74331	0.20752
	-17.4066	0.138855		3.83467	0.241089
	-17.4054	0.152588		3.93091	0.291443
	-17.4043	0.154114		4.03162	0.283813
	-17.4032	0.149536		4.13629	0.256348
	-17.4021	0.170898		4.24429	0.22583
	-17.4011	0.163269		4.35482	0.212097
	-17.4001	0.18158		4.46695	0.218201
	-17.3991	0.205994		4.57965	0.212097
	-17.3982	0.177002		4.69185	0.204468
	-17.3973	0.134277		4.80254	0.198364
	-17.3965	0.132751		4.91082	0.202942
	-17.3957	0.137329		5.0159	0.183105
	-17.3949	0.120544		5.1171	0.152588
	-17.3941	0.117493		5.21381	0.140381
	-17.3934	0.138855		5.30556	0.128174
	-17.3926	0.151062		5.39192	0.137329
	-17.392	0.160217		5.47253	0.138855
	-17.3913	0.144958		5.54705	0.138855
	-17.3906	0.143433		5.61514	0.161743
	-17.39	0.149536		5.67642	0.146484
	-17.3894	0.167847		5.73051	0.152588
	-17.3888	0.18158		5.77697	0.169373
	-17.3883	0.137329		5.81536	0.172424
	-17.3877	0.115967		5.84528	0.184631
	-17.3872	0.12207		5.86635	0.196838
	-17.3866	0.152588		5.87836	0.212097
	-17.3861	0.187683		5.88126	0.222778
	-17.3856	0.186157		5.87524	0.244141
	-17.3851	0.160217		5.86066	0.274658
	-17.3846	0.158691		5.83802	0.283813
	-17.384	0.157166		5.80797	0.265503
	-17.3835	0.141907		5.77116	0.244141
	-17.383	0.123596		5.72829	0.216675
	-17.3825	0.0930786		5.68	0.193787
	-17.382	0.0869751		5.62688	0.19989
	-17.3815	0.088501		5.56945	0.210571
	-17.3809	0.0839233		5.50812	0.210571
	-17.3804	0.10376		5.44327	0.210571
	-17.3798	0.109863		5.37516	0.236511
	-17.3793	0.0946045		5.30402	0.250244
	-17.3787	0.0823975		5.23006	0.245666
	-17.3781	0.0488281		5.15349	0.253296
	-17.3775	0.0518799		5.07453	0.241089
	-17.3768	0.0442505		4.99339	0.230408
	-17.3762	0.038147		4.91023	0.218201
	-17.3755	0.0747681		4.82514	0.224304
	-17.3748	0.0717163		4.73815	0.218201
	-17.3741	0.0747681		4.6491	0.224304
	-17.3733	0.0854492		4.55774	0.231934
	-17.3725	0.131226		4.46368	0.228882
	-17.3717	0.119019		4.36647	0.218201
	-17.3709	0.115967		4.26569	0.210571
	-17.37	0.131226		4.16099	0.190735
	-17.3691	0.146484		4.05217	0.210571
	-17.3682	0.149536		3.93922	0.210571
	-17.3673	0.143433		3.82232	0.190735
	-17.3663	0.1297		3.7019	0.180054
	-17.3652	0.154114		3.57874	0.186157
	-17.3642	0.17395		3.45399	0.20752
	-17.3631	0.187683		3.32917	0.19989
	-17.362	0.167847		3.20605	0.192261
	-17.3608	0.160217		3.08656	0.202942
	-17.3596	0.166321		2.9727	0.198364
	-17.3584	0.180054		2.86646	0.175476
	-17.3571	0.198364		2.76974	0.135803
	-17.3558	0.218201		2.68417	0.109863
	-17.3544	0.210571		2.61102	0.108337
	-17.353	0.187683		2.55104	0.140381
	-17.3516	0.192261		2.50457	0.170898
	-17.3501	0.166321		2.47147	0.186157
	-17.3486	0.161743		2.45133	0.175476
	-17.3471	0.160217		2.44343	0.154114
	-17.3455	0.170898		2.4469	0.15564
	-17.3438	0.195312		2.46072	0.202942
	-17.3422	0.189209		2.48387	0.227356
	-17.3405	0.17395		2.51538	0.190735
	-17.3387	0.154114		2.55434	0.152588
	-17.3369	0.167847		2.59992	0.141907
	-17.3351	0.177002		2.65144	0.131226
	-17.3332	0.170898		2.70834	0.132751
	-17.3313	0.18158		2.77022	0.158691
	-17.3294	0.209045		2.83679	0.184631
	-17.3274	0.227356		2.90788	0.227356
	-17.3253	0.22583		2.98335	0.209045
	-17.3233	0.22583		3.06313	0.186157
	-17.3211	0.184631		3.14718	0.189209
	-17.319	0.172424		3.23558	0.189209
	-17.3168	0.157166		3.32849	0.175476
	-17.3146	0.161743		3.42616	0.161743
	-17.3123	0.17395		3.52892	0.172424
	-17.31	0.17395		3.63713	0.143433
	-17.3076	0.184631		3.75111	0.140381
	-17.3052	0.158691		3.87108	0.131226
	-17.3028	0.135803		3.99711	0.144958
	-17.3003	0.143433		4.12905	0.20752
	-17.2978	0.180054		4.26648	0.236511
	-17.2953	0.189209		4.40864	0.259399
	-17.2927	0.196838		4.55448	0.259399
	-17.29	0.205994		4.70266	0.233459
	-17.2874	0.192261		4.85176	0.186157
	-17.2846	0.192261		5.00032	0.186157
	-17.2819	0.202942		5.14698	0.192261
	-17.2791	0.201416		5.29048	0.189209
	-17.2763	0.202942		5.42966	0.172424
	-17.2734	0.18158		5.56346	0.18158
	-17.2705	0.172424		5.69096	0.166321
	-17.2675	0.205994		5.81132	0.187683
	-17.2645	0.178528		5.92383	0.204468
	-17.2615	0.137329		6.02791	0.19989
	-17.2584	0.134277		6.1231	0.196838
	-17.2553	0.138855		6.20906	0.215149
	-17.2521	0.158691		6.28557	0.201416
	-17.2489	0.166321		6.35251	0.186157
	-17.2457	0.144958		6.40987	0.205994
	-17.2424	0.106812		6.45775	0.192261
	-17.2391	0.1297		6.49635	0.184631
	-17.2358	0.146484		6.5259	0.178528
	-17.2324	0.134277		6.54647	0.175476
	-17.2289	0.143433		6.55807	0.170898
	-17.2254	0.152588		6.56069	0.158691
	-17.2219	0.149536		6.55439	0.152588
	-17.2184	0.131226		6.53928	0.143433
	-17.2148	0.12207		6.51552	0.149536
	-17.2111	0.108337		6.48331	0.141907
	-17.2075	0.12207		6.44287	0.125122
	-17.2037	0.160217		6.39452	0.0808716
	-17.2	0.138855		6.33866	0.0564575
	-17.1962	0.112915		6.27576	0.0793457
	-17.1924	0.112915		6.20639	0.109863
	-17.1885	0.120544		6.13114	0.120544
	-17.1846	0.12207		6.05061	0.0900269
	-17.1806	0.0808716		5.96541	0.0961304
	-17.1766	0.0808716		5.87616	0.111389
	-17.1726	0.0778198		5.78342	0.108337
	-17.1685	0.108337		5.68772	0.115967
	-17.1644	0.115967		5.58946	0.106812
	-17.1603	0.112915		5.48896	0.105286
	-17.1561	0.114441		5.38648	0.100708
	-17.1518	0.100708		5.28234	0.10376
	-17.1476	0.105286		5.17687	0.117493
	-17.1433	0.111389		5.07047	0.114441
	-17.1389	0.108337		4.96347	0.105286
	-17.1345	0.111389		4.85604	0.111389
	-17.1301	0.109863		4.74819	0.126648
	-17.1256	0.131226		4.6397	0.138855
	-17.1211	0.131226		4.53021	0.125122
	-17.1166	0.157166		4.41923	0.125122
	-17.112	0.184631		4.3062	0.157166
	-17.1074	0.17395		4.19063	0.164795
	-17.1027	0.125122		4.07222	0.131226
	-17.0981	0.0823975		3.95097	0.112915
	-17.0933	0.100708		3.82717	0.120544
	-17.0886	0.135803		3.70148	0.146484
	-17.0838	0.1297		3.57481	0.161743
	-17.0789	0.0839233		3.44833	0.141907
	-17.074	0.0717163		3.32335	0.135803
	-17.0691	0.0717163		3.20128	0.128174
	-17.0642	0.0717163		3.08357	0.112915
	-17.0592	0.088501		2.97169	0.0961304
	-17.0542	0.0900269		2.86709	0.105286
	-17.0491	0.0854492		2.77114	0.10376
	-17.044	0.0671387		2.68514	0.102234
	-17.0389	0.0564575		2.61027	0.117493
	-17.0337	0.0686645		2.54742	0.128174
	-17.0285	0.0717163		2.49717	0.0869751
	-17.0233	0.0778198		2.45965	0.0732422
	-17.018	0.111389		2.43456	0.0854492
	-17.0127	0.135803		2.4212	0.105286
	-17.0073	0.140381		2.41861	0.102234
	-17.002	0.134277		2.42568	0.0793457
	-16.9965	0.126648		2.44126	0.0869751
	-16.9911	0.114441		2.46425	0.10376
	-16.9856	0.112915		2.49363	0.123596
	-16.9801	0.135803		2.52853	0.135803
	-16.9745	0.152588		2.56822	0.137329
	-16.9689	0.154114		2.61221	0.131226
	-16.9633	0.166321		2.66022	0.138855
	-16.9576	0.183105		2.71214	0.158691
	-16.9519	0.178528		2.768	0.180054
	-16.9462	0.184631		2.8279	0.193787
	-16.9404	0.178528		2.89202	0.19989
	-16.9346	0.175476		2.9606	0.205994
	-16.9287	0.205994		3.03389	0.189209
	-16.9229	0.212097		3.11216	0.169373
	-16.917	0.178528		3.19567	0.167847
	-16.911	0.163269		3.2847	0.201416
	-16.905	0.166321		3.37945	0.222778
	-16.899	0.158691		3.48001	0.221252
	-16.8929	0.154114		3.58635	0.233459
	-16.8869	0.151062		3.69837	0.215149
	-16.8807	0.158691		3.81584	0.201416
	-16.8746	0.151062		3.93844	0.190735
	-16.8684	0.131226		4.06565	0.195312
	-16.8621	0.135803		4.19674	0.201416
	-16.8559	0.151062		4.33067	0.215149
	-16.8496	0.193787		4.46621	0.209045
	-16.8433	0.222778		4.6019	0.204468
	-16.8369	0.242615		4.73614	0.216675
	-16.8305	0.254822		4.86718	0.222778
	-16.8241	0.267029		4.99324	0.209045
	-16.8176	0.267029		5.11261	0.212097
	-16.8111	0.253296		5.22372	0.201416
	-16.8045	0.236511		5.3252	0.196838
	-16.798	0.234985		5.41591	0.180054
	-16.7914	0.219727		5.49492	0.180054
	-16.7848	0.193787		5.56157	0.172424
	-16.7781	0.17395		5.61547	0.158691
	-16.7714	0.169373		5.65651	0.149536
	-16.7647	0.193787		5.68481	0.152588
	-16.7579	0.172424		5.70076	0.167847
	-16.7511	0.146484		5.70491	0.190735
	-16.7443	0.166321		5.69806	0.180054
	-16.7374	0.175476		5.6812	0.175476
	-16.7306	0.172424		5.65546	0.161743
	-16.7237	0.192261		5.622	0.175476
	-16.7167	0.222778		5.58181	0.175476
	-16.7097	0.234985		5.53565	0.166321
	-16.7028	0.228882		5.48411	0.158691
	-16.6957	0.212097		5.42765	0.164795
	-16.6887	0.201416		5.36661	0.186157
	-16.6816	0.193787		5.30121	0.192261
	-16.6745	0.198364		5.23159	0.216675
	-16.6673	0.180054		5.15775	0.178528
	-16.6602	0.180054		5.07968	0.151062
	-16.653	0.180054		4.99735	0.178528
	-16.6458	0.177002		4.91084	0.170898
	-16.6386	0.163269		4.82037	0.178528
	-16.6313	0.167847		4.7263	0.192261
	-16.624	0.169373		4.62913	0.196838
	-16.6167	0.152588		4.52943	0.205994
	-16.6094	0.140381		4.42778	0.196838
	-16.602	0.1297		4.32477	0.187683
	-16.5946	0.123596		4.22091	0.186157
	-16.5872	0.126648		4.11666	0.189209
	-16.5798	0.14801		4.01234	0.184631
	-16.5724	0.158691		3.90819	0.183105
	-16.5649	0.163269		3.80439	0.164795
	-16.5574	0.178528		3.7011	0.166321
	-16.5499	0.186157		3.59848	0.166321
	-16.5424	0.190735		3.49671	0.160217
	-16.5349	0.218201		3.39604	0.163269
	-16.5273	0.227356		3.29686	0.14801
	-16.5197	0.219727		3.19968	0.143433
	-16.5122	0.245666		3.10517	0.154114
	-16.5045	0.233459		3.01413	0.177002
	-16.4969	0.224304		2.92744	0.175476
	-16.4893	0.213623		2.84604	0.17395
	-16.4816	0.224304		2.77083	0.160217
	-16.474	0.236511		2.70264	0.151062
	-16.4663	0.212097		2.64226	0.14801
	-16.4586	0.221252		2.59039	0.135803
	-16.4509	0.253296		2.54761	0.128174
	-16.4432	0.256348		2.51435	0.0991821
	-16.4354	0.239563		2.4909	0.0869751
	-16.4277	0.222778		2.4774	0.106812
	-16.4199	0.238037		2.47388	0.128174
	-16.4121	0.263977		2.48018	0.131226
	-16.4044	0.297546		2.49599	0.140381
	-16.3966	0.302124		2.52086	0.137329
	-16.3888	0.253296		2.55421	0.137329
	-16.381	0.204468		2.59542	0.152588
	-16.3731	0.164795		2.64383	0.157166
	-16.3653	0.14801		2.69874	0.160217
	-16.3575	0.167847		2.75945	0.157166
	-16.3496	0.160217		2.82526	0.135803
	-16.3418	0.163269		2.89557	0.123596
	-16.3339	0.184631		2.96982	0.131226
	-16.326	0.198364		3.04749	0.111389
	-16.3182	0.172424		3.12806	0.0656128
	-16.3103	0.163269		3.21106	0.0549316
	-16.3024	0.151062		3.29612	0.0656128
	-16.2945	0.146484		3.38309	0.0823975
	-16.2866	0.160217		3.47194	0.102234
	-16.2787	0.131226		3.56281	0.0961304
	-16.2708	0.138855		3.65594	0.0869751
	-16.2629	0.17395		3.75171	0.0946045
	-16.2549	0.164795		3.8506	0.0839233
	-16.247	0.158691		3.9531	0.0579834
	-16.2391	0.170898		4.05966	0.0534058
	-16.2311	0.170898		4.17058	0.0671387
	-16.2232	0.175476		4.28598	0.0732422
	-16.2153	0.19989		4.40575	0.0823975
	-16.2073	0.193787		4.52955	0.0854492
	-16.1994	0.219727		4.65679	0.128174
	-16.1914	0.227356		4.78671	0.144958
	-16.1835	0.19989		4.91836	0.164795
	-16.1755	0.167847		5.0507	0.14801
	-16.1675	0.180054		5.18264	0.126648
	-16.1596	0.216675		5.31307	0.0976562
	-16.1516	0.218201		5.4409	0.0778198
	-16.1436	0.210571		5.56511	0.0839233
	-16.1357	0.205994		5.68477	0.108337
	-16.1277	0.161743		5.79902	0.126648
	-16.1197	0.152588		5.90711	0.157166
	-16.1117	0.135803		6.00833	0.187683
	-16.1037	0.105286		6.10203	0.198364
	-16.0957	0.106812		6.1876	0.192261
	-16.0877	0.126648		6.26444	0.17395
	-16.0797	0.151062		6.33196	0.186157
	-16.0718	0.205994		6.38965	0.189209
	-16.0638	0.228882		6.43712	0.178528
	-16.0557	0.20752		6.47414	0.164795
	-16.0477	0.160217		6.50064	0.193787
	-16.0397	0.143433		6.51673	0.166321
	-16.0317	0.134277		6.52264	0.164795
	-16.0237	0.132751		6.51871	0.18158
	-16.0157	0.0976562		6.50536	0.184631
	-16.0076	0.0808716		6.48312	0.172424
	-15.9996	0.0671387		6.45263	0.178528
	-15.9916	0.0854492		6.41456	0.170898
	-15.9835	0.111389		6.36966	0.151062
	-15.9755	0.135803		6.31865	0.163269
	-15.9674	0.123596		6.26223	0.184631
	-15.9594	0.108337		6.20107	0.193787
	-15.9513	0.105286		6.13574	0.212097
	-15.9432	0.106812		6.06678	0.202942
	-15.9352	0.111389		5.99468	0.175476
	-15.9271	0.1297		5.91991	0.175476
	-15.919	0.144958		5.8429	0.187683
	-15.9109	0.146484		5.76401	0.196838
	-15.9028	0.115967		5.68357	0.202942
	-15.8947	0.117493		5.60179	0.202942
	-15.8866	0.1297		5.5188	0.227356
	-15.8785	0.178528		5.43464	0.212097
	-15.8704	0.177002		5.34925	0.178528
	-15.8622	0.178528		5.26259	0.167847
	-15.8541	0.204468		5.17461	0.157166
	-15.846	0.190735		5.08538	0.140381
	-15.8378	0.17395		4.99498	0.117493
	-15.8297	0.161743		4.90352	0.0854492
	-15.8215	0.167847		4.81118	0.102234
	-15.8133	0.157166		4.71824	0.0991821
	-15.8051	0.161743		4.62514	0.0915527
	-15.797	0.167847		4.53245	0.112915
	-15.7888	0.18158		4.44086	0.125122
	-15.7806	0.189209		4.35112	0.128174
	-15.7723	0.230408		4.26401	0.152588
	-15.7641	0.198364		4.18033	0.169373
	-15.7559	0.192261		4.10094	0.18158
	-15.7477	0.186157		4.02667	0.177002
	-15.7394	0.161743		3.95836	0.175476
	-15.7312	0.172424		3.89675	0.18158
	-15.7229	0.196838		3.84253	0.166321
	-15.7147	0.193787		3.79625	0.170898
	-15.7064	0.19989		3.75834	0.151062
	-15.6981	0.209045		3.72901	0.119019
	-15.6898	0.198364		3.70822	0.0961304
	-15.6816	0.178528		3.69564	0.0854492
	-15.6733	0.184631		3.69065	0.088501
	-15.665	0.166321		3.69242	0.123596
	-15.6566	0.135803		3.70003	0.151062
	-15.6483	0.138855		3.7125	0.17395
	-15.64	0.177002		3.72895	0.193787
	-15.6317	0.189209		3.74856	0.204468
	-15.6233	0.202942		3.77063	0.279236
	-15.615	0.201416		3.79465	0.534058
	-15.6066	0.201416		3.82026	0.866699
	-15.5983	0.19989		3.84732	1.39618
	-15.5899	0.205994		3.87586	2.6123
	-15.5815	0.205994		3.90609	3.59039
	-15.5732	0.192261		3.93837	3.16772
	-15.5648	0.161743		3.9732	1.54114
	-15.5564	0.1297		4.01119	-0.260925
	-15.548	0.141907		4.05304	-1.59149
	-15.5396	0.164795		4.09951	-2.21863
	-15.5312	0.137329		4.15135	-2.26746
	-15.5228	0.14801		4.20918	-2.00195
	-15.5143	0.157166		4.27346	-1.66626
	-15.5059	0.140381		4.34444	-1.32446
	-15.4975	0.135803		4.42219	-1.01471
	-15.489	0.135803		4.50653	-0.724792
	-15.4806	0.15564		4.59707	-0.474548
	-15.4721	0.141907		4.69314	-0.285339
	-15.4637	0.114441		4.79389	-0.167847
	-15.4552	0.132751		4.89829	-0.0564575
	-15.4467	0.149536		5.00531	0.050354
	-15.4382	0.140381		5.1139	0.14801
	-15.4297	0.117493		5.22308	0.215149
	-15.4212	0.117493		5.33195	0.248718
	-15.4127	0.134277		5.43966	0.312805
	-15.4042	0.132751		5.5454	0.35553
	-15.3957	0.149536		5.6484	0.369263
	-15.3872	0.17395		5.74796	0.341797
	-15.3787	0.19989		5.84343	0.326538
	-15.3701	0.19989		5.93423	0.318909
	-15.3616	0.17395		6.01983	0.328064
	-15.353	0.144958		6.09975	0.320435
	-15.3445	0.132751		6.17358	0.334167
	-15.3359	0.125122		6.24094	0.346375
	-15.3273	0.123596		6.30151	0.343323
	-15.3187	0.141907		6.35505	0.32196
	-15.3101	0.152588		6.40138	0.32959
	-15.3015	0.149536		6.44037	0.325012
	-15.2929	0.134277		6.47195	0.308228
	-15.2842	0.143433		6.49608	0.317383
	-15.2756	0.167847		6.51273	0.291443
	-15.2669	0.169373		6.52182	0.265503
	-15.2583	0.149536		6.52322	0.263977
	-15.2496	0.128174		6.51674	0.27771
	-15.2409	0.146484		6.50219	0.289917
	-15.2322	0.167847		6.47943	0.296021
	-15.2235	0.192261		6.44841	0.285339
	-15.2148	0.231934		6.40916	0.25177
	-15.206	0.241089		6.36182	0.247192
	-15.1973	0.267029		6.30659	0.239563
	-15.1885	0.263977		6.24376	0.224304
	-15.1797	0.238037		6.1737	0.192261
	-15.1709	0.239563		6.09689	0.175476
	-15.1621	0.271606		6.01388	0.205994
	-15.1532	0.239563		5.92534	0.20752
	-15.1444	0.224304		5.83202	0.18158
	-15.1355	0.241089		5.73479	0.172424
	-15.1266	0.256348		5.63448	0.15564
	-15.1177	0.276184		5.53192	0.14801
	-15.1088	0.279236		5.42785	0.132751
	-15.0999	0.267029		5.32288	0.14801
	-15.0909	0.248718		5.21752	0.178528
	-15.0819	0.224304		5.1122	0.187683
	-15.0729	0.218201		5.00732	0.160217
	-15.0639	0.236511		4.9033	0.151062
	-15.0548	0.233459		4.80055	0.141907
	-15.0458	0.260925		4.69944	0.125122
	-15.0367	0.273132		4.60031	0.128174
	-15.0276	0.244141		4.50347	0.143433
	-15.0185	0.236511		4.40924	0.151062
	-15.0093	0.227356		4.31799	0.151062
	-15.0001	0.227356		4.2301	0.144958
	-14.9909	0.201416		4.14608	0.164795
	-14.9817	0.209045		4.06644	0.141907
	-14.9724	0.198364		3.99173	0.106812
	-14.9632	0.187683		3.9224	0.115967
	-14.9539	0.163269		3.85882	0.111389
	-14.9445	0.164795		3.80125	0.112915
	-14.9352	0.169373		3.74989	0.117493
	-14.9258	0.170898		3.70486	0.134277
	-14.9164	0.143433		3.66619	0.137329
	-14.9069	0.146484		3.63382	0.0915527
	-14.8975	0.193787		3.60756	0.0534058
	-14.888	0.238037		3.58715	0.0473023
	-14.8784	0.250244		3.5723	0.0747681
	-14.8689	0.227356		3.56269	0.126648
	-14.8593	0.175476		3.55804	0.140381
	-14.8497	0.163269		3.55802	0.144958
	-14.84	0.177002		3.5623	0.152588
	-14.8304	0.169373		3.57051	0.154114
	-14.8206	0.158691		3.58222	0.143433
	-14.8109	0.15564		3.59693	0.128174
	-14.8011	0.144958		3.61406	0.132751
	-14.7913	0.135803		3.63289	0.166321
	-14.7815	0.151062		3.65268	0.18158
	-14.7716	0.201416		3.67265	0.192261
	-14.7617	0.186157		3.69205	0.218201
	-14.7518	0.154114		3.71022	0.218201
	-14.7418	0.157166		3.72657	0.190735
	-14.7318	0.17395		3.74064	0.190735
	-14.7217	0.160217		3.75209	0.18158
	-14.7117	0.141907		3.76076	0.17395
	-14.7015	0.123596		3.7666	0.17395
	-14.6914	0.105286		3.76969	0.178528
	-14.6812	0.10376		3.77018	0.178528
	-14.671	0.120544		3.76829	0.18158
	-14.6607	0.106812		3.76431	0.196838
	-14.6504	0.100708		3.75851	0.170898
	-14.6401	0.0869751		3.75119	0.163269
	-14.6297	0.0732422		3.74266	0.172424
	-14.6193	0.0976562		3.73323	0.177002
	-14.6089	0.123596		3.72318	0.180054
	-14.5984	0.135803		3.71283	0.175476
	-14.5878	0.0900269		3.70243	0.187683
	-14.5773	0.100708		3.69214	0.192261
	-14.5667	0.1297		3.68203	0.233459
	-14.556	0.166321		3.67204	0.25177
	-14.5454	0.175476		3.66203	0.242615
	-14.5346	0.17395		3.65179	0.209045
	-14.5239	0.169373		3.64116	0.180054
	-14.5131	0.167847		3.63001	0.152588
	-14.5023	0.198364		3.6183	0.143433
	-14.4914	0.19989		3.60607	0.131226
	-14.4805	0.193787		3.59344	0.141907
	-14.4695	0.160217		3.58061	0.183105
	-14.4585	0.134277		3.56777	0.195312
	-14.4475	0.12207		3.55511	0.18158
	-14.4364	0.131226		3.54283	0.170898
	-14.4253	0.143433		3.5311	0.15564
	-14.4141	0.15564		3.5201	0.178528
	-14.403	0.140381		3.50997	0.196838
	-14.3917	0.138855		3.50082	0.205994
	-14.3804	0.158691		3.49275	0.202942
	-14.3691	0.193787		3.48583	0.167847
	-14.3578	0.198364		3.48016	0.15564
	-14.3464	0.170898		3.47587	0.166321
	-14.3349	0.175476		3.4731	0.164795
	-14.3235	0.17395		3.47199	0.160217
	-14.3119	0.184631		3.47266	0.15564
	-14.3004	0.212097		3.47515	0.172424
	-14.2888	0.228882		3.47948	0.18158
	-14.2772	0.221252		3.48553	0.149536
	-14.2655	0.218201		3.49312	0.126648
	-14.2538	0.210571		3.50195	0.14801
	-14.242	0.210571		3.51165	0.163269
	-14.2302	0.201416		3.52189	0.172424
	-14.2184	0.195312		3.53234	0.15564
	-14.2065	0.18158		3.54279	0.183105
	-14.1946	0.157166		3.55303	0.18158
	-14.1826	0.123596		3.56288	0.189209
	-14.1706	0.106812		3.57218	0.198364
	-14.1586	0.137329		3.58079	0.227356
	-14.1465	0.125122		3.58857	0.22583
	-14.1344	0.128174		3.59547	0.205994
	-14.1223	0.146484		3.60151	0.198364
	-14.1101	0.151062		3.60676	0.209045
	-14.0979	0.149536		3.6114	0.233459
	-14.0856	0.123596		3.61565	0.20752
	-14.0733	0.112915		3.61979	0.190735
	-14.0609	0.115967		3.62414	0.204468
	-14.0486	0.0946045		3.62898	0.205994
	-14.0361	0.108337		3.63449	0.19989
	-14.0237	0.0930786		3.64079	0.175476
	-14.0112	0.112915		3.65513	0.177002
	-13.9987	0.138855		3.66989	0.218201
	-13.9861	0.178528		3.68502	0.241089
	-13.9735	0.160217		3.70043	0.25177
	-13.9608	0.144958		3.71604	0.273132
	-13.9482	0.154114		3.73172	0.274658
	-13.9355	0.177002		3.74734	0.268555
	-13.9227	0.209045		3.76275	0.274658
	-13.9099	0.219727		3.77782	0.286865
	-13.8971	0.198364		3.79247	0.27771
	-13.8843	0.177002		3.80668	0.270081
	-13.8714	0.170898		3.82044	0.257874
	-13.8585	0.160217		3.83381	0.270081
	-13.8455	0.141907		3.84684	0.263977
	-13.8325	0.135803		3.85962	0.247192
	-13.8195	0.135803		3.87222	0.248718
	-13.8065	0.111389		3.88467	0.253296
	-13.7934	0.0915527		3.89698	0.245666
	-13.7803	0.0946045		3.90916	0.216675
	-13.7671	0.0915527		3.92119	0.215149
	-13.754	0.131226		3.93304	0.238037
	-13.7408	0.128174		3.9447	0.25177
	-13.7275	0.111389		3.95614	0.250244
	-13.7143	0.114441		3.96729	0.241089
	-13.701	0.143433		3.97806	0.239563
	-13.6877	0.137329		3.98826	0.227356
	-13.6743	0.119019		3.99763	0.230408
	-13.6609	0.120544		4.00588	0.212097
	-13.6475	0.126648		4.01268	0.196838
	-13.6341	0.149536		4.01772	0.172424
	-13.6207	0.152588		4.02074	0.144958
	-13.6072	0.149536		4.02152	0.140381
	-13.5937	0.143433		4.01995	0.167847
	-13.5802	0.144958		4.01599	0.192261
	-13.5666	0.137329		4.00975	0.210571
	-13.5531	0.149536		4.00139	0.221252
	-13.5395	0.14801		3.9912	0.213623
	-13.5259	0.131226		3.97955	0.190735
	-13.5122	0.117493		3.96683	0.167847
	-13.4986	0.108337		3.95349	0.17395
	-13.4849	0.123596		3.93995	0.178528
	-13.4712	0.132751		3.92665	0.17395
	-13.4575	0.117493		3.91396	0.152588
	-13.4438	0.125122		3.9022	0.134277
	-13.43	0.137329		3.89162	0.138855
	-13.4163	0.141907		3.88238	0.143433
	-13.4025	0.15564		3.87456	0.158691
	-13.3887	0.161743		3.86815	0.169373
	-13.3749	0.143433		3.86308	0.140381
	-13.3611	0.149536		3.85925	0.134277
	-13.3473	0.189209		3.85615	0.141907
	-13.3334	0.193787		3.85304	0.169373
	-13.3196	0.169373		3.84994	0.149536
	-13.3057	0.212097		3.84682	0.144958
	-13.2918	0.209045		3.84371	0.138855
	-13.2779	0.187683		3.84059	0.146484
	-13.264	0.175476		3.83747	0.154114
	-13.2501	0.205994		3.83435	0.177002
	-13.2362	0.231934		3.83122	0.163269
	-13.2223	0.213623		3.82809	0.196838
	-13.2084	0.178528		3.82496	0.209045
	-13.1944	0.17395		3.82183	0.205994
	-13.1805	0.158691		3.81869	0.213623
	-13.1666	0.167847		3.81555	0.204468
	-13.1526	0.178528		3.81241	0.190735
	-13.1386	0.184631		3.80927	0.169373
	-13.1247	0.141907		3.80612	0.14801
	-13.1107	0.126648		3.80297	0.135803
	-13.0968	0.128174		3.79982	0.149536
	-13.0828	0.137329		3.79667	0.163269
	-13.0688	0.160217		3.79351	0.161743
	-13.0548	0.186157		3.79035	0.157166
	-13.0409	0.190735		3.78719	0.167847
	-13.0269	0.195312		3.78403	0.178528
	-13.0129	0.186157		3.78087	0.167847
	-12.9989	0.210571		3.7777	0.175476
	-12.9849	0.215149		3.77453	0.169373
	-12.9709	0.204468		3.77136	0.154114
	-12.957	0.190735		3.76819	0.126648
	-12.943	0.17395		3.76501	0.134277
	-12.929	0.184631		3.76184	0.151062
	-12.915	0.196838		3.75866	0.158691
	-12.9011	0.180054		3.75548	0.125122
	-12.8871	0.157166		3.75229	0.100708
	-12.8731	0.166321		3.74911	0.117493
	-12.8591	0.189209		3.74592	0.15564
	-12.8452	0.192261		3.74273	0.158691
	-12.8312	0.184631		3.73954	0.160217
	-12.8173	0.169373		3.73635	0.157166
	-12.8033	0.157166		3.73316	0.161743
	-12.7893	0.166321		3.72996	0.151062
	-12.7754	0.193787		3.72677	0.123596
	-12.7614	0.193787		3.72357	0.120544
	-12.7475	0.169373		3.72037	0.1297
	-12.7336	0.144958		3.71717	0.140381
	-12.7196	0.134277		3.71396	0.144958
	-12.7057	0.140381		3.71076	0.166321
	-12.6918	0.163269		3.70755	0.183105
	-12.6779	0.177002		3.70435	0.18158
	-12.664	0.178528		3.70114	0.177002
	-12.6501	0.169373		3.69793	0.166321
	-12.6362	0.15564		3.69472	0.177002
	-12.6223	0.146484		3.6915	0.180054
	-12.6084	0.117493		3.68829	0.187683
	-12.5946	0.120544		3.68507	0.183105
	-12.5807	0.115967		3.68185	0.172424
	-12.5668	0.12207		3.67864	0.177002
	-12.553	0.12207		3.67542	0.172424
	-12.5392	0.112915		3.67219	0.177002
	-12.5253	0.117493		3.66897	0.166321
	-12.5115	0.126648		3.66575	0.14801
	-12.4977	0.135803		3.66252	0.123596
	-12.4839	0.117493		3.6593	0.131226
	-12.4701	0.0946045		3.65607	0.135803
	-12.4563	0.100708		3.65284	0.157166
	-12.4425	0.10376		3.64961	0.178528
	-12.4287	0.088501		3.64638	0.166321
	-12.415	0.088501		3.64315	0.158691
	-12.4012	0.0671387		3.63992	0.169373
	-12.3875	0.0549316		3.63668	0.15564
	-12.3737	0.0610352		3.63345	0.138855
	-12.36	0.0778198		3.63021	0.169373
	-12.3463	0.10376		3.62697	0.160217
	-12.3326	0.102234		3.62374	0.14801
	-12.3189	0.0869751		3.6205	0.14801
	-12.3052	0.0961304		3.61726	0.170898
	-12.2915	0.138855		3.61402	0.149536
	-12.2778	0.14801		3.61077	0.15564
	-12.2642	0.12207		3.60753	0.175476
	-12.2505	0.119019		3.60429	0.164795
	-12.2369	0.109863		3.60104	0.111389
	-12.2233	0.0793457		3.5978	0.0946045
	-12.2096	0.0640869		3.59455	0.108337
	-12.196	0.0839233		3.5913	0.12207
	-12.1824	0.0640869		3.58806	0.131226
	-12.1688	0.0701904		3.58481	0.112915
	-12.1553	0.0839233		3.58156	0.115967
	-12.1417	0.0915527		3.57831	0.114441
	-12.1281	0.115967		3.57506	0.106812
	-12.1146	0.0946045		3.5718	0.0747681
	-12.101	0.0793457		3.56855	0.0762939
	-12.0875	0.088501		3.5653	0.0946045
	-12.074	0.108337		3.56205	0.0991821
	-12.0605	0.108337		3.55879	0.0839233
	-12.047	0.120544		3.55554	0.0915527
	-12.0335	0.100708		3.55228	0.0793457
	-12.02	0.100708		3.54902	0.0823975
	-12.0065	0.115967		3.54577	0.088501
	-11.9931	0.140381		3.54251	0.0701904
	-11.9796	0.126648		3.53925	0.0961304
	-11.9662	0.106812		3.53599	0.131226
	-11.9528	0.112915		3.53274	0.14801
	-11.9394	0.114441		3.52948	0.14801
	-11.926	0.100708		3.52622	0.115967
	-11.9126	0.106812		3.52296	0.0961304
	-11.8992	0.135803		3.5197	0.111389
	-11.8858	0.163269		3.51644	0.119019
	-11.8725	0.163269		3.51318	0.115967
	-11.8591	0.17395		3.50991	0.14801
	-11.8458	0.175476		3.50665	0.18158
	-11.8325	0.195312		3.50339	0.177002
	-11.8192	0.205994		3.50013	0.164795
	-11.8059	0.178528		3.49687	0.151062
	-11.7926	0.187683		3.4936	0.166321
	-11.7794	0.193787		3.49034	0.177002
	-11.7661	0.202942		3.48708	0.190735
	-11.7529	0.184631		3.48382	0.198364
	-11.7397	0.140381		3.48055	0.210571
	-11.7265	0.114441		3.47729	0.231934
	-11.7133	0.123596		3.47403	0.224304
	-11.7001	0.135803		3.47077	0.230408
	-11.6869	0.154114		3.4675	0.236511
	-11.6738	0.134277		3.46424	0.221252
	-11.6607	0.134277		3.46098	0.177002
	-11.6475	0.158691		3.45771	0.17395
	-11.6344	0.163269		3.45445	0.224304
	-11.6213	0.177002		3.45119	0.228882
	-11.6083	0.20752		3.44792	0.218201
	-11.5952	0.239563		3.44466	0.215149
	-11.5822	0.260925		3.4414	0.178528
	-11.5691	0.270081		3.43814	0.172424
	-11.5561	0.263977		3.43488	0.167847
	-11.5431	0.234985		3.43161	0.202942
	-11.5301	0.221252		3.42835	0.224304
	-11.5171	0.219727		3.42509	0.234985
	-11.5042	0.209045		3.42183	0.222778
	-11.4912	0.19989		3.41857	0.210571
	-11.4783	0.204468		3.41531	0.231934
	-11.4654	0.190735		3.41205	0.224304
	-11.4525	0.184631		3.40879	0.19989
	-11.4396	0.19989		3.40553	0.177002
	-11.4267	0.161743		3.40227	0.160217
	-11.4139	0.160217		3.39901	0.144958
	-11.4011	0.196838		3.39575	0.149536
	-11.3882	0.236511		3.39249	0.135803
	-11.3754	0.244141		3.38924	0.149536
	-11.3626	0.215149		3.38598	0.137329
	-11.3499	0.192261		3.38272	0.1297
	-11.3371	0.195312		3.37947	0.112915
	-11.3244	0.212097		3.37621	0.108337
	-11.3116	0.209045		3.37295	0.140381
	-11.2989	0.166321		3.3697	0.163269
	-11.2862	0.180054		3.36645	0.184631
	-11.2735	0.209045		3.36319	0.167847
	-11.2609	0.212097		3.35994	0.14801
	-11.2482	0.20752		3.35669	0.15564
	-11.2356	0.18158		3.35344	0.172424
	-11.223	0.166321		3.35018	0.169373
	-11.2104	0.149536		3.34693	0.180054
	-11.1978	0.166321		3.34368	0.195312
	-11.1852	0.17395		3.34043	0.205994
	-11.1727	0.189209		3.33719	0.20752
	-11.1602	0.209045		3.33394	0.204468
	-11.1477	0.212097		3.33069	0.193787
	-11.1352	0.189209		3.32744	0.184631
	-11.1227	0.19989		3.3242	0.169373
	-11.1102	0.20752		3.32095	0.175476
	-11.0978	0.201416		3.31771	0.18158
	-11.0854	0.22583		3.31447	0.205994
	-11.073	0.224304		3.31122	0.224304
	-11.0606	0.198364		3.30798	0.22583
	-11.0482	0.193787		3.30474	0.228882
	-11.0359	0.201416		3.3015	0.202942
	-11.0235	0.209045		3.29826	0.177002
	-11.0112	0.18158		3.29502	0.195312
	-10.9989	0.172424		3.29178	0.209045
	-10.9867	0.178528		3.28855	0.18158
	-10.9744	0.184631		3.28531	0.189209
	-10.9622	0.192261		3.28207	0.195312
	-10.95	0.175476		3.27884	0.18158
	-10.9378	0.178528		3.27561	0.157166
	-10.9256	0.163269		3.27237	0.135803
	-10.9135	0.196838		3.26914	0.0915527
	-10.9013	0.230408		3.26591	0.0808716
	-10.8892	0.25177		3.26268	0.10376
	-10.8771	0.234985		3.25945	0.0991821
	-10.8651	0.209045		3.25622	0.111389
	-10.853	0.216675		3.253	0.12207
	-10.841	0.213623		3.24977	0.1297
	-10.829	0.216675		3.24655	0.111389
	-10.817	0.234985		3.24332	0.114441
	-10.805	0.241089		3.2401	0.119019
	-10.7931	0.224304		3.23688	0.105286
	-10.7812	0.19989		3.23366	0.134277
	-10.7692	0.195312		3.23044	0.157166
	-10.7574	0.204468		3.22722	0.166321
	-10.7455	0.216675		3.224	0.151062
	-10.7336	0.219727		3.22078	0.141907
	-10.7218	0.216675		3.21757	0.132751
	-10.71	0.175476		3.21436	0.135803
	-10.6982	0.14801		3.21114	0.109863
	-10.6864	0.160217		3.20793	0.0900269
	-10.6746	0.172424		3.20472	0.0839233
	-10.6629	0.15564		3.20151	0.0686645
	-10.6512	0.128174		3.1983	0.0823975
	-10.6395	0.120544		3.1951	0.108337
	-10.6278	0.114441		3.19189	0.105286
	-10.6161	0.115967		3.18869	0.0793457
	-10.6044	0.1297		3.18549	0.0305176
	-10.5928	0.157166		3.18229	0.00153
	-10.5812	0.152588		3.17909	0.0350952
	-10.5696	0.164795		3.17589	0.0457764
	-10.558	0.14801		3.17269	0.0518799
	-10.5464	0.144958		3.1695	0.0274658
	-10.5348	0.154114		3.16631	0.0564575
	-10.5233	0.178528		3.16311	0.0961304
	-10.5117	0.184631		3.15992	0.0854492
	-10.5002	0.186157		3.15673	0.0839233
	-10.4887	0.167847		3.15355	0.088501
	-10.4772	0.184631		3.15036	0.0915527
	-10.4657	0.196838		3.14718	0.0564575
	-10.4542	0.186157		3.144	0.0640869
	-10.4428	0.195312		3.14082	0.0823975
	-10.4313	0.210571		3.13764	0.119019
	-10.4199	0.212097		3.13446	0.146484
	-10.4085	0.212097		3.13129	0.157166
	-10.3971	0.10376		3.12811	0.172424
	-10.3856	0.0305176		3.12494	0.175476
	-10.3743	0.0335693		3.12177	0.14801
	-10.3629	0.0366211		3.1186	0.151062
	-10.3515	0.0549316		3.11544	0.160217
	-10.3401	0.0854492		3.11227	0.175476
	-10.3288	0.132751		3.10911	0.157166
	-10.3174	0.164795		3.10595	0.14801
	-10.3061	0.161743		3.10279	0.175476
	-10.2948	0.178528		3.09964	0.193787
	-10.2835	0.161743		3.09648	0.189209
	-10.2721	0.166321		3.09333	0.189209
	-10.2608	0.164795		3.09018	0.184631
	-10.2496	0.175476		3.08703	0.184631
	-10.2383	0.172424		3.08389	0.154114
	-10.227	0.189209		3.08074	0.131226
	-10.2157	0.215149		3.0776	0.140381
	-10.2045	0.17395		3.07446	0.164795
	-10.1932	0.169373		3.07133	0.189209
	-10.182	0.161743		3.06819	0.205994
	-10.1707	0.125122		3.06506	0.234985
	-10.1595	0.123596		3.06193	0.234985
	-10.1483	0.154114		3.0588	0.212097
	-10.1371	0.183105		3.05567	0.215149
	-10.1259	0.183105		3.05255	0.212097
	-10.1147	0.163269		3.04943	0.213623
	-10.1035	0.178528		3.04631	0.216675
	-10.0923	0.18158		3.04319	0.198364
	-10.0811	0.187683		3.04008	0.163269
	-10.0699	0.196838		3.03697	0.161743
	-10.0588	0.19989		3.03386	0.158691
	-10.0476	0.196838		3.03075	0.183105
	-10.0365	0.205994		3.02765	0.205994
	-10.0253	0.209045		3.02455	0.169373
	-10.0142	0.20752		3.02145	0.144958
	-10.0031	0.205994		3.01835	0.143433
	-9.99196	0.190735		3.01526	0.169373
	-9.98085	0.15564		3.01216	0.202942
	-9.96975	0.138855		3.00908	0.210571
	-9.95865	0.144958		3.00599	0.177002
	-9.94756	0.140381		3.00291	0.169373
	-9.93648	0.114441		2.99982	0.184631
	-9.92541	0.117493		2.99675	0.167847
[truncated: 73,015 more rows]

## Sheet: Fig1E
	Fiber distance (mm)	Recording sites (mm)
	1.486	3.59
	0.286	3.9
	0.4	4.1
	0.571	4.05
	0.629	3.1
	0.8	3.2
	0.838	3.9
	0.895	2.84
	1.01	3.06
	1.143	3.02
	1.257	3.08
	0.495	2.82
	0.514	2.844
	1.067	2.77
	1.333	2.42
		2.4
		3.7
		3.1
		4.08
		3.931
		3.8
		3.38
		4.07
		2.69
		2.72
		3.96
		3.826
		4.674
		3.014
		3.278
		4.087
		3.83
		3.41
		3.217
		3.796
		4.072
		4.219
