# Supplementary material for: Sensory input-dependent gain modulation of the optokinetic nystagmus by mid-infrared stimulation in pigeons
Source: eLife. 2023 Feb 28;12:e78729. doi: 10.7554/eLife.78729 (PMC9977280; doi:10.7554/eLife.78729)
Supplement: Figure 2—figure supplement 1—source data 1. [file elife-78729-fig2-figsupp1-data1.xlsx]

## Sheet: Fig2-S1B
		TN				NT
			EOG (deg)				EOG (deg)
			2.9305				0.545162
			2.90569				0.545115
			2.88053				0.545067
			2.85513				0.545017
			2.82957				0.544966
			2.80394				0.544913
			2.77835				0.544859
			2.7529				0.544803
			2.72768				0.544746
			2.70282				0.544687
			2.67842				0.544628
			2.65459				0.544567
			2.63145				0.544505
			2.60911				0.544443
			2.5877				0.544379
			2.56728				0.544314
			2.54796				0.544249
			2.52979				0.544183
			2.51284				0.544116
			2.49716				0.544049
			2.48279				0.54398
			2.46978				0.543912
			2.45818				0.543843
			2.44801				0.543773
			2.43932				0.543703
			2.43211				0.543633
			2.42639				0.543562
			2.42217				0.543491
			2.41944				0.54342
			2.41816				0.543348
			2.41832				0.543277
			2.41992				0.543205
			2.42293				0.543133
			2.42737				0.543061
			2.43325				0.542989
			2.44058				0.542917
			2.44938				0.542846
			2.45963				0.542774
			2.47133				0.542702
			2.48445				0.54263
			2.49895				0.542558
			2.5148				0.542486
			2.53193				0.542415
			2.55029				0.542343
			2.56981				0.542272
			2.59043				0.542201
			2.61206				0.54213
			2.63465				0.542059
			2.65813				0.541988
			2.68241				0.541917
			2.70744				0.541847
			2.73312				0.541776
			2.75939				0.541706
			2.78615				0.541636
			2.81331				0.541566
			2.84079				0.541497
			2.86848				0.541427
			2.89628				0.541358
			2.92408				0.541289
			2.95175				0.54122
			2.97918				0.541151
			3.00623				0.541083
			3.0328				0.541014
			3.05875				0.540946
			3.08399				0.540878
			3.1084				0.54081
			3.1319				0.540742
			3.15437				0.540675
			3.17574				0.540608
			3.19593				0.54054
			3.21486				0.540473
			3.23246				0.540406
			3.24869				0.54034
			3.2635				0.540273
			3.27687				0.540207
			3.28879				0.540141
			3.29927				0.540074
			3.30834				0.540008
			3.31602				0.539943
			3.32238				0.539877
			3.32748				0.539811
			3.33142				0.539746
			3.33428				0.539681
			3.33617				0.539615
			3.33721				0.53955
			3.33751				0.539485
			3.33719				0.53942
			3.33637				0.539356
			3.33515				0.539291
			3.33366				0.539227
			3.33198				0.539162
			3.33021				0.539098
			3.32844				0.539034
			3.32675				0.53897
			3.32522				0.538906
			3.3239				0.538842
			3.32285				0.538778
			3.32209				0.538714
			3.32167				0.53865
			3.3216				0.538587
			3.3219				0.538523
			3.32259				0.53846
			3.32368				0.538397
			3.32518				0.538334
			3.32709				0.53827
			3.32943				0.538207
			3.33219				0.538144
			3.33538				0.538081
			3.33898				0.538019
			3.34299				0.537956
			3.34738				0.537893
			3.35216				0.537831
			3.3573				0.537768
			3.3628				0.537706
			3.36864				0.537643
			3.37481				0.537581
			3.38129				0.537518
			3.38807				0.537456
			3.39512				0.537394
			3.40241				0.537332
			3.40991				0.53727
			3.4176				0.537208
			3.42543				0.537146
			3.43336				0.537085
			3.44135				0.537023
			3.44934				0.536961
			3.45728				0.5369
			3.46512				0.536838
			3.47283				0.536777
			3.48035				0.536716
			3.48765				0.536655
			3.4947				0.536594
			3.50145				0.536533
			3.50789				0.536472
			3.51398				0.536412
			3.51972				0.536351
			3.5251				0.536291
			3.53011				0.536231
			3.53475				0.53617
			3.53901				0.536111
			3.54291				0.536051
			3.54644				0.535991
			3.54961				0.535932
			3.55244				0.535872
			3.55496				0.535813
			3.55717				0.535754
			3.55911				0.535695
			3.56079				0.535637
			3.56223				0.535578
			3.56344				0.53552
			3.56443				0.535462
			3.56519				0.535403
			3.56572				0.535346
			3.56601				0.535288
			3.56604				0.53523
			3.56578				0.535173
			3.56523				0.535115
			3.56435				0.535058
			3.56313				0.535001
			3.56152				0.534944
			3.55952				0.534887
			3.55708				0.53483
			3.55417				0.534774
			3.55078				0.534717
			3.54689				0.534661
			3.54247				0.534604
			3.53753				0.534548
			3.53206				0.534492
			3.52606				0.534436
			3.51956				0.53438
			3.51258				0.534324
			3.50513				0.534268
			3.49724				0.534213
			3.48895				0.534157
			3.48027				0.534101
			3.47123				0.534046
			3.46184				0.533991
			3.45215				0.533935
			3.44215				0.53388
			3.43189				0.533825
			3.4214				0.53377
			3.41068				0.533715
			3.39979				0.533661
			3.38873				0.533606
			3.37754				0.533551
			3.36625				0.533497
			3.35488				0.533442
			3.34346				0.533388
			3.33203				0.533334
			3.32062				0.53328
			3.30928				0.533226
			3.29803				0.533172
			3.28693				0.533118
			3.27602				0.533064
			3.26536				0.533011
			3.25497				0.532957
			3.2449				0.532904
			3.2352				0.532851
			3.2259				0.532798
			3.21703				0.532745
			3.20862				0.532692
			3.2007				0.532639
			3.19329				0.532587
			3.18642				0.532534
			3.1801				0.532482
			3.17437				0.53243
			3.16922				0.532377
			3.16468				0.532326
			3.16075				0.532274
			3.15744				0.532222
			3.15478				0.53217
			3.15275				0.532119
			3.15139				0.532068
			3.15069				0.532016
			3.15066				0.531965
			3.15132				0.531914
			3.15266				0.531864
			3.15468				0.531813
			3.15739				0.531763
			3.16077				0.531712
			3.16482				0.531662
			3.16952				0.531612
			3.17486				0.531562
			3.18083				0.531512
			3.18738				0.531463
			3.19452				0.531413
			3.20219				0.531364
			3.21039				0.531315
			3.21908				0.531265
			3.22822				0.531216
			3.2378				0.531168
			3.24777				0.531119
			3.25811				0.53107
			3.26879				0.531022
			3.27978				0.530974
			3.29105				0.530926
			3.30258				0.530878
			3.31432				0.53083
			3.32627				0.530782
			3.33839				0.530734
			3.35064				0.530687
			3.36301				0.530639
			3.37546				0.530592
			3.38795				0.530545
			3.40047				0.530498
			3.41297				0.530451
			3.42542				0.530404
			3.43778				0.530357
			3.45001				0.530311
			3.46206				0.530264
			3.4739				0.530218
			3.48549				0.530172
			3.49678				0.530126
			3.50772				0.53008
			3.51829				0.530034
			3.52843				0.529988
			3.5381				0.529942
			3.54726				0.529897
			3.55586				0.529851
			3.56386				0.529806
			3.57121				0.52976
			3.57787				0.529715
			3.5838				0.52967
			3.58898				0.529625
			3.59338				0.52958
			3.59699				0.529535
			3.59978				0.52949
			3.60175				0.529446
			3.6029				0.529401
			3.60322				0.529357
			3.60272				0.529312
			3.60139				0.529268
			3.59925				0.529224
			3.5963				0.52918
			3.59255				0.529136
			3.58802				0.529092
			3.58273				0.529048
			3.57671				0.529005
			3.56999				0.528961
			3.56262				0.528918
			3.55463				0.528874
			3.54609				0.528831
			3.53706				0.528788
			3.5276				0.528745
			3.51778				0.528703
			3.50768				0.52866
			3.49738				0.528617
			3.48695				0.528575
			3.47649				0.528533
			3.46608				0.528491
			3.4558				0.528449
			3.44573				0.528407
			3.43595				0.528365
			3.42655				0.528324
			3.4176				0.528282
			3.40917				0.528241
			3.40133				0.5282
			3.39415				0.528159
			3.38768				0.528119
			3.38197				0.528078
			3.37707				0.528038
			3.373				0.527997
			3.36982				0.527957
			3.36754				0.527917
			3.36618				0.527877
			3.36577				0.527837
			3.36631				0.527798
			3.36781				0.527758
			3.37025				0.527719
			3.37363				0.52768
			3.37791				0.527641
			3.38307				0.527601
			3.38906				0.527563
			3.39583				0.527524
			3.40335				0.527485
			3.41156				0.527446
			3.42043				0.527408
			3.42989				0.527369
			3.43992				0.527331
			3.45047				0.527293
			3.46149				0.527255
			3.47294				0.527217
			3.48475				0.527179
			3.49688				0.527141
			3.50927				0.527103
			3.52185				0.527065
			3.53455				0.527027
			3.54732				0.52699
			3.56009				0.526952
			3.57279				0.526915
			3.58535				0.526878
			3.59771				0.526841
			3.60981				0.526803
			3.62159				0.526766
			3.63298				0.526729
			3.64393				0.526692
			3.65437				0.526656
			3.66425				0.526619
			3.6735				0.526582
			3.68208				0.526546
			3.68991				0.526509
			3.69693				0.526473
			3.7031				0.526437
			3.70835				0.526401
			3.71264				0.526365
			3.71592				0.526329
			3.71815				0.526293
			3.7193				0.526257
			3.71934				0.526221
			3.71823				0.526186
			3.71597				0.52615
			3.71253				0.526115
			3.70791				0.52608
			3.70211				0.526045
			3.69513				0.52601
			3.68696				0.525975
			3.67763				0.52594
			3.66712				0.525905
			3.65546				0.525871
			3.64265				0.525836
			3.6287				0.525802
			3.61365				0.525768
			3.59749				0.525734
			3.58025				0.5257
			3.56196				0.525666
			3.54262				0.525632
			3.52227				0.525598
			3.50091				0.525565
			3.47859				0.525531
			3.45533				0.525498
			3.43116				0.525465
			3.40613				0.525432
			3.38028				0.525399
			3.35366				0.525366
			3.32632				0.525333
			3.29831				0.525301
			3.26971				0.525268
			3.24057				0.525236
			3.21098				0.525203
			3.18101				0.525171
			3.15075				0.525139
			3.12031				0.525107
			3.08977				0.525075
			3.05924				0.525044
			3.02883				0.525012
			2.99862				0.52498
			2.96874				0.524949
			2.93927				0.524918
			2.91033				0.524886
			2.88199				0.524855
			2.85435				0.524824
			2.82748				0.524793
			2.80145				0.524762
			2.77631				0.524731
			2.75213				0.524701
			2.72893				0.52467
			2.70678				0.52464
			2.68571				0.524609
			2.66576				0.524579
			2.647				0.524548
			2.62947				0.524518
			2.61322				0.524488
			2.5983				0.524458
			2.58477				0.524428
			2.57267				0.524398
			2.56205				0.524369
			2.55294				0.524339
			2.54538				0.524309
			2.53942				0.524279
			2.53508				0.52425
			2.53239				0.52422
			2.53138				0.524191
			2.53207				0.524162
			2.53447				0.524132
			2.53859				0.524103
			2.54442				0.524074
			2.55192				0.524045
			2.56105				0.524016
			2.57175				0.523987
			2.58393				0.523958
			2.59749				0.523929
			2.61233				0.5239
			2.62832				0.523872
			2.64534				0.523843
			2.66326				0.523814
			2.68195				0.523786
			2.70127				0.523758
			2.7211				0.523729
			2.74129				0.523701
			2.76173				0.523673
			2.78232				0.523645
			2.80298				0.523617
			2.82363				0.523589
			2.84424				0.523561
			2.86473				0.523533
			2.88505				0.523505
			2.90516				0.523478
			2.92499				0.52345
			2.94449				0.523423
			2.96359				0.523395
			2.98224				0.523368
			3.00039				0.523341
			3.01798				0.523314
			3.03497				0.523287
			3.05128				0.52326
			3.06687				0.523234
			3.08168				0.523207
			3.09567				0.523181
			3.10881				0.523154
			3.12106				0.523128
			3.13242				0.523102
			3.14289				0.523076
			3.15246				0.52305
			3.16115				0.523024
			3.16896				0.522998
			3.17593				0.522972
			3.18207				0.522947
			3.1874				0.522921
			3.19196				0.522896
			3.19577				0.52287
			3.1989				0.522845
			3.20136				0.52282
			3.20323				0.522794
			3.20453				0.522769
			3.20532				0.522744
			3.20564				0.522719
			3.20553				0.522694
			3.20502				0.522669
			3.20414				0.522645
			3.20291				0.52262
			3.20136				0.522595
			3.19951				0.52257
			3.19738				0.522546
			3.19502				0.522521
			3.19243				0.522497
			3.18968				0.522472
			3.18679				0.522448
			3.18381				0.522424
			3.18081				0.522399
			3.17785				0.522375
			3.17501				0.522351
			3.17237				0.522327
			3.17002				0.522303
			3.16805				0.522278
			3.16655				0.522254
			3.16559				0.52223
			3.16523				0.522207
			3.16553				0.522183
			3.16652				0.522159
			3.16819				0.522135
			3.17057				0.522111
			3.17364				0.522088
			3.17738				0.522064
			3.18177				0.522041
			3.18679				0.522017
			3.1924				0.521994
			3.19856				0.52197
			3.20526				0.521947
			3.21244				0.521924
			3.22007				0.521901
			3.22812				0.521878
			3.23654				0.521855
			3.24531				0.521832
			3.25438				0.521809
			3.26372				0.521786
			3.27329				0.521763
			3.28305				0.52174
			3.29295				0.521718
			3.30297				0.521695
			3.31307				0.521673
			3.32321				0.52165
			3.33336				0.521628
			3.3435				0.521606
			3.3536				0.521583
			3.36366				0.521561
			3.37364				0.521539
			3.38354				0.521517
			3.39333				0.521495
			3.40301				0.521474
			3.41255				0.521452
			3.42193				0.52143
			3.43113				0.521409
			3.44014				0.521387
			3.44892				0.521366
			3.45744				0.521344
			3.46568				0.521323
			3.4736				0.521302
			3.48117				0.52128
			3.48837				0.521259
			3.49517				0.521238
			3.50157				0.521217
			3.50755				0.521196
			3.51309				0.521175
			3.5182				0.521155
			3.52288				0.521134
			3.52711				0.521113
			3.5309				0.521093
			3.53425				0.521072
			3.53715				0.521052
			3.53961				0.521031
			3.54162				0.521011
			3.54318				0.520991
			3.54429				0.52097
			3.54496				0.52095
			3.54518				0.52093
			3.54497				0.52091
			3.54432				0.52089
			3.54324				0.52087
			3.54174				0.52085
			3.53983				0.52083
			3.5375				0.52081
			3.53479				0.52079
			3.53169				0.52077
			3.52823				0.52075
			3.52442				0.520731
			3.52029				0.520711
			3.51583				0.520691
			3.51108				0.520672
			3.50602				0.520652
			3.50069				0.520632
			3.49507				0.520613
			3.48919				0.520593
			3.48304				0.520574
			3.47665				0.520554
			3.47003				0.520535
			3.46318				0.520516
			3.45613				0.520496
			3.4489				0.520477
			3.44151				0.520458
			3.43397				0.520438
			3.42633				0.520419
			3.4186				0.5204
			3.41083				0.520381
			3.40305				0.520361
			3.39529				0.520342
			3.38761				0.520323
			3.38004				0.520304
			3.37262				0.520285
			3.3654				0.520266
			3.35843				0.520247
			3.35176				0.520228
			3.34541				0.520209
			3.33943				0.520191
			3.33385				0.520172
			3.3287				0.520153
			3.32402				0.520134
			3.31985				0.520116
			3.31622				0.520097
			3.31317				0.520079
			3.31073				0.52006
			3.30893				0.520042
			3.30781				0.520024
			3.30739				0.520005
			3.30771				0.519987
			3.30878				0.519969
			3.31063				0.519951
			3.31329				0.519933
			3.31674				0.519915
			3.321				0.519897
			3.32607				0.519879
			3.33192				0.519861
			3.33853				0.519844
			3.34589				0.519826
			3.35395				0.519808
			3.36268				0.519791
			3.37204				0.519773
			3.38196				0.519756
			3.3924				0.519738
			3.40329				0.519721
			3.41457				0.519704
			3.42614				0.519686
			3.43794				0.519669
			3.44988				0.519652
			3.46186				0.519634
			3.47379				0.519617
			3.48559				0.5196
			3.49717				0.519583
			3.50845				0.519566
			3.51936				0.519548
			3.52983				0.519531
			3.5398				0.519514
			3.54922				0.519497
			3.55804				0.51948
			3.56623				0.519463
			3.57373				0.519446
			3.58053				0.519429
			3.58659				0.519412
			3.59188				0.519395
			3.59638				0.519378
			3.60006				0.519361
			3.60291				0.519344
			3.60491				0.519327
			3.60603				0.51931
			3.60626				0.519293
			3.60557				0.519276
			3.60396				0.519259
			3.60142				0.519243
			3.59794				0.519226
			3.59352				0.519209
			3.5882				0.519192
			3.58198				0.519175
			3.57491				0.519158
			3.56701				0.519141
			3.55835				0.519125
			3.54896				0.519108
			3.53891				0.519091
			3.52825				0.519074
			3.51705				0.519058
			3.50537				0.519041
			3.49329				0.519024
			3.48087				0.519008
			3.4682				0.518991
			3.45535				0.518975
			3.44242				0.518958
			3.42949				0.518942
			3.41666				0.518925
			3.40402				0.518908
			3.39166				0.518892
			3.37968				0.518876
			3.36817				0.518859
			3.35722				0.518843
			3.34691				0.518826
			3.33734				0.51881
			3.32857				0.518794
			3.32068				0.518778
			3.31373				0.518761
			3.30779				0.518745
			3.30291				0.518729
			3.29913				0.518713
			3.29648				0.518697
			3.295				0.518681
			3.29468				0.518665
			3.29556				0.518649
			3.29761				0.518633
			3.30083				0.518617
			3.30519				0.518601
			3.31064				0.518585
			3.31715				0.518569
			3.32464				0.518553
			3.33307				0.518538
			3.34234				0.518522
			3.3524				0.518506
			3.36317				0.51849
			3.37456				0.518475
			3.3865				0.518459
			3.39891				0.518443
			3.41172				0.518428
			3.42486				0.518412
			3.43825				0.518397
			3.45182				0.518381
			3.46553				0.518366
			3.47929				0.51835
			3.49306				0.518335
			3.50678				0.518319
			3.52039				0.518304
			3.53385				0.518288
			3.54711				0.518273
			3.5601				0.518258
			3.57277				0.518242
			3.58508				0.518227
			3.59695				0.518211
			3.60835				0.518196
			3.6192				0.518181
			3.62947				0.518166
			3.6391				0.51815
			3.64804				0.518135
			3.65624				0.51812
			3.66366				0.518104
			3.67026				0.518089
			3.67599				0.518074
			3.68085				0.518059
			3.68479				0.518043
			3.68782				0.518028
			3.68992				0.518013
			3.69109				0.517998
			3.69133				0.517982
			3.69067				0.517967
			3.68911				0.517952
			3.68669				0.517937
			3.68343				0.517922
			3.67936				0.517907
			3.67453				0.517891
			3.66895				0.517876
			3.66268				0.517861
			3.65574				0.517846
			3.64817				0.517831
			3.64001				0.517816
			3.63129				0.517801
			3.62206				0.517786
			3.61236				0.517771
			3.60223				0.517756
			3.59171				0.517741
			3.58085				0.517726
			3.56969				0.517712
			3.55829				0.517697
			3.54668				0.517682
			3.53493				0.517667
			3.52309				0.517653
			3.51123				0.517638
			3.4994				0.517623
			3.48767				0.517609
			3.4761				0.517594
			3.46475				0.51758
			3.45367				0.517566
			3.44293				0.517551
			3.43258				0.517537
			3.42266				0.517523
			3.41323				0.517509
			3.40432				0.517495
			3.39597				0.517481
			3.38821				0.517467
			3.38103				0.517453
			3.37447				0.517439
			3.36852				0.517425
			3.36317				0.517411
			3.35843				0.517397
			3.35428				0.517384
			3.35069				0.51737
			3.34766				0.517356
			3.34517				0.517343
			3.3432				0.517329
			3.34173				0.517316
			3.34076				0.517302
			3.34028				0.517289
			3.3403				0.517276
			3.34083				0.517262
			3.34189				0.517249
			3.34349				0.517236
			3.34567				0.517223
			3.34843				0.517209
			3.35178				0.517196
			3.35574				0.517183
			3.36031				0.51717
			3.36547				0.517157
			3.37123				0.517144
			3.37754				0.517131
			3.38438				0.517118
			3.39169				0.517105
			3.39944				0.517092
			3.40755				0.517079
			3.41596				0.517067
			3.4246				0.517054
			3.43339				0.517041
			3.44228				0.517028
			3.45116				0.517016
			3.45997				0.517003
			3.46862				0.51699
			3.47701				0.516978
			3.48507				0.516965
			3.49271				0.516953
			3.49984				0.516941
			3.50639				0.516928
			3.51229				0.516916
			3.51747				0.516904
			3.52188				0.516891
			3.52546				0.516879
			3.52816				0.516867
			3.52995				0.516855
			3.53081				0.516843
			3.5307				0.516831
			3.52962				0.516819
			3.52757				0.516807
			3.52453				0.516796
			3.52052				0.516784
			3.51555				0.516772
			3.50962				0.516761
			3.50275				0.516749
			3.49495				0.516738
			3.48623				0.516726
			3.47662				0.516715
			3.46612				0.516704
			3.45476				0.516693
			3.44256				0.516682
			3.42955				0.51667
			3.41575				0.51666
			3.4012				0.516649
			3.38594				0.516638
			3.37				0.516627
			3.35345				0.516616
			3.33632				0.516606
			3.31869				0.516595
			3.30059				0.516585
			3.28209				0.516575
			3.26327				0.516564
			3.24418				0.516554
			3.22491				0.516544
			3.20553				0.516534
			3.18614				0.516524
			3.16681				0.516514
			3.14764				0.516505
			3.1287				0.516495
			3.1101				0.516485
			3.09192				0.516476
			3.07427				0.516466
			3.05722				0.516457
			3.04088				0.516448
			3.02533				0.516438
			3.01065				0.516429
			2.9969				0.51642
			2.98414				0.516411
			2.97239				0.516402
			2.96167				0.516394
			2.95198				0.516385
			2.94331				0.516376
			2.93562				0.516368
			2.92888				0.516359
			2.92301				0.516351
			2.91795				0.516343
			2.91361				0.516334
			2.90993				0.516326
			2.90683				0.516318
			2.90424				0.51631
			2.9021				0.516302
			2.90037				0.516294
			2.89901				0.516287
			2.89799				0.516279
			2.89728				0.516271
			2.89689				0.516264
			2.89679				0.516257
			2.897				0.516249
			2.89752				0.516242
			2.89835				0.516235
			2.89952				0.516228
			2.90102				0.516221
			2.90287				0.516214
			2.90506				0.516207
			2.90758				0.5162
			2.9104				0.516194
			2.91351				0.516187
			2.91688				0.51618
			2.92048				0.516174
			2.92427				0.516168
			2.92823				0.516162
			2.93233				0.516155
			2.93655				0.516149
			2.94085				0.516143
			2.9452				0.516138
			2.94959				0.516132
			2.95397				0.516126
			2.95832				0.516121
			2.96259				0.516115
			2.96678				0.51611
			2.97085				0.516105
			2.97483				0.5161
			2.97872				0.516095
			2.98255				0.51609
			2.98632				0.516086
			2.99004				0.516081
			2.99373				0.516077
			2.99737				0.516072
			3.00096				0.516068
			3.00448				0.516064
			3.00793				0.51606
			3.01127				0.516056
			3.01448				0.516053
			3.01755				0.516049
			3.02044				0.516046
			3.02315				0.516042
			3.02566				0.516039
			3.02797				0.516036
			3.0301				0.516033
			3.03205				0.516031
			3.03384				0.516028
			3.0355				0.516025
			3.03706				0.516023
			3.03852				0.516021
			3.03993				0.516019
			3.0413				0.516017
			3.04266				0.516015
			3.04403				0.516013
			3.04544				0.516012
			3.0469				0.51601
			3.04843				0.516009
			3.05005				0.516008
			3.05178				0.516007
			3.05364				0.516006
			3.05563				0.516005
			3.05774				0.516004
			3.05997				0.516004
			3.0623				0.516003
			3.06473				0.516003
			3.06725				0.516003
			3.06986				0.516003
			3.07257				0.516003
			3.07539				0.516003
			3.07836				0.516003
			3.0815				0.516004
			3.08483				0.516004
			3.0884				0.516005
			3.09225				0.516006
			3.09641				0.516007
			3.10094				0.516008
			3.10587				0.516009
			3.11127				0.51601
			3.11719				0.516012
			3.12368				0.516013
			3.13081				0.516015
			3.13864				0.516017
			3.14723				0.516019
			3.15665				0.516021
			3.16694				0.516023
			3.17815				0.516025
			3.19033				0.516028
			3.20352				0.51603
			3.21774				0.516033
			3.23302				0.516036
			3.24937				0.516039
			3.26678				0.516042
			3.28526				0.516046
			3.30478				0.516049
			3.32531				0.516053
			3.34681				0.516057
			3.36922				0.516061
			3.39247				0.516065
			3.4165				0.516069
			3.44121				0.516073
			3.46651				0.516078
			3.4923				0.516082
			3.51845				0.516087
			3.54485				0.516092
			3.57137				0.516098
			3.59789				0.516103
			3.62428				0.516108
			3.65042				0.516114
			3.67623				0.51612
			3.70159				0.516126
			3.72643				0.516132
			3.75067				0.516138
			3.77425				0.516145
			3.79712				0.516151
			3.81922				0.516158
			3.84052				0.516165
			3.86098				0.516172
			3.88056				0.51618
			3.89924				0.516187
			3.91697				0.516195
			3.93372				0.516203
			3.94945				0.516211
			3.96414				0.516219
			3.97775				0.516227
			3.99027				0.516236
			4.00168				0.516244
			4.01194				0.516253
			4.02107				0.516262
			4.02903				0.516271
			4.03583				0.516281
			4.04145				0.51629
			4.0459				0.5163
			4.04917				0.51631
			4.05126				0.51632
			4.05217				0.51633
			4.05192				0.51634
			4.05052				0.516351
			4.04801				0.516362
			4.04443				0.516373
			4.03982				0.516384
			4.03423				0.516395
			4.02773				0.516406
			4.02038				0.516418
			4.01222				0.516429
			4.00334				0.516441
			3.99377				0.516453
			3.98359				0.516466
			3.97284				0.516478
			3.96156				0.516491
			3.9498				0.516503
			3.93759				0.516516
			3.92496				0.516529
			3.91194				0.516543
			3.89855				0.516556
			3.88482				0.51657
			3.87077				0.516583
			3.85641				0.516597
			3.84175				0.516611
			3.82681				0.516626
			3.81162				0.51664
			3.79619				0.516655
			3.78056				0.51667
			3.76476				0.516684
			3.74882				0.5167
			3.73278				0.516715
			3.71669				0.51673
			3.70059				0.516746
			3.68452				0.516762
			3.66851				0.516778
			3.6526				0.516794
			3.63683				0.516811
			3.62122				0.516827
			3.60579				0.516844
			3.59057				0.516861
			3.57556				0.516878
			3.56079				0.516895
			3.54626				0.516913
			3.53198				0.516931
			3.51795				0.516949
			3.50419				0.516967
			3.4907				0.516985
			3.4775				0.517004
			3.4646				0.517022
			3.45201				0.517041
			3.43975				0.51706
			3.42783				0.51708
			3.41627				0.517099
			3.40508				0.517119
			3.39429				0.517139
			3.38392				0.517159
			3.37396				0.51718
			3.36445				0.5172
			3.35537				0.517221
			3.34674				0.517242
			3.33856				0.517263
			3.33081				0.517285
			3.3235				0.517306
			3.31661				0.517328
			3.31014				0.51735
			3.30406				0.517373
			3.29836				0.517395
			3.29302				0.517418
			3.288				0.517441
			3.28328				0.517464
			3.27882				0.517487
			3.27459				0.517511
			3.27054				0.517534
			3.26664				0.517558
			3.26284				0.517582
			3.2591				0.517607
			3.25539				0.517631
			3.25166				0.517656
			3.24787				0.517681
			3.24397				0.517706
			3.23992				0.517731
			3.23566				0.517757
			3.23116				0.517783
			3.22635				0.517808
			3.22118				0.517835
			3.21561				0.517861
			3.20957				0.517887
			3.20302				0.517914
			3.19591				0.517941
			3.1882				0.517968
			3.17986				0.517996
			3.17083				0.518023
			3.16109				0.518051
			3.15062				0.518079
			3.13939				0.518107
			3.12737				0.518135
			3.11458				0.518164
			3.101				0.518193
			3.08666				0.518221
			3.07159				0.518251
			3.05582				0.51828
			3.03941				0.51831
			3.02242				0.518339
			3.00493				0.518369
			2.98701				0.5184
			2.96873				0.51843
			2.95019				0.518461
			2.93145				0.518491
			2.9126				0.518522
			2.89373				0.518554
			2.87492				0.518585
			2.85624				0.518617
			2.8378				0.518649
			2.81966				0.518681
			2.80191				0.518713
			2.78463				0.518746
			2.76791				0.518779
			2.7518				0.518812
			2.7364				0.518845
			2.72177				0.518878
			2.70796				0.518912
			2.69505				0.518946
			2.68311				0.51898
			2.67218				0.519015
			2.66233				0.519049
			2.65362				0.519084
			2.64612				0.519119
			2.63986				0.519154
			2.63491				0.51919
			2.63132				0.519225
			2.62912				0.519261
			2.62836				0.519298
			2.62906				0.519334
			2.63124				0.519371
			2.63493				0.519408
			2.64013				0.519445
			2.64682				0.519482
			2.655				0.519519
			2.66464				0.519557
			2.67572				0.519595
			2.68819				0.519633
			2.70199				0.519672
			2.71706				0.51971
			2.73335				0.519749
			2.75077				0.519788
			2.76924				0.519828
			2.7887				0.519867
			2.80904				0.519907
			2.83021				0.519947
			2.8521				0.519987
			2.87466				0.520028
			2.8978				0.520069
			2.92146				0.520109
			2.94557				0.520151
			2.97008				0.520192
			2.99493				0.520233
			3.02009				0.520275
			3.0455				0.520317
			3.07112				0.520359
			3.09691				0.520402
			3.12281				0.520444
			3.14876				0.520487
			3.17472				0.52053
			3.20062				0.520574
			3.2264				0.520617
			3.25198				0.520661
			3.2773				0.520705
			3.30228				0.520749
			3.32685				0.520793
			3.35093				0.520838
			3.37445				0.520883
			3.39732				0.520928
			3.41947				0.520973
			3.44084				0.521018
			3.46135				0.521064
			3.48095				0.52111
			3.49958				0.521156
			3.51719				0.521202
			3.53375				0.521248
			3.54923				0.521295
			3.5636				0.521342
			3.57685				0.521389
			3.58898				0.521436
			3.59998				0.521484
			3.60986				0.521532
			3.61862				0.52158
			3.62629				0.521628
			3.63289				0.521676
			3.63844				0.521725
			3.64296				0.521774
			3.64649				0.521823
			3.64905				0.521872
			3.65067				0.521922
			3.65138				0.521971
			3.6512				0.522021
			3.65016				0.522071
			3.64829				0.522122
			3.64561				0.522172
			3.64215				0.522223
			3.63794				0.522274
			3.633				0.522326
			3.62737				0.522377
			3.6211				0.522429
			3.61421				0.522481
			3.60676				0.522533
			3.59879				0.522586
			3.59034				0.522638
			3.58147				0.522691
			3.57221				0.522744
			3.56261				0.522798
			3.55271				0.522851
			3.54255				0.522905
			3.53217				0.522959
			3.5216				0.523013
			3.51087				0.523068
			3.50002				0.523122
			3.48908				0.523177
			3.47808				0.523232
			3.46705				0.523288
			3.45603				0.523343
			3.44504				0.523399
			3.43413				0.523455
			3.42331				0.523511
			3.41263				0.523567
			3.4021				0.523624
			3.39177				0.523681
			3.38164				0.523738
			3.37174				0.523795
			3.3621				0.523853
			3.35273				0.52391
			3.34364				0.523968
			3.33484				0.524026
			3.32634				0.524085
			3.31813				0.524143
			3.3102				0.524202
			3.30253				0.524261
			3.29509				0.52432
			3.28786				0.524379
			3.2808				0.524439
			3.27386				0.524498
			3.267				0.524558
			3.26019				0.524619
			3.25336				0.524679
			3.24648				0.524739
			3.23951				0.5248
			3.23241				0.524861
			3.22514				0.524922
			3.21768				0.524984
			3.21				0.525045
			3.20207				0.525107
			3.19386				0.525169
			3.18537				0.525231
			3.17658				0.525294
			3.16746				0.525356
			3.15801				0.525419
			3.14822				0.525482
			3.13809				0.525545
			3.12761				0.525609
			3.11679				0.525672
			3.10566				0.525736
			3.09422				0.5258
			3.08251				0.525864
			3.07056				0.525929
			3.05838				0.525993
			3.04602				0.526058
			3.03351				0.526123
			3.02088				0.526189
			3.00817				0.526254
			2.99542				0.52632
			2.98268				0.526386
			2.96998				0.526452
			2.95736				0.526518
			2.94489				0.526585
			2.9326				0.526652
			2.92054				0.526719
			2.90875				0.526786
			2.89725				0.526853
			2.88606				0.526921
			2.87518				0.526989
			2.86461				0.527057
			2.85433				0.527125
			2.84434				0.527193
			2.83462				0.527262
			2.82515				0.527331
			2.81591				0.5274
			2.8069				0.527469
			2.79811				0.527539
			2.78952				0.527608
			2.78114				0.527678
			2.77299				0.527748
			2.76508				0.527818
			2.75743				0.527889
			2.75007				0.52796
			2.74304				0.52803
			2.73637				0.528102
			2.73007				0.528173
			2.72416				0.528244
			2.71864				0.528316
			2.7135				0.528388
			2.70874				0.52846
			2.7043				0.528532
			2.70017				0.528604
			2.69627				0.528677
			2.69256				0.52875
			2.68895				0.528823
			2.68536				0.528896
			2.6817				0.52897
			2.67789				0.529043
			2.67383				0.529117
			2.66946				0.529191
			2.66472				0.529265
			2.65957				0.529339
			2.65397				0.529414
			2.64792				0.529488
			2.64142				0.529563
			2.63448				0.529638
			2.62713				0.529713
			2.61943				0.529789
			2.61141				0.529864
			2.60315				0.52994
			2.59472				0.530016
			2.58619				0.530092
			2.57763				0.530168
			2.5691				0.530245
			2.56066				0.530321
			2.55235				0.530398
			2.5442				0.530475
			2.53623				0.530552
			2.52844				0.530629
			2.52085				0.530707
			2.51345				0.530784
			2.50623				0.530862
			2.49918				0.53094
			2.49229				0.531018
			2.48555				0.531096
			2.47896				0.531175
			2.47251				0.531253
			2.46621				0.531332
			2.46009				0.531411
			2.45419				0.53149
			2.44857				0.531569
			2.44327				0.531649
			2.43839				0.531729
			2.434				0.531808
			2.43017				0.531888
			2.42699				0.531969
			2.42451				0.532049
			2.4228				0.532129
			2.4219				0.53221
			2.42182				0.532291
			2.42258				0.532372
			2.42417				0.532453
			2.42659				0.532534
			2.4298				0.532616
			2.43376				0.532697
			2.43842				0.532779
			2.44373				0.532861
			2.44964				0.532943
			2.45611				0.533026
			2.4631				0.533108
			2.47055				0.533191
			2.47845				0.533274
			2.48676				0.533357
			2.49544				0.53344
			2.50445				0.533523
			2.51376				0.533606
			2.52331				0.53369
			2.53308				0.533774
			2.54301				0.533858
			2.55306				0.533942
			2.5632				0.534026
			2.5734				0.53411
			2.58361				0.534195
			2.59382				0.534279
			2.60399				0.534364
			2.61411				0.534449
			2.62415				0.534534
			2.63409				0.534619
			2.6439				0.534705
			2.65358				0.53479
			2.66311				0.534876
			2.67249				0.534961
			2.68172				0.535047
			2.69081				0.535133
			2.69975				0.535219
			2.70854				0.535306
			2.71718				0.535392
			2.72566				0.535479
			2.73398				0.535565
			2.74214				0.535652
			2.75012				0.535739
			2.75792				0.535826
			2.76552				0.535913
			2.77291				0.536
			2.78008				0.536088
			2.78703				0.536175
			2.79374				0.536263
			2.80021				0.53635
			2.80644				0.536438
			2.81244				0.536526
			2.81821				0.536614
			2.82378				0.536703
			2.82916				0.536791
			2.83437				0.536879
			2.83943				0.536968
			2.84437				0.537057
			2.8492				0.537145
			2.85395				0.537234
			2.85864				0.537323
			2.86329				0.537413
			2.86792				0.537502
			2.87256				0.537591
			2.87722				0.537681
			2.88192				0.53777
			2.88667				0.53786
			2.89149				0.53795
			2.89637				0.53804
			2.90132				0.53813
			2.90635				0.53822
			2.91146				0.53831
			2.91665				0.5384
			2.92193				0.538491
			2.9273				0.538581
			2.93278				0.538672
			2.93838				0.538763
			2.94411				0.538854
			2.95				0.538945
			2.95607				0.539036
			2.96233				0.539127
			2.9688				0.539218
			2.97551				0.53931
			2.98245				0.539401
			2.98964				0.539493
			2.99708				0.539584
			3.00477				0.539676
			3.0127				0.539768
			3.02087				0.53986
			3.02926				0.539952
			3.03785				0.540044
			3.04664				0.540136
			3.05559				0.540229
			3.06469				0.540321
			3.0739				0.540414
			3.08318				0.540506
			3.09252				0.540599
			3.10187				0.540691
			3.11121				0.540784
			3.12048				0.540877
			3.12968				0.54097
			3.13875				0.541063
			3.14769				0.541156
			3.15647				0.541249
			3.1651				0.541343
			3.17355				0.541436
			3.18184				0.541529
			3.18997				0.541623
			3.19794				0.541716
			3.20577				0.54181
			3.21347				0.541903
			3.22105				0.541997
			3.22853				0.542091
			3.23592				0.542185
			3.24323				0.542278
			3.25045				0.542372
			3.25759				0.542466
			3.26464				0.54256
			3.27158				0.542654
			3.27839				0.542748
			3.28506				0.542843
			3.29155				0.542937
			3.29784				0.543031
			3.30388				0.543125
			3.30966				0.543219
			3.31514				0.543314
			3.32029				0.543408
			3.3251				0.543503
			3.32956				0.543597
			3.33367				0.543692
			3.33745				0.543786
			3.34091				0.543881
			3.34407				0.543975
			3.34698				0.54407
			3.34965				0.544165
			3.35214				0.544259
			3.35445				0.544354
			3.35661				0.544449
			3.35865				0.544544
			3.36056				0.544639
			3.36236				0.544733
			3.36402				0.544828
			3.36553				0.544923
			3.36686				0.545018
			3.368				0.545113
			3.36889				0.545208
			3.36951				0.545303
			3.36983				0.545398
			3.36979				0.545493
			3.36938				0.545588
			3.36856				0.545683
			3.3673				0.545779
			3.36559				0.545874
			3.36341				0.545969
			3.36075				0.546064
			3.35762				0.546159
			3.35401				0.546254
			3.34993				0.54635
			3.3454				0.546445
			3.34042				0.54654
			3.33501				0.546636
			3.32918				0.546731
			3.32294				0.546826
			3.3163				0.546921
			3.30927				0.547017
			3.30187				0.547112
			3.29411				0.547207
			3.286				0.547303
			3.27755				0.547398
			3.26877				0.547493
			3.25966				0.547588
			3.25022				0.547684
			3.24045				0.547779
			3.23035				0.547874
			3.21994				0.547969
			3.20921				0.548065
			3.19819				0.54816
			3.1869				0.548255
			3.17538				0.54835
			3.16365				0.548445
			3.15176				0.548541
			3.13977				0.548636
			3.12772				0.548731
			3.11566				0.548826
			3.10365				0.548921
			3.09172				0.549016
			3.07992				0.549111
			3.06829				0.549206
			3.05686				0.549301
			3.04566				0.549395
			3.0347				0.54949
			3.02401				0.549585
			3.0136				0.54968
			3.00347				0.549774
			2.99363				0.549869
			2.98408				0.549963
			2.97483				0.550058
			2.96587				0.550153
			2.95719				0.550247
			2.94879				0.550341
			2.94068				0.550436
			2.93286				0.55053
			2.92534				0.550624
			2.91813				0.550718
			2.91124				0.550812
			2.9047				0.550906
			2.89851				0.551001
			2.89268				0.551094
			2.88724				0.551188
			2.88217				0.551282
			2.87749				0.551376
			2.87319				0.55147
			2.86929				0.551563
			2.86576				0.551657
			2.86261				0.55175
			2.85981				0.551844
			2.85736				0.551937
			2.85522				0.55203
			2.85337				0.552124
			2.85176				0.552217
			2.85035				0.55231
			2.84909				0.552403
			2.84793				0.552496
			2.84681				0.552589
			2.8457				0.552682
			2.84454				0.552774
			2.84329				0.552867
			2.84192				0.55296
			2.84041				0.553052
			2.83875				0.553144
			2.83693				0.553237
			2.83497				0.553329
			2.83288				0.553421
			2.83068				0.553513
			2.8284				0.553605
			2.82608				0.553697
			2.82373				0.553789
			2.8214				0.553881
			2.8191				0.553972
			2.81686				0.554064
			2.81469				0.554155
			2.81262				0.554247
			2.81064				0.554338
			2.80875				0.554429
			2.80695				0.55452
			2.80523				0.554611
			2.80358				0.554702
			2.80197				0.554793
			2.80039				0.554883
			2.79882				0.554974
			2.79724				0.555064
			2.79563				0.555155
			2.79396				0.555245
			2.79221				0.555335
			2.79038				0.555425
			2.78843				0.555515
			2.78637				0.555604
			2.78418				0.555694
			2.78185				0.555783
			2.77938				0.555873
			2.77676				0.555962
			2.77397				0.556051
			2.77101				0.55614
			2.76787				0.556229
			2.76453				0.556318
			2.76098				0.556406
			2.75723				0.556495
			2.75326				0.556583
			2.74907				0.556671
			2.74465				0.556759
			2.74				0.556847
			2.73511				0.556935
			2.72997				0.557023
			2.72457				0.55711
			2.7189				0.557197
			2.71296				0.557285
			2.70676				0.557372
			2.70029				0.557458
			2.69356				0.557545
			2.6866				0.557632
			2.67943				0.557718
			2.67207				0.557805
			2.66454				0.557891
			2.65686				0.557977
			2.64906				0.558063
			2.64113				0.558148
			2.6331				0.558234
			2.62498				0.558319
			2.61676				0.558404
			2.60847				0.558489
			2.60011				0.558574
			2.59171				0.558659
			2.58327				0.558744
			2.57483				0.558828
			2.56642				0.558912
			2.55806				0.558996
			2.54979				0.55908
			2.54164				0.559164
			2.53364				0.559248
			2.5258				0.559331
			2.51815				0.559415
			2.51072				0.559498
			2.50352				0.559581
			2.49657				0.559663
			2.4899				0.559746
			2.48351				0.559829
			2.47743				0.559911
			2.47167				0.559993
			2.46624				0.560075
			2.46115				0.560157
			2.45641				0.560238
			2.45203				0.56032
			2.448				0.560401
			2.44432				0.560482
			2.44101				0.560563
			2.43804				0.560644
			2.43541				0.560725
			2.43311				0.560805
			2.43111				0.560885
			2.42941				0.560965
			2.42797				0.561045
			2.42679				0.561125
			2.42585				0.561204
			2.42513				0.561284
			2.42464				0.561363
			2.42435				0.561442
			2.42428				0.56152
			2.42441				0.561599
			2.42474				0.561677
			2.42527				0.561755
			2.42599				0.561833
			2.42689				0.561911
			2.42796				0.561989
			2.42919				0.562066
			2.43057				0.562143
			2.4321				0.56222
			2.43375				0.562297
			2.43553				0.562374
			2.43741				0.56245
			2.43938				0.562526
			2.44144				0.562602
			2.44356				0.562678
			2.44575				0.562754
			2.44799				0.562829
			2.45027				0.562904
			2.45259				0.562979
			2.45495				0.563054
			2.45734				0.563128
			2.45975				0.563203
			2.46217				0.563277
			2.46458				0.563351
			2.46695				0.563424
			2.46926				0.563498
			2.47146				0.563571
			2.47349				0.563644
			2.4753				0.563717
			2.47684				0.56379
			2.47804				0.563862
			2.47886				0.563935
			2.47926				0.564007
			2.47922				0.564079
			2.4787				0.56415
			2.47771				0.564222
			2.47622				0.564293
			2.47424				0.564364
			2.47176				0.564435
			2.46879				0.564505
			2.46533				0.564576
			2.46141				0.564646
			2.45702				0.564716
			2.45219				0.564785
			2.44695				0.564855
			2.44131				0.564924
			2.4353				0.564994
			2.42896				0.565062
			2.42232				0.565131
			2.41538				0.5652
			2.40817				0.565268
			2.4007				0.565336
			2.39295				0.565404
			2.38493				0.565472
			2.3766				0.565539
			2.36796				0.565606
			2.35896				0.565673
			2.34959				0.56574
			2.33982				0.565807
			2.32963				0.565873
			2.31901				0.565939
			2.30796				0.566005
			2.29648				0.566071
			2.2846				0.566137
			2.27236				0.566202
			2.2598				0.566267
			2.24701				0.566332
			2.23407				0.566397
			2.22105				0.566461
			2.20808				0.566525
			2.19523				0.566589
			2.18259				0.566653
			2.17026				0.566717
			2.15829				0.56678
			2.14676				0.566844
			2.13573				0.566907
			2.12523				0.566969
			2.11532				0.567032
			2.10601				0.567094
			2.09733				0.567156
			2.08927				0.567218
			2.08185				0.56728
			2.07506				0.567341
			2.06892				0.567402
			2.06343				0.567463
			2.05863				0.567524
			2.05453				0.567585
			2.05116				0.567645
			2.04856				0.567705
			2.04675				0.567765
			2.04577				0.567824
			2.04564				0.567884
			2.04638				0.567943
			2.048				0.568002
			2.05053				0.568061
			2.05397				0.568119
			2.05833				0.568178
			2.06363				0.568236
			2.06984				0.568293
			2.07697				0.568351
			2.08499				0.568408
			2.09384				0.568466
			2.10348				0.568522
			2.11384				0.568579
			2.12486				0.568636
			2.13645				0.568692
			2.14853				0.568748
			2.16105				0.568804
			2.17391				0.568859
			2.18707				0.568915
			2.20046				0.56897
			2.21404				0.569025
			2.22778				0.569079
			2.24164				0.569134
			2.2556				0.569188
			2.26965				0.569242
			2.28378				0.569296
			2.298				0.569349
			2.3123				0.569403
			2.32669				0.569456
			2.34118				0.569509
			2.35576				0.569561
			2.37045				0.569614
			2.38522				0.569666
			2.40006				0.569718
			2.41494				0.56977
			2.42981				0.569821
			2.44465				0.569873
			2.4594				0.569924
			2.47403				0.569975
			2.4885				0.570025
			2.50278				0.570076
			2.51684				0.570126
			2.53067				0.570176
			2.54425				0.570226
			2.5576				0.570276
			2.5707				0.570325
			2.58355				0.570374
			2.59616				0.570423
			2.60853				0.570472
			2.62066				0.57052
			2.63255				0.570569
			2.64421				0.570617
			2.65562				0.570665
			2.66678				0.570712
			2.67769				0.57076
			2.68835				0.570807
			2.69876				0.570854
			2.70891				0.570901
			2.71883				0.570947
			2.7285				0.570993
			2.73795				0.57104
			2.74719				0.571085
			2.75622				0.571131
			2.76506				0.571176
			2.77372				0.571222
			2.78221				0.571267
			2.79053				0.571311
			2.79869				0.571356
			2.80669				0.5714
			2.8145				0.571444
			2.82214				0.571488
			2.82957				0.571532
			2.83679				0.571575
			2.84378				0.571618
			2.85052				0.571661
			2.857				0.571704
			2.8632				0.571747
			2.86911				0.571789
			2.87472				0.571831
			2.88001				0.571873
			2.88497				0.571915
			2.88961				0.571956
			2.89391				0.571997
			2.89787				0.572038
			2.90151				0.572079
			2.90482				0.57212
			2.90784				0.57216
			2.91057				0.5722
			2.91303				0.57224
			2.91524				0.57228
			2.91722				0.572319
			2.91895				0.572358
			2.92044				0.572397
			2.92168				0.572436
			2.92266				0.572475
			2.92334				0.572513
			2.92371				0.572551
			2.92375				0.572589
			2.92343				0.572627
			2.92273				0.572665
			2.92163				0.572702
			2.9201				0.572739
			2.91812				0.572776
			2.91567				0.572813
			2.91272				0.57285
			2.90927				0.572886
			2.90529				0.572922
			2.90078				0.572958
			2.89575				0.572994
			2.8902				0.573029
			2.88413				0.573064
			2.87757				0.573099
			2.87052				0.573134
			2.86299				0.573169
			2.85499				0.573203
			2.84655				0.573238
			2.83766				0.573272
			2.82834				0.573306
			2.81861				0.573339
			2.80845				0.573373
			2.79789				0.573406
			2.78691				0.573439
			2.77551				0.573472
			2.7637				0.573505
			2.75145				0.573537
			2.73878				0.573569
			2.72569				0.573601
			2.71218				0.573633
			2.69827				0.573665
			2.68399				0.573696
			2.66934				0.573728
			2.65436				0.573759
			2.63906				0.57379
			2.62347				0.57382
			2.6076				0.573851
			2.5915				0.573881
			2.57519				0.573911
			2.55872				0.573941
			2.5421				0.57397
			2.52539				0.574
			2.50863				0.574029
			2.49184				0.574058
			2.47506				0.574087
			2.45833				0.574116
			2.44168				0.574144
			2.42515				0.574173
			2.40875				0.574201
			2.39253				0.574229
			2.37651				0.574256
			2.36073				0.574284
			2.34521				0.574311
			2.32998				0.574338
			2.31507				0.574365
			2.3005				0.574392
			2.28629				0.574418
			2.27244				0.574445
			2.25898				0.574471
			2.24591				0.574497
			2.23323				0.574523
			2.22097				0.574548
			2.20912				0.574574
			2.19772				0.574599
			2.18677				0.574624
			2.17629				0.574649
			2.16629				0.574673
			2.1568				0.574698
			2.14781				0.574722
			2.13935				0.574746
			2.13142				0.57477
			2.12401				0.574794
			2.11713				0.574817
			2.11077				0.57484
			2.1049				0.574864
			2.09952				0.574887
			2.0946				0.574909
			2.09011				0.574932
			2.08601				0.574954
			2.08229				0.574977
			2.07891				0.574999
			2.07584				0.575021
			2.07307				0.575042
			2.07056				0.575064
			2.06831				0.575085
			2.06628				0.575107
			2.06446				0.575128
			2.06284				0.575148
			2.06141				0.575169
			2.06014				0.57519
			2.05905				0.57521
			2.0581				0.57523
			2.0573				0.57525
			2.05663				0.57527
			2.05607				0.57529
			2.05561				0.57531
			2.05521				0.575329
			2.05487				0.575348
			2.05455				0.575367
			2.05425				0.575386
			2.05393				0.575405
			2.05359				0.575423
			2.0532				0.575442
			2.05274				0.57546
			2.0522				0.575478
			2.05156				0.575496
			2.0508				0.575514
			2.04993				0.575532
			2.04893				0.575549
			2.0478				0.575566
			2.04656				0.575583
			2.04522				0.5756
			2.0438				0.575617
			2.04233				0.575634
			2.04083				0.57565
			2.03932				0.575667
			2.03782				0.575683
			2.03635				0.575699
			2.03493				0.575715
			2.03356				0.575731
			2.03226				0.575746
			2.03105				0.575762
			2.02993				0.575777
			2.02892				0.575792
			2.02804				0.575807
			2.0273				0.575822
			2.02672				0.575837
			2.02631				0.575851
			2.02609				0.575866
			2.02605				0.57588
			2.02621				0.575894
			2.02658				0.575908
			2.02717				0.575922
			2.028				0.575936
			2.02908				0.575949
			2.03042				0.575963
			2.03207				0.575976
			2.03402				0.575989
			2.03631				0.576002
			2.03895				0.576015
			2.04196				0.576028
			2.04536				0.57604
			2.04916				0.576053
			2.05336				0.576065
[truncated: 1,046,576+ more rows]

## Sheet: Fig2-S1C
		TN
			Before	MIRS	After
			8.22045	9.34525	7.38334
			5.94763	7.91094	7.24167
			3.20972	6.21553	3.47619
			13.3437	12.7113	9.59
			10.079	11.4105	9.1449
			10.9863	10.0708	10.6907
			10.3902	8.54339	9.54629
			11.6867	8.76317	8.23622
			2.84486	3.1107	1.30268
			7.65616	10.3599	6.26246
			11.8645	11.4669	10.7263
			8.19074	7.88505	8.7307
			11.3701	12.5504	11.6841
			13.414	6.87871	8.5707
			9.64719	13.4741	7.24162
			13.2877	17.5234	10.2075
			8.956	11.247	12.7293
			10.8588	14.7651	10.6861
			7.72643	9.38552	9.89358
			9.28016	8.70967	8.44031
		NT
			Before	MIRS	After
			-1.08189	-1.46757	-0.663426
			-1.18317	-2.63231	-3.11207
			-1.69369	-2.71681	-1.98804
			-1.90801	-1.66961	-2.70449
			-1.40585	-1.01646	-1.17756
			-2.17674	-3.00358	-2.62954
			-2.34299	-2.42216	2.27915
			-2.67907	-3.4098	-0.679271
			-1.48549	-1.7567	-1.66743
			-2.052	-2.07704	-1.65679
			-2.37364	-1.38844	-1.72056
			-3.37274	-2.56702	-2.54327
			-4.29727	-4.4528	-5.81981
			-2.31529	-3.84051	-4.4368
			-2.87698	-1.90793	-0.752865
			-1.73068	-3.70368	-2.55841
			-1.32951	-2.30225	-2.55672
			-3.90005	-3.51444	-3.92492
			-5.66125	-6.99067	-5.39852
			-3.06381	-3.88881	-2.45328

## Sheet: Fig2-S1D
		TN
			Before	MIRS	After
			2.68256	1.95129	2.38696
			1.92557	1.85003	1.73221
			0.882445	0.882769	0.611817
			3.08376	3.48219	3.30775
			1.87268	1.49967	2.0266
			1.30316	1.4924	1.37154
			1.6202	1.08523	1.36079
			3.25249	2.84094	2.71416
			0.616211	0.5938	0.6181
			1.68467	1.43201	1.9642
			2.07529	2.11709	2.23046
			1.86522	1.7123	1.76406
			3.37349	3.198	3.08468
			5.34123	5.21933	4.41039
			2.35521	2.42843	2.41424
			1.95351	2.25502	1.81851
			2.23023	2.47768	2.68669
			2.30811	2.51225	2.2568
			1.79507	1.84037	1.83393
			2.3004	2.00503	2.35769
		NT
			Before	MIRS	After
			2.03229	2.14538	2.04298
			5.05278	5.36246	4.67417
			2.0945	2.09026	2.2217
			3.58649	3.28679	3.54401
			1.41618	1.35245	1.4293
			5.96628	4.21564	4.5989
			2.83748	2.40064	2.5945
			3.19422	3.22768	3.68525
			1.13419	1.21565	1.2938
			2.17493	2.21757	2.18189
			1.62421	1.61294	1.66252
			3.50363	2.8959	3.27281
			3.44973	3.64701	3.74448
			4.60081	3.96154	4.79478
			2.5337	1.97973	2.15474
			2.10965	1.71607	2.10286
			1.92613	1.65915	1.79791
			2.93292	3.01389	2.96305
			4.37783	4.30398	3.94103
			2.63018	2.2031	2.53366

## Sheet: Fig2-S1F
		TN				NT
			EOG (deg)				EOG (deg)
			4.1863				0.990516
			4.18536				0.989295
			4.18448				0.988046
			4.18368				0.986769
			4.18295				0.985468
			4.18231				0.984146
			4.18176				0.982805
			4.18132				0.98145
			4.18098				0.980083
			4.18075				0.978708
			4.18063				0.977327
			4.18063				0.975945
			4.18074				0.974563
			4.18097				0.973186
			4.18131				0.971817
			4.18176				0.970458
			4.18231				0.969113
			4.18296				0.967784
			4.18371				0.966475
			4.18454				0.965188
			4.18544				0.963925
			4.1864				0.96269
			4.18741				0.961483
			4.18846				0.960309
			4.18954				0.959167
			4.19062				0.958061
			4.19171				0.956991
			4.19278				0.95596
			4.19381				0.954968
			4.19481				0.954017
			4.19574				0.953107
			4.1966				0.952239
			4.19738				0.951413
			4.19806				0.95063
			4.19863				0.94989
			4.19908				0.949193
			4.1994				0.948538
			4.19959				0.947924
			4.19964				0.947353
			4.19953				0.946821
			4.19928				0.946329
			4.19886				0.945875
			4.19829				0.945459
			4.19755				0.945078
			4.19666				0.944731
			4.1956				0.944417
			4.19439				0.944134
			4.19303				0.94388
			4.19152				0.943653
			4.18986				0.943452
			4.18808				0.943274
			4.18616				0.943118
			4.18413				0.942981
			4.18199				0.942862
			4.17975				0.94276
			4.17743				0.942671
			4.17503				0.942595
			4.17256				0.942529
			4.17005				0.942473
			4.1675				0.942425
			4.16492				0.942383
			4.16233				0.942346
			4.15973				0.942313
			4.15715				0.942284
			4.1546				0.942257
			4.15208				0.942232
			4.14961				0.942209
			4.1472				0.942187
			4.14487				0.942166
			4.14261				0.942147
			4.14045				0.94213
			4.13839				0.942115
			4.13643				0.942102
			4.13459				0.942094
			4.13288				0.942089
			4.13129				0.942091
			4.12983				0.942099
			4.12851				0.942115
			4.12734				0.942141
			4.1263				0.942179
			4.12541				0.94223
			4.12466				0.942295
			4.12405				0.942377
			4.12358				0.942478
			4.12326				0.9426
			4.12307				0.942744
			4.12301				0.942913
			4.12308				0.943109
			4.12328				0.943333
			4.12359				0.943587
			4.12402				0.943874
			4.12455				0.944194
			4.12517				0.944551
			4.12589				0.944944
			4.12669				0.945376
			4.12756				0.945847
			4.1285				0.946359
			4.12949				0.946913
			4.13054				0.947508
			4.13162				0.948147
			4.13273				0.948829
			4.13387				0.949553
			4.13502				0.950321
			4.13617				0.951131
			4.13732				0.951983
			4.13847				0.952877
			4.13959				0.953811
			4.14069				0.954783
			4.14176				0.955794
			4.1428				0.956841
			4.14379				0.957922
			4.14473				0.959036
			4.14562				0.96018
			4.14646				0.961353
			4.14722				0.962551
			4.14792				0.963773
			4.14855				0.965015
			4.1491				0.966275
			4.14957				0.967551
			4.14996				0.968839
			4.15026				0.970138
			4.15047				0.971443
			4.15059				0.972752
			4.15061				0.974063
			4.15054				0.975372
			4.15037				0.976677
			4.1501				0.977975
			4.14974				0.979264
			4.14927				0.980541
			4.14871				0.981804
			4.14806				0.98305
			4.14731				0.984278
			4.14648				0.985486
			4.14556				0.986671
			4.14457				0.987832
			4.14351				0.988968
			4.14238				0.990077
			4.1412				0.991159
			4.13997				0.992211
			4.13871				0.993234
			4.13743				0.994227
			4.13613				0.995189
			4.13484				0.996121
			4.13356				0.997021
			4.13231				0.997891
			4.1311				0.99873
			4.12996				0.999538
			4.12889				1.00032
			4.1279				1.00107
			4.12702				1.00179
			4.12625				1.00248
			4.12562				1.00315
			4.12514				1.00379
			4.12481				1.00441
			4.12465				1.00501
			4.12467				1.00558
			4.12488				1.00613
			4.12529				1.00667
			4.1259				1.00719
			4.12673				1.00769
			4.12776				1.00818
			4.12902				1.00866
			4.13048				1.00913
			4.13216				1.00959
			4.13405				1.01005
			4.13613				1.0105
			4.13842				1.01094
			4.14089				1.01138
			4.14353				1.01183
			4.14634				1.01227
			4.14929				1.01272
			4.15237				1.01317
			4.15557				1.01362
			4.15887				1.01408
			4.16224				1.01455
			4.16567				1.01502
			4.16914				1.0155
			4.17263				1.01599
			4.17612				1.01649
			4.17959				1.017
			4.18301				1.01752
			4.18638				1.01804
			4.18967				1.01858
			4.19287				1.01912
			4.19596				1.01967
			4.19892				1.02023
			4.20175				1.02079
			4.20443				1.02136
			4.20696				1.02193
			4.20932				1.0225
			4.2115				1.02308
			4.2135				1.02365
			4.21532				1.02422
			4.21695				1.02479
			4.2184				1.02535
			4.21966				1.02591
			4.22074				1.02645
			4.22163				1.02698
			4.22235				1.0275
			4.2229				1.028
			4.2233				1.02849
			4.22353				1.02895
			4.22363				1.02939
			4.2236				1.02981
			4.22344				1.0302
			4.22318				1.03057
			4.22283				1.0309
			4.22239				1.03121
			4.22189				1.03148
			4.22133				1.03172
			4.22074				1.03192
			4.22013				1.03209
			4.2195				1.03222
			4.21888				1.03232
			4.21828				1.03237
			4.21772				1.03239
			4.2172				1.03238
			4.21674				1.03233
			4.21636				1.03224
			4.21606				1.03212
			4.21585				1.03196
			4.21574				1.03177
			4.21575				1.03156
			4.21589				1.03131
			4.21614				1.03103
			4.21654				1.03073
			4.21707				1.03041
			4.21774				1.03006
			4.21856				1.0297
			4.21953				1.02933
			4.22065				1.02894
			4.22191				1.02855
			4.22332				1.02815
			4.22487				1.02775
			4.22656				1.02734
			4.22839				1.02695
			4.23034				1.02656
			4.23242				1.02618
			4.23462				1.02582
			4.23693				1.02548
			4.23934				1.02515
			4.24184				1.02486
			4.24442				1.02458
			4.24708				1.02434
			4.2498				1.02413
			4.25257				1.02396
			4.25538				1.02382
			4.25823				1.02373
			4.26109				1.02367
			4.26396				1.02366
			4.26682				1.02369
			4.26967				1.02376
			4.2725				1.02389
			4.27529				1.02406
			4.27804				1.02427
			4.28073				1.02454
			4.28336				1.02485
			4.28591				1.02521
			4.28839				1.02562
			4.29078				1.02607
			4.29307				1.02656
			4.29526				1.0271
			4.29735				1.02768
			4.29932				1.0283
			4.30117				1.02896
			4.3029				1.02965
			4.30449				1.03038
			4.30595				1.03114
			4.30727				1.03193
			4.30844				1.03275
			4.30946				1.03359
			4.31032				1.03445
			4.31103				1.03534
			4.31157				1.03624
			4.31195				1.03716
			4.31216				1.0381
			4.31219				1.03904
			4.31206				1.03999
			4.31176				1.04096
			4.31129				1.04192
			4.31064				1.04289
			4.30983				1.04386
			4.30886				1.04483
			4.30772				1.0458
			4.30643				1.04677
			4.30499				1.04774
			4.30341				1.0487
			4.3017				1.04966
			4.29987				1.05062
			4.29794				1.05157
			4.2959				1.05252
			4.29379				1.05346
			4.29161				1.0544
			4.28938				1.05534
			4.28711				1.05628
			4.28483				1.05721
			4.28254				1.05815
			4.28028				1.05909
			4.27806				1.06003
			4.27589				1.06098
			4.27379				1.06193
			4.27179				1.06289
			4.26989				1.06386
			4.26812				1.06485
			4.26648				1.06585
			4.265				1.06686
			4.26368				1.0679
			4.26254				1.06896
			4.26158				1.07004
			4.2608				1.07115
			4.26022				1.07229
			4.25984				1.07345
			4.25965				1.07466
			4.25966				1.07589
			4.25985				1.07717
			4.26023				1.07849
			4.26078				1.07985
			4.26149				1.08125
			4.26234				1.0827
			4.26333				1.0842
			4.26443				1.08575
			4.26562				1.08735
			4.26688				1.089
			4.26819				1.09071
			4.26953				1.09248
			4.27086				1.0943
			4.27218				1.09618
			4.27344				1.09811
			4.27463				1.10011
			4.27571				1.10216
			4.27668				1.10427
			4.27749				1.10643
			4.27814				1.10866
			4.2786				1.11094
			4.27885				1.11328
			4.27887				1.11567
			4.27865				1.11811
			4.27818				1.12061
			4.27744				1.12316
			4.27642				1.12575
			4.27511				1.12839
			4.27352				1.13107
			4.27162				1.13379
			4.26943				1.13655
			4.26694				1.13935
			4.26415				1.14218
			4.26107				1.14503
			4.2577				1.14792
			4.25405				1.15082
			4.25012				1.15375
			4.24594				1.15669
			4.24151				1.15964
			4.23685				1.16261
			4.23196				1.16558
			4.22687				1.16856
			4.2216				1.17153
			4.21616				1.17451
			4.21057				1.17747
			4.20486				1.18044
			4.19903				1.18339
			4.19311				1.18632
			4.18713				1.18925
			4.1811				1.19215
			4.17504				1.19504
			4.16898				1.19791
			4.16294				1.20076
			4.15693				1.20358
			4.15098				1.20638
			4.14511				1.20916
			4.13934				1.21192
			4.13368				1.21465
			4.12816				1.21735
			4.12279				1.22004
			4.11759				1.2227
			4.11256				1.22534
			4.10774				1.22797
			4.10313				1.23057
			4.09874				1.23316
			4.09459				1.23574
			4.09068				1.2383
			4.08703				1.24085
			4.08365				1.2434
			4.08053				1.24594
			4.07769				1.24847
			4.07513				1.25101
			4.07286				1.25355
			4.07088				1.2561
			4.06919				1.25866
			4.06779				1.26123
			4.06669				1.26381
			4.06587				1.2664
			4.06534				1.26902
			4.06509				1.27166
			4.06512				1.27432
			4.06542				1.277
			4.06598				1.27972
			4.0668				1.28246
			4.06787				1.28523
			4.06917				1.28803
			4.07069				1.29086
			4.07241				1.29373
			4.07433				1.29663
			4.07642				1.29956
			4.07867				1.30252
			4.08104				1.30551
			4.08353				1.30854
			4.0861				1.31159
			4.08873				1.31467
			4.09138				1.31778
			4.09403				1.32091
			4.09665				1.32406
			4.09919				1.32723
			4.10164				1.33042
			4.10396				1.33362
			4.10612				1.33683
			4.10811				1.34005
			4.1099				1.34328
			4.11147				1.3465
			4.11281				1.34973
			4.1139				1.35294
			4.11473				1.35615
			4.1153				1.35934
			4.1156				1.36251
			4.11561				1.36567
			4.11535				1.3688
			4.1148				1.3719
			4.11397				1.37498
			4.11287				1.37802
			4.11149				1.38102
			4.10984				1.38398
			4.10794				1.3869
			4.10578				1.38978
			4.10338				1.39261
			4.10075				1.39539
			4.09791				1.39813
			4.09488				1.4008
			4.09165				1.40343
			4.08827				1.406
			4.08473				1.40852
			4.08106				1.41099
			4.07729				1.41339
			4.07342				1.41575
			4.06948				1.41804
			4.06549				1.42028
			4.06146				1.42247
			4.05742				1.42461
			4.05338				1.42669
			4.04937				1.42872
			4.0454				1.43071
			4.04148				1.43264
			4.03764				1.43453
			4.03389				1.43638
			4.03025				1.43819
			4.02672				1.43996
			4.02334				1.44169
			4.02011				1.44339
			4.01706				1.44505
			4.01419				1.44669
			4.01153				1.4483
			4.0091				1.44989
			4.00691				1.45146
			4.00498				1.45301
			4.00335				1.45455
			4.00202				1.45607
			4.00101				1.45759
			4.00037				1.4591
			4.00009				1.4606
			4.00021				1.4621
			4.00075				1.46361
			4.00172				1.46511
			4.00315				1.46663
			4.00505				1.46815
			4.00744				1.46967
			4.01033				1.47121
			4.01372				1.47276
			4.01761				1.47433
			4.02202				1.47591
			4.02692				1.4775
			4.03231				1.47911
			4.03817				1.48074
			4.04448				1.48239
			4.05119				1.48405
			4.05827				1.48572
			4.06567				1.48741
			4.07333				1.48912
			4.08119				1.49084
			4.08917				1.49258
			4.09717				1.49432
			4.10511				1.49607
			4.11288				1.49784
			4.12036				1.4996
			4.12742				1.50137
			4.13394				1.50314
			4.13977				1.50491
			4.14476				1.50668
			4.14875				1.50843
			4.1516				1.51018
			4.15313				1.51191
			4.15319				1.51362
			4.15161				1.51532
			4.14823				1.51699
			4.1429				1.51863
			4.13546				1.52025
			4.12577				1.52183
			4.11369				1.52337
			4.09908				1.52488
			4.08184				1.52634
			4.06185				1.52776
			4.03902				1.52913
			4.01326				1.53045
			3.98451				1.53172
			3.95271				1.53294
			3.91782				1.5341
			3.8798				1.53521
			3.83866				1.53626
			3.79438				1.53725
			3.74698				1.53818
			3.69649				1.53906
			3.64295				1.53987
			3.58641				1.54063
			3.52693				1.54134
			3.46459				1.54199
			3.39948				1.54258
			3.33171				1.54312
			3.26137				1.54362
			3.18861				1.54407
			3.11353				1.54447
			3.0363				1.54483
			2.95706				1.54516
			2.87598				1.54545
			2.79322				1.54571
			2.70897				1.54594
			2.62343				1.54615
			2.53678				1.54635
			2.44924				1.54652
			2.36104				1.54669
			2.27238				1.54685
			2.18351				1.54701
			2.09467				1.54717
			2.00611				1.54734
			1.91807				1.54751
			1.83081				1.54771
			1.74458				1.54792
			1.65963				1.54815
			1.57623				1.5484
			1.49462				1.54868
			1.41504				1.54899
			1.33773				1.54934
			1.26291				1.54972
			1.19079				1.55013
			1.12158				1.55058
			1.05546				1.55107
			0.992602				1.5516
			0.93317				1.55217
			0.877301				1.55277
			0.825119				1.55342
			0.776731				1.5541
			0.73223				1.55482
			0.691691				1.55558
			0.655173				1.55637
			0.622719				1.55719
			0.594359				1.55804
			0.570105				1.55891
			0.549956				1.55981
			0.533895				1.56073
			0.521894				1.56167
			0.513907				1.56261
			0.509877				1.56357
			0.509733				1.56453
			0.513391				1.5655
			0.52075				1.56646
			0.5317				1.56742
			0.546113				1.56837
			0.563848				1.5693
			0.584751				1.57021
			0.608651				1.57111
			0.635365				1.57198
			0.664691				1.57282
			0.696418				1.57362
			0.730314				1.5744
			0.766139				1.57513
			0.803636				1.57583
			0.842535				1.57648
			0.882557				1.57709
			0.923408				1.57765
			0.964789				1.57817
			1.00639				1.57863
			1.0479				1.57904
			1.089				1.5794
			1.12938				1.57971
			1.16871				1.57997
			1.20668				1.58018
			1.24299				1.58033
			1.27733				1.58044
			1.30941				1.58049
			1.33896				1.5805
			1.36572				1.58045
			1.38944				1.58037
			1.4099				1.58024
			1.42688				1.58007
			1.44021				1.57986
			1.44971				1.57961
			1.45526				1.57933
			1.45672				1.57901
			1.45401				1.57867
			1.44705				1.5783
			1.4358				1.57792
			1.42024				1.57751
			1.40036				1.57708
			1.37618				1.57665
			1.34774				1.5762
			1.31513				1.57575
			1.27841				1.57529
			1.2377				1.57483
			1.19313				1.57438
			1.14485				1.57394
			1.09302				1.5735
			1.03784				1.57307
			0.979519				1.57266
			0.918276				1.57227
			0.854358				1.57189
			0.788029				1.57154
			0.719567				1.57122
			0.649267				1.57091
			0.577433				1.57064
			0.504386				1.57039
			0.430451				1.57018
			0.355964				1.56999
			0.281261				1.56984
			0.206684				1.56972
			0.13257				1.56963
			0.0592518				1.56957
			-0.0129429				1.56954
			-0.0836977				1.56954
			-0.152709				1.56957
			-0.219686				1.56963
			-0.284358				1.56972
			-0.346472				1.56983
			-0.405794				1.56996
			-0.462115				1.57011
			-0.515246				1.57027
			-0.565024				1.57046
			-0.611308				1.57065
			-0.653983				1.57085
			-0.692957				1.57105
			-0.728163				1.57125
			-0.759555				1.57145
			-0.787112				1.57164
			-0.810837				1.57182
			-0.830751				1.57198
			-0.846898				1.57213
			-0.859342				1.57225
			-0.868166				1.57234
			-0.873469				1.5724
			-0.875369				1.57242
			-0.874001				1.57241
			-0.869512				1.57235
			-0.862066				1.57224
			-0.851837				1.57209
			-0.839015				1.57188
			-0.823797				1.57162
			-0.806391				1.5713
			-0.787016				1.57092
			-0.765896				1.57048
			-0.743263				1.56997
			-0.719356				1.5694
			-0.694416				1.56877
			-0.668689				1.56807
			-0.642424				1.56731
			-0.61587				1.56649
			-0.589275				1.5656
			-0.562887				1.56466
			-0.536949				1.56365
			-0.511701				1.56258
			-0.487374				1.56147
			-0.464193				1.5603
			-0.442375				1.55908
			-0.422122				1.55781
			-0.403628				1.55651
			-0.387071				1.55517
			-0.372615				1.5538
			-0.360408				1.5524
			-0.350584				1.55098
			-0.343258				1.54954
			-0.338528				1.54809
			-0.336478				1.54663
			-0.337171				1.54517
			-0.340656				1.54372
			-0.346965				1.54227
			-0.356117				1.54083
			-0.368113				1.53941
			-0.382942				1.53802
			-0.400582				1.53665
			-0.420997				1.53531
			-0.444141				1.53401
			-0.46996				1.53275
			-0.498389				1.53153
			-0.529357				1.53035
			-0.562785				1.52923
			-0.598588				1.52815
			-0.636673				1.52713
			-0.676944				1.52615
			-0.719298				1.52524
			-0.763625				1.52437
			-0.809812				1.52356
			-0.857737				1.52281
			-0.907273				1.52211
			-0.958286				1.52146
			-1.01064				1.52086
			-1.06417				1.52031
			-1.11875				1.5198
			-1.17419				1.51934
			-1.23033				1.51892
			-1.28699				1.51853
			-1.34399				1.51817
			-1.40114				1.51785
			-1.45825				1.51755
			-1.51512				1.51726
			-1.57155				1.517
			-1.62735				1.51674
			-1.6823				1.51649
			-1.73623				1.51625
			-1.78892				1.516
			-1.8402				1.51574
			-1.88989				1.51547
			-1.9378				1.51519
			-1.98377				1.51488
			-2.02764				1.51455
			-2.06927				1.51419
			-2.10852				1.51381
			-2.14527				1.51338
			-2.1794				1.51292
			-2.21081				1.51242
			-2.23942				1.51187
			-2.26515				1.51128
			-2.28793				1.51064
			-2.30771				1.50995
			-2.32446				1.50922
			-2.33814				1.50843
			-2.34875				1.50759
			-2.35628				1.50671
			-2.36075				1.50577
			-2.36217				1.50478
			-2.36059				1.50374
			-2.35605				1.50266
			-2.34861				1.50152
			-2.33835				1.50035
			-2.32536				1.49913
			-2.30972				1.49787
			-2.29157				1.49657
			-2.27101				1.49524
			-2.24819				1.49388
			-2.22326				1.49249
			-2.19639				1.49107
			-2.16773				1.48964
			-2.13749				1.48818
			-2.10586				1.48671
			-2.07304				1.48523
			-2.03924				1.48374
			-2.0047				1.48224
			-1.96964				1.48075
			-1.9343				1.47926
			-1.89892				1.47778
			-1.86373				1.47631
			-1.829				1.47486
			-1.79495				1.47343
			-1.76183				1.47202
			-1.72988				1.47063
			-1.69933				1.46927
			-1.6704				1.46795
			-1.64331				1.46665
			-1.61826				1.4654
			-1.59543				1.46418
			-1.57502				1.46301
			-1.55717				1.46188
			-1.54204				1.4608
			-1.52976				1.45976
			-1.52043				1.45877
			-1.51417				1.45782
			-1.51104				1.45693
			-1.51111				1.45608
			-1.51442				1.45528
			-1.52102				1.45452
			-1.53091				1.45382
			-1.54409				1.45315
			-1.56055				1.45253
			-1.58026				1.45195
			-1.60319				1.45141
			-1.62929				1.45091
			-1.65848				1.45043
			-1.6907				1.44999
			-1.72587				1.44957
			-1.76388				1.44917
			-1.80464				1.44879
			-1.84803				1.44843
			-1.89393				1.44807
			-1.9422				1.44771
			-1.9927				1.44735
			-2.04528				1.44699
			-2.09976				1.44662
			-2.15598				1.44622
			-2.21376				1.44581
			-2.2729				1.44537
			-2.33322				1.4449
			-2.3945				1.44439
			-2.45654				1.44384
			-2.51913				1.44325
			-2.58205				1.4426
			-2.6451				1.4419
			-2.70806				1.44114
			-2.77071				1.44032
			-2.83287				1.43943
			-2.89431				1.43848
			-2.95487				1.43745
			-3.01434				1.43636
			-3.07255				1.43519
			-3.12934				1.43394
			-3.18455				1.43262
			-3.23804				1.43122
			-3.28968				1.42975
			-3.33935				1.42821
			-3.38694				1.42659
			-3.43235				1.4249
			-3.47551				1.42315
			-3.51634				1.42133
			-3.55478				1.41944
			-3.59079				1.4175
			-3.62433				1.4155
			-3.65537				1.41345
			-3.68389				1.41136
			-3.70991				1.40923
			-3.7334				1.40706
			-3.7544				1.40486
			-3.77293				1.40264
			-3.789				1.40041
			-3.80268				1.39816
			-3.81399				1.3959
			-3.823				1.39364
			-3.82977				1.39139
			-3.83437				1.38916
			-3.83687				1.38694
			-3.83736				1.38474
			-3.83591				1.38257
			-3.83262				1.38043
			-3.82759				1.37833
			-3.82092				1.37628
			-3.81271				1.37427
			-3.80306				1.3723
			-3.79209				1.37039
			-3.77991				1.36854
			-3.76663				1.36674
			-3.75236				1.365
			-3.73721				1.36332
			-3.72131				1.36169
			-3.70474				1.36013
			-3.68764				1.35862
			-3.67009				1.35717
			-3.6522				1.35578
			-3.63408				1.35444
			-3.61581				1.35315
			-3.59748				1.35191
			-3.57918				1.35072
			-3.56099				1.34956
			-3.54297				1.34844
			-3.52521				1.34735
			-3.50775				1.34629
			-3.49065				1.34525
			-3.47396				1.34423
			-3.45772				1.34322
			-3.44197				1.34221
			-3.42674				1.34121
			-3.41206				1.3402
			-3.39793				1.33918
			-3.38439				1.33814
			-3.37143				1.33709
			-3.35908				1.33601
			-3.34733				1.33489
			-3.33618				1.33374
			-3.32564				1.33256
			-3.3157				1.33133
			-3.30635				1.33005
			-3.2976				1.32872
			-3.28944				1.32734
			-3.28185				1.3259
			-3.27482				1.3244
			-3.26835				1.32284
			-3.26243				1.32122
			-3.25703				1.31954
			-3.25215				1.3178
			-3.24776				1.31599
			-3.24386				1.31412
			-3.24041				1.31218
			-3.23741				1.31019
			-3.23481				1.30814
			-3.23261				1.30603
			-3.23077				1.30387
			-3.22927				1.30165
			-3.22807				1.29938
			-3.22716				1.29707
			-3.22649				1.29472
			-3.22605				1.29233
			-3.22579				1.2899
			-3.22569				1.28744
			-3.22572				1.28496
			-3.22586				1.28245
			-3.22606				1.27993
			-3.22631				1.27739
			-3.22659				1.27485
			-3.22685				1.27231
			-3.22709				1.26977
			-3.22728				1.26724
			-3.2274				1.26472
			-3.22743				1.26222
			-3.22736				1.25975
			-3.22717				1.2573
			-3.22684				1.25488
			-3.22638				1.25251
			-3.22576				1.25017
			-3.22499				1.24788
			-3.22406				1.24564
			-3.22296				1.24346
			-3.22171				1.24133
			-3.2203				1.23927
			-3.21873				1.23727
			-3.21703				1.23533
			-3.21518				1.23347
			-3.21322				1.23168
			-3.21114				1.22996
			-3.20897				1.22832
			-3.20671				1.22675
			-3.20439				1.22526
			-3.20203				1.22385
			-3.19963				1.22251
			-3.19723				1.22125
			-3.19483				1.22006
			-3.19245				1.21895
			-3.19012				1.2179
			-3.18784				1.21693
			-3.18564				1.21602
			-3.18352				1.21518
			-3.18151				1.21439
			-3.17962				1.21366
			-3.17785				1.21298
			-3.17622				1.21235
			-3.17473				1.21176
			-3.1734				1.21121
			-3.17222				1.21069
			-3.1712				1.21019
			-3.17035				1.20972
			-3.16967				1.20925
			-3.16914				1.2088
			-3.16878				1.20835
			-3.16857				1.2079
			-3.16852				1.20744
			-3.1686				1.20696
			-3.16883				1.20647
			-3.16918				1.20595
			-3.16964				1.20539
			-3.17021				1.20481
			-3.17087				1.20418
			-3.17161				1.20351
			-3.17241				1.20279
			-3.17327				1.20201
			-3.17416				1.20119
			-3.17507				1.20031
			-3.17599				1.19936
			-3.1769				1.19836
			-3.1778				1.1973
			-3.17866				1.19618
			-3.17947				1.195
			-3.18022				1.19376
			-3.1809				1.19246
			-3.1815				1.19111
			-3.182				1.18971
			-3.1824				1.18825
			-3.18268				1.18675
			-3.18285				1.18521
			-3.18288				1.18364
			-3.18278				1.18203
			-3.18254				1.1804
			-3.18216				1.17875
			-3.18163				1.17708
			-3.18095				1.17541
			-3.18012				1.17374
			-3.17914				1.17208
			-3.17801				1.17043
			-3.17673				1.1688
			-3.17529				1.16721
			-3.17372				1.16564
			-3.172				1.16412
			-3.17014				1.16265
			-3.16815				1.16123
			-3.16603				1.15988
			-3.16379				1.15859
			-3.16143				1.15738
			-3.15896				1.15624
			-3.15638				1.15518
			-3.15371				1.15421
			-3.15094				1.15333
			-3.1481				1.15255
			-3.14518				1.15185
			-3.14219				1.15125
			-3.13914				1.15075
			-3.13605				1.15034
			-3.13291				1.15003
			-3.12975				1.14982
			-3.12656				1.14969
			-3.12335				1.14966
			-3.12014				1.14972
			-3.11693				1.14986
			-3.11372				1.15008
			-3.11054				1.15038
			-3.10738				1.15075
			-3.10426				1.15119
			-3.10118				1.15168
			-3.09815				1.15223
			-3.09518				1.15283
			-3.09228				1.15346
			-3.08945				1.15413
			-3.08671				1.15483
			-3.08405				1.15555
			-3.08149				1.15628
			-3.07904				1.15702
			-3.0767				1.15776
			-3.07448				1.1585
			-3.07238				1.15922
			-3.07041				1.15992
			-3.06858				1.16059
			-3.06688				1.16124
			-3.06533				1.16185
			-3.06393				1.16242
			-3.06267				1.16295
			-3.06156				1.16343
			-3.06059				1.16386
			-3.05977				1.16424
			-3.05909				1.16456
			-3.05855				1.16482
			-3.05814				1.16502
			-3.05785				1.16516
			-3.05767				1.16524
			-3.0576				1.16527
			-3.05762				1.16523
			-3.05772				1.16513
			-3.05788				1.16498
			-3.0581				1.16478
			-3.05835				1.16452
			-3.05862				1.16421
			-3.05889				1.16386
			-3.05915				1.16347
			-3.05938				1.16304
			-3.05956				1.16257
			-3.05967				1.16208
			-3.05971				1.16156
			-3.05965				1.16102
			-3.05948				1.16047
			-3.05919				1.15991
			-3.05875				1.15935
			-3.05817				1.15879
			-3.05743				1.15824
			-3.05651				1.1577
			-3.05542				1.15718
			-3.05415				1.15668
			-3.05269				1.15621
			-3.05103				1.15578
			-3.04919				1.1554
			-3.04715				1.15505
			-3.04493				1.15476
			-3.04252				1.15453
			-3.03994				1.15436
			-3.03718				1.15425
			-3.03426				1.15422
			-3.03119				1.15426
			-3.02797				1.15438
			-3.02463				1.15458
			-3.02118				1.15486
			-3.01763				1.15523
			-3.01399				1.15569
			-3.01029				1.15624
			-3.00653				1.15689
			-3.00274				1.15763
			-2.99894				1.15846
			-2.99513				1.15938
			-2.99133				1.1604
			-2.98757				1.16151
			-2.98385				1.16272
			-2.98019				1.16401
			-2.9766				1.16538
			-2.9731				1.16684
			-2.96969				1.16839
			-2.96639				1.17
			-2.96321				1.17169
			-2.96015				1.17344
			-2.95722				1.17525
			-2.95442				1.17712
			-2.95176				1.17904
			-2.94925				1.181
			-2.94688				1.183
			-2.94465				1.18503
			-2.94256				1.18707
			-2.94062				1.18914
			-2.93882				1.19121
			-2.93715				1.19328
			-2.93561				1.19534
			-2.9342				1.19739
			-2.93291				1.19942
			-2.93173				1.20142
			-2.93065				1.20338
			-2.92966				1.2053
			-2.92877				1.20718
			-2.92794				1.20899
			-2.92719				1.21075
			-2.92648				1.21245
			-2.92582				1.21407
			-2.9252				1.21563
			-2.92459				1.2171
			-2.924				1.2185
			-2.9234				1.21982
			-2.92279				1.22106
			-2.92215				1.22221
			-2.92148				1.22328
			-2.92076				1.22427
			-2.91999				1.22518
			-2.91915				1.22602
			-2.91824				1.22678
			-2.91724				1.22747
			-2.91615				1.22809
			-2.91496				1.22865
			-2.91367				1.22916
			-2.91227				1.22961
			-2.91075				1.23002
			-2.90911				1.2304
			-2.90735				1.23075
			-2.90547				1.23107
			-2.90346				1.23138
			-2.90132				1.23169
			-2.89905				1.23199
			-2.89665				1.23231
			-2.89412				1.23265
			-2.89147				1.23301
			-2.8887				1.23341
			-2.8858				1.23385
			-2.88278				1.23435
			-2.87965				1.2349
			-2.87641				1.23551
			-2.87306				1.23619
			-2.8696				1.23695
			-2.86605				1.23779
			-2.86241				1.23871
			-2.85869				1.23973
			-2.85488				1.24083
			-2.851				1.24203
			-2.84705				1.24332
			-2.84304				1.24471
			-2.83898				1.24619
			-2.83487				1.24777
			-2.83072				1.24944
			-2.82654				1.25121
			-2.82233				1.25306
			-2.8181				1.25499
			-2.81386				1.257
			-2.80961				1.25908
			-2.80537				1.26124
			-2.80113				1.26345
			-2.7969				1.26571
			-2.7927				1.26803
			-2.78853				1.27038
			-2.78439				1.27276
			-2.78029				1.27516
			-2.77624				1.27758
			-2.77224				1.28
			-2.76831				1.28241
			-2.76444				1.28482
			-2.76064				1.2872
			-2.75691				1.28955
			-2.75327				1.29187
			-2.74971				1.29414
			-2.74625				1.29635
			-2.74288				1.2985
			-2.7396				1.30059
			-2.73642				1.3026
			-2.73334				1.30453
			-2.73037				1.30638
			-2.72749				1.30813
			-2.72471				1.30979
			-2.72203				1.31135
			-2.71944				1.31281
			-2.71694				1.31416
			-2.71452				1.31541
			-2.71218				1.31656
			-2.70991				1.31759
			-2.7077				1.31852
			-2.70553				1.31934
			-2.70341				1.32005
			-2.70132				1.32066
			-2.69924				1.32117
			-2.69717				1.32158
			-2.69509				1.3219
			-2.69298				1.32212
			-2.69084				1.32225
			-2.68865				1.3223
			-2.6864				1.32227
			-2.68407				1.32217
			-2.68166				1.322
			-2.67914				1.32176
			-2.67651				1.32147
			-2.67375				1.32113
			-2.67086				1.32074
			-2.66783				1.32031
			-2.66464				1.31986
			-2.66129				1.31937
			-2.65778				1.31887
			-2.6541				1.31835
			-2.65024				1.31782
			-2.64621				1.3173
			-2.642				1.31678
			-2.63762				1.31627
			-2.63306				1.31577
			-2.62833				1.31531
			-2.62344				1.31487
			-2.6184				1.31446
			-2.6132				1.31409
			-2.60786				1.31377
			-2.60238				1.31349
			-2.59679				1.31327
			-2.59108				1.3131
			-2.58528				1.31299
			-2.57939				1.31294
			-2.57344				1.31295
			-2.56742				1.31303
			-2.56136				1.31317
			-2.55526				1.31338
			-2.54916				1.31366
			-2.54304				1.314
			-2.53694				1.31441
			-2.53086				1.31488
			-2.52482				1.31541
			-2.51882				1.316
			-2.51288				1.31665
			-2.50701				1.31734
			-2.50121				1.31809
			-2.49549				1.31887
			-2.48987				1.31969
			-2.48435				1.32053
			-2.47892				1.3214
			-2.47361				1.32229
			-2.4684				1.32318
			-2.46331				1.32408
			-2.45833				1.32497
			-2.45347				1.32584
			-2.44871				1.32668
			-2.44407				1.3275
			-2.43954				1.32827
			-2.43512				1.329
			-2.43079				1.32966
			-2.42656				1.33026
			-2.42243				1.33078
			-2.41838				1.33122
			-2.41441				1.33157
			-2.41051				1.33182
			-2.40668				1.33197
			-2.4029				1.332
			-2.39917				1.33192
			-2.39548				1.33172
			-2.39183				1.33139
			-2.38819				1.33094
			-2.38456				1.33035
			-2.38094				1.32963
			-2.37731				1.32877
			-2.37367				1.32778
			-2.37001				1.32665
			-2.36631				1.32539
			-2.36257				1.324
			-2.35879				1.32248
			-2.35495				1.32084
			-2.35105				1.31908
			-2.34708				1.31721
			-2.34304				1.31523
			-2.33893				1.31316
			-2.33472				1.31099
			-2.33044				1.30874
			-2.32606				1.30642
			-2.32159				1.30404
			-2.31702				1.3016
			-2.31236				1.29911
			-2.3076				1.2966
			-2.30274				1.29406
			-2.29779				1.29151
			-2.29274				1.28896
			-2.2876				1.28642
			-2.28236				1.2839
			-2.27703				1.28141
			-2.27162				1.27896
			-2.26612				1.27656
			-2.26053				1.27422
			-2.25488				1.27194
			-2.24915				1.26975
			-2.24335				1.26763
			-2.23748				1.2656
			-2.23156				1.26367
			-2.22559				1.26183
			-2.21957				1.26009
			-2.21351				1.25846
			-2.20741				1.25694
			-2.20128				1.25552
			-2.19513				1.2542
			-2.18896				1.253
			-2.18278				1.25189
			-2.1766				1.25089
			-2.17042				1.24998
			-2.16425				1.24916
			-2.15809				1.24843
			-2.15195				1.24777
			-2.14584				1.24719
			-2.13976				1.24668
			-2.13372				1.24622
			-2.12772				1.24581
			-2.12178				1.24544
			-2.11589				1.24509
			-2.11006				1.24477
			-2.1043				1.24446
			-2.09861				1.24416
			-2.093				1.24384
			-2.08748				1.24351
			-2.08204				1.24315
			-2.07668				1.24276
			-2.07143				1.24232
			-2.06627				1.24183
			-2.06121				1.24127
			-2.05625				1.24066
			-2.0514				1.23996
			-2.04665				1.23919
			-2.042				1.23833
			-2.03746				1.23738
			-2.03302				1.23634
			-2.02867				1.2352
			-2.02443				1.23396
			-2.02027				1.23261
			-2.01621				1.23117
			-2.01222				1.22961
			-2.00831				1.22796
			-2.00446				1.2262
			-2.00068				1.22434
			-1.99694				1.22239
			-1.99325				1.22034
			-1.98959				1.21819
			-1.98594				1.21596
			-1.98231				1.21364
			-1.97868				1.21125
			-1.97503				1.20878
			-1.97136				1.20625
			-1.96765				1.20366
			-1.9639				1.20101
			-1.96009				1.19832
			-1.95621				1.19559
			-1.95225				1.19282
			-1.94821				1.19003
			-1.94407				1.18723
			-1.93983				1.18442
			-1.93548				1.1816
			-1.93102				1.1788
			-1.92643				1.176
			-1.92172				1.17324
			-1.91688				1.1705
			-1.9119				1.1678
			-1.9068				1.16515
			-1.90157				1.16255
			-1.89621				1.16002
			-1.89072				1.15755
			-1.88511				1.15516
			-1.87938				1.15285
			-1.87353				1.15063
			-1.86758				1.1485
			-1.86154				1.14648
			-1.8554				1.14455
			-1.84918				1.14274
			-1.84289				1.14104
			-1.83654				1.13946
			-1.83013				1.138
			-1.82369				1.13667
			-1.81722				1.13545
			-1.81072				1.13436
			-1.80422				1.1334
			-1.79772				1.13257
			-1.79123				1.13186
			-1.78477				1.13127
			-1.77834				1.1308
			-1.77195				1.13046
			-1.76562				1.13022
			-1.75934				1.1301
			-1.75312				1.13008
			-1.74698				1.13016
			-1.74092				1.13034
			-1.73494				1.1306
			-1.72905				1.13094
			-1.72325				1.13135
			-1.71754				1.13182
			-1.71193				1.13234
			-1.70642				1.1329
			-1.701				1.1335
			-1.69567				1.13413
			-1.69044				1.13476
			-1.68531				1.1354
			-1.68026				1.13604
			-1.6753				1.13665
			-1.67042				1.13724
			-1.66562				1.13779
			-1.66089				1.1383
			-1.65622				1.13875
			-1.65162				1.13913
			-1.64707				1.13944
			-1.64257				1.13967
			-1.63811				1.13982
			-1.63368				1.13987
			-1.62928				1.13982
			-1.62489				1.13967
			-1.62051				1.13941
			-1.61613				1.13905
			-1.61175				1.13857
			-1.60736				1.13799
			-1.60294				1.13729
			-1.59849				1.13649
			-1.59401				1.13558
			-1.58949				1.13456
			-1.58492				1.13346
			-1.58029				1.13226
			-1.57561				1.13097
			-1.57086				1.12962
			-1.56604				1.12819
			-1.56114				1.1267
			-1.55617				1.12517
			-1.55112				1.1236
			-1.54598				1.122
			-1.54076				1.12039
			-1.53545				1.11877
			-1.53005				1.11717
			-1.52457				1.11559
			-1.51899				1.11404
			-1.51333				1.11254
			-1.50758				1.11111
			-1.50175				1.10975
			-1.49582				1.10847
			-1.48982				1.10729
			-1.48374				1.10623
			-1.47757				1.10528
			-1.47134				1.10446
			-1.46503				1.10378
			-1.45866				1.10324
			-1.45222				1.10286
			-1.44572				1.10264
			-1.43917				1.10259
			-1.43257				1.1027
			-1.42592				1.10298
			-1.41923				1.10344
			-1.41251				1.10407
			-1.40576				1.10488
			-1.39898				1.10585
			-1.39218				1.10699
			-1.38537				1.1083
			-1.37854				1.10976
			-1.37172				1.11137
			-1.36489				1.11313
			-1.35808				1.11503
			-1.35127				1.11705
			-1.34449				1.11918
			-1.33772				1.12142
			-1.33098				1.12376
			-1.32428				1.12618
			-1.31761				1.12868
			-1.31099				1.13123
			-1.30441				1.13383
			-1.29788				1.13647
			-1.29141				1.13913
			-1.285				1.1418
			-1.27865				1.14447
			-1.27236				1.14713
			-1.26614				1.14977
			-1.26				1.15237
			-1.25392				1.15493
			-1.24792				1.15744
			-1.242				1.15988
			-1.23615				1.16226
			-1.23038				1.16455
			-1.22468				1.16677
			-1.21906				1.1689
			-1.2135				1.17093
			-1.20802				1.17287
			-1.20259				1.17471
			-1.19723				1.17645
			-1.19193				1.17808
			-1.18667				1.17961
			-1.18146				1.18105
			-1.17629				1.18238
			-1.17115				1.18361
			-1.16603				1.18474
			-1.16092				1.18579
			-1.15582				1.18675
			-1.15072				1.18762
			-1.14561				1.18842
			-1.14048				1.18915
			-1.13532				1.18981
			-1.13012				1.19041
			-1.12487				1.19097
			-1.11958				1.19148
			-1.11421				1.19195
			-1.10878				1.1924
			-1.10327				1.19282
			-1.09768				1.19324
			-1.09199				1.19365
			-1.08621				1.19407
			-1.08033				1.1945
			-1.07435				1.19496
			-1.06826				1.19544
			-1.06206				1.19597
			-1.05575				1.19654
			-1.04933				1.19717
			-1.0428				1.19786
			-1.03616				1.19862
			-1.02942				1.19946
			-1.02258				1.20039
			-1.01563				1.20142
			-1.0086				1.20254
			-1.00148				1.20377
			-0.994274				1.20511
			-0.986998				1.20657
			-0.979656				1.20815
			-0.972256				1.20986
			-0.964808				1.2117
			-0.95732				1.21367
			-0.9498				1.21578
			-0.942259				1.21803
			-0.934706				1.22041
			-0.92715				1.22293
			-0.919601				1.22558
			-0.912067				1.22838
			-0.904558				1.2313
			-0.897081				1.23436
			-0.889645				1.23754
			-0.882259				1.24084
			-0.874928				1.24426
			-0.86766				1.24779
			-0.86046				1.25141
			-0.853335				1.25513
			-0.846289				1.25894
			-0.839326				1.26282
			-0.83245				1.26676
			-0.825664				1.27076
			-0.818969				1.2748
			-0.812368				1.27887
			-0.805861				1.28296
			-0.799449				1.28706
			-0.79313				1.29115
			-0.786904				1.29521
			-0.780769				1.29925
			-0.774724				1.30324
			-0.768765				1.30717
			-0.762889				1.31103
			-0.757092				1.31481
			-0.751371				1.31849
			-0.74572				1.32206
			-0.740135				1.32552
			-0.734612				1.32885
			-0.729143				1.33204
			-0.723724				1.33509
			-0.718349				1.33799
			-0.713012				1.34074
			-0.707707				1.34332
			-0.702428				1.34573
			-0.697168				1.34798
			-0.691922				1.35006
			-0.686685				1.35197
			-0.681449				1.35371
			-0.676211				1.35529
			-0.670964				1.35671
			-0.665703				1.35797
			-0.660424				1.35908
			-0.655123				1.36005
			-0.649795				1.36089
			-0.644436				1.36161
			-0.639044				1.36221
			-0.633615				1.36272
			-0.628147				1.36313
			-0.622638				1.36348
			-0.617086				1.36376
			-0.61149				1.36399
			-0.605849				1.3642
			-0.600162				1.36439
			-0.59443				1.36458
			-0.588653				1.36478
			-0.582832				1.36501
			-0.576967				1.36529
			-0.57106				1.36562
			-0.565113				1.36603
			-0.559129				1.36652
			-0.553108				1.36711
			-0.547055				1.36781
			-0.540972				1.36863
			-0.534862				1.36959
			-0.528729				1.37068
			-0.522576				1.37191
			-0.516407				1.3733
			-0.510227				1.37485
			-0.504039				1.37655
			-0.497847				1.37842
			-0.491656				1.38044
			-0.485471				1.38263
			-0.479296				1.38497
			-0.473135				1.38746
			-0.466994				1.3901
			-0.460876				1.39288
			-0.454787				1.39579
			-0.448732				1.39883
			-0.442714				1.40198
			-0.436739				1.40522
			-0.43081				1.40856
			-0.424933				1.41197
			-0.419112				1.41545
			-0.413351				1.41897
			-0.407654				1.42252
			-0.402026				1.4261
			-0.396469				1.42967
			-0.390988				1.43324
			-0.385585				1.43678
			-0.380265				1.44028
			-0.375029				1.44372
			-0.369881				1.4471
			-0.364822				1.45039
			-0.359855				1.45359
			-0.35498				1.45668
			-0.350199				1.45965
			-0.345513				1.4625
			-0.34092				1.46521
			-0.336422				1.46778
			-0.332016				1.47019
			-0.327702				1.47244
			-0.323477				1.47453
			-0.319338				1.47645
			-0.315283				1.4782
			-0.311309				1.47978
			-0.307409				1.48119
			-0.30358				1.48242
			-0.299817				1.48348
			-0.296114				1.48437
			-0.292464				1.4851
			-0.288861				1.48566
			-0.285299				1.48607
			-0.28177				1.48632
			-0.278267				1.48643
			-0.274783				1.4864
			-0.27131				1.48625
			-0.26784				1.48597
			-0.264366				1.48557
			-0.260881				1.48507
			-0.257377				1.48448
			-0.253848				1.4838
			-0.250287				1.48304
			-0.246688				1.48222
			-0.243046				1.48134
			-0.239354				1.48042
			-0.235609				1.47946
			-0.231806				1.47848
			-0.227941				1.47749
			-0.224013				1.47649
			-0.220019				1.4755
			-0.215958				1.47452
			-0.211829				1.47358
			-0.207633				1.47267
			-0.203369				1.47181
			-0.19904				1.47101
			-0.194648				1.47027
			-0.190196				1.46962
			-0.185688				1.46904
			-0.181127				1.46856
			-0.176519				1.46819
			-0.171869				1.46792
			-0.167182				1.46776
			-0.162464				1.46773
			-0.157723				1.46783
			-0.152965				1.46805
			-0.148196				1.46842
			-0.143424				1.46892
			-0.138656				1.46956
			-0.133898				1.47034
			-0.129159				1.47127
			-0.124445				1.47234
			-0.119763				1.47355
			-0.115118				1.4749
			-0.110518				1.47638
			-0.105968				1.47799
			-0.101474				1.47973
			-0.0970404				1.48158
			-0.092672				1.48355
			-0.0883727				1.48562
			-0.0841462				1.48778
			-0.0799955				1.49003
			-0.075923				1.49235
			-0.0719305				1.49472
			-0.0680195				1.49715
			-0.0641908				1.49961
			-0.0604445				1.50209
			-0.0567803				1.50458
			-0.0531975				1.50707
			-0.0496946				1.50953
			-0.0462699				1.51196
			-0.0429209				1.51434
			-0.0396449				1.51665
			-0.0364388				1.51888
			-0.033299				1.52102
			-0.0302214				1.52306
			-0.0272018				1.52498
			-0.0242357				1.52676
			-0.0213181				1.52841
			-0.0184441				1.5299
			-0.0156084				1.53123
			-0.0128055				1.5324
			-0.01003				1.53338
			-0.00727637				1.53419
			-0.00453892				1.53482
			-0.0018121				1.53526
			0.000909628				1.53551
			0.00363172				1.53558
			0.00635951				1.53547
			0.00909817				1.53517
			0.0118527				1.53471
			0.0146278				1.53407
			0.0174282				1.53328
			0.0202579				1.53234
			0.0231211				1.53127
			0.0260213				1.53007
			0.0289619				1.52877
			0.031946				1.52736
			0.0349762				1.52588
			0.0380549				1.52434
			0.0411839				1.52276
			0.0443649				1.52115
			0.0475992				1.51953
			0.0508876				1.51792
			0.0542307				1.51635
			0.0576286				1.51482
			0.0610813				1.51337
			0.0645882				1.512
			0.0681487				1.51074
			0.0717615				1.50961
			0.0754253				1.50861
			0.0791385				1.50777
			0.0828991				1.50711
			0.086705				1.50663
			0.0905538				1.50635
			0.0944428				1.50628
			0.0983693				1.50642
			0.10233				1.5068
			0.106322				1.5074
			0.110342				1.50824
			0.114387				1.50932
			0.118453				1.51064
			0.122535				1.5122
			0.126632				1.51399
			0.130738				1.51602
			0.13485				1.51827
			0.138964				1.52073
			0.143076				1.5234
			0.147182				1.52626
			0.151278				1.52931
			0.155361				1.53253
			0.159426				1.5359
			0.163471				1.53941
			0.16749				1.54304
			0.171481				1.54678
			0.175439				1.55061
			0.179363				1.55451
			0.183248				1.55846
			0.187092				1.56245
			0.190891				1.56645
			0.194644				1.57046
			0.198348				1.57444
			0.202				1.5784
			0.205599				1.5823
			0.209144				1.58614
			0.212634				1.5899
			0.216067				1.59357
			0.219444				1.59714
			0.222764				1.60059
			0.226027				1.60391
			0.229236				1.60711
			0.23239				1.61016
			0.235493				1.61307
			0.238545				1.61583
			0.24155				1.61844
			0.244511				1.62088
			0.24743				1.62318
			0.250313				1.62531
			0.253164				1.62729
			0.255987				1.62912
			0.258786				1.6308
			0.261568				1.63234
			0.264338				1.63374
			0.267102				1.635
			0.269865				1.63615
			0.272633				1.63718
			0.275413				1.6381
			0.278211				1.63892
			0.281032				1.63965
			0.283882				1.6403
			0.286768				1.64089
			0.289693				1.64142
			0.292665				1.6419
			0.295687				1.64234
			0.298765				1.64276
			0.301902				1.64316
			0.305101				1.64356
			0.308367				1.64396
			0.311701				1.64439
			0.315107				1.64484
			0.318584				1.64534
			0.322135				1.64588
			0.325759				1.64649
			0.329457				1.64718
			0.333227				1.64794
			0.337068				1.6488
			0.340979				1.64977
			0.344956				1.65085
			0.348996				1.65205
			0.353096				1.65338
			0.357252				1.65486
			0.36146				1.65648
			0.365714				1.65825
			0.370009				1.66019
			0.374341				1.66229
			0.378702				1.66456
			0.383088				1.667
			0.387493				1.66962
			0.39191				1.67242
			0.396333				1.6754
			0.400756				1.67855
			0.405174				1.68189
			0.409581				1.6854
			0.41397				1.68908
			0.418337				1.69292
			0.422676				1.69692
			0.426983				1.70108
			0.431253				1.70538
			0.435482				1.70981
			0.439666				1.71437
			0.443802				1.71904
			0.447888				1.7238
			0.45192				1.72865
			0.455896				1.73356
			0.459816				1.73853
			0.463677				1.74354
			0.46748				1.74856
			0.471224				1.75359
			0.474909				1.7586
			0.478537				1.76357
			0.482107				1.76849
			0.485623				1.77333
			0.489084				1.77809
			0.492495				1.78273
			0.495856				1.78725
			0.499172				1.79162
			0.502445				1.79583
			0.505678				1.79986
			0.508876				1.8037
			0.512042				1.80733
			0.515179				1.81075
			0.518293				1.81394
			0.521387				1.81689
			0.524465				1.8196
			0.527532				1.82205
			0.530592				1.82426
			0.53365				1.8262
			0.536709				1.82789
			0.539773				1.82933
			0.542847				1.83052
			0.545934				1.83146
			0.549038				1.83217
			0.552163				1.83265
			0.555312				1.83292
			0.558487				1.83298
			0.561692				1.83286
			0.564928				1.83256
			0.568199				1.83211
			0.571507				1.83153
			0.574852				1.83082
			0.578236				1.83003
			0.581661				1.82916
			0.585126				1.82824
			0.588634				1.82728
			0.592183				1.82633
			0.595774				1.82538
			0.599406				1.82448
			0.603079				1.82364
			0.606791				1.82288
			0.610542				1.82223
			0.614329				1.82171
			0.618153				1.82132
			0.622009				1.8211
			0.625897				1.82106
			0.629813				1.82121
			0.633756				1.82157
			0.637722				1.82215
			0.64171				1.82295
			0.645715				1.82399
			0.649734				1.82526
			0.653765				1.82677
			0.657804				1.82853
			0.661847				1.83052
			0.665892				1.83275
			0.669933				1.83521
			0.673969				1.83789
			0.677994				1.84078
			0.682006				1.84387
			0.686001				1.84715
			0.689975				1.85059
			0.693924				1.85419
			0.697845				1.85792
			0.701734				1.86177
			0.705588				1.86571
			0.709403				1.86973
			0.713177				1.8738
			0.716906				1.87791
			0.720587				1.88202
			0.724218				1.88613
			0.727795				1.8902
			0.731317				1.89421
			0.73478				1.89816
			0.738184				1.90201
			0.741527				1.90575
			0.744806				1.90936
			0.748021				1.91282
			0.751172				1.91612
			0.754257				1.91925
			0.757276				1.92218
			0.760231				1.92492
			0.76312				1.92745
			0.765946				1.92977
			0.768709				1.93186
			0.771412				1.93372
			0.774055				1.93536
			0.776642				1.93676
			0.779176				1.93793
			0.781659				1.93887
			0.784094				1.93958
			0.786486				1.94007
			0.788838				1.94034
			0.791155				1.9404
			0.793441				1.94026
			0.7957				1.93992
			0.797937				1.9394
			0.800157				1.9387
			0.802364				1.93784
			0.804564				1.93683
			0.80676				1.93567
			0.808958				1.93439
			0.811162				1.933
			0.813377				1.9315
			0.815606				1.92991
			0.817853				1.92825
			0.820122				1.92653
			0.822416				1.92475
			0.824739				1.92294
			0.827091				1.92111
			0.829476				1.91927
			0.831894				1.91743
			0.834348				1.91562
			0.836837				1.91383
			0.839362				1.91208
			0.841923				1.9104
			0.844519				1.90878
			0.847148				1.90725
			0.849809				1.90581
			0.8525				1.90448
			0.855218				1.90327
			0.85796				1.90219
			0.860723				1.90125
			0.863503				1.90046
			0.866296				1.89982
			0.869099				1.89936
			0.871905				1.89907
			0.874711				1.89896
			0.877512				1.89903
			0.880303				1.8993
			0.883079				1.89976
			0.885834				1.90041
			0.888565				1.90126
			0.891266				1.90231
			0.893931				1.90355
			0.896558				1.90498
			0.89914				1.9066
			0.901674				1.90839
			0.904156				1.91035
			0.906582				1.91247
			0.908949				1.91475
			0.911253				1.91716
			0.913491				1.9197
			0.915662				1.92234
			0.917763				1.92508
			0.919793				1.9279
			0.921749				1.93077
			0.923632				1.93369
[truncated: 418,003+ more rows]

## Sheet: Fig2-S1G
		TN
			Before	MIRS	After
			5.22865	3.8803	4.66603
			4.60857	2.88771	3.77205
			3.40571	8.39409	3.76567
			4.56727	5.97611	4.34311
			6.03333	11.0678	10.5463
			5.10523	6.87065	5.63581
		NT
			Before	MIRS	After
			-1.67906	1.3895	-2.205
			-1.2683	0.8524	-0.716197
			0.281	0.756	-0.789
			-0.26312	1.0388	-0.278598
			-1.57167	5.38917	-1.15264
			-0.98492	3.226	-0.2746

## Sheet: Fig2-S1H
		TN
			Before	MIRS	After
			2.25254	2.80634	2.08353
			1.6726	0.5592	2.01817
			1.21798	0.927095	1.70033
			1.73416	0.675042	1.74753
			3.07356	1.85922	3.14543
			2.05005	1.11256	2.28718
		NT
			Before	MIRS	After
			1.21091	0.504708	1.4153
			1.36004	1.58389	1.58959
			4.59591	1.51879	4.82877
			2.02353	1.00551	1.55063
			3.11642	2.05472	3.05195
			2.46717	0.978927	2.78821
