# Supplementary material for: Sensory input-dependent gain modulation of the optokinetic nystagmus by mid-infrared stimulation in pigeons
Source: eLife. 2023 Feb 28;12:e78729. doi: 10.7554/eLife.78729 (PMC9977280; doi:10.7554/eLife.78729)
Supplement: Figure 2—source data 1. [file elife-78729-fig2-data1.xlsx]

## Sheet: Fig2A
		TN		NT
		Before-EOG (deg)	MIRS-EOG(deg)	Before-EOG (deg)	MIRS-EOG(deg)
		5.96054	0.500627	-0.628586	1.40702
		5.96166	0.508492	-0.62671	1.40774
		5.9628	0.516342	-0.624826	1.40847
		5.96396	0.524175	-0.622935	1.40919
		5.96513	0.531991	-0.621037	1.40991
		5.96632	0.539791	-0.619132	1.41063
		5.96753	0.547574	-0.61722	1.41135
		5.96875	0.55534	-0.6153	1.41207
		5.96999	0.56309	-0.613374	1.4128
		5.97125	0.570821	-0.611441	1.41352
		5.97252	0.578536	-0.609502	1.41424
		5.9738	0.586233	-0.607555	1.41497
		5.9751	0.593913	-0.605602	1.41569
		5.97642	0.601575	-0.603643	1.41642
		5.97775	0.60922	-0.601677	1.41714
		5.97909	0.616848	-0.599704	1.41787
		5.98045	0.624458	-0.597726	1.41859
		5.98182	0.632051	-0.595741	1.41932
		5.9832	0.639627	-0.59375	1.42004
		5.9846	0.647186	-0.591753	1.42077
		5.98601	0.654728	-0.589751	1.4215
		5.98743	0.662252	-0.587742	1.42222
		5.98886	0.66976	-0.585729	1.42295
		5.99031	0.677252	-0.58371	1.42368
		5.99177	0.684727	-0.581686	1.42441
		5.99323	0.692185	-0.579657	1.42514
		5.99471	0.699628	-0.577623	1.42587
		5.9962	0.707054	-0.575585	1.4266
		5.9977	0.714465	-0.573542	1.42733
		5.99921	0.72186	-0.571496	1.42806
		6.00073	0.72924	-0.569446	1.4288
		6.00226	0.736604	-0.567392	1.42953
		6.00381	0.743954	-0.565335	1.43026
		6.00535	0.751289	-0.563275	1.431
		6.00691	0.758609	-0.561213	1.43173
		6.00848	0.765915	-0.559147	1.43247
		6.01006	0.773207	-0.55708	1.4332
		6.01164	0.780485	-0.55501	1.43394
		6.01323	0.78775	-0.552939	1.43468
		6.01484	0.795002	-0.550867	1.43541
		6.01644	0.80224	-0.548793	1.43615
		6.01806	0.809466	-0.546719	1.43689
		6.01968	0.816678	-0.544643	1.43763
		6.02131	0.823879	-0.542568	1.43837
		6.02295	0.831067	-0.540492	1.43912
		6.02459	0.838243	-0.538417	1.43986
		6.02624	0.845408	-0.536341	1.4406
		6.0279	0.85256	-0.534267	1.44135
		6.02956	0.859702	-0.532193	1.44209
		6.03122	0.866832	-0.530121	1.44284
		6.03289	0.873951	-0.52805	1.44358
		6.03457	0.881059	-0.52598	1.44433
		6.03625	0.888156	-0.523912	1.44508
		6.03793	0.895243	-0.521847	1.44583
		6.03962	0.90232	-0.519783	1.44658
		6.04131	0.909387	-0.517722	1.44733
		6.043	0.916445	-0.515664	1.44808
		6.0447	0.923492	-0.513608	1.44883
		6.0464	0.93053	-0.511556	1.44959
		6.0481	0.937559	-0.509507	1.45034
		6.0498	0.944579	-0.507461	1.4511
		6.0515	0.95159	-0.505418	1.45185
		6.05321	0.958593	-0.50338	1.45261
		6.05492	0.965587	-0.501345	1.45337
		6.05662	0.972573	-0.499314	1.45413
		6.05833	0.97955	-0.497287	1.45489
		6.06004	0.98652	-0.495264	1.45565
		6.06175	0.993483	-0.493246	1.45641
		6.06346	1.00044	-0.491232	1.45717
		6.06516	1.00738	-0.489223	1.45794
		6.06687	1.01432	-0.487218	1.4587
		6.06857	1.02126	-0.485219	1.45947
		6.07028	1.02818	-0.483225	1.46023
		6.07198	1.0351	-0.481235	1.461
		6.07368	1.04202	-0.479252	1.46177
		6.07538	1.04892	-0.477274	1.46254
		6.07707	1.05582	-0.475302	1.46331
		6.07877	1.06272	-0.473336	1.46408
		6.08046	1.06961	-0.471376	1.46486
		6.08215	1.07649	-0.469422	1.46563
		6.08383	1.08337	-0.467475	1.46641
		6.08551	1.09024	-0.465534	1.46718
		6.08719	1.09711	-0.463601	1.46796
		6.08887	1.10397	-0.461674	1.46874
		6.09054	1.11083	-0.459755	1.46952
		6.0922	1.11768	-0.457843	1.4703
		6.09387	1.12453	-0.455938	1.47108
		6.09553	1.13137	-0.454041	1.47187
		6.09719	1.13821	-0.452152	1.47265
		6.09884	1.14505	-0.45027	1.47344
		6.10049	1.15188	-0.448397	1.47422
		6.10213	1.15871	-0.446531	1.47501
		6.10377	1.16554	-0.444674	1.4758
		6.10541	1.17236	-0.442824	1.47659
		6.10704	1.17918	-0.440983	1.47738
		6.10866	1.186	-0.439151	1.47817
		6.11028	1.19281	-0.437326	1.47896
		6.1119	1.19962	-0.435511	1.47976
		6.11351	1.20643	-0.433703	1.48055
		6.11512	1.21323	-0.431904	1.48135
		6.11673	1.22003	-0.430114	1.48215
		6.11832	1.22683	-0.428332	1.48295
		6.11992	1.23362	-0.426558	1.48375
		6.12151	1.24041	-0.424793	1.48455
		6.12309	1.2472	-0.423036	1.48535
		6.12467	1.25398	-0.421288	1.48616
		6.12625	1.26076	-0.419547	1.48696
		6.12782	1.26754	-0.417815	1.48777
		6.12938	1.27431	-0.416091	1.48857
		6.13094	1.28108	-0.414374	1.48938
		6.1325	1.28785	-0.412666	1.49019
		6.13405	1.29461	-0.410964	1.491
		6.1356	1.30136	-0.40927	1.49182
		6.13714	1.30812	-0.407583	1.49263
		6.13868	1.31487	-0.405903	1.49344
		6.14021	1.32161	-0.40423	1.49426
		6.14174	1.32835	-0.402563	1.49508
		6.14327	1.33509	-0.400902	1.4959
		6.14479	1.34182	-0.399248	1.49672
		6.1463	1.34855	-0.397599	1.49754
		6.14782	1.35527	-0.395955	1.49836
		6.14932	1.36199	-0.394317	1.49918
		6.15083	1.3687	-0.392685	1.50001
		6.15233	1.3754	-0.391057	1.50083
		6.15383	1.38211	-0.389433	1.50166
		6.15532	1.3888	-0.387815	1.50249
		6.15681	1.39549	-0.3862	1.50332
		6.15829	1.40218	-0.38459	1.50415
		6.15978	1.40886	-0.382984	1.50499
		6.16125	1.41554	-0.381382	1.50582
		6.16273	1.42221	-0.379783	1.50666
		6.1642	1.42887	-0.378188	1.5075
		6.16567	1.43553	-0.376596	1.50833
		6.16714	1.44218	-0.375007	1.50917
		6.16861	1.44882	-0.373422	1.51002
		6.17007	1.45546	-0.371839	1.51086
		6.17153	1.4621	-0.370259	1.5117
		6.17299	1.46872	-0.368682	1.51255
		6.17445	1.47535	-0.367107	1.5134
		6.17591	1.48196	-0.365535	1.51425
		6.17736	1.48857	-0.363965	1.5151
		6.17881	1.49518	-0.362398	1.51595
		6.18026	1.50177	-0.360832	1.51681
		6.18171	1.50836	-0.359269	1.51766
		6.18316	1.51495	-0.357708	1.51852
		6.18461	1.52153	-0.35615	1.51938
		6.18606	1.52811	-0.354593	1.52024
		6.1875	1.53467	-0.353039	1.5211
		6.18895	1.54124	-0.351486	1.52196
		6.19039	1.54779	-0.349936	1.52283
		6.19183	1.55434	-0.348389	1.5237
		6.19327	1.56089	-0.346843	1.52457
		6.19471	1.56743	-0.345301	1.52544
		6.19615	1.57397	-0.34376	1.52631
		6.19759	1.5805	-0.342222	1.52718
		6.19902	1.58702	-0.340687	1.52806
		6.20046	1.59354	-0.339155	1.52894
		6.20189	1.60006	-0.337626	1.52982
		6.20332	1.60657	-0.3361	1.5307
		6.20475	1.61307	-0.334577	1.53158
		6.20618	1.61957	-0.333058	1.53246
		6.20761	1.62607	-0.331542	1.53335
		6.20903	1.63256	-0.33003	1.53424
		6.21045	1.63905	-0.328521	1.53513
		6.21187	1.64553	-0.327016	1.53602
		6.21329	1.65202	-0.325516	1.53692
		6.2147	1.65849	-0.324019	1.53781
		6.21612	1.66497	-0.322527	1.53871
		6.21753	1.67144	-0.321039	1.53961
		6.21893	1.67791	-0.319556	1.54052
		6.22033	1.68437	-0.318078	1.54142
		6.22173	1.69084	-0.316605	1.54233
		6.22313	1.6973	-0.315137	1.54324
		6.22452	1.70376	-0.313674	1.54415
		6.22591	1.71021	-0.312217	1.54506
		6.22729	1.71667	-0.310766	1.54597
		6.22867	1.72312	-0.309321	1.54689
		6.23005	1.72958	-0.307882	1.54781
		6.23142	1.73603	-0.306449	1.54873
		6.23278	1.74248	-0.305024	1.54966
		6.23414	1.74893	-0.303606	1.55058
		6.23549	1.75538	-0.302195	1.55151
		6.23684	1.76183	-0.300791	1.55244
		6.23818	1.76828	-0.299396	1.55338
		6.23952	1.77473	-0.298009	1.55431
		6.24085	1.78119	-0.29663	1.55525
		6.24218	1.78764	-0.29526	1.55619
		6.2435	1.79409	-0.293898	1.55713
		6.24481	1.80055	-0.292546	1.55808
		6.24611	1.80701	-0.291204	1.55903
		6.24741	1.81347	-0.289871	1.55998
		6.2487	1.81993	-0.288549	1.56093
		6.24998	1.82639	-0.287237	1.56188
		6.25126	1.83286	-0.285935	1.56284
		6.25252	1.83933	-0.284644	1.5638
		6.25378	1.84581	-0.283365	1.56477
		6.25503	1.85228	-0.282097	1.56573
		6.25628	1.85877	-0.280841	1.5667
		6.25751	1.86525	-0.279596	1.56767
		6.25874	1.87174	-0.278364	1.56865
		6.25995	1.87824	-0.277144	1.56963
		6.26116	1.88474	-0.275938	1.57061
		6.26236	1.89125	-0.274744	1.57159
		6.26355	1.89776	-0.273563	1.57257
		6.26472	1.90427	-0.272396	1.57356
		6.26589	1.9108	-0.271242	1.57455
		6.26705	1.91732	-0.270103	1.57555
		6.2682	1.92386	-0.268977	1.57655
		6.26934	1.9304	-0.267866	1.57755
		6.27047	1.93694	-0.266769	1.57855
		6.27159	1.9435	-0.265686	1.57956
		6.2727	1.95006	-0.264619	1.58057
		6.27379	1.95662	-0.263566	1.58158
		6.27488	1.9632	-0.262528	1.58259
		6.27596	1.96978	-0.261506	1.58361
		6.27702	1.97637	-0.260499	1.58464
		6.27807	1.98296	-0.259507	1.58566
		6.27912	1.98957	-0.258531	1.58669
		6.28015	1.99618	-0.25757	1.58772
		6.28117	2.00279	-0.256625	1.58876
		6.28218	2.00942	-0.255696	1.5898
		6.28317	2.01606	-0.254784	1.59084
		6.28416	2.0227	-0.253887	1.59189
		6.28513	2.02935	-0.253006	1.59294
		6.2861	2.03601	-0.252142	1.59399
		6.28705	2.04268	-0.251294	1.59504
		6.28799	2.04935	-0.250463	1.59611
		6.28891	2.05603	-0.249648	1.59717
		6.28983	2.06273	-0.248849	1.59824
		6.29073	2.06943	-0.248068	1.59931
		6.29163	2.07614	-0.247303	1.60038
		6.29251	2.08286	-0.246555	1.60146
		6.29338	2.08958	-0.245823	1.60255
		6.29424	2.09632	-0.245108	1.60363
		6.29509	2.10307	-0.244411	1.60472
		6.29593	2.10982	-0.24373	1.60582
		6.29675	2.11658	-0.243065	1.60692
		6.29757	2.12336	-0.242418	1.60802
		6.29838	2.13014	-0.241788	1.60913
		6.29917	2.13693	-0.241175	1.61024
		6.29996	2.14373	-0.240578	1.61135
		6.30073	2.15054	-0.239999	1.61247
		6.30149	2.15736	-0.239436	1.6136
		6.30225	2.16419	-0.23889	1.61472
		6.30299	2.17103	-0.238362	1.61586
		6.30372	2.17787	-0.23785	1.61699
		6.30445	2.18473	-0.237355	1.61814
		6.30516	2.1916	-0.236877	1.61928
		6.30586	2.19848	-0.236415	1.62043
		6.30655	2.20536	-0.23597	1.62159
		6.30724	2.21226	-0.235543	1.62275
		6.30791	2.21916	-0.235131	1.62391
		6.30857	2.22608	-0.234737	1.62508
		6.30922	2.233	-0.234359	1.62625
		6.30987	2.23994	-0.233997	1.62743
		6.3105	2.24688	-0.233652	1.62862
		6.31112	2.25384	-0.233323	1.6298
		6.31174	2.2608	-0.233011	1.631
		6.31234	2.26778	-0.232715	1.6322
		6.31293	2.27476	-0.232434	1.6334
		6.31351	2.28176	-0.232169	1.63461
		6.31409	2.28876	-0.23192	1.63582
		6.31465	2.29578	-0.231687	1.63704
		6.3152	2.3028	-0.231468	1.63827
		6.31574	2.30984	-0.231265	1.63949
		6.31627	2.31689	-0.231076	1.64073
		6.31679	2.32394	-0.230902	1.64197
		6.3173	2.33101	-0.230742	1.64321
		6.3178	2.33809	-0.230596	1.64447
		6.31828	2.34518	-0.230464	1.64572
		6.31876	2.35228	-0.230346	1.64698
		6.31922	2.35939	-0.230242	1.64825
		6.31968	2.36651	-0.230151	1.64952
		6.32012	2.37364	-0.230073	1.6508
		6.32055	2.38079	-0.230008	1.65209
		6.32097	2.38794	-0.229955	1.65338
		6.32137	2.39511	-0.229915	1.65467
		6.32176	2.40229	-0.229887	1.65598
		6.32214	2.40947	-0.229871	1.65728
		6.32251	2.41667	-0.229866	1.6586
		6.32286	2.42388	-0.229873	1.65992
		6.32321	2.43111	-0.229891	1.66124
		6.32353	2.43834	-0.229919	1.66257
		6.32385	2.44558	-0.229958	1.66391
		6.32415	2.45284	-0.230007	1.66526
		6.32443	2.46011	-0.230066	1.66661
		6.3247	2.46738	-0.230135	1.66796
		6.32496	2.47467	-0.230212	1.66933
		6.3252	2.48197	-0.230298	1.6707
		6.32543	2.48928	-0.230392	1.67207
		6.32563	2.49661	-0.230494	1.67346
		6.32583	2.50394	-0.230604	1.67485
		6.326	2.51128	-0.230721	1.67624
		6.32616	2.51864	-0.230844	1.67764
		6.3263	2.526	-0.230974	1.67905
		6.32642	2.53338	-0.23111	1.68047
		6.32652	2.54077	-0.231252	1.68189
		6.3266	2.54816	-0.231399	1.68332
		6.32667	2.55557	-0.23155	1.68476
		6.32671	2.56299	-0.231706	1.6862
		6.32673	2.57041	-0.231866	1.68765
		6.32673	2.57785	-0.232029	1.68911
		6.3267	2.5853	-0.232195	1.69057
		6.32665	2.59275	-0.232363	1.69205
		6.32658	2.60021	-0.232534	1.69353
		6.32648	2.60768	-0.232706	1.69501
		6.32636	2.61516	-0.232879	1.69651
		6.32621	2.62264	-0.233052	1.69801
		6.32604	2.63013	-0.233226	1.69952
		6.32583	2.63763	-0.233399	1.70103
		6.3256	2.64513	-0.233571	1.70256
		6.32534	2.65264	-0.233742	1.70409
		6.32504	2.66015	-0.23391	1.70563
		6.32472	2.66767	-0.234076	1.70717
		6.32436	2.67519	-0.234239	1.70873
		6.32397	2.68271	-0.234398	1.71029
		6.32355	2.69024	-0.234553	1.71186
		6.32309	2.69777	-0.234704	1.71344
		6.32259	2.7053	-0.234851	1.71502
		6.32206	2.71283	-0.234992	1.71662
		6.32149	2.72036	-0.235128	1.71822
		6.32087	2.72789	-0.235258	1.71983
		6.32022	2.73542	-0.235382	1.72145
		6.31953	2.74294	-0.235499	1.72307
		6.3188	2.75047	-0.23561	1.72471
		6.31802	2.75799	-0.235713	1.72635
		6.3172	2.76551	-0.235809	1.728
		6.31633	2.77303	-0.235897	1.72966
		6.31541	2.78054	-0.235977	1.73133
		6.31445	2.78805	-0.236049	1.73301
		6.31344	2.79554	-0.236112	1.73469
		6.31238	2.80304	-0.236166	1.73639
		6.31127	2.81052	-0.236211	1.73809
		6.31011	2.818	-0.236247	1.7398
		6.3089	2.82546	-0.236274	1.74152
		6.30763	2.83292	-0.236291	1.74325
		6.30631	2.84037	-0.236298	1.74499
		6.30493	2.8478	-0.236295	1.74673
		6.30349	2.85523	-0.236282	1.74849
		6.302	2.86264	-0.236259	1.75026
		6.30045	2.87003	-0.236226	1.75203
		6.29883	2.87742	-0.236182	1.75381
		6.29716	2.88478	-0.236128	1.7556
		6.29542	2.89213	-0.236063	1.7574
		6.29362	2.89947	-0.235988	1.75922
		6.29176	2.90679	-0.235903	1.76104
		6.28983	2.91409	-0.235808	1.76286
		6.28783	2.92137	-0.235702	1.7647
		6.28577	2.92863	-0.235586	1.76655
		6.28364	2.93587	-0.23546	1.76841
		6.28143	2.94309	-0.235323	1.77028
		6.27916	2.95028	-0.235178	1.77215
		6.27681	2.95746	-0.235022	1.77404
		6.27439	2.96461	-0.234857	1.77593
		6.2719	2.97173	-0.234682	1.77784
		6.26932	2.97883	-0.234498	1.77975
		6.26668	2.98591	-0.234304	1.78168
		6.26395	2.99296	-0.234102	1.78362
		6.26115	2.99997	-0.233891	1.78556
		6.25826	3.00697	-0.233671	1.78751
		6.2553	3.01393	-0.233442	1.78948
		6.25225	3.02086	-0.233205	1.79145
		6.24911	3.02776	-0.232959	1.79344
		6.2459	3.03462	-0.232705	1.79543
		6.24259	3.04146	-0.232443	1.79744
		6.2392	3.04826	-0.232173	1.79946
		6.23573	3.05503	-0.231896	1.80148
		6.23216	3.06176	-0.231612	1.80352
		6.2285	3.06846	-0.23132	1.80556
		6.22475	3.07512	-0.231022	1.80762
		6.22091	3.08174	-0.230717	1.80969
		6.21698	3.08832	-0.230406	1.81177
		6.21294	3.09487	-0.230089	1.81386
		6.20882	3.10137	-0.229766	1.81595
		6.2046	3.10784	-0.229437	1.81806
		6.20027	3.11426	-0.229104	1.82019
		6.19585	3.12064	-0.228766	1.82232
		6.19133	3.12698	-0.228423	1.82446
		6.18671	3.13327	-0.228075	1.82661
		6.18199	3.13951	-0.227724	1.82878
		6.17716	3.14571	-0.227369	1.83095
		6.17223	3.15187	-0.227011	1.83314
		6.16719	3.15797	-0.226649	1.83533
		6.16205	3.16403	-0.226284	1.83754
		6.1568	3.17003	-0.225917	1.83976
		6.15144	3.17599	-0.225548	1.84199
		6.14597	3.18189	-0.225177	1.84423
		6.14039	3.18774	-0.224803	1.84649
		6.1347	3.19354	-0.224429	1.84875
		6.1289	3.19928	-0.224053	1.85103
		6.12298	3.20497	-0.223677	1.85332
		6.11695	3.21061	-0.223299	1.85561
		6.1108	3.21618	-0.222922	1.85792
		6.10453	3.2217	-0.222544	1.86025
		6.09815	3.22716	-0.222166	1.86258
		6.09165	3.23255	-0.221789	1.86493
		6.08503	3.23789	-0.221413	1.86728
		6.07829	3.24317	-0.221037	1.86965
		6.07142	3.24838	-0.220662	1.87203
		6.06443	3.25353	-0.220288	1.87443
		6.05732	3.25861	-0.219916	1.87683
		6.05009	3.26363	-0.219545	1.87925
		6.04273	3.26857	-0.219176	1.88168
		6.03524	3.27346	-0.218809	1.88412
		6.02762	3.27827	-0.218443	1.88657
		6.01988	3.28301	-0.218079	1.88904
		6.01201	3.28768	-0.217718	1.89151
		6.61347	3.29227	-0.217357	1.894
		6.62928	3.29679	-0.216999	1.8965
		6.64531	3.30124	-0.216643	1.89902
		6.66181	3.30561	-0.216288	1.90155
		6.67895	3.3099	-0.215936	1.90408
		6.69686	3.31412	-0.215584	1.90664
		6.71557	3.31825	-0.215235	1.9092
		6.73503	3.3223	-0.214886	1.91178
		6.75509	3.32627	-0.214539	1.91437
		6.77551	3.33016	-0.214193	1.91697
		6.79595	3.33396	-0.213849	1.91958
		6.81602	3.33768	-0.213505	1.92221
		6.8352	3.34131	-0.213162	1.92485
		6.85294	3.34485	-0.212821	1.92751
		6.86855	3.3483	-0.212479	1.93017
		6.88134	3.35166	-0.212139	1.93285
		6.89055	3.35493	-0.211798	1.93554
		6.89553	3.3581	-0.211458	1.93825
		6.89569	3.36118	-0.211118	1.94097
		6.89058	3.36417	-0.210777	1.9437
		6.8799	3.36705	-0.210436	1.94644
		6.86345	3.36984	-0.210095	1.75272
		6.84119	3.37253	0.004024	1.77502
		6.81317	3.37512	-0.000148429	1.79959
		6.77959	3.3776	-0.00282669	1.826
		6.74076	3.37998	-0.00393632	1.85368
		6.69712	3.38226	-0.00333672	1.88197
		6.64923	3.38443	-0.000818271	1.9102
		6.59776	3.38649	0.00387368	1.93777
		6.54345	3.38844	0.0109984	1.96417
		6.48706	3.39029	0.0207781	1.98905
		6.42939	3.39202	0.0333683	2.01215
		6.37122	3.39364	0.0488468	2.03331
		6.31332	3.39514	0.0672152	2.05244
		6.2564	3.39653	0.0883967	2.06949
		6.20112	3.3978	0.112225	2.08444
		6.14799	3.39896	0.138436	2.09737
		6.09741	3.39999	0.166679	2.10837
		6.04961	3.40091	0.196528	2.11763
		6.00468	3.4017	0.227487	2.12542
		5.96255	3.40237	0.259009	2.13203
		5.92302	3.40291	0.290514	2.13778
		5.88588	3.40333	0.321386	2.143
		5.85089	3.40361	0.350966	2.14802
		5.81787	3.40377	0.378559	2.1532
		5.7867	3.4038	0.40347	2.15885
		5.75733	3.40369	0.425067	2.16514
		5.72976	3.40346	0.442832	2.17208
		5.70406	3.40308	0.456413	2.1795
		5.68033	3.40257	0.465635	2.18704
		5.6587	3.40192	0.470482	2.19411
		5.63932	3.40112	0.471079	2.19987
		5.62227	3.40019	0.467666	2.20331
		5.6076	3.39912	0.460611	2.20343
		5.59525	3.39789	0.450415	2.19938
		5.58512	3.39653	0.43771	2.19057
		5.57708	3.39501	0.423216	2.17664
		5.57102	3.39334	0.40768	2.1575
		5.56682	3.39153	0.391823	2.13334
		5.5644	3.38956	0.376324	2.10466
		5.56368	3.38743	0.361826	2.07218
		5.56455	3.38515	0.348946	2.0369
		5.56692	3.38271	0.338249	2.00004
		5.57065	3.38011	0.330197	1.96293
		5.57561	3.37736	0.325057	1.9269
		5.58162	3.37443	0.322823	1.89306
		5.58854	3.37135	0.323205	1.8622
		5.59623	3.3681	0.325689	1.83476
		5.60469	3.36468	0.329654	1.81077
		5.61402	3.36109	0.334448	1.78989
		5.62446	3.35733	0.339438	1.77146
		5.6364	3.35339	0.344052	1.75463
		5.65034	3.34929	0.347832	1.7385
		5.66692	3.345	0.350487	1.72224
		5.68681	3.34054	0.351925	1.70511
		5.71076	3.3359	0.352241	1.68646
		5.73948	3.33108	0.351692	1.6657
		5.77357	3.32607	0.350652	1.64233
		5.81341	3.32088	0.349582	1.61589
		5.85905	3.3155	0.348997	1.586
		5.91033	3.30993	0.349409	1.55237
		5.96696	3.30418	0.351265	1.51484
		6.02862	3.29823	0.354875	1.47337
		6.09495	3.29209	0.360355	1.42801
		6.16553	3.28575	0.367617	1.37884
		6.23985	3.27921	0.376408	1.32585
		6.31729	3.27248	0.386368	1.26886
		6.39715	3.26555	0.397097	1.20748
		6.47864	3.25841	0.408187	1.14122
		6.56093	3.25107	0.41925	1.06959
		6.64313	3.24352	0.429922	0.992193
		6.72437	3.23577	0.439848	0.908737
		6.8038	3.2278	0.448655	0.819053
		6.88058	3.21963	0.455924	0.723108
		6.95387	3.21124	0.4612	0.620969
		7.02291	3.20263	0.464026	0.51273
		7.08694	3.19381	0.463971	0.398506
		7.14525	3.18477	0.46064	0.278541
		7.19714	3.17552	0.45368	0.153328
		7.24194	3.16604	0.442785	0.0236657
		7.27905	3.15633	0.427694	-0.109379
		7.30783	3.1464	0.408197	-0.244577
		7.32766	3.13625	0.384131	-0.38068
		7.33787	3.12586	0.355372	-0.516535
		7.33783	3.11525	0.321795	-0.651127
		7.32698	3.1044	0.28327	-0.783568
		7.30483	3.09332	0.239679	-0.91306
		7.27101	3.082	0.190945	-1.03885
		7.22526	3.07044	0.137057	-1.16023
		7.16748	3.05865	0.0780788	-1.27646
		7.09774	3.04661	0.0141356	-1.38684
		7.01624	3.03433	-0.0545964	-1.49067
		6.92331	3.02181	-0.127909	-1.58733
		6.81935	3.00904	-0.205586	-1.67629
		6.70478	2.99602	-0.287439	-1.75717
		6.57995	2.98275	-0.373361	-1.82972
		6.44509	2.96923	-0.463368	-1.8938
		6.30027	2.95545	-0.55762	-1.94935
		6.1455	2.94143	-0.656405	-1.99635
		5.98085	2.92714	-0.760081	-2.03473
		5.80647	2.9126	-0.869006	-2.0644
		5.62264	2.8978	-0.983489	-2.08515
		5.42968	2.88273	-1.10378	-2.09665
		5.22793	2.8674	-1.23002	-2.09848
		5.01778	2.85181	-1.3622	-2.09009
		4.79987	2.83595	-1.50007	-2.07086
		4.57513	2.81983	-1.64305	-2.04009
		4.34484	2.80343	-1.79021	-1.99701
		4.11054	2.78677	-1.94028	-1.94087
		3.87386	2.76983	-2.09178	-1.87096
		3.63647	2.75262	-2.24308	-1.78673
		3.39991	2.73513	-2.39252	-1.68785
		3.16565	2.71737	-2.53846	-1.57429
		2.93503	2.69933	-2.67927	-1.44631
		2.70931	2.68101	-2.81342	-1.30446
		2.48968	2.66241	-2.93947	-1.14955
		2.2773	2.64353	-3.05614	-0.982665
		2.07326	2.62436	-3.16236	-0.805082
		1.87854	2.60491	-3.2573	-0.618255
		1.69396	2.58518	-3.34038	-0.423742
		1.52011	2.56515	-3.41129	-0.223176
		1.35741	2.54484	-3.46996	-0.0182187
		1.20612	2.52424	-3.51654	0.18949
		1.06644	2.50334	-3.55135	0.398366
		0.938489	2.48216	-3.5748	0.60687
		0.82238	2.46068	-3.58739	0.81349
		0.718214	2.4389	-3.58965	1.01672
		0.626079	2.41683	-3.58203	1.21508
		0.546064	2.39446	-3.56484	1.40711
		0.478289	2.37179	-3.53819	1.59138
		0.422917	2.34883	-3.50197	1.76649
		0.380154	2.32556	-3.4559	1.93104
		0.350245	2.30199	-3.39956	2.08364
		0.33346	2.27812	-3.3324	2.22296
		0.330058	2.25395	-3.25375	2.34782
		0.340246	2.22947	-3.16282	2.45723
		0.364164	2.20469	-3.05888	2.55046
		0.401887	2.1796	-2.94135	2.62703
		0.453409	2.1542	-2.80986	2.6867
		0.518549	2.1285	-2.66425	2.72949
		0.596833	2.10248	-2.50455	2.75567
		0.687453	2.07616	-2.33095	2.76572
		0.789331	2.04953	-2.14376	2.76035
		0.901224	2.02259	-1.94354	2.74043
		1.0218	1.99534	-1.73104	2.70706
		1.14964	1.96778	-1.50725	2.66143
		1.28332	1.9399	-1.27338	2.60484
		1.42134	1.91171	-1.03075	2.53862
		1.56227	1.88321	-0.780778	2.46408
		1.70473	1.8544	-0.524924	2.38242
		1.84752	1.82527	-0.264689	2.29467
		1.9896	1.79583	-0.00159087	2.20166
		2.13015	1.76608	0.262854	2.10406
		2.26845	1.73601	0.527139	2.00234
		2.40388	1.70562	0.789768	1.89688
		2.53587	3.94964	1.04925	1.78798
		2.66386	3.95296	1.30407	1.67597
		2.78724	3.95143	1.55271	1.56131
		2.90528	3.94512	1.79365	1.44464
		3.01716	3.93412	2.02532	1.32678
		3.12204	3.91845	2.24614	1.20882
		3.21913	3.89806	2.45452	1.0921
		3.30766	3.87284	2.64892	0.978254
		3.38688	3.84263	2.8279	0.869144
		3.45602	3.80738	2.99016	0.766802
		3.51438	3.76721	3.13459	0.673357
		3.56137	3.72244	3.26024	0.590936
		3.59657	3.67359	3.36631	0.521521
		3.61967	3.6213	3.45218	0.466817
		3.63047	3.56632	3.51743	0.428179
		3.62888	3.50946	3.56186	0.4066
		3.61486	3.45157	3.58549	0.402705
		3.58854	3.39353	3.58854	0.416747
		3.55015	3.33616	3.57139	0.448613
		3.50005	3.28013	3.53451	0.497857
		3.43878	3.22593	3.47844	0.563741
		3.36697	3.17375	3.40382	0.645284
		3.28535	3.1236	3.31132	0.741309
		3.19456	3.07535	3.20167	0.850495
		3.09511	3.02885	3.07565	0.971412
		2.98735	2.98403	2.93405	1.10255
		2.87161	2.94093	2.77771	1.24232
		2.74818	2.89976	2.60743	1.38912
		2.61738	2.86077	2.424	1.54141
		2.47951	2.82429	2.22831	1.69775
		2.33492	2.79072	2.0214	1.8569
		2.184	2.76042	1.80448	2.01786
		2.02731	2.73372	1.57896	2.17981
		1.86552	2.71078	1.34651	2.34213
		1.6994	2.69157	1.10912	2.50435
		1.52979	2.67582	0.869041	2.66611
		1.35756	2.66305	0.628744	2.82716
		1.1836	2.6526	0.390816	2.98739
		1.00882	2.64378	0.157859	3.14672
		0.834041	2.63586	-0.0676091	3.30509
		0.659967	2.62812	-0.283253	3.46238
		0.48722	2.61972	-0.486989	3.6184
		0.316352	2.60963	-0.677046	3.77291
		0.147883	2.59662	-0.851985	3.92563
		-0.017649	2.57935	-1.0107	4.07623
		-0.179647	2.55646	-1.15239	4.22433
		-0.337422	2.52666	-1.27652	4.3695
		-0.490187	2.48888	-1.38278	4.51125
		-0.637072	2.44221	-1.47098	4.64902
		-0.777165	2.386	-1.541	4.78217
		-0.909546	2.31991	-1.59283	4.91
		-1.03334	2.24387	-1.62653	5.03169
		-1.14778	2.1581	-1.64231	5.14633
		-1.25232	2.06303	-1.64057	5.25291
		-1.34663	1.95929	-1.62177	5.3505
		-1.43049	1.84768	-1.58644	5.43818
		-1.50372	1.72905	-1.53507	5.51514
		-1.56612	1.60435	-1.46811	5.58068
		-1.61744	1.47459	-1.38595	5.63416
		-1.65743	1.34091	-1.289	5.67509
		-1.68582	1.2045	-1.17765	5.70307
		-1.70236	1.06645	-1.05236	5.71783
		-1.70689	0.927576	-0.913707	5.71926
		-1.6993	0.788336	-0.76238	5.7074
		-1.67961	0.648822	-0.599244	5.68238
		-1.64791	0.508844	-0.425336	5.64445
		-1.60439	0.36795	-0.241869	5.59396
		-1.54925	0.225395	-0.0502387	5.53138
		-1.48269	0.0801483	0.147985	5.45734
		-1.40491	-0.0689925	0.351082	5.37257
		-1.31609	-0.223201	0.557255	5.2779
		-1.21645	-0.383482	0.764703	5.17423
		-1.10629	-0.550672	0.971713	5.0625
		-0.986046	-0.725475	1.17673	4.9437
		-0.856356	-0.90843	1.37839	4.81877
		-0.718044	-1.09978	1.5755	4.68858
		-0.572123	-1.29937	1.76703	4.5539
		-0.419769	-1.50668	1.95208	4.41528
		-0.262304	-1.72088	2.12988	4.27312
		-0.101182	-1.9409	2.29982	4.12765
		0.0620623	-2.16548	2.46141	3.979
		0.225886	-2.3932	2.61423	3.82723
		0.3888	-2.62249	2.75787	3.67243
		0.549399	-2.85165	2.89185	3.51477
		0.706375	-3.07887	3.01555	3.35459
		0.858503	-3.30226	3.12828	3.19245
		1.00462	-3.51987	3.22934	3.02915
		1.14361	-3.72982	3.31809	2.86577
		1.27435	-3.93045	3.39397	2.70365
		1.3957	-4.12039	3.45658	2.54433
		1.50655	-4.29868	3.50564	2.38954
		1.60586	-4.46471	3.54101	2.24107
		1.6927	-4.61822	3.56266	2.10074
		1.76635	-4.75921	3.57064	1.97031
		1.8263	-4.88788	3.56503	1.85145
		1.87233	-5.00454	3.54597	1.74564
		1.9045	-5.10958	3.51364	1.65414
		1.92313	-5.20339	3.46831	1.57794
		1.92882	-5.28623	3.41035	1.51767
		1.92239	-5.35824	3.34022	1.47358
		1.90482	-5.41945	3.25849	1.44549
		1.87721	-5.46982	3.16587	1.43287
		1.8406	-5.50926	3.06323	1.43493
		1.79591	-5.53765	2.95157	1.45061
		1.74389	-5.5549	2.83198	1.47876
		1.68518	-5.56094	2.70559	1.51816
		1.62033	-5.55572	2.57349	1.56764
		1.54983	-5.5393	2.43666	1.62614
		1.47412	-5.5118	2.29599	1.69276
		1.39357	-5.47338	2.15222	1.76674
		1.30839	-5.42433	2.00594	1.84744
		1.21866	-5.36514	1.8576	1.93436
		1.12431	-5.29646	1.70756	2.02717
		1.02514	-5.2191	1.55616	2.12566
		0.920948	-5.13401	1.4037	2.22978
		0.811531	-5.04231	1.25052	2.33953
		0.696857	-4.94526	1.09698	2.45502
		0.577109	-4.84431	0.943619	2.57643
		0.452721	-4.74104	0.791132	2.70394
		0.324362	-4.63707	0.640396	2.83773
		0.192876	-4.53389	0.492418	2.97782
		0.0592136	-4.43286	0.348297	3.12407
		-0.0756272	-4.33522	0.209209	3.2761
		-0.210641	-4.24214	0.0763735	3.43332
		-0.344825	-4.15473	-0.0489879	3.59486
		-0.477174	-4.07406	-0.165697	3.75963
		-0.606683	-4.00109	-0.272628	3.92633
		-0.732369	-3.93669	-0.368719	4.09349
		-0.853335	-3.8817	-0.453012	4.2596
		-0.968813	-3.83694	-0.524671	4.42308
		-1.07819	-3.80315	-0.582987	4.58242
		-1.18102	-3.78093	-0.627395	4.73623
		-1.27697	-3.77064	-0.657539	4.88323
		-1.36586	-3.77234	-0.673375	5.02227
		-1.44763	-3.78578	-0.675208	5.15232
		-1.52233	-3.81053	-0.663641	5.27246
		-1.5901	-3.84601	-0.63945	5.38189
		-1.65111	-3.89162	-0.603453	5.47994
		-1.70557	-3.9468	-0.556411	5.56605
		-1.75369	-4.01109	-0.498963	5.63984
		-1.79569	-4.08413	-0.431618	5.70108
		-1.83181	-4.16566	-0.354767	5.74965
		-1.86226	-4.25561	-0.268746	5.78562
		-1.88722	-4.35409	-0.17392	5.80911
		-1.90674	-4.46128	-0.070735	5.82039
		-1.92077	-4.57739	0.0402989	5.81981
		-1.92917	-4.70263	0.15864	5.80779
		-1.93168	-4.83715	0.283743	5.78488
		-1.92791	-4.98102	0.415083	5.75164
		-1.9174	-5.13414	0.552159	5.70868
		-1.89956	-5.29624	0.694461	5.65658
		-1.8738	-5.46674	0.841441	5.59592
		-1.83962	-5.64468	0.992529	5.52721
		-1.79676	-5.82877	1.14718	5.45095
		-1.74516	-6.01746	1.30487	5.36765
		-1.68495	-6.20902	1.46511	5.27787
		-1.61632	-6.40171	1.62732	5.18222
		-1.53949	-6.59381	1.79082	5.08136
		-1.45469	-6.78366	1.95479	4.97602
		-1.36221	-6.96976	2.11827	4.86688
		-1.26242	-7.15072	2.2802	4.75461
		-1.15582	-7.32543	2.43946	4.63983
		-1.04308	-7.49305	2.59491	4.52311
		-0.92507	-7.65295	2.74544	4.40492
		-0.802814	-7.8047	2.88996	4.28562
		-0.677495	-7.94801	3.02736	4.16547
		-0.550386	-8.08274	3.15652	4.04459
		-0.422802	-8.20884	3.27632	3.9231
		-0.29604	-8.32634	3.38563	3.80115
		-0.171333	-8.43533	3.48337	3.67905
		-0.0498199	-8.5359	3.56859	3.55731
		0.0674668	-8.62817	3.64052	3.43659
		0.179591	-8.71224	3.69861	3.31777
		0.285708	-8.78821	3.74252	3.20184
		0.385067	-8.85617	3.77213	3.08991
		0.477009	-8.91623	3.7875	2.98312
		0.560976	-8.96852	3.78885	2.88256
		0.636517	-9.01323	3.77662	2.78916
		0.70328	-9.05057	3.75142	2.70374
		0.761008	-9.08083	3.71405	2.62695
		0.809537	-9.10428	3.66542	2.55929
		0.848796	-9.12122	3.60656	2.50099
		0.878805	-9.13189	3.53848	2.45201
		0.89968	-9.13649	3.46207	2.41208
		0.911625	-9.13518	3.37805	2.38074
		0.914924	-9.12811	3.28691	2.35738
		0.909923	-9.11537	3.18903	2.34133
		0.897018	-9.09704	3.08469	2.33187
		0.876605	-9.07312	2.97419	2.3283
		0.849016	-9.04364	2.85795	2.33
		0.814482	-9.00866	2.73651	2.3364
		0.773132	-8.96831	2.61047	2.34695
		0.725032	-8.92277	2.48054	2.36115
		0.670222	-8.87226	2.3474	2.37851
		0.608768	-8.81706	2.21171	2.39859
		0.540781	-8.75753	2.07414	2.42101
		0.466449	-8.69419	1.93532	2.44549
		0.386071	-8.62773	1.7959	2.47184
		0.300066	-8.55897	1.6565	2.50002
		0.208967	-8.48889	1.51771	2.53005
		0.113366	-8.41852	1.38013	2.56202
		0.0138196	-8.34891	1.24443	2.59605
		-0.0892845	-8.28111	1.11135	2.63229
		-0.195807	-8.21609	0.981737	2.67095
		-0.305849	-8.15479	0.856544	2.7123
		-0.419681	-8.09813	0.736808	2.75674
		-0.537646	-8.04707	0.623616	2.80472
		-0.660015	-8.00259	0.518049	2.8567
		-0.78684	-7.96556	0.421112	2.91308
		-0.917868	-7.93673	0.333685	2.97415
		-1.05254	-7.91662	0.256486	3.04005
		-1.19008	-7.90557	0.190085	3.1108
		-1.32951	-7.90371	0.134912	3.18623
		-1.46976	-7.91108	0.0912559	3.266
		-1.60971	-7.92762	0.0592431	3.34958
		-1.74824	-7.95325	0.0387937	3.43633
		-1.88427	-7.98778	0.0295884	3.52551
		-2.0168	-8.03093	0.0310518	3.61631
		-2.14489	-8.08231	0.0423668	3.70785
		-2.26769	-8.14138	0.0625317	3.79922
		-2.38445	-8.20754	0.0904532	3.88947
		-2.49451	-8.28019	0.125045	3.97766
		-2.59732	-8.35868	0.165323	4.06283
		-2.69243	-8.44236	0.210507	4.14401
		-2.77952	-8.5305	0.260087	4.2202
		-2.85838	-8.62242	0.31385	4.2904
		-2.92891	-8.71748	0.371839	4.35362
		-2.99115	-8.81516	0.434281	4.40893
		-3.04525	-8.91498	0.501519	4.4555
		-3.0914	-9.01668	0.573965	4.49267
		-3.12988	-9.12011	0.652049	4.51997
		-3.16095	-9.22536	0.736155	4.53718
		-3.18486	-9.33261	0.826545	4.54429
		-3.20187	-9.4422	0.923277	4.54146
		-3.21223	-9.55459	1.02618	4.52901
		-3.21626	-9.67027	1.13488	4.50741
		-3.21439	-9.78971	1.24892	4.47728
		-3.20707	-9.91326	1.36777	4.43943
		-3.19479	-10.0411	1.49091	4.39487
		-3.17797	-10.1733	1.61781	4.3448
		-3.15704	-10.3095	1.74791	4.29053
		-3.13234	-10.4493	1.88054	4.23343
		-3.10409	-10.5921	2.01495	4.17484
		-3.0724	-10.7369	2.15028	4.11592
		-3.03719	-10.883	2.28559	4.05754
		-2.99815	-11.0293	2.41992	4.00026
		-2.95479	-11.1747	2.55227	3.94433
		-2.9064	-11.3182	2.68171	3.88984
		-2.85217	-11.4589	2.80734	3.83669
		-2.79117	-11.5958	2.92839	3.78471
		-2.72248	-11.7281	3.0441	3.73365
		-2.64527	-11.8549	3.15381	3.68323
		-2.559	-11.9752	3.25688	3.63305
		-2.46346	-12.0883	3.35277	3.58267
		-2.35886	-12.1935	3.44103	3.53156
		-2.24573	-12.2902	3.52132	3.47927
		-2.12491	-12.3782	3.59342	3.42539
		-1.99752	-12.457	3.65724	3.36968
		-1.8649	-12.5266	3.71273	3.31205
		-1.72848	-12.5867	3.75985	3.25266
		-1.58965	-12.6372	3.79845	3.19184
		-1.44969	-12.6782	3.82838	3.13016
		-1.30979	-12.7095	3.84948	3.06841
		-1.17099	-12.7312	3.86165	3.00752
		-1.03425	-12.7433	3.86482	2.9486
		-0.900439	-12.7461	3.85895	2.89279
		-0.770332	-12.7397	3.84401	2.84131
		-0.644604	-12.7246	3.81995	2.79537
		-0.523815	-12.7009	3.78667	2.75614
		-0.408413	-12.669	3.74404	2.72473
		-0.298746	-12.6292	3.69198	2.70211
		-0.195068	-12.5817	3.63047	2.68903
		-0.0975603	-12.5269	3.55969	2.68596
		-0.00633947	-12.465	3.47998	2.69303
		0.0785357	-12.3962	3.39188	2.71009
		0.157051	-12.3207	3.29613	2.73675
		0.229224	-12.2386	3.19368	2.77236
		0.295087	-12.1501	3.08563	2.81599
		0.354661	-12.0553	2.97319	2.86652
		0.407902	-11.9544	2.85765	2.92273
		0.454637	-11.848	2.74022	2.9833
		0.494524	-11.7367	2.62206	3.04694
		0.527069	-11.6214	2.50418	3.1124
		0.551654	-11.5034	2.38743	3.17859
		0.567535	-11.3838	2.27243	3.24458
		0.573874	-11.2641	2.15958	3.30974
		0.569838	-11.1455	2.04908	3.37372
		0.554705	-11.0294	1.94106	3.43653
		0.52793	-10.9171	1.8356	3.49845
		0.489138	-10.81	1.73291	3.56005
		0.438106	-10.7094	1.63326	3.62207
		0.374737	-10.6169	1.53708	3.68537
		0.299047	-10.5337	1.44494	3.75082
		0.211181	-10.4612	1.35755	3.81923
		0.111446	-10.4005	1.27576	3.89131
		0.000329659	-10.3524	1.20053	3.96768
		-0.12152	-10.3176	1.1329	4.04879
		-0.253337	-10.2967	1.07395	4.13495
		-0.394289	-10.2899	1.02473	4.22624
		-0.543454	-10.2972	0.986298	4.32246
		-0.699745	-10.3182	0.959617	4.42308
		-0.86186	-10.3526	0.945545	4.52733
		-1.02833	-10.3995	0.944795	4.63424
		-1.19763	-10.4582	0.9579	4.74276
		-1.36826	-10.5275	0.985177	4.85175
		-1.53887	-10.6064	1.02669	4.9601
		-1.70832	-10.6936	1.08224	5.06674
		-1.87569	-10.7881	1.1514	5.1707
		-2.04024	-10.889	1.23351	5.27109
		-2.20133	-10.9952	1.3277	5.36709
		-2.35833	-11.1061	1.43282	5.45793
		-2.5106	-11.2209	1.54747	5.54287
		-2.65746	-11.3392	1.67007	5.62125
		-2.79829	-11.4608	1.79899	5.69246
		-2.93258	-11.5855	1.93261	5.756
		-3.05992	-11.7135	2.06939	5.81147
		-3.18002	-11.8452	2.20788	5.85858
		-3.29269	-11.9808	2.34677	5.89716
		-3.39782	-12.1207	2.48491	5.92717
		-3.49533	-12.2651	2.62134	5.94869
		-3.58512	-12.4139	2.7553	5.96181
		-3.66707	-12.5669	2.88636	5.96663
		-3.74101	-12.7235	3.01438	5.96327
		-3.80671	-12.8831	3.13949	5.95196
		-3.86391	-13.0447	3.26205	5.93294
		-3.91234	-13.2072	3.38257	5.90644
		-3.95172	-13.3693	3.50165	5.87256
		-3.98185	-13.5296	3.61995	5.83123
		-4.00259	-13.687	3.73801	5.78235
		-4.01397	-13.8403	3.85629	5.72593
		-4.0161	-13.9884	3.97501	5.66219
		-4.0092	-14.1305	4.09415	5.59157
		-3.99357	-14.2658	4.21341	5.51475
		-3.96969	-14.3937	4.3322	5.43254
		-3.93832	-14.5137	4.44971	5.34589
		-3.90041	-14.6254	4.565	5.2558
		-3.85692	-14.7283	4.67715	5.16336
		-3.80876	-14.8224	4.78538	5.06976
		-3.75671	-14.9074	4.88899	4.97622
		-3.70141	-14.9833	4.98741	4.88376
		-3.64338	-15.05	5.08017	4.7931
		-3.58294	-15.1078	5.16684	4.7046
		-3.52021	-15.1567	5.24705	4.61827
		-3.45505	-15.1971	5.32044	4.53386
		-3.38708	-15.2291	5.38663	4.45097
		-3.31566	-15.253	5.44518	4.36911
		-3.24003	-15.2692	5.4957	4.28783
		-3.15931	-15.2778	5.53779	4.20686
		-3.07269	-15.279	5.57114	4.12615
		-2.97943	-15.273	5.59553	4.04589
		-2.879	-15.2599	5.61082	3.96639
		-2.77111	-15.2398	5.61704	3.88814
		-2.65583	-15.2124	5.61432	3.81181
		-2.5336	-15.1777	5.60294	3.73831
		-2.40509	-15.1354	5.58325	3.66873
		-2.27112	-15.0854	5.55567	3.60426
		-2.13259	-15.0276	5.52063	3.54617
		-1.99041	-14.9618	5.47859	3.49572
		-1.84552	-14.888	5.42996	3.45408
		-1.69889	-14.8062	5.37511	3.42234
		-1.55153	-14.7163	5.31434	3.40141
		-1.40446	-14.6184	5.24785	3.39202
		-1.25872	-14.5125	5.1758	3.3947
		-1.11538	-14.3988	5.09828	3.4098
		-0.975555	-14.2776	5.01533	3.43749
		-0.840345	-14.1497	4.92696	3.47773
		-0.71082	-14.0157	4.83316	3.53029
		-0.587939	-13.8767	4.73383	3.59474
		-0.472491	-13.7339	4.62882	3.6704
		-0.365059	-13.5886	4.51792	3.75642
		-0.26601	-13.4422	4.40089	3.85167
		-0.175491	-13.2961	4.27748	3.95484
		-0.093441	-13.1516	4.14742	4.06444
		-0.0196184	-13.0104	4.01051	4.17893
		0.0463488	-12.8737	3.86659	4.29672
		0.104908	-12.7428	3.71558	4.41628
		0.156538	-12.6191	3.55754	4.53612
		0.201706	-12.5036	3.39268	4.65485
		0.240833	-12.3975	3.22149	4.77121
		0.274264	-12.3018	3.04473	4.88418
		0.302243	-12.2174	2.86351	4.99298
		0.32489	-12.1451	2.67926	5.09717
		0.342208	-12.0855	2.49362	5.19663
		0.354083	-12.0389	2.30831	5.29159
		0.360292	-12.0057	2.12497	5.38256
		0.36051	-11.9859	1.94512	5.47024
		0.354333	-11.9797	1.77025	5.55548
		0.341294	-11.9869	1.6018	5.63913
		0.320875	-12.0076	1.4412	5.72209
		0.292494	-12.0416	1.28981	5.80515
		0.255502	-12.0886	1.14881	5.88888
		0.209181	-12.1486	1.01917	5.97358
		0.152796	-12.2211	0.9016	6.05926
		0.0856592	-12.3057	0.796526	6.14571
		0.00717526	-12.402	0.704088	6.23255
		-0.0830868	-12.5091	0.624191	6.31919
		-0.185297	-12.6261	0.556557	6.40493
		-0.299301	-12.752	0.500775	6.489
		-0.424624	-12.8858	0.45634	6.5706
		-0.560496	-13.0264	0.422689	6.64888
		-0.705835	-13.1727	0.399229	6.72298
		-0.859211	-13.3234	0.385352	6.79194
		-1.01887	-13.4777	0.380447	6.85474
		-1.18283	-13.6346	0.383943	6.91036
		-1.34902	-13.7936	0.395342	6.95789
		-1.51534	-13.9541	0.414231	6.99657
		-1.67975	-14.1159	0.440302	7.02589
		-1.84031	-14.2789	0.473369	7.04554
		-1.99524	-14.443	0.513392	7.05545
		-2.14288	-14.6083	0.560472	7.05568
		-2.2818	-14.7744	0.614846	7.04644
		-2.41073	-14.9409	0.676868	7.02804
		-2.52868	-15.1075	0.746981	7.00091
		-2.63496	-15.2732	0.825633	6.96556
		-2.72917	-15.4371	0.913173	6.92259
		-2.81128	-15.5984	1.00976	6.87265
		-2.8815	-15.7559	1.11533	6.81642
		-2.94029	-15.9086	1.22954	6.75461
		-2.98821	-16.0557	1.35178	6.68795
		-3.0259	-16.1965	1.48112	6.61712
		-3.05404	-16.33	1.6164	6.54271
		-3.07329	-16.4555	1.75626	6.46518
		-3.08434	-16.5725	1.89921	6.38484
		-3.08783	-16.6804	2.04375	6.30187
		-3.08434	-16.7788	2.18843	6.21628
		-3.07448	-16.8676	2.33193	6.12798
		-3.05883	-16.9465	2.47308	6.03675
		-3.03799	-17.0158	2.61088	5.94225
		-3.01259	-17.0755	2.74455	5.84411
		-2.98321	-17.1259	2.87346	5.74198
		-2.95041	-17.1672	2.99719	5.63553
		-2.91471	-17.1996	3.1155	5.52446
		-2.87653	-17.2233	3.22833	5.40853
		-2.83617	-17.2384	3.33566	5.28761
		-2.79385	-17.245	3.43747	5.16166
		-2.7497	-17.2431	3.53371	5.03076
		-2.70377	-17.2328	3.62436	4.89511
		-2.65611	-17.2139	3.70943	4.75522
		-2.60675	-17.1865	3.78899	4.612
		-2.55577	-17.1503	3.86312	4.46676
		-2.50324	-17.1055	3.93189	4.32111
		-2.44921	-17.0524	3.99535	4.17689
		-2.39372	-16.9915	4.05346	4.03603
		-2.33673	-16.9235	4.10611	3.90051
		-2.27821	-16.8492	4.15313	3.77223
		-2.21814	-16.7697	4.19431	3.653
		-2.15659	-16.6858	4.22946	3.54442
		-2.09375	-16.5986	4.25843	3.44788
		-2.02985	-16.5087	4.28112	3.36461
		-1.9652	-16.4166	4.29754	3.29558
		-1.9001	-16.3225	4.30774	3.24154
		-1.83487	-16.2265	4.31185	3.20291
		-1.76985	-16.1285	4.31002	3.17982
		-1.70543	-16.0281	4.30244	3.17216
		-1.64202	-15.9251	4.28926	3.17964
		-1.58003	-15.8193	4.27066	3.20185
		-1.51989	-15.7106	4.24681	3.23819
		-1.46195	-15.5989	4.21787	3.28804
		-1.40644	-15.4844	4.18404	3.35076
		-1.35351	-15.3674	4.14546	3.42587
		-1.3032	-15.2484	4.10229	3.51292
		-1.25548	-15.128	4.05464	3.61153
		-1.21029	-15.0071	4.0026	3.72127
		-1.16762	-14.8864	3.94621	3.84164
		-1.1275	-14.7668	3.88543	3.97203
		-1.09004	-14.6492	3.82017	4.11174
		-1.0554	-14.5347	3.7503	4.25994
		-1.02373	-14.4244	3.67565	4.41566
		-0.995132	-14.3194	3.59594	4.57794
		-0.969635	-14.221	3.5108	4.7458
		-0.947191	-14.1306	3.41983	4.91832
		-0.927692	-14.0491	3.32272	5.09465
		-0.910981	-13.9775	3.21929	5.27401
		-0.89689	-13.9167	3.1096	5.45572
		-0.885257	-13.8673	2.99401	5.63911
		-0.875942	-13.8298	2.8732	5.82345
		-0.868823	-13.8044	2.74827	6.00783
		-0.863797	-13.7913	2.62066	6.19112
		-0.860779	-13.7906	2.49217	6.37205
		-0.859703	-13.8022	2.3648	6.54926
		-0.860514	-13.8258	2.24072	6.72144
		-0.863146	-13.8611	2.12207	6.88742
		-0.867537	-13.9075	2.01092	7.0461
		-0.873648	-13.9642	1.90904	7.19654
		-0.881489	-14.0304	1.81782	7.33798
		-0.891131	-14.1049	1.73828	7.46987
		-0.902703	-14.1867	1.67112	7.59186
		-0.916392	-14.2745	1.61678	7.70378
		-0.932445	-14.3674	1.57544	7.80554
		-0.951157	-14.4644	1.54704	7.89718
		-0.972854	-14.5649	1.53125	7.9787
		-0.997848	-14.6685	1.52751	8.05011
		-1.02639	-14.7751	1.53504	8.11134
		-1.05864	-14.8853	1.55292	8.16234
		-1.09468	-14.9994	1.58012	8.20305
		-1.13447	-15.1182	1.61559	8.23344
		-1.17786	-15.2423	1.65835	8.25352
		-1.22457	-15.3723	1.70751	8.26333
		-1.2742	-15.509	1.76235	8.26297
		-1.3262	-15.6523	1.82232	8.25256
		-1.3799	-15.8023	1.88704	8.23225
		-1.43488	-15.9582	1.95629	8.2022
		-1.48756	-16.1191	2.03003	8.16256
		-1.53704	-16.2839	2.10839	8.11354
		-1.58253	-16.4512	2.19164	8.05544
		-1.62334	-16.6195	2.2802	7.9887
		-1.65894	-16.7876	2.37461	7.91386
		-1.68893	-16.9539	2.47544	7.83159
		-1.71301	-17.1171	2.58316	7.74266
		-1.73099	-17.2758	2.69812	7.64787
		-1.74279	-17.4289	2.82048	7.54809
		-1.74844	-17.5748	2.95016	7.44421
		-1.74806	-17.7125	3.08688	7.33714
		-1.74195	-17.8409	3.23016	7.22779
		-1.73054	-17.9591	3.37929	7.11707
		-1.71439	-18.0663	3.53335	7.00584
		-1.69413	-18.1622	3.69127	6.89485
		-1.67045	-18.2463	3.85183	6.78481
		-1.64403	-18.3186	4.0137	6.67627
		-1.61555	-18.3793	4.17549	6.56972
		-1.58566	-18.4285	4.33578	6.46552
		-1.55497	-18.4666	4.49322	6.36388
		-1.524	-18.4941	4.64657	6.26488
		-1.49323	-18.5115	4.79476	6.16845
		-1.46303	-18.5189	4.93684	6.07439
		-1.4337	-18.517	5.07196	5.98242
		-1.40552	-18.5059	5.19939	5.89219
		-1.3787	-18.4862	5.3185	5.80334
		-1.35348	-18.458	5.42874	5.71552
		-1.33006	-18.4218	5.52963	5.62848
		-1.30865	-18.3777	5.6208	5.5421
		-1.28944	-18.3259	5.70192	5.45646
		-1.27257	-18.2664	5.77268	5.37175
		-1.25819	-18.1992	5.83276	5.28827
		-1.24637	-18.1243	5.88184	5.20648
		-1.23714	-18.0413	5.91965	5.12695
		-1.23052	-17.9499	5.94609	5.05032
		-1.22645	-17.8497	5.96123	4.97729
		-1.22487	-17.7406	5.96533	4.90854
		-1.22566	-17.6225	5.95881	4.84475
		-1.22868	-17.4958	5.94217	4.78652
		-1.23377	-17.3611	5.91598	4.7344
		-1.24072	-17.2195	5.88084	4.68881
		-1.24928	-17.0724	5.83735	4.65016
		-1.25915	-16.9214	5.78609	4.61881
		-1.27006	-16.768	5.7276	4.5951
		-1.28168	-16.6139	5.6624	4.57928
		-1.29373	-16.4605	5.59099	4.57148
		-1.30593	-16.3092	5.51389	4.57173
		-1.31805	-16.161	5.4316	4.57995
		-1.32988	-16.0172	5.34466	4.59588
		-1.32774	-15.8786	5.25359	4.61913
		-1.32563	-15.7461	5.15888	4.64913
		-1.32354	-15.6205	5.06101	4.68518
		-1.32146	-15.5025	4.96043	4.72653
		-1.31941	-15.3929	4.85758	4.77247
		-1.31738	-15.292	4.75289	4.82233
		-1.31536	-15.2004	4.64677	4.87556
		-1.31336	-15.1184	4.53957	4.93171
		-1.31139	-15.0461	4.43158	4.99045
		-1.30943	-14.9836	4.32298	5.05157
		-1.30749	-14.9309	4.21384	5.11493
		-1.30557	-14.8876	4.10412	5.18048
		-1.30367	-14.8536	3.99366	5.24822
		-1.30179	-14.8285	3.88224	5.3182
		-1.29992	-14.8118	3.76951	5.39053
		-1.29808	-14.8031	3.65509	5.46528
		-1.29625	-14.802	3.53855	5.5425
		-1.29444	-14.808	3.41955	5.62211
		-1.29265	-14.8207	3.2978	5.70393
		-1.29088	-14.8396	3.17315	5.78773
		-1.28912	-14.8645	3.04558	5.87318
		-1.28738	-14.8948	2.91532	5.95983
		-1.28566	-14.9301	2.78289	6.04713
		-1.28396	-14.9701	2.64917	6.13439
		-1.28227	-15.0142	2.51532	6.22078
		-1.2806	-15.0622	2.38267	6.30533
		-1.27894	-15.1139	2.25263	6.38693
		-1.2773	-15.169	2.12661	6.4644
		-1.27568	-15.2276	2.00598	6.53653
		-1.27407	-15.2899	1.89202	6.60222
		-1.27247	-15.3558	1.78591	6.66047
		-1.27089	-15.4256	1.68872	6.71045
		-1.26933	-15.4994	1.60126	6.75146
		-1.26777	-15.5772	1.52405	6.78296
		-1.26623	-15.6591	1.45733	6.80457
		-1.26471	-15.7453	1.40112	6.81612
		-1.26319	-15.836	1.35531	6.8176
		-1.26169	-15.9314	1.31967	6.80924
		-1.2602	-16.032	1.29384	6.79138
		-1.25872	-16.138	1.27738	6.76446
		-1.25725	-16.2501	1.26974	6.729
		-1.2558	-16.3686	1.27029	6.68561
		-1.25435	-16.4937	1.27833	6.63498
		-1.25291	-16.6248	1.29313	6.57784
		-1.25148	-16.7613	1.31398	6.51497
		-1.25006	-16.9017	1.34022	6.44716
		-1.24865	-17.0447	1.37132	6.37515
		-1.24724	-17.1885	1.40691	6.2997
		-1.24585	-17.3313	1.44679	6.22148
		-1.24446	-17.4716	1.49098	6.14104
		-1.24307	-17.6074	1.53968	6.05884
		-1.24169	-17.7372	1.59331	5.97519
		-1.24032	-17.8596	1.65244	5.89031
		-1.23895	-17.9731	1.71777	5.80439
		-1.23759	-18.0766	1.79001	5.71764
		-1.23623	-18.1694	1.86985	5.63031
		-1.23487	-18.2507	1.95785	5.54275
		-1.23351	-18.3201	2.05443	5.4554
		-1.23216	-18.3774	2.15978	5.36878
		-1.23081	-18.4225	2.27383	5.28348
		-1.22946	-18.4558	2.39622	5.20017
		-1.22812	-18.4775	2.52635	5.11959
		-1.22677	-18.4882	2.66341	5.04247
		-1.22542	-18.4888	2.80637	4.96954
		-1.22408	-18.4801	2.95414	4.90145
		-1.22273	-18.4631	3.10552	4.83877
		-1.22138	-18.4389	3.25924	4.782
		-1.22003	-18.4084	3.41393	4.73153
		-1.21867	-18.3727	3.56817	4.68772
		-1.21732	-18.3323	3.72048	4.65087
		-1.21596	-18.288	3.86946	4.62119
		-1.2146	-18.2401	4.01377	4.59878
		-1.21323	-18.1889	4.15226	4.5836
		-1.21186	-18.1346	4.28392	4.57548
		-1.21048	-18.077	4.40796	4.57409
		-1.2091	-18.0159	4.52378	4.57894
		-1.20771	-17.9509	4.63091	4.58933
		-1.20631	-17.8818	4.7291	4.60437
		-1.20491	-17.808	4.81822	4.62307
		-1.2035	-17.729	4.89836	4.64443
		-1.20208	-17.6443	4.96977	4.66751
		-1.20065	-17.5534	5.03276	4.69145
		-1.19922	-17.4557	5.08763	4.71553
		-1.19777	-17.3507	5.13458	4.73916
		-1.19632	-17.2384	5.17367	4.76194
		-1.19485	-17.1187	5.20496	4.78362
		-1.19338	-16.992	5.22847	4.80415
		-1.19189	-16.8588	5.24431	4.82372
		-1.19039	-16.7201	5.25266	4.8427
		-1.18888	-16.5769	5.25378	4.86161
		-1.18736	-16.4306	5.24799	4.88111
		-1.18582	-16.2826	5.23561	4.90194
		-1.18427	-16.1348	5.21692	4.92484
		-1.18271	-15.9889	5.19211	4.95054
		-1.18113	-15.8465	5.16133	4.97972
		-1.17953	-15.7092	5.12465	5.01294
		-1.17792	-15.5782	5.08219	5.05063
		-1.1763	-15.4546	5.03408	5.09296
		-1.17466	-15.3391	4.98057	5.13988
		-1.173	-15.2324	4.92194	5.1911
		-1.17132	-15.1348	4.85853	5.2461
		-1.16963	-15.0465	4.79071	5.30422
		-1.16791	-14.9674	4.71886	5.36465
		-1.16618	-14.8975	4.64333	5.42655
		-1.16443	-14.8365	4.5644	5.48902
		-1.16266	-14.7843	4.48215	5.55122
		-1.16087	-14.7403	4.39657	5.61232
		-1.15906	-14.7042	4.30749	5.67153
		-1.15723	-14.6753	4.21474	5.72817
		-1.15538	-14.6531	4.11813	5.78163
		-1.1535	-14.6371	4.01754	5.83143
		-1.1516	-14.6264	3.91302	5.87723
		-1.14968	-14.6206	3.80483	5.9188
		-1.14774	-14.6193	3.69347	5.95603
		-1.14577	-14.622	3.57965	5.9889
		-1.14378	-14.6286	3.46421	6.01747
		-1.14177	-14.6389	3.34805	6.04185
		-1.13973	-14.653	3.23204	6.06222
		-1.13767	-14.6708	3.11695	6.07876
		-1.13558	-14.6925	3.00347	6.09168
		-1.13346	-14.7184	2.89224	6.10123
		-1.13132	-14.7487	2.7839	6.10762
		-1.12916	-14.7836	2.67911	6.11109
		-1.12696	-14.8235	2.57855	6.11187
		-1.12474	-14.8688	2.48292	6.11014
		-1.1225	-14.9199	2.39287	6.106
		-1.12022	-14.9774	2.30897	6.09944
		-1.11792	-15.0416	2.23163	6.09038
		-1.11559	-15.1131	2.16118	6.0787
		-1.11323	-15.1923	2.09783	6.06429
		-1.11084	-15.2795	2.04161	6.04704
		-1.10843	-15.3746	1.99233	6.0269
		-1.10598	-15.4774	1.94954	6.00384
		-1.10351	-15.5871	1.91257	5.97785
		-1.10101	-15.7029	1.88071	5.94898
		-1.09847	-15.8235	1.85331	5.91734
		-1.09591	-15.9476	1.82984	5.88314
		-1.09332	-16.0734	1.8099	5.84669
		-1.0907	-16.1994	1.79319	5.80838
		-1.08805	-16.3239	1.77947	5.76867
		-1.08537	-16.4453	1.76851	5.728
		-1.08266	-16.5626	1.76001	5.68678
		-1.07992	-16.6746	1.75368	5.64534
		-1.07716	-16.7805	1.74915	5.60399
		-1.07436	-16.8797	1.74607	5.56303
		-1.07153	-16.9715	1.74414	5.52273
		-1.06867	-17.0555	1.74316	5.48341
		-1.06578	-17.1315	1.74307	5.44537
		-1.06286	-17.1994	1.74392	5.40891
		-1.05992	-17.2591	1.74587	5.37428
		-1.05694	-17.3107	1.74921	5.3417
		-1.05393	-17.3543	1.75423	5.31131
		-1.05089	-17.39	1.76128	5.28322
		-1.04782	-17.418	1.77063	5.25753
		-1.04473	-17.4385	1.78251	5.23434
		-1.0416	-17.4517	1.79704	5.2138
		-1.03844	-17.4578	1.81421	5.19608
		-1.03526	-17.4569	1.83393	5.18139
		-1.03204	-17.4493	1.85594	5.16989
		-1.0288	-17.4349	1.87978	5.16173
		-1.02552	-17.414	1.90488	5.15701
		-1.02222	-17.3865	1.93056	5.15578
		-1.01889	-17.3526	1.95616	5.158
		-1.01553	-17.3124	1.98104	5.16359
		-1.01215	-17.2661	2.00452	5.17235
		-1.00873	-17.2141	2.02581	5.18401
		-1.00529	-17.1566	2.04398	5.19826
		-1.00182	-17.0939	2.058	5.21478
		-0.998323	-17.0262	2.06684	5.23321
		-0.994798	-16.954	2.06965	5.25322
		-0.991246	-16.8775	2.06581	5.27443
		-0.987667	-16.7971	2.05502	5.29491
		-0.984062	-16.7132	2.04769	5.31489
		-0.98043	-16.626	2.03462	5.33401
		-0.976772	-16.5361	2.01685	5.35193
		-0.973088	-16.4438	1.99569	5.36827
		-0.969377	-16.3498	1.97252	5.38265
		-0.965641	-16.2546	1.94874	5.39466
		-0.961879	-16.1593	1.92558	5.40396
		-0.958091	-16.0645	1.90409	5.41031
		-0.954278	-15.9713	1.88506	5.41358
		-0.950439	-15.8806	1.86905	5.41372
		-0.946575	-15.7933	1.85633	5.41079
		-0.942686	-15.7101	1.84698	5.40488
		-0.938773	-15.6317	1.84088	5.39617
		-0.934834	-15.5589	1.83783	5.38491
		-0.930871	-15.492	1.83755	5.37148
		-0.926884	-15.4316	1.83981	5.3563
		-0.922873	-15.3779	1.84438	5.33992
		-0.918837	-15.3313	1.8511	5.32288
		-0.914778	-15.292	1.85981	5.30578
		-0.910695	-15.2602	1.87034	5.28916
		-0.906588	-15.236	1.88251	5.27345
		-0.902458	-15.2194	1.89612	5.25901
		-0.898304	-15.2101	1.91097	5.24601
		-0.894127	-15.2079	1.92689	5.23456
		-0.889926	-15.2123	1.94377	5.22465
		-0.885703	-15.2225	1.96149	5.21624
		-0.881456	-15.2379	1.97999	5.20921
		-0.877186	-15.2575	1.99919	5.20345
		-0.872893	-15.2804	2.01905	5.19879
		-0.868578	-15.3057	2.03951	5.19504
		-0.86424	-15.3323	2.06053	5.19201
		-0.859879	-15.3596	2.08201	5.18949
		-0.855497	-15.3868	2.10385	5.18734
		-0.851092	-15.4135	2.1259	5.18541
		-0.846665	-15.4392	2.14796	5.18363
		-0.842217	-15.4637	2.16981	5.18191
		-0.837747	-15.4868	2.19121	5.18021
		-0.833256	-15.5085	2.21186	5.17848
		-0.828745	-15.5288	2.23152	5.17667
		-0.824213	-15.5478	2.24995	5.17474
		-0.81966	-15.5659	2.26701	5.17264
		-0.815088	-15.5832	2.28256	5.17036
		-0.810496	-15.6001	2.29653	5.16788
		-0.805884	-15.6169	2.30886	5.16518
		-0.801254	-15.6338	2.31952	5.16228
		-0.796605	-15.6512	2.32853	5.1592
		-0.791939	-15.669	2.33596	5.15596
		-0.787254	-15.6873	2.34191	5.15262
		-0.782553	-15.7061	2.3465	5.14923
		-0.777834	-15.7254	2.34991	5.14756
		-0.773099	-15.7449	2.34674	5.14588
		-0.768349	-15.7646	2.3436	5.14419
		-0.763582	-15.7841	2.3405	5.14249
		-0.758801	-15.8033	2.33744	5.14079
		-0.754006	-15.8218	2.33441	5.13907
		-0.749197	-15.8393	2.33141	5.13734
		-0.744374	-15.8558	2.32845	5.13561
		-0.739539	-15.8708	2.32552	5.13387
		-0.734691	-15.8843	2.32262	5.13212
		-0.729831	-15.8958	2.31975	5.13036
		-0.72496	-15.9052	2.31692	5.1286
		-0.720079	-15.9121	2.31412	5.12682
		-0.715187	-15.9162	2.31135	5.12504
		-0.710287	-15.9172	2.30861	5.12325
		-0.705377	-15.9147	2.30589	5.12145
		-0.700458	-15.9087	2.30321	5.11964
		-0.695533	-15.8989	2.30056	5.11783
		-0.690599	-15.8853	2.29793	5.11601
		-0.68566	-15.8681	2.29533	5.11418
		-0.680714	-15.8475	2.29276	5.11234
		-0.675763	-15.8237	2.29021	5.11049
		-0.670807	-15.7969	2.28769	5.10864
		-0.665847	-15.7675	2.2852	5.10678
		-0.660884	-15.7358	2.28273	5.10491
		-0.655917	-15.7024	2.28028	5.10304
		-0.650948	-15.6677	2.27786	5.10115
		-0.645977	-15.6322	2.27546	5.09926
		-0.641004	-15.5964	2.27308	5.09737
		-0.636031	-15.5607	2.27073	5.09546
		-0.631057	-15.5255	2.26839	5.09355
		-0.626083	-15.4911	2.26608	5.09163
		-0.62111	-15.4578	2.26379	5.0897
		-0.616139	-15.426	2.26151	5.08777
		-0.611169	-15.3958	2.25926	5.08583
		-0.606202	-15.3674	2.25703	5.08388
		-0.601238	-15.3408	2.25481	5.08193
		-0.596278	-15.3161	2.25261	5.07997
		-0.591322	-15.293	2.25042	5.078
		-0.58637	-15.2718	2.24826	5.07603
		-0.581424	-15.2524	2.2461	5.07405
		-0.576485	-15.2348	2.24397	5.07206
		-0.571551	-15.2194	2.24185	5.07006
		-0.566625	-15.2062	2.23974	5.06806
		-0.561707	-15.1955	2.23764	5.06606
		-0.556798	-15.1874	2.23556	5.06404
		-0.551898	-15.1822	2.23349	5.06202
		-0.547008	-15.1799	2.23143	5.06
		-0.542128	-15.1805	2.22939	5.05796
		-0.537259	-15.184	2.22735	5.05592
		-0.532402	-15.1902	2.22533	5.05388
		-0.527557	-15.1989	2.22331	5.05183
		-0.522726	-15.2098	2.22131	5.04977
		-0.517907	-15.2225	2.21931	5.04771
		-0.513103	-15.2472	2.21732	5.04564
		-0.508314	-15.2721	2.21534	5.04356
		-0.50354	-15.2968	2.21337	5.04148
		-0.498782	-15.3208	2.21141	5.03939
		-0.49404	-15.3438	2.20945	5.0373
		-0.489315	-15.3658	2.2075	5.0352
		-0.484608	-15.3864	2.20556	5.03309
		-0.47992	-15.4055	2.20363	5.03098
		-0.47525	-15.423	2.2017	5.02887
		-0.470599	-15.4388	2.19978	5.02674
		-0.465968	-15.4527	2.19786	5.02462
		-0.461357	-15.4647	2.19595	5.02248
		-0.456767	-15.4747	2.19405	5.02034
		-0.452198	-15.4828	2.19215	5.0182
		-0.447651	-15.4891	2.19026	5.01605
		-0.443126	-15.494	2.18837	5.01389
		-0.438623	-15.4979	2.18649	5.01173
		-0.434144	-15.5013	2.18462	5.00956
		-0.429688	-15.5047	2.18275	5.00739
		-0.425256	-15.5086	2.18088	5.00521
		-0.420848	-15.5135	2.17903	5.00303
		-0.416464	-15.5195	2.17717	5.00084
		-0.412106	-15.5268	2.17532	4.99865
		-0.407772	-15.5353	2.17348	4.99645
		-0.403464	-15.5448	2.17164	4.99424
		-0.399182	-15.5552	2.16981	4.99204
		-0.394926	-15.566	2.16798	4.98982
		-0.390696	-15.5771	2.16615	4.9876
		-0.386493	-15.588	2.16434	4.98538
		-0.382317	-15.5986	2.16252	4.98315
		-0.378167	-15.6085	2.16072	4.98091
		-0.374046	-15.6175	2.15891	4.97867
		-0.369951	-15.6254	2.15712	4.97643
		-0.365885	-15.6321	2.15533	4.97418
		-0.361847	-15.6373	2.15354	4.97192
		-0.357837	-15.6409	2.15176	4.96966
		-0.353856	-15.6429	2.14999	4.9674
		-0.349903	-15.6433	2.14822	4.96513
		-0.34598	-15.6423	2.14646	4.96285
		-0.342085	-15.6398	2.14471	4.96057
		-0.33822	-15.6362	2.14296	4.95828
		-0.334385	-15.6315	2.14122	4.956
		-0.330579	-15.626	2.13949	4.9537
		-0.326803	-15.62	2.13776	4.9514
		-0.323057	-15.6134	2.13604	4.9491
		-0.319341	-15.6063	2.13433	4.94679
		-0.315656	-15.5989	2.13263	4.94447
		-0.312	-15.591	2.13093	4.94215
		-0.308376	-15.5826	2.12924	4.93983
		-0.304781	-15.5738	2.12757	4.9375
		-0.301218	-15.5695	2.1259	4.93517
		-0.297685	-15.5651	2.12424	4.93283
		-0.294182	-15.5608	2.12259	4.93049
		-0.290711	-15.5564	2.12095	4.92814
		-0.28727	-15.552	2.11932	4.92579
		-0.283859	-15.5476	2.1177	4.92343
		-0.28048	-15.5431	2.11609	4.92107
		-0.277131	-15.5386	2.11449	4.91871
		-0.273813	-15.5341	2.1129	4.91634
		-0.270525	-15.5295	2.11133	4.91396
		-0.267268	-15.525	2.10976	4.91158
		-0.264041	-15.5203	2.10821	4.9092
		-0.260844	-15.5157	2.10667	4.90681
		-0.257677	-15.511	2.10514	4.90441
		-0.254541	-15.5063	2.10363	4.90202
		-0.251434	-15.5015	2.10213	4.89961
		-0.248357	-15.4967	2.10064	4.89721
		-0.245309	-15.4919	2.09916	4.89479
		-0.24229	-15.4871	2.0977	4.89238
		-0.239299	-15.4822	2.09625	4.88996
		-0.236338	-15.4773	2.09482	4.88753
		-0.233404	-15.4723	2.0934	4.8851
		-0.230498	-15.4673	2.09199	4.88267
		-0.227619	-15.4623	2.0906	4.88023
		-0.224767	-15.4572	2.08922	4.87779
		-0.221942	-15.4521	2.08786	4.87534
		-0.219142	-15.4469	2.08651	4.87289
		-0.216369	-15.4417	2.08518	4.87043
		-0.21362	-15.4365	2.08386	4.86797
		-0.210895	-15.4312	2.08256	4.86551
		-0.208195	-15.4259	2.08127	4.86304
		-0.205518	-15.4206	2.08	4.86056
		-0.202864	-15.4152	2.07874	4.85809
		-0.200232	-15.4098	2.0775	4.8556
		-0.197622	-15.4043	2.07627	4.85312
		-0.195032	-15.3988	2.07506	4.85063
		-0.192464	-15.3933	2.07387	4.84813
		-0.189915	-15.3877	2.07269	4.84563
		-0.187385	-15.3821	2.07152	4.84313
		-0.184874	-15.3764	2.07037	4.84062
		-0.182381	-15.3707	2.06923	4.83811
		-0.179905	-15.3649	2.06811	4.83559
		-0.177446	-15.3591	2.06701	4.83307
		-0.175003	-15.3533	2.06592	4.83055
		-0.172575	-15.3474	2.06484	4.82802
		-0.170163	-15.3415	2.06378	4.82549
		-0.167764	-15.3355	2.06273	4.82295
		-0.165379	-15.3295	2.0617	4.82041
		-0.163006	-15.3235	2.06068	4.81786
		-0.160646	-15.3174	2.05968	4.81531
		-0.158297	-15.3112	2.05869	4.81276
		-0.155958	-15.3051	2.05771	4.8102
		-0.15363	-15.2988	2.05675	4.80764
		-0.151311	-15.2926	2.0558	4.80508
		-0.149	-15.2863	2.05487	4.80251
		-0.146697	-15.2799	2.05395	4.79993
		-0.144402	-15.2735	2.05304	4.79735
		-0.142113	-15.2671	2.05214	4.79477
		-0.13983	-15.2606	2.05126	4.79219
		-0.137553	-15.2541	2.05039	4.7896
		-0.135279	-15.2476	2.04954	4.787
		-0.13301	-15.241	2.04869	4.78441
		-0.130744	-15.2343	2.04786	4.7818
		-0.12848	-15.2277	2.04704	4.7792
		-0.126219	-15.2209	2.04623	4.77659
		-0.123958	-15.2142	2.04543	4.77398
		-0.121699	-15.2074	2.04465	4.77136
		-0.119439	-15.2005	2.04387	4.76874
		-0.117179	-15.1936	2.04311	4.76611
		-0.114918	-15.1867	2.04236	4.76348
		-0.112655	-15.1797	2.04161	4.76085
		-0.110389	-15.1727	2.04088	4.75821
		-0.108121	-15.1657	2.04016	4.75557
		-0.105848	-15.1586	2.03944	4.75293
		-0.103572	-15.1515	2.03874	4.75028
		-0.10129	-15.1443	2.03804	4.74763
		-0.0990024	-15.1371	2.03736	4.74497
		-0.0967085	-15.1299	2.03668	4.74231
		-0.0944076	-15.1226	2.03601	4.73965
		-0.0920991	-15.1153	2.03535	4.73698
		-0.0897823	-15.108	2.03469	4.73431
		-0.0874565	-15.1006	2.03404	4.73164
		-0.0851212	-15.0932	2.0334	4.72896
		-0.0827757	-15.0857	2.03277	4.72627
		-0.0804193	-15.0782	2.03214	4.72359
		-0.0780515	-15.0707	2.03151	4.7209
		-0.0756717	-15.0632	2.0309	4.71821
		-0.0732793	-15.0556	2.03029	4.71551
		-0.0708737	-15.048	2.02968	4.71281
		-0.0684543	-15.0403	2.02907	4.7101
		-0.0660207	-15.0327	2.02847	4.70739
		-0.0635721	-15.0249	2.02788	4.70468
		-0.0611083	-15.0172	2.02729	4.70197
		-0.0586286	-15.0094	2.0267	4.69925
		-0.0561325	-15.0016	2.02611	4.69652
		-0.0536195	-14.9938	2.02553	4.6938
		-0.0510892	-14.9859	2.02495	4.69107
		-0.048541	-14.978	2.02437	4.68833
		-0.0459746	-14.9701	2.02379	4.6856
		-0.0433895	-14.9622	2.02321	4.68285
		-0.0407852	-14.9542	2.02263	4.68011
		-0.0381614	-14.9462	2.02205	4.67736
		-0.0355177	-14.9382	2.02148	4.67461
		-0.0328537	-14.9301	2.0209	4.67185
		-0.0301691	-14.922	2.02032	4.66909
		-0.0274636	-14.9139	2.01974	4.66633
		-0.0247368	-14.9058	2.01916	4.66357
		-0.0219885	-14.8976	2.01858	4.6608
		-0.0192184	-14.8894	2.01799	4.65802
		-0.0164262	-14.8812	2.0174	4.65524
		-0.0136117	-14.8729	2.01681	4.65246
		-0.0107747	-14.8647	2.01622	4.64968
		-0.00791504	-14.8564	2.01562	4.64689
		-0.00503245	-14.848	2.01502	4.6441
		-0.00212679	-14.8397	2.01442	4.64131
		0.000802077	-14.8313	2.01381	4.63851
		0.00375429	-14.8229	2.01319	4.63571
		0.00672996	-14.8145	2.01257	4.6329
		0.00972918	-14.806	2.01195	4.63009
		0.012752	-14.7975	2.01131	4.62728
		0.0157986	-14.789	2.01068	4.62446
		0.0188689	-14.7805	2.01003	4.62164
		0.021963	-14.7719	2.00939	4.61882
		0.0250809	-14.7634	2.00873	4.616
		0.0282225	-14.7547	2.00807	4.61317
		0.031388	-14.7461	2.00739	4.61033
		0.0345771	-14.7374	2.00672	4.6075
		0.0377898	-14.7288	2.00603	4.60466
		0.0410261	-14.7201	2.00534	4.60182
		0.0442857	-14.7113	2.00464	4.59897
		0.0475685	-14.7025	2.00393	4.59612
		0.0508743	-14.6938	2.00321	4.59327
		0.0542029	-14.6849	2.00248	4.59041
		0.0575541	-14.6761	2.00174	4.58755
		0.0609274	-14.6672	2.001	4.58469
		0.0643228	-14.6583	2.00025	4.58182
		0.0677398	-14.6494	1.99948	4.57895
		0.0711782	-14.6405	1.99871	4.57608
		0.0746375	-14.6315	1.99793	4.5732
		0.0781175	-14.6225	1.99714	4.57032
		0.0816177	-14.6135	1.99633	4.56744
		0.0851378	-14.6044	1.99552	4.56455
		0.0886773	-14.5953	1.9947	4.56166
		0.0922358	-14.5862	1.99387	4.55877
		0.0958129	-14.5771	1.99303	4.55587
		0.0994082	-14.5679	1.99218	4.55297
		0.103021	-14.5587	1.99132	4.55007
		0.106651	-14.5495	1.99044	4.54716
		0.110298	-14.5402	1.98956	4.54425
		0.113961	-14.5309	1.98867	4.54134
		0.11764	-14.5216	1.98776	4.53842
		0.121335	-14.5123	1.98685	4.5355
		0.125044	-14.5029	1.98593	4.53258
		0.128767	-14.4936	1.98499	4.52966
		0.132504	-14.4841	1.98405	4.52673
		0.136255	-14.4747	1.98309	4.5238
		0.140018	-14.4652	1.98213	4.52086
		0.143793	-14.4557	1.98115	4.51792
		0.14758	-14.4462	1.98017	4.51498
		0.151378	-14.4366	1.97917	4.51204
		0.155187	-14.427	1.97817	4.50909
		0.159006	-14.4174	1.97715	4.50614
		0.162834	-14.4077	1.97613	4.50319
		0.166671	-14.398	1.97509	4.50023
		0.170517	-14.3883	1.97405	4.49727
		0.174371	-14.3786	1.973	4.4943
		0.178231	-14.3688	1.97193	4.49134
		0.182099	-14.359	1.97086	4.48837
		0.185973	-14.3492	1.96978	4.4854
		0.189853	-14.3393	1.96869	4.48242
		0.193739	-14.3294	1.96759	4.47944
		0.197629	-14.3195	1.96647	4.47646
		0.201524	-14.3096	1.96535	4.47347
		0.205423	-14.2996	1.96422	4.47049
		0.209326	-14.2896	1.96308	4.46749
		0.213232	-14.2795	1.96193	4.4645
		0.217141	-14.2694	1.96077	4.4615
		0.221052	-14.2593	1.9596	4.4585
		0.224966	-14.2492	1.95842	4.4555
		0.228882	-14.239	1.95723	4.45249
		0.232799	-14.2288	1.95603	4.44948
		0.236717	-14.2186	1.95482	4.44647
		0.240636	-14.2084	1.95359	4.44345
		0.244555	-14.1981	1.95236	4.44043
		0.248474	-14.1878	1.95112	4.43741
		0.252393	-14.1774	1.94986	4.43439
		0.256312	-14.1671	1.9486	4.43136
		0.260229	-14.1567	1.94732	4.42833
		0.264146	-14.1463	1.94604	4.42529
		0.268061	-14.1358	1.94474	4.42225
		0.271974	-14.1253	1.94343	4.41921
		0.275885	-14.1148	1.94211	4.41617
		0.279794	-14.1043	1.94077	4.41312
		0.2837	-14.0937	1.93943	4.41007
		0.287604	-14.0831	1.93807	4.40702
		0.291505	-14.0725	1.9367	4.40396
		0.295402	-14.0619	1.93531	4.4009
		0.299297	-14.0512	1.93392	4.39784
		0.303188	-14.0405	1.93251	4.39478
		0.307075	-14.0298	1.93108	4.39171
		0.310958	-14.0191	1.92964	4.38864
		0.314838	-14.0083	1.92819	4.38556
		0.318714	-13.9975	1.92673	4.38249
		0.322585	-13.9867	1.92524	4.37941
		0.326452	-13.9759	1.92375	4.37632
		0.330315	-13.9651	1.92224	4.37324
		0.334173	-13.9542	1.92071	4.37015
		0.338026	-13.9433	1.91917	4.36706
		0.341874	-13.9324	1.91761	4.36396
		0.345717	-13.9214	1.91604	4.36086
		0.349554	-13.9105	1.91445	4.35776
		0.353386	-13.8995	1.91285	4.35466
		0.357212	-13.8885	1.91122	4.35155
		0.361032	-13.8775	1.90958	4.34844
		0.364846	-13.8665	1.90793	4.34533
		0.368654	-13.8554	1.90625	4.34221
		0.372455	-13.8443	1.90456	4.33909
		0.37625	-13.8332	1.90284	4.33597
		0.380038	-13.8221	1.90111	4.33284
		0.38382	-13.811	1.89936	4.32972
		0.387595	-13.7999	1.89759	4.32659
		0.391363	-13.7887	1.8958	4.32345
		0.395124	-13.7775	1.89399	4.32032
		0.398878	-13.7663	1.89216	4.31718
		0.402625	-13.7551	1.8903	4.31404
		0.406365	-13.7439	1.88843	4.31089
		0.410098	-13.7327	1.88653	4.30775
		0.413823	-13.7214	1.88461	4.3046
		0.417541	-13.7102	1.88267	4.30144
		0.421252	-13.6989	1.8807	4.29829
		0.424954	-13.6876	1.87871	4.29513
		0.428649	-13.6763	1.87669	4.29197
		0.432336	-13.6649	1.87465	4.2888
		0.436015	-13.6536	1.87258	4.28564
		0.439685	-13.6423	1.87049	4.28247
		0.443347	-13.6309	1.86838	4.2793
		0.447	-13.6195	1.86623	4.27612
		0.450644	-13.6081	1.86406	4.27295
		0.454279	-13.5967	1.86186	4.26977
		0.457904	-13.5853	1.85964	4.26658
		0.461521	-13.5739	1.85738	4.2634
		0.465127	-13.5624	1.8551	4.26021
		0.468723	-13.551	1.85279	4.25702
		0.47231	-13.5395	1.85045	4.25383
		0.475886	-13.528	1.84808	4.25063
		0.479452	-13.5165	1.84568	4.24744
		0.483007	-13.505	1.84325	4.24424
		0.486552	-13.4935	1.84079	4.24103
		0.490085	-13.482	1.8383	4.23783
		0.493608	-13.4704	1.83578	4.23462
		0.497119	-13.4589	1.83323	4.23141
		0.500618	-13.4473	1.83065	4.2282
		0.504106	-13.4358	1.82804	4.22498
		0.507582	-13.4242	1.82539	4.22176
		0.511046	-13.4126	1.82272	4.21854
		0.514498	-13.401	1.82001	4.21532
		0.517937	-13.3894	1.81728	4.2121
		0.521363	-13.3777	1.81451	4.20887
		0.524777	-13.3661	1.81171	4.20564
		0.528177	-13.3544	1.80888	4.20241
		0.531564	-13.3428	1.80602	4.19917
		0.534937	-13.3311	1.80313	4.19593
		0.538296	-13.3194	1.8002	4.19269
		0.541641	-13.3078	1.79725	4.18945
		0.544972	-13.2961	1.79427	4.18621
		0.548288	-13.2843	1.79125	4.18296
		0.551589	-13.2726	1.78821	4.17971
		0.554876	-13.2609	1.78514	4.17646
		0.558147	-13.2492	1.78204	4.17321
		0.561403	-13.2374	1.77891	4.16995
		0.564643	-13.2256	1.77575	4.1667
		0.567868	-13.2139	1.77256	4.16344
		0.571078	-13.2021	1.76934	4.16017
		0.574271	-13.1903	1.7661	4.15691
		0.577449	-13.1785	1.76283	4.15364
		0.58061	-13.1667	1.75953	4.15037
		0.583755	-13.1549	1.7562	4.1471
		0.586884	-13.1431	1.75285	4.14383
		0.589997	-13.1312	1.74948	4.14055
		0.593093	-13.1194	1.74608	4.13728
		0.596173	-13.1075	1.74265	4.134
		0.599236	-13.0956	1.7392	4.13071
		0.602281	-13.0837	1.73573	4.12743
		0.60531	-13.0719	1.73223	4.12414
		0.608321	-13.06	1.72871	4.12085
		0.611315	-13.048	1.72517	4.11756
		0.614291	-13.0361	1.72161	4.11427
		0.617249	-13.0242	1.71803	4.11098
		0.62019	-13.0122	1.71443	4.10768
		0.623112	-13.0003	1.71081	4.10438
		0.626016	-12.9883	1.70717	4.10108
		0.628902	-12.9763	1.70351	4.09777
		0.631769	-12.9644	1.69983	4.09447
		0.634617	-12.9524	1.69614	4.09116
		0.637447	-12.9403	1.69243	4.08785
		0.640257	-12.9283	1.68871	4.08454
		0.643049	-12.9163	1.68497	4.08122
		0.645821	-12.9043	1.68122	4.07791
		0.648573	-12.8922	1.67746	4.07459
		0.651307	-12.8801	1.67368	4.07127
		0.654021	-12.8681	1.66989	4.06795
		0.656715	-12.856	1.6661	4.06462
		0.659389	-12.8439	1.66229	4.0613
		0.662044	-12.8318	1.65847	4.05797
		0.664678	-12.8196	1.65464	4.05464
		0.667293	-12.8075	1.6508	4.05131
		0.669888	-12.7954	1.64696	4.04797
		0.672462	-12.7832	1.64311	4.04464
		0.675017	-12.771	1.63926	4.0413
		0.677551	-12.7589	1.6354	4.03796
		0.680065	-12.7467	1.63154	4.03462
		0.682558	-12.7345	1.62767	4.03127
		0.685032	-12.7222	1.6238	4.02793
		0.687484	-12.71	1.61993	4.02458
		0.689917	-12.6978	1.61606	4.02123
		0.692329	-12.6855	1.61218	4.01788
		0.69472	-12.6733	1.60831	4.01453
		0.697091	-12.661	1.60444	4.01117
		0.699442	-12.6487	1.60057	4.00782
		0.701771	-12.6364	1.5967	4.00446
		0.704081	-12.6241	1.59284	4.0011
		0.70637	-12.6117	1.58898	3.99774
		0.708639	-12.5994	1.58512	3.99437
		0.710887	-12.587	1.58127	3.99101
		0.713116	-12.5747	1.57743	3.98764
		0.715324	-12.5623	1.57359	3.98427
		0.717512	-12.5499	1.56976	3.9809
		0.71968	-12.5375	1.56594	3.97753
		0.721828	-12.5251	1.56213	3.97416
		0.723956	-12.5126	1.55833	3.97078
		0.726065	-12.5002	1.55454	3.96741
		0.728154	-12.4877	1.55076	3.96403
		0.730223	-12.4752	1.547	3.96065
		0.732272	-12.4627	1.54324	3.95727
		0.734302	-12.4502	1.53951	3.95388
		0.736312	-12.4377	1.53578	3.9505
		0.738303	-12.4252	1.53208	3.94711
		0.740275	-12.4126	1.52839	3.94373
		0.742227	-12.4001	1.52471	3.94034
		0.744159	-12.3875	1.52106	3.93695
		0.746072	-12.3749	1.51742	3.93356
		0.747966	-12.3623	1.5138	3.93016
		0.749841	-12.3497	1.51021	3.92677
		0.751696	-12.337	1.50663	3.92337
		0.753532	-12.3244	1.50307	3.91997
		0.755349	-12.3117	1.49954	3.91657
		0.757146	-12.2991	1.49603	3.91317
		0.758925	-12.2864	1.49255	3.90977
		0.760684	-12.2737	1.48908	3.90637
		0.762424	-12.2609	1.48565	3.90297
		0.764145	-12.2482	1.48224	3.89956
		0.765848	-12.2354	1.47885	3.89615
		0.767531	-12.2227	1.47549	3.89275
		0.769196	-12.2099	1.47216	3.88934
		0.770842	-12.1971	1.46886	3.88593
		0.77247	-12.1843	1.46559	3.88252
		0.774079	-12.1715	1.46235	3.8791
		0.77567	-12.1587	1.45914	3.87569
		0.777242	-12.1458	1.45596	3.87227
		0.778797	-12.133	1.45281	3.86886
		0.780333	-12.1201	1.4497	3.86544
		0.781852	-12.1072	1.44662	3.86202
		0.783353	-12.0943	1.44357	3.8586
		0.784836	-12.0814	1.44055	3.85518
		0.786302	-12.0685	1.43757	3.85176
		0.78775	-12.0555	1.43463	3.84834
		0.789181	-12.0426	1.43172	3.84491
		0.790595	-12.0296	1.42884	3.84149
		0.791992	-12.0166	1.426	3.83806
		0.793373	-12.0037	1.4232	3.83464
		0.794737	-11.9907	1.42043	3.83121
		0.796084	-11.9777	1.41771	3.82778
		0.797416	-11.9647	1.41502	3.82435
		0.798731	-11.9516	1.41236	3.82092
		0.800031	-11.9386	1.40975	3.81749
		0.801315	-11.9256	1.40717	3.81406
		0.802584	-11.9125	1.40463	3.81063
		0.803838	-11.8994	1.40213	3.80719
		0.805077	-11.8864	1.39967	3.80376
		0.806301	-11.8733	1.39726	3.80032
		0.807512	-11.8602	1.39488	3.79689
		0.808708	-11.8471	1.39254	3.79345
		0.80989	-11.834	1.39024	3.79002
		0.811059	-11.8209	1.38798	3.78658
		0.812214	-11.8078	1.38576	3.78314
		0.813356	-11.7947	1.38358	3.7797
		0.814485	-11.7816	1.38145	3.77626
		0.815602	-11.7685	1.37935	3.77282
		0.816706	-11.7554	1.3773	3.76938
		0.817797	-11.7422	1.37529	3.76593
		0.818876	-11.7291	1.37332	3.76249
		0.819943	-11.716	1.37139	3.75905
		0.820998	-11.7028	1.3695	3.7556
		0.822041	-11.6897	1.36765	3.75216
		0.823073	-11.6766	1.36585	3.74871
		0.824092	-11.6634	1.36408	3.74526
		0.825101	-11.6503	1.36236	3.74182
		0.826098	-11.6371	1.36068	3.73837
		0.827084	-11.624	1.35904	3.73492
		0.82806	-11.6108	1.35744	3.73147
		0.829024	-11.5977	1.35588	3.72802
		0.829977	-11.5845	1.35436	3.72457
		0.83092	-11.5714	1.35288	3.72112
		0.831852	-11.5582	1.35145	3.71767
		0.832773	-11.5451	1.35005	3.71422
		0.833683	-11.5319	1.3487	3.71077
		0.834584	-11.5188	1.34738	3.70732
		0.835473	-11.5057	1.34611	3.70386
		0.836352	-11.4925	1.34488	3.70041
		0.837221	-11.4794	1.34369	3.69695
		0.83808	-11.4662	1.34253	3.6935
		0.838928	-11.4531	1.34142	3.69004
		0.839765	-11.44	1.34034	3.68659
		0.840593	-11.4268	1.33931	3.68313
		0.84141	-11.4137	1.33831	3.67967
		0.842216	-11.4006	1.33736	3.67622
		0.843012	-11.3874	1.33644	3.67276
		0.843798	-11.3743	1.33556	3.6693
		0.844573	-11.3612	1.33471	3.66584
		0.845337	-11.348	1.33391	3.66238
		0.846091	-11.3349	1.33314	3.65892
		0.846835	-11.3218	1.3324	3.65546
		0.847568	-11.3087	1.3317	3.652
		0.84829	-11.2956	1.33104	3.64854
		0.849002	-11.2824	1.33042	3.64508
		0.849703	-11.2693	1.32982	3.64162
		0.850394	-11.2562	1.32927	3.63815
		0.851075	-11.2431	1.32874	3.63469
		0.851745	-11.23	1.32825	3.63123
		0.852404	-11.2168	1.32779	3.62776
		0.853054	-11.2037	1.32736	3.6243
		0.853693	-11.1906	1.32696	3.62083
		0.854322	-11.1775	1.3266	3.61737
		0.854941	-11.1644	1.32626	3.6139
		0.855549	-11.1512	1.32596	3.61044
		0.856148	-11.1381	1.32568	3.60697
		0.856737	-11.125	1.32543	3.6035
		0.857315	-11.1119	1.3252	3.60004
		0.857884	-11.0988	1.32501	3.59657
		0.858443	-11.0856	1.32483	3.5931
		0.858992	-11.0725	1.32469	3.58963
		0.859532	-11.0594	1.32456	3.58616
		0.860061	-11.0462	1.32446	3.58269
		0.860582	-11.0331	1.32439	3.57922
		0.861092	-11.02	1.32433	3.57575
		0.861594	-11.0068	1.32429	3.57228
		0.862086	-10.9937	1.32428	3.56881
		0.862569	-10.9805	1.32428	3.56534
		0.863043	-10.9674	1.3243	3.56187
		0.863508	-10.9542	1.32434	3.5584
		0.863964	-10.9411	1.3244	3.55493
		0.864412	-10.9279	1.32447	3.55145
		0.864851	-10.9147	1.32456	3.54798
		0.865282	-10.9016	1.32466	3.54451
		0.865705	-10.8884	1.32478	3.54103
		0.866121	-10.8752	1.3249	3.53756
		0.866528	-10.862	1.32505	3.53408
		0.866928	-10.8488	1.3252	3.53061
		0.867321	-10.8356	1.32536	3.52713
		0.867708	-10.8224	1.32554	3.52366
		0.868087	-10.8092	1.32572	3.52018
		0.86846	-10.796	1.32591	3.51671
		0.868827	-10.7828	1.32611	3.51323
		0.869187	-10.7696	1.32632	3.50975
		0.869543	-10.7564	1.32654	3.50628
		0.869893	-10.7431	1.32676	3.5028
		0.870238	-10.7299	1.32699	3.49932
		0.870578	-10.7166	1.32723	3.49584
		0.870915	-10.7034	1.32746	3.49236
		0.871247	-10.6901	1.32771	3.48889
		0.871576	-10.6769	1.32795	3.48541
		0.871903	-10.6636	1.3282	3.48193
		0.872226	-10.6503	1.32845	3.47845
		0.872548	-10.6371	1.32871	3.47497
		0.872868	-10.6238	1.32896	3.47149
		0.873186	-10.6105	1.32921	3.46801
		0.873505	-10.5972	1.32947	3.46453
		0.873823	-10.5839	1.32972	3.46105
		0.874142	-10.5706	1.32997	3.45757
		0.874462	-10.5572	1.33023	3.45409
		0.874783	-10.5439	1.33048	3.45061
		0.875107	-10.5306	1.33072	3.44713
		0.875433	-10.5172	1.33097	3.44365
		0.875763	-10.5039	1.33121	3.44017
		0.876097	-10.4905	1.33145	3.43669
		0.876435	-10.4772	1.33169	3.43321
		0.876779	-10.4638	1.33192	3.42973
		0.877128	-10.4504	1.33214	3.42625
		0.877484	-10.437	1.33236	3.42277
		0.877847	-10.4236	1.33258	3.41929
		0.878217	-10.4102	1.33279	3.41581
		0.878596	-10.3968	1.33299	3.41233
		0.878984	-10.3834	1.33319	3.40885
		0.879381	-10.37	1.33339	3.40537
		0.879788	-10.3565	1.33357	3.40189
		0.880207	-10.3431	1.33375	3.39841
		0.880636	-10.3296	1.33392	3.39493
		0.881078	-10.3162	1.33409	3.39145
		0.881533	-10.3027	1.33425	3.38797
		0.882001	-10.2892	1.3344	3.38449
		0.882484	-10.2757	1.33454	3.38101
		0.882981	-10.2622	1.33468	3.37753
		0.883494	-10.2487	1.3348	3.37406
		0.884023	-10.2352	1.33492	3.37058
		0.884569	-10.2217	1.33503	3.3671
		0.885133	-10.2082	1.33514	3.36362
		0.885715	-10.1947	1.33523	3.36014
		0.886316	-10.1811	1.33531	3.35666
		0.886936	-10.1676	1.33539	3.35319
		0.887577	-10.154	1.33546	3.34971
		0.888238	-10.1404	1.33552	3.34623
		0.888921	-10.1269	1.33557	3.34276
		0.889626	-10.1133	1.33561	3.33928
		0.890353	-10.0997	1.33565	3.3358
		0.891104	-10.0861	1.33567	3.33233
		0.891879	-10.0725	1.33569	3.32885
		0.892678	-10.0589	1.33569	3.32538
		0.893502	-10.0453	1.33569	3.3219
		0.894351	-10.0316	1.33568	3.31843
		0.895227	-10.018	1.33566	3.31496
		0.896128	-10.0043	1.33563	3.31148
		0.897058	-9.99067	1.3356	3.30801
		0.898014	-9.977	1.33555	3.30454
		0.898999	-9.96332	1.3355	3.30107
		0.900012	-9.94964	1.33544	3.2976
		0.901055	-9.93594	1.33536	3.29413
		0.902127	-9.92224	1.33529	3.29065
		0.903228	-9.90852	1.3352	3.28719
		0.904361	-9.8948	1.3351	3.28372
		0.905524	-9.88107	1.335	3.28025
		0.906718	-9.86733	1.33489	3.27678
		0.907944	-9.85358	1.33477	3.27331
		0.909202	-9.83982	1.33464	3.26985
		0.910492	-9.82605	1.33451	3.26638
		0.911815	-9.81227	1.33436	3.26292
		0.913171	-9.79848	1.33421	3.25945
		0.91456	-9.78468	1.33406	3.25599
		0.915982	-9.77087	1.33389	3.25252
		0.917438	-9.75705	1.33372	3.24906
		0.918928	-9.74322	1.33354	3.2456
[truncated: 1,753 more rows]

## Sheet: Fig2B
		TN				NT
		pre	MIRS	post		pre	MIRS	post
		3.99602	7.67209	3.87622		-0.639358	-0.960536	-0.601482
		3.21099	4.45103	4.26778		-0.881551	-1.85468	-0.934185
		5.13593	8.75593	2.85714		-1.02191	-1.35209	-1.05123
		5.21254	6.13265	5.57354		-0.539022	-1.79043	-0.873982
		5.90419	10.0612	5.14537		-0.753051	-1.09013	-0.794004
		5.73412	7.71622	5.44266		-0.544877	-1.41213	-1.29238
		6.08445	8.2632	7.82174		-1.34558	-1.7933	-1.14788
		3.68044	4.0136	3.69044		-0.659968	-1.12401	-0.633057
		4.66337	5.80361	2.12016		-1.30123	-1.48026	-1.3566
		5.21796	8.74831	2.95995		-1.17242	-1.53951	-1.32205
		4.3084	5.88385	5.60133		-1.13637	-0.983032	-1.13637
		3.05277	4.89596	5.05131		-1.18169	-1.04055	-0.877677
		4.04404	4.35486	4.20128		-1.23878	-1.89378	-1.39506
		4.86903	5.70353	4.38236		-0.547904	-1.40738	-0.50123
		4.18413	6.14682	3.59109		-1.24172	-1.27901	-0.652849
		7.22497	8.19261	4.17274		-1.09548	-2.12299	-1.48281
		4.75797	4.76309	5.2605		-0.800465	-1.55518	-1.56233
		4.7472	6.36581	5.00598		-1.17006	-1.25652	-1.17031
		5.17584	5.44604	5.65986		-1.32042	-1.68138	-1.40391
		4.37285	5.37956	4.0501		-1.27534	-2.06975	-1.02767

## Sheet: Fig2C
	8 deg/s NT			2 deg/s NT			0 deg/s			2 deg/s TN			8 deg/s TN
	Before	MIRS		Before	MIRS		Before	MIRS		Before	MIRS		Before	MIRS
	-0.639358	-0.960536		0.0362826	0.069105		-0.10526	-0.145389		1.80835	1.82234		3.99602	7.67209
	-0.881551	-1.85468		-0.0247914	-0.207099		0.0988376	0.0941568		1.85626	1.77513		3.21099	4.45103
	-1.02191	-1.35209		-0.716373	-0.954846		0.0790701	0.208394		1.87689	2.07676		5.13593	8.75593
	-0.539022	-1.79043		-0.183799	-0.264873		0.0898523	0.178413		1.98701	1.91921		5.21254	6.13265
	-0.753051	-1.09013		-0.735417	-0.683912		-0.30233	-0.490445		2.18624	2.66628		5.90419	10.0612
	-0.544877	-1.41213		-0.673821	-0.649711		0.165934	0.368699		2.29202	1.51478		5.73412	7.71622
	-1.34558	-1.7933		-0.741124	-0.53174		-0.113164	-0.0368687		1.87164	4.1179		6.08445	8.2632
	-0.659968	-1.12401		-0.172762	-0.525463		-0.296419	0.587947		2.01135	1.69052		3.68044	4.0136
	-1.30123	-1.48026		-0.654941	-0.750895		-0.0103416	-0.0260029		1.85261	1.80446		4.66337	5.80361
	-1.17242	-1.53951		-0.716006	-0.898944		0.318575	0.26537		1.98755	2.06665		5.21796	8.74831
	-1.13637	-0.983032		-0.43446	-0.44733		0.225199	0.142022		1.94902	1.8154		4.3084	5.88385
	-1.18169	-1.04055		-0.45536	-0.501943					1.97703	1.78432		3.05277	4.89596
	-1.23878	-1.89378		-0.197121	-0.715674					1.78267	1.6456		4.04404	4.35486
	-0.547904	-1.40738		-0.209496	-0.649997					2.34646	2.4889		4.86903	5.70353
	-1.24172	-1.27901		-0.646744	-1.26326					2.03183	2.42869		4.18413	6.14682
	-1.09548	-2.12299		-0.755856	-0.570215					1.92091	1.66086		7.22497	8.19261
	-0.800465	-1.55518		-0.388693	-0.038475								4.75797	4.76309
	-1.17006	-1.25652											4.7472	6.36581
	-1.32042	-1.68138											5.17584	5.44604
	-1.27534	-2.06975											4.37285	5.37956

## Sheet: Fig2D
Normalized velocity
	8 deg/s NT			2 deg/s NT			0 deg/s			2 deg/s TN			8 deg/s TN
	Before	MIRS		Before	MIRS		Before	MIRS		Before	MIRS		Before	MIRS
	-0.314243	-0.472102		0.0122806	0.0233901		-0.0626545	-0.0865408		0.0506612	0.0510531		0.632043	1.21348
	-0.115854	-0.243744		-0.00839119	-0.0700973		0.00859084	0.00818399		0.0520033	0.0497305		0.548514	0.760342
	-0.397585	-0.526048		-0.223349	-0.297699		0.00859084	0.0226417		0.0525812	0.0581807		0.368756	0.628669
	-0.474905	-1.57746		-0.0622108	-0.089652		0.00859084	0.0170582		0.364425	0.351991		0.369111	0.434267
	-0.190682	-0.276034		-0.229286	-0.213228		-0.0733459	-0.118983		0.204492	0.249392		0.49065	0.836108
	-0.666642	-1.7277		-0.0699089	-0.0674075		0.0153906	0.0341975		0.214386	0.141686		0.285739	0.384509
	-0.139591	-0.186039		-0.24128	-0.173113		-0.0237581	-0.00774032		0.175065	0.385171		0.345932	0.469805
	-0.0244346	-0.0416155		-0.0235786	-0.0717155		-0.0496704	0.0985211		0.128396	0.107915		0.368467	0.401822
	-0.315541	-0.358954		-0.143315	-0.164312		-0.0116408	-0.0292696		0.111246	0.108354		0.170022	0.211594
	-0.049667	-0.0652181		-0.146094	-0.183421		0.187571	0.156245		0.0153533	0.0159643		0.450612	0.755485
	-0.0960892	-0.0831234		-0.0222714	-0.0229312		0.173558	0.109454		0.559372	0.521022		0.15272	0.208565
	-0.279399	-0.246028		-0.0234421	-0.0258402					0.621436	0.560862		0.266965	0.428153
	-0.0364893	-0.0557828		-0.0128882	-0.0467922					0.313392	0.289295		0.0881869	0.0949647
	-0.051127	-0.131327		-0.0469736	-0.145743					0.216933	0.230102		0.18837	0.220654
	-0.0806236	-0.0830448		-0.0856209	-0.167241					0.258209	0.308643		0.113268	0.166401
	-0.0394687	-0.0764887		-0.256928	-0.193825					0.377847	0.326696		0.202203	0.229284
	-0.0746173	-0.14497		-0.156118	-0.0154535								0.208975	0.2092
	-0.0548264	-0.0588777											0.253456	0.339874
	-0.357827	-0.455646											0.275371	0.289746
	-0.331615	-0.538179											0.174037	0.214103

## Sheet: Fig2E
	TN		NT
	Before-EOG (deg)	MIRS-EOG(deg)	Before-EOG (deg)	MIRS-EOG(deg)
	4.647	-0.210725	0.311675	3.37444
	4.64707	-0.202019	0.311108	3.37545
	4.64711	-0.193314	0.310543	3.37645
	4.64714	-0.184611	0.309979	3.37744
	4.64715	-0.175909	0.309415	3.37844
	4.64714	-0.167208	0.308853	3.37943
	4.64711	-0.158508	0.30829	3.38041
	4.64707	-0.149809	0.307727	3.3814
	4.64701	-0.141112	0.307164	3.38238
	4.64693	-0.132417	0.3066	3.38335
	4.64683	-0.123723	0.306035	3.38433
	4.64672	-0.115031	0.305468	3.3853
	4.64659	-0.106341	0.3049	3.38626
	4.64644	-0.0976525	0.304329	3.38722
	4.64628	-0.0889658	0.303756	3.38818
	4.64611	-0.0802809	0.303179	3.38913
	4.64592	-0.0715977	0.302599	3.39008
	4.64572	-0.0629164	0.302015	3.39103
	4.6455	-0.0542367	0.301427	3.39197
	4.64527	-0.0455588	0.300835	3.3929
	4.64502	-0.0368827	0.300237	3.39383
	4.64477	-0.0282083	0.299634	3.39476
	4.6445	-0.0195355	0.299024	3.39568
	4.64422	-0.0108645	0.298409	3.39659
	4.64392	-0.00219517	0.297786	3.3975
	4.64362	0.00647249	0.297156	3.39841
	4.64331	0.0151385	0.296518	3.39931
	4.64298	0.0238027	0.295872	3.40021
	4.64265	0.0324652	0.295217	3.4011
	4.6423	0.0411258	0.294553	3.40198
	4.64195	0.0497848	0.293879	3.40286
	4.64159	0.058442	0.293195	3.40374
	4.64122	0.0670977	0.292501	3.40461
	4.64085	0.075752	0.291796	3.40547
	4.64046	0.0844048	0.291079	3.40634
	4.64007	0.0930563	0.29035	3.40719
	4.63967	0.101706	0.289609	3.40804
	4.63927	0.110355	0.288855	3.40889
	4.63886	0.119003	0.288089	3.40973
	4.63845	0.127649	0.287308	3.41057
	4.63803	0.136294	0.286514	3.4114
	4.63761	0.144937	0.285705	3.41223
	4.63719	0.15358	0.284882	3.41305
	4.63676	0.16222	0.284043	3.41386
	4.63633	0.170859	0.283189	3.41468
	4.6359	0.179497	0.282319	3.41548
	4.63547	0.188132	0.281432	3.41628
	4.63503	0.196765	0.280529	3.41707
	4.6346	0.205397	0.279609	3.41786
	4.63416	0.214025	0.278671	3.41865
	4.63372	0.222652	0.277715	3.41942
	4.63329	0.231276	0.276742	3.4202
	4.63286	0.239897	0.275749	3.42096
	4.63243	0.248515	0.274738	3.42172
	4.632	0.257131	0.273707	3.42248
	4.63157	0.265743	0.272657	3.42323
	4.63115	0.274352	0.271587	3.42397
	4.63073	0.282958	0.270497	3.42471
	4.63032	0.29156	0.269386	3.42544
	4.62991	0.300159	0.268254	3.42617
	4.62951	0.308753	0.267101	3.42689
	4.62911	0.317343	0.265927	3.4276
	4.62872	0.325928	0.264732	3.42831
	4.62834	0.334509	0.263514	3.42901
	4.62796	0.343084	0.262274	3.4297
	4.62759	0.351653	0.261012	3.43038
	4.62723	0.360216	0.259728	3.43106
	4.62687	0.368772	0.258421	3.43172
	4.62653	0.37732	0.25709	3.43238
	4.6262	0.385861	0.255737	3.43304
	4.62587	0.394393	0.254361	3.43368
	4.62556	0.402916	0.252961	3.43431
	4.62526	0.411429	0.251538	3.43494
	4.62496	0.419933	0.250091	3.43555
	4.62468	0.428427	0.248621	3.43616
	4.62442	0.436909	0.247127	3.43675
	4.62416	0.445381	0.245609	3.43734
	4.62392	0.45384	0.244067	3.43791
	4.62368	0.462288	0.242501	3.43847
	4.62347	0.470722	0.240912	3.43902
	4.62326	0.479144	0.239298	3.43956
	4.62307	0.487551	0.237661	3.44009
	4.62289	0.495945	0.236	3.44061
	4.62273	0.504323	0.234316	3.44111
	4.62258	0.512686	0.232608	3.4416
	4.62245	0.521033	0.230877	3.44208
	4.62233	0.529363	0.229122	3.44254
	4.62223	0.537676	0.227344	3.44299
	4.62214	0.545971	0.225543	3.44343
	4.62207	0.554248	0.22372	3.44385
	4.62201	0.562506	0.221874	3.44426
	4.62197	0.570744	0.220006	3.44466
	4.62195	0.578963	0.218115	3.44504
	4.62194	0.587162	0.216203	3.4454
	4.62196	0.595339	0.21427	3.44575
	4.62198	0.603496	0.212315	3.44609
	4.62203	0.611631	0.210339	3.44641
	4.62209	0.619743	0.208343	3.44672
	4.62217	0.627833	0.206327	3.44701
	4.62227	0.635899	0.20429	3.44729
	4.62238	0.643942	0.202234	3.44755
	4.62252	0.651961	0.200159	3.44779
	4.62267	0.659956	0.198065	3.44802
	4.62284	0.667925	0.195953	3.44824
	4.62303	0.675869	0.193823	3.44844
	4.62324	0.683787	0.191674	3.44863
	4.62347	0.691678	0.189509	3.4488
	4.62372	0.699544	0.187326	3.44896
	4.62399	0.707383	0.185127	3.44911
	4.62428	0.715195	0.182912	3.44924
	4.62459	0.722979	0.18068	3.44936
	4.62492	0.730737	0.178434	3.44946
	4.62526	0.738467	0.176172	3.44956
	4.62563	0.746169	0.173895	3.44964
	4.62603	0.753843	0.171605	3.4497
	4.62644	0.76149	0.1693	3.44976
	4.62687	0.769108	0.166981	3.4498
	4.62732	0.776697	0.16465	3.44983
	4.6278	0.784259	0.162306	3.44984
	4.62829	0.791791	0.159949	3.44985
	4.62881	0.799295	0.15758	3.44984
	4.62935	0.806769	0.1552	3.44982
	4.62991	0.814215	0.152808	3.4498
	4.63049	0.821631	0.150406	3.44975
	4.63109	0.829017	0.147993	3.4497
	4.63172	0.836375	0.145571	3.44964
	4.63236	0.843703	0.143139	3.44957
	4.63303	0.851002	0.140698	3.44949
	4.63372	0.858271	0.138248	3.4494
	4.63443	0.865512	0.13579	3.44929
	4.63516	0.872723	0.133325	3.44918
	4.63591	0.879905	0.130852	3.44907
	4.63668	0.887058	0.128372	3.44894
	4.63748	0.894182	0.125886	3.4488
	4.63829	0.901277	0.123394	3.44866
	4.63913	0.908343	0.120897	3.44851
	4.63998	0.91538	0.118394	3.44835
	4.64086	0.922388	0.115888	3.44818
	4.64176	0.929368	0.113378	3.44801
	4.64267	0.936318	0.110864	3.44783
	4.64361	0.94324	0.108347	3.44764
	4.64457	0.950132	0.105829	3.44744
	4.64555	0.956994	0.103309	3.44724
	4.64654	0.963827	0.100787	3.44704
	4.64756	0.970629	0.0982653	3.44682
	4.6486	0.977402	0.0957434	3.44661
	4.64965	0.984145	0.0932221	3.44638
	4.65072	0.990857	0.0907019	3.44616
	4.65181	0.99754	0.0881835	3.44593
	4.65292	1.00419	0.0856673	3.44569
	4.65405	1.01081	0.083154	3.44545
	4.6552	1.0174	0.0806441	3.44521
	4.65636	1.02396	0.0781381	3.44496
	4.65754	1.03049	0.0756366	3.44472
	4.65874	1.03699	0.0731401	3.44446
	4.65996	1.04346	0.0706493	3.44421
	4.66119	1.0499	0.0681645	3.44395
	4.66244	1.0563	0.0656864	3.4437
	4.66371	1.06268	0.0632154	3.44344
	4.66499	1.06902	0.0607522	3.44318
	4.66629	1.07533	0.0582972	3.44292
	4.6676	1.08161	0.055851	3.44266
	4.66893	1.08786	0.053414	3.44239
	4.67027	1.09408	0.0509867	3.44213
	4.67163	1.10026	0.0485697	3.44187
	4.67301	1.10642	0.0461634	3.44161
	4.6744	1.11254	0.0437684	3.44135
	4.6758	1.11863	0.041385	3.44109
	4.67722	1.12469	0.0390139	3.44083
	4.67865	1.13072	0.0366553	3.44057
	4.6801	1.13672	0.0343099	3.44032
	4.68156	1.14268	0.031978	3.44006
	4.68304	1.14862	0.02966	3.43981
	4.68453	1.15453	0.0273566	3.43956
	4.68604	1.1604	0.025068	3.43932
	4.68755	1.16625	0.0227948	3.43907
	4.68908	1.17207	0.0205373	3.43883
	4.69063	1.17785	0.018296	3.4386
	4.69219	1.18361	0.0160713	3.43836
	4.69376	1.18934	0.0138637	3.43813
	4.69534	1.19504	0.0116736	3.43791
	4.69694	1.20071	0.00950128	3.43769
	4.69855	1.20635	0.00734729	3.43747
	4.70017	1.21197	0.00521199	3.43726
	4.70181	1.21756	0.00309579	3.43705
	4.70346	1.22312	0.000999069	3.43685
	4.70512	1.22866	-0.00107777	3.43666
	4.7068	1.23417	-0.00313433	3.43647
	4.70848	1.23966	-0.00517023	3.43629
	4.71018	1.24512	-0.00718507	3.43611
	4.7119	1.25056	-0.00917847	3.43594
	4.71362	1.25598	-0.01115	3.43578
	4.71536	1.26137	-0.0130994	3.43562
	4.71711	1.26674	-0.0150262	3.43547
	4.71887	1.27209	-0.0169301	3.43533
	4.72065	1.27741	-0.0188106	3.43519
	4.72244	1.28272	-0.0206674	3.43506
	4.72424	1.288	-0.0225002	3.43493
	4.72606	1.29327	-0.0243086	3.43482
	4.72789	1.29852	-0.0260922	3.43471
	4.72973	1.30375	-0.0278508	3.4346
	4.73159	1.30896	-0.0295839	3.43451
	4.73346	1.31415	-0.0312914	3.43442
	4.73535	1.31933	-0.0329728	3.43433
	4.73725	1.32449	-0.0346279	3.43426
	4.73916	1.32964	-0.0362564	3.43419
	4.74109	1.33477	-0.0378581	3.43413
	4.74303	1.33989	-0.0394327	3.43408
	4.74499	1.345	-0.0409799	3.43403
	4.74697	1.35009	-0.0424997	3.43399
	4.74896	1.35518	-0.0439917	3.43396
	4.75096	1.36025	-0.0454557	3.43393
	4.75298	1.36531	-0.0468916	3.43391
	4.75502	1.37037	-0.0482992	3.4339
	4.75708	1.37541	-0.0496783	3.43389
	4.75915	1.38045	-0.0510288	3.43389
	4.76124	1.38548	-0.0523506	3.43389
	4.76335	1.3905	-0.0536433	3.4339
	4.76547	1.39552	-0.0549071	3.43391
	4.76761	1.40052	-0.0561417	3.43393
	4.76977	1.40553	-0.0573469	3.43395
	4.77195	1.41052	-0.0585228	3.43398
	4.77415	1.41552	-0.0596692	3.43401
	4.77637	1.42051	-0.0607861	3.43404
	4.7786	1.42549	-0.0618732	3.43408
	4.78086	1.43047	-0.0629306	3.43412
	4.78313	1.43545	-0.0639583	3.43416
	4.78542	1.44043	-0.0649559	3.4342
	4.78774	1.44541	-0.0659237	3.43425
	4.79007	1.45038	-0.0668613	3.4343
	4.79242	1.45535	-0.0677688	3.43435
	4.79479	1.46033	-0.0686461	3.4344
	4.79718	1.4653	-0.069493	3.43445
	4.7996	1.47028	-0.0703095	3.4345
	4.80203	1.47525	-0.0710954	3.43455
	4.80448	1.48023	-0.0718508	3.4346
	4.80696	1.48521	-0.0725754	3.43464
	4.80945	1.49019	-0.0732692	3.43469
	4.81196	1.49518	-0.0739319	3.43474
	4.8145	1.50016	-0.0745636	3.43478
	4.81705	1.50516	-0.075164	3.43482
	4.81963	1.51015	-0.0757331	3.43486
	4.82222	1.51515	-0.0762706	3.4349
	4.82484	1.52015	-0.0767764	3.43494
	4.82747	1.52516	-0.0772505	3.43497
	4.83013	1.53017	-0.0776925	3.435
	4.8328	1.53519	-0.0781025	3.43502
	4.8355	1.54022	-0.0784802	3.43504
	4.83822	1.54525	-0.0788254	3.43506
	4.84095	1.55029	-0.0791381	3.43508
	4.84371	1.55533	-0.0794179	3.43509
	4.84648	1.56038	-0.0796649	3.43509
	4.84928	1.56544	-0.0798787	3.43509
	4.85209	1.5705	-0.0800593	3.43509
	4.85493	1.57557	-0.0802065	3.43509
	4.85778	1.58065	-0.0803202	3.43508
	4.86066	1.58574	-0.0804001	3.43506
	4.86355	1.59083	-0.0804462	3.43504
	4.86646	1.59594	-0.0804584	3.43502
	4.86939	1.60105	-0.0804364	3.435
	4.87234	1.60617	-0.0803803	3.43497
	4.8753	1.6113	-0.0802898	3.43494
	4.87829	1.61644	-0.080165	3.4349
	4.88129	1.62159	-0.0800056	3.43486
	4.88431	1.62675	-0.0798117	3.43482
	4.88735	1.63193	-0.0795832	3.43477
	4.8904	1.63711	-0.07932	3.43472
	4.89347	1.6423	-0.0790219	3.43466
	4.89656	1.6475	-0.078689	3.43461
	4.89966	1.65272	-0.0783213	3.43454
	4.90279	1.65795	-0.0779185	3.43447
	4.90592	1.66319	-0.0774808	3.4344
	4.90908	1.66844	-0.0770081	3.43433
	4.91224	1.6737	-0.0765003	3.43425
	4.91542	1.67897	-0.0759574	3.43416
	4.91862	1.68426	-0.0753793	3.43407
	4.92183	1.68956	-0.0747662	3.43398
	4.92506	1.69487	-0.0741178	3.43388
	4.9283	1.7002	-0.0734343	3.43378
	4.93155	1.70554	-0.0727157	3.43368
	4.93482	1.71089	-0.0719618	3.43357
	4.93809	1.71626	-0.0711727	3.43346
	4.94138	1.72163	-0.0703484	3.43334
	4.94468	1.72703	-0.0694889	3.43322
	4.948	1.73244	-0.0685942	3.43309
	4.95132	1.73786	-0.0676642	3.43296
	4.95465	1.74329	-0.066699	3.43283
	4.958	1.74874	-0.0656985	3.43268
	4.96135	1.75421	-0.0646627	3.43254
	4.96472	1.75969	-0.0635915	3.43239
	4.96809	1.76518	-0.062485	3.43223
	4.97147	1.77069	-0.0613431	3.43207
	4.97486	1.77621	-0.0601657	3.43191
	4.97826	1.78174	-0.0589527	3.43174
	4.98166	1.78729	-0.0577042	3.43156
	4.98508	1.79285	-0.05642	3.43138
	4.98849	1.79843	-0.0551	3.43119
	4.99192	1.80401	-0.0537441	3.431
	4.99535	1.80961	-0.0523523	3.4308
	4.99878	1.81523	-0.0509244	3.4306
	5.00222	1.82085	-0.0494603	3.43039
	5.00567	1.82649	-0.0479599	3.43017
	5.00912	1.83214	-0.046423	3.42995
	5.01257	1.8378	-0.0448496	3.42972
	5.01602	1.84347	-0.0432393	3.42949
	5.01948	1.84915	-0.0415922	3.42925
	5.02294	1.85484	-0.0399081	3.429
	5.0264	1.86055	-0.0381868	3.42875
	5.02986	1.86626	-0.0364281	3.42849
	5.03332	1.87198	-0.034632	3.42823
	5.03679	1.87772	-0.0327981	3.42795
	5.04025	1.88346	-0.0309265	3.42768
	5.04371	1.88921	-0.0290168	3.42739
	5.04717	1.89497	-0.027069	3.4271
	5.05063	1.90074	-0.0250828	3.4268
	5.05409	1.90651	-0.023058	3.4265
	5.05754	1.9123	-0.0209945	3.42618
	5.06099	1.91809	-0.0188921	3.42587
	5.06444	1.92388	-0.0167505	3.42554
	5.06788	1.92969	-0.0145695	3.42521
	5.07132	1.9355	-0.012349	3.42487
	5.07476	1.94132	-0.0100886	3.42453
	5.07818	1.94714	-0.00778817	3.42418
	5.08161	1.95297	-0.00544747	3.42382
	5.08502	1.95881	-0.00306626	3.42345
	5.08843	1.96465	-0.000644302	3.42308
	5.09183	1.97049	0.00181866	3.4227
	5.09522	1.97634	0.00432286	3.42231
	5.0986	1.9822	0.00686855	3.42192
	5.10197	1.98806	0.00945601	3.42152
	5.10533	1.99392	0.0120855	3.42111
	5.10867	1.99978	0.0147573	3.4207
	5.11201	2.00566	0.0174716	3.42028
	5.11533	2.01153	0.0202288	3.41985
	5.11865	2.01741	0.0230292	3.41941
	5.12194	2.02329	0.0258731	3.41897
	5.12522	2.02917	0.0287608	3.41853
	5.12849	2.03506	0.0316925	3.41807
	5.13174	2.04095	0.0346688	3.41761
	5.13497	2.04684	0.0376898	3.41715
	5.13819	2.05274	0.0407559	3.41667
	5.14139	2.05863	0.0438675	3.41619
	5.14457	2.06453	0.0470249	3.41571
	5.14773	2.07043	0.0502285	3.41521
	5.15086	2.07634	0.0534786	3.41471
	5.15398	2.08224	0.0567756	3.4142
	5.15708	2.08814	0.0601198	3.41368
	5.16015	2.09405	0.0635116	3.41316
	5.16321	2.09996	0.0669514	3.41263
	5.16623	2.10586	0.0704395	3.41209
	5.16924	2.11177	0.0739764	3.41154
	5.17221	2.11767	0.0775623	3.41098
	5.17517	2.12358	0.0811976	3.41042
	5.17809	2.12948	0.0848828	3.40985
	5.18099	2.13539	0.0886182	3.40927
	5.18387	2.14129	0.0924041	3.40868
	5.18671	2.14719	0.0962408	3.40808
	5.18952	2.1531	0.100129	3.40747
	5.19231	2.15899	0.104068	3.40686
	5.19506	2.16489	0.10806	3.40623
	5.19779	2.17079	0.112103	3.4056
	5.20048	2.17668	0.116199	3.40496
	5.20314	2.18257	0.120348	3.4043
	5.20577	2.18846	0.124551	3.40363
	5.20836	2.19435	0.128806	3.40296
	5.21092	2.20023	0.133115	3.40227
	5.21344	2.20611	0.137479	3.40156
	5.21593	2.21199	0.141896	3.40085
	5.21838	2.21786	0.146368	3.40012
	5.2208	2.22372	0.150895	3.39938
	5.22317	2.22959	0.155477	3.39862
	5.22551	2.23544	0.160114	3.39785
	5.22781	2.2413	0.164807	3.39707
	5.23007	2.24714	0.169555	3.39627
	5.23229	2.25298	0.17436	3.39545
	5.23446	2.25882	0.17922	3.39462
	5.2366	2.26464	0.184137	3.39377
	5.23869	2.27047	0.189111	3.3929
	5.24074	2.27628	0.194142	3.39202
	5.24274	2.28209	0.051701	3.39111
	5.2447	2.28789	0.0565266	3.39019
	5.24661	2.29369	0.0617863	3.38924
	5.24848	2.29948	0.0682412	3.38828
	5.25029	2.30526	0.0766904	3.38729
	5.25206	2.31104	0.0877906	3.38628
	5.25378	2.31681	0.101773	3.38525
	5.25545	2.32257	0.118181	3.3842
	5.25707	2.32833	0.13583	3.38312
	5.25863	2.33408	0.153086	3.38202
	5.26015	2.33982	0.168272	3.3809
	5.26161	2.34555	0.179975	3.37975
	5.26301	2.35128	0.187162	3.37857
	5.26436	2.357	0.18916	3.37737
	5.26565	2.36271	0.185651	3.37614
	5.26689	2.36842	0.17669	3.37488
	5.26807	2.37412	0.162718	3.3736
	5.26919	2.37982	0.144535	3.37228
	5.27025	2.38551	0.123212	3.37094
	5.27125	2.39119	0.099984	3.36956
	5.27219	2.39687	0.076125	3.36816
	5.27307	2.40255	0.0528005	3.36672
	5.27388	2.40822	0.0309203	3.36525
	5.27463	2.41388	0.011055	3.36375
	5.27531	2.41954	-0.00655244	3.36221
	5.27593	2.42519	-0.0219034	3.36065
	5.27648	2.43084	-0.0351684	3.35904
	5.27697	2.43649	-0.0466467	3.35741
	5.27739	2.44213	-0.0566996	3.35573
	5.27773	2.44777	-0.0656378	3.35403
	5.27801	2.45341	-0.0736157	3.35228
	5.27822	2.45905	-0.0805791	2.7968
	5.27836	2.46468	-0.0862743	2.76261
	5.27842	2.47032	-0.0903241	2.73652
	5.27841	2.47595	-0.0923579	2.71964
	5.27833	2.48158	-0.0921195	2.71129
	5.27817	2.48722	-0.0894581	2.70849
	5.27793	2.49285	-0.0841966	2.70759
	5.27762	2.49849	-0.0759988	2.70637
	5.27723	2.50412	-0.0643816	2.70416
	5.27677	2.50976	-0.0489089	2.70106
	5.27622	2.5154	-0.0294221	2.69735
	5.2756	2.52105	-0.00612608	2.69331
	5.27489	2.5267	0.0204721	2.68924
	5.2741	2.53235	0.0496303	2.68554
	5.27323	2.538	0.0803838	2.68262
	5.27228	2.54366	0.111566	2.68098
	5.27124	2.54933	0.14186	2.6811
	5.27011	2.555	0.169878	2.68356
	5.2689	2.56067	0.194316	2.68898
	5.26761	2.56635	0.214171	2.69812
	5.26622	2.57204	0.228908	2.7119
	5.26475	2.57774	0.238472	2.7314
	5.26318	2.58345	0.243191	2.75738
	5.26153	2.58916	0.243643	2.78892
	5.25978	2.59488	0.240549	2.82297
	5.25794	2.60062	0.234658	2.8562
	5.25601	2.60636	0.226646	2.88683
	5.25398	2.61211	0.217056	2.91451
	5.25186	2.61788	0.206289	2.93948
	5.24964	2.62365	0.194661	2.96205
	5.24733	2.62944	0.182453	2.98252
	5.24491	2.63523	0.169907	3.00118
	5.2424	2.64104	0.157187	3.01832
	5.23979	2.64686	0.144374	3.03426
	5.23707	2.65269	0.131529	3.04929
	5.23426	2.65853	0.118753	3.06375
	5.23134	2.66439	0.106188	3.07794
	5.22831	2.67026	0.0939768	3.09218
	5.22518	2.67614	0.0822434	3.10679
	5.22195	2.68203	0.0711265	3.12203
	5.21861	2.68793	0.0608181	3.13809
	5.21516	2.69385	0.0515668	3.15489
	5.2116	2.69978	0.0436299	3.17136
	5.20794	2.70573	0.0371906	3.18559
	5.20416	2.71168	0.0322888	3.19627
	5.20027	2.71766	0.0288146	3.20353
	5.19627	2.72364	0.0265671	3.20847
	5.19215	2.72964	0.0253345	3.21237
	5.18792	2.73565	0.0249448	3.21638
	5.18357	2.74167	0.0252728	3.22141
	5.17911	2.74771	0.0262254	3.22824
	5.17453	2.75376	0.0277258	3.23747
	5.16983	2.75983	0.0296798	3.24957
	5.16501	2.7659	0.0319113	3.26481
	5.16008	2.77199	0.0341307	3.28331
	5.15502	2.7781	0.0359712	3.30498
	5.14983	2.78422	0.0369933	3.32953
	5.14453	2.79035	0.0366095	3.35648
	5.1391	2.7965	0.0340661	3.38517
	5.13354	2.80266	0.0285174	3.41469
	5.12786	2.80883	0.0190569	3.44375
	5.12205	2.81502	0.00472935	3.47055
	5.11611	2.82122	-0.0153297	3.49334
	5.11004	2.82743	-0.0416682	3.51149
	5.10384	2.83366	-0.0743425	3.52571
	5.09751	2.8399	-0.112838	3.53734
	5.09105	2.84615	-0.156087	3.54765
	5.08445	2.85242	-0.202606	3.55762
	5.07772	2.8587	-0.250721	3.56793
	5.07085	2.865	-0.298793	3.57911
	5.06384	2.8713	-0.345349	3.59153
	5.0567	2.87762	-0.389143	3.60552
	5.04942	2.88396	-0.429174	3.62141
	5.042	2.8903	-0.464719	3.6396
	5.03443	2.89666	-0.495319	3.6606
	5.12296	2.90303	-0.520701	3.68508
	5.14359	2.90941	-0.54068	3.71387
	5.16572	2.91581	-0.555088	3.74798
	5.18919	2.92222	-0.563751	3.78813
	5.21381	2.92864	-0.566493	3.83348
	5.23935	2.93507	-0.563172	3.88096
	5.26557	2.94151	-0.553706	3.92704
	5.29221	2.94796	-0.538093	3.9697
	5.31897	2.95443	-0.516389	4.00858
	5.34558	2.9609	-0.488641	4.04419
	5.37173	2.96739	-0.454849	4.07728
	5.39716	2.97388	-0.414928	4.10874
	5.42161	2.98038	-0.368679	4.13964
	5.44484	2.9869	-0.315707	4.17121
	5.46662	2.99342	-0.255365	4.20484
	5.4867	2.99995	-0.186764	4.24191
	5.50486	3.00649	-0.108849	4.2838
	5.52087	3.01303	-0.0204815	4.33182
	5.53457	3.01958	0.0795051	4.38723
	5.5458	3.02614	0.192271	4.45115
	5.55449	3.03271	0.318877	4.52468
	5.56062	3.03928	0.46016	4.60886
	5.56425	3.04586	0.616609	4.70419
	5.5655	3.05244	0.78826	4.80915
	5.56455	3.05903	0.974576	4.91985
	5.56163	3.06562	1.17442	5.03187
	5.55698	3.07221	1.38621	5.14203
	5.55089	3.07881	1.60812	5.2483
	5.54367	3.08541	1.83826	5.34895
	5.53564	3.09202	2.07477	5.44222
	5.52711	3.09862	2.31577	5.52635
	5.51835	3.10523	2.55935	5.59981
	5.50961	3.11183	2.80345	5.66136
	5.50107	3.11844	3.04585	5.71015
	5.49286	3.12504	3.28416	5.74569
	5.48503	3.13164	3.51603	5.76781
	5.4776	3.13824	3.73922	5.77662
	5.47052	3.14483	3.9517	5.77248
	5.46372	3.15142	4.15165	5.75598
	5.45712	3.158	4.33749	5.72788
	5.45062	3.16458	4.50795	5.68906
	5.44415	3.17115	4.66203	5.64027
	5.43763	3.17771	4.79902	5.58136
	5.43099	3.18426	4.91851	5.51144
	5.42415	3.19081	5.02045	5.4302
	5.41703	3.19734	5.10501	5.33882
	5.40951	3.20386	5.17258	5.2395
	5.40148	3.21037	5.22363	5.13457
	5.3928	3.21686	5.25866	5.02612
	5.38334	3.22335	5.27815	4.91575
	5.37295	3.22981	5.28245	4.80457
	5.36145	3.23626	5.27182	4.69323
	5.34867	3.24269	5.24639	4.58181
	5.33443	3.24911	5.20622	4.46986
	5.31853	3.2555	5.15133	4.3565
	5.30078	3.26187	5.08185	4.24048
	5.28099	3.26823	4.99805	4.12029
	5.25897	3.27456	4.90035	3.99425
	5.23454	3.28086	4.78923	3.86065
	5.20753	3.28715	4.66507	3.71777
	5.17779	3.2934	4.52813	3.56388
	5.14522	3.29964	4.37843	3.39724
	5.10976	3.30584	4.21587	3.21672
	5.07141	3.31202	4.04028	3.02271
	5.03022	3.31816	3.85157	2.81731
	4.98631	3.32428	3.64975	2.60353
	4.93986	3.33037	3.43505	2.38454
	4.89115	3.33642	3.20803	2.16339
	4.84048	3.34244	2.96978	1.94299
	4.78826	3.34843	2.72206	1.72604
	4.73496	3.35438	2.46729	1.5151
	4.68113	3.36029	2.20832	1.31254
	4.62743	3.36617	1.94829	1.12056
	4.57458	3.372	1.69035	0.941161
	4.52339	3.3778	1.43747	0.77619
	4.47474	3.38357	1.19234	0.627309
	4.42954	3.38929	0.957333	0.496029
	4.38873	3.39496	0.734541	0.383751
	4.35328	3.4006	0.525759	0.291336
	4.32411	3.4062	0.332483	0.217786
	4.30215	3.41175	0.155871	0.159666
	4.28828	3.41725	-0.00329832	0.112836
	4.28333	3.42271	-0.144646	0.0745059
	4.2881	3.42813	-0.268148	0.043453
	4.3033	3.43349	-0.374034	0.019216
	4.3296	3.43881	-0.46269	0.00151208
	4.36743	3.44408	-0.534571	-0.00993114
	4.41694	3.44931	-0.59017	-0.0153556
	4.478	3.45448	-0.62998	-0.0149159
	4.55012	3.4596	-0.654462	-0.00863579
	4.63255	3.46467	-0.664024	0.0036195
	4.72428	3.46968	-0.659007	0.0221608
	4.82405	3.47464	-0.639688	0.0474844
	4.93035	3.47955	-0.606283	0.0802668
	5.04143	3.48441	-0.558958	0.121348
	5.15529	3.48921	-0.497846	0.17172
	5.26978	3.49395	-0.423054	0.23252
	5.38274	3.49863	-0.334646	0.304532
	5.49205	3.50326	-0.232647	0.386815
	5.59581	3.50783	-0.117047	0.476264
	5.69244	3.51234	0.0121646	0.569483
	5.78062	3.5168	0.154923	0.664629
	5.85932	3.52119	0.31098	0.761329
	5.92765	3.52551	0.479845	0.859766
	5.98493	3.52978	0.660776	0.960123
	6.03072	3.53398	0.852798	1.06245
	6.06489	3.53812	1.05474	1.16672
	6.08755	3.5422	1.26527	1.27281
	6.09905	3.5462	1.48286	1.38054
	6.09985	3.55014	1.70578	1.48958
	6.09054	3.55401	1.93214	1.59945
	6.07181	3.55781	2.16005	1.70954
	6.04443	3.56154	2.38765	1.81899
	6.00916	3.56519	2.6131	1.92679
	5.96672	3.56877	2.83453	2.03174
	5.91769	3.57228	3.05005	2.13268
	5.86248	3.57571	3.25783	2.22824
	5.8013	3.57907	3.45617	2.31638
	5.7342	3.58234	3.64358	2.39444
	5.6611	3.58554	3.81876	2.46064
	5.58187	3.58866	3.98067	2.51485
	5.49634	3.59169	4.12856	2.55809
	5.4044	3.59464	4.26207	2.59165
	5.30594	3.59751	4.38124	2.61673
	5.20086	3.60029	4.48648	2.63435
	5.08888	3.60298	4.5784	2.64542
	4.96949	3.60559	4.65772	2.65076
	4.84199	3.6081	4.72513	2.65107
	4.70551	3.61052	4.78125	2.64692
	4.55911	3.61285	4.82665	2.63871
	4.40184	3.61509	4.86188	2.62663
	4.23275	3.61723	4.88751	2.61071
	4.051	3.61927	4.90411	2.59084
	3.85611	3.62122	4.91223	2.56684
	3.648	3.62306	4.91232	2.53843
	3.42693	3.6248	4.90474	2.505
	3.19355	3.62644	4.88974	2.46536
	2.94926	3.62798	4.86746	2.41811
	2.69632	3.62941	4.83795	2.36258
	2.43776	3.63074	4.80117	2.29907
	2.177	3.63196	4.75708	2.22814
	1.91752	3.63306	4.70565	2.15001
	1.66266	3.63406	4.64684	2.06444
	1.41542	3.63494	4.58065	1.97088
	1.17844	3.63571	4.5071	1.86862
	0.953936	3.63637	4.42614	1.75714
	0.743627	3.63691	4.3376	1.63637
	0.548784	3.63733	4.24122	1.50679
	0.370228	3.63763	4.13667	1.36937
	0.208368	3.63781	4.02355	1.22558
	0.0632386	3.63787	3.90138	1.07737
	-0.0654537	3.6378	3.76978	0.927182
	-0.178283	3.63761	3.62871	0.777781
	-0.276059	3.42669	3.4785	0.631669
	-0.359785	3.42719	3.31992	0.489668
	-0.430599	3.43142	3.15407	0.350293
	-0.489718	3.43911	2.98232	0.211382
	-0.538389	3.4498	2.80623	0.0720381
	-0.577834	3.46292	2.62747	-0.0672161
	-0.609209	3.47762	2.44778	-0.205238
	-0.633579	3.49225	2.26892	-0.340828
	-0.651885	3.50418	2.09265	-0.472918
	-0.66492	3.51079	1.92064	-0.600589
	-0.673293	3.51082	1.75445	-0.723038
	-0.677411	3.5045	1.59546	-0.839508
	-0.677454	3.49283	1.4449	-0.949212
	-0.673367	3.47688	1.30378	-1.05129
	-0.664875	3.45767	1.17292	-1.14482
	-0.651503	3.43615	1.05296	-1.22886
	-0.632624	3.41328	0.944382	-1.3024
	-0.607503	3.39001	0.847571	-1.36438
	-0.575341	3.36734	0.76278	-1.41362
	-0.535305	3.34628	0.690154	-1.44929
	-0.486533	3.32792	0.629735	-1.47218
	-0.428139	3.31341	0.581466	-1.48513
	-0.35927	3.30404	0.545221	-1.4913
	-0.279229	3.30128	0.520843	-1.4924
	-0.187569	3.30678	0.508166	-1.4889
	-0.0841327	3.32182	0.507033	-1.48084
	0.0309198	3.34571	0.517283	-1.46822
	0.157106	3.37506	0.538741	-1.45107
	0.293669	3.40573	0.571218	-1.4294
	0.439619	3.43506	0.614516	-1.40318
	0.593734	3.46197	0.66844	-1.37249
	0.754532	3.48612	0.732801	-1.33745
	0.920287	3.5074	0.807414	-1.2982
	1.08905	3.52583	0.892098	-1.25476
	1.25866	3.5415	0.986695	-1.20703
	1.42679	3.55466	1.09108	-1.15487
	1.591	3.56568	1.20513	-1.09822
	1.74879	3.57503	1.32867	-1.03716
	1.89769	3.58329	1.46139	-0.972271
	2.03533	3.59113	1.60281	-0.905224
	2.15953	3.59932	1.75231	-0.838612
	2.26845	3.60867	1.90901	-0.774471
	2.36063	3.62007	2.07182	-0.713296
	2.43504	3.63449	2.23946	-0.654485
	2.49112	3.65256	2.41049	-0.597171
	2.52876	3.67355	2.58335	-0.540637
	2.54824	3.69524	2.75637	-0.484403
	2.55006	3.71551	2.92776	-0.428208
	2.5349	3.73371	3.09573	-0.372033
	2.5036	3.75033	3.25853	-0.316154
	2.45724	3.76618	3.41454	-0.261148
	2.397	3.782	3.56229	-0.207805
	2.3241	3.79835	3.7005	-0.157029
	2.23975	3.8157	3.82811	-0.10979
	2.14508	3.83438	3.94423	-0.0671457
	2.04114	3.85465	4.04815	-0.03027
	1.92887	3.87663	4.13934	-0.00050596
	1.80914	3.90034	4.2175	0.020458
	1.68272	3.92569	4.28259	0.0304851
	1.55038	3.95243	4.33488	0.0276472
	1.41282	3.98019	4.37496	0.011364
	1.2705	4.00844	4.40367	-0.0173223
	1.12352	4.03647	4.42202	-0.0564832
	0.97152	4.06324	4.43109	-0.104019
	0.813757	4.08699	4.432	-0.157929
	0.649274	4.10568	4.42578	-0.216337
	0.477018	4.11816	4.41339	-0.277443
	0.295864	4.12474	4.39567	-0.339496
	0.104591	4.12661	4.37335	-0.400789
	-0.097958	4.12512	4.34702	-0.459656
	-0.312566	4.12146	4.31715	-0.51445
	-0.539387	4.11666	4.28403	-0.563532
	-0.777801	4.11162	4.24777	-0.605265
	-1.02637	4.1071	4.20832	-0.638002
	-1.28292	4.10378	4.16553	-0.660082
	-1.54466	4.10221	4.11917	-0.670314
	-1.80848	4.10283	4.06902	-0.669392
	-2.07112	4.10605	4.01491	-0.660592
	-2.32938	4.11217	3.95672	-0.648101
	-2.58025	4.12143	3.89438	-0.634989
	-2.82102	4.13398	3.82793	-0.623058
	-3.04937	4.14974	3.75751	-0.613683
	-3.26337	4.16774	3.68333	-0.608212
	-3.46154	4.18582	3.60557	-0.607802
	-3.64281	4.20163	3.52435	-0.613174
	-3.80654	4.21398	3.43968	-0.624529
	-3.95238	4.22301	3.35143	-0.641568
	-4.08028	4.22945	3.25933	-0.663559
	-4.19041	4.23396	3.16302	-0.689405
	-4.28317	4.23697	3.06219	-0.717732
	-4.35915	4.23878	2.95673	-0.74698
	-4.41912	4.23966	2.84685	-0.775478
	-4.46401	4.23993	2.73304	-0.80149
	-4.49486	4.24002	2.61607	-0.823231
	-4.51278	4.24046	2.4969	-0.839356
	-4.5189	4.24187	2.37667	-0.850319
	-4.51438	4.24489	2.2566	-0.85881
	-4.50035	4.25032	2.1379	-0.867894
	-4.4779	4.25917	2.02175	-0.872182
	-4.44805	4.27275	1.90926	-0.878748
	-4.41174	4.29218	1.80145	-0.887135
	-4.36978	4.31672	1.69924	-0.896862
	-4.32282	4.34307	1.60339	-0.907552
	-4.27141	4.36731	1.51453	-0.918891
	-4.21593	4.38708	1.43311	-0.930567
	-4.15665	4.40168	1.35949	-0.942228
	-4.09373	4.4112	1.29385	-0.95348
	-4.0272	4.41584	1.23629	-0.963921
	-3.95705	4.41586	1.18676	-0.973171
	-3.88319	4.41148	1.14509	-0.980902
	-3.8055	4.40299	1.111	-0.986865
	-3.7238	4.39073	1.08412	-0.99089
	-3.6379	4.37508	1.06398	-0.992882
	-3.54754	4.35639	1.05008	-0.992979
	-3.45241	4.33496	1.0419	-0.991922
	-3.35223	4.31102	1.0389	-0.990865
	-3.24677	4.28478	1.04054	-0.990458
	-3.13592	4.25653	1.04629	-0.990394
	-3.01974	4.22667	1.05568	-0.989859
	-2.89846	4.19536	1.06829	-0.988075
	-2.7725	4.16151	1.08381	-0.984508
	-2.64253	4.12254	1.10205	-0.978887
	-2.50943	4.07594	1.1229	-0.971178
	-2.3742	4.02068	1.14642	-0.96154
	-2.23795	3.95691	1.17273	-0.95028
	-2.10178	3.88505	1.20207	-0.937796
	-1.96676	3.8054	1.23467	-0.924546
	-1.83397	3.7181	1.27085	-0.911023
	-1.70447	3.62317	1.31096	-0.897751
	-1.57935	3.52049	1.35543	-0.885278
	-1.4597	3.40999	1.4048	-0.874159
	-1.34659	3.29182	1.45959	-0.864934
	-1.24101	3.16645	1.52026	-0.858142
	-1.14382	3.03469	1.58711	-0.854304
	-1.05574	2.89759	1.66023	-0.853716
	-0.977344	2.75634	1.73953	-0.856202
	-0.908959	2.61216	1.82472	-0.861176
	-0.850647	2.46625	1.91523	-0.867923
	-0.802193	2.31955	2.01035	-0.875799
	-0.763155	2.17233	2.10918	-0.884278
	-0.732933	2.02447	2.21072	-0.892954
	-0.71085	1.87659	2.31386	-0.901519
	-0.69622	1.73057	2.41738	-0.909754
	-0.688399	1.5889	2.52	-0.917512
	-0.686811	1.45398	2.62042	-0.924705
	-0.690954	1.32774	2.71739	-0.931296
	-0.700395	1.21164	2.80974	-0.937287
	-0.714763	1.10665	2.89639	-0.942723
	-0.733749	1.01335	2.97643	-0.949554
	-0.757102	0.931896	3.04914	-0.956328
	-0.784607	0.862068	3.11404	-0.963047
	-0.816076	0.803349	3.17099	-0.96971
	-0.851399	0.754971	3.22012	-0.976318
	-0.890669	0.715983	3.26186	-0.982872
	-0.934302	0.685309	3.29679	-0.989373
	-0.983084	0.661788	3.32561	-0.995821
	-1.03815	0.644028	3.34903	-1.00222
	-1.10092	0.629869	3.36775	-1.00856
	-1.17291	0.616198	3.38244	-1.01485
	-1.25551	0.599968	3.39378	-1.02109
	-1.34983	0.579556	3.40238	-1.02728
	-1.45669	0.554928	3.40879	-1.03342
	-1.57641	0.526895	3.41349	-1.03951
	-1.70869	0.496521	3.41686	-1.04556
	-1.85254	0.464954	3.4192	-1.05155
	-2.00635	0.433459	3.4207	-1.0575
	-2.16802	0.403448	3.42151	-1.06339
	-2.33512	0.376479	3.42161	-1.06925
	-2.50507	0.354243	3.4209	-1.07505
	-2.67532	0.338565	3.4191	-1.08081
	-2.84339	0.33142	3.4158	-1.08652
	-3.00703	0.334943	3.41055	-1.09219
	-3.16423	0.35139	3.40283	-1.09782
	-3.31327	0.383077	3.39215	-1.1034
	-3.45276	0.432319	3.37806	-1.10894
	-3.58161	0.500833	3.36011	-1.11444
	-3.69904	0.588092	3.3378	-1.1199
	-3.80457	0.690617	3.31055	-1.12532
	-3.89797	0.803938	3.27775	-1.1307
	-3.97922	0.924788	3.23875	-1.13604
	-4.04852	1.05121	3.19289	-1.14134
	-4.10617	1.18161	3.13965	-1.1466
	-4.15264	1.31419	3.07889	-1.15183
	-4.18845	1.44677	3.01095	-1.15702
	-4.21421	1.57696	2.93663	-1.16218
	-4.23059	1.70242	2.85707	-1.1673
	-4.2383	1.8211	2.77367	-1.17239
	-4.23802	1.93121	2.68795	-1.17744
	-4.23048	2.03127	2.60141	-1.18246
	-4.21635	2.12013	2.51555	-1.18745
	-4.19629	2.19697	2.43176	-1.19241
	-4.17095	2.2613	2.35132	-1.19734
	-4.14093	2.31303	2.27533	-1.20224
	-4.1068	2.35243	2.20472	-1.20711
	-4.06913	2.37981	2.14016	-1.21195
	-4.02841	2.39444	2.08207	-1.21676
	-3.98511	2.39432	2.03063	-1.22155
	-3.93966	2.37781	1.98579	-1.22631
	-3.89244	2.34494	1.94727	-1.23105
	-3.84379	2.29707	1.9146	-1.23575
	-3.79402	2.23605	1.88719	-1.24044
	-3.7434	2.16375	1.86432	-1.2451
	-3.69215	2.08194	1.84524	-1.24974
	-3.64044	1.99228	1.82922	-1.25435
	-3.58841	1.89632	1.81559	-1.25894
	-3.53615	1.79553	1.80374	-1.26351
	-3.48374	1.69129	1.7932	-1.26806
	-3.43119	1.58478	1.78359	-1.27259
	-3.37846	1.47671	1.77464	-1.2771
	-3.32544	1.36726	1.7662	-1.28159
	-3.27192	1.25605	1.75826	-1.28606
	-3.21761	1.14209	1.75092	-1.29051
	-3.16213	1.02384	1.74444	-1.29495
	-3.10507	0.899157	1.7392	-1.29936
	-3.04604	0.765089	1.73571	-1.30376
	-2.9848	0.618346	1.73456	-1.30814
	-2.92126	0.456583	1.73639	-1.3125
	-2.85557	0.279238	1.74192	-1.31685
	-2.78812	0.087199	1.75187	-1.32118
	-2.71953	-0.117864	1.767	-1.32549
	-2.65056	-0.333894	1.78803	-1.32978
	-2.58199	-0.558576	1.81562	-1.33406
	-2.51458	-0.789397	1.85038	-1.33833
	-2.44898	-1.02372	1.89285	-1.34257
	-2.38577	-1.25888	1.94349	-1.34681
	-2.32546	-1.4923	2.00261	-1.35102
	-2.26851	-1.72158	2.0703	-1.35522
	-2.21537	-1.94458	2.14639	-1.35941
	-2.16653	-2.15951	2.23044	-1.36358
	-2.12245	-2.36498	2.32181	-1.36773
	-2.08355	-2.55999	2.41971	-1.37188
	-2.05013	-2.74413	2.52323	-1.37601
	-2.02232	-2.91811	2.63135	-1.38012
	-2.0001	-3.08384	2.74291	-1.38423
	-1.98323	-3.24349	2.85654	-1.38831
	-1.97132	-3.39804	2.97078	-1.39239
	-1.96386	-3.54716	3.08406	-1.39645
	-1.96023	-3.68994	3.19486	-1.40051
	-1.95977	-3.82548	3.30173	-1.40454
	-1.9618	-3.953	3.4034	-1.40857
	-1.96572	-4.07184	3.49876	-1.41259
	-1.97097	-4.18134	3.58694	-1.41659
	-1.97709	-4.28084	3.66728	-1.42058
	-1.98375	-4.36962	3.7394	-1.42456
	-1.99074	-4.44686	3.80311	-1.42853
	-1.99797	-4.51166	3.85844	-1.43249
	-2.00549	-4.56297	3.90554	-1.43643
	-2.0135	-4.59959	3.94467	-1.44037
	-2.02228	-4.62019	3.97615	-1.4443
	-2.03222	-4.62326	4.00034	-1.44821
	-2.04374	-4.60775	4.01759	-1.45212
	-2.05742	-4.57465	4.02825	-1.45602
	-2.07402	-4.5277	4.03268	-1.45991
	-2.09457	-4.47146	4.03126	-1.46379
	-2.1203	-4.40914	4.02438	-1.46766
	-2.1527	-4.34242	4.01241	-1.47152
	-2.19345	-4.27237	3.99568	-1.47538
	-2.2442	-4.19987	3.97448	-1.47923
	-2.30628	-4.12578	3.94906	-1.48306
	-2.38059	-4.0509	3.9196	-1.48689
	-2.46761	-3.97593	3.88622	-1.49072
	-2.56736	-3.90143	3.84898	-1.49453
	-2.67927	-3.82784	3.8079	-1.49834
	-2.80217	-3.75547	3.763	-1.50214
	-2.93438	-3.68448	3.71434	-1.50594
	-3.07386	-3.61486	3.66202	-1.50972
	-3.2184	-3.54648	3.60621	-1.5135
	-3.36575	-3.4791	3.54713	-1.51728
	-3.51372	-3.41251	3.48503	-1.52104
	-3.66024	-3.34694	3.42016	-1.5248
	-3.80343	-3.28407	3.35274	-1.52856
	-3.94163	-3.22712	3.28296	-1.5323
	-4.07342	-3.17917	3.2109	-1.53604
	-4.19764	-3.14181	3.13657	-1.53977
	-4.31336	-3.11541	3.05997	-1.5435
	-4.41987	-3.0999	2.98119	-1.54722
	-4.51667	-3.09519	2.90043	-1.55093
	-4.60347	-3.10123	2.81787	-1.55464
	-4.68013	-3.11801	2.73362	-1.55834
	-4.7467	-3.14559	2.64791	-1.56203
	-4.8034	-3.18406	2.56124	-1.56571
	-4.85054	-3.23341	2.4745	-1.56939
	-4.88858	-3.29355	2.38876	-1.57306
	-4.91804	-3.36419	2.30518	-1.57672
	-4.93947	-3.44487	2.22485	-1.58037
	-4.95343	-3.53497	2.14874	-1.58402
	-4.9605	-3.6338	2.07765	-1.58765
	-4.96116	-3.74062	2.0122	-1.59128
	-4.9559	-3.85489	1.95281	-1.59491
	-4.94509	-3.97676	1.89971	-1.59852
	-4.92911	-4.10673	1.85296	-1.60212
	-4.90827	-4.24455	1.81241	-1.60571
	-4.88288	-4.38871	1.77779	-1.60929
	-4.8532	-4.53703	1.74868	-1.61287
	-4.81951	-4.68737	1.72458	-1.61643
	-4.78206	-4.83784	1.70497	-1.61998
	-4.7411	-4.98677	1.6893	-1.62351
	-4.69689	-5.13268	1.67707	-1.62704
	-4.64965	-5.27433	1.66777	-1.63055
	-4.5996	-5.41088	1.66094	-1.63405
	-4.54692	-5.54193	1.65617	-1.63753
	-4.49177	-5.66755	1.65308	-1.641
	-4.43433	-5.78827	1.65132	-1.64445
	-4.3748	-5.90506	1.65056	-1.64789
	-4.31342	-6.01918	1.6505	-1.65131
	-4.25044	-6.13189	1.65085	-1.65472
	-4.18614	-6.24449	1.65136	-1.65811
	-4.12079	-6.35896	1.65186	-1.66148
	-4.05466	-6.47814	1.65227	-1.66484
	-3.988	-6.60465	1.65257	-1.66817
	-3.9211	-6.73945	1.65288	-1.67149
	-3.85427	-6.88166	1.65338	-1.67479
	-3.78795	-7.02938	1.65436	-1.67807
	-3.72267	-7.18042	1.65624	-1.68132
	-3.65905	-7.33258	1.65951	-1.68456
	-3.59778	-7.48368	1.66481	-1.68777
	-3.53957	-7.63158	1.67283	-1.69096
	-3.4851	-7.77425	1.68438	-1.69412
	-3.43496	-7.90976	1.70032	-1.69726
	-3.38966	-8.03634	1.72159	-1.70038
	-3.34956	-8.15233	1.7492	-1.70347
	-3.3149	-8.25616	1.78413	-1.70654
	-3.28578	-8.34628	1.82729	-1.70958
	-3.26214	-8.42111	1.87942	-1.71259
	-3.24378	-8.47908	1.94101	-1.71557
	-3.23039	-8.5191	2.01219	-1.71853
	-3.22153	-8.54214	2.09288	-1.72146
	-3.2167	-8.55194	2.18272	-1.72436
	-3.21535	-8.55295	2.28106	-1.72723
	-3.21691	-8.54823	2.38699	-1.73007
	-3.22081	-8.53925	2.49933	-1.73288
	-3.22646	-8.52675	2.61672	-1.73566
	-3.23324	-8.51128	2.73761	-1.73841
	-3.24055	-8.49327	2.86036	-1.74112
	-3.24781	-8.47305	2.98328	-1.7438
	-3.25449	-8.45084	3.10476	-1.74645
	-3.26016	-8.4267	3.22326	-1.74907
	-3.26448	-8.40052	3.33748	-1.75165
	-3.2672	-8.37209	3.44628	-1.75419
	-3.26821	-8.34104	3.5488	-1.7567
	-3.2675	-8.30694	3.64438	-1.75918
	-3.2652	-8.26922	3.73257	-1.76162
	-3.26158	-8.22725	3.81317	-1.76402
	-3.25704	-8.1803	3.88615	-1.76638
	-3.25206	-8.12798	3.95164	-1.76871
	-3.24722	-8.07125	4.00986	-1.771
	-3.24312	-8.01257	4.06113	-1.77325
	-3.24037	-7.95438	4.10574	-1.77546
	-3.23952	-7.89772	4.14396	-1.77763
	-3.24102	-7.84259	4.17597	-1.77977
	-3.24525	-7.7887	4.20183	-1.78186
	-3.25259	-7.7359	4.2215	-1.78391
	-3.26344	-7.68422	4.23491	-1.78592
	-3.27825	-7.6338	4.24195	-1.78789
	-3.29758	-7.58488	4.24253	-1.78982
	-3.32212	-7.53782	4.23661	-1.7917
	-3.35279	-7.49305	4.2241	-1.79355
	-3.39061	-7.4511	4.20498	-1.79535
	-3.4364	-7.41263	4.17923	-1.7971
	-3.49067	-7.37841	4.14689	-1.79882
	-3.55364	-7.34931	4.10808	-1.80049
	-3.62525	-7.3263	4.063	-1.80211
	-3.70496	-7.31041	4.01192	-1.80369
	-3.79168	-7.3029	3.9552	-1.80523
	-3.88386	-7.30558	3.8933	-1.80672
	-3.9797	-7.32045	3.82678	-1.80816
	-4.07728	-7.34856	3.75631	-1.80956
	-4.17467	-7.38945	3.68269	-1.81091
	-4.27004	-7.44182	3.60675	-1.81221
	-4.36176	-7.50422	3.52938	-1.81347
	-4.4485	-7.57532	3.45143	-1.81467
	-4.52918	-7.65394	3.37365	-1.81583
	-4.60307	-7.73899	3.29667	-1.81695
	-4.66968	-7.82946	3.22095	-1.81801
	-4.72879	-7.92441	3.14691	-1.81902
	-4.78035	-8.02294	3.0749	-1.81999
	-4.82449	-8.12418	3.0052	-1.82091
	-4.86147	-8.22726	2.93798	-1.82177
	-4.89165	-8.3313	2.87333	-1.82259
	-4.91546	-8.43548	2.81141	-1.82336
	-4.93343	-8.53911	2.75246	-1.82408
	-4.94605	-8.64179	2.69683	-1.82476
	-4.95385	-8.74399	2.64499	-1.82538
	-4.95727	-8.84728	2.59746	-1.82595
	-4.95672	-8.95324	2.55481	-1.82648
	-4.95255	-9.06222	2.5175	-1.82695
	-4.94501	-9.17323	2.48589	-1.82738
	-4.93433	-9.28486	2.46016	-1.82776
	-4.92062	-9.39588	2.44035	-1.82809
	-4.90395	-9.50548	2.42637	-1.82837
	-4.88427	-9.61316	2.41799	-1.82861
	-4.86149	-9.71852	2.4149	-1.82879
	-4.83544	-9.82124	2.41674	-1.82893
	-4.8059	-9.92088	2.42306	-1.82902
	-4.77267	-10.0168	2.4334	-1.82906
	-4.73549	-10.1081	2.44726	-1.82905
	-4.69416	-10.1934	2.4641	-1.829
	-4.64845	-10.2709	2.48338	-1.8289
	-4.59817	-10.3388	2.5045	-1.82875
	-4.54316	-10.3948	2.52684	-1.82856
	-4.48333	-10.4367	2.54977	-1.82832
	-4.41864	-10.4648	2.57264	-1.82804
	-4.3491	-10.4817	2.59483	-1.82771
	-4.27474	-10.491	2.61579	-1.82733
	-4.19566	-10.4951	2.63502	-1.82691
	-4.11197	-10.4948	2.65212	-1.82645
	-4.02381	-10.4905	2.6668	-1.82594
	-3.93133	-10.4825	2.67886	-1.82539
	-3.83481	-10.4709	2.68824	-1.82479
	-3.73465	-10.4562	2.69501	-1.82415
	-3.63145	-10.4386	2.69937	-1.82346
	-3.52595	-10.4184	2.70165	-1.82274
	-3.419	-10.396	2.70227	-1.82197
	-3.31156	-10.3715	2.70176	-1.82115
	-3.20467	-10.3454	2.70072	-1.8203
	-3.09938	-10.3177	2.69981	-1.8194
	-2.99669	-10.2887	2.6997	-1.81846
	-2.89749	-10.2583	2.7011	-1.81748
	-2.80251	-10.2264	2.70469	-1.81646
	-2.71239	-10.1933	2.71111	-1.8154
	-2.6277	-10.1603	2.72098	-1.8143
	-2.54895	-10.13	2.73486	-1.81315
	-2.47658	-10.105	2.75327	-1.81197
	-2.41097	-10.086	2.77668	-1.81075
	-2.3524	-10.0726	2.80553	-1.80948
	-2.30104	-10.064	2.84026	-1.80818
	-2.25692	-10.0591	2.88116	-1.80684
	-2.22001	-10.0572	2.9284	-1.80545
	-2.1901	-10.0575	2.9819	-1.80403
	-2.16691	-10.0592	3.04141	-1.80257
	-2.14998	-10.062	3.10646	-1.80107
	-2.13875	-10.0652	3.17638	-1.79954
	-2.13261	-10.0685	3.25036	-1.79796
	-2.13091	-10.0718	3.32739	-1.79635
	-2.13306	-10.0749	3.40639	-1.7947
	-2.13847	-10.0779	3.4862	-1.79301
	-2.14667	-10.081	3.56565	-1.79128
	-2.15723	-10.0845	3.64362	-1.78952
	-2.16984	-10.089	3.71906	-1.78772
	-2.18425	-10.0959	3.79107	-1.78589
	-2.20031	-10.1069	3.8589	-1.78401
	-2.21794	-10.1227	3.92199	-1.7821
	-2.23716	-10.1427	3.97998	-1.78015
	-2.25799	-10.1654	4.03267	-1.77817
	-2.28053	-10.1896	4.08001	-1.77615
	-2.30484	-10.2139	4.12206	-1.77409
	-2.33099	-10.2374	4.15889	-1.772
	-2.35904	-10.2593	4.19064	-1.76987
	-2.38905	-10.2792	4.21741	-1.7677
	-2.42123	-10.2966	4.23935	-1.7655
	-2.45592	-10.3113	4.25658	-1.76326
	-2.49359	-10.3233	4.26928	-1.76099
	-2.53485	-10.3326	4.27757	-1.75868
	-2.58055	-10.3396	4.28155	-1.75633
	-2.6317	-10.3445	4.28129	-1.75395
	-2.6893	-10.3478	4.27678	-1.75154
	-2.754	-10.3502	4.268	-1.74909
	-2.82601	-10.3533	4.2549	-1.7466
	-2.90514	-10.3597	4.23746	-1.74408
	-2.99091	-10.3719	4.21564	-1.74153
	-3.0825	-10.3912	4.18942	-1.73894
	-3.17872	-10.4176	4.1588	-1.73632
	-3.27811	-10.4501	4.12382	-1.73367
	-3.37907	-10.4877	4.08454	-1.73098
	-3.47999	-10.5295	4.04113	-1.72826
	-3.57933	-10.5745	3.99382	-1.72551
	-3.67572	-10.622	3.94299	-1.72272
	-3.76794	-10.6711	3.88907	-1.7199
	-3.85501	-10.7207	3.83247	-1.71705
	-3.93614	-10.7699	3.77355	-1.71417
	-4.01071	-10.8174	3.71264	-1.71125
	-4.07831	-10.8621	3.65004	-1.70831
	-4.13864	-10.9026	3.58604	-1.70533
	-4.19158	-10.9375	3.52081	-1.70232
	-4.23708	-10.9652	3.45445	-1.69928
	-4.27525	-10.9844	3.38699	-1.69621
	-4.30629	-10.9958	3.31853	-1.69311
	-4.33046	-11.0028	3.24942	-1.68999
	-4.34813	-11.0093	3.1802	-1.68683
	-4.35965	-11.0179	3.1116	-1.68364
	-4.3654	-11.0297	3.04436	-1.68043
	-4.3657	-11.0447	2.97922	-1.67718
	-4.36084	-11.0631	2.91676	-1.67391
	-4.35105	-11.0847	2.85746	-1.67061
	-4.3365	-11.1094	2.80168	-1.66729
	-4.31733	-11.1369	2.74968	-1.66394
	-4.29367	-11.1667	2.70164	-1.66056
	-4.26565	-11.1981	2.65765	-1.65715
	-4.23341	-11.2305	2.61775	-1.65372
	-4.19711	-11.2629	2.5819	-1.65026
	-4.15694	-11.2942	2.54998	-1.64678
	-4.1131	-11.3235	2.52182	-1.64328
	-4.0658	-11.3494	2.4972	-1.63975
	-4.0153	-11.3708	2.47582	-1.63619
	-3.96182	-11.3866	2.45738	-1.63261
	-3.9056	-11.3971	2.44155	-1.62901
	-3.84685	-11.4043	2.428	-1.62538
	-3.78571	-11.41	2.41644	-1.62173
	-3.72227	-11.4144	2.40661	-1.61806
	-3.65657	-11.4171	2.39831	-1.61437
	-3.58855	-11.4171	2.39138	-1.61065
	-3.51809	-11.3998	2.38572	-1.60691
	-3.44499	-11.3793	2.38128	-1.60315
	-3.369	-11.3555	2.37807	-1.59936
	-3.28985	-11.3288	2.3761	-1.59556
	-3.20732	-11.2992	2.37543	-1.59173
	-3.12135	-11.2673	2.37612	-1.58788
	-3.03206	-11.2336	2.37827	-1.58402
	-2.93973	-11.1986	2.382	-1.58013
	-2.84482	-11.163	2.38746	-1.57622
	-2.74793	-11.1273	2.39483	-1.57229
	-2.64981	-11.0921	2.40433	-1.56834
	-2.55128	-11.0581	2.41619	-1.56437
	-2.45321	-11.0258	2.43064	-1.56038
	-2.35649	-10.9965	2.44792	-1.55637
	-2.26206	-10.9712	2.46822	-1.55234
	-2.1708	-10.9504	2.49176	-1.5483
	-2.08357	-10.9335	2.51876	-1.54423
	-2.00117	-10.9195	2.54948	-1.54014
	-1.92438	-10.9073	2.5842	-1.53603
	-1.8539	-10.8963	2.6233	-1.53191
	-1.7904	-10.886	2.66718	-1.52776
	-1.73444	-10.8759	2.71623	-1.5236
	-1.68649	-10.866	2.77081	-1.51942
	-1.64681	-10.856	2.83115	-1.51521
	-1.61549	-10.8461	2.89733	-1.51099
	-1.59232	-10.8364	2.96924	-1.50676
	-1.57691	-10.8269	3.04652	-1.5025
	-1.56869	-10.818	3.12855	-1.49823
	-1.56694	-10.8099	3.21447	-1.49393
	-1.57088	-10.8027	3.30324	-1.48963
	-1.5797	-10.797	3.39377	-1.4853
	-1.59265	-10.7933	3.48486	-1.48096
	-1.60899	-10.7924	3.57533	-1.4766
	-1.6281	-10.7951	3.664	-1.47223
	-1.64942	-10.8013	3.74975	-1.46784
	-1.6725	-10.8105	3.83151	-1.46344
	-1.69702	-10.822	3.90831	-1.45902
	-1.72273	-10.8351	3.9793	-1.45459
	-1.74949	-10.849	4.04376	-1.45014
	-1.77719	-10.8633	4.10118	-1.44568
	-1.80582	-10.8774	4.15118	-1.44121
	-1.83535	-10.8909	4.19356	-1.43672
	-1.86579	-10.9033	4.22824	-1.43222
	-1.89718	-10.9143	4.25526	-1.42771
	-1.92971	-10.9239	4.27474	-1.42318
	-1.96373	-10.9319	4.2869	-1.41865
	-1.9997	-10.9384	4.29199	-1.4141
	-2.03825	-10.9438	4.2903	-1.40954
	-2.08026	-10.9483	4.28212	-1.40497
	-2.12671	-10.9526	4.26775	-1.4004
	-2.1786	-10.9546	4.24751	-1.39581
	-2.23673	-10.9565	4.2217	-1.39121
	-2.30171	-10.9583	4.19067	-1.38661
	-2.37387	-10.9601	4.15474	-1.382
	-2.45316	-10.9617	4.11425	-1.37738
	-2.53911	-10.9633	4.06952	-1.37276
	-2.63083	-10.9647	4.02088	-1.36813
	-2.72714	-10.9661	3.96863	-1.36349
	-2.82659	-10.9674	3.91311	-1.35884
	-2.92762	-10.9686	3.85463	-1.35419
	-3.02862	-10.9697	3.79355	-1.34954
	-3.12805	-10.9707	3.7302	-1.34488
	-3.22448	-10.9717	3.66492	-1.34022
	-3.31665	-10.9725	3.59804	-1.33556
	-3.40349	-10.9733	3.52985	-1.33089
	-3.48414	-10.974	3.46063	-1.32622
	-3.55796	-10.9746	3.39064	-1.32155
	-3.62458	-10.9752	3.32009	-1.31687
	-3.68379	-10.9757	3.24912	-1.3122
	-3.7356	-10.976	3.17785	-1.30753
	-3.78017	-10.9764	3.10639	-1.30285
	-3.81779	-10.9766	3.03487	-1.29818
	-3.84886	-10.9768	2.9635	-1.2935
	-3.87386	-10.9769	2.89258	-1.28883
	-3.89326	-10.9769	2.82249	-1.28416
	-3.90758	-10.9769	2.75372	-1.27949
	-3.9173	-10.9768	2.68676	-1.27483
	-3.92284	-10.9766	2.62211	-1.27017
	-3.92455	-10.9764	2.56031	-1.26551
	-3.92267	-10.9761	2.50193	-1.26086
	-3.91737	-10.9757	2.44756	-1.25621
	-3.90877	-10.9753	2.39772	-1.25157
	-3.89692	-10.9748	2.35282	-1.24694
	-3.88181	-10.9742	2.31313	-1.24231
	-3.8634	-10.9736	2.27877	-1.23769
	-3.84163	-10.9729	2.24976	-1.23308
	-3.81639	-10.9722	2.226	-1.22847
	-3.78759	-10.9714	2.20727	-1.22388
	-3.7551	-10.9705	2.1933	-1.21929
	-3.71881	-10.9696	2.18372	-1.21471
	-3.67867	-10.9686	2.17809	-1.21014
	-3.63467	-10.9676	2.17593	-1.20558
	-3.58686	-10.9665	2.17671	-1.20104
	-3.53534	-10.9654	2.17986	-1.1965
	-3.48027	-10.9642	2.18477	-1.19197
	-3.42188	-10.9629	2.19085	-1.18746
	-3.36043	-10.9616	2.19752	-1.18295
	-3.29624	-10.9602	2.20422	-1.17846
	-3.2296	-10.9588	2.21045	-1.17398
	-3.16084	-10.9574	2.21578	-1.16951
	-3.0902	-10.9558	2.2198	-1.16506
	-3.01787	-10.9543	2.22218	-1.16062
	-2.94398	-10.9527	2.22262	-1.15619
	-2.86854	-10.951	2.22085	-1.15178
	-2.79153	-10.9493	2.21663	-1.14738
	-2.71293	-10.9475	2.20979	-1.14299
	-2.63279	-10.9457	2.20019	-1.13863
	-2.55132	-10.9438	2.18784	-1.13427
	-2.46887	-10.9419	2.17282	-1.12993
	-2.38595	-10.9399	2.15531	-1.12561
	-2.3032	-10.9379	2.13555	-1.12131
	-2.22132	-10.9359	2.11384	-1.11702
	-2.14098	-10.9337	2.09049	-1.11275
	-2.06276	-10.9316	2.06585	-1.10849
	-1.9871	-10.9294	2.04029	-1.10425
	-1.91436	-10.9272	2.01418	-1.10003
	-1.84479	-10.9249	1.98789	-1.09583
	-1.77862	-10.9226	1.96181	-1.09164
	-1.71605	-10.9202	1.93624	-1.08747
	-1.65726	-10.9178	1.91149	-1.08332
	-1.60239	-10.9153	1.88777	-1.07919
	-1.55157	-10.9128	1.86526	-1.07508
	-1.50491	-10.9103	1.84409	-1.07099
	-1.46251	-10.9077	1.82435	-1.06691
	-1.4244	-10.9051	1.80613	-1.06286
	-1.39059	-10.9024	1.7895	-1.05882
	-1.36096	-10.8997	1.77455	-1.05481
	-1.33534	-10.897	1.76136	-1.05081
	-1.31342	-10.8942	1.74999	-1.04684
	-1.29484	-10.8913	1.74055	-1.04288
	-1.27917	-10.8885	1.7331	-1.03895
	-1.26598	-10.8856	1.72772	-1.03504
	-1.25483	-10.8826	1.72445	-1.03115
	-1.24532	-10.8796	1.7233	-1.02728
	-1.2371	-10.8766	1.72427	-1.02343
	-1.22993	-10.8736	1.72731	-1.0196
	-1.22362	-10.8705	1.73235	-1.0158
	-1.21807	-10.8673	1.73927	-1.01202
	-1.21321	-10.8642	1.74792	-1.00826
	-1.20905	-10.861	1.75812	-1.00452
	-1.20565	-10.8577	1.76962	-1.00081
	-1.20313	-10.8544	1.78218	-0.997118
	-1.20164	-10.8511	1.79551	-0.993451
	-1.20138	-10.8478	1.80933	-0.989807
	-1.20252	-10.8444	1.82337	-0.986186
	-1.20524	-10.841	1.83736	-0.982588
	-1.20971	-10.8375	1.85108	-0.979014
	-1.21609	-10.834	1.86435	-0.975463
	-1.22456	-10.8305	1.87706	-0.971936
	-1.2354	-10.827	1.88917	-0.968432
	-1.24901	-10.8234	1.90068	-0.964951
	-1.26592	-10.8198	1.91163	-0.961494
	-1.28675	-10.8161	1.92209	-0.95806
	-1.31219	-10.8125	1.93211	-0.954649
	-1.34299	-10.8088	1.94175	-0.951262
	-1.37995	-10.805	1.95106	-0.947898
	-1.4238	-10.8013	1.96013	-0.944557
	-1.47495	-10.7975	1.96903	-0.941239
	-1.53339	-10.7936	1.97787	-0.937944
	-1.59864	-10.7898	1.98678	-0.934672
	-1.66988	-10.7859	1.99594	-0.931423
	-1.74604	-10.782	2.00555	-0.928196
	-1.82584	-10.778	2.01583	-0.924991
	-1.90788	-10.774	2.02704	-0.921808
	-1.99065	-10.77	2.03936	-0.918646
	-2.07262	-10.766	2.05298	-0.915506
	-2.1524	-10.762	2.06804	-0.912386
	-2.22872	-10.7579	2.08463	-0.909287
	-2.30049	-10.7538	2.1028	-0.906209
	-2.36683	-10.7496	2.12254	-0.90315
	-2.42708	-10.7455	2.14379	-0.900111
	-2.48077	-10.7413	2.16647	-0.897091
	-2.5276	-10.7371	2.19042	-0.89409
	-2.5675	-10.7328	2.21551	-0.891108
	-2.60053	-10.7285	2.24156	-0.888145
	-2.62696	-10.7243	2.26842	-0.8852
	-2.64717	-10.7199	2.29593	-0.882272
	-2.66162	-10.7156	2.32396	-0.879364
	-2.67086	-10.7112	2.35238	-0.876473
	-2.67545	-10.7068	2.38109	-0.8736
	-2.67598	-10.7024	2.40997	-0.870745
	-2.67304	-10.698	2.43892	-0.867907
	-2.66718	-10.6935	2.46781	-0.865087
	-2.6589	-10.689	2.49654	-0.862284
	-2.64869	-10.6845	2.52502	-0.859498
	-2.63693	-10.6799	2.55315	-0.856729
	-2.62398	-10.6754	2.5808	-0.853977
	-2.61008	-10.6708	2.60787	-0.851241
	-2.59539	-10.6661	2.6342	-0.848522
	-2.58001	-10.6615	2.65966	-0.845819
	-2.56398	-10.6568	2.68407	-0.843132
	-2.54729	-10.6522	2.70725	-0.840461
	-2.52987	-10.6474	2.72899	-0.837806
	-2.51165	-10.6427	2.74907	-0.835167
	-2.49251	-10.6379	2.76732	-0.832544
	-2.47234	-10.6332	2.78355	-0.829936
	-2.45104	-10.6284	2.7976	-0.827345
	-2.42855	-10.6235	2.80928	-0.824769
	-2.40479	-10.6187	2.81837	-0.822209
	-2.37972	-10.6138	2.82463	-0.819665
	-2.35327	-10.6089	2.82783	-0.817137
	-2.3254	-10.604	2.82776	-0.814624
	-2.29608	-10.599	2.82429	-0.812127
	-2.26528	-10.5941	2.81736	-0.809646
	-2.233	-10.5891	2.807	-0.80718
	-2.19922	-10.5841	2.79337	-0.804729
	-2.16402	-10.579	2.77672	-0.802294
	-2.12756	-10.574	2.75739	-0.799874
	-2.0901	-10.5689	2.7358	-0.797469
	-2.05198	-10.5638	2.71242	-0.795079
	-2.01361	-10.5587	2.68779	-0.792704
	-1.97549	-10.5536	2.66246	-0.790343
	-1.93812	-10.5484	2.63703	-0.787998
	-1.90195	-10.5433	2.6121	-0.785667
	-1.86737	-10.5381	2.58826	-0.783351
	-1.83465	-10.5329	2.56604	-0.781049
	-1.80401	-10.5277	2.54499	-0.778762
	-1.77556	-10.5224	2.5272	-0.77649
	-1.74937	-10.5172	2.51291	-0.774231
	-1.72543	-10.5119	2.50227	-0.771987
	-1.70368	-10.5066	2.49535	-0.769757
	-1.68404	-10.5013	2.4921	-0.76754
	-1.66637	-10.496	2.4924	-0.765337
	-1.6505	-10.4907	2.49602	-0.763148
	-1.63623	-10.4853	2.50267	-0.760972
	-1.62334	-10.48	2.51198	-0.758809
	-1.61159	-10.4746	2.52357	-0.756659
	-1.60076	-10.4692	2.53701	-0.754523
	-1.59064	-10.4638	2.5519	-0.752399
	-1.581	-10.4584	2.56785	-0.750288
	-1.57162	-10.4529	2.58448	-0.74819
	-1.56231	-10.4475	2.6014	-0.746104
	-1.55293	-10.442	2.61825	-0.74403
	-1.54343	-10.4365	2.63466	-0.74197
	-1.53382	-10.431	2.65023	-0.739921
	-1.52417	-10.4255	2.66462	-0.737884
	-1.51463	-10.42	2.67749	-0.735859
	-1.50536	-10.4145	2.68854	-0.733846
	-1.49654	-10.4089	2.69754	-0.731843
	-1.48835	-10.4034	2.70433	-0.729852
	-1.48097	-10.3978	2.70881	-0.727871
	-1.47456	-10.3922	2.711	-0.725901
	-1.46924	-10.3866	2.71097	-0.723941
	-1.46513	-10.381	2.70886	-0.721991
	-1.46228	-10.3754	2.70483	-0.72005
	-1.46073	-10.3697	2.69905	-0.718119
	-1.46047	-10.3641	2.69172	-0.716196
	-1.46148	-10.3584	2.68302	-0.714282
	-1.46369	-10.3527	2.67316	-0.712377
	-1.46709	-10.347	2.66233	-0.71048
	-1.47174	-10.3413	2.6507	-0.70859
	-1.47788	-10.3356	2.63843	-0.706708
	-1.48596	-10.3298	2.62567	-0.704834
	-1.49658	-10.3241	2.61255	-0.702968
	-1.51041	-10.3183	2.59921	-0.701109
	-1.52813	-10.3125	2.58577	-0.699257
	-1.55037	-10.3067	2.57235	-0.697411
	-1.57771	-10.3009	2.55909	-0.695573
	-1.61049	-10.295	2.54609	-0.69374
	-1.64878	-10.2892	2.53348	-0.691914
	-1.69237	-10.2833	2.52137	-0.690093
	-1.74076	-10.2774	2.50985	-0.688277
	-1.79327	-10.2715	2.49899	-0.686467
	-1.84899	-10.2656	2.48886	-0.684661
	-1.90693	-10.2597	2.47949	-0.68286
	-1.96603	-10.2537	2.4709	-0.681063
	-2.0253	-10.2478	2.47027	-0.67927
	-2.08383	-10.2418	2.46963	-0.677481
	-2.14086	-10.2358	2.46898	-0.675694
	-2.19573	-10.2297	2.46833	-0.67391
	-2.24794	-10.2237	2.46767	-0.67213
	-2.29712	-10.2177	2.46701	-0.670352
	-2.34306	-10.2116	2.46634	-0.668576
	-2.38565	-10.2055	2.46566	-0.666803
	-2.42492	-10.1994	2.46499	-0.665032
	-2.46096	-10.1932	2.4643	-0.663263
	-2.4939	-10.1871	2.46362	-0.661496
	-2.52388	-10.1809	2.46292	-0.65973
	-2.55105	-10.1747	2.46223	-0.657966
	-2.57554	-10.1685	2.46152	-0.656203
	-2.59746	-10.1623	2.46082	-0.65444
	-2.61694	-10.156	2.46011	-0.652679
	-2.63408	-10.1498	2.45939	-0.650918
	-2.64898	-10.1435	2.45868	-0.649158
	-2.66178	-10.1372	2.45796	-0.647398
	-2.6726	-10.1308	2.45723	-0.645638
	-2.68155	-10.1245	2.4565	-0.643878
	-2.68872	-10.1181	2.45577	-0.642119
	-2.69414	-10.1117	2.45503	-0.640358
	-2.69782	-10.1053	2.4543	-0.638598
	-2.6997	-10.0989	2.45355	-0.636837
	-2.69974	-10.0924	2.45281	-0.635075
	-2.69788	-10.086	2.45206	-0.633312
	-2.69409	-10.0795	2.45131	-0.631548
	-2.68835	-10.073	2.45056	-0.629783
	-2.68069	-10.0664	2.44981	-0.628016
	-2.67116	-10.0599	2.44905	-0.626247
	-2.65984	-10.0533	2.44829	-0.624476
	-2.64683	-10.0467	2.44754	-0.622702
	-2.63224	-10.04	2.44677	-0.620925
	-2.6162	-10.0334	2.44601	-0.619146
	-2.59885	-10.0267	2.44525	-0.617363
	-2.5804	-10.02	2.44448	-0.615576
	-2.56108	-10.0133	2.44372	-0.613786
	-2.54117	-10.0066	2.44295	-0.611991
	-2.52097	-9.99979	2.44219	-0.610192
	-2.50071	-9.993	2.44142	-0.608388
	-2.4806	-9.98618	2.44065	-0.60658
	-2.46077	-9.97935	2.43988	-0.604766
	-2.44131	-9.97249	2.43911	-0.602947
	-2.42228	-9.9656	2.43835	-0.601122
	-2.40369	-9.95869	2.43758	-0.59929
	-2.38552	-9.95176	2.43681	-0.597451
	-2.36772	-9.9448	2.43605	-0.595606
	-2.35016	-9.93782	2.43528	-0.593752
	-2.33272	-9.93081	2.43452	-0.59189
	-2.31527	-9.92378	2.43376	-0.590019
	-2.29774	-9.91672	2.433	-0.58814
	-2.28008	-9.90964	2.43224	-0.58625
	-2.2623	-9.90253	2.43148	-0.584351
	-2.24445	-9.89539	2.43072	-0.582441
	-2.22663	-9.88823	2.42997	-0.58052
	-2.20241	-9.88105	2.42922	-0.578587
	-2.17915	-9.87383	2.42847	-0.576644
	-2.15703	-9.8666	2.42772	-0.574688
	-2.13617	-9.85933	2.42698	-0.572719
	-2.11664	-9.85204	2.42624	-0.570739
	-2.09844	-9.84472	2.4255	-0.568746
	-2.08147	-9.83738	2.42477	-0.56674
	-2.06558	-9.83001	2.42403	-0.564721
	-2.05057	-9.82261	2.4233	-0.56269
	-2.03619	-9.81518	2.42258	-0.560645
	-2.02217	-9.80773	2.42186	-0.558586
	-2.00823	-9.80025	2.42114	-0.556514
	-1.99409	-9.79274	2.42042	-0.554428
	-1.97949	-9.78521	2.41971	-0.552328
	-1.96424	-9.77764	2.419	-0.550214
	-1.94816	-9.77006	2.4183	-0.548086
	-1.93119	-9.76244	2.41759	-0.545943
	-1.91332	-9.75479	2.4169	-0.543785
	-1.8946	-9.74712	2.4162	-0.541613
	-1.87518	-9.73942	2.41551	-0.539425
	-1.85525	-9.73169	2.41483	-0.537223
	-1.83505	-9.72393	2.41415	-0.535006
	-1.81484	-9.71615	2.41347	-0.532773
	-1.79494	-9.70833	2.4128	-0.530526
	-1.77564	-9.70049	2.41214	-0.528263
	-1.75728	-9.69262	2.41147	-0.525986
	-1.74016	-9.68472	2.41082	-0.523694
	-1.72459	-9.67679	2.41017	-0.521388
	-1.71084	-9.66883	2.40952	-0.519067
	-1.69913	-9.66085	2.40888	-0.516731
	-1.68961	-9.65283	2.40825	-0.514381
	-1.68239	-9.64479	2.40762	-0.512016
	-1.67748	-9.63672	2.407	-0.509637
	-1.67483	-9.62862	2.40638	-0.507244
	-1.67432	-9.6205	2.40577	-0.504836
	-1.67576	-9.61235	2.40517	-0.502413
	-1.67893	-9.60417	2.40457	-0.499977
	-1.6836	-9.59596	2.40399	-0.497526
	-1.6895	-9.58773	2.40341	-0.495061
	-1.69636	-9.57948	2.40283	-0.492582
	-1.70394	-9.57119	2.40227	-0.490089
	-1.71198	-9.56288	2.40171	-0.487583
	-1.72024	-9.55455	2.40116	-0.485063
	-1.72852	-9.54619	2.40063	-0.482529
	-1.73664	-9.5378	2.40009	-0.479982
	-1.74446	-9.52939	2.39957	-0.477422
	-1.75187	-9.52095	2.39906	-0.474849
	-1.75879	-9.51249	2.39856	-0.472263
	-1.76517	-9.50401	2.39807	-0.469663
	-1.77095	-9.4955	2.39759	-0.467051
	-1.76863	-9.48697	2.39711	-0.464426
	-1.76632	-9.47842	2.39665	-0.461788
	-1.764	-9.46984	2.3962	-0.459138
	-1.76168	-9.46124	2.39576	-0.456476
	-1.75936	-9.45262	2.39533	-0.453801
	-1.75704	-9.44398	2.39492	-0.451115
	-1.75472	-9.43531	2.39451	-0.448416
	-1.75239	-9.42663	2.39412	-0.445707
	-1.75006	-9.41792	2.39374	-0.442986
	-1.74773	-9.40919	2.39337	-0.440254
	-1.7454	-9.40044	2.39302	-0.437512
	-1.74306	-9.39167	2.39268	-0.43476
	-1.74073	-9.38288	2.39235	-0.431997
	-1.73839	-9.37407	2.39203	-0.429225
	-1.73605	-9.36524	2.39173	-0.426443
	-1.7337	-9.35639	2.39144	-0.423651
	-1.73136	-9.34752	2.39117	-0.42085
	-1.72901	-9.33864	2.3909	-0.418041
	-1.72666	-9.32973	2.39066	-0.415222
	-1.7243	-9.32081	2.39043	-0.412394
	-1.72195	-9.31186	2.39021	-0.409558
	-1.71959	-9.3029	2.39001	-0.406714
	-1.71722	-9.29392	2.38982	-0.403861
	-1.71486	-9.28493	2.38965	-0.401001
	-1.71249	-9.27591	2.3895	-0.398132
	-1.71011	-9.26688	2.38936	-0.395257
	-1.70773	-9.25783	2.38923	-0.392374
	-1.70535	-9.24877	2.38913	-0.389484
	-1.70297	-9.23968	2.38904	-0.386587
	-1.70058	-9.23058	2.38896	-0.383685
	-1.69818	-9.22147	2.38891	-0.380776
	-1.69578	-9.21233	2.38887	-0.377863
	-1.69338	-9.20318	2.38885	-0.374944
	-1.69097	-9.19402	2.38885	-0.372021
	-1.68855	-9.18484	2.38886	-0.369094
	-1.68613	-9.17564	2.3889	-0.366163
	-1.68371	-9.16643	2.38895	-0.363229
	-1.68128	-9.1572	2.38902	-0.360291
	-1.67884	-9.14796	2.38911	-0.357351
	-1.6764	-9.1387	2.38922	-0.354408
	-1.67395	-9.12943	2.38935	-0.351464
	-1.67149	-9.12014	2.3895	-0.348517
	-1.66902	-9.11084	2.38968	-0.345569
	-1.66655	-9.10153	2.38987	-0.342621
	-1.66407	-9.0922	2.39008	-0.339671
	-1.66158	-9.08286	2.39032	-0.336721
	-1.65909	-9.0735	2.39057	-0.333771
	-1.65658	-9.06413	2.39085	-0.330821
	-1.65407	-9.05475	2.39115	-0.327871
	-1.65155	-9.04535	2.39147	-0.324923
	-1.64902	-9.03594	2.39182	-0.321977
	-1.64648	-9.02651	2.39219	-0.319033
	-1.64393	-9.01707	2.39258	-0.316091
	-1.64137	-9.00762	2.393	-0.313152
	-1.6388	-8.99816	2.39344	-0.310216
	-1.63622	-8.98868	2.3939	-0.307283
	-1.63362	-8.97919	2.39439	-0.304354
	-1.63102	-8.96969	2.3949	-0.301428
	-1.62841	-8.96018	2.39543	-0.298507
	-1.62579	-8.95065	2.396	-0.29559
	-1.62315	-8.94112	2.39658	-0.292678
	-1.6205	-8.93157	2.39719	-0.289771
	-1.61784	-8.92201	2.39783	-0.286869
	-1.61517	-8.91244	2.39849	-0.283973
	-1.61249	-8.90286	2.39918	-0.281083
	-1.60979	-8.89328	2.39989	-0.278198
	-1.60708	-8.88368	2.40063	-0.27532
	-1.60436	-8.87407	2.4014	-0.272448
	-1.60163	-8.86445	2.40219	-0.269583
	-1.59888	-8.85483	2.40301	-0.266725
	-1.59612	-8.84519	2.40385	-0.263874
	-1.59335	-8.83555	2.40472	-0.261031
	-1.59056	-8.8259	2.40562	-0.258194
	-1.58776	-8.81624	2.40655	-0.255365
	-1.58495	-8.80657	2.4075	-0.252543
	-1.58212	-8.7969	2.40848	-0.249729
	-1.57928	-8.78722	2.40949	-0.246922
	-1.57642	-8.77754	2.41052	-0.244122
	-1.57355	-8.76785	2.41158	-0.24133
	-1.57067	-8.75815	2.41267	-0.238545
	-1.56777	-8.74845	2.41379	-0.235767
	-1.56486	-8.73874	2.41493	-0.232996
	-1.56194	-8.72903	2.41611	-0.230233
	-1.559	-8.71932	2.41731	-0.227476
	-1.55604	-8.7096	2.41853	-0.224727
	-1.55308	-8.69988	2.41979	-0.221984
	-1.55009	-8.69016	2.42107	-0.219248
	-1.5471	-8.68043	2.42239	-0.216518
	-1.54409	-8.6707	2.42373	-0.213795
	-1.54106	-8.66097	2.4251	-0.211078
	-1.53802	-8.65124	2.42649	-0.208366
	-1.53497	-8.64151	2.42792	-0.205659
	-1.5319	-8.63177	2.42937	-0.202957
	-1.52881	-8.62204	2.43085	-0.200259
	-1.52571	-8.61231	2.43236	-0.197566
	-1.5226	-8.60257	2.4339	-0.194876
	-1.51947	-8.59284	2.43547	-0.192189
	-1.51633	-8.58311	2.43706	-0.189506
	-1.51317	-8.57338	2.43869	-0.186825
	-1.51	-8.56365	2.44034	-0.184146
	-1.50681	-8.55393	2.44202	-0.181469
	-1.50361	-8.5442	2.44372	-0.178793
	-1.5004	-8.53448	2.44546	-0.176119
	-1.49716	-8.52476	2.44722	-0.173446
	-1.49392	-8.51504	2.44901	-0.170773
	-1.49066	-8.50532	2.45082	-0.168101
	-1.48738	-8.49561	2.45267	-0.16543
	-1.48409	-8.4859	2.45454	-0.162759
	-1.48079	-8.47619	2.45643	-0.160088
	-1.47747	-8.46649	2.45835	-0.157417
	-1.47414	-8.45679	2.4603	-0.154746
	-1.47079	-8.44709	2.46227	-0.152075
	-1.46743	-8.4374	2.46427	-0.149403
	-1.46405	-8.42772	2.4663	-0.14673
	-1.46066	-8.41803	2.46834	-0.144056
	-1.45725	-8.40835	2.47042	-0.141381
	-1.45384	-8.39868	2.47251	-0.138704
	-1.45041	-8.38901	2.47463	-0.136026
	-1.44696	-8.37935	2.47678	-0.133347
	-1.4435	-8.36968	2.47894	-0.130665
	-1.44003	-8.36003	2.48113	-0.127982
	-1.43655	-8.35038	2.48334	-0.125296
	-1.43305	-8.34073	2.48557	-0.122608
	-1.42954	-8.33109	2.48783	-0.119918
	-1.42602	-8.32145	2.4901	-0.117225
	-1.42249	-8.31182	2.4924	-0.114531
	-1.41894	-8.30219	2.49471	-0.111834
	-1.41539	-8.29257	2.49704	-0.109135
	-1.41182	-8.28295	2.4994	-0.106434
	-1.40824	-8.27333	2.50177	-0.10373
	-1.40465	-8.26373	2.50416	-0.101024
	-1.40105	-8.25412	2.50656	-0.0983147
	-1.39744	-8.24453	2.50899	-0.0956031
	-1.39382	-8.23494	2.51142	-0.0928887
	-1.39019	-8.22535	2.51388	-0.0901715
	-1.38656	-8.21578	2.51635	-0.0874514
	-1.38291	-8.20621	2.51884	-0.0847282
	-1.37925	-8.19664	2.52134	-0.0820018
	-1.37558	-8.18708	2.52385	-0.0792723
	-1.37191	-8.17753	2.52638	-0.0765395
	-1.36823	-8.16799	2.52891	-0.0738032
	-1.36453	-8.15845	2.53147	-0.0710635
	-1.36083	-8.14893	2.53403	-0.0683204
	-1.35713	-8.13941	2.5366	-0.0655738
	-1.35341	-8.12989	2.53918	-0.0628236
	-1.34969	-8.12039	2.54177	-0.0600696
	-1.34596	-8.11089	2.54437	-0.0573117
	-1.34222	-8.1014	2.54698	-0.0545496
	-1.33848	-8.09192	2.5496	-0.0517832
	-1.33472	-8.08245	2.55222	-0.0490124
	-1.33097	-8.07299	2.55485	-0.046237
	-1.3272	-8.06353	2.55748	-0.0434567
	-1.32343	-8.05408	2.56012	-0.0406716
	-1.31965	-8.04465	2.56276	-0.0378813
	-1.31587	-8.03522	2.56541	-0.0350858
	-1.31208	-8.0258	2.56806	-0.032285
	-1.30828	-8.01639	2.57071	-0.0294786
	-1.30448	-8.00699	2.57336	-0.0266667
	-1.30067	-7.99759	2.57602	-0.0238489
	-1.29685	-7.98821	2.57867	-0.0210253
	-1.29303	-7.97883	2.58132	-0.0181957
	-1.28921	-7.96946	2.58397	-0.0153601
	-1.28538	-7.9601	2.58662	-0.0125182
	-1.28154	-7.95075	2.58927	-0.0096698
	-1.2777	-7.94141	2.59191	-0.00681469
	-1.27385	-7.93207	2.59455	-0.00395255
	-1.27	-7.92275	2.59719	-0.00108313
	-1.26614	-7.91343	2.59982	0.00179385
	-1.26228	-7.90412	2.60244	0.00467863
	-1.25841	-7.89482	2.60506	0.00757145
	-1.25454	-7.88552	2.60767	0.0104726
	-1.25066	-7.87623	2.61027	0.0133822
	-1.24678	-7.86695	2.61286	0.0163006
	-1.24289	-7.85767	2.61545	0.0192279
	-1.239	-7.8484	2.61802	0.0221645
	-1.2351	-7.83914	2.62059	0.0251105
	-1.2312	-7.82988	2.62314	0.0280661
	-1.2273	-7.82063	2.62568	0.0310315
	-1.22339	-7.81139	2.62822	0.0340068
	-1.21947	-7.80214	2.63074	0.036992
	-1.21555	-7.79291	2.63324	0.0399869
	-1.21163	-7.78367	2.63574	0.0429916
	-1.20771	-7.77445	2.63822	0.0460061
	-1.20378	-7.76522	2.64068	0.0490304
	-1.19985	-7.756	2.64313	0.0520645
	-1.19591	-7.74678	2.64557	0.0551087
	-1.19197	-7.73757	2.64799	0.0581629
	-1.18802	-7.72836	2.65039	0.0612272
	-1.18408	-7.71915	2.65278	0.0643017
	-1.18013	-7.70994	2.65515	0.0673863
	-1.17617	-7.70074	2.65751	0.0704812
	-1.17222	-7.69154	2.65984	0.0735865
	-1.16826	-7.68234	2.66216	0.076702
	-1.16429	-7.67314	2.66446	0.079828
	-1.16033	-7.66394	2.66675	0.0829645
	-1.15636	-7.65474	2.66901	0.0861114
	-1.15239	-7.64554	2.67125	0.0892687
	-1.14842	-7.63634	2.67348	0.0924364
	-1.14444	-7.62714	2.67568	0.0956142
	-1.14046	-7.61794	2.67787	0.0988019
	-1.13648	-7.60874	2.68003	0.101999
	-1.1325	-7.59953	2.68217	0.105206
	-1.12851	-7.59032	2.68429	0.108423
	-1.12452	-7.58112	2.6864	0.111648
	-1.12054	-7.5719	2.68847	0.114883
	-1.11654	-7.56269	2.69053	0.118127
	-1.11255	-7.55347	2.69257	0.121379
	-1.10856	-7.54425	2.69458	0.12464
	-1.10456	-7.53503	2.69657	0.12791
	-1.10057	-7.52581	2.69854	0.131188
	-1.09657	-7.51658	2.70048	0.134474
	-1.09257	-7.50734	2.7024	0.137768
	-1.08857	-7.49811	2.7043	0.141069
	-1.08457	-7.48887	2.70617	0.144378
	-1.08057	-7.47962	2.70802	0.147694
	-1.07657	-7.47037	2.70985	0.151017
	-1.07257	-7.46112	2.71165	0.154347
	-1.06857	-7.45186	2.71342	0.157683
	-1.06456	-7.4426	2.71518	0.161026
	-1.06056	-7.43333	2.7169	0.164374
	-1.05656	-7.42405	2.71861	0.167728
	-1.05257	-7.41477	2.72028	0.171087
	-1.04857	-7.40549	2.72194	0.174452
	-1.04457	-7.3962	2.72357	0.177823
	-1.04058	-7.3869	2.72517	0.181198
	-1.03658	-7.3776	2.72675	0.184578
	-1.03259	-7.36829	2.7283	0.187964
	-1.0286	-7.35898	2.72983	0.191354
	-1.02461	-7.34966	2.73134	0.194748
	-1.02062	-7.34034	2.73281	0.198147
	-1.01664	-7.33101	2.73427	0.20155
	-1.01266	-7.32167	2.7357	0.204956
	-1.00868	-7.31233	2.73711	0.208367
	-1.00471	-7.30298	2.73849	0.211781
	-1.00074	-7.29363	2.73985	0.215199
	-0.996767	-7.28427	2.74118	0.21862
	-0.992802	-7.2749	2.74249	0.222044
	-0.98884	-7.26553	2.74378	0.225471
	-0.984883	-7.25615	2.74504	0.2289
	-0.98093	-7.24677	2.74629	0.232333
	-0.976981	-7.23738	2.7475	0.235768
	-0.973036	-7.22798	2.7487	0.239206
	-0.969095	-7.21858	2.74987	0.242646
	-0.965159	-7.20917	2.75102	0.246089
	-0.961228	-7.19975	2.75215	0.249534
	-0.957302	-7.19033	2.75326	0.252981
	-0.953381	-7.1809	2.75434	0.256431
	-0.949464	-7.17147	2.75541	0.259883
	-0.945553	-7.16203	2.75645	0.263336
	-0.941647	-7.15258	2.75748	0.266791
	-0.937747	-7.14313	2.75848	0.270248
	-0.933852	-7.13367	2.75946	0.273706
	-0.929962	-7.1242	2.76042	0.277164
	-0.926079	-7.11472	2.76137	0.280624
	-0.922201	-7.10524	2.76229	0.284083
	-0.918329	-7.09575	2.76319	0.287542
	-0.914463	-7.08626	2.76408	0.291
	-0.910603	-7.07676	2.76495	0.294457
	-0.90675	-7.06725	2.76579	0.297912
	-0.902903	-7.05773	2.76662	0.301365
	-0.899063	-7.04821	2.76743	0.304815
	-0.89523	-7.03868	2.76823	0.308261
	-0.891403	-7.02914	2.769	0.311704
	-0.887584	-7.0196	2.76976	0.315143
	-0.883772	-7.01004	2.7705	0.318577
	-0.879967	-7.00049	2.77123	0.322006
	-0.87617	-6.99092	2.77194	0.325429
	-0.872381	-6.98135	2.77263	0.328846
	-0.8686	-6.97177	2.7733	0.332256
	-0.864827	-6.96218	2.77396	0.335658
	-0.861062	-6.95258	2.7746	0.339053
	-0.857306	-6.94298	2.77523	0.342438
	-0.853559	-6.93337	2.77584	0.345815
	-0.849821	-6.92375	2.77643	0.349182
	-0.846092	-6.91413	2.77701	0.352537
	-0.842372	-6.90449	2.77758	0.355882
	-0.838662	-6.89485	2.77812	0.359214
	-0.834962	-6.88521	2.77866	0.362533
	-0.831272	-6.87555	2.77918	0.365839
	-0.827592	-6.86589	2.77969	0.369132
	-0.823922	-6.85622	2.78018	0.37241
	-0.820263	-6.84655	2.78066	0.375672
	-0.816614	-6.83687	2.78113	0.378919
	-0.812976	-6.82718	2.78159	0.38215
	-0.809349	-6.81749	2.78203	0.385365
	-0.805733	-6.80779	2.78246	0.388562
	-0.802129	-6.79809	2.78288	0.391741
	-0.798536	-6.78839	2.78329	0.394902
	-0.794954	-6.77868	2.78368	0.398044
	-0.791384	-6.76897	2.78407	0.401167
	-0.787826	-6.75925	2.78444	0.404271
	-0.784279	-6.74953	2.78481	0.407354
	-0.780745	-6.73981	2.78516	0.410416
	-0.777222	-6.73009	2.78551	0.413457
	-0.773712	-6.72037	2.78585	0.416476
	-0.770213	-6.71064	2.78618	0.419474
	-0.766727	-6.70091	2.7865	0.422449
	-0.763254	-6.69118	2.78681	0.425401
	-0.759792	-6.68145	2.78711	0.428329
	-0.756343	-6.67173	2.78741	0.431235
	-0.752906	-6.662	2.7877	0.434117
	-0.749481	-6.65227	2.78798	0.436974
	-0.746069	-6.64254	2.78826	0.439807
	-0.74267	-6.63282	2.78853	0.442616
	-0.739282	-6.62309	2.7888	0.445399
	-0.735907	-6.61337	2.78906	0.448157
	-0.732545	-6.60365	2.78932	0.450889
	-0.729195	-6.59394	2.78957	0.453595
	-0.725856	-6.58422	2.78982	0.456274
	-0.722531	-6.57451	2.79006	0.458927
	-0.719217	-6.56481	2.7903	0.461554
	-0.715916	-6.5551	2.79054	0.464153
	-0.712626	-6.5454	2.79077	0.466724
	-0.709349	-6.53571	2.79101	0.469268
	-0.706084	-6.52602	2.79124	0.471784
	-0.702831	-6.51633	2.79146	0.474273
	-0.699589	-6.50665	2.79169	0.476733
	-0.69636	-6.49697	2.79192	0.479166
	-0.693142	-6.4873	2.79214	0.481571
	-0.689937	-6.47763	2.79236	0.483948
	-0.686743	-6.46797	2.79259	0.486296
	-0.683561	-6.45831	2.79281	0.488617
	-0.68039	-6.44866	2.79303	0.490909
	-0.677231	-6.43901	2.79326	0.493173
	-0.674083	-6.42937	2.79348	0.495408
	-0.670947	-6.41973	2.79371	0.497615
	-0.667823	-6.4101	2.79393	0.499794
	-0.66471	-6.40047	2.79416	0.501945
	-0.661608	-6.39085	2.79439	0.504067
	-0.658517	-6.38123	2.79462	0.506159
	-0.655438	-6.37162	2.79486	0.508223
	-0.65237	-6.36201	2.79509	0.510258
	-0.649312	-6.3524	2.79533	0.512263
	-0.646266	-6.3428	2.79557	0.514239
	-0.643231	-6.33321	2.79582	0.516185
	-0.640207	-6.32361	2.79606	0.518102
	-0.637193	-6.31403	2.79632	0.519989
	-0.63419	-6.30444	2.79657	0.521846
	-0.631197	-6.29486	2.79683	0.523673
	-0.628215	-6.28529	2.79709	0.525471
	-0.625243	-6.27571	2.79735	0.527239
	-0.622282	-6.26614	2.79762	0.528977
	-0.619331	-6.25658	2.79789	0.530685
	-0.616389	-6.24701	2.79817	0.532364
	-0.613458	-6.23745	2.79845	0.534012
	-0.610536	-6.22789	2.79874	0.535632
	-0.607624	-6.21834	2.79902	0.537221
	-0.604721	-6.20878	2.79932	0.538781
	-0.601827	-6.19923	2.79961	0.540311
	-0.598943	-6.18967	2.79992	0.541811
	-0.596068	-6.18012	2.80022	0.543281
	-0.593201	-6.17057	2.80053	0.544722
	-0.590344	-6.16102	2.80084	0.546132
	-0.587495	-6.15146	2.80116	0.547512
	-0.584654	-6.14191	2.80148	0.548863
	-0.581822	-6.13236	2.8018	0.550184
	-0.578998	-6.12281	2.80213	0.551476
	-0.576182	-6.11325	2.80246	0.552739
	-0.573374	-6.1037	2.8028	0.553972
	-0.570574	-6.09414	2.80314	0.555176
	-0.567781	-6.08459	2.80348	0.556352
	-0.564997	-6.07503	2.80382	0.557499
	-0.562219	-6.06547	2.80417	0.558618
	-0.559449	-6.0559	2.80452	0.559708
	-0.556686	-6.04634	2.80487	0.560771
	-0.553931	-6.03677	2.80522	0.561807
	-0.551182	-6.0272	2.80557	0.562815
	-0.548441	-6.01763	2.80593	0.563796
	-0.545706	-6.00805	2.80629	0.564751
	-0.542978	-5.99847	2.80665	0.565679
	-0.540257	-5.98889	2.80701	0.566581
	-0.537542	-5.9793	2.80737	0.567457
	-0.534835	-5.96971	2.80773	0.568308
	-0.532133	-5.96011	2.80809	0.569135
	-0.529438	-5.95052	2.80845	0.569938
	-0.52675	-5.94091	2.80881	0.570717
	-0.524068	-5.9313	2.80917	0.571472
	-0.521392	-5.92169	2.80953	0.572205
	-0.518723	-5.91207	2.80988	0.572916
	-0.51606	-5.90245	2.81024	0.573606
	-0.513403	-5.89282	2.81059	0.574274
	-0.510752	-5.88318	2.81095	0.574922
	-0.508108	-5.87354	2.8113	0.57555
	-0.505469	-5.8639	2.81165	0.576159
	-0.502837	-5.85424	2.812	0.576749
	-0.500211	-5.84459	2.81234	0.577321
	-0.497591	-5.83492	2.81268	0.577876
	-0.494977	-5.82525	2.81303	0.578414
	-0.49237	-5.81558	2.81336	0.578936
	-0.489768	-5.8059	2.8137	0.579444
	-0.487173	-5.79621	2.81403	0.579936
	-0.484583	-5.78652	2.81436	0.580416
	-0.481999	-5.77682	2.81468	0.580883
	-0.479421	-5.76711	2.81501	0.581338
	-0.47685	-5.7574	2.81532	0.581783
	-0.474283	-5.74768	2.81564	0.582218
	-0.471723	-5.73795	2.81595	0.582644
	-0.469168	-5.72822	2.81626	0.583061
	-0.46662	-5.71848	2.81656	0.583472
	-0.464076	-5.70873	2.81686	0.583876
	-0.461538	-5.69898	2.81716	0.584274
	-0.459006	-5.68922	2.81745	0.584668
	-0.456479	-5.67945	2.81773	0.585058
	-0.453958	-5.66967	2.81802	0.585445
	-0.451442	-5.65989	2.81829	0.585829
	-0.448932	-5.6501	2.81857	0.586212
	-0.446427	-5.6403	2.81883	0.586594
	-0.443927	-5.6305	2.8191	0.586975
	-0.441433	-5.62068	2.81935	0.587356
	-0.438945	-5.61086	2.81961	0.587739
	-0.436462	-5.60103	2.81986	0.588123
	-0.433984	-5.5912	2.8201	0.58851
	-0.431512	-5.58135	2.82034	0.5889
	-0.429045	-5.5715	2.82057	0.589294
	-0.426585	-5.56164	2.8208	0.589693
	-0.42413	-5.55178	2.82102	0.590097
	-0.42168	-5.5419	2.82123	0.590507
	-0.419237	-5.53202	2.82144	0.590924
	-0.416799	-5.52213	2.82165	0.591349
	-0.414367	-5.51224	2.82185	0.591782
	-0.411942	-5.50233	2.82204	0.592224
	-0.409522	-5.49242	2.82223	0.592676
	-0.407109	-5.4825	2.82241	0.593138
	-0.404702	-5.47257	2.82258	0.59361
	-0.402302	-5.46264	2.82275	0.594094
	-0.399909	-5.4527	2.82292	0.594589
	-0.397522	-5.44275	2.82307	0.595097
	-0.395142	-5.4328	2.82323	0.595617
	-0.392769	-5.42283	2.82337	0.596151
	-0.390404	-5.41286	2.82351	0.596699
	-0.388046	-5.40289	2.82365	0.597261
	-0.385696	-5.39291	2.82377	0.597839
	-0.383353	-5.38293	2.8239	0.598432
	-0.381018	-5.37294	2.82401	0.599041
	-0.378692	-5.36294	2.82412	0.599667
	-0.376374	-5.35294	2.82423	0.600311
	-0.374064	-5.34294	2.82433	0.600972
	-0.371763	-5.33294	2.82442	0.601652
	-0.369471	-5.32293	2.82451	0.60235
	-0.367188	-5.31292	2.82459	0.603068
	-0.364914	-5.30291	2.82467	0.603806
	-0.362649	-5.29289	2.82474	0.604564
	-0.360394	-5.28288	2.8248	0.605342
	-0.358149	-5.27286	2.82486	0.606141
	-0.355914	-5.26285	2.82491	0.606961
	-0.353689	-5.25283	2.82496	0.607804
	-0.351474	-5.24282	2.825	0.608668
	-0.34927	-5.2328	2.82504	0.609555
	-0.347076	-5.22279	2.82507	0.610465
	-0.344893	-5.21278	2.82509	0.611398
	-0.342721	-5.20278	2.82511	0.612356
	-0.34056	-5.19278	2.82512	0.613337
	-0.338411	-5.18278	2.82513	0.614342
	-0.336273	-5.17278	2.82513	0.615373
	-0.334146	-5.1628	2.82513	0.616428
	-0.332031	-5.15281	2.82511	0.617508
	-0.329928	-5.14284	2.8251	0.618614
	-0.327836	-5.13287	2.82507	0.619745
	-0.325757	-5.1229	2.82504	0.620901
	-0.32369	-5.11295	2.825	0.622084
	-0.321636	-5.103	2.82496	0.623293
	-0.319593	-5.09306	2.82491	0.624527
	-0.317564	-5.08313	2.82485	0.625788
	-0.315548	-5.07321	2.82478	0.627075
	-0.313544	-5.0633	2.82471	0.628389
	-0.311553	-5.0534	2.82463	0.629729
	-0.309576	-5.04351	2.82454	0.631097
	-0.307613	-5.03363	2.82445	0.632491
	-0.305662	-5.02377	2.82434	0.633914
	-0.303726	-5.01392	2.82423	0.635364
	-0.301804	-5.00408	2.82412	0.636841
	-0.299895	-4.99425	2.82399	0.638347
	-0.298001	-4.98444	2.82386	0.639881
	-0.296121	-4.97464	2.82372	0.641443
	-0.294255	-4.96486	2.82357	0.643033
	-0.292404	-4.9551	2.82341	0.644652
	-0.290568	-4.94535	2.82325	0.6463
	-0.288746	-4.93561	2.82308	0.647976
	-0.28694	-4.92589	2.8229	0.649681
	-0.285148	-4.91619	2.82271	0.651415
	-0.283372	-4.90651	2.82251	0.653177
	-0.281611	-4.89685	2.82231	0.654967
	-0.279865	-4.8872	2.82209	0.656786
	-0.278135	-4.87758	2.82187	0.658633
	-0.276421	-4.86797	2.82164	0.660509
	-0.274722	-4.85839	2.82141	0.662412
	-0.273039	-4.84882	2.82117	0.664344
[truncated: 1,753 more rows]

## Sheet: Fig2F
		TN				NT
		pre	MIRS	post		pre	MIRS	post
		4.48	7.503	4.6596		-1.14776	2.67023	-2.5602
		5.20571	6.90286	2.6745		-1.09112	0.9678	-0.114719
		4.90286	9.56682	2.99314		-0.669	1.194	-0.162
		4.55455	8.35401	4.98884		-0.253637	1.1642	-0.307988
		5.175	9.43098	5.82367		-1.11342	4.65833	-0.243561
		4.70857	7.3856	2.63514		-0.52428	3.9002	-0.01498

## Sheet: Fig2G
	8 deg/s NT			2 deg/s NT			0 deg/s			2 deg/s TN			8 deg/s TN
	Before	MIRS		Before	MIRS		Before	MIRS		Before	MIRS		Before	MIRS
	-1.14776	2.67023		-0.914751	1.83618		0.40678	0.955173		2.17058	3.36106		4.48	7.503
	-1.09112	0.9678		-0.63464	1.6186		0.453345	2.15947		1.70852	3.09101		5.20571	6.90286
	-0.669	1.194		0.114	1.339		0.0557979	4.32448		1.9557	4.81833		4.90286	9.56682
	-0.253637	1.1642		-0.342108	0.9348		0.158485	0.590143		2.33813	5.03831		4.55455	8.35401
	-1.11342	4.65833		-0.249833	3.465		0.0660277	3.69473		1.98926	7.24696		5.175	9.43098
	-0.52428	3.9002		-0.218429	4.22		0.566593	0.857316		2.42198	3.71097		4.70857	7.3856

## Sheet: Fig2H
Normalized velocity
	8 deg/s NT			2 deg/s NT			0 deg/s			2 deg/s TN			8 deg/s TN
	Before	MIRS		Before	MIRS		Before	MIRS		Before	MIRS		Before	MIRS
	-0.0844967	0.196578		-0.0673426	0.135177		0.10154	0.238429		0.164415	0.25459		0.345028	0.457513
	-0.389092	0.345116		-0.226312	0.57719		0.857465	4.08446		0.576009	1.0421		1.15706	2.25775
	-0.421787	0.752785		0.0718739	0.844204		0.0065313	0.506192		1.58079	3.89465		0.864879	5.72647
	-0.0674749	0.309711		-0.0910107	0.248684		0.0196532	0.0731815		0.322678	0.695321		0.460943	0.845467
	-0.186572	0.780581		-0.0418637	0.580618		0.00926315	0.518341		0.246681	0.89867		0.641734	1.1695
	-0.458958	3.41426		-0.13385	2.58595		0.133715	0.202325		0.485406	0.743741		0.660574	1.03614
