# Supplementary material for: Sensory input-dependent gain modulation of the optokinetic nystagmus by mid-infrared stimulation in pigeons
Source: eLife. 2023 Feb 28;12:e78729. doi: 10.7554/eLife.78729 (PMC9977280; doi:10.7554/eLife.78729)
Supplement: Figure 3—source data 1. [file elife-78729-fig3-data1.xlsx]

## Sheet: Fig3A
	Example-Preferred
	Before			MIRS				Timepoint(ms)	-300	-299	-298	-297	-296	-295	-294	-293	-292	-291	-290	-289	-288	-287	-286	-285	-284	-283	-282	-281	-280	-279	-278	-277	-276	-275	-274	-273	-272	-271	-270	-269	-268	-267	-266	-265	-264	-263	-262	-261	-260
	EOG(deg)	Spikes(V)		EOG(deg)	Spikes(V)			Firing rate (Hz)	45.2929	45.2489	45.1998	45.1457	45.0867	45.0227	44.9538	44.88	44.8015	44.7183	44.6303	44.5377	44.4405	44.3388	44.2325	44.1218	44.0066	43.8876	43.7641	43.6363	43.5042	43.3679	43.2273	43.0825	42.9335	42.7804	42.6231	42.4618	42.2964	42.1269	41.9534	41.7758	41.5942	41.4086	41.219	41.0254	40.8278	40.6262	40.4096	40.1897	39.9664
	-1.37218	0.414403		4.7201	0.418091				11.6588	11.6367	11.6145	11.592	11.5693	11.5465	11.5234	11.5002	11.4767	11.453	11.429	11.4049	11.3804	11.3557	11.3308	11.3055	11.2799	11.2541	11.2279	11.2013	11.1744	11.1471	11.1194	11.0913	11.0628	11.0338	11.0044	10.9744	10.944	10.913	10.8815	10.8494	10.8167	10.7834	10.7494	10.7148	10.6795	10.6436	10.6069	10.5694	10.5312
	-1.43292	0.414902		4.92086	0.390625				19.4032	19.4073	19.4111	19.4145	19.4176	19.4205	19.423	19.4252	19.4272	19.4288	19.4301	19.4311	19.4317	19.432	19.4319	19.4313	19.4303	19.4288	19.4269	19.4243	19.4212	19.4174	19.413	19.4078	19.4018	19.395	19.3873	19.3787	19.3691	19.3584	19.3467	19.3337	19.3196	19.3042	19.2874	19.2692	19.2496	19.2285	19.2059	19.1767	19.1461
	-1.49177	0.414902		5.10743	0.372314				19.2455	19.2569	19.263	19.2639	19.2594	19.2495	19.234	19.2129	19.186	19.1535	19.1151	19.071	19.021	18.9651	18.9033	18.8357	18.7623	18.683	18.5979	18.5071	18.4106	18.3084	18.2007	18.0875	17.969	17.8451	17.7161	17.5821	17.4431	17.2994	17.151	16.9981	16.8409	16.6795	16.5142	16.345	16.1722	15.996	15.8165	15.634	15.4486
	-1.5482	0.417892		5.27931	0.363159				20.3316	20.1514	19.9676	19.7802	19.5895	19.3954	19.1982	18.9979	18.7946	18.5885	18.3798	18.1685	17.9548	17.7389	17.5209	17.3009	17.0739	16.8456	16.6162	16.3857	16.1543	15.9222	15.6895	15.4564	15.2231	14.9896	14.7562	14.523	14.2902	14.0579	13.8262	13.5954	13.3655	13.1368	12.9094	12.6833	12.4589	12.2361	12.0151	11.7962	11.5793
	-1.60178	0.421381		5.43642	0.335693				26.8312	26.7726	26.7045	26.627	26.5421	26.4477	26.3439	26.2308	26.1086	25.9773	25.837	25.688	25.5305	25.3646	25.1905	25.0085	24.8188	24.6216	24.4173	24.206	23.988	23.7637	23.5333	23.2972	23.0557	22.809	22.5575	22.3015	22.0414	21.7776	21.5102	21.2398	20.9665	20.6909	20.4131	20.1336	19.8527	19.5707	19.2879	19.0047	18.7213
	-1.65208	0.41839		5.57903	0.283813				39.9408	39.9119	39.88	39.845	39.807	39.7659	39.7218	39.6747	39.6246	39.5715	39.5154	39.4563	39.3942	39.3291	39.261	39.1898	39.1156	39.0383	38.9579	38.8745	38.7879	38.6981	38.6052	38.5091	38.4098	38.3072	38.2014	38.0923	37.9799	37.8642	37.7314	37.5962	37.4583	37.3178	37.1747	37.0287	36.88	36.7285	36.5741	36.4168	36.2566
	-1.69878	0.4154		5.7077	0.3479				11.419	11.5405	11.6642	11.7899	11.9176	12.0476	12.1797	12.3141	12.4507	12.5897	12.7311	12.8749	13.0213	13.1701	13.3216	13.4758	13.6327	13.779	13.9273	14.0776	14.23	14.3844	14.541	14.6997	14.8606	15.0236	15.1888	15.3562	15.5259	15.6977	15.8719	16.0483	16.227	16.408	16.5913	16.7769	16.9648	17.155	17.3476	17.5424	17.7395
	-1.74163	0.410416		5.82316	0.375366				22.627	22.6516	22.6697	22.6813	22.6863	22.6847	22.6765	22.6617	22.6404	22.6126	22.5782	22.5375	22.4904	22.437	22.3774	22.3118	22.2402	22.1628	22.0796	21.9909	21.8968	21.7975	21.6931	21.5838	21.4697	21.3512	21.2283	21.1013	20.9704	20.8358	20.6977	20.5563	20.4119	20.2647	20.1149	19.9627	19.8084	19.6522	19.4944	19.335	19.1744
	-1.78043	0.409419		5.92626	0.39978				10.2784	10.3815	10.486	10.5917	10.6985	10.8064	10.9152	11.0249	11.1352	11.2462	11.3576	11.4694	11.5813	11.6934	11.8054	11.9172	12.0286	12.1396	12.2499	12.3593	12.4679	12.5753	12.6814	12.786	12.8891	12.9904	13.0898	13.187	13.2821	13.3747	13.4647	13.552	13.6364	13.7178	13.796	13.8709	13.9424	14.0102	14.0743	14.1345	14.1908
	-1.81505	0.409419		6.01785	0.418091				6.23253	6.09083	5.95241	5.81729	5.68545	5.55692	5.43167	5.30971	5.19102	5.07558	4.96338	4.8544	4.7486	4.64596	4.54645	4.45003	4.35666	4.26631	4.17893	4.09448	4.0129	3.93416	3.85819	3.78495	3.71439	3.64644	3.58106	3.51818	3.45775	3.3997	3.34399	3.29054	3.2393	3.19021	3.1432	3.09822	3.05521	3.0141	2.97484	2.93736	2.90161
	-1.8454	0.409419		6.09883	0.418091				16.6486	16.3836	16.1188	15.8487	15.5795	15.3112	15.0441	14.7782	14.5138	14.2509	13.9897	13.7304	13.4731	13.2179	12.9649	12.7144	12.4664	12.2211	11.9785	11.7389	11.5022	11.2687	11.0383	10.8113	10.5877	10.3676	10.151	9.93815	9.72898	9.52891	9.33236	9.1394	8.95009	8.7645	8.58268	8.40467	8.23051	8.06023	7.89385	7.73141	7.57291
	-1.87145	0.410416		6.17001	0.390625				26.8252	26.4472	26.0696	25.6928	25.3167	24.9415	24.5675	24.1947	23.8233	23.4535	23.0852	22.7188	22.3542	21.9917	21.6313	21.2732	20.9174	20.564	20.2132	19.8651	19.511	19.1603	18.8129	18.4691	18.1289	17.7922	17.4592	17.1299	16.8044	16.4827	16.1648	15.8508	15.5408	15.2347	14.9251	14.62	14.3195	14.0235	13.7321	13.4452	13.163
	-1.8932	0.410665		6.23196	0.3479				14.0563	13.9753	13.8954	13.8164	13.7385	13.6614	13.5853	13.5101	13.4357	13.3622	13.2894	13.2174	13.1461	13.0754	13.0054	12.9359	12.867	12.7985	12.7304	12.6627	12.5865	12.5111	12.4364	12.3623	12.2888	12.2158	12.1431	12.0708	11.9987	11.9268	11.8549	11.7831	11.7113	11.6394	11.5673	11.495	11.4224	11.3495	11.2762	11.2025	11.1284
	-1.91071	0.411662		6.28487	0.408936				30.4185	30.1546	29.8941	29.6371	29.3834	29.1329	28.8856	28.6413	28.3999	28.1613	27.9253	27.6919	27.4609	27.232	27.0053	26.7805	26.5575	26.3361	26.1162	25.8975	25.68	25.4695	25.2594	25.0497	24.8401	24.6304	24.4207	24.2107	24.0003	23.7894	23.5779	23.3656	23.1524	22.9383	22.7232	22.5068	22.2636	22.0206	21.7778	21.535	21.292
	-1.92405	0.415898		6.32852	0.476074				38.2831	38.2706	38.2516	38.2261	38.1942	38.1558	38.1108	38.0594	38.0014	37.9369	37.8658	37.7882	37.7041	37.6134	37.5162	37.4125	37.3022	37.1854	37.0622	36.9324	36.7963	36.6536	36.4995	36.3393	36.1731	36.0008	35.8226	35.6384	35.4483	35.2523	35.0505	34.8429	34.6295	34.4105	34.1859	33.9557	33.72	33.479	33.2326	32.981	32.7243
	-1.93336	0.4154		6.36236	0.402832				13.4176	13.3158	13.2108	13.1026	12.9913	12.8769	12.7596	12.6395	12.5167	12.3913	12.2635	12.1333	12.0008	11.8663	11.7298	11.5915	11.4515	11.31	11.167	11.0227	10.8773	10.731	10.5837	10.4358	10.2873	10.1388	9.98991	9.84089	9.69184	9.54291	9.39422	9.24591	9.09811	8.95094	8.80453	8.659	8.51447	8.37104	8.22884	8.08796	7.9485
	-1.93878	0.411662		6.38557	0.3479				35.5633	35.2611	34.9508	34.6324	34.3061	33.9643	33.6153	33.2595	32.8969	32.5278	32.1523	31.7706	31.383	30.9897	30.591	30.1871	29.7783	29.3649	28.9471	28.5253	28.0908	27.6535	27.2137	26.7715	26.3273	25.8814	25.4341	24.9858	24.5367	24.0872	23.6376	23.1882	22.7393	22.2913	21.8611	21.4314	21.0025	20.5748	20.1486	19.7243	19.3022
	-1.94049	0.41241		6.39719	0.393677				46.5626	46.5491	46.4943	46.4323	46.3629	46.2863	46.2026	46.1116	46.0136	45.9086	45.7966	45.6778	45.5522	45.42	45.2812	45.136	44.9845	44.8269	44.6632	44.4937	44.3184	44.1376	43.9514	43.76	43.5635	43.3603	43.1525	42.9402	42.7237	42.5031	42.2786	42.0503	41.8185	41.5833	41.3448	41.1032	40.8588	40.6116	40.3618	40.1096	39.8551
	-1.93869	0.41241		6.39626	0.39978				2.51509	2.51509	2.51509	2.51509	2.51509	2.51509	2.51509	2.51509	2.51509	2.51509	2.51509	2.51509	2.51509	2.51509	2.51509	2.51509	2.51509	2.51509	2.51509	2.51509	2.51509	2.51509	2.51509	2.51509	2.51509	2.51509	2.51509	2.51509	2.51509	2.51509	2.51509	2.51509	2.51509	2.51509	2.51509	2.51509	2.51509	2.51509	2.51509	2.51509	2.51509
	-1.93361	0.416646		6.38185	0.366211				17.7524	17.6399	17.5233	17.4024	17.2774	17.1482	17.015	16.8777	16.7363	16.5911	16.4419	16.289	16.1324	15.9721	15.8083	15.6411	15.4706	15.297	15.1203	14.9407	14.7583	14.5733	14.3858	14.1961	14.0041	13.8102	13.6145	13.4171	13.2182	13.018	12.8168	12.6145	12.4116	12.208	12.0041	11.7999	11.5957	11.3916	11.1878	10.9846	10.7819
	-1.92545	0.410167		6.35312	0.378418				25.2616	25.0834	24.9028	24.6922	24.481	24.2691	24.0563	23.8427	23.628	23.4123	23.1954	22.9773	22.758	22.5373	22.3153	22.0918	21.8857	21.6769	21.4656	21.2517	21.0354	20.8167	20.5956	20.3722	20.1467	19.919	19.6892	19.4574	19.2238	18.9884	18.7512	18.5125	18.2723	18.0306	17.7877	17.5436	17.2985	17.0524	16.8056	16.558	16.3099
	-1.91441	0.410167		6.30931	0.390625				2.71769	2.71769	2.71769	2.71769	2.71769	2.71769	2.71769	2.71769	2.71769	2.71769	2.71769	2.71769	2.71769	2.71769	2.71769	2.71769	2.71769	2.71769	2.71769	2.71769	2.71769	2.71769	2.71769	2.71769	2.71769	2.71769	2.71769	2.71769	2.71769	2.71769	2.71769	2.71769	2.71769	2.71769	2.71769	2.71769	2.71769	2.71769	2.71769	2.71769	2.71769
	-1.90063	0.406678		6.24982	0.387573				11.8707	11.8001	11.733	11.6693	11.609	11.5519	11.4981	11.4473	11.3995	11.3547	11.3127	11.2734	11.2369	11.1813	11.1295	11.0815	11.0371	10.9961	10.9584	10.9239	10.8925	10.864	10.8383	10.8153	10.7949	10.8086	10.8227	10.8373	10.8524	10.868	10.884	10.9006	10.9176	10.9352	10.9533	10.9718	10.9909	11.0105	11.0306	11.0512	11.0724
	-1.88418	0.404685		6.17431	0.378418				19.6464	19.4819	19.3183	19.1605	19.0033	18.8466	18.6905	18.5349	18.3799	18.2254	18.0715	17.918	17.765	17.6125	17.4604	17.3088	17.1576	17.0068	16.8563	16.7061	16.5563	16.4067	16.2574	16.1083	15.9594	15.8106	15.662	15.5136	15.3652	15.2168	15.0685	14.9202	14.7719	14.6236	14.4752	14.3268	14.1783	14.0297	13.8809	13.7321	13.5832
	-1.86508	0.406429		6.08268	0.317383				20.2127	20.1215	20.0279	19.9321	19.834	19.7337	19.6313	19.5268	19.4202	19.3117	19.2013	19.0889	18.9747	18.8587	18.741	18.6215	18.5004	18.3776	18.2533	18.1274	18	17.8711	17.7408	17.6091	17.476	17.3415	17.2058	17.0687	16.9305	16.791	16.6503	16.5085	16.3655	16.2215	16.0763	15.9302	15.783	15.6348	15.4857	15.3356	15.1847
	-1.84328	0.40618		5.97511	0.286865				13.6369	13.3689	13.1027	12.8386	12.5766	12.3171	12.0599	11.8054	11.5536	11.3046	11.0586	10.8157	10.576	10.3395	10.1064	9.87677	9.65069	9.42824	9.2095	8.99452	8.78338	8.57265	8.36607	8.16368	7.96551	7.77157	7.58189	7.39649	7.21536	7.03851	6.86594	6.69765	6.53363	6.37385	6.21831	6.06697	5.91982	5.77681	5.63791	5.50309	5.3723
	-1.81869	0.401944		5.85189	0.283813				1.72688	1.72688	1.72688	1.72688	1.72688	1.72688	1.72688	1.72688	1.72688	1.72688	1.72688	1.72688	1.72688	1.72688	1.72688	1.72688	1.72688	1.72688	1.72688	1.72688	1.72688	1.72688	1.72688	1.72688	1.72688	1.72688	1.72688	1.72688	1.72688	1.72688	1.72688	1.72688	1.72688	1.72688	1.72688	1.72688	1.72688	1.72688	1.72688	1.72688	1.72688
	-1.79122	0.398704		5.71344	0.302124				27.7241	27.8553	27.9775	28.0906	28.1943	28.2886	28.3734	28.4484	28.5136	28.5689	28.6141	28.6492	28.6742	28.689	28.6935	28.6878	28.6717	28.6454	28.6088	28.5619	28.5049	28.4376	28.3603	28.273	28.1758	28.0688	27.952	27.8257	27.69	27.545	27.3908	27.2278	27.056	26.8756	26.6868	26.4899	26.2851	26.0726	25.8527	25.6256	25.3915
	-1.7608	0.400947		5.56024	0.335693				6.96386	6.92809	6.89151	6.85413	6.81596	6.77701	6.73728	6.69679	6.65555	6.61356	6.57085	6.52742	6.4833	6.43849	6.39303	6.34691	6.30018	6.25284	6.20492	6.15645	6.10744	6.05792	6.00792	5.95747	5.90658	5.8553	5.80365	5.75166	5.69936	5.64678	5.59396	5.54092	5.48769	5.43432	5.38083	5.32725	5.27363	5.21999	5.16636	5.11279	5.0593
	-1.72738	0.401695		5.39278	0.338745				10.0428	9.82137	9.60366	9.38984	9.17987	8.9738	8.77166	8.57348	8.37929	8.18913	8.003	7.82092	7.64292	7.46898	7.29912	7.13333	6.97161	6.81394	6.66031	6.51071	6.36511	6.22348	6.0858	5.95203	5.82214	5.69609	5.57383	5.45532	5.34051	5.22935	5.12631	5.02654	4.92999	4.83661	4.74636	4.65919	4.57504	4.49386	4.4156	4.34019	4.26758
	-1.69093	0.400947		5.2116	0.360107				23.4309	22.9383	22.4481	21.9608	21.4766	20.9958	20.5188	20.0457	19.577	19.1129	18.6536	18.1994	17.7505	17.3072	16.8696	16.4381	16.0127	15.5937	15.1812	14.7755	14.3766	13.9846	13.5998	13.2037	12.8161	12.437	12.0664	11.7043	11.3507	11.0057	10.6692	10.3412	10.0216	9.71047	9.4077	9.11326	8.83168	8.55801	8.29218	8.03413	7.78377
	-1.65146	0.401196		5.01728	0.357056				8.78672	8.66943	8.55195	8.43436	8.31674	8.19915	8.08168	7.96439	7.84735	7.73064	7.61433	7.4985	7.3832	7.26852	7.15451	7.04125	6.92881	6.81723	6.7066	6.59696	6.48838	6.38091	6.27462	6.16954	6.06574	5.96326	5.86215	5.76244	5.6642	5.56744	5.47222	5.37856	5.28649	5.19605	5.10727	5.02016	4.93474	4.85105	4.76909	4.68888	4.61042
	-1.60907	0.401695		4.81052	0.32959				3.04784	3.0192	2.99162	2.96508	2.93956	2.91503	2.89147	2.86886	2.84717	2.82637	2.80644	2.78736	2.76911	2.75165	2.73496	2.71903	2.70382	2.68931	2.67548	2.6623	2.64975	2.63781	2.62646	2.61567	2.60542	2.5957	2.58647	2.57772	2.56944	2.56159	2.55417	2.54715	2.54052	2.53426	2.52834	2.52277	2.51751	2.51256	2.5079	2.50351	2.49938
	-1.56388	0.40319		4.59205	0.299072				4.28651	4.17393	4.0653	3.96055	3.85961	3.76242	3.66889	3.57896	3.49256	3.40959	3.32998	3.25364	3.1805	3.11047	3.04345	2.97938	2.91816	2.8597	2.80392	2.75073	2.70005	2.65179	2.60587	2.5622	2.52071	2.48131	2.44392	2.35224	2.26587	2.18455	2.10805	2.03611	1.9685	1.9685	1.9685	1.9685	1.9685	1.9685	1.9685	1.9685	1.9685
	-1.51614	0.400199		4.36272	0.259399				21.2839	21.2494	21.2111	21.1691	21.1232	21.0735	21.0198	20.9622	20.9006	20.835	20.7653	20.6914	20.6135	20.5314	20.4451	20.3547	20.26	20.1611	20.058	19.9506	19.839	19.7232	19.6032	19.479	19.3506	19.2181	19.0814	18.9407	18.796	18.6473	18.4947	18.3382	18.1779	18.014	17.8464	17.6752	17.5006	17.3226	17.1359	16.9464	16.7541
	-1.46612	0.403439		4.1236	0.213623				4.98375	4.88126	4.78169	4.68504	4.59127	4.50037	4.41228	4.327	4.24447	4.16467	4.08754	4.01305	3.93984	3.86926	3.80126	3.73578	3.67277	3.61217	3.55393	3.49799	3.44429	3.39278	3.3434	3.29609	3.25079	3.20744	3.16599	3.12637	3.08854	3.05242	3.01797	2.98512	2.95383	2.92404	2.89569	2.86873	2.84312	2.81878	2.79569	2.77378	2.75302
	-1.41414	0.398455		3.87623	0.213623				3.32985	3.28049	3.23257	3.18609	3.14102	3.09735	3.05506	3.01414	2.97456	2.93631	2.89937	2.8637	2.8293	2.79613	2.76417	2.73339	2.70378	2.6753	2.64793	2.62164	2.59641	2.5722	2.54899	2.52676	2.50547	2.4851	2.46561	2.447	2.42921	2.41224	2.39605	2.38061	2.36591	2.35191	2.33858	2.32591	2.31387	2.30244	2.29159	2.28129	2.27153
	-1.36056	0.394966		3.62271	0.186157				9.82604	9.8006	9.77544	9.76288	9.74972	9.73593	9.72151	9.70643	9.69067	9.67421	9.65704	9.63912	9.62044	9.60098	9.58071	9.55963	9.53771	9.51493	9.49127	9.46672	9.44125	9.41485	9.3875	9.35919	9.32989	9.2996	9.2683	9.23597	9.20261	9.1682	9.13273	9.09619	9.05857	9.01987	8.98008	8.93919	8.8972	8.8541	8.80991	8.7646	8.7182
	-1.30575	0.397707		3.36554	0.228882				2.33754	2.33754	2.33754	2.33754	2.33754	2.33754	2.33754	2.33754	2.33754	2.33754	2.33754	2.33754	2.33754	2.33754	2.33754	2.33754	2.33754	2.33754	2.33754	2.33754	2.33754	2.33754	2.33754	2.33754	2.33754	2.33754	2.33754	2.33754	2.33754	2.33754	2.33754	2.33754	2.33754	2.33754	2.33754	2.33754	2.33754	2.33754	2.33754	2.33754	2.33754
	-1.2501	0.399452		3.10744	0.20752				18.8979	18.7566	18.6127	18.4661	18.3168	18.1648	18.0101	17.8527	17.692	17.5288	17.3629	17.1944	17.0235	16.85	16.6741	16.4959	16.3153	16.1325	15.9475	15.7604	15.5713	15.3803	15.1875	14.9929	14.7967	14.5991	14.4	14.1997	13.9982	13.7957	13.5922	13.3881	13.1833	12.9779	12.7723	12.5664	12.3604	12.1544	11.9487	11.7433	11.5384
	-1.194	0.398704		2.851	0.20752				2.59686	2.59686	2.59686	2.59686	2.59686	2.59686	2.59686	2.59686	2.59686	2.59686	2.59686	2.59686	2.59686	2.59686	2.59686	2.59686	2.59686	2.59686	2.59686	2.59686	2.59686	2.59686	2.59686	2.59686	2.59686	2.59686	2.59686	2.59686	2.59686	2.59686	2.59686	2.59686	2.59686	2.59686	2.59686	2.59686	2.59686	2.59686	2.59686	2.59686	2.59686
	-1.13785	0.398704		2.59851	0.234985				11.4338	11.238	11.0442	10.8523	10.6626	10.4751	10.2899	10.107	9.92663	9.74876	9.57349	9.40088	9.231	9.0639	8.89964	8.73826	8.57983	8.42436	8.27191	8.12251	7.97617	7.83293	7.69282	7.55583	7.42199	7.2913	7.16377	7.0394	6.91817	6.8001	6.68515	6.57333	6.46461	6.35897	6.25639	6.15684	6.06111	5.96829	5.87836	5.79128	5.70701
	-1.0821	0.401196		2.35192	0.238037				8.51442	8.4947	8.47428	8.45314	8.43126	8.40864	8.38526	8.36112	8.33621	8.31051	8.28402	8.25674	8.22865	8.19975	8.17003	8.1395	8.10814	8.07596	8.04295	8.00912	7.97447	7.93899	7.90269	7.86559	7.82767	7.78895	7.74943	7.70913	7.66805	7.62621	7.58362	7.54029	7.49623	7.45147	7.40602	7.35989	7.31311	7.2657	7.21768	7.16907	7.11989
	-1.02719	0.406678		2.11288	0.262451				7.41392	7.3855	7.36068	7.33937	7.32151	7.30702	7.29586	7.28795	7.31284	7.33908	7.36673	7.39584	7.42647	7.45868	7.49253	7.52809	7.5654	7.60455	7.64559	7.68858	7.7336	7.7807	7.82995	7.88142	7.93518	7.99129	8.04982	8.11083	8.17439	8.24056	8.30942	8.38102	8.44305	8.50716	8.57338	8.64171	8.71218	8.78478	8.85953	8.93643	9.01548
	-0.97357	0.406927		1.88263	0.228882				15.2301	15.0772	14.9211	14.7621	14.6002	14.4357	14.2687	14.0993	13.9277	13.7541	13.5787	13.4015	13.2228	13.0427	12.8615	12.6792	12.4961	12.3122	12.1279	11.9432	11.7583	11.5733	11.3885	11.204	11.0175	10.8318	10.6469	10.4631	10.2804	10.099	9.91907	9.74067	9.56393	9.38897	9.2159	9.04484	8.87587	8.7091	8.54462	8.38251	8.22286
	-0.921692	0.406927		1.6619	0.253296				4.8042	4.69813	4.59588	4.49736	4.40252	4.31127	4.22353	4.13923	4.05828	3.98061	3.90613	3.83476	3.76642	3.69336	3.62363	3.55711	3.4937	3.43329	3.37577	3.32103	3.26898	3.21952	3.17255	3.12796	3.08566	3.04557	3.00759	2.97162	2.9376	2.90542	2.87502	2.8463	2.8192	2.79363	2.76953	2.74683	2.72546	2.70535	2.68644	2.66867	2.66867
	-0.87196	0.41216		1.45089	0.241089				21.5336	21.7151	21.869	22.031	22.2012	22.3795	22.5661	22.761	22.9641	23.1756	23.3954	23.6234	23.8596	24.104	24.3564	24.6169	24.8852	25.1612	25.4448	25.7358	26.0341	26.3393	26.6514	26.97	27.2948	27.6257	27.9622	28.304	28.6516	29.0038	29.3603	29.7205	30.0842	30.4508	30.8199	31.1911	31.5639	31.9378	32.3122	32.6867	33.0607
	-0.824734	0.416397		1.24948	0.271606				22.0519	21.9678	21.8834	21.7985	21.713	21.627	21.5403	21.4529	21.3648	21.2759	21.1862	21.0956	21.0041	20.9118	20.8321	20.7507	20.6675	20.5827	20.4963	20.4083	20.3187	20.2277	20.1353	20.0415	19.9464	19.85	19.7525	19.659	19.5648	19.47	19.3747	19.2789	19.1827	19.0863	18.9897	18.893	18.7964	18.6998	18.6036	18.5076	18.4121
	-0.780318	0.414154		1.05739	0.308228				26.5249	26.5293	26.5279	26.5206	26.5073	26.4878	26.462	26.4297	26.391	26.3456	26.2936	26.2348	26.1693	26.0969	26.0177	25.9316	25.8387	25.7389	25.6324	25.5191	25.3991	25.2726	25.1394	24.9999	24.8541	24.702	24.5439	24.38	24.2102	24.035	23.8543	23.6684	23.4776	23.2819	23.0818	22.8772	22.6686	22.4561	22.24	22.0205	21.7979
	-0.738966	0.410167		0.874359	0.320435				17.2858	17.0289	16.7727	16.5175	16.2634	16.0105	15.759	15.5089	15.2605	15.0139	14.7691	14.5264	14.2858	14.0531	13.8224	13.5939	13.3677	13.144	12.9227	12.7041	12.4883	12.2754	12.0654	11.8585	11.6547	11.4542	11.257	11.0632	10.8728	10.6859	10.5026	10.3229	10.1469	9.97456	9.80594	9.64108	9.47999	9.32269	9.16919	9.01948	8.87359
	-0.700879	0.407426		0.700164	0.305176				30.5635	30.5185	30.466	30.4058	30.3378	30.2621	30.1784	30.0868	29.9873	29.8798	29.7643	29.6408	29.5093	29.37	29.2227	29.0676	28.9048	28.7343	28.5563	28.3708	28.178	27.9781	27.7711	27.5573	27.3368	27.1099	26.8766	26.6373	26.3921	26.1412	25.885	25.6236	25.3573	25.0863	24.811	24.5315	24.2482	23.9614	23.6713	23.3781	23.0823
	-0.666209	0.413656		0.534706	0.231934				13.8289	13.5573	13.2889	13.024	12.7626	12.5051	12.2514	12.0017	11.7562	11.515	11.2782	11.0458	10.818	10.5949	10.3764	10.1628	9.95399	9.75005	9.55102	9.35693	9.16778	8.98359	8.80436	8.63008	8.46074	8.29632	8.13678	7.9821	7.83224	7.68713	7.54675	7.41103	7.2799	7.1533	7.03116	6.90881	6.79104	6.67777	6.5689	6.46432	6.36393
	-0.635059	0.414902		0.377995	0.219727				19.8182	19.5243	19.2299	18.9353	18.6407	18.3428	18.0457	17.7496	17.4548	17.1615	16.87	16.5805	16.2932	16.0083	15.726	15.4465	15.1701	14.8969	14.6271	14.3608	14.0982	13.8396	13.5849	13.3343	13.088	12.8461	12.6087	12.3758	12.1476	11.9242	11.7055	11.4917	11.2828	11.0789	10.8799	10.686	10.497	10.3131	10.1342	9.96036	9.79147
	-0.607485	0.417393		0.230168	0.259399				16.3138	16.4333	16.5613	16.6003	16.6423	16.6876	16.7361	16.7879	16.8432	16.902	16.9644	17.0305	17.1004	17.1741	17.2517	17.3332	17.4188	17.5085	17.6022	17.7002	17.8023	17.9087	18.0193	18.1341	18.2533	18.3767	18.5044	18.6363	18.7724	18.9127	19.0572	19.2057	19.3582	19.5147	19.6751	19.8392	20.007	20.1783	20.353	20.5311	20.7122
	-0.583494	0.417393		0.0915246	0.222778				41.456	41.3627	41.2687	41.1738	41.0778	40.9807	40.8822	40.7822	40.6642	40.5454	40.4256	40.3047	40.1824	40.0586	39.9331	39.8057	39.6763	39.5446	39.4107	39.2742	39.1351	39.0113	38.8835	38.7516	38.6156	38.4754	38.331	38.1822	38.0292	37.8718	37.71	37.5439	37.3734	37.1985	37.0191	36.8354	36.6473	36.4549	36.2582	36.0571	35.8519
	-0.563055	0.419636		-0.0374359	0.112915				16.7446	16.7803	16.8145	16.847	16.8779	16.9069	16.9341	16.9594	16.9825	17.0036	17.0225	17.0391	17.0533	17.0652	17.0745	17.0813	17.0855	17.087	17.0858	17.0819	17.0751	17.0654	17.0529	17.0374	17.0189	16.9975	16.973	16.9455	16.915	16.8814	16.8448	16.8051	16.7624	16.7166	16.6678	16.6161	16.5613	16.5037	16.4431	16.3797	16.3135
	-0.546111	0.423125		-0.155975	0.140381				28.9221	29.1277	29.3334	29.5391	29.745	29.951	30.1572	30.3636	30.5701	30.7769	30.9839	31.1912	31.3987	31.6065	31.8146	32.023	32.2316	32.4405	32.6497	32.8592	33.0689	33.2789	33.489	33.6882	33.8869	34.0849	34.2821	34.4786	34.6741	34.8686	35.062	35.2541	35.4448	35.6341	35.8217	36.0075	36.1913	36.3731	36.5525	36.7296	36.904
	-0.532581	0.423872		-0.26308	0.161743				14.4105	14.4235	14.435	14.4449	14.4532	14.46	14.4652	14.4688	14.471	14.4715	14.4706	14.4682	14.4643	14.4589	14.452	14.4437	14.434	14.423	14.4106	14.3968	14.3818	14.3655	14.348	14.3293	14.3094	14.2884	14.2663	14.2432	14.219	14.1939	14.1679	14.141	14.1133	14.0848	14.0555	14.0255	13.9948	13.9636	13.9317	13.8993	13.8665
	-0.522383	0.419636		-0.357474	0.177002				23.2931	23.3284	23.354	23.3698	23.3759	23.3721	23.3585	23.3351	23.3018	23.2588	23.2061	23.1438	23.0719	22.9906	22.9	22.8002	22.6915	22.5739	22.4476	22.3129	22.17	22.019	21.8603	21.694	21.5205	21.34	21.1527	20.9591	20.7593	20.5537	20.3425	20.1262	19.905	19.6792	19.4492	19.2153	18.9778	18.7371	18.4935	18.2473	17.9988
	-0.515438	0.420135		-0.437725	0.134277				32.5288	32.7416	32.9486	33.1492	33.3429	33.5291	33.7074	33.8773	34.0383	34.1899	34.3317	34.4632	34.6006	34.726	34.8389	34.939	35.0262	35.1	35.1603	35.2069	35.2395	35.2579	35.262	35.2517	35.2268	35.1872	35.1329	35.0639	34.9802	34.8817	34.7684	34.6406	34.4982	34.3414	34.1703	33.9851	33.7859	33.5731	33.3468	33.1072	32.8547
	-0.511675	0.423374		-0.502445	0.15564				16.5976	16.7899	16.9869	17.1885	17.3947	17.6055	17.8208	18.0406	18.2649	18.4935	18.7264	18.9636	19.2049	19.4477	19.6947	19.9455	20.2001	20.4583	20.72	20.985	21.2531	21.5241	21.7979	22.0898	22.3851	22.6835	22.9849	23.289	23.5958	23.9049	24.2163	24.5297	24.8449	25.1618	25.4801	25.7996	26.1201	26.4415	26.7634	27.0858	27.4084
	-0.511026	0.421879		-0.550468	0.17395				14.9101	14.8711	14.8346	14.8006	14.7691	14.7399	14.713	14.6885	14.6661	14.6459	14.6278	14.6118	14.5978	14.5857	14.5755	14.5671	14.5606	14.5557	14.5525	14.551	14.551	14.5526	14.5556	14.56	14.5602	14.5614	14.5635	14.5664	14.5701	14.5744	14.5794	14.585	14.591	14.5975	14.6044	14.6202	14.6356	14.6508	14.6655	14.6798	14.6937
	-0.513426	0.416895		-0.580928	0.152588				30.9629	30.7478	30.5312	30.3132	30.0936	29.8724	29.6496	29.425	29.1987	28.9705	28.7404	28.5083	28.2743	28.0382	27.8	27.5596	27.317	27.0722	26.8252	26.5759	26.3242	26.0702	25.8051	25.5382	25.2695	24.999	24.7266	24.4523	24.1762	23.8982	23.6185	23.337	23.0537	22.7688	22.4822	22.194	21.9044	21.6133	21.3209	21.0273	20.7325
	-0.518806	0.414902		-0.593252	0.170898				44.5445	44.7395	44.9372	45.1377	45.341	45.5469	45.7554	45.9664	46.1799	46.3957	46.6138	46.8341	47.0564	47.2807	47.5069	47.7348	47.9621	48.191	48.4214	48.6532	48.8862	49.1202	49.3552	49.5909	49.8176	50.0441	50.2703	50.4958	50.7204	50.9441	51.1664	51.3873	51.6064	51.8235	52.0385	52.2509	52.4607	52.6675	52.8712	53.0713	53.2678
	-0.527095	0.417144		-0.58712	0.22583				75.7759	75.9509	76.121	76.2858	76.4391	76.5875	76.7311	76.8698	77.0035	77.153	77.2987	77.4406	77.5788	77.7132	77.844	77.971	78.0944	78.2141	78.3302	78.4427	78.5516	78.6569	78.7467	78.8309	78.9097	78.9831	79.0509	79.1132	79.1699	79.2211	79.2667	79.3066	79.3408	79.3693	79.3921	79.409	79.4201	79.4253	79.4246	79.4179	79.4051
	-0.538218	0.418639		-0.56246	0.271606				74.4672	74.2293	73.9873	73.741	73.4945	73.2433	72.987	72.729	72.466	72.198	71.925	71.6468	71.3635	71.0751	70.7815	70.4828	70.1792	69.8705	69.557	69.2388	68.9219	68.6074	68.2887	67.9661	67.6398	67.3101	66.9773	66.6417	66.3036	65.9634	65.5752	65.1885	64.8036	64.4206	64.0399	63.6436	63.2622	62.8821	62.5035	62.1267	61.7522
	-0.552106	0.414902		-0.519466	0.259399				21.7022	21.6602	21.6202	21.582	21.5457	21.5111	21.4782	21.4468	21.4171	21.3888	21.3619	21.3364	21.3122	21.2892	21.2674	21.2467	21.2271	21.2085	21.1838	21.1596	21.1357	21.1123	21.1013	21.0899	21.0778	21.0652	21.0519	21.0379	21.0233	21.0079	20.9918	20.9749	20.9572	20.9386	20.9191	20.8987	20.8774	20.855	20.8316	20.8072	20.7816
	-0.568716	0.416148		-0.458588	0.234985				21.824	21.8059	21.7905	21.7777	21.7674	21.7595	21.754	21.7507	21.7494	21.7502	21.7528	21.7571	21.7631	21.7704	21.7791	21.789	21.7998	21.8115	21.8239	21.8368	21.85	21.8634	21.8768	21.89	21.9029	21.9152	21.9267	21.9374	21.9469	21.9609	21.9731	21.9834	21.9914	21.9972	22.0005	22.0012	21.9991	21.9941	21.986	21.9748	21.9601
	-0.58803	0.417643		-0.380468	0.268555				24.9995	24.9064	24.8156	24.7271	24.6477	24.5702	24.4945	24.4207	24.3487	24.2786	24.2103	24.1438	24.079	24.016	23.9545	23.8947	23.8363	23.7794	23.7239	23.6696	23.6164	23.5644	23.5133	23.4631	23.4137	23.3649	23.3166	23.2687	23.2212	23.1738	23.1264	23.079	23.0314	22.9835	22.9351	22.8862	22.8366	22.7861	22.7348	22.6825	22.629
	-0.610047	0.421879		-0.285839	0.344849				30.8707	30.932	30.9896	31.0437	31.0946	31.1147	31.1303	31.1417	31.149	31.1526	31.1525	31.1491	31.1425	31.1329	31.1206	31.1058	31.0888	31.0696	31.0487	31.026	31.002	30.9767	30.9504	30.9232	30.8953	30.867	30.8383	30.8094	30.7804	30.7516	30.7229	30.6945	30.6665	30.639	30.612	30.5856	30.5598	30.5347	30.5103	30.4865	30.4633
	-0.634767	0.425866		-0.175418	0.38147				34.9974	35.1352	35.2635	35.3821	35.4907	35.5891	35.677	35.7542	35.8205	35.8757	35.9197	35.9523	35.9733	35.9826	35.9801	35.9657	35.9394	35.9009	35.8504	35.7878	35.7131	35.6262	35.5273	35.4163	35.2933	35.1584	35.0117	34.8533	34.6833	34.5019	34.3092	34.1054	33.8907	33.6653	33.4294	33.1833	32.9272	32.6613	32.386	32.1015	31.8081
	-0.662174	0.426115		-0.0498437	0.3479				32.6031	32.5788	32.5464	32.506	32.4577	32.4017	32.3382	32.2672	32.1891	32.0967	31.997	31.8903	31.7765	31.6561	31.5291	31.3958	31.2563	31.111	30.9599	30.8034	30.6417	30.4749	30.3034	30.1273	29.9468	29.7623	29.5739	29.3818	29.1863	28.9877	28.786	28.5816	28.3746	28.1653	27.9538	27.7404	27.5252	27.3084	27.0903	26.871	26.6506
	-0.692228	0.423623		0.0903543	0.332642				9.18621	9.23353	9.28246	9.33302	9.38523	9.43912	9.49472	9.55205	9.61113	9.67199	9.73463	9.7991	9.86539	9.93353	10.0035	10.0754	10.1492	10.2249	10.3025	10.382	10.4634	10.5468	10.6407	10.7371	10.836	10.9375	11.0415	11.1481	11.2574	11.3693	11.4838	11.6011	11.721	11.8437	11.9692	12.0975	12.2285	12.3624	12.4991	12.6386	12.7811
	-0.724871	0.42163		0.24472	0.338745				33.3552	33.4244	33.4989	33.5785	33.663	33.7519	33.8452	33.9424	34.0432	34.1474	34.2545	34.3644	34.4766	34.5908	34.7068	34.824	34.9423	35.0613	35.1807	35.3	35.4239	35.5468	35.6684	35.7884	35.9064	36.0222	36.1355	36.2459	36.3531	36.4569	36.5569	36.653	36.7447	36.8319	36.9144	36.9917	37.0638	37.1304	37.1913	37.2463	37.2951
	-0.760038	0.422876		0.412799	0.3479				6.86956	6.77387	6.6803	6.58823	6.49835	6.41066	6.32516	6.24185	6.16073	6.08178	6.00499	5.93036	5.85787	5.7875	5.71922	5.65303	5.5889	5.52679	5.46669	5.40857	5.3524	5.29814	5.24576	5.19523	5.14651	5.09957	5.05438	5.01089	4.96906	4.92887	4.89026	4.8532	4.81764	4.78356	4.75091	4.71964	4.68972	4.66111	4.63376	4.60765	4.58272
	-0.797669	0.422876		0.594051	0.369263				5.69923	5.68446	5.67053	5.6574	5.64503	5.63339	5.62243	5.61213	5.60245	5.60245	5.60245	5.60245	5.60245	5.60245	5.60245	5.60245	5.60245	5.60245	5.60245	5.60245	5.60245	5.60245	5.60245	5.60245	5.60245	5.60245	5.60245	5.60245	5.60245	5.60245	5.60245	5.60245	5.60245	5.60245	5.60245	5.60245	5.60245	5.60245	5.60245	5.60245	5.60245
	-0.837706	0.424371		0.787821	0.402832				14.9115	14.8159	14.7408	14.6699	14.6036	14.5417	14.4843	14.4317	14.3837	14.3406	14.3024	14.2691	14.2408	14.2176	14.1996	14.1868	14.1793	14.1772	14.1805	14.1892	14.2035	14.2235	14.249	14.2676	14.2911	14.3196	14.3531	14.3916	14.4178	14.4502	14.4886	14.533	14.5834	14.6397	14.7019	14.7699	14.8436	14.9231	15.0082	15.0989	15.1951
	-0.880088	0.424122		0.993328	0.408936				17.8727	17.6764	17.4863	17.3026	17.1254	16.9546	16.7904	16.6267	16.4701	16.3206	16.1783	16.0432	15.9154	15.7949	15.6822	15.5769	15.4791	15.3888	15.306	15.2307	15.1631	15.103	15.0505	15.0225	15.0012	14.9865	14.9786	14.9775	14.9832	14.9959	15.0156	15.0422	15.0759	15.1166	15.1644	15.2193	15.2813	15.3503	15.4264	15.5096	15.5999
	-0.924753	0.424122		1.2097	0.378418				11.7303	11.7863	11.8479	11.9152	11.9883	12.0674	12.1525	12.2439	12.3416	12.4459	12.5377	12.6352	12.7384	12.8474	12.9624	13.0835	13.2108	13.3444	13.4843	13.6308	13.7925	13.9604	14.1347	14.3154	14.5027	14.6968	14.8976	15.1055	15.3204	15.5426	15.772	16.0088	16.2531	16.5049	16.7644	17.0316	17.3066	17.5894	17.8649	18.1473	18.4366
	-0.971623	0.424869		1.43598	0.323486				12.2319	12.458	12.6898	12.9274	13.1707	13.4196	13.6741	13.9342	14.1997	14.4706	14.7468	15.0281	15.3145	15.6058	15.9019	16.2027	16.5079	16.8175	17.1312	17.4488	17.7701	18.0951	18.4233	18.7546	19.0855	19.4188	19.7543	20.0916	20.4305	20.7708	21.1121	21.4542	21.7967	22.1393	22.4818	22.8238	23.165	23.5051	23.8438	24.1808	24.5157
	-1.0206	0.423125		1.67117	0.338745				25.9848	26.0633	26.1382	26.2096	26.2775	26.3419	26.4028	26.4602	26.5141	26.5646	26.6115	26.6551	26.6952	26.7319	26.7652	26.7951	26.8217	26.8449	26.8648	26.8814	26.8947	26.9047	26.9114	26.9149	26.9151	26.9121	26.9058	26.8962	26.8834	26.8673	26.8479	26.8252	26.7992	26.7698	26.7371	26.701	26.6615	26.6185	26.572	26.522	26.4685
	-1.07155	0.419636		1.91423	0.378418				35.6404	35.6229	35.5943	35.5548	35.5068	35.4484	35.3797	35.301	35.2125	35.1144	35.007	34.8905	34.7654	34.6317	34.4899	34.3403	34.1832	34.0189	33.8477	33.6701	33.4864	33.2969	33.102	32.9021	32.6975	32.4886	32.2758	32.0595	31.84	31.6177	31.393	31.1662	30.9377	30.7079	30.4771	30.2456	30.0138	29.782	29.5506	29.324	29.0986
	-1.12429	0.417144		2.16416	0.390625				19.5967	19.6802	19.7607	19.8382	19.9125	19.9838	20.052	20.117	20.1789	20.2376	20.2931	20.3454	20.3945	20.4404	20.4831	20.5227	20.559	20.5923	20.6224	20.6494	20.6734	20.6943	20.7123	20.7273	20.7338	20.7371	20.7373	20.7343	20.7282	20.7191	20.7069	20.6918	20.6737	20.6527	20.6289	20.6023	20.5729	20.5409	20.5063	20.469	20.4292
	-1.17857	0.419885		2.42001	0.421143				14.5525	14.5214	14.4905	14.4599	14.4295	14.4054	14.3812	14.3569	14.3325	14.3079	14.2833	14.2586	14.2339	14.2091	14.1843	14.1594	14.1346	14.1099	14.0851	14.0604	14.0314	14.0022	13.9728	13.9432	13.9135	13.8835	13.8533	13.823	13.7924	13.7616	13.7306	13.6993	13.6679	13.6362	13.6042	13.572	13.5395	13.5067	13.4736	13.4402	13.4065
	-1.23403	0.417643		2.68086	0.396729				28.3917	28.7283	29.0653	29.4091	29.7597	30.1168	30.4804	30.8502	31.226	31.6076	31.9949	32.3875	32.7853	33.188	33.5954	34.0072	34.4232	34.8431	35.2666	35.6934	36.1232	36.5558	36.9908	37.428	37.867	38.3074	38.7491	39.1916	39.6346	40.0778	40.5209	40.9427	41.3623	41.7795	42.1936	42.6044	43.0114	43.4143	43.8125	44.2057	44.5975
	-1.29023	0.413656		2.94583	0.332642				49.3615	49.1874	48.9967	48.7946	48.5756	48.3396	48.0868	47.8171	47.5307	47.2278	46.9085	46.5731	46.2219	45.855	45.4728	45.0756	44.6639	44.2379	43.7981	43.3449	42.8789	42.4004	41.9101	41.4084	40.8958	40.373	39.8405	39.2989	38.7489	38.1909	37.6258	37.054	36.4763	35.8932	35.3055	34.7138	34.1187	33.517	32.9135	32.3088	31.7035
	-1.34667	0.408173		3.21411	0.283813				49.3615	49.1874	48.9967	48.7946	48.5756	48.3396	48.0868	47.8171	47.5307	47.2278	46.9085	46.5731	46.2219	45.855	45.4728	45.0756	44.6639	44.2379	43.7981	43.3449	42.8789	42.4004	41.9101	41.4084	40.8958	40.373	39.8405	39.2989	38.7489	38.1909	37.6258	37.054	36.4763	35.8932	35.3055	34.7138	34.1187	33.517	32.9135	32.3088	31.7035
	-1.40276	0.408423		3.4849	0.286865				61.9516	61.2944	60.6386	59.9847	59.3331	58.6843	58.0388	57.3766	56.7198	56.0686	55.4234	54.7845	54.1523	53.527	52.909	52.2986	51.696	51.1044	50.5211	49.9461	49.3798	48.8224	48.274	47.7348	47.2051	46.6849	46.1744	45.6737	45.1827	44.7018	44.2309	43.7701	43.3194	42.8789	42.4485	42.0282	41.618	41.2178	40.8276	40.4568	40.0952
	-1.45794	0.412908		3.75745	0.274658				48.288	48.1497	48.0047	47.8529	47.6941	47.5283	47.3554	47.1753	46.9879	46.7933	46.5913	46.3819	46.1651	45.9408	45.7092	45.4701	45.2236	44.9697	44.7086	44.4401	44.1644	43.8816	43.5918	43.2851	42.9723	42.6533	42.3284	41.9977	41.6613	41.3194	40.9721	40.6197	40.2623	39.8735	39.4819	39.0874	38.6904	38.291	37.8894	37.4858	37.0803
	-1.51162	0.414652		4.03085	0.274658				25.2826	25.4071	25.5267	25.6411	25.7502	25.8539	25.952	26.0444	26.131	26.2117	26.2863	26.3549	26.4173	26.4734	26.5232	26.5667	26.6039	26.6346	26.659	26.677	26.6886	26.694	26.693	26.6858	26.6724	26.653	26.6275	26.5961	26.559	26.5161	26.4677	26.4139	26.3548	26.2905	26.2213	26.1473	26.0642	25.9764	25.8841	25.7873	25.6863
	-1.56324	0.417144		4.30388	0.32959				31.8856	31.9461	32.0075	32.0638	32.115	32.1611	32.2022	32.2383	32.2696	32.296	32.3171	32.3336	32.3454	32.3528	32.3558	32.3545	32.3491	32.3397	32.3264	32.3093	32.2886	32.2644	32.2369	32.2063	32.1726	32.136	32.0968	32.0759	32.0539	32.031	32.0076	31.9838	31.9598	31.936	31.9124	31.8895	31.8674	31.8463	31.8265	31.8082	31.7917
	-1.61228	0.416148		4.575	0.3479				15.2027	15.205	15.2033	15.1975	15.1876	15.1736	15.1555	15.1331	15.1067	15.076	15.0412	15.0023	14.9593	14.9121	14.861	14.8058	14.7467	14.6837	14.6168	14.5462	14.4719	14.394	14.3126	14.2277	14.1395	14.048	13.9535	13.8559	13.7553	13.652	13.5461	13.4376	13.3267	13.2135	13.0981	12.9808	12.8616	12.7406	12.6181	12.4941	12.3688
	-1.6583	0.415649		4.84235	0.357056				36.1917	36.3859	36.5784	36.7591	36.9279	37.0844	37.2285	37.36	37.4785	37.5841	37.6765	37.7555	37.8212	37.8732	37.9117	37.9364	37.9474	37.9446	37.928	37.8977	37.8536	37.7957	37.7243	37.6392	37.5407	37.4288	37.3037	37.1654	37.0143	36.8504	36.6739	36.4851	36.2842	36.0714	35.847	35.6111	35.3642	35.1064	34.8382	34.5597	34.2713
	-1.70091	0.416895		5.10385	0.360107				22.5687	22.7153	22.8583	22.9974	23.1324	23.2631	23.3893	23.5108	23.6272	23.7385	23.8445	23.9448	24.0394	24.1281	24.2106	24.2868	24.3566	24.4197	24.4761	24.5256	24.5681	24.6034	24.6316	24.6523	24.6657	24.6716	24.6699	24.6606	24.6437	24.6191	24.5868	24.5469	24.4993	24.444	24.3811	24.3107	24.2328	24.1474	24.0547	23.9547	23.8475
	-1.7398	0.419636		5.35719	0.308228				20.9362	20.762	20.5917	20.4253	20.2627	20.104	19.9491	19.798	19.6483	19.5025	19.3606	19.2226	19.0885	18.9581	18.8314	18.7084	18.5891	18.4733	18.3611	18.2523	18.1469	18.0448	17.9459	17.8503	17.7578	17.6683	17.5818	17.4982	17.4174	17.3394	17.264	17.1913	17.121	17.0568	16.9947	16.9346	16.8767	16.8207	16.7665	16.7143	16.6638
	-1.77475	0.42462		5.59998	0.222778				26.474	26.633	26.7924	26.9521	27.1118	27.2714	27.4307	27.5894	27.7474	27.9045	28.0605	28.2152	28.3684	28.5119	28.653	28.7916	28.9273	29.0599	29.1894	29.3153	29.4377	29.5561	29.6706	29.7808	29.8865	29.9877	30.0842	30.1757	30.2621	30.3433	30.4191	30.4894	30.5541	30.613	30.6661	30.7131	30.7541	30.7905	30.8205	30.8442	30.8614
	-1.8056	0.421381		5.82985	0.253296				38.2559	38.3455	38.4433	38.5492	38.663	38.7849	38.9146	39.0521	39.1972	39.3499	39.5101	39.6775	39.8522	40.0339	40.2311	40.4345	40.644	40.8595	41.0808	41.3242	41.5741	41.8304	42.093	42.3618	42.6366	42.9173	43.2038	43.4958	43.7933	44.096	44.4038	44.7166	45.0341	45.3561	45.6487	45.9434	46.2397	46.5375	46.8363	47.1359	47.4359
	-1.83225	0.422876		6.04469	0.357056				44.3426	44.2798	44.2146	44.147	44.0771	44.0047	43.93	43.8542	43.7761	43.6956	43.6129	43.5278	43.4405	43.3509	43.259	43.1649	43.0611	42.9557	42.8485	42.7396	42.6291	42.5385	42.4477	42.3568	42.2658	42.1748	42.0841	41.9937	41.9037	41.7949	41.688	41.5832	41.4806	41.3803	41.2823	41.187	41.0844	40.9841	40.8861	40.7905	40.6975
	-1.85469	0.419387		6.2427	0.445557				31.1453	31.0664	30.985	30.9012	30.815	30.7265	30.6357	30.5427	30.4475	30.35	30.2504	30.1487	30.0448	29.9388	29.8307	29.7205	29.6081	29.4936	29.377	29.2583	29.1373	29.0142	28.8889	28.7613	28.6314	28.4992	28.3646	28.2277	28.0883	27.9465	27.8021	27.6552	27.5057	27.3536	27.1987	27.0411	26.871	26.6986	26.5239	26.347	26.1676
	-1.87296	0.4154		6.42244	0.411987				37.3683	37.6279	37.8739	38.1061	38.3241	38.5279	38.7173	38.892	39.0521	39.1973	39.3276	39.443	39.5496	39.6416	39.719	39.782	39.8306	39.8649	39.8851	39.8914	39.8839	39.8629	39.8285	39.7811	39.7209	39.6482	39.5855	39.5123	39.4292	39.3365	39.2347	39.1242	39.0057	38.8795	38.7462	38.6064	38.4606	38.3094	38.1533	37.993	37.8289
	-1.88714	0.410915		6.5828	0.387573				27.0841	27.1197	27.1546	27.1886	27.2217	27.2538	27.2848	27.3145	27.3391	27.3625	27.3845	27.4052	27.4244	27.4419	27.4577	27.4716	27.4836	27.4934	27.5011	27.5064	27.5092	27.5096	27.5073	27.5023	27.4944	27.4836	27.4699	27.453	27.4329	27.4096	27.383	27.353	27.3196	27.2828	27.2494	27.2128	27.1732	27.1305	27.0846	27.0357	26.9837
	-1.89736	0.407426		6.72306	0.418091				37.6328	37.6506	37.6726	37.6985	37.7281	37.7613	37.7978	37.8373	37.8798	37.9249	37.9725	38.0222	38.0738	38.1217	38.1714	38.2176	38.2646	38.3122	38.3601	38.408	38.4556	38.5027	38.5489	38.5941	38.6378	38.6799	38.7201	38.7581	38.7938	38.8269	38.8571	38.8842	38.9081	38.9286	38.9454	38.9553	38.9615	38.9638	38.9619	38.9558	38.9452
	-1.90375	0.408173		6.84284	0.402832				66.8068	66.7551	66.7103	66.672	66.6401	66.6145	66.5948	66.5665	66.5446	66.5289	66.5189	66.5145	66.5154	66.5211	66.5315	66.5359	66.5359	66.5394	66.5461	66.5555	66.5674	66.5813	66.597	66.6141	66.6322	66.6646	66.6966	66.7278	66.7581	66.7871	66.8146	66.8404	66.8641	66.8856	66.9047	66.9211	66.9346	66.945	66.9383	66.9291	66.9248
	-1.90647	0.413157		6.94217	0.390625				17.0052	17.1126	17.2263	17.3462	17.4725	17.605	17.744	17.8673	17.9956	18.1289	18.2671	18.4101	18.5578	18.7102	18.8671	19.0285	19.1942	19.3641	19.5381	19.716	19.8977	20.0831	20.2719	20.4641	20.6594	20.8575	21.0585	21.2619	21.4677	21.6755	21.8852	22.0965	22.3091	22.5228	22.7373	22.9524	23.1733	23.3939	23.6138	23.8327	24.0505
	-1.90567	0.417643		7.02144	0.424194				19.8345	19.8932	19.9491	20.002	20.0518	20.0982	20.1412	20.1805	20.216	20.2475	20.2749	20.298	20.3167	20.3309	20.3404	20.345	20.3447	20.3394	20.3289	20.3131	20.2921	20.2656	20.2336	20.1961	20.153	20.1042	20.0498	19.9898	19.924	19.8525	19.7753	19.6925	19.604	19.5099	19.4104	19.3053	19.1948	19.079	18.958	18.8318	18.7007
	-1.90147	0.415898		7.08145	0.448608				36.2469	36.1336	36.0143	35.8891	35.7582	35.6216	35.4683	35.3103	35.1477	34.9804	34.8086	34.6323	34.4518	34.267	34.0782	33.8854	33.6887	33.4882	33.2841	33.0766	32.8656	32.6515	32.4342	32.2139	31.9908	31.765	31.5366	31.3058	31.0726	30.8373	30.5999	30.3606	30.1195	29.8767	29.6323	29.3865	29.1439	28.8999	28.6544	28.4077	28.1599
	-1.89402	0.421381		7.1234	0.482178				29.8504	30.0298	30.2085	30.3862	30.5628	30.7384	30.9127	31.0857	31.2573	31.4273	31.5956	31.7622	31.9269	32.0896	32.2397	32.3869	32.531	32.672	32.8097	32.9439	33.0745	33.2014	33.3244	33.4433	33.558	33.6684	33.776	33.8789	33.9769	34.0699	34.1578	34.2404	34.3175	34.3892	34.4552	34.5155	34.5698	34.6181	34.6604	34.6964	34.7261
	-1.88341	0.428856		7.14888	0.45166				38.1171	37.9304	37.7472	37.5671	37.3898	37.2148	37.0419	36.8707	36.7008	36.5319	36.3636	36.1956	36.0194	35.8434	35.6671	35.4904	35.3129	35.1343	34.9542	34.7725	34.5683	34.3632	34.157	33.9492	33.7397	33.5283	33.3147	33.0987	32.9115	32.7197	32.5233	32.3222	32.1164	31.906	31.6909	31.4713	31.2471	31.0185	30.7856	30.5484	30.3071
	-1.86972	0.430601		7.15979	0.408936				22.9843	22.9943	23.0061	23.0197	23.0352	23.0527	23.0724	23.0943	23.1185	23.1451	23.1742	23.2058	23.2529	23.3036	23.3578	23.4157	23.4773	23.5428	23.6123	23.6857	23.7631	23.8447	23.9304	24.0203	24.1144	24.2129	24.3156	24.4226	24.534	24.6498	24.7699	24.8943	25.006	25.1208	25.2389	25.36	25.4842	25.6113	25.7412	25.8738	26.009
	-1.85303	0.425866		7.15806	0.415039				22.1082	22.0777	22.0495	22.0237	22.0003	21.9793	21.9605	21.9441	21.93	21.9181	21.9085	21.9011	21.8958	21.8926	21.8914	21.8922	21.895	21.8995	21.9059	21.9139	21.9243	21.9361	21.9493	21.9637	21.9793	21.9959	22.0134	22.0317	22.0507	22.0702	22.09	22.1101	22.1303	22.1504	22.1703	22.1898	22.2088	22.227	22.2444	22.2607	22.2758
	-1.83334	0.422128		7.14541	0.405884				25.3732	25.2544	25.1258	24.9968	24.8675	24.7379	24.6079	24.4776	24.3468	24.2156	24.0839	23.9519	23.8194	23.6866	23.5534	23.4198	23.286	23.1519	23.0176	22.883	22.7664	22.6486	22.5297	22.4099	22.2893	22.168	22.041	21.9133	21.7849	21.6559	21.5264	21.3965	21.2664	21.136	21.0055	20.8751	20.7446	20.6143	20.4843	20.3545	20.2251
	-1.81069	0.423872		7.12312	0.387573				22.3039	22.2947	22.2833	22.2694	22.2529	22.2335	22.2113	22.1859	22.1573	22.1254	22.0898	22.0507	22.0077	21.9608	21.9098	21.8547	21.7953	21.7316	21.6633	21.5906	21.5132	21.4311	21.3442	21.2526	21.1561	21.0531	20.9454	20.8328	20.7154	20.5932	20.4663	20.3346	20.1983	20.0572	19.9116	19.7615	19.6069	19.448	19.2849	19.1176	18.9463
	-1.78508	0.422128		7.09197	0.369263				17.895	17.7134	17.5284	17.34	17.1485	16.9539	16.7565	16.5564	16.3538	16.1488	15.9416	15.7324	15.5214	15.3087	15.0946	14.8792	14.6626	14.4451	14.2269	14.0081	13.789	13.5696	13.3502	13.1309	12.9119	12.6935	12.4757	12.2587	12.0428	11.8279	11.6144	11.4024	11.1919	10.9832	10.7764	10.5716	10.3659	10.1626	9.96197	9.76397	9.56871
	-1.75653	0.420633		7.0522	0.363159				15.1752	15.151	15.1286	15.1079	15.1115	15.1154	15.1194	15.1236	15.1281	15.1327	15.1376	15.1427	15.1481	15.1536	15.1595	15.1656	15.172	15.1787	15.1857	15.193	15.2006	15.2086	15.2168	15.2255	15.2345	15.2438	15.2536	15.2637	15.2743	15.2852	15.2966	15.3084	15.3207	15.3334	15.3466	15.3603	15.3745	15.3892	15.4044	15.4201	15.4363
	-1.7251	0.421381		7.00368	0.378418				16.1075	16.1234	16.1425	16.1649	16.1908	16.2201	16.2529	16.2893	16.3293	16.3729	16.4202	16.4712	16.5111	16.5539	16.5996	16.648	16.6992	16.7531	16.8098	16.869	16.9309	16.9953	17.0622	17.1315	17.2031	17.277	17.3531	17.4313	17.5115	17.5935	17.6774	17.763	17.8501	17.9388	18.0287	18.1198	18.2121	18.3052	18.3992	18.4938	18.5889
	-1.69089	0.419387		6.946	0.442505				19.9017	19.7462	19.5969	19.4538	19.3168	19.1795	19.0483	18.9231	18.8037	18.6898	18.5814	18.4783	18.3803	18.2872	18.1989	18.1153	18.0362	17.9613	17.8907	17.8311	17.775	17.7161	17.66	17.6066	17.5557	17.5072	17.461	17.4169	17.3749	17.3347	17.2962	17.2594	17.2241	17.1902	17.1575	17.126	17.0955	17.0659	17.0371	17.009	16.9814
	-1.65406	0.41839		6.87867	0.476074				28.5728	28.1447	27.7139	27.2806	26.8454	26.4086	25.9706	25.5318	25.0926	24.6533	24.2144	23.7761	23.3389	22.9031	22.469	22.037	21.6073	21.1765	20.749	20.3249	19.9046	19.4884	19.0764	18.6689	18.2662	17.8684	17.4757	17.0884	16.7067	16.3306	15.9604	15.5961	15.238	14.8862	14.5208	14.1631	13.8131	13.4709	13.1364	12.8097	12.4907
	-1.61483	0.418889		6.80116	0.460815				30.0581	30.2077	30.3478	30.4781	30.5982	30.7079	30.8069	30.8949	30.9716	31.0368	31.0903	31.1318	31.1613	31.1785	31.1833	31.1756	31.1552	31.1222	31.0765	31.0179	30.9467	30.8664	30.7733	30.6672	30.5484	30.417	30.273	30.1167	29.9482	29.7677	29.5755	29.3717	29.1567	28.9308	28.6941	28.4471	28.19	27.9232	27.6471	27.3619	27.0682
	-1.57351	0.420135		6.71289	0.442505				30.6399	30.8197	31.0019	31.1866	31.3736	31.5629	31.7544	31.9482	32.144	32.3418	32.5415	32.743	32.9461	33.1508	33.3569	33.5642	33.7908	34.0196	34.2502	34.4827	34.717	34.9528	35.1901	35.4287	35.6685	35.9094	36.1511	36.3935	36.6366	36.8878	37.1398	37.3925	37.6457	37.8992	38.1531	38.4072	38.6613	38.9154	39.1694	39.4153	39.6614
	-1.53045	0.423623		6.61325	0.43335				27.5978	27.6394	27.6813	27.7235	27.7661	27.8088	27.8518	27.8949	27.9381	27.9813	28.0246	28.0677	28.1108	28.1536	28.1963	28.2385	28.2805	28.3219	28.3629	28.4032	28.4429	28.4819	28.52	28.5572	28.5935	28.6286	28.6626	28.6954	28.7268	28.7568	28.7853	28.8121	28.8373	28.8606	28.882	28.9014	28.9187	28.9337	28.9465	28.9568	28.9647
	-1.48607	0.425866		6.50166	0.405884				21.653	21.8571	22.0627	22.2694	22.477	22.6852	22.8937	23.1021	23.3102	23.5177	23.7243	23.9295	24.1332	24.3349	24.5343	24.7311	24.9249	25.1153	25.3021	25.4849	25.6633	25.84	26.0115	26.1774	26.3373	26.4911	26.6382	26.7785	26.9116	27.0373	27.1551	27.2649	27.3664	27.4593	27.5434	27.6183	27.684	27.7402	27.7866	27.8232	27.8496
	-1.4408	0.428358		6.37747	0.39978				26.1185	26.134	26.155	26.1813	26.2131	26.2501	26.2925	26.3401	26.3927	26.4504	26.513	26.5803	26.6522	26.7285	26.8091	26.8937	26.9821	27.0742	27.1696	27.2681	27.3696	27.4742	27.5811	27.69	27.8006	27.9126	28.0256	28.1394	28.2536	28.3678	28.4818	28.5953	28.7077	28.8189	28.9285	29.036	29.1413	29.2439	29.3435	29.4397	29.5323
	-1.39505	0.429355		6.24002	0.405884				16.5377	16.2602	15.9851	15.7124	15.4424	15.1752	14.911	14.65	14.3923	14.1381	13.8875	13.6406	13.3977	13.1586	12.9237	12.6929	12.4665	12.2443	12.0266	11.8133	11.6046	11.4004	11.2009	11.006	10.8158	10.6303	10.4415	10.2579	10.0794	9.90608	9.73782	9.57459	9.41633	9.26299	9.11452	8.97084	8.83189	8.6976	8.56789	8.44268	8.32189
	-1.34918	0.428109		6.08869	0.38147				24.8636	24.905	24.9462	24.9868	25.0268	25.0658	25.1037	25.1402	25.1752	25.2084	25.2396	25.2687	25.2954	25.3196	25.3411	25.3597	25.3752	25.3876	25.3965	25.402	25.4037	25.4147	25.4209	25.4224	25.419	25.4107	25.3974	25.3791	25.3558	25.3274	25.2939	25.2552	25.2114	25.1625	25.1085	25.0493	24.985	24.9157	24.8413	24.762	24.6777
	-1.30348	0.422876		5.92299	0.332642				24.31	24.5556	24.8032	25.0527	25.3041	25.5574	25.8127	26.0698	26.2968	26.5238	26.7505	26.9769	27.2029	27.4285	27.6535	27.878	28.1017	28.3248	28.5471	28.7685	28.9891	29.2089	29.4277	29.6455	29.8624	30.0783	30.2932	30.5071	30.72	30.9319	31.1428	31.3527	31.5616	31.7696	31.9766	32.1827	32.3879	32.5922	32.7957	32.9984	33.2002
	-1.25815	0.420135		5.74262	0.283813				25.9783	26.4563	26.9367	27.4193	27.9037	28.3895	28.8762	29.3636	29.8792	30.3964	30.9149	31.4343	31.9544	32.4749	32.9954	33.5156	34.0353	34.5542	35.0719	35.5883	36.0884	36.5856	37.0796	37.5702	38.057	38.5398	39.0183	39.4922	39.9614	40.4254	40.8842	41.3376	41.7852	42.2271	42.6629	43.0925	43.5158	43.9327	44.343	44.7467	45.1436
	-1.21336	0.422128		5.54751	0.292969				22.5362	22.4486	22.3596	22.2691	22.1774	22.0843	21.99	21.8944	21.7978	21.7002	21.6015	21.5096	21.4165	21.3223	21.2271	21.1311	21.0342	20.9366	20.8385	20.7398	20.6408	20.5416	20.4421	20.3427	20.2432	20.1439	20.0449	19.9461	19.8479	19.7501	19.653	19.5566	19.4609	19.3662	19.2724	19.1797	19.0881	18.9977	18.9085	18.8207	18.7448
	-1.16919	0.422876		5.33789	0.323486				5.15566	5.02092	4.89087	4.7654	4.64444	4.52789	4.41567	4.30768	4.20383	4.10402	4.00815	3.91613	3.82785	3.74322	3.66214	3.5845	3.51021	3.43917	3.37128	3.30643	3.24453	3.18549	3.1292	3.07557	3.02452	2.97593	2.92973	2.88583	2.84413	2.80455	2.76701	2.73142	2.6977	2.66578	2.63558	2.60702	2.58003	2.55454	2.53048	2.50779	2.48639
	-1.12566	0.420882		5.11434	0.320435				3.86279	3.78888	3.71821	3.65066	3.58615	3.52458	3.46584	3.40984	3.3565	3.3057	3.25737	3.21141	3.16773	3.12625	3.08688	3.04953	3.01413	2.98059	2.94883	2.91878	2.89037	2.86352	2.83816	2.81423	2.79165	2.77037	2.75033	2.73145	2.7137	2.697	2.68131	2.68131	2.68131	2.68131	2.68131	2.68131	2.68131	2.68131	2.68131	2.68131	2.68131
	-1.08279	0.421879		4.87787	0.320435				27.9344	28.0759	28.2179	28.3603	28.5031	28.646	28.789	28.932	29.0749	29.2175	29.3597	29.5014	29.6425	29.7827	29.9221	30.0604	30.1976	30.3333	30.4676	30.6003	30.7312	30.8601	30.9869	31.1115	31.2337	31.3707	31.506	31.6397	31.7715	31.9015	32.0295	32.1555	32.2793	32.401	32.5204	32.6376	32.7523	32.8647	32.9746	33.082	33.1869
	-1.04057	0.423872		4.6299	0.311279
	-0.999085	0.422626		4.37228	0.289917
	-0.958488	0.419885		4.10734	0.323486
	-0.919	0.42163		3.83782	0.32959
	-0.880898	0.423125		3.56675	0.286865
	-0.844475	0.420633		3.29729	0.250244
	-0.810009	0.423374		3.03255	0.241089
	-0.777731	0.424371		2.77556	0.256348
	-0.747825	0.423125		2.52916	0.280762
	-0.720432	0.421381		2.29591	0.326538
	-0.69566	0.420135		2.07806	0.335693
	-0.673594	0.420384		1.87733	0.354004
	-0.654306	0.417892		1.69493	0.357056
	-0.637859	0.419885		1.53144	0.384521
	-0.6243	0.421879		1.38686	0.387573
	-0.613658	0.424371		1.26067	0.43335
	-0.60594	0.426115		1.15189	0.445557
	-0.601114	0.429853		1.05924	0.436401
	-0.599117	0.429604		0.981257	0.427246
	-0.599859	0.426115		0.916416	0.390625
	-0.603234	0.418889		0.863241	0.427246
	-0.609125	0.421381		0.82041	0.430298
	-0.617419	0.425617		0.786831	0.430298
	-0.628	0.422876		0.761709	0.430298
	-0.640747	0.417892		0.744601	0.48523
	-0.655533	0.417393		0.735439	0.48523
	-0.672235	0.418639		0.734493	0.500488
	-0.690754	0.419885		0.742319	0.473022
	-0.711043	0.423872		0.759686	0.457764
	-0.733104	0.428607		0.787544	0.457764
	-0.756956	0.429604		0.827009	0.387573
	-0.78261	0.428607		0.879359	0.317383
	-0.810055	0.427859		0.945984	0.354004
	-0.839277	0.425118		1.02827	0.375366
	-0.870275	0.425118		1.12747	0.402832
	-0.903071	0.422626		1.24459	0.43335
	-0.937698	0.424869		1.38031	0.405884
	-0.974211	0.428607		1.53495	0.369263
	-1.01268	0.430102		1.70837	0.311279
	-1.05316	0.425617		1.89988	0.244141
	-1.09568	0.417643		2.10825	0.265503
	-1.14016	0.416148		2.33177	0.305176
	-1.1865	0.416148		2.56834	0.32959
	-1.23446	0.410665		2.81563	0.326538
	-1.28372	0.411164		3.07125	0.326538
	-1.3339	0.412659		3.33281	0.32959
	-1.38451	0.413905		3.59801	0.292969
	-1.43509	0.413905		3.8647	0.289917
	-1.48517	0.412908		4.13086	0.259399
	-1.53433	0.415151		4.39461	0.256348
	-1.58219	0.416397		4.65424	0.296021
	-1.62843	0.4154		4.90818	0.314331
	-1.67278	0.412659		5.15507	0.32959
	-1.71503	0.40618		5.39375	0.341797
	-1.75495	0.403439		5.6233	0.299072
	-1.79231	0.407675		5.84294	0.335693
	-1.8269	0.411164		6.05204	0.366211
	-1.85851	0.41216		6.25004	0.415039
	-1.88696	0.413656		6.43646	0.38147
	-1.91213	0.41216		6.61102	0.442505
	-1.9339	0.416148		6.77358	0.408936
	-1.95224	0.414652		6.92409	0.421143
	-1.96717	0.410167		7.06261	0.421143
	-1.97877	0.410665		7.18917	0.402832
	-1.98717	0.407924		7.30371	0.363159
	-1.99253	0.40618		7.40605	0.292969
	-1.995	0.408921		7.49587	0.271606
	-1.99474	0.411911		7.57278	0.292969
	-1.99186	0.412659		7.63639	0.289917
	-1.98645	0.413905		7.68631	0.262451
	-1.97853	0.416895		7.72223	0.292969
	-1.96809	0.420633		7.74387	0.32959
	-1.95506	0.419138		7.75107	0.292969
	-1.93931	0.416397		7.74377	0.259399
	-1.92069	0.421131		7.72211	0.268555
	-1.89906	0.42462		7.68636	0.289917
	-1.8743	0.427361		7.63689	0.27771
	-1.84636	0.428109		7.57414	0.253296
	-1.81532	0.426613		7.4985	0.259399
	-1.78133	0.424122		7.41035	0.286865
	-1.74456	0.42462		7.31	0.286865
	-1.70526	0.422876		7.19773	0.317383
	-1.66367	0.422128		7.07386	0.305176
	-1.62006	0.42761		6.93871	0.271606
	-1.57471	0.425368		6.7927	0.253296
	-1.52794	0.423374		6.63631	0.238037
	-1.48005	0.428109		6.47004	0.22583
	-1.43136	0.427859		6.29437	0.216675
	-1.38219	0.429105		6.10971	0.216675
	-1.33286	0.426364		5.91639	0.219727
	-1.28364	0.420882		5.71461	0.228882
	-1.23478	0.412659		5.50443	0.201416
	-1.18647	0.413905		5.28581	0.210571
	-1.13887	0.417144		5.05868	0.283813
	-1.09207	0.418889		4.82319	0.323486
	-1.04615	0.421131		4.57982	0.314331
	-1.00115	0.428607		4.32949	0.299072
	-0.9571	0.43085		4.0736	0.280762
	-0.914069	0.426613		3.81391	0.271606
	-0.872153	0.424122		3.55253	0.292969
	-0.831501	0.42761		3.29182	0.250244
	-0.792326	0.424371		3.03426	0.271606
	-0.754896	0.421381		2.78236	0.274658
	-0.719509	0.41839		2.5385	0.317383
	-0.686453	0.416895		2.30477	0.402832
	-0.655975	0.414902		2.08293	0.442505
	-0.62827	0.41839		1.87432	0.430298
	-0.603482	0.421879		1.67998	0.39978
	-0.581717	0.422128		1.50065	0.402832
	-0.563045	0.425866		1.33679	0.375366
	-0.547517	0.425617		1.18864	0.375366
	-0.535162	0.424122		1.05621	0.32959
	-0.526001	0.426364		0.939318	0.338745
	-0.520055	0.423623		0.837594	0.341797
	-0.51734	0.424869		0.750449	0.317383
	-0.517861	0.423125		0.677091	0.296021
	-0.521598	0.422377		0.616595	0.305176
	-0.528498	0.419885		0.568009	0.302124
	-0.538465	0.418889		0.530454	0.256348
	-0.551372	0.418889		0.503187	0.253296
	-0.567056	0.418889		0.485681	0.271606
	-0.585335	0.420384		0.477676	0.265503
	-0.606006	0.422626		0.479176	0.234985
	-0.628855	0.420135		0.490408	0.210571
	-0.653665	0.417144		0.511778	0.213623
	-0.680228	0.415898		0.543853	0.256348
	-0.70836	0.41839		0.58737	0.299072
	-0.737911	0.417393		0.643232	0.363159
	-0.76877	0.417393		0.712477	0.3479
	-0.800864	0.419636		0.796191	0.341797
	-0.834147	0.419636		0.895369	0.350952
	-0.868607	0.419138		1.01077	0.405884
	-0.904258	0.418639		1.1428	0.418091
	-0.941126	0.41839		1.29154	0.408936
	-0.979225	0.4154		1.45673	0.411987
	-1.01854	0.416148		1.63794	0.445557
	-1.05902	0.413406		1.83451	0.430298
	-1.10052	0.416646		2.04553	0.436401
	-1.14286	0.417393		2.26978	0.396729
	-1.18576	0.41839		2.50569	0.357056
	-1.22892	0.420384		2.75139	0.354004
	-1.27194	0.416646		3.00477	0.332642
	-1.31443	0.412659		3.26351	0.338745
	-1.35594	0.409669		3.52519	0.305176
	-1.39601	0.408173		3.78746	0.271606
	-1.43417	0.412908		4.04805	0.250244
	-1.47	0.416895		4.3049	0.308228
	-1.50309	0.421879		4.55612	0.360107
	-1.53313	0.425617		4.80002	0.378418
	-1.55988	0.434338		5.03507	0.363159
	-1.58322	0.438325		5.25994	0.27771
	-1.60318	0.438325		5.4735	0.302124
	-1.61987	0.441565		5.67477	0.363159
	-1.63347	0.440568		5.86294	0.384521
	-1.64416	0.442312		6.0374	0.323486
	-1.6521	0.447047		6.19771	0.308228
	-1.65742	0.446798		6.34358	0.335693
	-1.66021	0.442063		6.47497	0.338745
	-1.6605	0.441316		6.59199	0.38147
	-1.65831	0.440817		6.69493	0.338745
	-1.65362	0.435834		6.7842	0.332642
	-1.6464	0.43384		6.86028	0.302124
	-1.6366	0.431597		6.92361	0.338745
	-1.62415	0.429604		6.97458	0.369263
	-1.60899	0.429853		7.01349	0.350952
	-1.59103	0.427859		7.04047	0.292969
	-1.57019	0.428358		7.05548	0.256348
	-1.54641	0.429604		7.05836	0.228882
	-1.51967	0.431099		7.04893	0.265503
	-1.48998	0.431597		7.02708	0.302124
	-1.45742	0.431099		6.99282	0.344849
	-1.42207	0.429604		6.94623	0.427246
	-1.38408	0.423623		6.88746	0.460815
	-1.34363	0.425866		6.81666	0.463867
	-1.30098	0.426613		6.734	0.494385
	-1.25639	0.426364		6.63973	0.479126
	-1.2102	0.423872		6.53416	0.515747
	-1.16276	0.42163		6.41771	0.543213
	-1.1144	0.427859		6.29083	0.482178
	-1.06546	0.429853		6.15399	0.448608
	-1.01626	0.434089		6.0077	0.448608
	-0.967097	0.433092		5.85244	0.442505
	-0.918287	0.430351		5.6887	0.424194
	-0.870138	0.426115		5.51701	0.448608
	-0.822961	0.423374		5.33794	0.531006
	-0.777072	0.425617		5.152	0.521851
	-0.7328	0.421879		4.9596	0.515747
	-0.690498	0.417393		4.76098	0.494385
	-0.650533	0.417144		4.55625	0.491333
	-0.613267	0.422377		4.34543	0.497437
	-0.579035	0.423623		4.12855	0.494385
	-0.548125	0.420135		3.90578	0.50354
	-0.520763	0.416895		3.67747	0.448608
	-0.497107	0.414154		3.44418	0.45166
	-0.477245	0.410915		3.20684	0.445557
	-0.461196	0.405931		2.96677	0.45166
	-0.448917	0.40618		2.72568	0.45166
	-0.440296	0.413406		2.48556	0.427246
	-0.43517	0.420633		2.24858	0.411987
	-0.433335	0.418889		2.0169	0.38147
	-0.434562	0.41216		1.79256	0.344849
	-0.438613	0.407675		1.57741	0.320435
	-0.445251	0.402193		1.37303	0.292969
	-0.454253	0.398455		1.18075	0.289917
	-0.465408	0.399701		1.00158	0.335693
	-0.478523	0.408423		0.836218	0.357056
	-0.493421	0.414154		0.684944	0.32959
	-0.509943	0.418141		0.547702	0.299072
	-0.527954	0.418141		0.424123	0.341797
	-0.547347	0.416646		0.313591	0.344849
	-0.568046	0.412908		0.215346	0.366211
	-0.590004	0.413406		0.128578	0.384521
	-0.61321	0.41839		0.052484	0.357056
	-0.637681	0.422128		-0.0137128	0.32959
	-0.663453	0.425866		-0.0707887	0.3479
	-0.690564	0.423623		-0.119516	0.341797
	-0.719042	0.420633		-0.160609	0.314331
	-0.748887	0.422876		-0.19463	0.305176
	-0.780056	0.425368		-0.221894	0.341797
	-0.81245	0.423623		-0.242387	0.350952
	-0.845919	0.419885		-0.255702	0.311279
	-0.88027	0.418141		-0.261023	0.241089
	-0.915287	0.416646		-0.257171	0.167847
	-0.950748	0.416397		-0.242682	0.15564
	-0.986429	0.416895		-0.215884	0.177002
	-1.02212	0.413656		-0.174994	0.231934
	-1.05761	0.413656		-0.118264	0.268555
	-1.09272	0.417643		-0.0441495	0.292969
	-1.12731	0.422876		0.0485622	0.366211
	-1.16123	0.424122		0.16069	0.38147
	-1.19436	0.425118		0.292631	0.344849
	-1.22653	0.420882		0.44435	0.375366
	-1.25759	0.41216		0.615377	0.338745
	-1.28734	0.407177		0.804865	0.3479
	-1.31562	0.412659		1.01167	0.332642
	-1.34226	0.414154		1.23443	0.280762
	-1.36715	0.411164		1.47154	0.259399
	-1.39021	0.415151		1.72126	0.234985
	-1.41145	0.41839		1.98167	0.183105
	-1.4309	0.41839		2.25078	0.131226
	-1.44866	0.418889		2.52649	0.112915
	-1.46483	0.420633		2.80663	0.164795
	-1.47954	0.419636		3.08899	0.192261
	-1.49293	0.419885		3.3714	0.219727
	-1.50515	0.419138		3.65174	0.247192
	-1.51636	0.419636		3.92806	0.265503
	-1.52671	0.419387		4.19862	0.323486
	-1.53635	0.414403		4.46194	0.32959
	-1.54536	0.411164		4.71673	0.311279
	-1.55385	0.410167		4.96194	0.314331
	-1.56185	0.410416		5.19669	0.302124
	-1.56939	0.415151		5.42032	0.265503
	-1.57648	0.416148		5.6324	0.201416
	-1.58314	0.416895		5.83268	0.15564
	-1.58939	0.414154		6.02101	0.143433
	-1.59523	0.414652		6.19724	0.149536
	-1.60072	0.41241		6.36117	0.201416
	-1.60586	0.411662		6.51259	0.222778
	-1.61071	0.413905		6.7983	0.27771
	-1.6153	0.411911		6.93695	0.326538
	-1.61962	0.413905		7.06264	0.3479
	-1.62369	0.416397		7.17521	0.308228
	-1.62749	0.419387		7.2746	0.308228
	-1.63103	0.41839		7.36077	0.350952
	-1.63431	0.415898		7.4337	0.378418
	-1.63735	0.411164		7.49335	0.338745
	-1.64016	0.410416		7.53961	0.363159
	-1.64274	0.412908		7.57229	0.357056
	-1.64507	0.417643		7.59116	0.357056
	-1.64712	0.416148		7.59603	0.354004
	-1.64884	0.420882		7.58677	0.335693
	-1.65018	0.426115		7.56336	0.38147
	-1.65107	0.426364		7.52592	0.335693
	-1.65145	0.423125		7.47469	0.292969
	-1.65123	0.417393		7.50529	0.280762
	-1.65035	0.414902		7.42779	0.296021
	-1.64874	0.414154		7.42767	0.332642
	-1.64635	0.414403		7.31646	0.366211
	-1.64314	0.412908		7.19615	0.387573
	-1.63907	0.417144		7.2191	0.332642
	-1.63416	0.411911		7.25145	0.308228
	-1.62843	0.407675		7.27638	0.280762
	-1.62194	0.40618		7.31711	0.265503
	-1.61476	0.40917		7.1717	0.280762
	-1.60697	0.409918		7.20881	0.274658
	-1.59868	0.406429		7.18328	0.308228
	-1.59003	0.405931		7.16898	0.308228
	-1.58116	0.408921		6.59798	0.308228
	-1.57224	0.413157		6.46311	0.299072
	-1.56344	0.411413		6.42881	0.274658
	-1.55491	0.407924		6.40022	0.262451
	-1.54678	0.407177		6.28213	0.280762
	-1.53917	0.410915		6.16959	0.238037
	-1.3579	0.408173		6.06235	0.234985
	-1.3594	0.408672		6.05544	0.305176
	-1.36089	0.409669		6.05355	0.3479
	-1.36237	0.413406		5.96163	0.369263
	-1.36385	0.411164		5.87525	0.341797
	-1.36532	0.406927		5.79482	0.357056
	-1.36678	0.405931		5.72076	0.299072
	-1.36824	0.410416		5.65339	0.231934
	-1.36969	0.416148		5.59298	0.241089
	-1.37113	0.418639		5.53974	0.265503
	-1.37256	0.419636		5.49379	0.216675
	-1.37399	0.419387		5.45515	0.20752
	-1.37541	0.419885		5.4237	0.250244
	-1.37682	0.419885		5.3992	0.222778
	-1.37822	0.419885		5.38134	0.164795
	-1.37962	0.423872		5.36968	0.167847
	-1.38101	0.428856		5.36374	0.195312
	-1.38239	0.43085		5.36296	0.201416
	-1.38377	0.429853		5.36678	0.143433
	-1.38514	0.428358		5.37464	0.143433
	-1.3865	0.431847		5.38596	0.106812
	-1.38786	0.428109		5.40012	0.119019
	-1.3892	0.423374		5.41634	0.134277
	-1.39054	0.42462		5.43375	0.177002
	-1.39187	0.42462		5.45136	0.222778
	-1.3932	0.420633		5.4682	0.228882
	-1.39452	0.422128		5.48338	0.20752
	-1.39583	0.425866		5.49615	0.210571
	-1.39714	0.420633		5.50592	0.231934
	-1.39843	0.417144		5.51226	0.231934
	-1.39972	0.420384		5.51485	0.271606
	-1.40101	0.417892		5.51356	0.231934
	-1.40229	0.420384		5.50839	0.238037
	-1.40356	0.417643		5.4995	0.244141
	-1.40482	0.410416		5.48715	0.210571
	-1.40607	0.411164		5.47166	0.247192
	-1.40732	0.413905		5.45334	0.228882
	-1.40857	0.419387		5.43251	0.268555
	-1.4098	0.424122		5.4095	0.274658
	-1.41103	0.42761		5.3846	0.302124
	-1.41225	0.426115		5.3581	0.289917
	-1.41347	0.426364		5.33025	0.311279
	-1.41467	0.422876		5.30122	0.402832
	-1.41587	0.419138		5.27115	0.45166
	-1.41707	0.41839		5.24006	0.442505
	-1.41826	0.418889		5.20789	0.411987
	-1.41944	0.419138		5.1744	0.393677
	-1.42061	0.418889		5.13918	0.38147
	-1.42178	0.422626		5.1016	0.32959
	-1.42294	0.42163		5.06095	0.299072
	-1.42409	0.422377		5.01653	0.323486
	-1.42524	0.423872		4.96782	0.369263
	-1.42637	0.422377		4.91654	0.436401
	-1.42751	0.425118		4.86266	0.488281
	-1.42863	0.42163		4.80661	0.491333
	-1.42975	0.421131		4.74897	0.439453
	-1.43086	0.418639		4.69047	0.378418
	-1.43197	0.413406		4.63196	0.384521
	-1.43306	0.413656		4.57436	0.350952
	-1.43416	0.416895		4.51857	0.305176
	-1.43524	0.417144		4.46547	0.305176
	-1.43632	0.420633		4.41581	0.308228
	-1.43739	0.425368		4.37018	0.320435
	-1.43845	0.431597		4.32899	0.302124
	-1.4395	0.431597		4.29252	0.326538
	-1.44055	0.433342		4.26089	0.350952
	-1.44159	0.429355		4.23416	0.314331
	-1.44263	0.424371		4.2123	0.308228
	-1.44366	0.421879		4.19522	0.341797
	-1.44468	0.425866		4.18282	0.405884
	-1.44569	0.425118		4.17494	0.418091
	-1.4467	0.422876		4.17142	0.442505
	-1.4477	0.422876		4.17203	0.448608
	-1.44869	0.425118		4.17646	0.454712
	-1.44967	0.420384		4.18436	0.463867
	-1.45065	0.415898		4.19537	0.506592
	-1.45162	0.414652		4.20914	0.515747
	-1.45259	0.416148		4.22535	0.527954
	-1.45354	0.415151		4.24369	0.48523
	-1.4545	0.412659		4.26395	0.488281
	-1.45544	0.413656		4.28592	0.500488
	-1.45637	0.415151		4.30943	0.531006
	-1.4573	0.416148		4.3343	0.534058
	-1.45823	0.412659		4.36036	0.445557
	-1.45914	0.409918		4.38744	0.369263
	-1.46005	0.407177		4.41535	0.335693
	-1.46095	0.407177		4.44386	0.372314
	-1.46185	0.401695		4.47272	0.415039
	-1.46274	0.403688		4.50169	0.427246
	-1.46362	0.407177		4.5305	0.43335
	-1.4645	0.411413		4.5589	0.445557
	-1.46536	0.40917		4.58666	0.460815
	-1.46623	0.411164		4.61352	0.43335
	-1.46708	0.410915		4.63921	0.442505
	-1.46793	0.408921		4.66342	0.457764
	-1.46877	0.409669		4.68582	0.466919
	-1.46961	0.414652		4.70607	0.466919
	-1.47044	0.413656		4.72382	0.43335
	-1.47127	0.40917		4.73876	0.448608
	-1.47208	0.407426		4.75064	0.454712
	-1.4729	0.411662		4.75928	0.408936
	-1.4737	0.409419		4.76459	0.344849
	-1.4745	0.403688		4.75996	0.363159
	-1.4753	0.403688		4.75536	0.387573
	-1.47608	0.401944		4.75079	0.387573
	-1.47687	0.404436		4.74623	0.384521
	-1.47764	0.397957		4.74171	0.390625
	-1.47841	0.397707		4.7372	0.405884
	-1.47918	0.401944		4.73272	0.402832
	-1.47994	0.398953		4.72827	0.375366
	-1.48069	0.39995		4.72383	0.341797
	-1.48144	0.404186		4.71943	0.292969
	-1.48218	0.404934		4.71504	0.256348
	-1.48292	0.405682		4.71068	0.228882
	-1.48365	0.405682		4.70634	0.244141
	-1.48437	0.407924		4.70203	0.250244
	-1.4851	0.407924		4.69774	0.210571
	-1.48581	0.404685		4.69347	0.180054
	-1.48652	0.400698		4.68923	0.167847
	-1.48723	0.399203		4.68501	0.213623
	-1.48793	0.400698		4.68082	0.253296
	-1.48862	0.404685		4.67665	0.268555
	-1.48931	0.402442		4.6725	0.241089
	-1.49	0.403439		4.66838	0.244141
	-1.49068	0.407924		4.66428	0.177002
	-1.49135	0.40917		4.6602	0.115967
	-1.49202	0.407675		4.65615	0.167847
	-1.49269	0.407924		4.65213	0.17395
	-1.49335	0.411413		4.64812	0.140381
	-1.49401	0.415649		4.64415	0.134277
	-1.49467	0.420135		4.64019	0.143433
	-1.49532	0.420135		4.63627	0.152588
	-1.49596	0.415898		4.63236	0.143433
	-1.4966	0.420384		4.62849	0.131226
	-1.49724	0.418889		4.62464	0.167847
	-1.49787	0.420882		4.62081	0.192261
	-1.4985	0.419387		4.61701	0.161743
	-1.49913	0.420135		4.61324	0.131226
	-1.49975	0.422128		4.6095	0.12207
	-1.50037	0.421131		4.60578	0.134277
	-1.50099	0.421131		4.60209	0.195312
	-1.5016	0.419885		4.59843	0.22583
	-1.50221	0.416895		4.59479	0.210571
	-1.50281	0.41839		4.59119	0.222778
	-1.50341	0.418889		4.58761	0.280762
	-1.50401	0.421131		4.58407	0.308228
	-1.50461	0.421381		4.58055	0.283813
	-1.5052	0.42462		4.57706	0.265503
	-1.50579	0.427112		4.5736	0.271606
	-1.50638	0.426115		4.57017	0.305176
	-1.50696	0.427112		4.56677	0.357056
	-1.50755	0.430102		4.5634	0.357056
	-1.50813	0.430351		4.56006	0.366211
	-1.5087	0.429105		4.55676	0.332642
	-1.50928	0.429853		4.55348	0.344849
	-1.50985	0.428358		4.55024	0.39978
	-1.51042	0.428607		4.54702	0.396729
	-1.51099	0.425118		4.54385	0.375366
	-1.51156	0.423623		4.5407	0.393677
	-1.51212	0.422128		4.53759	0.427246
	-1.51268	0.420882		4.53451	0.369263
	-1.51324	0.421879		4.53147	0.375366
	-1.5138	0.418889		4.52846	0.402832
	-1.51436	0.416148		4.52548	0.393677
	-1.51491	0.416895		4.52255	0.402832
	-1.51547	0.417144		4.51964	0.360107
	-1.51602	0.417144		4.51678	0.292969
	-1.51657	0.414403		4.51395	0.280762
	-1.51712	0.414902		4.51116	0.280762
	-1.51766	0.417892		4.50841	0.283813
	-1.51821	0.417144		4.50569	0.317383
	-1.51875	0.414902		4.50302	0.326538
	-1.5193	0.416148		4.50038	0.283813
	-1.51984	0.416148		4.49778	0.292969
	-1.52038	0.418639		4.49522	0.286865
	-1.52092	0.417643		4.4927	0.387573
	-1.52146	0.418889		4.49022	0.445557
	-1.52199	0.417892		4.48778	0.430298
	-1.52253	0.416148		4.48537	0.473022
	-1.52306	0.417144		4.48301	0.448608
	-1.5236	0.417643		4.48069	0.427246
	-1.52413	0.416895		4.47841	0.411987
	-1.52466	0.415898		4.42855	0.375366
	-1.5252	0.41839		4.42635	0.448608
	-1.52573	0.417144		4.42419	0.415039
	-1.52626	0.416148		4.42207	0.350952
	-1.52679	0.420135		4.42	0.280762
	-1.52731	0.42163		4.41796	0.274658
	-1.52784	0.422876		4.41597	0.265503
	-1.52837	0.42462		4.3664	0.265503
	-1.52889	0.419885		4.3645	0.344849
	-1.52942	0.416148		4.36263	0.411987
	-1.52994	0.413656		4.45605	0.402832
	-1.53047	0.417393		4.45427	0.366211
	-1.53099	0.423623		4.45253	0.375366
	-1.53151	0.427112		4.45084	0.430298
	-1.53203	0.423623		4.44918	0.436401
	-1.53255	0.416646		4.44757	0.448608
	-1.53307	0.417144		4.446	0.436401
	-1.53359	0.418639		4.44448	0.424194
	-1.53411	0.4154		4.44299	0.390625
	-1.53462	0.410915		4.44154	0.366211
	-1.53514	0.414902		4.44014	0.360107
	-1.53566	0.419138		4.43878	0.372314
	-1.53617	0.426613		4.43745	0.405884
	-1.53668	0.426364		4.43617	0.387573
	-1.53719	0.427361		4.3873	0.335693
	-1.5377	0.426613		4.3861	0.280762
	-1.53821	0.430102		4.38493	0.256348
	-1.53872	0.427859		4.38381	0.314331
	-1.53923	0.430601		4.38272	0.335693
	-1.53973	0.425617		4.38167	0.372314
	-1.54024	0.425118		4.38066	0.314331
	-1.54074	0.425118		4.37968	0.302124
	-1.54124	0.425617		4.37875	0.311279
	-1.54174	0.426115		4.37785	0.323486
	-1.54224	0.425118		4.37699	0.396729
	-1.54274	0.425118		4.37616	0.427246
	-1.54323	0.426364		4.37537	0.363159
	-1.54373	0.429105		4.37462	0.341797
	-1.54422	0.429105		4.3739	0.372314
	-1.54471	0.428358		4.37322	0.344849
	-1.54519	0.42462		4.32495	0.32959
	-1.54568	0.42761		4.32433	0.314331
	-1.54616	0.429355		4.32375	0.296021
	-1.54665	0.424869		4.3232	0.326538
	-1.54713	0.423374		4.32268	0.390625
	-1.5476	0.419636		4.3222	0.402832
	-1.54808	0.417643		4.32175	0.436401
	-1.54855	0.413905		4.32132	0.415039
	-1.54903	0.414902		4.32093	0.363159
	-1.54949	0.412908		4.32057	0.3479
	-1.54996	0.415898		4.32023	0.39978
	-1.55043	0.418141		4.31993	0.454712
	-1.55089	0.414652		4.31966	0.509644
	-1.55135	0.413406		4.31941	0.524902
	-1.55181	0.415898		4.31919	0.497437
	-1.55227	0.416397		4.319	0.488281
	-1.55272	0.416895		4.31884	0.45166
	-1.55317	0.416148		4.3187	0.442505
	-1.55362	0.417643		4.31859	0.411987
	-1.55407	0.41839		4.31851	0.369263
	-1.55451	0.414154		4.31845	0.424194
	-1.55495	0.416646		4.31842	0.488281
	-1.55539	0.411662		4.31841	0.48523
	-1.55583	0.409918		4.31842	0.436401
	-1.55626	0.410665		4.31846	0.418091
	-1.55669	0.407924		4.31851	0.469971
	-1.55712	0.404934		4.31859	0.457764
	-1.55755	0.408423		4.3187	0.479126
	-1.55797	0.414154		4.31882	0.460815
	-1.55839	0.417643		4.31896	0.43335
	-1.55881	0.414902		4.31912	0.402832
	-1.55922	0.416895		4.31929	0.393677
	-1.55964	0.422377		4.31949	0.369263
	-1.56004	0.425118		4.3197	0.320435
	-1.56045	0.421381		4.31993	0.32959
	-1.56086	0.419636		4.32018	0.250244
	-1.56126	0.418141		4.32044	0.241089
	-1.56165	0.419138		4.32071	0.244141
	-1.56205	0.422128		4.321	0.210571
	-1.56244	0.422876		4.32131	0.241089
	-1.56283	0.423374		4.32162	0.27771
	-1.56322	0.423872		4.32195	0.344849
	-1.5636	0.425617		4.32229	0.357056
	-1.56398	0.422128		4.32264	0.354004
	-1.56436	0.418889		4.32301	0.299072
	-1.56474	0.418141		4.27576	0.289917
	-1.56511	0.418639		4.27615	0.286865
	-1.56548	0.417643		4.27654	0.253296
	-1.56584	0.41839		4.27694	0.27771
	-1.56621	0.416397		4.27735	0.244141
	-1.56657	0.411413		4.27777	0.222778
	-1.56692	0.411662		4.27819	0.234985
	-1.56728	0.411911		4.27862	0.231934
	-1.56763	0.4154		4.27906	0.268555
	-1.56798	0.416895		4.2795	0.253296
	-1.56832	0.416148		4.27995	0.250244
	-1.56867	0.416895		4.2804	0.271606
	-1.56901	0.417393		4.28085	0.268555
	-1.56934	0.416397		4.28131	0.259399
	-1.56968	0.417643		4.28177	0.234985
	-1.57001	0.420384		4.28224	0.234985
	-1.57034	0.422128		4.2827	0.27771
	-1.57066	0.420135		4.28317	0.262451
	-1.57099	0.423125		4.28363	0.262451
	-1.57131	0.423374		4.2841	0.250244
	-1.57162	0.422626		4.26552	0.262451
	-1.57194	0.419885		4.26598	0.268555
	-1.57225	0.416895		4.26644	0.274658
	-1.57256	0.420384		4.26691	0.274658
	-1.57287	0.423623		4.26737	0.231934
	-1.57317	0.420384		4.26782	0.219727
	-1.57347	0.414403		4.26828	0.198364
	-1.57377	0.410167		4.26873	0.222778
	-1.57407	0.40917		4.2406	0.268555
	-1.57437	0.414902		4.24105	0.289917
	-1.57466	0.421131		4.24148	0.296021
	-1.57495	0.420882		4.24192	0.283813
	-1.57524	0.41839		4.24235	0.253296
	-1.57552	0.421131		4.24277	0.244141
	-1.57581	0.423125		4.24318	0.299072
	-1.57609	0.419636		4.24359	0.335693
	-1.57637	0.417144		4.244	0.393677
	-1.57664	0.422377		4.19677	0.411987
	-1.57692	0.425118		4.19716	0.405884
	-1.57719	0.426364		4.19754	0.408936
	-1.57746	0.428856		4.19791	0.366211
	-1.57773	0.42761		4.19827	0.27771
	-1.578	0.426613		4.19862	0.216675
	-1.57826	0.421879		4.19897	0.311279
	-1.57853	0.41839		4.1993	0.384521
	-1.57879	0.41839		4.19962	0.375366
	-1.57905	0.42163		4.19993	0.317383
	-1.57931	0.426115		4.18118	0.296021
	-1.57957	0.426613		4.1529	0.320435
	-1.57982	0.422626		4.15317	0.372314
	-1.58008	0.424122		4.15344	0.350952
	-1.58033	0.424869		4.10607	0.320435
	-1.58058	0.426364		4.1063	0.274658
	-1.58083	0.425866		4.10653	0.314331
	-1.58108	0.422128		4.10673	0.317383
	-1.58132	0.417892		4.10693	0.308228
	-1.58157	0.41839		4.10711	0.323486
	-1.58181	0.418889		4.10727	0.299072
	-1.58206	0.423872		4.10742	0.265503
	-1.5823	0.425368		4.10755	0.22583
	-1.58254	0.424371		4.07909	0.262451
	-1.58278	0.416895		4.07919	0.335693
	-1.58302	0.411911		4.03165	0.372314
	-1.58326	0.412659		4.03171	0.344849
	-1.58349	0.415649		4.03175	0.280762
	-1.58373	0.416397		4.03178	0.305176
	-1.58397	0.41839		4.03179	0.314331
	-1.5842	0.421381		4.03177	0.357056
	-1.58444	0.421879		4.03174	0.390625
	-1.58467	0.424122		4.03169	0.299072
	-1.5849	0.425866		4.03162	0.228882
	-1.58513	0.42761		4.03153	0.231934
	-1.58537	0.424371		3.84094	0.234985
	-1.5856	0.422377		3.8408	0.250244
	-1.58583	0.421879		3.84064	0.299072
	-1.58606	0.421131		3.84047	0.335693
	-1.58629	0.42462		3.84027	0.372314
	-1.58652	0.425118		3.84004	0.402832
	-1.58676	0.422876		3.8398	0.402832
	-1.58699	0.423125		3.83953	0.378418
	-1.58722	0.417393		3.83924	0.375366
	-1.58745	0.410416		3.83892	0.323486
	-1.58768	0.413157		3.83858	0.289917
	-1.58791	0.418889		3.83822	0.283813
	-1.58814	0.420384		3.83783	0.335693
	-1.58838	0.422626		3.83742	0.323486
	-1.58861	0.424371		3.83698	0.280762
	-1.58884	0.428856		3.83652	0.244141
	-1.58907	0.429105		3.83603	0.259399
	-1.58931	0.423374		3.83551	0.314331
	-1.58954	0.422377		3.83497	0.372314
	-1.58977	0.425368		3.83441	0.387573
	-1.59001	0.43085		3.83382	0.344849
	-1.59024	0.430102		3.8332	0.363159
	-1.59048	0.433591		3.83255	0.372314
	-1.59071	0.434338		3.83188	0.350952
	-1.59095	0.43384		3.83119	0.369263
	-1.59119	0.435834		3.83046	0.350952
	-1.59142	0.434837		3.82972	0.32959
	-1.59166	0.433342		3.82894	0.335693
	-1.5919	0.432594		3.80909	0.363159
	-1.59214	0.43085		3.80827	0.338745
	-1.59238	0.428109		3.80741	0.320435
	-1.59262	0.429604		3.80653	0.360107
	-1.59286	0.433591		3.80563	0.372314
	-1.59311	0.429604		3.8047	0.396729
	-1.59335	0.428358		3.80374	0.344849
	-1.59359	0.430351		3.80276	0.3479
	-1.59384	0.433092		3.80176	0.311279
	-1.59409	0.438575		3.80073	0.299072
	-1.59434	0.436581		3.79967	0.363159
	-1.59458	0.429604		3.79859	0.375366
	-1.59483	0.426115		3.79749	0.460815
	-1.59509	0.425617		3.79636	0.479126
	-1.59534	0.426115		3.79521	0.491333
	-1.59559	0.424371		3.79403	0.512695
	-1.59585	0.42462		3.79284	0.473022
	-1.5961	0.427361		3.79162	0.48523
	-1.59636	0.425866		3.79038	0.506592
	-1.59662	0.426115		3.78912	0.506592
	-1.59688	0.42761		3.78783	0.50354
	-1.59714	0.433092		3.78653	0.48523
	-1.5974	0.432843		3.78521	0.454712
	-1.59766	0.425866		3.78387	0.390625
	-1.59793	0.420882		3.78251	0.3479
	-1.59819	0.419387		3.78113	0.384521
	-1.59846	0.416148		3.77974	0.408936
	-1.59873	0.418639		3.77832	0.448608
	-1.599	0.421879		3.7769	0.497437
	-1.59927	0.417892		3.77545	0.454712
	-1.59954	0.417144		3.77399	0.45166
	-1.59981	0.417643		3.77252	0.390625
	-1.60008	0.414154		3.77103	0.415039
	-1.60036	0.411911		3.76953	0.460815
	-1.60063	0.416895		3.76802	0.488281
	-1.60091	0.415898		3.76649	0.463867
	-1.60119	0.412908		3.76495	0.442505
	-1.60146	0.409419		3.7634	0.43335
	-1.60174	0.410665		3.76184	0.482178
	-1.60202	0.415151		3.76027	0.512695
	-1.6023	0.416646		3.75869	0.509644
	-1.60258	0.421131		3.7571	0.463867
	-1.60287	0.421131		3.7555	0.411987
	-1.60315	0.423125		3.7539	0.418091
	-1.60343	0.426863		3.75229	0.396729
	-1.60371	0.426115		3.75067	0.421143
	-1.604	0.419885		3.74904	0.38147
	-1.60428	0.414652		3.74741	0.341797
	-1.60457	0.412659		3.74577	0.390625
	-1.60485	0.412908		3.74413	0.402832
	-1.60514	0.41241		3.74248	0.405884
	-1.60542	0.416397		3.74083	0.369263
	-1.60571	0.416397		3.73918	0.332642
	-1.606	0.414652		3.73752	0.332642
	-1.60628	0.410167		3.73586	0.354004
	-1.60657	0.411413		3.73419	0.360107
	-1.60686	0.413656		3.73252	0.323486
	-1.60715	0.415151		3.73085	0.357056
	-1.60743	0.4154		3.72918	0.341797
	-1.60772	0.418639		3.72751	0.314331
	-1.60801	0.419636		3.72583	0.32959
	-1.6083	0.423623		3.72416	0.283813
	-1.60859	0.423623		3.72248	0.286865
	-1.60888	0.418639		3.7208	0.247192
	-1.60917	0.420882		3.71912	0.198364
	-1.60946	0.422876		3.71744	0.22583
	-1.60975	0.420882		3.71576	0.256348
	-1.61004	0.424371		3.71408	0.247192
	-1.61033	0.42462		3.7124	0.280762
	-1.61062	0.423374		3.71071	0.323486
	-1.61091	0.416895		3.70903	0.357056
	-1.6112	0.413406		3.70735	0.317383
	-1.61149	0.416646		3.70567	0.341797
	-1.61178	0.418141		3.70399	0.286865
	-1.61207	0.420135		3.70231	0.308228
	-1.61236	0.417393		3.70063	0.341797
	-1.61266	0.410167		3.69895	0.354004
	-1.61295	0.414403		3.69726	0.317383
	-1.61324	0.418639		3.69558	0.268555
	-1.61354	0.420135		3.6939	0.241089
	-1.61383	0.420633		3.69222	0.20752
	-1.61412	0.419885		3.69054	0.201416
	-1.61442	0.424122		3.68886	0.201416
	-1.61471	0.426613		3.68717	0.253296
	-1.61501	0.428109		3.68549	0.271606
	-1.6153	0.425368		3.68381	0.271606
	-1.6156	0.420633		3.68212	0.234985
	-1.61589	0.422626		3.68044	0.20752
	-1.61619	0.425118		3.67875	0.201416
	-1.61649	0.425118		3.67707	0.189209
	-1.61678	0.419138		3.67538	0.216675
	-1.61708	0.415898		3.67369	0.167847
	-1.61738	0.414652		3.672	0.195312
	-1.61768	0.411662		3.67031	0.289917
	-1.61797	0.413406		3.66862	0.323486
	-1.61827	0.414154		3.66692	0.338745
	-1.61857	0.412908		3.66523	0.320435
	-1.61887	0.407675		3.66353	0.262451
	-1.61917	0.410416		3.66184	0.216675
	-1.61947	0.411662		3.66014	0.189209
	-1.61977	0.409918		3.65844	0.228882
	-1.62007	0.409669		3.65673	0.265503
	-1.62037	0.411662		3.65503	0.308228
	-1.62067	0.413656		3.65333	0.320435
	-1.62097	0.416148		3.65162	0.350952
	-1.62127	0.415649		3.64991	0.442505
	-1.62157	0.410416		3.6482	0.436401
	-1.62187	0.405682		3.64648	0.430298
	-1.62217	0.40618		3.64477	0.387573
	-1.62248	0.405183		3.64305	0.326538
	-1.62278	0.408921		3.64133	0.363159
	-1.62308	0.412908		3.6396	0.396729
	-1.62338	0.415151		3.63788	0.372314
	-1.62369	0.41241		3.63615	0.317383
	-1.62399	0.413406		3.63441	0.311279
	-1.62429	0.417144		3.63268	0.311279
	-1.6246	0.416895		3.63094	0.314331
	-1.6249	0.41839		3.62919	0.317383
	-1.62521	0.422626		3.62744	0.305176
	-1.62551	0.42163		3.62569	0.268555
	-1.62582	0.416646		3.62394	0.20752
	-1.62612	0.410915		3.62218	0.22583
	-1.62643	0.411911		3.62041	0.244141
	-1.62673	0.414902		3.61864	0.271606
	-1.62704	0.411662		3.61687	0.314331
	-1.62735	0.407177		3.61509	0.320435
	-1.62766	0.404934		3.6133	0.299072
	-1.62796	0.40618		3.61151	0.256348
	-1.62827	0.407177		3.60972	0.234985
	-1.62858	0.409918		3.60791	0.335693
	-1.62889	0.413905		3.6061	0.387573
	-1.6292	0.413406		3.60429	0.363159
	-1.62951	0.412659		3.60246	0.311279
	-1.62982	0.414902		3.60063	0.238037
	-1.63014	0.414403		3.59879	0.186157
	-1.63045	0.412659		3.59695	0.20752
	-1.63076	0.411164		3.59509	0.228882
	-1.63107	0.41216		3.59322	0.247192
	-1.63139	0.410416		3.59135	0.204468
	-1.6317	0.407177		3.58947	0.152588
	-1.63202	0.404685		3.58757	0.20752
	-1.63233	0.405682		3.58567	0.20752
	-1.63265	0.410416		3.53614	0.253296
	-1.63297	0.412659		3.53421	0.231934
	-1.63329	0.413406		3.53227	0.22583
	-1.6336	0.413406		3.53033	0.247192
	-1.63392	0.417144		3.52837	0.204468
	-1.63424	0.419138		3.5264	0.204468
	-1.63456	0.420384		3.52442	0.22583
	-1.63488	0.416646		3.52242	0.244141
	-1.6352	0.415649		3.52042	0.271606
	-1.63552	0.41839		3.5184	0.192261
	-1.63585	0.4154		3.51637	0.183105
	-1.63617	0.4154		3.51433	0.146484
	-1.63649	0.416646		3.51228	0.137329
	-1.63682	0.419387		3.51021	0.177002
	-1.63714	0.421879		3.50813	0.222778
	-1.63747	0.423374		3.50604	0.20752
	-1.63779	0.419387		3.50393	0.201416
	-1.63812	0.414154		3.50182	0.186157
	-1.63845	0.416148		3.49969	0.180054
	-1.63877	0.419387		3.49754	0.219727
	-1.6391	0.422128		3.49538	0.259399
	-1.63943	0.424122		3.49321	0.20752
	-1.63976	0.423872		3.44341	0.170898
	-1.64009	0.420384		3.44122	0.216675
	-1.64042	0.421131		3.43901	0.271606
	-1.64075	0.423125		3.43679	0.311279
	-1.64108	0.424869		3.43455	0.292969
	-1.64141	0.425617		3.43231	0.299072
	-1.64174	0.425866		3.43005	0.308228
	-1.64208	0.424869		3.42778	0.344849
	-1.64241	0.425866		3.42549	0.271606
	-1.64274	0.423623		3.4232	0.256348
	-1.64307	0.417393		3.4209	0.262451
	-1.6434	0.41839		3.41858	0.305176
	-1.64374	0.423125		3.41626	0.317383
	-1.64407	0.423125		3.41392	0.375366
	-1.6444	0.425617		3.41158	0.43335
	-1.64473	0.425866		3.40922	0.457764
	-1.64507	0.425118		3.40686	0.369263
	-1.6454	0.424869		3.40449	0.366211
	-1.64573	0.42761		3.40211	0.354004
	-1.64606	0.428358		3.39972	0.341797
	-1.64639	0.423872		3.39733	0.38147
	-1.64672	0.418639		3.39493	0.405884
	-1.64705	0.419636		3.39252	0.424194
	-1.64738	0.424371		3.39011	0.439453
	-1.6477	0.425118		3.38769	0.463867
	-1.64803	0.419387		3.38527	0.482178
	-1.64836	0.417643		3.38284	0.460815
	-1.64868	0.420882		3.38041	0.466919
	-1.64901	0.42163		3.37798	0.469971
	-1.64933	0.422626		3.37555	0.439453
	-1.64965	0.423374		3.37311	0.494385
	-1.64997	0.426115		3.37068	0.558472
	-1.65029	0.426115		3.36824	0.500488
	-1.65061	0.422876		3.36581	0.476074
	-1.65092	0.423872		3.36337	0.439453
	-1.65124	0.426115		3.36094	0.402832
	-1.65155	0.423374		3.35851	0.415039
	-1.65187	0.421131		3.35608	0.430298
	-1.65218	0.419885		3.35366	0.405884
	-1.65249	0.419138		3.35124	0.372314
	-1.6528	0.418889		3.34883	0.405884
	-1.6531	0.417643		3.34642	0.396729
	-1.65341	0.41839		3.34401	0.387573
	-1.65371	0.422128		3.34162	0.378418
	-1.65402	0.424122		3.33923	0.320435
	-1.65432	0.427112		3.33684	0.344849
	-1.65462	0.425118		3.33447	0.402832
	-1.65492	0.419885		3.3321	0.436401
	-1.65522	0.416646		3.32975	0.363159
	-1.65552	0.416646		3.30835	0.350952
	-1.65581	0.415649		3.27744	0.354004
	-1.65611	0.414652		3.27511	0.326538
	-1.65641	0.413157		3.2728	0.384521
	-1.6567	0.41216		3.27049	0.469971
	-1.657	0.414652		3.2682	0.476074
	-1.65729	0.414652		3.26592	0.445557
	-1.65758	0.41241		3.26364	0.405884
	-1.65788	0.405682		3.26139	0.363159
	-1.65817	0.403688		3.25914	0.357056
	-1.65846	0.406429		3.25691	0.363159
	-1.65875	0.410915		3.25469	0.366211
	-1.65905	0.41241		3.25249	0.402832
	-1.65934	0.413157		3.2503	0.378418
	-1.65963	0.412908		3.24813	0.369263
	-1.65993	0.411164		3.24597	0.384521
	-1.66022	0.409419		3.24382	0.341797
	-1.66052	0.411164		3.24169	0.323486
	-1.66082	0.413157		3.23958	0.341797
	-1.66111	0.413905		3.23748	0.387573
	-1.66141	0.414902		3.23539	0.375366
	-1.66171	0.413157		3.23332	0.421143
	-1.66201	0.408173		3.23127	0.460815
	-1.66232	0.403937		3.22923	0.436401
	-1.66262	0.403688		3.22721	0.408936
	-1.66293	0.403937		3.22521	0.372314
	-1.66324	0.401196		3.22322	0.393677
	-1.66355	0.396212		3.22125	0.408936
	-1.66386	0.39397		3.21929	0.442505
	-1.66418	0.39696		3.21736	0.424194
	-1.6645	0.399203		3.21543	0.335693
	-1.66482	0.402442		3.21353	0.292969
	-1.66514	0.400947		3.21164	0.289917
	-1.66547	0.40294		3.20977	0.271606
	-1.6658	0.405682		3.20792	0.201416
	-1.66613	0.403937		3.20609	0.186157
	-1.66646	0.40294		3.20427	0.192261
	-1.6668	0.406678		3.20247	0.20752
	-1.66714	0.411911		3.20069	0.186157
	-1.66749	0.413406		3.19893	0.198364
	-1.66784	0.413157		3.19719	0.201416
	-1.66819	0.411413		3.19546	0.259399
	-1.66855	0.411662		3.19376	0.292969
	-1.66891	0.414154		3.19207	0.262451
	-1.66927	0.418889		3.1904	0.27771
	-1.66964	0.417144		3.18875	0.27771
	-1.67002	0.413905		3.18712	0.283813
	-1.6704	0.416646		3.18551	0.271606
	-1.67078	0.42163		3.18392	0.244141
	-1.67117	0.420384		3.18234	0.231934
	-1.67156	0.416895		3.18079	0.204468
	-1.67196	0.412908		3.17925	0.210571
	-1.67237	0.411662		3.17773	0.20752
	-1.67278	0.415898		3.17624	0.183105
	-1.67319	0.42163		3.17476	0.234985
	-1.67361	0.422626		3.1733	0.262451
	-1.67404	0.418889		3.17185	0.274658
	-1.67448	0.413406		3.17043	0.262451
	-1.67492	0.410416		3.16903	0.238037
	-1.67536	0.409918		3.16764	0.180054
	-1.67581	0.41216		3.16627	0.143433
	-1.67627	0.4154		3.16492	0.170898
	-1.67674	0.416148		3.16358	0.201416
	-1.67721	0.414902		3.16227	0.201416
	-1.67769	0.412908		3.16097	0.20752
	-1.67818	0.417393		3.15969	0.201416
	-1.67868	0.42462		3.15842	0.216675
	-1.67918	0.428358		3.15717	0.259399
	-1.67969	0.431348		3.15593	0.259399
	-1.6802	0.425617		3.15471	0.238037
	-1.68073	0.420135		3.15351	0.20752
	-1.68126	0.420882		3.15232	0.213623
	-1.6818	0.422876		3.15114	0.231934
	-1.68235	0.422876		3.14997	0.292969
	-1.68291	0.418141		3.14882	0.357056
	-1.68347	0.419387		3.14769	0.357056
	-1.68404	0.420135		3.14656	0.372314
	-1.68462	0.417393		3.14544	0.350952
	-1.68521	0.416895		3.14434	0.354004
	-1.68581	0.416895		3.14325	0.418091
	-1.68641	0.416148		3.14217	0.442505
	-1.68702	0.415898		3.1411	0.457764
	-1.68764	0.414902		3.14004	0.424194
	-1.68827	0.414652		3.13898	0.344849
	-1.68891	0.4154		3.13794	0.344849
	-1.68956	0.411911		3.13691	0.393677
	-1.69021	0.415151		3.13588	0.405884
	-1.69087	0.419138		3.13486	0.38147
	-1.69155	0.421131		3.13385	0.387573
	-1.69223	0.425118		3.13285	0.332642
	-1.69291	0.423125		3.13185	0.326538
	-1.69361	0.419387		3.13086	0.335693
	-1.69431	0.416895		3.12987	0.299072
	-1.69503	0.414403		3.12889	0.308228
	-1.69575	0.414902		3.12792	0.326538
	-1.69648	0.415898		3.12695	0.323486
	-1.69721	0.410665		3.12598	0.387573
	-1.69796	0.413157		3.12502	0.402832
	-1.69871	0.413905		3.12406	0.436401
	-1.69948	0.414902		3.12311	0.466919
	-1.70025	0.413905		3.12215	0.460815
	-1.70103	0.41216		3.1212	0.415039
	-1.70181	0.408672		3.12025	0.421143
	-1.70261	0.411413		3.11931	0.457764
	-1.70341	0.411662		3.11836	0.445557
	-1.70423	0.408921		3.11742	0.408936
	-1.70505	0.412659		3.11648	0.402832
	-1.70587	0.415898		3.11554	0.415039
	-1.70671	0.418639		3.1146	0.320435
	-1.70755	0.415898		3.11366	0.250244
	-1.7084	0.415898		3.11272	0.308228
	-1.70926	0.420633		3.11179	0.302124
	-1.71013	0.42163		3.11085	0.259399
	-1.71101	0.421381		3.10991	0.247192
	-1.71189	0.419387		3.10898	0.271606
	-1.71278	0.417144		3.10804	0.27771
	-1.71368	0.417892		3.1071	0.314331
	-1.71458	0.422128		3.10617	0.384521
	-1.7155	0.421381		3.10523	0.38147
	-1.71642	0.413905		3.10429	0.39978
	-1.71735	0.415151		3.10335	0.411987
	-1.71828	0.418141		3.1024	0.354004
	-1.71922	0.424122		3.10146	0.335693
	-1.72017	0.426863		3.10051	0.387573
	-1.72113	0.428856		3.09957	0.387573
	-1.7221	0.429604		3.09862	0.32959
	-1.72307	0.424122		3.09766	0.344849
	-1.72405	0.423125		3.09671	0.332642
	-1.72503	0.425617		3.09575	0.323486
	-1.72602	0.426115		3.09479	0.292969
	-1.72702	0.43085		3.09383	0.253296
	-1.72802	0.432594		3.09286	0.262451
	-1.72904	0.427112		3.0919	0.289917
	-1.73005	0.423872		3.09093	0.280762
	-1.73108	0.424869		3.08995	0.326538
	-1.73211	0.423872		3.08898	0.317383
	-1.73315	0.425118		3.088	0.314331
	-1.73419	0.425368		3.08702	0.308228
	-1.73524	0.421879		3.08603	0.283813
	-1.73629	0.420633		3.08504	0.247192
	-1.73735	0.422626		3.08405	0.253296
	-1.73842	0.425368		3.08306	0.268555
	-1.73949	0.426115		3.08206	0.228882
	-1.74057	0.426364		3.08106	0.311279
	-1.74166	0.427859		3.08006	0.384521
	-1.74275	0.425118		3.07905	0.408936
	-1.74384	0.426115		3.07804	0.424194
	-1.74494	0.425368		3.07703	0.427246
	-1.74605	0.422377		3.07601	0.369263
	-1.74716	0.423623		3.07499	0.341797
	-1.74828	0.428856		3.07397	0.378418
	-1.7494	0.425866		3.07295	0.363159
	-1.75053	0.426115		3.07192	0.384521
	-1.75166	0.427361		3.07089	0.454712
	-1.7528	0.426115		3.06985	0.479126
	-1.75394	0.421879		3.06881	0.482178
	-1.75508	0.421879		3.06777	0.494385
	-1.75624	0.423623		3.06673	0.500488
	-1.75739	0.427361		3.06569	0.48523
	-1.75855	0.426115		3.06464	0.439453
	-1.75972	0.421131		3.06359	0.436401
	-1.76089	0.419138		3.06254	0.466919
	-1.76207	0.417144		3.06149	0.415039
	-1.76324	0.415649		3.06043	0.375366
	-1.76443	0.418141		3.05937	0.408936
	-1.76562	0.421131		3.05831	0.390625
	-1.76681	0.421131		3.05725	0.375366
	-1.768	0.421879		3.05619	0.390625
	-1.7692	0.416646		3.05513	0.430298
	-1.77041	0.410665		3.05406	0.442505
	-1.77162	0.409918		3.053	0.408936
	-1.77283	0.407924		3.00431	0.405884
	-1.77404	0.410416		3.00324	0.460815
	-1.77526	0.413656		3.00217	0.43335
	-1.77648	0.416148		3.00111	0.360107
	-1.77771	0.414403		3.00004	0.335693
	-1.77894	0.415649		2.99897	0.32959
	-1.78017	0.418141		2.9979	0.286865
	-1.78141	0.418639		2.99683	0.314331
	-1.78264	0.417892		2.99577	0.283813
	-1.78389	0.414902		2.9947	0.253296
	-1.78513	0.411164		2.99364	0.250244
	-1.78638	0.411911		2.99257	0.265503
	-1.78763	0.41839		2.99151	0.302124
	-1.78888	0.418141		2.99046	0.320435
	-1.79013	0.412659		2.9894	0.32959
	-1.79139	0.413157		2.94073	0.308228
	-1.79265	0.414902		2.93968	0.265503
	-1.79391	0.411413		2.93863	0.253296
	-1.79517	0.407426		2.93758	0.280762
	-1.79643	0.411662		2.93654	0.299072
	-1.7977	0.417144		2.93551	0.256348
	-1.79896	0.419636		2.93448	0.289917
	-1.80023	0.417643		2.93345	0.268555
	-1.8015	0.421381		2.93242	0.311279
	-1.80277	0.425118		2.9314	0.350952
	-1.80405	0.418141		2.93039	0.341797
	-1.80532	0.412659		2.92938	0.354004
	-1.8066	0.416148		2.92838	0.396729
	-1.80787	0.420633		2.92738	0.384521
	-1.80915	0.423872		2.92638	0.378418
	-1.81043	0.426115		2.9254	0.360107
	-1.8117	0.424122		2.92441	0.332642
	-1.81298	0.425866		2.92344	0.320435
	-1.81426	0.427859		2.92247	0.317383
	-1.81554	0.427112		2.9215	0.262451
	-1.81682	0.425617		2.92054	0.20752
	-1.8181	0.416646		2.91959	0.20752
	-1.81938	0.416895		2.91865	0.253296
	-1.82066	0.419885		2.91771	0.262451
	-1.82194	0.422128		2.91678	0.244141
	-1.82322	0.421879		2.91585	0.234985
	-1.8245	0.418889		2.91494	0.268555
	-1.82578	0.417144		2.91402	0.238037
	-1.82705	0.419387		2.91312	0.219727
	-1.82833	0.420135		2.91222	0.186157
	-1.82961	0.419138		2.91133	0.201416
	-1.83089	0.42163		2.91045	0.268555
	-1.83216	0.419387		2.90957	0.302124
	-1.83344	0.416397		2.90869	0.311279
	-1.83471	0.418141		2.90783	0.317383
	-1.83599	0.41839		2.90696	0.323486
	-1.83726	0.41839		2.90611	0.314331
	-1.83853	0.420384		2.90526	0.280762
	-1.8398	0.418639		2.90441	0.253296
	-1.84107	0.415898		2.90357	0.280762
	-1.84234	0.415649		2.90273	0.302124
	-1.84361	0.414652		2.9019	0.332642
	-1.84487	0.413406		2.90107	0.369263
	-1.84614	0.415649		2.90024	0.366211
	-1.8474	0.417892		2.89942	0.360107
	-1.84866	0.42462		2.8986	0.360107
	-1.84991	0.425617		2.89779	0.32959
	-1.85117	0.421381		2.89698	0.378418
	-1.85242	0.416397		2.89617	0.369263
	-1.85367	0.415649		2.89536	0.350952
	-1.85492	0.417643		2.89456	0.360107
	-1.85616	0.421879		2.89375	0.387573
	-1.8574	0.424122		2.89295	0.43335
	-1.85864	0.427361		2.89215	0.378418
	-1.85987	0.424122		2.89136	0.323486
	-1.86111	0.423374		2.89056	0.354004
	-1.86233	0.428109		2.88976	0.338745
	-1.86356	0.431099		2.88897	0.326538
	-1.86478	0.426115		2.88817	0.323486
	-1.866	0.423872		2.88738	0.335693
	-1.86721	0.422128		2.88659	0.3479
	-1.86842	0.420882		2.88579	0.283813
	-1.86962	0.423374		2.885	0.231934
	-1.87082	0.424122		2.8842	0.311279
	-1.87202	0.421131		2.8834	0.38147
	-1.87321	0.418141		2.88261	0.354004
	-1.87439	0.41839		2.88181	0.375366
	-1.87557	0.416397		2.88101	0.39978
	-1.87675	0.416895		2.8802	0.408936
	-1.87792	0.415898		2.8794	0.39978
	-1.87908	0.415649		2.87859	0.38147
	-1.88024	0.415151		2.87779	0.363159
	-1.8814	0.417643		2.87698	0.308228
	-1.88255	0.419636		2.87616	0.286865
	-1.88369	0.417892		2.87535	0.289917
	-1.88482	0.417892		2.87453	0.280762
	-1.88595	0.419885		2.87371	0.305176
	-1.88708	0.423623		2.87289	0.354004
	-1.8882	0.423872		2.87206	0.317383
	-1.88931	0.429355		2.87123	0.265503
	-1.89041	0.427361		2.8704	0.238037
	-1.89151	0.420633		2.86956	0.253296
	-1.8926	0.415649		2.86872	0.265503
	-1.89368	0.418141		2.86787	0.247192
	-1.89476	0.418639		2.86702	0.222778
	-1.89583	0.419636		2.86617	0.137329
	-1.89689	0.422626		2.86531	0.134277
	-1.89794	0.425617		2.86445	0.210571
	-1.89899	0.429853		2.86359	0.247192
	-1.90003	0.429105		2.86272	0.241089
	-1.90106	0.431847		2.86184	0.219727
	-1.90209	0.431597		2.86096	0.253296
	-1.9031	0.427859		2.86008	0.296021
	-1.90411	0.427112		2.85919	0.326538
	-1.90511	0.433342		2.8583	0.326538
	-1.9061	0.439073		2.8574	0.317383
	-1.90708	0.436581		2.8565	0.3479
	-1.90806	0.43683		2.8556	0.375366
	-1.90902	0.436581		2.85469	0.427246
	-1.90998	0.435584		2.85378	0.430298
	-1.91093	0.433342		2.85286	0.378418
	-1.91187	0.434089		2.85194	0.375366
	-1.9128	0.436581		2.85101	0.369263
	-1.91373	0.438076		2.85008	0.405884
	-1.91464	0.434588		2.84915	0.445557
	-1.91555	0.432345		2.84822	0.463867
	-1.91645	0.431597		2.84728	0.439453
	-1.91733	0.428109		2.84634	0.390625
	-1.91821	0.426364		2.84539	0.396729
	-1.91909	0.42462		2.84445	0.408936
	-1.91995	0.423374		2.8435	0.366211
	-1.9208	0.425368		2.84255	0.280762
	-1.92165	0.424869		2.84159	0.320435
	-1.92248	0.424869		2.84064	0.372314
	-1.92331	0.42163		2.83968	0.43335
	-1.92413	0.416895		2.83872	0.473022
	-1.92494	0.418141		2.83776	0.466919
	-1.92574	0.416148		2.8368	0.476074
	-1.92653	0.417144		2.83584	0.515747
	-1.92732	0.422876		2.83487	0.524902
	-1.92809	0.423623		2.83391	0.473022
	-1.92886	0.427361		2.78532	0.494385
	-1.92961	0.427361		2.78436	0.488281
	-1.93036	0.429355		2.78339	0.537109
	-1.9311	0.428856		2.78243	0.570679
	-1.93183	0.427859		2.78146	0.540161
	-1.93255	0.424371		2.7805	0.531006
	-1.93327	0.418141		2.77954	0.515747
	-1.93397	0.418141		2.77857	0.497437
	-1.93467	0.424122		2.77761	0.50354
	-1.93535	0.419885		2.77665	0.527954
	-1.93603	0.416895		2.77569	0.500488
	-1.9367	0.414154		2.77473	0.463867
	-1.93736	0.415898		2.77377	0.48523
	-1.93801	0.415649		2.77281	0.494385
	-1.93866	0.408921		2.77185	0.442505
	-1.93929	0.406678		2.7709	0.457764
	-1.93992	0.410665		2.76994	0.445557
	-1.94053	0.418141		2.76899	0.396729
	-1.94114	0.416646		2.76804	0.372314
	-1.94174	0.413905		2.76709	0.418091
	-1.94233	0.41839		2.76614	0.45166
	-1.94291	0.425118		2.76519	0.460815
	-1.94349	0.424869		2.76425	0.402832
	-1.94405	0.421381		2.7633	0.357056
	-1.94461	0.42163		2.76236	0.341797
	-1.94515	0.422876		2.76141	0.283813
	-1.94569	0.421131		2.76047	0.259399
	-1.94622	0.420882		2.75953	0.265503
	-1.94674	0.41839		2.75859	0.314331
	-1.94725	0.417393		2.75765	0.305176
	-1.94775	0.418141		2.75671	0.296021
	-1.94825	0.414403		2.75577	0.283813
	-1.94873	0.40319		2.75484	0.262451
	-1.94921	0.406429		2.7539	0.247192
	-1.94967	0.410416		2.75296	0.216675
	-1.95013	0.412659		2.75203	0.268555
	-1.95058	0.416397		2.75109	0.253296
	-1.95102	0.419387		2.75015	0.210571
	-1.95145	0.414902		2.74922	0.241089
	-1.95188	0.411911		2.74828	0.244141
	-1.95229	0.41839		2.74734	0.314331
	-1.9527	0.422876		2.74639	0.265503
	-1.9531	0.421879		2.74545	0.234985
	-1.95348	0.424122		2.7445	0.177002
	-1.95386	0.425118		2.74355	0.195312
	-1.95424	0.424869		2.7426	0.195312
	-1.9546	0.424371		2.74165	0.231934
	-1.95495	0.419885		2.74069	0.222778
	-1.9553	0.418141		2.73973	0.302124
	-1.95564	0.419138		2.73876	0.317383
	-1.95597	0.415649		2.73779	0.274658
	-1.95629	0.414652		2.73682	0.335693
	-1.9566	0.413656		2.73584	0.323486
	-1.95691	0.414154		2.73486	0.292969
	-1.95721	0.417643		2.73387	0.314331
	-1.9575	0.418889		2.73287	0.280762
	-1.95778	0.417643		2.73187	0.326538
	-1.95805	0.423872		2.73087	0.341797
	-1.95832	0.42761		2.72985	0.317383
	-1.95858	0.422377		2.72883	0.231934
	-1.95883	0.422377		2.7278	0.228882
	-1.95907	0.42462		2.72677	0.280762
	-1.95931	0.423872		2.72572	0.308228
	-1.95954	0.425617		2.72467	0.299072
	-1.95976	0.420882		2.7236	0.274658
	-1.95997	0.4154		2.72253	0.289917
	-1.96018	0.414403		2.72145	0.332642
	-1.96038	0.413406		2.72036	0.341797
	-1.96057	0.41241		2.71926	0.323486
	-1.96076	0.413406		2.71814	0.3479
	-1.96094	0.41241		2.71702	0.369263
	-1.96111	0.411413		2.71589	0.344849
	-1.96128	0.409669		2.71474	0.311279
	-1.96143	0.406429		2.71358	0.369263
	-1.96158	0.405931		2.71241	0.363159
	-1.96173	0.405432		2.71123	0.408936
	-1.96187	0.411662		2.71003	0.402832
	-1.962	0.417144		2.70883	0.323486
	-1.96212	0.419636		2.70761	0.308228
	-1.96224	0.416397		2.70638	0.259399
	-1.96235	0.41241		2.70513	0.253296
	-1.96246	0.41241		2.70387	0.32959
	-1.96256	0.414154		2.7026	0.372314
	-1.96265	0.416646		2.70131	0.292969
	-1.96274	0.417144		2.70001	0.213623
	-1.96282	0.417643		2.6987	0.228882
	-1.96289	0.420882		2.69738	0.292969
	-1.96296	0.426364		2.69604	0.305176
	-1.96302	0.427859		2.69468	0.280762
	-1.96308	0.42462		2.69332	0.265503
	-1.96313	0.424869		2.69193	0.259399
	-1.96318	0.42462		2.69054	0.274658
	-1.96322	0.425617		2.68913	0.283813
	-1.96325	0.42761		2.6877	0.299072
	-1.96328	0.422128		2.68627	0.314331
	-1.96331	0.421879		2.68481	0.302124
	-1.96333	0.421879		2.68335	0.259399
	-1.96334	0.420384		2.68187	0.283813
	-1.96335	0.417393		2.68037	0.286865
	-1.96335	0.417393		2.67886	0.268555
	-1.96335	0.416895		2.67734	0.192261
	-1.96335	0.416148		2.6758	0.128174
	-1.96334	0.417393		2.67425	0.167847
	-1.96332	0.414154		2.67268	0.198364
	-1.9633	0.410665		2.6711	0.244141
	-1.96328	0.405432		2.66951	0.238037
	-1.96325	0.406927		2.6679	0.228882
	-1.96322	0.409419		2.66628	0.234985
	-1.96318	0.411662		2.66464	0.228882
	-1.96314	0.408672		2.66299	0.238037
	-1.9631	0.406429		2.66133	0.280762
	-1.96305	0.407675		2.65965	0.311279
	-1.963	0.407426		2.65795	0.323486
	-1.96295	0.403688		2.65624	0.302124
	-1.96289	0.404685		2.65451	0.296021
	-1.96283	0.406429		2.65277	0.302124
	-1.96276	0.409669		2.65102	0.289917
	-1.9627	0.411413		2.64924	0.262451
	-1.96262	0.41216		2.64746	0.253296
	-1.96255	0.41241		2.64565	0.265503
	-1.96247	0.408173		2.64383	0.286865
	-1.96239	0.410416		2.642	0.305176
	-1.96231	0.406678		2.64014	0.299072
	-1.96222	0.40917		2.63828	0.271606
	-1.96214	0.413905		2.63639	0.259399
	-1.96204	0.4154		2.63449	0.234985
	-1.96195	0.417144		2.63257	0.20752
	-1.96186	0.417892		2.63064	0.231934
	-1.96176	0.419885		2.62868	0.201416
	-1.96166	0.42163		2.62671	0.201416
	-1.96156	0.41839		2.62472	0.201416
	-1.96145	0.419138		2.62272	0.192261
	-1.96135	0.417393		2.62069	0.195312
	-1.96124	0.41839		2.61865	0.183105
	-1.96113	0.416646		2.61659	0.186157
	-1.96102	0.416646		2.61451	0.17395
	-1.9609	0.422876		2.61241	0.198364
	-1.96079	0.423374		2.61029	0.20752
	-1.96067	0.421879		2.60815	0.234985
	-1.96056	0.419138		2.60599	0.22583
	-1.96044	0.419636		2.60381	0.234985
	-1.96032	0.415649		2.60161	0.204468
	-1.9602	0.418889		2.59939	0.161743
	-1.96007	0.419885		2.59714	0.22583
	-1.95995	0.419138		2.59488	0.27771
	-1.95983	0.424122		2.59259	0.289917
	-1.9597	0.422128		2.59028	0.234985
	-1.95958	0.423872		2.58795	0.244141
	-1.95945	0.427361		2.58559	0.268555
	-1.95933	0.42761		2.58321	0.289917
	-1.9592	0.422626		2.58081	0.259399
	-1.95907	0.416397		2.57839	0.289917
	-1.95895	0.417144		2.57594	0.274658
	-1.95882	0.420135		2.57347	0.314331
	-1.95869	0.419138		2.57098	0.305176
	-1.95857	0.418639		2.56846	0.320435
	-1.95844	0.422626		2.56591	0.354004
	-1.95832	0.421879		2.56334	0.375366
	-1.95819	0.421131		2.56075	0.408936
	-1.95806	0.426115		2.55812	0.439453
	-1.95794	0.427859		2.55548	0.445557
	-1.95782	0.431847		2.5528	0.427246
	-1.95769	0.432096		2.5501	0.396729
	-1.95757	0.424869		2.54738	0.387573
	-1.95745	0.421381		2.54462	0.369263
	-1.95733	0.418639		2.54184	0.360107
	-1.95721	0.421381		2.53903	0.442505
	-1.95709	0.421131		2.53619	0.436401
	-1.95697	0.420384		2.53332	0.415039
	-1.95686	0.418889		2.53042	0.430298
	-1.95674	0.41839		2.52749	0.482178
	-1.95663	0.420633		2.52454	0.466919
	-1.95652	0.423872		2.52155	0.448608
	-1.9564	0.424122		2.51853	0.442505
	-1.95629	0.417643		2.51549	0.39978
	-1.95619	0.41839		2.51241	0.375366
	-1.95608	0.418141		2.50931	0.366211
	-1.95597	0.414652		2.50617	0.326538
	-1.95587	0.419387		2.503	0.308228
	-1.95577	0.422128		2.4998	0.320435
	-1.95566	0.421381		2.49657	0.305176
	-1.95556	0.417144		2.49331	0.360107
	-1.95547	0.418639		2.49002	0.424194
	-1.95537	0.420882		2.48669	0.402832
	-1.95527	0.421381		2.48334	0.396729
	-1.95518	0.423374		2.47995	0.369263
	-1.95509	0.418889		2.47653	0.350952
	-1.955	0.417643		2.47308	0.338745
	-1.95491	0.421131		2.4696	0.3479
	-1.95482	0.42163		2.46609	0.38147
	-1.95473	0.420882		2.46254	0.445557
	-1.95465	0.416895		2.45897	0.427246
	-1.95457	0.413656		2.45536	0.360107
	-1.95448	0.418141		2.45172	0.378418
	-1.9544	0.411413		2.44805	0.378418
	-1.95433	0.413157		2.44435	0.418091
	-1.95425	0.416397		2.44061	0.442505
	-1.95417	0.415898		2.43685	0.421143
	-1.9541	0.412659		2.43305	0.396729
	-1.95403	0.407924		2.42922	0.408936
	-1.95395	0.407177		2.42536	0.466919
	-1.95388	0.409419		2.42147	0.427246
	-1.95382	0.412659		2.41755	0.427246
	-1.95375	0.410915		2.4136	0.445557
	-1.95368	0.414403		2.40962	0.436401
	-1.95362	0.413905		2.40561	0.442505
	-1.95355	0.413656		2.40157	0.448608
	-1.95349	0.410915		2.39751	0.378418
	-1.95343	0.410915		2.39341	0.366211
	-1.95337	0.41216		2.38928	0.402832
	-1.95331	0.414403		2.38513	0.460815
	-1.95326	0.414902		2.38095	0.424194
	-1.9532	0.415649		2.37674	0.341797
	-1.95315	0.415151		2.3725	0.308228
	-1.95309	0.415649		2.36824	0.360107
	-1.95304	0.41216		2.36394	0.402832
	-1.95299	0.410167		2.35963	0.366211
	-1.95294	0.407924		2.35529	0.363159
	-1.95289	0.405682		2.35092	0.372314
	-1.95284	0.403439		2.34653	0.39978
	-1.95279	0.401695		2.34211	0.393677
	-1.95274	0.406678		2.33767	0.369263
	-1.9527	0.405682		2.33321	0.335693
	-1.95265	0.394966		2.32872	0.283813
	-1.95261	0.394717		2.32421	0.244141
	-1.95256	0.397209		2.31968	0.265503
	-1.95252	0.402193		2.31513	0.283813
	-1.95248	0.402193		2.31056	0.271606
	-1.95243	0.397209		2.30597	0.286865
	-1.95239	0.398953		2.30136	0.311279
	-1.95235	0.405183		2.29673	0.289917
	-1.95231	0.406927		2.29208	0.271606
	-1.95227	0.406927		2.28742	0.299072
	-1.95223	0.405183		2.28274	0.274658
	-1.9522	0.408173		2.27804	0.241089
	-1.95216	0.41241		2.27332	0.17395
	-1.95212	0.411911		2.26859	0.131226
	-1.95209	0.409669		2.26385	0.189209
	-1.95205	0.405931		2.25909	0.259399
	-1.95202	0.408672		2.25431	0.280762
	-1.95198	0.409918		2.24952	0.289917
	-1.95195	0.412659		2.24472	0.259399
	-1.95192	0.414154		2.23991	0.195312
	-1.95189	0.418639		2.23508	0.128174
	-1.95185	0.419885		2.23024	0.119019
	-1.95182	0.418141		2.22539	0.131226
	-1.9518	0.419138		2.22053	0.0793457
	-1.95177	0.419885		2.21566	0.143433
	-1.95174	0.41839		2.21078	0.219727
	-1.95171	0.414154		2.20589	0.137329
	-1.95169	0.41241		2.20099	0.0976562
	-1.95166	0.412908		2.19608	0.131226
	-1.95164	0.414403		2.19116	0.17395
	-1.95161	0.416148		2.18623	0.210571
	-1.95159	0.416148		2.1813	0.186157
	-1.95157	0.420135		2.17636	0.210571
	-1.95155	0.421879		2.17141	0.192261
	-1.95153	0.41839		2.16645	0.149536
	-1.95151	0.419885		2.16149	0.189209
	-1.95149	0.422128		2.15652	0.283813
	-1.95148	0.414403		2.15154	0.344849
	-1.95146	0.415898		2.14656	0.323486
	-1.95145	0.419387		2.14157	0.335693
	-1.95143	0.425866		2.13658	0.344849
	-1.95142	0.429105		2.13157	0.384521
	-1.95141	0.434089		2.12657	0.372314
	-1.9514	0.43384		2.12156	0.3479
	-1.95139	0.43085		2.11654	0.32959
	-1.95139	0.425368		2.11152	0.314331
	-1.95138	0.420633		2.10649	0.323486
	-1.95138	0.419138		2.10146	0.39978
	-1.95138	0.417892		2.09643	0.445557
	-1.95137	0.418639		2.09139	0.427246
	-1.95137	0.417144		2.08634	0.430298
	-1.95138	0.416895		2.08129	0.411987
	-1.95138	0.416646		2.07624	0.427246
	-1.95138	0.416646		2.07118	0.402832
	-1.95139	0.413905		2.06612	0.338745
	-1.95139	0.4154		2.06106	0.341797
	-1.9514	0.4154		2.05599	0.335693
	-1.95141	0.418889		2.05092	0.326538
	-1.95142	0.41839		2.04585	0.292969
	-1.95143	0.419885		2.04077	0.283813
	-1.95145	0.419636		2.0357	0.302124
	-1.95146	0.41839		2.03062	0.320435
	-1.95148	0.41839		2.02553	0.323486
	-1.9515	0.418141		2.02045	0.3479
	-1.95152	0.4154		2.01537	0.305176
	-1.95154	0.41216		2.01028	0.27771
	-1.95156	0.411164		2.00519	0.247192
	-1.95159	0.41216		2.0001	0.280762
	-1.95161	0.411413		1.99501	0.317383
	-1.95164	0.410665		1.98993	0.3479
	-1.95167	0.413656		1.98484	0.421143
	-1.9517	0.412659		1.97975	0.48523
	-1.95174	0.414652		1.97466	0.491333
	-1.95177	0.419885		1.96958	0.460815
	-1.95181	0.422128		1.96449	0.463867
	-1.95185	0.425368		1.95941	0.430298
	-1.95189	0.42462		1.95433	0.393677
	-1.95194	0.426863		1.94926	0.45166
	-1.95198	0.425617		1.94419	0.473022
	-1.95203	0.42163		1.93912	0.378418
	-1.95208	0.424869		1.93406	0.366211
	-1.95213	0.425118		1.929	0.39978
	-1.95219	0.424122		1.92395	0.39978
	-1.95224	0.423374		1.9189	0.460815
	-1.9523	0.421381		1.91386	0.436401
	-1.95236	0.414902		1.90883	0.43335
	-1.95243	0.414902		1.9038	0.45166
	-1.95249	0.417144		1.89878	0.482178
	-1.95256	0.419138		1.89378	0.476074
	-1.95263	0.420633		1.88878	0.421143
	-1.95271	0.422128		1.88379	0.369263
	-1.95278	0.42462		1.87881	0.311279
	-1.95286	0.425617		1.87384	0.311279
	-1.95294	0.424122		1.86888	0.27771
	-1.95303	0.420633		1.86393	0.268555
	-1.95312	0.421381		1.85899	0.286865
	-1.95321	0.420384		1.85407	0.311279
	-1.9533	0.419387		1.84916	0.335693
	-1.95339	0.421381		1.84426	0.338745
	-1.95349	0.427361		1.83938	0.311279
	-1.95359	0.426115		1.83451	0.271606
	-1.95369	0.424869		1.82965	0.250244
	-1.9538	0.424371		1.82482	0.326538
	-1.95391	0.420633		1.81999	0.402832
	-1.95402	0.423872		1.81519	0.38147
	-1.95414	0.425118		1.8104	0.323486
	-1.95425	0.428358		1.80562	0.274658
	-1.95437	0.429604		1.80087	0.262451
	-1.9545	0.426364		1.79613	0.27771
	-1.95462	0.420882		1.79142	0.253296
	-1.95475	0.421131		1.78672	0.259399
	-1.95488	0.421879		1.78204	0.32959
	-1.95502	0.421879		1.77739	0.357056
	-1.95516	0.421879		1.77275	0.344849
	-1.9553	0.421131		1.76814	0.326538
	-1.95544	0.422377		1.76355	0.366211
	-1.95559	0.423872		1.75898	0.408936
	-1.95574	0.425368		1.75444	0.411987
	-1.95589	0.426613		1.74992	0.418091
	-1.95605	0.422626		1.74542	0.427246
	-1.95621	0.423872		1.74095	0.45166
	-1.95637	0.427859		1.73651	0.476074
	-1.95654	0.428358		1.73209	0.445557
	-1.95671	0.425118		1.7277	0.366211
	-1.95689	0.425866		1.72333	0.39978
	-1.95706	0.429105		1.71899	0.457764
	-1.95724	0.424869		1.71468	0.479126
	-1.95743	0.423125		1.7104	0.497437
	-1.95761	0.421381		1.70615	0.537109
	-1.9578	0.425368		1.70193	0.543213
	-1.958	0.422626		1.69774	0.521851
	-1.95819	0.419885		1.69358	0.463867
	-1.95839	0.420633		1.68946	0.436401
	-1.9586	0.421381		1.68536	0.466919
	-1.9588	0.420135		1.6813	0.497437
	-1.95902	0.418141		1.67727	0.476074
	-1.95923	0.416646		1.67328	0.411987
	-1.95945	0.41241		1.66932	0.354004
	-1.95967	0.407177		1.66539	0.350952
	-1.9599	0.408423		1.6615	0.405884
	-1.96012	0.407924		1.65765	0.366211
	-1.96036	0.405183		1.65383	0.3479
	-1.96059	0.409918		1.65004	0.296021
	-1.96083	0.4154		1.6463	0.27771
	-1.96108	0.415151		1.64259	0.27771
	-1.96133	0.414403		1.63892	0.289917
	-1.96158	0.4154		1.63529	0.296021
	-1.96183	0.417643		1.6317	0.320435
	-1.96209	0.414652		1.62814	0.296021
	-1.96235	0.413157		1.62463	0.338745
	-1.96262	0.41216		1.62115	0.369263
	-1.96288	0.409918		1.61772	0.317383
	-1.96316	0.410915		1.61433	0.289917
	-1.96343	0.410416		1.61097	0.341797
	-1.96371	0.413656		1.60766	0.375366
	-1.96399	0.418141		1.60439	0.411987
	-1.96428	0.416397		1.60117	0.457764
	-1.96457	0.415649		1.59798	0.421143
	-1.96486	0.416895		1.59484	0.393677
	-1.96515	0.41839		1.59174	0.357056
	-1.96545	0.416646		1.58869	0.326538
	-1.96575	0.417144		1.58568	0.360107
	-1.96605	0.415151		1.58271	0.372314
	-1.96636	0.414902		1.57978	0.32959
	-1.96667	0.416148		1.5769	0.305176
	-1.96698	0.413157		1.57407	0.27771
	-1.9673	0.413406		1.57128	0.20752
	-1.96762	0.415649		1.56853	0.109863
	-1.96794	0.419636		1.56582	0.12207
	-1.96826	0.421131		1.56317	0.15564
	-1.96859	0.423872		1.56055	0.271606
	-1.96891	0.42163		1.55798	0.311279
	-1.96924	0.417393		1.55546	0.338745
	-1.96957	0.414154		1.55298	0.305176
	-1.96991	0.415649		1.55055	0.274658
	-1.97024	0.41839		1.54816	0.274658
	-1.97058	0.420882		1.54582	0.274658
	-1.97092	0.420135		1.54352	0.299072
	-1.97126	0.417643		1.54127	0.320435
	-1.9716	0.412659		1.53906	0.283813
	-1.97194	0.412908		1.5369	0.283813
	-1.97229	0.416646		1.53479	0.289917
	-1.97263	0.420633		1.53272	0.305176
	-1.97298	0.416646		1.5307	0.302124
	-1.97332	0.408921		1.52873	0.320435
	-1.97367	0.409918		1.5268	0.286865
	-1.97401	0.414154		1.52492	0.280762
	-1.97436	0.416646		1.52309	0.247192
	-1.97471	0.414652		1.5213	0.201416
	-1.97505	0.416895		1.51956	0.213623
	-1.9754	0.421131		1.51787	0.280762
	-1.97575	0.42462		1.51622	0.283813
	-1.97609	0.42462		1.51462	0.332642
	-1.97643	0.426115		1.51307	0.314331
	-1.97678	0.428856		1.51157	0.317383
	-1.97712	0.43384		1.51011	0.299072
	-1.97746	0.431348		1.5087	0.317383
	-1.9778	0.427112		1.50734	0.344849
	-1.97813	0.424869		1.50603	0.357056
	-1.97847	0.424869		1.50476	0.396729
	-1.9788	0.42462		1.50354	0.314331
	-1.97913	0.426115		1.50237	0.241089
	-1.97945	0.42462		1.50125	0.250244
	-1.97978	0.422876		1.50018	0.3479
	-1.9801	0.424869		1.49916	0.332642
	-1.98041	0.42761		1.49818	0.271606
	-1.98073	0.429105		1.49726	0.280762
	-1.98104	0.425118		1.49638	0.320435
	-1.98134	0.41839		1.49555	0.335693
	-1.98165	0.421381		1.49477	0.311279
	-1.98194	0.424371		1.49404	0.280762
	-1.98224	0.425118		1.49336	0.271606
	-1.98252	0.423374		1.49273	0.244141
	-1.98281	0.423125		1.49214	0.241089
	-1.98309	0.42462		1.49161	0.274658
	-1.98336	0.42462		1.49112	0.299072
	-1.98363	0.422876		1.49068	0.311279
	-1.98389	0.422377		1.49029	0.323486
	-1.98415	0.425368		1.48995	0.308228
	-1.9844	0.425617		1.48966	0.369263
	-1.98464	0.422876		1.48941	0.323486
	-1.98488	0.420135		1.48922	0.259399
	-1.98511	0.420135		1.48907	0.216675
	-1.98533	0.42163		1.48896	0.268555
	-1.98555	0.421879		1.48891	0.311279
	-1.98576	0.423872		1.4889	0.296021
	-1.98596	0.422377		1.48894	0.250244
	-1.98616	0.426115		1.48903	0.231934
	-1.98634	0.428607		1.48917	0.27771
	-1.98652	0.42761		1.48935	0.256348
	-1.9867	0.422876		1.48958	0.201416
	-1.98686	0.416646		1.48986	0.244141
	-1.98701	0.412659		1.49019	0.317383
	-1.98716	0.416148		1.49056	0.393677
	-1.9873	0.420135		1.49097	0.411987
	-1.98743	0.42163		1.49144	0.387573
	-1.98755	0.419138		1.49195	0.369263
	-1.98766	0.418141		1.4925	0.421143
	-1.98776	0.411911		1.4931	0.466919
	-1.98785	0.41241		1.49375	0.387573
	-1.98794	0.413406		1.49444	0.360107
	-1.98801	0.413157		1.49518	0.372314
	-1.98807	0.417144		1.49596	0.332642
	-1.98813	0.421131		1.49678	0.289917
	-1.98817	0.425368		1.49765	0.320435
	-1.98821	0.428358		1.49857	0.292969
	-1.98823	0.425368		1.49952	0.27771
	-1.98825	0.423623		1.50053	0.320435
	-1.98825	0.428856		1.50157	0.320435
	-1.98824	0.43384		1.50266	0.326538
	-1.98823	0.434588		1.50379	0.320435
	-1.9882	0.435086		1.50497	0.265503
	-1.98816	0.431847		1.50618	0.280762
	-1.98811	0.42761		1.50745	0.360107
	-1.98805	0.428358		1.50875	0.448608
	-1.98798	0.430601		1.5101	0.463867
	-1.9879	0.433092		1.51149	0.463867
	-1.98781	0.431597		1.51292	0.476074
	-1.98771	0.431847		1.5144	0.442505
	-1.9876	0.43384		1.51591	0.43335
	-1.98747	0.43085		1.51747	0.469971
	-1.98734	0.432096		1.51908	0.488281
	-1.9872	0.433092		1.52072	0.494385
	-1.98704	0.432594		1.52241	0.424194
	-1.98688	0.43085		1.52413	0.384521
	-1.9867	0.429355		1.5259	0.366211
	-1.98651	0.431847		1.52771	0.3479
	-1.98632	0.435086		1.52956	0.320435
	-1.98611	0.434089		1.53145	0.320435
	-1.98589	0.431099		1.53339	0.396729
	-1.98566	0.428109		1.53536	0.427246
	-1.98542	0.428109		1.53737	0.390625
	-1.98517	0.427361		1.53942	0.378418
	-1.98491	0.428607		1.54151	0.372314
	-1.98465	0.428607		1.54365	0.411987
	-1.98437	0.431847		1.54582	0.396729
	-1.98408	0.432843		1.54802	0.384521
	-1.98378	0.431847		1.55027	0.387573
	-1.98347	0.430102		1.55256	0.366211
	-1.98315	0.429604		1.55488	0.393677
	-1.98283	0.430351		1.55724	0.439453
	-1.98249	0.429105		1.55964	0.466919
	-1.98215	0.430102		1.56207	0.424194
	-1.98179	0.426863		1.56454	0.402832
	-1.98143	0.426613		1.56705	0.43335
	-1.98106	0.423623		1.56959	0.500488
	-1.98068	0.416646		1.57217	0.509644
	-1.9803	0.411164		1.57478	0.463867
	-1.9799	0.411413		1.57743	0.482178
	-1.9795	0.4154		1.5801	0.509644
	-1.97909	0.416148		1.58282	0.473022
	-1.97867	0.416148		1.58556	0.479126
	-1.97824	0.414902		1.58834	0.405884
	-1.97781	0.414403		1.59114	0.366211
	-1.97737	0.415898		1.59398	0.402832
	-1.97692	0.416148		1.59685	0.439453
	-1.97646	0.410665		1.59974	0.445557
	-1.976	0.409419		1.60267	0.411987
	-1.97553	0.410665		1.60562	0.39978
	-1.97506	0.417144		1.6086	0.378418
	-1.97457	0.420633		1.56399	0.375366
	-1.97409	0.423872		1.56703	0.354004
	-1.97359	0.417892		1.57009	0.323486
	-1.97309	0.413656		1.57317	0.354004
	-1.97258	0.415151		1.57628	0.32959
	-1.97207	0.415898		1.57942	0.305176
	-1.97155	0.410665		1.58257	0.320435
	-1.97103	0.405931		1.58575	0.38147
	-1.9705	0.40294		1.58895	0.39978
	-1.96997	0.405931		1.59218	0.402832
	-1.96943	0.408173		1.59542	0.402832
	-1.96889	0.406429		1.59869	0.338745
	-1.96834	0.404685		1.60197	0.341797
	-1.96779	0.410915		1.60528	0.323486
	-1.96723	0.4154		1.6086	0.344849
	-1.96667	0.417393		1.61194	0.302124
	-1.96611	0.415898		1.6153	0.234985
	-1.96554	0.416148		1.61868	0.228882
	-1.96497	0.417144		1.62207	0.234985
	-1.9644	0.415898		1.62548	0.265503
	-1.96382	0.4154		1.6289	0.317383
	-1.96324	0.420135		1.63234	0.375366
	-1.96266	0.422128		1.60721	0.375366
	-1.96208	0.421381		1.61068	0.302124
	-1.96149	0.418141		1.61416	0.262451
	-1.9609	0.414154		1.61765	0.241089
	-1.96031	0.414652		1.62115	0.271606
	-1.95971	0.414652		1.62466	0.280762
	-1.95912	0.417393		1.62819	0.247192
	-1.95852	0.417892		1.63172	0.253296
	-1.95793	0.413905		1.63527	0.256348
	-1.95733	0.411164		1.61977	0.241089
	-1.95673	0.410416		1.62333	0.311279
	-1.95613	0.416895		1.6269	0.280762
	-1.95553	0.423125		1.63048	0.222778
	-1.95493	0.425368		1.63407	0.167847
	-1.95433	0.422377		1.63766	0.195312
	-1.95373	0.420882		1.64126	0.204468
	-1.95312	0.426613		1.59724	0.250244
	-1.95252	0.433342		1.60085	0.289917
	-1.95192	0.432096		1.60447	0.302124
	-1.95132	0.425617		1.60809	0.280762
	-1.95073	0.420135		1.61171	0.305176
	-1.95013	0.413656		1.61534	0.314331
	-1.94953	0.414652		1.61897	0.268555
	-1.94893	0.418639		1.62261	0.311279
	-1.94834	0.421381		1.62624	0.335693
	-1.94775	0.420633		1.62988	0.369263
	-1.94716	0.418889		1.63353	0.393677
	-1.94657	0.417144		1.63717	0.418091
	-1.94598	0.422128		1.5932	0.405884
	-1.94539	0.425368		1.59684	0.378418
	-1.94481	0.42163		1.60049	0.350952
	-1.94423	0.423125		1.60414	0.320435
	-1.94365	0.419885		1.60779	0.299072
	-1.94307	0.414154		1.61144	0.338745
	-1.94249	0.41241		1.61509	0.341797
	-1.94192	0.410416		1.61874	0.296021
	-1.94135	0.412908		1.62239	0.280762
	-1.94078	0.4154		1.62604	0.308228
	-1.94022	0.413157		1.62969	0.335693
	-1.93966	0.413406		1.63334	0.378418
	-1.9391	0.417892		1.63699	0.45166
	-1.93854	0.419885		1.64064	0.405884
	-1.93799	0.420384		1.64428	0.363159
	-1.93744	0.416397		1.64793	0.308228
	-1.93689	0.420633		1.65158	0.292969
	-1.93635	0.423872		1.65522	0.299072
	-1.93581	0.41839		1.65886	0.262451
	-1.93527	0.415649		1.66251	0.27771
	-1.93474	0.410915		1.66615	0.268555
	-1.93421	0.405183		1.66979	0.201416
	-1.93369	0.406927		1.67342	0.17395
	-1.93317	0.406927		1.67706	0.228882
	-1.93265	0.407177		1.6807	0.247192
	-1.93214	0.408672		1.68433	0.280762
	-1.93162	0.408672		1.68796	0.27771
	-1.93112	0.407675		1.69159	0.268555
	-1.93062	0.405183		1.69522	0.244141
	-1.93012	0.401196		1.69885	0.241089
	-1.92962	0.40319		1.70248	0.274658
	-1.92913	0.405432		1.7061	0.27771
	-1.92865	0.412659		1.70973	0.311279
	-1.92817	0.4154		1.71335	0.299072
	-1.92769	0.410167		1.71697	0.326538
	-1.92721	0.403688		1.72059	0.308228
	-1.92675	0.405183		1.72421	0.341797
	-1.92628	0.410416		1.72783	0.335693
	-1.92582	0.418141		1.73145	0.396729
	-1.92536	0.42163		1.73506	0.38147
	-1.92491	0.418141		1.73867	0.299072
	-1.92447	0.413406		1.74229	0.256348
	-1.92402	0.406678		1.74589	0.216675
	-1.92358	0.405931		1.7495	0.20752
	-1.92315	0.404436		1.75311	0.210571
	-1.92272	0.407426		1.75671	0.238037
	-1.9223	0.413905		1.76031	0.253296
	-1.92188	0.415151		1.76391	0.262451
	-1.92146	0.413157		1.76751	0.271606
	-1.92105	0.409669		1.77111	0.231934
	-1.92065	0.408173		1.7747	0.238037
	-1.92024	0.407675		1.77829	0.204468
	-1.91985	0.409419		1.78187	0.167847
	-1.91946	0.410167		1.78546	0.195312
	-1.91907	0.414652		1.78904	0.256348
	-1.91869	0.417144		1.79261	0.283813
	-1.91831	0.41839		1.79619	0.247192
	-1.91793	0.416148		1.79976	0.216675
	-1.91757	0.415151		1.80332	0.195312
	-1.9172	0.417643		1.80688	0.20752
	-1.91684	0.420384		1.81044	0.259399
	-1.91649	0.417393		1.81399	0.27771
	-1.91614	0.410416		1.81754	0.238037
	-1.91579	0.411662		1.82108	0.201416
	-1.91545	0.420882		1.82461	0.140381
	-1.91512	0.425118		1.82814	0.152588
	-1.91479	0.428607		1.83167	0.17395
	-1.91446	0.425118		1.83519	0.158691
	-1.91414	0.424122		1.8387	0.158691
	-1.91382	0.424869		1.84221	0.210571
	-1.91351	0.420135		1.84571	0.213623
	-1.91321	0.417892		1.8492	0.228882
	-1.9129	0.423125		1.85269	0.253296
	-1.91261	0.425368		1.85616	0.296021
	-1.91232	0.425368		1.85963	0.289917
	-1.91203	0.42462		1.8631	0.247192
	-1.91175	0.426613		1.86655	0.20752
	-1.91147	0.425866		1.87	0.195312
	-1.91119	0.421879		1.87344	0.204468
	-1.91093	0.419387		1.87686	0.238037
	-1.91066	0.422876		1.88028	0.268555
	-1.9104	0.428358		1.88369	0.311279
	-1.91015	0.432345		1.8871	0.38147
	-1.9099	0.434588		1.89049	0.445557
	-1.90965	0.434837		1.89387	0.369263
	-1.90941	0.433591		1.89724	0.363159
	-1.90918	0.429853		1.9006	0.375366
	-1.90895	0.426613		1.90395	0.38147
	-1.90872	0.423125		1.90729	0.344849
	-1.9085	0.422128		1.91062	0.296021
	-1.90828	0.420633		1.91394	0.299072
	-1.90807	0.416148		1.91724	0.292969
	-1.90786	0.414403		1.92054	0.283813
	-1.90766	0.415898		1.92382	0.299072
	-1.90746	0.419885		1.92709	0.354004
	-1.90727	0.422377		1.93035	0.344849
	-1.90708	0.425368		1.93359	0.308228
	-1.90689	0.423872		1.93683	0.338745
	-1.90671	0.423125		1.94005	0.390625
	-1.90654	0.421879		1.94325	0.402832
	-1.90637	0.415151		1.94645	0.421143
	-1.9062	0.4154		1.94963	0.457764
	-1.90604	0.417643		1.95279	0.454712
	-1.90588	0.417643		1.95595	0.421143
	-1.90573	0.41839		1.95909	0.387573
	-1.90558	0.422377		1.96221	0.363159
	-1.90543	0.420882		1.96533	0.393677
	-1.90529	0.423623		1.96843	0.402832
	-1.90516	0.424371		1.97151	0.360107
	-1.90503	0.42462		1.97459	0.320435
	-1.9049	0.426613		1.97765	0.372314
	-1.90478	0.426115		1.98069	0.439453
	-1.90466	0.425866		1.98372	0.430298
	-1.90455	0.423872		1.98674	0.424194
[truncated: 18,004 more rows]
[truncated: 860 more columns]

## Sheet: Fig3B
	Example-Null
		Before			MIRS					Timepoint(ms)	-300	-299	-298	-297	-296	-295	-294	-293	-292	-291	-290	-289	-288	-287	-286	-285	-284	-283	-282	-281	-280	-279	-278	-277	-276	-275	-274	-273	-272	-271	-270	-269	-268	-267	-266	-265	-264	-263	-262
		EOG(deg)	Spikes(V)		EOG(deg)	Spikes(V)				Firing rate (Hz)	49.2776	49.163	49.0406	48.9104	48.7722	48.626	48.4647	48.295	48.117	47.9307	47.7363	47.5337	47.3218	47.1022	46.8748	46.6398	46.3975	46.148	45.8915	45.6281	45.3582	45.0819	44.7994	44.5111	44.2172	43.9179	43.6135	43.3201	43.0212	42.7172	42.4084	42.0952	41.7779	41.457	41.1326	40.8053	40.4753	40.1429	39.8086
		-17.7916	0.446712		-7.88893	0.457672					40.1524	39.9862	39.814	39.6356	39.4515	39.2615	39.0661	38.8652	38.6591	38.4479	38.2319	38.0112	37.7859	37.5563	37.3226	37.085	36.8436	36.5986	36.3503	36.0989	35.8444	35.5873	35.3275	35.0654	34.8012	34.5288	34.2551	33.9802	33.7042	33.4273	33.1498	32.8717	32.5932	32.3146	32.0359	31.7574	31.4791	31.2013	30.924
		-17.866	0.4452		-7.44962	0.450265					13.2537	13.2379	13.2017	13.1682	13.1375	13.1095	13.0842	13.0616	13.0418	13.0246	13.0101	12.9984	12.9892	12.9827	12.9788	12.9743	12.9726	12.9735	12.9771	12.9833	12.9921	13.0034	13.0171	13.0332	13.0516	13.0723	13.0951	13.1201	13.1471	13.176	13.2068	13.2393	13.2735	13.3093	13.3466	13.3853	13.4252	13.4662	13.5083
		-17.9217	0.438398		-7.0162	0.439683					0.225739	0.243115	0.261366	0.280522	0.300616	0.321681	0.34375	0.366856	0.391034	0.416316	0.442738	0.470332	0.499134	0.529177	0.560494	0.599855	0.640985	0.683941	0.728778	0.775552	0.82432	0.875139	0.928065	0.983156	1.07815	1.1778	1.28232	1.39186	1.50664	1.62684	1.75266	1.8843	2.02197	2.11669	2.21473	2.31616	2.42102	2.52935	2.64121
		-17.9579	0.436886		-6.5926	0.435979					15.5759	15.5799	15.5835	15.5865	15.5891	15.5911	15.5926	15.5937	15.5942	15.5941	15.5935	15.5922	15.5904	15.5878	15.5846	15.5806	15.5757	15.57	15.5634	15.5557	15.547	15.5372	15.5261	15.5137	15.5	15.4848	15.468	15.4496	15.4295	15.4076	15.3837	15.3579	15.33	15.2999	15.2675	15.2327	15.1955	15.1558	15.1134
		-17.9742	0.444067		-6.18261	0.440741					9.91513	10.0525	10.1902	10.3279	10.4655	10.603	10.7402	10.8769	11.0131	11.1486	11.2832	11.4168	11.5493	11.6806	11.8104	11.9387	12.0653	12.19	12.3128	12.4334	12.5518	12.6678	12.7811	12.8918	12.9997	13.1046	13.2064	13.3049	13.4	13.4917	13.5797	13.664	13.7445	13.8209	13.8932	13.9614	14.0253	14.0847	14.1397
		-17.9705	0.450113		-5.78972	0.45291					0.222355	0.258825	0.297443	0.338308	0.381523	0.427197	0.475437	0.526358	0.580074	0.636702	0.696365	0.759184	0.811262	0.86586	0.923062	0.982952	1.04561	1.11113	1.17959	1.25108	1.32567	1.40345	1.48451	1.56892	1.65676	1.74811	1.84305	1.94164	2.04397	2.15009	2.26008	2.374	2.4919	2.61385	2.73989	2.87007	3.00444	3.14303	3.28587
		-17.947	0.458806		-5.41707	0.453968					37.4632	37.4889	37.5032	37.5061	37.4978	37.4783	37.4477	37.4062	37.3538	37.2909	37.2174	37.1338	37.04	36.9365	36.8234	36.701	36.5695	36.4293	36.2806	36.1238	35.9591	35.787	35.6077	35.4216	35.229	35.0203	34.8051	34.584	34.3571	34.1248	33.8876	33.6457	33.3994	33.1491	32.8952	32.6379	32.3776	32.1147	31.8493
		-17.9039	0.457672		-5.06739	0.455026					31.5147	31.5207	31.5304	31.5436	31.5603	31.5801	31.6029	31.6281	31.6559	31.6859	31.718	31.7518	31.7871	31.8237	31.8613	31.8995	31.9382	31.977	32.0156	32.0538	32.0745	32.0953	32.1157	32.1356	32.1544	32.1721	32.1881	32.2023	32.2142	32.2238	32.2306	32.2344	32.2349	32.2463	32.2531	32.2551	32.2521	32.2441	32.2307
		-17.8414	0.462963		-4.74308	0.453439					17.4398	17.2569	17.0751	16.8943	16.7146	16.5359	16.3582	16.1816	16.0061	15.8218	15.6391	15.4581	15.2787	15.101	14.9248	14.7502	14.5771	14.4055	14.2354	14.0668	13.8996	13.7338	13.5694	13.4064	13.2447	13.0844	12.9255	12.7678	12.6115	12.4565	12.3077	12.1599	12.0131	11.8674	11.7227	11.5791	11.4365	11.2951	11.1548
		-17.7594	0.465231		-4.44605	0.449206					23.2982	23.4582	23.614	23.7652	23.9117	24.0532	24.1893	24.3198	24.4445	24.5631	24.6754	24.7812	24.8802	24.9721	25.0569	25.1342	25.2039	25.2658	25.3197	25.3654	25.4028	25.4318	25.4521	25.4638	25.4666	25.4605	25.4454	25.4213	25.3879	25.3454	25.2937	25.2328	25.1626	25.0831	24.9945	24.8966	24.7897	24.6736	24.5486
		-17.6578	0.465231		-4.17779	0.451323					19.9653	20.1063	20.2429	20.3748	20.5017	20.6232	20.7391	20.8491	20.9528	21.0499	21.1403	21.2236	21.2995	21.3679	21.4284	21.4861	21.5353	21.5757	21.6072	21.6297	21.6429	21.6469	21.6415	21.6266	21.6022	21.5681	21.5244	21.471	21.408	21.3353	21.2531	21.1612	21.0599	20.9491	20.8291	20.6998	20.5615	20.4143	20.2584
		-17.537	0.464475		-3.93945	0.453968					10.6437	10.6533	10.6642	10.6762	10.6896	10.7041	10.72	10.7371	10.7555	10.7751	10.7961	10.8182	10.8417	10.8663	10.8922	10.9192	10.9474	10.9767	11.0072	11.0386	11.0711	11.1046	11.1389	11.1741	11.2101	11.2467	11.2841	11.322	11.3604	11.3992	11.4383	11.4777	11.5172	11.5567	11.5962	11.6356	11.6746	11.7133	11.7515
		-17.3972	0.464475		-3.73199	0.457143					13.5154	13.5897	13.666	13.744	13.8239	13.9054	13.9886	14.0733	14.1595	14.247	14.3359	14.4259	14.517	14.6091	14.702	14.7956	14.8898	14.9844	15.0793	15.1743	15.2693	15.364	15.4585	15.5524	15.6457	15.7382	15.8296	15.9198	16.0087	16.096	16.1815	16.2651	16.3466	16.4257	16.5023	16.5762	16.6472	16.7151	16.7797
		-17.2395	0.459184		-3.55623	0.457143					6.16872	5.99364	5.8216	5.65268	5.48696	5.3245	5.16536	5.00959	4.85723	4.70833	4.56293	4.42103	4.28267	4.14786	4.0166	3.88889	3.76474	3.64413	3.52704	3.41347	3.30337	3.19673	3.09351	2.99367	2.89717	2.80397	2.71401	2.62726	2.54365	2.46312	2.38562	2.31109	2.23947	2.17068	2.10466	2.04135	1.98068	1.92258	1.86697
		-17.0647	0.452759		-3.41284	0.461376					9.41454	9.5295	9.64537	9.76207	9.87949	9.99754	10.1161	10.2351	10.3544	10.4738	10.5933	10.7128	10.832	10.951	11.0695	11.1874	11.3046	11.4209	11.5363	11.6505	11.7634	11.8749	11.9847	12.0929	12.1992	12.3034	12.4055	12.5053	12.6025	12.6972	12.7891	12.878	12.9639	13.0466	13.126	13.2018	13.2741	13.3426	13.4072
		-16.8747	0.452003		-3.30233	0.457672					24.7274	24.5441	24.3537	24.1565	23.9527	23.7424	23.526	23.3035	23.0753	22.8416	22.6026	22.3587	22.1099	21.8566	21.599	21.3375	21.0721	20.8033	20.5312	20.2561	19.9783	19.698	19.4155	19.131	18.8448	18.5572	18.2683	17.9784	17.6878	17.3966	17.1053	16.8138	16.5226	16.2318	15.9416	15.6522	15.3639	15.0768	14.7911
		-16.6712	0.450113		-3.22495	0.450265					22.3292	22.1453	21.9603	21.7743	21.5872	21.3992	21.2102	21.0203	20.8295	20.6378	20.4452	20.2518	20.0576	19.8626	19.6668	19.4704	19.2732	19.0754	18.8769	18.6778	18.4782	18.2779	18.0772	17.876	17.6743	17.4721	17.2696	17.0667	16.8702	16.673	16.475	16.2765	16.0774	15.8778	15.6777	15.4772	15.2763	15.0751	14.8737
		-16.457	0.448602		-3.18072	0.454497					21.9511	22.0337	22.117	22.201	22.2854	22.3672	22.4489	22.5302	22.6109	22.691	22.7701	22.8481	22.9247	22.9999	23.0735	23.1585	23.2408	23.3201	23.3963	23.4694	23.5393	23.6058	23.6689	23.7284	23.7844	23.8366	23.885	23.9296	23.9704	24.0071	24.0399	24.0686	24.0932	24.1137	24.1301	24.1424	24.1505	24.1544	24.1542
		-16.2347	0.448602		-3.16932	0.45873					10.055	10.2187	10.3862	10.5575	10.7325	10.9111	11.0934	11.2791	11.4683	11.6608	11.8565	12.0553	12.2571	12.4618	12.6692	12.8792	13.0916	13.3063	13.5231	13.7418	13.9622	14.1843	14.4076	14.6322	14.8577	15.0839	15.3107	15.5377	15.7649	15.9919	16.2185	16.4445	16.6697	16.8938	17.1165	17.3377	17.5571	17.7744	17.9894
		-16.0075	0.44898		-3.19018	0.451323					17.3812	17.313	17.2412	17.1657	17.0867	17.0043	16.9185	16.8296	16.7374	16.6423	16.5442	16.4433	16.3396	16.2333	16.1244	16.013	15.8993	15.7832	15.6649	15.5444	15.4219	15.2974	15.171	15.0428	14.9129	14.7812	14.648	14.5132	14.3769	14.2392	14.1002	13.9599	13.8184	13.6758	13.532	13.3873	13.2416	13.095	12.9475
		-15.7783	0.449735		-3.24253	0.437566					13.3078	13.2237	13.1387	13.0531	12.9668	12.8799	12.7925	12.7046	12.6163	12.5276	12.4386	12.3494	12.2543	12.1594	12.0648	11.9705	11.8765	11.7828	11.6896	11.5967	11.5044	11.4125	11.3212	11.2305	11.1404	11.051	10.9622	10.8742	10.787	10.7005	10.6149	10.5302	10.4463	10.3634	10.2815	10.2005	10.1206	10.0417	9.96391
		-15.5501	0.448602		-3.32534	0.433333					13.7223	13.7428	13.7625	13.7814	13.7993	13.8163	13.832	13.8465	13.8597	13.8714	13.8815	13.8898	13.8964	13.901	13.9036	13.8973	13.8892	13.879	13.8667	13.8521	13.8351	13.8155	13.7933	13.7683	13.7404	13.7095	13.6754	13.6382	13.5976	13.5537	13.5063	13.4554	13.4008	13.3426	13.2807	13.215	13.1455	13.0722	12.9951
		-15.3255	0.450113		-3.43736	0.441799					28.8091	28.4971	28.178	27.852	27.5197	27.1812	26.8371	26.4876	26.1331	25.7741	25.4108	25.0437	24.673	24.2992	23.9225	23.5434	23.1622	22.7792	22.3947	22.0091	21.6227	21.2358	20.8487	20.4617	20.0751	19.6892	19.3043	18.9205	18.5382	18.1577	17.7791	17.4028	17.0289	16.6576	16.2893	15.924	15.5619	15.2033	14.8484
		-15.1068	0.447468		-3.57694	0.456085					31.6382	31.4982	31.3564	31.2132	31.0688	30.9234	30.7774	30.631	30.4845	30.338	30.1919	30.0465	29.9019	29.7584	29.6162	29.4756	29.3368	29.2	29.0654	28.9332	28.8036	28.6714	28.5424	28.4169	28.295	28.1767	28.0623	27.945	27.8313	27.7212	27.6149	27.5124	27.4137	27.3188	27.2278	27.1406	27.0573	26.9779	26.9022
		-14.8961	0.442555		-3.74206	0.456085					12.1027	12.1925	12.2796	12.364	12.4455	12.5241	12.5997	12.6724	12.742	12.8085	12.8719	12.9322	12.9892	13.0431	13.0937	13.1411	13.1853	13.2262	13.2639	13.2984	13.3297	13.3578	13.3828	13.4047	13.4234	13.4392	13.452	13.4618	13.4687	13.4728	13.4742	13.4728	13.4688	13.4623	13.4533	13.4419	13.4249	13.4056	13.3838
		-14.6948	0.437642		-3.93048	0.451323					12.1914	11.8827	11.5787	11.2792	10.9992	10.7229	10.4503	10.1814	9.9164	9.65527	9.39805	9.1448	8.89555	8.65035	8.40923	8.17222	7.93936	7.71066	7.48616	7.26587	6.97779	6.69838	6.42742	6.1647	5.98838	5.81506	5.64481	5.47766	5.31367	5.15288	4.99532	4.84103	4.69002	4.54233	4.39797	4.25696	4.1193	3.98499	3.85404
		-14.5042	0.439153		-4.14002	0.442328					-0.303129	-0.303129	-0.303129	-0.303129	-0.303129	-0.303129	-0.303129	-0.303129	-0.303129	-0.303129	-0.303129	-0.303129	-0.303129	-0.303129	-0.303129	-0.303129	-0.303129	-0.303129	-0.303129	-0.303129	-0.303129	-0.303129	-0.303129	-0.303129	-0.303129	-0.303129	-0.303129	-0.303129	-0.303129	-0.303129	-0.303129	-0.303129	-0.303129	-0.303129	-0.303129	-0.303129	-0.303129	-0.303129	-0.303129
		-14.325	0.443311		-4.36887	0.429101					24.555	24.7395	24.9153	25.0819	25.2393	25.387	25.5248	25.6525	25.7698	25.8765	25.9724	26.0573	26.131	26.1934	26.2443	26.2836	26.3112	26.3269	26.3306	26.3224	26.3022	26.2699	26.2256	26.1692	26.1007	26.0203	25.928	25.8239	25.708	25.5806	25.4417	25.2915	25.1302	24.9579	24.7749	24.5814	24.3777	24.1639	23.9404
		-14.1583	0.44709		-4.61584	0.421693					22.8848	22.8793	22.8877	22.8967	22.9061	22.9156	22.9253	22.9349	22.9443	22.9535	22.9623	22.9705	22.9782	22.9851	22.9913	22.9965	23.0008	23.004	23.0061	23.007	23.0067	23.005	22.9938	22.9807	22.9655	22.9483	22.929	22.9075	22.8837	22.8577	22.8294	22.8107	22.7889	22.764	22.7359	22.7048	22.6705	22.6332	22.5927
		-14.0048	0.454271		-4.88042	0.422751					12.6402	12.3737	12.1105	11.8507	11.5945	11.3419	11.0932	10.8483	10.6074	10.3706	10.138	9.9096	9.68551	9.46579	9.2505	9.03967	8.83336	8.63159	8.4344	8.24179	8.0538	7.87042	7.69166	7.51751	7.34796	7.183	7.02261	6.86675	6.71316	6.56417	6.41975	6.27983	6.14436	6.01329	5.88654	5.76405	5.64576	5.53159	5.42146
		-13.8655	0.460317		-5.16242	0.41746					20.099	20.0427	19.9865	19.9305	19.8703	19.81	19.7494	19.6885	19.6014	19.5156	19.4308	19.3471	19.2641	19.182	19.1004	19.0194	18.9388	18.8586	18.7786	18.6988	18.6191	18.5633	18.506	18.4472	18.3868	18.325	18.2618	18.1971	18.1309	18.0633	17.9943	17.924	17.8522	17.7792	17.7048	17.6291	17.5521	17.4739	17.3944
		-13.7414	0.468254		-5.46156	0.419048					18.2912	18.2603	18.224	18.1825	18.1356	18.0835	18.0262	17.9636	17.8959	17.823	17.745	17.662	17.574	17.481	17.3833	17.2807	17.1734	17.0616	16.9452	16.8244	16.6993	16.5699	16.4365	16.2991	16.1578	16.0128	15.8643	15.7122	15.5569	15.3984	15.2368	15.0656	14.8921	14.7165	14.5388	14.3593	14.178	13.9951	13.8109
		-13.6333	0.46712		-5.77709	0.421693					11.2812	11.2674	11.2576	11.2518	11.2501	11.2525	11.259	11.2695	11.2842	11.3029	11.3257	11.3525	11.3833	11.4181	11.4568	11.4995	11.5459	11.6488	11.7588	12.008	12.2728	12.5539	12.6616	12.7745	12.8928	13.0162	13.1448	13.2785	13.4172	13.561	13.7096	13.8632	14.0215	14.1845	14.3521	14.5242	14.7007	14.8816	15.0666
		-13.5423	0.464475		-6.10783	0.418519					2.86892	2.87392	2.88025	2.88791	2.89691	2.90727	2.919	2.93213	2.94665	2.96259	2.97997	2.99881	3.01912	3.04091	3.06422	3.08906	3.11545	3.14341	3.17296	3.20412	3.23692	3.27136	3.30748	3.34837	3.39078	3.43474	3.48028	3.52743	3.57621	3.62665	3.67878	3.73261	3.78816	3.84546	3.90453	3.96537	4.02801	4.09246	4.15872
		-13.469	0.45805		-6.45227	0.425397					22.6967	22.4707	22.2418	22.0101	21.7724	21.5325	21.2905	21.0465	20.8007	20.5532	20.3043	20.0541	19.8028	19.5506	19.2977	19.0441	18.7901	18.536	18.2818	18.0277	17.7739	17.5206	17.268	17.0162	16.7654	16.5157	16.2674	16.0205	15.7753	15.5319	15.2904	15.051	14.8105	14.5726	14.3374	14.1049	13.8754	13.6489	13.4254
		-13.4144	0.458428		-6.80868	0.419048					10.2823	10.3469	10.4156	10.4881	10.5634	10.6428	10.7265	10.8144	10.9067	11.0031	11.1039	11.209	11.3183	11.432	11.5498	11.672	11.7984	11.9289	12.0637	12.2026	12.3456	12.5037	12.6665	12.834	13.0061	13.1829	13.3643	13.5503	13.7408	13.9358	14.1353	14.3393	14.5476	14.7602	14.9772	15.1983	15.4236	15.6531	15.8654
		-13.3789	0.462207		-7.17502	0.421693					15.9029	16.069	16.2321	16.3921	16.5488	16.7019	16.8512	16.9966	17.1377	17.2745	17.4067	17.5341	17.6565	17.7738	17.8858	17.9922	18.093	18.188	18.277	18.3599	18.4366	18.5068	18.5705	18.6276	18.678	18.7216	18.7582	18.7878	18.8104	18.8258	18.8341	18.8351	18.8289	18.8154	18.7946	18.7665	18.7312	18.6886	18.6387
		-13.363	0.468254		-7.54898	0.426455					10.443	10.4386	10.4417	10.4449	10.4482	10.4514	10.4547	10.4581	10.4614	10.4648	10.4682	10.4717	10.4751	10.4786	10.4821	10.4856	10.4891	10.4927	10.4962	10.4998	10.5034	10.507	10.5106	10.5142	10.5178	10.5214	10.525	10.5287	10.5323	10.5359	10.5395	10.5431	10.5467	10.5503	10.5538	10.5574	10.5609	10.5645	10.568
		-13.3667	0.465231		-7.92798	0.439153					8.83765	8.75506	8.6741	8.59486	8.51738	8.44176	8.36805	8.29632	8.22663	8.15905	8.09365	8.03047	7.96959	7.91105	7.85492	7.80124	7.75008	7.70148	7.65549	7.61216	7.57154	7.53366	7.49857	7.46632	7.43693	7.41045	7.38691	7.36634	7.34877	7.33424	7.32276	7.31437	7.30908	7.30692	7.3079	7.31205	7.31936	7.3304	7.34467
		-13.3897	0.463341		-8.30931	0.450265					9.34363	9.35519	9.36699	9.37904	9.39134	9.4039	9.41671	9.42977	9.44308	9.45665	9.47048	9.48455	9.49889	9.51348	9.52832	9.54343	9.55878	9.5744	9.59027	9.60639	9.62278	9.63941	9.65631	9.67345	9.69086	9.70851	9.72642	9.74459	9.763	9.78167	9.80059	9.81977	9.83919	9.85885	9.87877	9.89893	9.91934	9.93999	9.96088
		-13.4312	0.465608		-8.69015	0.447619					12.269	12.3601	12.4508	12.541	12.6308	12.72	12.8088	12.897	12.9847	13.0718	13.1583	13.2441	13.3293	13.4138	13.4977	13.5808	13.6632	13.7448	13.8183	13.8905	13.9614	14.031	14.0992	14.166	14.2314	14.2952	14.3575	14.4183	14.4774	14.5348	14.5906	14.6446	14.6968	14.7472	14.7957	14.8423	14.8869	14.9295	14.97
		-13.4903	0.464475		-9.0677	0.450794					20.2687	20.143	20.021	19.9029	19.7887	19.6784	19.572	19.4695	19.371	19.2765	19.1886	19.1045	19.0242	18.9477	18.875	18.806	18.7408	18.6793	18.6215	18.5674	18.5168	18.4698	18.4262	18.3861	18.3493	18.3157	18.2853	18.258	18.2337	18.2122	18.1935	18.1774	18.1638	18.1526	18.1436	18.1368	18.1319	18.1251	18.1202
		-13.566	0.464475		-9.43924	0.440741					13.2481	13.2692	13.2911	13.3137	13.3374	13.3623	13.4119	13.4646	13.5205	13.5801	13.6434	13.7108	13.7826	13.8591	13.9405	14.027	14.1183	14.1873	14.2607	14.3386	14.4212	14.5087	14.6013	14.6992	14.8024	14.9113	15.0259	15.1464	15.2729	15.4056	15.5447	15.6901	15.8421	16.0007	16.3411	16.6995	17.0764	17.2903	17.5125
		-13.657	0.465608		-9.80231	0.433333					19.5083	19.5316	19.5545	19.5771	19.5996	19.6219	19.6442	19.6666	19.689	19.7117	19.7346	19.7577	19.7811	19.8049	19.8289	19.8533	19.878	19.903	19.9283	19.9538	19.9795	20.0053	20.0311	20.057	20.0827	20.1083	20.1335	20.1583	20.1826	20.2062	20.2291	20.251	20.2718	20.2914	20.3096	20.3262	20.3411	20.3542	20.3652
		-13.7619	0.464853		-10.1547	0.42963					12.5945	12.7061	12.8144	12.9192	13.0203	13.1174	13.2105	13.2992	13.3834	13.4629	13.5376	13.6072	13.6717	13.7308	13.7844	13.8324	13.8746	13.911	13.9414	13.9657	13.9839	13.9958	14.0014	14.0007	13.9935	13.98	13.9599	13.9335	13.9005	13.8612	13.8154	13.7633	13.7049	13.6402	13.5694	13.4924	13.4095	13.3207	13.2262
		-13.879	0.46901		-10.4943	0.425397					10.3062	10.2408	10.1769	10.1145	10.0537	9.99441	9.93672	9.88065	9.82621	9.77342	9.72229	9.67285	9.62509	9.57904	9.5347	9.49206	9.45115	9.41195	9.37447	9.33871	9.30466	9.27232	9.24168	9.21104	9.18218	9.1551	9.12977	9.10618	9.0843	9.06412	9.04562	9.02877	9.01355	8.99994	8.98791	8.97744	8.96849	8.96106	8.9551
		-14.0066	0.473167		-10.8195	0.426455					18.8589	18.9717	19.0799	19.1835	19.2824	19.3765	19.4657	19.5499	19.6337	19.7122	19.7853	19.853	19.9154	19.9724	20.0241	20.0704	20.1114	20.1472	20.1777	20.203	20.2233	20.2384	20.2486	20.2539	20.2543	20.25	20.2411	20.2276	20.2096	20.1873	20.1608	20.1302	20.0956	20.0572	20.0149	19.9691	19.9198	19.8671	19.8112
		-14.1429	0.472033		-11.1285	0.424868					21.7752	21.6513	21.5267	21.4016	21.2759	21.1495	21.0224	20.8945	20.7659	20.6365	20.5062	20.375	20.2428	20.1095	19.9752	19.8276	19.6795	19.5308	19.3815	19.2315	19.0807	18.9289	18.7762	18.6224	18.4674	18.3113	18.1538	17.995	17.8348	17.6731	17.5099	17.3452	17.1789	17.0109	16.8414	16.6702	16.4973	16.3227	16.1465
		-14.2863	0.465231		-11.4196	0.426984					21.5737	21.7063	21.8357	21.9618	22.0846	22.204	22.3201	22.4327	22.542	22.6479	22.7503	22.8493	22.9448	23.0369	23.1256	23.2109	23.2927	23.3712	23.4462	23.518	23.5863	23.6514	23.7131	23.7716	23.8268	23.8788	23.9276	23.9732	24.0156	24.0549	24.091	24.1241	24.154	24.1809	24.2047	24.2255	24.2432	24.2579	24.2696
		-14.4358	0.460695		-11.6915	0.434392					13.348	13.139	12.9307	12.7229	12.5159	12.3097	12.1043	11.8998	11.6962	11.4936	11.292	11.0915	10.8922	10.694	10.4972	10.3017	10.1075	9.91481	9.72359	9.53393	9.34069	9.14942	8.96018	8.77301	8.58794	8.40501	8.22426	8.04573	7.86946	7.69548	7.52383	7.35455	7.18767	7.02323	6.86125	6.70177	6.54482	6.39042	6.23861
		-14.5906	0.460317		-11.9424	0.421693					14.2514	14.1709	14.0902	14.0095	13.9287	13.8479	13.7672	13.6864	13.6057	13.5251	13.4446	13.3642	13.284	13.2039	13.124	13.0443	12.9647	12.8855	12.8064	12.7276	12.6491	12.5709	12.4862	12.4022	12.3189	12.2364	12.1546	12.0734	11.9931	11.9134	11.8344	11.7561	11.6785	11.6017	11.5255	11.4501	11.3754	11.3013	11.2281
		-14.7506	0.462963		-12.1708	0.41164					17.1022	17.0367	16.9688	16.8985	16.8258	16.7508	16.6735	16.5939	16.512	16.4278	16.3414	16.2528	16.1619	16.0689	15.9737	15.8764	15.7713	15.6645	15.556	15.4457	15.3337	15.2199	15.1044	14.9872	14.8684	14.7478	14.6256	14.5018	14.3763	14.2493	14.1207	13.9905	13.8589	13.7258	13.5912	13.4553	13.318	13.1793	13.0394
		-14.9164	0.458428		-12.3753	0.416931					12.9294	12.6734	12.4083	12.1432	11.8782	11.6135	11.3493	11.0857	10.823	10.5612	10.3005	10.0412	9.78331	9.5271	9.27271	9.02029	8.77	8.522	8.27643	8.03345	7.79319	7.55578	7.32137	7.09007	6.862	6.64833	6.43744	6.22946	6.02453	5.82275	5.62426	5.42915	5.23752	5.04945	4.86503	4.68433	4.50742	4.33434	4.16515
		-15.0889	0.457672		-12.5548	0.420635					26.8643	27.0453	27.2205	27.3899	27.5531	27.7101	27.8607	28.0046	28.1418	28.272	28.3952	28.5113	28.62	28.7213	28.8152	28.9015	28.9801	29.0511	29.1143	29.1697	29.2172	29.257	29.2888	29.3128	29.3288	29.3371	29.3375	29.33	29.3148	29.2919	29.2612	29.2229	29.177	29.1236	29.0662	29.0012	28.9288	28.8489	28.7617
		-15.2694	0.456916		-12.7086	0.419048					3.64765	3.62099	3.59495	3.56953	3.54473	3.52055	3.49699	3.47404	3.45172	3.43	3.40889	3.38839	3.36849	3.34918	3.33046	3.31232	3.29475	3.27776	3.26132	3.24543	3.23008	3.21527	3.20098	3.1872	3.17393	3.16114	3.14885	3.13702	3.12565	3.11473	3.10425	3.09419	3.08455	3.07532	3.06647	3.05801	3.04992	3.04219	3.0348
		-15.4594	0.458806		-12.8364	0.413757					15.1688	15.0615	14.9509	14.8369	14.7196	14.5991	14.4755	14.3488	14.219	14.0863	13.9507	13.8123	13.6712	13.5274	13.3811	13.2323	13.0811	12.9276	12.772	12.6143	12.4545	12.2929	12.1295	11.9644	11.7978	11.6297	11.4603	11.2896	11.1178	10.945	10.7713	10.5968	10.4217	10.246	10.0699	9.8935	9.7169	9.54023	9.36359
		-15.6602	0.459562		-12.9384	0.408466					45.0399	45.0375	45.0363	45.0364	45.038	45.0318	45.028	45.027	45.0287	45.0335	45.013	44.9939	44.9765	44.9607	44.9466	44.9343	44.9237	44.915	44.9082	44.9032	44.9002	44.8991	44.8999	44.9026	44.9072	44.9169	44.9283	44.9412	44.9558	44.9718	44.9894	45.0083	45.0286	45.0501	45.0728	45.0965	45.1211	45.1465	45.1726
		-15.8726	0.456916		-13.0154	0.416931					15.6637	15.7753	15.8945	16.021	16.1549	16.2797	16.4106	16.5473	16.6897	16.8376	16.9908	17.1491	17.3122	17.4799	17.652	17.8282	18.0082	18.1919	18.3789	18.569	18.7618	18.957	19.1545	19.3538	19.5546	19.7567	19.9596	20.1632	20.367	20.5707	20.7739	20.9764	21.1778	21.3778	21.5759	21.7719	21.9654	22.1561	22.3436
		-16.0971	0.452759		-13.0687	0.415873					-0.692706	-0.70832	-0.723187	-0.737333	-0.750785	-0.763569	-0.77571	-0.787234	-0.798165	-0.808528	-0.818345	-0.827639	-0.836434	-0.84475	-0.852608	-0.86003	-0.867035	-0.873643	-0.879871	-0.885738	-0.891263	-0.89646	-0.901347	-0.90594	-0.90594	-0.90594	-0.90594	-0.90594	-0.90594	-0.90594	-0.90594	-0.90594	-0.90594	-0.90594	-0.90594	-0.90594	-0.90594	-0.90594	-0.90594
		-16.3334	0.454649		-13.0998	0.420635					25.3248	25.3603	25.3938	25.4251	25.4544	25.4816	25.5123	25.5413	25.5686	25.5942	25.6181	25.6403	25.6609	25.68	25.6974	25.7133	25.7278	25.7407	25.7522	25.7623	25.7711	25.7785	25.7846	25.7894	25.7931	25.7956	25.7969	25.7972	25.7964	25.7947	25.792	25.7884	25.784	25.765	25.7445	25.7223	25.6985	25.6731	25.6461
		-16.5806	0.456916		-13.1102	0.420635					8.12766	8.18407	8.24443	8.30872	8.37691	8.44896	8.52247	8.59964	8.68041	8.76474	8.8526	8.94394	9.03871	9.13686	9.23834	9.3431	9.4623	9.58398	9.70812	9.83471	9.96371	10.0951	10.2288	10.3649	10.5032	10.6438	10.7865	10.9313	11.0783	11.2272	11.3781	11.5309	11.6855	11.8418	11.9999	12.1595	12.3206	12.4832	12.6471
		-16.8372	0.457294		-13.1011	0.426984					12.2756	12.016	11.7584	11.5028	11.2495	10.9983	10.7495	10.5031	10.2592	10.0121	9.76794	9.52681	9.28873	9.05376	8.82193	8.5933	8.36789	8.14576	7.92693	7.71145	7.49934	7.29064	7.07238	6.85839	6.64864	6.44313	6.24182	6.0447	5.85176	5.66297	5.47831	5.29776	5.12129	4.94887	4.78049	4.63653	4.49529	4.3568	4.2211
		-17.1013	0.45994		-13.0734	0.43545					10.6898	10.6344	10.5792	10.5241	10.4693	10.4147	10.3605	10.3068	10.2535	10.2008	10.1487	10.0973	10.0467	10.0103	9.97561	9.9427	9.91168	9.88261	9.8556	9.83074	9.80809	9.78777	9.76984	9.7544	9.74151	9.73128	9.72378	9.71908	9.71728	9.71844	9.72265	9.72998	9.74051	9.75432	9.77149	9.79208	9.79283	9.79636	9.80269
		-17.3706	0.454649		-13.028	0.437566					37.1235	37.2764	37.4235	37.5644	37.6991	37.8274	37.949	38.0637	38.1714	38.272	38.3652	38.4509	38.5289	38.5992	38.6615	38.7158	38.7618	38.7996	38.8289	38.8498	38.862	38.8655	38.8603	38.8462	38.8232	38.7913	38.7503	38.7003	38.6412	38.573	38.4957	38.4093	38.3138	38.2091	38.0954	37.9726	37.8407	37.6998	37.55
		-17.6426	0.450491		-12.9651	0.437566					12.255	12.2927	12.3304	12.368	12.4055	12.4427	12.4797	12.5163	12.5525	12.588	12.623	12.6572	12.6905	12.7229	12.7542	12.7844	12.8133	12.8408	12.8669	12.8914	12.9142	12.9352	12.9542	12.9713	12.9862	12.9988	13.0091	13.017	13.0222	13.0248	13.0247	13.0216	13.0156	13.0065	12.9943	12.9789	12.9601	12.9379	12.9123
		-17.9149	0.450113		-12.8848	0.43545					5.53376	5.55779	5.58262	5.60827	5.63473	5.6644	5.69505	5.72671	5.7594	5.79312	5.82788	5.86371	5.90062	5.93861	5.9777	6.0179	6.05921	6.10165	6.14523	6.18994	6.2358	6.28282	6.33099	6.38031	6.4308	6.48245	6.53525	6.58922	6.64435	6.70063	6.75805	6.81663	6.87634	6.93718	6.99914	7.06222	7.12639	7.19165	7.25799
		-18.1853	0.454649		-12.7865	0.443915					33.6867	33.7624	33.8386	33.9155	33.9928	34.0705	34.1486	34.227	34.3056	34.3843	34.4632	34.542	34.6208	34.6994	34.7779	34.8623	34.9468	35.0314	35.1159	35.2004	35.2871	35.3735	35.4597	35.5456	35.6313	35.7166	35.8017	35.8865	35.9709	36.0551	36.1388	36.2223	36.3054	36.3882	36.462	36.5348	36.6068	36.6778	36.7479
		-18.4515	0.455782		-12.6695	0.448148					2.44153	2.32402	2.20945	2.10117	1.99559	1.89272	1.79254	1.69505	1.60023	1.50808	1.41856	1.33166	1.24736	1.16562	1.08642	1.00974	0.935522	0.86375	0.794381	0.727378	0.662699	0.600303	0.540148	0.482188	0.426379	0.372675	0.321028	0.27139	0.223714	0.17795	0.134049	0.0919618	0.0516384	0.0130289	-0.0239161	-0.0592467	-0.093012	-0.125261	-0.156044
		-18.712	0.447468		-12.533	0.449206					17.7524	17.5988	17.4441	17.2883	17.1313	16.9728	16.8129	16.6515	16.4885	16.3237	16.1572	15.9889	15.8187	15.6466	15.4725	15.2964	15.1182	14.9381	14.7559	14.5717	14.3854	14.1972	14.0069	13.8147	13.6207	13.4247	13.227	13.0276	12.8214	12.6139	12.4053	12.1956	11.9848	11.7732	11.5607	11.3475	11.1337	10.9194	10.7048
		-18.9651	0.44709		-12.3764	0.458201					18.9967	19.1858	19.3746	19.5629	19.7507	19.9379	20.1244	20.3101	20.4951	20.6791	20.8622	21.0442	21.2171	21.3884	21.558	21.7258	21.8917	22.0558	22.2179	22.378	22.5361	22.692	22.8457	22.9973	23.1465	23.2935	23.4381	23.5804	23.7203	23.8577	23.9927	24.1252	24.2551	24.3826	24.5075	24.6298	24.7496	24.8667	24.9813
		-19.2095	0.449358		-12.1993	0.46455					21.869	21.783	21.694	21.6018	21.5066	21.4083	21.307	21.2026	21.0953	20.9851	20.8719	20.7559	20.6372	20.5158	20.3918	20.2653	20.1364	20.0051	19.8717	19.7432	19.6123	19.4791	19.3437	19.2064	19.0673	18.9265	18.7842	18.6405	18.4956	18.3497	18.198	18.0453	17.8917	17.7373	17.5823	17.4268	17.271	17.1149	16.9587
		-19.444	0.447846		-12.0018	0.472487					27.0026	27.1173	27.2323	27.3472	27.4621	27.5766	27.6907	27.8042	27.9171	28.029	28.1236	28.2161	28.3063	28.394	28.4791	28.5613	28.6406	28.7215	28.7989	28.8726	28.9426	29.0087	29.0708	29.1288	29.1827	29.2322	29.2775	29.3182	29.3545	29.3861	29.4131	29.4353	29.4527	29.4653	29.473	29.4757	29.4734	29.4661	29.4536
		-19.6675	0.447846		-11.784	0.480952					26.7861	26.9847	27.1762	27.3606	27.5376	27.7073	27.8694	28.0239	28.1706	28.3095	28.4405	28.5636	28.6786	28.7856	28.8844	28.9751	29.0577	29.132	29.1981	29.256	29.3057	29.3473	29.3806	29.4059	29.423	29.432	29.4331	29.4261	29.4113	29.3886	29.3581	29.3199	29.2741	29.2207	29.1599	29.0917	29.0161	28.9334	28.8436
		-19.8787	0.446712		-11.5468	0.479365					27.3181	27.322	27.3235	27.3223	27.3184	27.3117	27.302	27.2861	27.2672	27.2453	27.2204	27.1922	27.1607	27.1258	27.0875	27.0456	27.0002	26.9511	26.8983	26.8418	26.7814	26.7172	26.6491	26.577	26.5009	26.4209	26.3367	26.2601	26.1786	26.0923	26.0013	25.9055	25.8049	25.6996	25.5896	25.4749	25.3555	25.2314	25.1028
		-20.0764	0.449735		-11.2915	0.479894					22.3336	22.3962	22.4583	22.5196	22.58	22.6395	22.6977	22.7547	22.816	22.8761	22.935	22.9926	23.0489	23.1037	23.1571	23.2089	23.2593	23.3082	23.3555	23.4013	23.4589	23.5142	23.5673	23.6184	23.6674	23.7146	23.76	23.8037	23.8459	23.8675	23.8867	23.9035	23.9179	23.9302	23.9404	23.9485	23.9547	23.959	23.9616
		-20.2594	0.440665		-11.0201	0.472487					10.9388	10.8165	10.6923	10.5663	10.4384	10.3087	10.1774	10.0444	9.9099	9.77391	9.63652	9.4978	9.35784	9.21672	9.07451	8.93132	8.78722	8.6423	8.49667	8.3504	8.20359	8.05634	7.90874	7.76089	7.61288	7.4648	7.31677	7.16886	7.02118	6.87382	6.72688	6.58044	6.4346	6.28946	6.1451	6.00161	5.85907	5.71757	5.5772
		-20.4264	0.439909		-10.7352	0.459788					5.41039	5.271	5.13304	4.99659	4.8617	4.72844	4.59689	4.46708	4.3391	4.21297	4.08877	3.96652	3.84629	3.7281	3.612	3.49803	3.3862	3.27655	3.16911	3.0639	2.96093	2.86021	2.76177	2.66561	2.57174	2.48016	2.39086	2.30385	2.21913	2.13667	2.05648	1.97853	1.90282	1.82932	1.75802	1.68889	1.6219	1.55704	1.49427
		-20.5763	0.436886		-10.4398	0.457143					9.73603	9.54709	9.35957	9.17345	8.98872	8.80535	8.62333	8.44266	8.26333	8.08534	7.90868	7.73338	7.55943	7.38684	7.21563	7.04582	6.87743	6.71047	6.54497	6.38096	6.21846	6.0575	5.89811	5.75617	5.61489	5.47437	5.33467	5.19588	5.05809	4.92138	4.78581	4.65146	4.51841	4.38673	4.25647	4.12772	4.00052	3.87494	3.75104
		-20.7082	0.442177		-10.1371	0.455556					20.622	20.3306	20.0347	19.7346	19.4304	19.1226	18.8115	18.4972	18.1802	17.8608	17.5391	17.2156	16.8905	16.5641	16.2367	15.9086	15.58	15.2513	14.9228	14.5947	14.2672	13.9406	13.6153	13.2913	12.9691	12.6487	12.3305	12.0146	11.7013	11.3908	11.0833	10.779	10.4779	10.1805	9.88666	9.5967	9.31073	9.01363	8.72173
		-20.8217	0.444444		-9.83064	0.459788					14.7741	14.626	14.472	14.3124	14.1473	13.9769	13.8015	13.6211	13.4361	13.2467	13.053	12.8554	12.6539	12.449	12.2408	12.0296	11.8156	11.5991	11.3803	11.1595	10.937	10.713	10.4877	10.2614	10.0344	9.80696	9.57923	9.35149	9.12398	8.89695	8.6706	8.44517	8.22086	7.9979	7.77648	7.5568	7.33904	7.12339	6.91002
		-20.9166	0.448224		-9.52434	0.47037					3.77144	3.63696	3.50486	3.37517	3.24793	3.12318	3.00093	2.88121	2.76405	2.64945	2.53745	2.42803	2.32122	2.21701	2.11541	2.01641	1.92001	1.82619	1.73494	1.64625	1.5601	1.47647	1.39534	1.31668	1.24047	1.16667	1.09525	1.02618	0.959418	0.894937	0.832693	0.772646	0.714754	0.658976	0.605268	0.553585	0.503882	0.456113	0.410231
		-20.9934	0.443689		-9.2225	0.462434					0.840608	0.769098	0.700418	0.6345	0.571276	0.510679	0.452638	0.397084	0.343946	0.293154	0.244636	0.187181	0.132544	0.0806215	0.0313079	-0.0154983	-0.0598964	-0.101984	-0.141857	-0.179609	-0.215328	-0.249104	-0.281023	-0.311168	-0.33962	-0.366456	-0.391753	-0.415585	-0.438022	-0.459132	-0.478982	-0.497635	-0.497635	-0.497635	-0.497635	-0.497635	-0.497635	-0.497635	-0.497635
		-21.0527	0.43424		-8.9296	0.455026					11.8477	11.7172	11.5819	11.442	11.2976	11.1489	10.9961	10.8394	10.679	10.5151	10.3479	10.1777	10.0045	9.82877	9.65059	9.47021	9.28786	9.10375	8.91812	8.73118	8.54317	8.35429	8.16476	7.97482	7.78465	7.59447	7.4045	7.21492	7.02594	6.83774	6.65051	6.46444	6.27968	6.09642	5.91481	5.735	5.55715	5.38138	5.20784
		-21.0959	0.428571		-8.65023	0.45873					9.35204	9.28074	9.21358	9.15058	9.09175	9.0371	8.98662	8.94032	8.89819	8.8602	8.82634	8.79659	8.7709	8.74925	8.73159	8.71787	8.70804	8.70204	8.6998	8.70126	8.70633	8.71494	8.727	8.74242	8.7611	8.78295	8.80784	8.8352	8.86541	8.89835	8.9339	8.97193	9.01229	9.05485	9.09947	9.14599	9.19427	9.24416	9.29549
		-21.1245	0.429705		-8.38883	0.458201					14.9575	14.8954	14.8307	14.7636	14.6942	14.6224	14.5486	14.4726	14.3947	14.3149	14.2334	14.1502	14.0655	13.9792	13.8917	13.8029	13.713	13.622	13.5301	13.4374	13.344	13.25	13.1555	13.0605	12.9653	12.8699	12.7743	12.6788	12.5833	12.4881	12.393	12.2984	12.2042	12.1105	12.0174	11.925	11.8333	11.7385	11.6447
		-21.1404	0.429705		-8.14948	0.461905					14.0645	13.9964	13.9301	13.8657	13.8034	13.7435	13.686	13.6312	13.5793	13.5305	13.4849	13.4427	13.404	13.3691	13.3381	13.3212	13.3091	13.302	13.3001	13.3035	13.3124	13.327	13.3474	13.3738	13.4063	13.445	13.49	13.5415	13.5996	13.6644	13.736	13.8144	13.8973	13.987	14.0837	14.1874	14.2981	14.4159	14.5408
		-21.1453	0.431973		-7.93569	0.457143					23.0381	22.7893	22.5394	22.2885	22.0367	21.784	21.5306	21.2766	21.0221	20.7672	20.5119	20.2564	20.0006	19.7448	19.4889	19.2331	18.9774	18.7218	18.4665	18.2114	17.9444	17.6785	17.4138	17.1502	16.8879	16.6267	16.3667	16.1079	15.8503	15.5939	15.3387	15.0848	14.8321	14.5807	14.3305	14.0817	13.8341	13.5878	13.3494
		-21.1404	0.438398		-7.75025	0.451852					14.952	14.942	14.9296	14.9149	14.8976	14.8776	14.8549	14.8292	14.8005	14.7686	14.7334	14.6949	14.6528	14.6072	14.5579	14.5049	14.448	14.3872	14.3224	14.2536	14.1807	14.1037	14.0123	13.9173	13.8187	13.7166	13.6108	13.5014	13.3883	13.2715	13.1512	13.0273	12.8998	12.7688	12.6344	12.4966	12.3555	12.2111	12.0637
		-21.1265	0.442555		-7.59514	0.457672					6.80153	6.65636	6.51154	6.3671	6.22311	6.0796	5.93663	5.79427	5.65254	5.51152	5.37126	5.23181	5.09323	4.95557	4.8189	4.68325	4.54871	4.4213	4.29472	4.16905	4.04436	3.92072	3.79819	3.67684	3.55674	3.43794	3.32051	3.20451	3.08998	2.97697	2.86555	2.75575	2.64762	2.5412	2.43653	2.33364	2.23256	2.13334	2.03599
		-21.1039	0.441799		-7.47149	0.471429					20.1795	20.2523	20.3207	20.3846	20.4439	20.4987	20.5489	20.5945	20.6355	20.672	20.7038	20.7311	20.7538	20.7719	20.7853	20.7942	20.7985	20.7983	20.7934	20.784	20.7701	20.7515	20.7285	20.7009	20.6687	20.6321	20.5909	20.5452	20.4951	20.4404	20.3812	20.3176	20.2495	20.1769	20.0998	20.0184	19.9324	19.8421	19.7473
		-21.0723	0.436886		-7.37973	0.47037					20.7355	20.5197	20.3038	20.0879	19.8721	19.6563	19.4407	19.2253	19.0101	18.7953	18.5606	18.3276	18.0961	17.8662	17.6378	17.411	17.1856	16.9616	16.739	16.5179	16.298	16.0795	15.8623	15.6651	15.4679	15.2709	15.074	14.8772	14.6807	14.4843	14.2882	14.0923	13.8967	13.7015	13.5065	13.3118	13.1176	12.9237	12.7302
		-21.0314	0.433862		-7.31973	0.459259					21.0073	20.7022	20.394	20.0831	19.7695	19.4535	19.1351	18.8148	18.4926	18.1687	17.8434	17.4949	17.1467	16.7989	16.4518	16.1055	15.76	15.4157	15.0726	14.7309	14.3908	14.0525	13.716	13.3816	13.067	12.7537	12.442	12.132	11.824	11.5181	11.2145	10.9136	10.6153	10.32	10.0278	9.73883	9.4533	9.17135	8.89313
		-20.9803	0.441421		-7.29082	0.456085					19.6605	19.4549	19.233	19.0081	18.7801	18.5491	18.3152	18.0783	17.8386	17.5961	17.3509	17.1031	16.8528	16.6	16.3449	16.0877	15.8283	15.567	15.304	15.0393	14.7852	14.5291	14.2711	14.0114	13.7502	13.4877	13.2241	12.9597	12.6946	12.4291	12.1633	11.8975	11.6319	11.3667	11.102	10.8381	10.5752	10.3134	10.053
		-20.918	0.440665		-7.29174	0.462434					-0.720333	-0.750736	-0.779341	-0.806238	-0.831513	-0.831513	-0.831513	-0.831513	-0.831513	-0.831513	-0.831513	-0.831513	-0.831513	-0.831513	-0.831513	-0.831513	-0.831513	-0.831513	-0.831513	-0.831513	-0.831513	-0.831513	-0.831513	-0.831513	-0.831513	-0.831513	-0.831513	-0.831513	-0.831513	-0.831513	-0.831513	-0.831513	-0.831513	-0.831513	-0.831513	-0.831513	-0.831513	-0.831513	-0.831513
		-20.8431	0.438775		-7.32069	0.471429					3.59585	3.43878	3.28518	3.13506	2.98842	2.84526	2.70556	2.56931	2.44366	2.321	2.20133	2.08465	1.97096	1.86024	1.7525	1.64771	1.54586	1.44693	1.35089	1.25772	1.16738	1.07986	0.995104	0.913086	0.833765	0.757101	0.68305	0.611568	0.54261	0.476127	0.412071	0.350392	0.291039	0.23396	0.179102	0.126411	0.0758337	0.0273154	-0.0191986
		-20.754	0.442177		-7.3755	0.473545					23.3306	23.4477	23.5616	23.6723	23.7795	23.8832	23.9833	24.0797	24.1723	24.2611	24.346	24.4269	24.5036	24.5762	24.6446	24.7086	24.7683	24.8236	24.8743	24.9205	24.9621	24.999	25.0311	25.0585	25.081	25.0987	25.1114	25.1191	25.1218	25.1195	25.112	25.0994	25.0817	25.0587	25.0305	24.9969	24.9581	24.914	24.8645
		-20.649	0.443689		-7.45385	0.467725					13.9333	13.9173	13.9026	13.8893	13.8773	13.8667	13.8575	13.8495	13.8429	13.8376	13.8336	13.8309	13.8295	13.8293	13.8305	13.8329	13.8366	13.8416	13.8478	13.8553	13.864	13.874	13.8852	13.8976	13.9114	13.9263	13.9425	13.9599	13.9785	13.9984	14.0238	14.0501	14.0774	14.1057	14.135	14.1653	14.1966	14.2289	14.2622
		-20.5262	0.439531		-7.5534	0.470899					-1.47565	-1.47565	-1.47565	-1.47565	-1.47565	-1.47565	-1.47565	-1.47565	-1.47565	-1.47565	-1.47565	-1.47565	-1.47565	-1.47565	-1.47565	-1.47565	-1.47565	-1.47565	-1.47565	-1.47565	-1.47565	-1.47565	-1.47565	-1.47565	-1.47565	-1.47565	-1.47565	-1.47565	-1.47565	-1.47565	-1.47565	-1.47565	-1.47565	-1.47565	-1.47565	-1.47565	-1.47565	-1.47565	-1.47565
		-20.3837	0.439531		-7.67172	0.468254					1.78234	1.85817	1.93737	2.02003	2.10626	2.19616	2.28982	2.36839	2.44972	2.53385	2.62082	2.71066	2.8034	2.89905	2.99765	3.09919	3.2037	3.31118	3.42162	3.53503	3.6514	3.7707	3.89292	4.01803	4.14599	4.27677	4.41032	4.54659	4.68552	4.82704	4.97107	5.11755	5.26637	5.41746	5.5707	5.72598	5.8832	6.04223	6.20294
		-20.2206	0.437264		-7.80626	0.461376					15.4445	15.3905	15.3351	15.2782	15.2198	15.1598	15.098	15.0345	14.9692	14.9019	14.8327	14.7614	14.6879	14.6123	14.5344	14.4542	14.3717	14.2867	14.1992	14.1092	14.0166	13.9112	13.8039	13.6944	13.5828	13.469	13.353	13.2348	13.1142	12.9913	12.866	12.7385	12.6086	12.4763	12.3417	12.2049	12.0657	11.9243	11.7807
		-20.0367	0.442177		-7.95435	0.458201					16.6636	16.852	17.0417	17.2325	17.4243	17.6168	17.8101	18.0038	18.1979	18.3923	18.5866	18.7808	18.9747	19.1682	19.361	19.553	19.7441	19.9339	20.1225	20.3096	20.4949	20.6785	20.86	21.0393	21.2163	21.3907	21.5625	21.7314	21.8972	22.06	22.2194	22.3753	22.5276	22.6762	22.8209	22.9616	23.0982	23.2217	23.3404
		-19.8326	0.447468		-8.11328	0.460317					8.26695	8.21524	8.16489	8.1162	8.06878	8.02259	7.97759	7.93373	7.89098	7.84929	7.80861	7.7689	7.73011	7.6922	7.65512	7.61882	7.58326	7.5484	7.51417	7.48054	7.44747	7.41489	7.38278	7.35107	7.31974	7.28872	7.25799	7.22749	7.19719	7.16703	7.13699	7.10701	7.07707	7.04713	7.01713	6.98707	6.95689	6.92656	6.89605
		-19.6102	0.447846		-8.2805	0.463492					10.2374	10.3313	10.4241	10.5157	10.6058	10.6945	10.7815	10.8669	10.9504	11.0321	11.1118	11.1893	11.2647	11.3377	11.4084	11.4767	11.5424	11.6055	11.666	11.7237	11.7786	11.8306	11.8797	11.9258	11.9689	12.009	12.046	12.0878	12.127	12.1636	12.1976	12.229	12.2578	12.2841	12.308	12.3294	12.3485	12.3653	12.3798
		-19.3723	0.447468		-8.45379	0.460847					25.5873	25.4649	25.3453	25.2285	25.1148	25.004	24.8963	24.7917	24.6902	24.5918	24.4966	24.4045	24.3154	24.2295	24.1311	24.0367	23.9461	23.8592	23.7759	23.6961	23.6195	23.5461	23.4758	23.4083	23.3435	23.2813	23.2215	23.164	23.1085	23.055	23.0032	22.9529	22.9015	22.8515	22.8027	22.755	22.708	22.6617	22.6159
		-19.1222	0.444444		-8.63137	0.461905					19.191	19.4253	19.6542	19.8775	20.0948	20.306	20.5108	20.7091	20.9006	21.0852	21.2626	21.4327	21.5953	21.7503	21.8974	22.0367	22.1679	22.291	22.4058	22.5122	22.6102	22.6998	22.7807	22.8531	22.9168	22.9719	23.0182	23.0559	23.0849	23.1053	23.117	23.1202	23.1148	23.1009	23.0785	23.0479	23.0089	22.9618	22.9066
		-18.8636	0.439909		-8.81207	0.466138					6.96155	6.85412	6.74601	6.63722	6.52779	6.41772	6.30704	6.19576	6.08392	5.97155	5.85868	5.74535	5.63789	5.52965	5.4207	5.3111	5.20092	5.09022	4.97907	4.86753	4.75569	4.64359	4.53133	4.41895	4.30654	4.19417	4.0819	3.96981	3.85796	3.74643	3.63528	3.52458	3.4144	3.3048	3.19585	3.08761	2.98015	2.87352	2.76779
		-18.6003	0.43802		-8.99545	0.466138					8.19136	8.20658	8.22264	8.23957	8.25737	8.27609	8.29573	8.31632	8.33789	8.36045	8.38403	8.40864	8.43429	8.46102	8.48883	8.51775	8.54777	8.57893	8.60475	8.63131	8.6586	8.6866	8.71531	8.7447	8.77474	8.80543	8.83673	8.86861	8.90105	8.93401	8.96747	9.00137	9.03569	9.07037	9.10539	9.14068	9.17619	9.21189	9.24771
		-18.3363	0.432729		-9.18173	0.468254					11.6392	11.7611	11.8789	11.9924	12.1013	12.2055	12.3048	12.3988	12.4876	12.5708	12.6484	12.7201	12.7857	12.8453	12.8985	12.9453	12.9856	13.0193	13.0462	13.0664	13.0796	13.086	13.0853	13.0777	13.0631	13.0415	13.0128	12.9772	12.9346	12.8851	12.8288	12.7657	12.6959	12.6196	12.5368	12.4476	12.3522	12.2507	12.1432
		-18.0751	0.439909		-9.3717	0.471958					17.5476	17.4863	17.4293	17.3765	17.3282	17.2843	17.2449	17.2101	17.18	17.1547	17.134	17.1182	17.1073	17.1013	17.1035	17.1105	17.1223	17.1388	17.1601	17.1862	17.217	17.2526	17.293	17.3379	17.3876	17.4417	17.5004	17.5635	17.6309	17.7025	17.7782	17.8578	17.9413	18.0285	18.1192	18.2132	18.3103	18.4105	18.5133
		-17.8198	0.451247		-9.56648	0.479365					4.24727	4.08519	3.92759	3.77444	3.62572	3.48139	3.34143	3.20579	3.07176	2.94211	2.81679	2.69573	2.57886	2.46611	2.3574	2.25266	2.1518	2.05476	1.96143	1.87174	1.78559	1.70292	1.62361	1.5476	1.47477	1.40506	1.33836	1.27459	1.21366	1.15548	1.09996	1.04338	0.98952	0.938268	0.889531	0.843214	0.799225	0.757472	0.717868
		-17.5734	0.460317		-9.76743	0.477249					6.51146	6.36297	6.21551	6.06915	5.92394	5.77993	5.63718	5.49575	5.35568	5.21704	5.07988	4.94424	4.81017	4.67773	4.54696	4.41791	4.29062	4.16513	4.04624	3.92893	3.81327	3.69929	3.58704	3.47657	3.36791	3.2611	3.15618	3.05318	2.95212	2.85303	2.75593	2.66085	2.56779	2.47678	2.38781	2.30091	2.21608	2.13331	2.05261
		-17.338	0.453893		-9.97598	0.471958					19.4054	19.0971	18.786	18.4723	18.1564	17.8385	17.5188	17.1976	16.8751	16.5517	16.2275	15.9028	15.5698	15.2373	14.9055	14.5746	14.245	13.9167	13.5901	13.2652	12.9424	12.6218	12.3036	11.988	11.6751	11.3653	11.0585	10.755	10.4551	10.1587	9.86604	9.57731	9.29262	9.01208	8.73582	8.46064	8.19016	7.92445	7.66361
		-17.1155	0.449735		-10.1934	0.471429					-1.11902	-1.11902	-1.11902	-1.11902	-1.11902	-1.11902	-1.11902	-1.11902	-1.11902	-1.11902	-1.11902	-1.11902	-1.11902	-1.11902	-1.11902	-1.11902	-1.11902	-1.11902	-1.11902	-1.11902	-1.11902	-1.11902	-1.11902	-1.11902	-1.11902	-1.11902	-1.11902	-1.11902	-1.11902	-1.11902	-1.11902	-1.11902	-1.11902	-1.11902	-1.11902	-1.11902	-1.11902	-1.11902	-1.11902
		-16.9073	0.447468		-10.4206	0.457672					4.79585	4.79585	4.79585	4.79585	4.79585	4.79585	4.79585	4.79585	4.79585	4.79585	4.79585	4.79585	4.79585	4.79585	4.79585	4.79585	4.79585	4.79585	4.79585	4.79336	4.79071	4.78789	4.7849	4.78173	4.77836	4.77479	4.771	4.767	4.76276	4.75828	4.75354	4.74853	4.74325	4.73768	4.73181	4.72562	4.7191	4.71224	4.70503
		-16.7147	0.448224		-10.6581	0.450794					5.55615	5.37404	5.19571	5.02116	4.85042	4.68348	4.52036	4.36104	4.20553	4.05382	3.90589	3.76173	3.62133	3.48466	3.35169	3.2224	3.09676	2.97473	2.85627	2.74135	2.62992	2.52755	2.42824	2.33195	2.23866	2.14832	2.06089	1.97634	1.89462	1.81569	1.7395	1.66599	1.59513	1.52685	1.46111	1.39784	1.337	1.27853	1.22236
		-16.5385	0.450113		-10.9057	0.45291					14.2651	14.1156	13.9639	13.8101	13.6543	13.4965	13.3368	13.1753	13.012	12.8471	12.6805	12.5123	12.3427	12.1717	11.9994	11.8258	11.651	11.4751	11.2982	11.1204	10.9417	10.7622	10.5821	10.4013	10.22	10.0383	9.85615	9.67376	9.4912	9.30853	9.12584	8.94324	8.76079	8.57859	8.39673	8.21529	8.02787	7.84144	7.65608
		-16.3793	0.461451		-11.1627	0.459788					6.74128	6.52236	6.30644	6.09366	5.88411	5.67792	5.47517	5.27595	5.08036	4.88846	4.70032	4.51602	4.33559	4.15909	3.98656	3.81803	3.65353	3.49307	3.33668	3.18435	3.03609	2.89188	2.75173	2.61561	2.4835	2.35536	2.23118	2.11091	1.99452	1.88194	1.77314	1.66806	1.56665	1.46884	1.37458	1.28379	1.19641	1.11191	1.03071
		-16.2374	0.464475		-11.4275	0.453968					24.162	24.0124	23.882	23.7546	23.6304	23.5094	23.3917	23.2773	23.1662	23.0586	22.9545	22.8538	22.7566	22.663	22.573	22.4865	22.4036	22.3243	22.2486	22.1765	22.108	22.043	21.9816	21.9236	21.8691	21.818	21.7703	21.7259	21.6848	21.6468	21.6119	21.58	21.5459	21.515	21.4871	21.462	21.4397	21.42	21.4026
		-16.113	0.456538		-11.6985	0.440741					12.5758	12.6117	12.6503	12.6917	12.7358	12.7827	12.8324	12.8848	12.94	12.998	13.0588	13.1223	13.1886	13.2576	13.3293	13.4038	13.4809	13.5607	13.643	13.7279	13.8154	13.9053	13.9976	14.0943	14.1832	14.2735	14.3653	14.4583	14.5526	14.648	14.7443	14.8415	14.9395	15.038	15.1371	15.2364	15.336	15.4357	15.5352
		-16.006	0.45994		-11.9739	0.442857					12.7403	12.6073	12.4763	12.3474	12.2207	12.096	11.9735	11.8531	11.7347	11.6183	11.504	11.3916	11.2812	11.1727	11.066	10.9611	10.8579	10.7564	10.6536	10.5525	10.4531	10.3552	10.2589	10.1639	10.0703	9.97791	9.88669	9.79654	9.70738	9.61913	9.53169	9.44499	9.35893	9.27345	9.18846	9.10387	9.00962	8.91624	8.82361
		-15.9161	0.463341		-12.2516	0.442857					9.11524	9.14425	9.17258	9.20022	9.22712	9.25326	9.27862	9.30315	9.32682	9.34962	9.3715	9.39243	9.41239	9.43132	9.44921	9.46602	9.48171	9.49625	9.5096	9.52173	9.5326	9.54217	9.55041	9.55728	9.56275	9.56678	9.56933	9.57037	9.56986	9.56776	9.56405	9.55868	9.55162	9.54284	9.53231	9.51999	9.50585	9.48986	9.47199
		-15.8427	0.461829		-12.5296	0.442328					18.4425	18.2339	18.0253	17.8168	17.6083	17.3998	17.1911	16.9823	16.7733	16.5641	16.3546	16.1448	15.9414	15.7372	15.5323	15.3266	15.1203	14.9133	14.7057	14.4974	14.2885	14.0791	13.8692	13.6588	13.4479	13.2368	13.0253	12.8135	12.6016	12.3896	12.1775	11.9654	11.7534	11.5416	11.3301	11.1189	10.9081	10.6978	10.4881
		-15.7849	0.45994		-12.8057	0.447619					7.1742	7.15102	7.12773	7.10433	7.0808	7.05713	7.0333	7.00929	6.9851	6.96071	6.93609	6.91123	6.88611	6.86072	6.83503	6.80902	6.78268	6.75597	6.72889	6.7014	6.6735	6.64515	6.61633	6.58702	6.5572	6.52685	6.49594	6.46445	6.43237	6.39966	6.36631	6.3323	6.29761	6.26222	6.2261	6.18925	6.15163	6.11325	6.07407
		-15.7414	0.458806		-13.0775	0.452381					12.5933	12.4817	12.3717	12.2633	12.1563	12.0507	11.9465	11.8436	11.7419	11.6414	11.5519	11.4629	11.3743	11.2861	11.1983	11.1109	11.0238	10.937	10.8504	10.7642	10.6781	10.5922	10.5065	10.421	10.3355	10.2502	10.1649	10.0796	9.99439	9.90915	9.82388	9.73857	9.65319	9.56773	9.48218	9.39651	9.31072	9.22481	9.13875
		-15.7111	0.45805		-13.3425	0.453968					14.5158	14.6215	14.7317	14.8463	14.9654	15.0888	15.2167	15.3488	15.4853	15.626	15.771	15.9201	16.0732	16.2304	16.3914	16.5582	16.7286	16.9026	17.0799	17.2605	17.4442	17.631	17.8206	18.013	18.208	18.4054	18.605	18.8068	19.0105	19.2159	19.4229	19.6312	19.8406	20.051	20.2622	20.4738	20.6858	20.8978	21.1097
		-15.6924	0.454271		-13.5982	0.465079					7.13045	7.22667	7.32181	7.41571	7.50823	7.59925	7.68861	7.77618	7.86182	7.94538	8.02673	8.10574	8.18226	8.25617	8.32734	8.39564	8.46096	8.52316	8.58214	8.63778	8.68998	8.73864	8.78366	8.82496	8.86244	8.89603	8.92566	8.95126	8.97277	8.99013	9.00331	9.01227	9.01697	9.01739	9.01351	9.00533	8.99285	8.97606	8.95499
		-15.684	0.457672		-13.8419	0.467725					1.63726	1.60571	1.57569	1.54714	1.52001	1.49424	1.46978	1.44658	1.42459	1.40376	1.38403	1.36537	1.34772	1.33104	1.31529	1.30042	1.2864	1.27318	1.26073	1.24901	1.23797	1.2276	1.21786	1.21786	1.21786	1.21786	1.21786	1.21786	1.21786	1.21786	1.21786	1.21786	1.21786	1.21786	1.21786	1.21786	1.21786	1.21786	1.21786
		-15.6848	0.455404		-14.0715	0.467725					21.9367	21.5942	21.2484	20.8998	20.5486	20.1951	19.8397	19.4826	19.1241	18.7646	18.4043	18.0435	17.6826	17.3219	16.9615	16.6019	16.2433	15.8859	15.5302	15.1774	14.8267	14.4782	14.1323	13.7891	13.4489	13.112	12.7785	12.4487	12.1227	11.8008	11.4831	11.1698	10.861	10.557	10.2579	9.96371	9.67465	9.39082	9.11231
		-15.6946	0.445956		-14.2851	0.473545					12.5214	12.4526	12.3833	12.3137	12.2436	12.1729	12.1018	12.03	11.9576	11.8846	11.8109	11.7364	11.6612	11.5852	11.5141	11.4417	11.3681	11.2934	11.2174	11.1403	11.0619	10.9823	10.9015	10.8195	10.7362	10.6518	10.5661	10.4793	10.3912	10.302	10.2116	10.12	10.0273	9.93347	9.83852	9.74249	9.64539	9.54725	9.44809
		-15.7134	0.443311		-14.4812	0.474603					20.5756	20.5275	20.4887	20.4447	20.3958	20.3419	20.2833	20.22	20.1523	20.0804	20.0043	19.9244	19.8407	19.7536	19.6633	19.5699	19.4738	19.3752	19.2744	19.1716	19.0671	18.9612	18.8542	18.7292	18.6025	18.4745	18.3454	18.2154	18.0848	17.9538	17.8227	17.6918	17.5611	17.4311	17.3019	17.1737	17.0469	16.9215	16.7978
		-15.7417	0.447468		-14.6586	0.473016					23.4288	23.0891	22.7469	22.4024	22.0558	21.7074	21.3534	20.9984	20.6425	20.2861	19.9293	19.5724	19.2157	18.8592	18.5034	18.1484	17.7944	17.4416	17.0904	16.7408	16.3931	16.0474	15.7041	15.3633	15.0251	14.6898	14.3575	14.0284	13.7027	13.3805	13.07	12.7629	12.4592	12.1592	11.863	11.5708	11.2825	10.9985	10.7188
		-15.7805	0.453137		-14.8165	0.473545					12.2698	12.3492	12.4277	12.5052	12.5815	12.6566	12.7303	12.8027	12.8736	12.9429	13.0105	13.0763	13.1403	13.2024	13.2624	13.3203	13.376	13.4295	13.4805	13.5292	13.5753	13.6188	13.6596	13.6977	13.733	13.7653	13.7947	13.821	13.8443	13.8644	13.8813	13.8949	13.9052	13.9122	13.9157	13.9157	13.9122	13.9052	13.8946
		-15.8309	0.446712		-14.9543	0.469312					12.9513	13.0425	13.1312	13.2173	13.3009	13.3817	13.4598	13.535	13.6073	13.6767	13.743	13.8063	13.8664	13.9234	13.9771	14.0276	14.0747	14.1185	14.159	14.196	14.2296	14.2598	14.2865	14.3097	14.3294	14.3457	14.3584	14.3675	14.3732	14.3754	14.374	14.3692	14.3609	14.3491	14.3339	14.3152	14.2931	14.2677	14.2389
		-15.8939	0.441421		-15.0716	0.47037					7.20837	7.03505	6.86464	6.69717	6.5327	6.37125	6.21286	6.05755	5.90535	5.75627	5.61034	5.46756	5.32796	5.19152	5.05827	4.92819	4.80128	4.67753	4.55695	4.4395	4.32518	4.21397	4.10584	4.00077	3.89873	3.79969	3.70362	3.61049	3.52379	3.43974	3.3583	3.27944	3.20312	3.12931	3.05798	2.98907	2.92256	2.8584	2.79654
		-15.9704	0.442177		-15.1682	0.466138					6.81667	6.79206	6.76687	6.74109	6.71474	6.68782	6.66034	6.65533	6.65122	6.64812	6.64611	6.64527	6.64572	6.64755	6.65086	6.65576	6.66236	6.67078	6.68113	6.69354	6.70813	6.72503	6.74437	6.76629	6.76743	6.76993	6.77386	6.77928	6.78626	6.79486	6.80516	6.81719	6.83104	6.84676	6.8644	6.88402	6.90568	6.92943	6.9553
		-16.0613	0.439531		-15.2441	0.465608					12.4378	12.2456	12.0559	11.869	11.6849	11.5037	11.3255	11.1505	10.9787	10.8103	10.6452	10.4836	10.3255	10.171	10.02	9.87279	9.7292	9.58932	9.45315	9.32069	9.19196	9.06694	8.94562	8.82798	8.71401	8.60366	8.49692	8.39373	8.29406	8.19786	8.10509	8.01567	7.92957	7.84834	7.7702	7.69509	7.62293	7.55367	7.48725
		-16.1671	0.437642		-15.2994	0.459788					18.0831	18.3799	18.6735	18.9634	19.2493	19.5308	19.8074	20.0789	20.3447	20.6057	20.8603	21.108	21.3486	21.5816	21.8067	22.0237	22.2321	22.4316	22.6219	22.8027	22.9738	23.1349	23.2856	23.4259	23.5554	23.674	23.7814	23.8775	23.9621	24.0351	24.0963	24.1458	24.1833	24.2089	24.2224	24.224	24.2134	24.1909	24.1563
		-16.2886	0.431973		-15.3346	0.459788					17.5078	17.6202	17.7287	17.8333	17.9339	18.0306	18.1232	18.2117	18.2962	18.3764	18.4525	18.5244	18.5921	18.6555	18.7146	18.7694	18.8199	18.8661	18.908	18.9455	18.9787	19.0075	19.0319	19.0519	19.0676	19.0789	19.0859	19.0885	19.0867	19.0805	19.07	19.0551	19.0359	19.0124	18.9846	18.9524	18.916	18.8752	18.8303
		-16.4262	0.430083		-15.3498	0.468254					11.9678	11.9325	11.894	11.8522	11.8072	11.7591	11.7078	11.6534	11.596	11.5355	11.4722	11.406	11.337	11.2653	11.191	11.1141	11.0348	10.953	10.8691	10.7829	10.6947	10.6046	10.5126	10.4188	10.3235	10.2266	10.1283	10.0287	9.92907	9.82829	9.72653	9.62391	9.52055	9.41657	9.32667	9.23731	9.14866	9.06089	8.97417
		-16.5806	0.43613		-15.3454	0.473545					12.6307	12.5854	12.5426	12.5024	12.4649	12.4301	12.3982	12.3693	12.3432	12.3203	12.3004	12.2837	12.2703	12.2601	12.2532	12.2498	12.2498	12.2533	12.2604	12.2599	12.2623	12.2676	12.276	12.2872	12.3014	12.3185	12.3386	12.3585	12.3815	12.4076	12.4367	12.4687	12.5037	12.5416	12.5823	12.6259	12.6722	12.7211	12.7727
		-16.7523	0.439531		-15.3215	0.474074					7.64339	7.50349	7.36667	7.23299	7.10246	6.98981	6.88127	6.77691	6.67677	6.58092	6.4894	6.40225	6.31951	6.24123	6.16745	6.09819	6.0335	5.97341	5.91794	5.86712	5.821	5.77958	5.74291	5.711	5.68389	5.66158	5.64412	5.63153	5.62383	5.62104	5.62319	5.6303	5.63013	5.62524	5.62512	5.62972	5.63899	5.65289	5.67137
		-16.9418	0.439153		-15.2784	0.475132					17.9092	17.6801	17.4498	17.2184	16.9862	16.7532	16.5197	16.2857	16.0516	15.8173	15.5831	15.3346	15.0873	14.8414	14.597	14.3542	14.1131	13.8737	13.6363	13.4009	13.1675	12.9364	12.7075	12.481	12.257	12.0356	11.8168	11.6008	11.3876	11.1772	10.9698	10.7655	10.5643	10.3726	10.1838	9.99785	9.8149	9.635	9.45821
		-17.1496	0.445578		-15.2161	0.479365					23.551	23.4827	23.4114	23.3372	23.2604	23.181	23.0994	23.0157	22.9238	22.8298	22.7339	22.6362	22.537	22.4363	22.3344	22.2314	22.1275	22.0228	21.9174	21.8116	21.7054	21.599	21.4925	21.3861	21.2797	21.1736	21.0679	20.9625	20.8577	20.7535	20.65	20.5472	20.4452	20.344	20.2437	20.1443	20.0458	19.9483	19.8518
		-17.3759	0.444444		-15.135	0.485185					10.1523	10.0184	9.88549	9.75357	9.6226	9.49254	9.3634	9.23516	9.1078	8.98132	8.85571	8.73099	8.60714	8.48418	8.37846	8.27264	8.16678	8.06096	7.95524	7.84968	7.74436	7.63933	7.53466	7.43041	7.32665	7.22344	7.12085	7.01892	6.91772	6.81731	6.71775	6.61908	6.52137	6.42465	6.32899	6.23443	6.14102	6.04879	5.95779
		-17.6204	0.440665		-15.0356	0.484656					4.42794	4.42298	4.41815	4.41346	4.4089	4.40447	4.40017	4.396	4.39195	4.38803	4.38214	4.37624	4.37032	4.36437	4.35839	4.35236	4.34627	4.34011	4.33388	4.32755	4.32113	4.31459	4.30792	4.30113	4.29418	4.28707	4.27978	4.27231	4.26464	4.25675	4.24863	4.24027	4.23165	4.22276	4.21359	4.20411	4.19433	4.18421	4.17374
		-17.882	0.440665		-14.9187	0.484656					3.77469	3.71661	3.6609	3.60459	3.5507	3.49917	3.44993	3.40289	3.358	3.31517	3.27434	3.23545	3.19841	3.16318	3.12967	3.09782	3.06758	3.03887	3.01164	2.98583	2.96137	2.93822	2.91631	2.89559	2.87602	2.85753	2.84008	2.82362	2.8081	2.79349	2.77973	2.76678	2.75461	2.74317	2.74317	2.74317	2.74317	2.74317	2.74317
		-18.1591	0.441043		-14.7855	0.47619					8.58984	8.66649	8.7428	8.81862	8.89384	8.96832	9.04194	9.11454	9.18601	9.25621	9.32499	9.39223	9.45778	9.52151	9.58329	9.64298	9.70045	9.75556	9.80819	9.85822	9.90551	9.94996	9.99143	10.0298	10.065	10.097	10.1255	10.1505	10.172	10.1898	10.2038	10.214	10.2204	10.2228	10.2213	10.2157	10.206	10.1922	10.1743
		-18.4489	0.43802		-14.6371	0.479365					6.2993	6.35234	6.4075	6.46478	6.52417	6.5857	6.64936	6.71776	6.78813	6.86046	6.93477	7.01103	7.08925	7.16942	7.2515	7.3355	7.42137	7.50909	7.59863	7.68995	7.78301	7.87775	7.97412	8.07207	8.17154	8.27245	8.37473	8.4783	8.58309	8.689	8.79594	8.90381	9.01251	9.12193	9.23196	9.34248	9.45336	9.56449	9.67573
		-18.748	0.437642		-14.4745	0.489947					12.6939	12.4848	12.277	12.0706	11.8657	11.6623	11.4605	11.2604	11.062	10.8655	10.6709	10.4811	10.2933	10.1073	9.92338	9.74154	9.56186	9.3844	9.20924	9.03642	8.86601	8.69807	8.53264	8.36978	8.20954	8.05195	7.89706	7.7449	7.59551	7.44892	7.30515	7.16423	7.02618	6.89102	6.75875	6.6294	6.50297	6.37945	6.25886
		-19.0528	0.443311		-14.2984	0.490476					9.08587	9.06675	9.0465	9.02518	9.00283	8.97951	8.95526	8.93013	8.90418	8.87746	8.85001	8.82189	8.79314	8.76383	8.73399	8.70367	8.67293	8.64181	8.61037	8.57864	8.54667	8.5145	8.48219	8.44977	8.41728	8.38477	8.35228	8.31983	8.28747	8.25524	8.22316	8.19128	8.15962	8.12821	8.09708	8.06626	8.03578	8.00565	7.97591
		-19.3595	0.441043		-14.1094	0.491005					39.0852	39.1052	39.1119	39.1056	39.0863	39.0541	39.0092	38.9517	38.8818	38.7997	38.7056	38.5996	38.482	38.3529	38.2127	38.0615	37.8995	37.7271	37.5444	37.3517	37.1493	36.9375	36.7165	36.4865	36.2479	36.001	35.7459	35.4831	35.2126	34.935	34.6503	34.359	34.0612	33.7572	33.4474	33.132	32.8113	32.4855	32.1549
		-19.665	0.440287		-13.9079	0.488889					21.4049	21.6485	21.8857	22.1163	22.34	22.5565	22.7655	22.9669	23.1605	23.3459	23.5229	23.6915	23.8513	24.0023	24.1443	24.2771	24.4005	24.5146	24.6191	24.714	24.7992	24.8746	24.9403	24.9961	25.042	25.078	25.1042	25.1206	25.1272	25.124	25.1111	25.0887	25.0567	25.0153	24.9645	24.9046	24.8357	24.7579	24.6713
		-19.9663	0.434618		-13.6946	0.491534					11.1023	10.885	10.6727	10.4653	10.2629	10.0654	9.87282	9.68517	9.50242	9.26653	9.03906	8.81978	8.60848	8.40494	8.21484	8.03245	7.91033	7.7923	7.67837	7.56852	7.52876	7.49724	7.47416	7.45974	7.45417	7.45768	7.47051	7.4442	7.42459	7.41174	7.40576	7.40671	7.41469	7.4298	7.45211	7.48172	7.51872	7.56321	7.61528
		-20.2612	0.429327		-13.4702	0.491534					5.82499	5.89943	5.97456	6.0504	6.127	6.20437	6.28257	6.36161	6.44154	6.52239	6.60419	6.68699	6.77081	6.8557	6.94169	7.02882	7.11712	7.20663	7.29738	7.38941	7.48275	7.57033	7.65883	7.74826	7.83864	7.92995	8.02221	8.11541	8.20955	8.30461	8.4006	8.4975	8.5953	8.69397	8.7935	8.89386	8.99503	9.09698	9.19967
		-20.5478	0.430461		-13.2358	0.487302					2.37288	2.37288	2.37288	2.37569	2.37867	2.38185	2.38522	2.3888	2.3926	2.39663	2.40089	2.40541	2.41019	2.41525	2.42059	2.42623	2.43219	2.43847	2.4451	2.45208	2.45943	2.46716	2.47529	2.48384	2.49281	2.50223	2.51212	2.52248	2.53333	2.54469	2.55658	2.56902	2.59329	2.61886	2.64577	2.67409	2.70387	2.73517	2.76804
		-20.8244	0.429327		-12.993	0.475661					1.76897	1.74647	1.72532	1.70544	1.70544	1.70544	1.70544	1.70544	1.70544	1.70544	1.70544	1.70544	1.70544	1.70544	1.70544	1.70544	1.70544	1.70544	1.70544	1.70544	1.70544	1.70544	1.70544	1.70544	1.70544	1.70544	1.70544	1.70544	1.70544	1.70544	1.70544	1.70544	1.70544	1.70544	1.70544	1.70544	1.70544	1.70544	1.70544
		-21.0892	0.434618		-12.7434	0.47619					28.8223	28.7881	28.7487	28.7042	28.6548	28.6007	28.542	28.4789	28.4117	28.3404	28.2652	28.1864	28.1041	28.0184	27.9297	27.8381	27.7437	27.6468	27.5475	27.446	27.3426	27.2373	27.1304	27.0177	26.9034	26.7878	26.6709	26.553	26.4341	26.3145	26.1942	26.0734	25.9523	25.8309	25.7094	25.5879	25.4665	25.3453	25.2244
		-21.3406	0.431595		-12.4891	0.486243					18.7381	18.9249	19.113	19.3023	19.4925	19.6818	19.8718	20.0622	20.2587	20.4556	20.6527	20.8499	21.047	21.2436	21.4398	21.6351	21.8296	22.0228	22.2148	22.4052	22.5939	22.7806	22.9653	23.1477	23.3276	23.5049	23.6794	23.851	24.0195	24.1847	24.3466	24.505	24.6598	24.8108	24.958	25.1013	25.2368	25.368	25.4949
		-21.5769	0.436886		-12.2327	0.47619					17.5754	17.4129	17.2481	17.0813	16.9127	16.7426	16.5712	16.3987	16.2254	16.0514	15.877	15.7025	15.528	15.3537	15.1798	15.0066	14.8341	14.6627	14.4943	14.3273	14.1619	13.9983	13.8366	13.677	13.5197	13.3646	13.212	13.062	12.9147	12.7702	12.6285	12.4898	12.3542	12.2216	12.0922	11.966	11.8431	11.7235	11.6073
		-21.797	0.430461		-11.9768	0.471429					21.5861	21.5409	21.4919	21.439	21.3819	21.3206	21.2551	21.185	21.1104	21.0312	20.9472	20.8584	20.7646	20.6659	20.5621	20.4533	20.3393	20.2202	20.0958	19.9663	19.8315	19.6916	19.5465	19.3962	19.2408	19.0804	18.915	18.7446	18.5694	18.3894	18.2048	18.0156	17.822	17.6241	17.422	17.2159	17.0059	16.7922	16.575
		-22.0001	0.42328		-11.7241	0.460847					18.6985	18.6714	18.6428	18.6128	18.5816	18.5492	18.5159	18.4817	18.4469	18.4116	18.3759	18.34	18.2955	18.2505	18.2052	18.1596	18.1138	18.0681	18.0224	17.9768	17.9315	17.8866	17.8421	17.7981	17.7547	17.7119	17.67	17.6288	17.5884	17.549	17.5106	17.4731	17.4367	17.4014	17.3672	17.3341	17.3021	17.2619	17.2235
		-22.1855	0.421769		-11.4771	0.461376					5.42561	5.44007	5.45445	5.46873	5.48272	5.4966	5.51034	5.52394	5.5374	5.55071	5.56385	5.57682	5.58962	5.60223	5.61465	5.62688	5.6389	5.65071	5.66231	5.67369	5.68485	5.69578	5.70647	5.71693	5.72715	5.73712	5.74684	5.75632	5.76554	5.77451	5.78322	5.79167	5.79986	5.80779	5.81546	5.82286	5.83001	5.83689	5.8435
		-22.3531	0.416478		-11.2381	0.465079					22.8119	22.8762	22.9391	23.0006	23.0607	23.1192	23.176	23.2311	23.2843	23.3355	23.3848	23.4319	23.4767	23.5193	23.5594	23.5971	23.6322	23.6646	23.6865	23.7051	23.7203	23.732	23.7402	23.7446	23.7454	23.7423	23.7353	23.7244	23.7095	23.6904	23.6673	23.64	23.6084	23.5726	23.5326	23.4882	23.4395	23.3865	23.3291
		-22.5029	0.419879		-11.0092	0.457143					29.9324	30.0033	30.0642	30.115	30.1558	30.1867	30.2076	30.2187	30.2201	30.2117	30.1874	30.1534	30.1096	30.0562	29.9934	29.9213	29.8402	29.7501	29.6512	29.5439	29.4282	29.3045	29.1729	29.0336	28.887	28.7332	28.5725	28.4051	28.2314	28.0516	27.8659	27.6747	27.4781	27.2765	27.0701	26.8591	26.644	26.4248	26.2019
		-22.635	0.424792		-10.7921	0.450794					7.58489	7.62224	7.66141	7.70231	7.74488	7.80067	7.85724	7.91457	7.97261	8.0313	8.09061	8.15047	8.21082	8.27161	8.33278	8.39427	8.456	8.5179	8.5799	8.64194	8.70392	8.76577	8.82742	8.88877	8.94975	9.01026	9.07021	9.12953	9.18811	9.24586	9.30269	9.35852	9.41324	9.46675	9.51897	9.56981	9.61915	9.66693	9.71303
		-22.7498	0.429327		-10.5885	0.453968					12.3621	12.2088	12.0579	11.9096	11.7638	11.6205	11.4796	11.3412	11.2052	11.0717	10.9406	10.8119	10.6856	10.5617	10.4403	10.3212	10.2044	10.0901	9.97808	9.86843	9.77492	9.68288	9.59236	9.50338	9.41597	9.33016	9.24597	9.16342	9.08253	9.00331	8.92579	8.84996	8.77585	8.70345	8.63278	8.56382	8.49659	8.43185	8.36886
		-22.848	0.433107		-10.3996	0.45291					14.5768	14.4761	14.3672	14.2614	14.1588	14.0593	13.9629	13.8697	13.7796	13.6927	13.6088	13.5281	13.4505	13.376	13.3045	13.2361	13.1707	13.1082	13.0487	12.9921	12.9385	12.8878	12.8399	12.7948	12.7524	12.7127	12.6757	12.6412	12.6093	12.5799	12.5529	12.5283	12.506	12.4868	12.4698	12.4549	12.4421	12.4312	12.4224
		-22.9302	0.435752		-10.2268	0.443386					26.5236	26.3815	26.2422	26.1059	25.9726	25.8422	25.7149	25.5905	25.469	25.3505	25.2349	25.1221	25.0122	24.905	24.8005	24.6985	24.5991	24.5021	24.4073	24.3148	24.2244	24.1359	24.0493	23.9643	23.881	23.799	23.7183	23.6387	23.5601	23.4823	23.3933	23.3056	23.2188	23.1328	23.0474	22.9624	22.8777	22.7929	22.7079
		-22.9975	0.433484		-10.0712	0.438624					2.91004	2.9089	2.90768	2.9064	2.90504	2.90361	2.9021	2.9005	2.89882	2.89704	2.89518	2.89321	2.89115	2.88898	2.8867	2.88431	2.8818	2.87916	2.87641	2.87352	2.8705	2.86734	2.86404	2.8606	2.857	2.85325	2.84933	2.84526	2.84102	2.8366	2.83201	2.82724	2.82228	2.81714	2.81181	2.80628	2.80055	2.79462	2.78849
		-23.051	0.43424		-9.93403	0.437037					20.2704	20.4412	20.6094	20.7751	20.9381	21.1148	21.2897	21.4625	21.6333	21.8019	21.9684	22.1327	22.2948	22.4547	22.6123	22.7677	22.9209	23.0718	23.2206	23.3672	23.5118	23.6277	23.7399	23.8485	23.9534	24.0546	24.1521	24.2459	24.3362	24.4227	24.5057	24.585	24.6608	24.7331	24.8019	24.8673	24.9292	24.9878	25.0431
		-23.0915	0.433484		-9.81647	0.434921					19.2836	19.3587	19.4281	19.4917	19.5495	19.6016	19.6477	19.6881	19.7226	19.7513	19.7742	19.7913	19.8026	19.8082	19.8081	19.8023	19.7909	19.7738	19.7513	19.7232	19.6898	19.6509	19.6068	19.5574	19.5029	19.4433	19.3787	19.3092	19.2348	19.1557	19.0719	18.9835	18.8906	18.7933	18.6917	18.5859	18.4759	18.3619	18.244
		-23.1198	0.426304		-9.71964	0.433333					8.8651	8.80459	8.74629	8.69016	8.63614	8.58421	8.53429	8.48635	8.44035	8.39622	8.35392	8.31339	8.2746	8.23749	8.202	8.1681	8.13572	8.10483	8.07536	8.04729	8.02055	7.9951	7.97089	7.94789	7.92603	7.90529	7.88561	7.86696	7.84929	7.83257	7.81675	7.8018	7.78767	7.77434	7.76177	7.74992	7.73876	7.72826	7.71839
		-23.1362	0.423658		-9.64448	0.430159					13.7322	13.7276	13.7257	13.7265	13.7301	13.7365	13.7458	13.7581	13.7733	13.7917	13.8131	13.8377	13.8656	13.8966	13.931	13.9686	14.0096	14.054	14.1017	14.1528	14.2072	14.2651	14.3263	14.3909	14.4588	14.53	14.6046	14.6823	14.7634	14.8475	14.9349	15.0252	15.1186	15.2149	15.3141	15.4161	15.5208	15.6217	15.7248
		-23.1408	0.42706		-9.59163	0.434392					10.7971	10.5413	10.2877	10.0365	9.78777	9.54159	9.29807	9.0573	8.81938	8.58438	8.3524	8.12352	7.89781	7.67534	7.4562	7.24043	7.02667	6.81649	6.60996	6.40709	6.20795	6.01256	5.82095	5.63315	5.44919	5.26908	5.09285	4.92049	4.75202	4.58744	4.42674	4.26993	4.117	3.96793	3.8227	3.6813	3.5437	3.40988	3.2798
		-23.1335	0.428571		-9.56135	0.449206					19.0271	19.0173	19.0032	18.9851	18.963	18.9399	18.913	18.8825	18.8483	18.8108	18.7702	18.7264	18.6799	18.6306	18.5789	18.5248	18.4686	18.4104	18.3504	18.2889	18.2259	18.1616	18.0963	18.0301	17.9631	17.8955	17.8275	17.7593	17.691	17.6227	17.5546	17.4868	17.4195	17.3527	17.2797	17.2071	17.1349	17.0633	16.9924
		-23.1139	0.422147		-9.55351	0.455556					12.1381	12.1244	12.1089	12.0914	12.0719	12.0504	12.0317	12.0106	11.987	11.9609	11.9322	11.9011	11.8674	11.8311	11.7922	11.7508	11.7069	11.6603	11.6112	11.5596	11.5055	11.4489	11.3898	11.3283	11.2644	11.1981	11.1295	11.0587	10.9856	10.9103	10.8329	10.7535	10.6721	10.5888	10.5036	10.4166	10.328	10.2377	10.1458
		-23.0813	0.413832		-9.56752	0.457143					5.99681	5.96331	5.93017	5.89741	5.86505	5.8331	5.80157	5.77049	5.74201	5.71413	5.68687	5.66024	5.63427	5.60898	5.58438	5.56048	5.5373	5.51487	5.49318	5.47225	5.45211	5.43275	5.4142	5.39646	5.37956	5.36348	5.34826	5.3339	5.32041	5.30779	5.29606	5.28522	5.27529	5.26627	5.25816	5.25098	5.24473	5.23942	5.23505
		-23.035	0.424414		-9.60232	0.461905					5.66796	5.7053	5.74365	5.783	5.82337	5.86477	5.90721	5.95069	5.99522	6.0408	6.08745	6.13517	6.18396	6.23382	6.28477	6.3368	6.38991	6.44412	6.49941	6.55579	6.61325	6.67181	6.73145	6.79217	6.85397	6.91685	6.9808	7.04582	7.11189	7.17902	7.24719	7.31639	7.38663	7.45788	7.53014	7.60339	7.67763	7.75283	7.82899
		-22.9741	0.436508		-9.65645	0.473545					7.76695	7.87089	7.97644	8.08352	8.1921	8.30212	8.41352	8.52624	8.64021	8.75536	8.87164	8.98897	9.10726	9.22645	9.34646	9.46721	9.58861	9.71057	9.83302	9.95586	10.079	10.2024	10.3258	10.4494	10.5728	10.6961	10.8192	10.9419	11.0641	11.1859	11.307	11.4274	11.547	11.6657	11.7834	11.9001	12.0156	12.1298	12.2427
		-22.8978	0.43613		-9.72817	0.485185					7.01113	6.89016	6.77165	6.65563	6.54213	6.43116	6.32275	6.21692	6.11366	6.01299	5.91492	5.81943	5.72652	5.6362	5.54843	5.46322	5.38054	5.30037	5.22268	5.14745	5.07466	5.00426	4.93623	4.87053	4.80712	4.74597	4.68703	4.63026	4.57209	4.51622	4.46259	4.41115	4.36183	4.31458	4.26933	4.22604	4.18464	4.14507	4.10728
		-22.8051	0.437264		-9.81571	0.473545					0.81796	0.81796	0.81796	0.81796	0.81796	0.81796	0.81796	0.81796	0.81796	0.81796	0.81796	0.81796	0.81796	0.81796	0.81796	0.81796	0.81796	0.81796	0.81796	0.81796	0.81796	0.81796	0.81796	0.81796	0.81796	0.81796	0.81796	0.81796	0.81796	0.81796	0.81796	0.81796	0.81796	0.81796	0.81796	0.81796	0.81796	0.81796	0.81796
		-22.695	0.444444		-9.91738	0.462434					5.82433	5.63829	5.45622	5.27817	5.10419	4.93432	4.76858	4.60699	4.44957	4.29632	4.14724	4.00232	3.86156	3.72493	3.5924	3.46395	3.33955	3.21082	3.08655	2.96668	2.85111	2.73977	2.63258	2.52944	2.43026	2.33496	2.24345	2.15563	2.0714	1.99067	1.91335	1.83934	1.76855	1.70087	1.63622	1.5745	1.51561	1.45946	1.40028
		-22.5669	0.444067		-10.0315	0.456085					3.9124	3.991	4.07225	4.15618	4.24283	4.33219	4.42428	4.5191	4.61666	4.71695	4.81997	4.92569	5.0341	5.14516	5.25885	5.37513	5.49395	5.61525	5.73898	5.86507	5.99344	6.12402	6.25672	6.39144	6.52808	6.66653	6.80668	6.94839	7.09155	7.23601	7.38162	7.52825	7.67572	7.82387	7.97255	8.12156	8.27073	8.41987	8.56879
		-22.42	0.442933		-10.1565	0.460847					7.51605	7.40996	7.3027	7.19433	7.08491	6.97448	6.86313	6.7509	6.63786	6.52408	6.40962	6.29455	6.17894	6.06286	5.94637	5.82957	5.7125	5.59525	5.4779	5.3605	5.24314	5.12589	5.00883	4.89202	4.77554	4.65946	4.54385	4.42878	4.31432	4.20053	4.08749	3.97526	3.86391	3.75349	3.64407	3.5357	3.42844	3.32235	3.21748
		-22.254	0.444067		-10.2908	0.459788					27.9552	28.1068	28.2532	28.3941	28.5294	28.6591	28.7828	28.9007	29.0124	29.1181	29.2174	29.3105	29.3972	29.4774	29.5511	29.6184	29.6791	29.7333	29.7809	29.822	29.8565	29.8846	29.9063	29.9204	29.9281	29.9295	29.9246	29.9135	29.8964	29.8732	29.8442	29.8095	29.769	29.7231	29.6718	29.6153	29.5536	29.4871	29.4157
		-22.069	0.4452		-10.4331	0.466138					6.34142	6.28861	6.23979	6.19484	6.15364	6.11606	6.08198	6.0513	6.02391	5.9997	5.97858	5.96044	5.9452	5.93278	5.95277	5.9736	5.99526	6.01779	6.0412	6.06551	6.09075	6.11692	6.14405	6.17216	6.20126	6.23427	6.26848	6.30393	6.34064	6.37863	6.41791	6.45853	6.50049	6.54381	6.58853	6.63464	6.68219	6.73117	6.78161
		-21.8656	0.44898		-10.5824	0.46455					9.33666	9.23591	9.1344	9.03213	8.92909	8.8253	8.72075	8.61546	8.50942	8.40266	8.29519	8.18702	8.07817	7.96866	7.85852	7.74778	7.63645	7.52457	7.41218	7.2993	7.18598	7.07225	6.95815	6.84372	6.72902	6.61408	6.49895	6.38368	6.26832	6.15293	6.03755	5.92223	5.80704	5.69203	5.57725	5.46276	5.34861	5.23487	5.12159
		-21.6447	0.448602		-10.738	0.453968					11.1339	11.2073	11.2819	11.3575	11.4341	11.5116	11.59	11.6692	11.7491	11.8296	11.9106	11.992	12.0738	12.1558	12.2379	12.3201	12.4021	12.484	12.5655	12.6466	12.7272	12.8071	12.8862	12.9644	13.0415	13.1175	13.1922	13.2654	13.3372	13.4073	13.4756	13.5419	13.6063	13.6685	13.7285	13.786	13.8411	13.8936	13.9434
		-21.4079	0.445956		-10.8994	0.450265					9.58449	9.50058	9.41569	9.3298	9.24291	9.15501	9.06609	8.97615	8.88519	8.79321	8.70021	8.60619	8.51116	8.41513	8.3181	8.2201	8.12114	8.02122	7.92038	7.81863	7.71599	7.6125	7.50817	7.40304	7.29715	7.19052	7.08318	6.97519	6.86658	6.75739	6.64767	6.53746	6.4268	6.31576	6.20437	6.09269	5.98078	5.86868	5.75645
		-21.157	0.449735		-11.0661	0.450794					12.9981	12.9705	12.942	12.9128	12.8826	12.8516	12.8196	12.7868	12.7531	12.7184	12.6828	12.6463	12.6088	12.5703	12.5309	12.4904	12.4491	12.4067	12.3633	12.319	12.2737	12.2274	12.18	12.1318	12.0825	12.0323	11.9811	11.9289	11.8758	11.8217	11.7668	11.7109	11.6541	11.5964	11.5379	11.4785	11.4183	11.3573	11.2955
		-20.894	0.453515		-11.238	0.448148					23.0821	23.0417	23.0036	22.9678	22.9342	22.9028	22.8736	22.8465	22.8161	22.7881	22.7625	22.739	22.7178	22.6986	22.6814	22.666	22.6524	22.6404	22.6299	22.6207	22.6128	22.606	22.5793	22.5546	22.5318	22.5106	22.4909	22.4722	22.4546	22.4376	22.4211	22.4048	22.3886	22.3722	22.3553	22.3377	22.3389	22.3378	22.3342
		-20.6217	0.454649		-11.4148	0.444974					16.1191	16.1024	16.0837	16.0631	16.0406	16.0163	15.9902	15.9625	15.933	15.9019	15.8692	15.835	15.7993	15.7568	15.7126	15.6668	15.6193	15.5702	15.5196	15.4674	15.4138	15.3588	15.3024	15.2446	15.1854	15.125	15.0634	15.0005	14.9364	14.8712	14.8049	14.7375	14.669	14.5994	14.5289	14.4536	14.3775	14.3007	14.2232
		-20.343	0.454271		-11.5964	0.455556					14.6031	14.5856	14.5663	14.5452	14.5223	14.4975	14.471	14.4427	14.4126	14.3807	14.3471	14.3117	14.2746	14.2358	14.1953	14.1531	14.1092	14.0638	14.0167	13.9681	13.918	13.8664	13.8133	13.7589	13.703	13.6458	13.5874	13.5277	13.4668	13.4048	13.3417	13.2776	13.2125	13.1465	13.0796	13.0119	12.9434	12.8743	12.8067
		-20.0611	0.453515		-11.7825	0.460847					11.2298	11.1308	11.0335	10.938	10.8444	10.7527	10.6629	10.5751	10.4892	10.4054	10.3235	10.2437	10.1659	10.0901	10.0164	9.94481	9.87523	9.80769	9.74219	9.67873	9.6173	9.55787	9.50044	9.44499	9.3915	9.33994	9.2903	9.24255	9.19666	9.15262	9.11038	9.06992	9.02787	8.98774	8.9495	8.91309	8.87847	8.8456	8.81444
		-19.7791	0.455782		-11.9731	0.459259					4.55636	4.62726	4.70015	4.77502	4.85187	4.93068	5.01144	5.09412	5.1787	5.26516	5.35345	5.44353	5.53538	5.62892	5.72412	5.82091	5.91923	6.01902	6.12019	6.22267	6.32638	6.43122	6.53711	6.64393	6.75161	6.86002	6.96905	7.07858	7.1885	7.29868	7.40898	7.51929	7.62945	7.73934	7.8488	7.95771	8.06589	8.17322	8.27953
		-19.5003	0.459562		-12.1685	0.445503					9.2918	9.17698	9.06628	8.95961	8.85691	8.75807	8.66302	8.57166	8.48391	8.39968	8.31888	8.24142	8.16719	8.09613	8.02812	7.96309	7.90093	7.84157	7.7849	7.73085	7.67652	7.62445	7.57456	7.52674	7.4809	7.43696	7.39481	7.35437	7.31556	7.27828	7.24245	7.20798	7.17479	7.14281	7.11194	7.08212	7.05327	7.02531	6.99816
		-19.2272	0.464097		-12.3691	0.43545					12.6617	12.6646	12.6647	12.6621	12.6567	12.6486	12.6377	12.624	12.6076	12.5884	12.5665	12.5418	12.5144	12.4842	12.4514	12.4158	12.3775	12.3365	12.2928	12.2465	12.1975	12.1459	12.0917	12.0348	11.9754	11.9133	11.8488	11.7817	11.7121	11.64	11.5654	11.4885	11.4091	11.3273	11.2432	11.1568	11.0681	10.9772	10.884
		-18.9621	0.464475		-12.5754	0.435979
		-18.7071	0.457294		-12.7877	0.449206
		-18.4634	0.457672		-13.0064	0.45291
		-18.2324	0.458428		-13.2312	0.447619
		-18.0147	0.464097		-13.4618	0.444444
		-17.8107	0.461451		-13.6972	0.453439
		-17.6207	0.453893		-13.9364	0.453439
		-17.4444	0.451625		-14.1777	0.453439
		-17.2815	0.455782		-14.4194	0.450794
		-17.1312	0.456916		-14.6595	0.452381
		-16.9931	0.4452		-14.8962	0.45291
		-16.8666	0.445578		-15.1277	0.451852
		-16.7515	0.447846		-15.3522	0.451852
		-16.6473	0.443311		-15.5684	0.45291
		-16.5537	0.439909		-15.7749	0.44709
		-16.4704	0.444444		-15.9704	0.447619
		-16.3971	0.453137		-16.1541	0.444444
		-16.3334	0.457294		-16.3249	0.44127
		-16.2791	0.457672		-16.4822	0.439683
		-16.2343	0.455026		-16.6254	0.444974
		-16.199	0.454649		-16.7543	0.443915
		-16.1735	0.454271		-16.8692	0.448677
		-16.1583	0.450491		-16.9703	0.460317
		-16.1536	0.456538		-17.0583	0.471429
		-16.1599	0.456916		-17.1342	0.467725
		-16.1776	0.460317		-17.1988	0.452381
		-16.2069	0.460317		-17.2533	0.441799
		-16.2482	0.457294		-17.2985	0.438624
		-16.3016	0.453515		-17.3353	0.445503
		-16.3674	0.454649		-17.3642	0.459259
		-16.4457	0.452003		-17.3857	0.456614
		-16.537	0.446334		-17.4	0.456614
		-16.6415	0.4452		-17.4069	0.449735
		-16.7598	0.444822		-17.4062	0.457672
		-16.8926	0.443689		-17.3973	0.46455
		-17.0405	0.4452		-17.3796	0.47037
		-17.2039	0.450113		-17.3522	0.474603
		-17.3832	0.45805		-17.3144	0.467196
		-17.5785	0.457294		-17.2657	0.466138
		-17.7894	0.44898		-17.2057	0.468254
		-18.0146	0.444822		-17.1342	0.464021
		-18.2527	0.439909		-17.0511	0.46455
		-18.5016	0.442177		-16.9559	0.459788
		-18.7589	0.448224		-16.8485	0.461905
		-19.0223	0.441421		-16.7286	0.459788
		-19.2894	0.428949		-16.5962	0.460317
		-19.5581	0.428194		-16.4517	0.461376
		-19.8263	0.439153		-16.2959	0.455556
		-20.0924	0.439531		-16.13	0.451323
		-20.3545	0.434996		-15.9555	0.45291
		-20.611	0.438775		-15.7742	0.457672
		-20.8604	0.436886		-15.5881	0.460317
		-21.101	0.435374		-15.399	0.457672
		-21.3315	0.435752		-15.2082	0.466667
		-21.5506	0.440665		-15.017	0.482011
		-21.7571	0.44709		-14.8266	0.486772
		-21.95	0.450491		-14.6381	0.480423
		-22.1283	0.450491		-14.4525	0.468783
		-22.291	0.447468		-14.2708	0.45873
		-22.4376	0.449358		-14.0943	0.465608
		-22.5674	0.446712		-13.9239	0.465608
		-22.6801	0.43802		-13.7613	0.468254
		-22.7756	0.426304		-13.608	0.459788
		-22.854	0.424792		-13.4656	0.467196
		-22.9156	0.425548		-13.3358	0.468254
		-22.9607	0.426304		-13.2199	0.460317
		-22.9896	0.426682		-13.1191	0.457672
		-23.0028	0.431973		-13.0341	0.453439
		-23.0006	0.43613		-12.9657	0.446032
		-22.9836	0.435752		-12.9143	0.439683
		-22.952	0.427816		-12.88	0.431746
		-22.9065	0.419123		-12.8629	0.434921
		-22.8474	0.427438		-12.8631	0.43545
		-22.7753	0.436886		-12.8806	0.438624
		-22.6902	0.441421		-12.9153	0.439683
		-22.5922	0.443311		-12.9671	0.44709
		-22.4808	0.439909		-13.0359	0.458201
		-22.3555	0.435752		-13.1211	0.458201
		-22.2155	0.430461		-13.222	0.46455
		-22.0598	0.424792		-13.3378	0.46455
		-21.8875	0.417611		-13.4674	0.46455
		-21.6979	0.411565		-13.6099	0.455026
		-21.4909	0.411187		-13.7642	0.44709
		-21.2671	0.413832		-13.9289	0.448677
		-21.0275	0.421013		-14.1028	0.450794
		-20.7736	0.424036		-14.285	0.454497
		-20.5074	0.419879		-14.4743	0.457672
		-20.2312	0.421769		-14.6703	0.452381
		-19.9478	0.413454		-14.8723	0.456614
		-19.6598	0.413832		-15.0801	0.456085
		-19.3702	0.421769		-15.2936	0.459788
		-19.0816	0.427816		-15.513	0.450794
		-18.7965	0.431973		-15.7382	0.440212
		-18.5172	0.430461		-15.9691	0.44127
		-18.246	0.438775		-16.205	0.438624
		-17.9848	0.439531		-16.4447	0.437037
		-17.736	0.435374		-16.6869	0.440741
		-17.5015	0.43424		-16.9301	0.451852
		-17.2834	0.43424		-17.173	0.464021
		-17.0832	0.434996		-17.4141	0.462963
		-16.9023	0.430839		-17.6519	0.466138
		-16.7416	0.430461		-17.8848	0.481482
		-16.6014	0.43424		-18.1107	0.492593
		-16.4817	0.434996		-18.3279	0.493122
		-16.3825	0.43613		-18.5344	0.485185
		-16.303	0.435752		-18.7287	0.483069
		-16.2428	0.435374		-18.9096	0.492063
		-16.201	0.436886		-19.076	0.498413
		-16.1764	0.445578		-19.227	0.491005
		-16.1681	0.456538		-19.3621	0.484127
		-16.1747	0.45616		-19.4808	0.485714
		-16.1953	0.457294		-19.5829	0.497884
		-16.2288	0.455782		-19.6683	0.493122
		-16.2743	0.455404		-19.7371	0.497354
		-16.3311	0.453137		-19.7894	0.492063
		-16.3984	0.446334		-19.8256	0.48254
		-16.4755	0.444067		-19.846	0.480952
		-16.5619	0.44898		-19.8511	0.47672
		-16.6571	0.454271		-19.8412	0.484127
		-16.761	0.450113		-19.8169	0.48836
		-16.8734	0.446712		-19.7787	0.484656
		-16.9947	0.452381		-19.7273	0.474603
		-17.1254	0.454271		-19.6639	0.461376
		-17.2661	0.44898		-19.5896	0.460317
		-17.4177	0.4452		-19.5061	0.469841
		-17.5808	0.446712		-19.4149	0.480952
		-17.7561	0.452003		-19.3173	0.485714
		-17.9441	0.459562		-19.2145	0.48254
		-18.1449	0.458806		-19.1075	0.475132
		-18.3586	0.462963		-18.9968	0.473545
		-18.5848	0.473167		-18.883	0.475661
		-18.8225	0.474301		-18.7664	0.471958
		-19.0704	0.467498		-18.6469	0.469841
		-19.3267	0.461451		-18.5245	0.466138
		-19.589	0.460695		-18.3989	0.456085
		-19.8549	0.464475		-18.2701	0.45291
		-20.1215	0.459184		-18.1385	0.450265
		-20.3861	0.450491		-18.0045	0.444444
		-20.6461	0.442555		-17.8692	0.440741
		-20.899	0.438398		-17.7337	0.434921
		-21.1425	0.430461		-17.5996	0.445503
		-21.3747	0.437642		-17.4686	0.452381
		-21.5939	0.443689		-17.3423	0.456614
		-21.7989	0.445956		-17.2223	0.464021
		-21.9886	0.4452		-17.1102	0.464021
		-22.1625	0.443689		-17.0073	0.462434
		-22.3204	0.447468		-16.9149	0.453439
		-22.4625	0.442555		-16.8342	0.450794
		-22.5891	0.436886		-16.7663	0.452381
		-22.7006	0.435752		-16.7122	0.44709
		-22.7974	0.443689		-16.6728	0.442857
		-22.8798	0.448602		-16.6488	0.444974
		-22.9478	0.444822		-16.6403	0.438624
		-23.0015	0.436508		-16.6475	0.444974
		-23.0408	0.437642		-16.6701	0.44709
		-23.0656	0.439153		-16.7077	0.450265
		-23.076	0.438775		-16.7594	0.449206
		-23.0724	0.435374		-16.8245	0.450265
		-23.0555	0.43424		-16.9018	0.450265
		-23.0259	0.442933		-16.9904	0.446561
		-22.985	0.444822		-17.0889	0.451323
		-22.9337	0.441043		-17.1964	0.450265
		-22.8733	0.438398		-17.312	0.452381
		-22.8051	0.436886		-17.4348	0.448148
		-22.7301	0.438398		-17.564	0.454497
		-22.6492	0.44709		-17.6989	0.443915
		-22.563	0.450491		-17.8386	0.445503
		-22.4719	0.442177		-17.9824	0.450265
		-22.3761	0.440287		-18.1295	0.460317
		-22.2755	0.444444		-18.2793	0.468783
		-22.17	0.43802		-18.431	0.466667
		-22.0596	0.438398		-18.5839	0.455556
		-21.9442	0.445956		-18.7374	0.446561
		-21.8233	0.449358		-18.8909	0.459259
		-21.6965	0.453515		-19.0439	0.463492
		-21.563	0.455782		-19.1962	0.461376
		-21.4223	0.45805		-19.3473	0.453439
		-21.2741	0.460695		-19.497	0.459259
		-21.1183	0.460695		-19.645	0.459788
		-20.9554	0.458428		-19.7908	0.451323
		-20.7863	0.467498		-19.9343	0.446032
		-20.6119	0.471277		-20.0753	0.445503
		-20.4338	0.46901		-20.214	0.448148
		-20.2534	0.467498		-20.3508	0.446561
		-20.0727	0.468632		-20.4857	0.453968
		-19.8935	0.468632		-20.6187	0.461905
		-19.7182	0.470522		-20.7496	0.460847
		-19.5485	0.465986		-20.878	0.455556
		-19.3865	0.460695		-21.0036	0.455026
		-19.2337	0.463719		-21.1259	0.459259
		-19.0915	0.45805		-21.2446	0.468254
		-18.9605	0.453515		-21.3593	0.468783
		-18.8414	0.451625		-21.4696	0.464021
		-18.7342	0.451625		-21.5749	0.462963
		-18.6391	0.453515		-21.6746	0.456614
		-18.5558	0.449358		-21.7682	0.450794
		-18.4843	0.447846		-21.8549	0.451852
		-18.4242	0.454649		-21.9341	0.456614
		-18.3752	0.456538		-22.0054	0.448148
		-18.3367	0.454649		-22.0681	0.443386
		-18.3076	0.454271		-22.1216	0.437566
		-18.287	0.460317		-22.1653	0.44127
		-18.2734	0.457294		-22.1984	0.451852
		-18.2653	0.450113		-22.2198	0.459788
		-18.2612	0.448602		-22.2287	0.460847
		-18.2599	0.442933		-22.2243	0.455556
		-18.2602	0.441421		-22.2064	0.452381
		-18.2615	0.442555		-22.1752	0.451323
		-18.2635	0.451625		-22.1317	0.446032
		-18.2661	0.447468		-22.0771	0.453968
		-18.2694	0.446334		-22.0132	0.456085
		-18.2735	0.447846		-21.9423	0.450794
		-18.2784	0.4452		-21.8667	0.450265
		-18.2843	0.446334		-21.7889	0.448148
		-18.2913	0.454649		-21.7109	0.444974
		-18.2994	0.459562		-21.6345	0.445503
		-18.3086	0.464475		-21.5612	0.445503
		-18.319	0.465231		-21.4923	0.444974
		-18.3307	0.466742		-21.4284	0.443915
		-18.344	0.461451		-21.3699	0.439153
		-18.3594	0.461073		-21.3169	0.449206
		-18.3776	0.451625		-21.2688	0.457672
		-18.3994	0.445956		-21.2249	0.460847
		-18.4256	0.441043		-21.1845	0.453968
		-18.457	0.438775		-21.1466	0.450265
		-18.4942	0.437642		-21.1101	0.450794
		-18.5373	0.436886		-21.0738	0.449206
		-18.5862	0.437264		-21.0368	0.455556
		-18.6403	0.437264		-20.998	0.456614
		-18.6987	0.436886		-20.957	0.458201
		-18.7602	0.439153		-20.9137	0.462434
		-18.8236	0.439531		-20.8684	0.455556
		-18.8882	0.437642		-20.8218	0.449206
		-18.9535	0.440665		-20.7745	0.439683
		-19.0192	0.4452		-20.7274	0.438624
		-19.085	0.439909		-20.6814	0.446032
		-19.7758	0.431595		-20.6374	0.450794
		-19.7702	0.433484		-20.5965	0.444444
		-19.7645	0.435752		-20.5596	0.440741
		-19.7587	0.442177		-20.5275	0.438095
		-19.7529	0.441799		-20.5006	0.436508
		-19.7471	0.446334		-20.4791	0.426984
		-19.7412	0.451247		-20.4629	0.419577
		-19.7352	0.44709		-20.4516	0.422751
		-19.7292	0.443689		-20.4448	0.431746
		-19.7232	0.443311		-20.4418	0.434392
		-19.7171	0.437264		-20.4418	0.424339
		-19.7109	0.429327		-20.4437	0.421164
		-19.7047	0.427816		-20.4466	0.426984
		-19.6984	0.436508		-20.4493	0.438624
		-19.692	0.442933		-20.451	0.431217
		-19.6856	0.445956		-20.4505	0.428042
		-19.6791	0.445956		-20.4469	0.437037
		-19.6726	0.444822		-20.439	0.437566
		-19.666	0.441799		-20.426	0.451323
		-19.6594	0.439153		-20.407	0.455026
		-19.6526	0.442177		-20.3818	0.45873
		-19.6459	0.4452		-20.3504	0.457143
		-19.639	0.450869		-20.3131	0.453968
		-19.6321	0.454271		-20.2708	0.451852
		-19.6251	0.455026		-19.9455	0.45873
		-19.6181	0.45805		-19.9472	0.468783
		-19.611	0.452381		-19.9486	0.465079
		-19.6038	0.44898		-19.9499	0.454497
		-19.5965	0.44709		-19.9509	0.444444
		-19.5892	0.450491		-19.9518	0.444974
		-19.5818	0.452003		-19.9525	0.458201
		-19.5744	0.456538		-19.953	0.453439
		-19.5668	0.450113		-19.9533	0.453439
		-19.5592	0.44709		-19.9534	0.462963
		-19.5516	0.447846		-19.9533	0.467725
		-19.5438	0.454649		-19.953	0.474074
		-19.536	0.459184		-19.9526	0.473016
		-19.5281	0.463341		-19.952	0.464021
		-19.5201	0.45805		-19.9512	0.457672
		-19.5121	0.453893		-19.9502	0.45873
		-19.504	0.455782		-19.949	0.45873
		-19.4958	0.446334		-19.9476	0.463492
		-19.4875	0.448224		-19.9461	0.461376
		-19.4792	0.447846		-19.9444	0.462434
		-19.4708	0.452003		-19.9425	0.466138
		-19.4623	0.450869		-19.9405	0.471958
		-19.4537	0.447468		-19.9383	0.471429
		-19.445	0.446712		-19.9359	0.470899
		-19.4363	0.446334		-19.9333	0.468254
		-19.4275	0.447846		-19.9306	0.457672
		-19.4186	0.442933		-19.9277	0.455026
		-19.4097	0.438398		-19.9246	0.460847
		-19.4006	0.439531		-19.9214	0.451852
		-19.3915	0.444822		-19.918	0.449206
		-19.3823	0.448224		-19.9144	0.455556
		-19.373	0.44898		-19.9107	0.460847
		-19.3637	0.4452		-19.9068	0.460847
		-19.3543	0.449358		-19.9027	0.455556
		-19.3448	0.453515		-19.8985	0.457143
		-19.3352	0.445578		-19.8941	0.454497
		-19.3255	0.446712		-19.8896	0.450794
		-19.3158	0.44709		-19.8849	0.45291
		-19.306	0.442933		-19.8801	0.451323
		-19.2961	0.443689		-19.8751	0.453439
		-19.2862	0.447468		-19.8699	0.457672
		-19.2761	0.452381		-19.8646	0.458201
		-19.266	0.4452		-19.8592	0.451323
		-19.2559	0.446334		-19.8536	0.449206
		-19.2456	0.452759		-19.8479	0.445503
		-19.2353	0.447468		-19.842	0.449206
		-19.2249	0.439909		-19.8359	0.45291
		-19.2144	0.442933		-19.8297	0.451323
		-19.2039	0.44709		-19.8234	0.451323
		-19.1933	0.442933		-19.8169	0.454497
		-19.1826	0.4452		-19.8103	0.453968
		-19.1718	0.457294		-19.8035	0.456614
		-19.161	0.458428		-19.7966	0.455556
		-19.1501	0.458428		-19.7896	0.452381
		-19.1392	0.45616		-19.7824	0.452381
		-19.1281	0.463719		-19.7751	0.454497
		-19.117	0.46901		-19.7676	0.459259
		-19.1059	0.468632		-19.76	0.458201
		-19.0947	0.464097		-19.7523	0.463492
		-19.0834	0.452003		-19.7444	0.457143
		-19.0721	0.443311		-19.7365	0.444444
		-19.0607	0.450491		-19.7283	0.442328
		-19.0492	0.457294		-19.7201	0.44709
		-19.0377	0.456916		-19.7117	0.446032
		-19.0261	0.451625		-19.7032	0.45291
		-19.0145	0.444444		-19.6946	0.457143
		-19.0028	0.444822		-19.6858	0.448148
		-18.9911	0.442933		-19.6769	0.441799
		-18.9793	0.445578		-19.6679	0.443386
		-18.9675	0.453137		-19.6588	0.456085
		-18.9556	0.455404		-19.6495	0.452381
		-18.9436	0.453893		-19.6401	0.44709
		-18.9317	0.457294		-19.6306	0.442328
		-18.9196	0.461451		-19.621	0.445503
		-18.9076	0.464475		-19.6113	0.453439
		-18.8954	0.464475		-19.6014	0.453968
		-18.8833	0.464853		-19.5915	0.450794
		-18.8711	0.455782		-19.5814	0.451852
		-18.8588	0.460695		-19.5712	0.451852
		-18.8466	0.462585		-19.5609	0.451323
		-18.8342	0.461073		-19.5505	0.439153
		-18.8219	0.460695		-19.54	0.437037
		-18.8095	0.461829		-19.5294	0.438095
		-18.7971	0.461073		-19.5186	0.44127
		-18.7846	0.462207		-19.5078	0.435979
		-18.7722	0.465986		-19.4968	0.433862
		-18.7597	0.470144		-19.4858	0.433333
		-18.7471	0.471277		-19.4747	0.428571
		-18.7346	0.468632		-19.4634	0.419577
		-18.722	0.467498		-19.452	0.409524
		-18.7094	0.465231		-19.4406	0.414286
		-18.6968	0.460317		-19.4291	0.425926
		-18.6841	0.45994		-19.4174	0.434392
		-18.6714	0.456538		-19.4057	0.430688
		-18.6588	0.454649		-19.3938	0.421693
		-18.6461	0.459562		-19.3819	0.429101
		-18.6334	0.458428		-19.3699	0.424868
		-18.6206	0.456538		-19.3578	0.422222
		-18.6079	0.454649		-19.3456	0.416931
		-18.5952	0.452381		-19.3333	0.426455
		-18.5824	0.456916		-19.321	0.43545
		-18.5697	0.455026		-19.3085	0.431217
		-18.5569	0.449735		-19.296	0.424868
		-18.5441	0.445578		-19.2834	0.428571
		-18.5314	0.444822		-19.2707	0.426455
		-18.5186	0.447846		-19.2579	0.438095
		-18.5059	0.44898		-19.245	0.441799
		-18.4931	0.44898		-19.2321	0.433862
		-18.4803	0.44709		-19.2191	0.431746
		-18.4676	0.446334		-19.206	0.43545
		-18.4548	0.441421		-19.1929	0.444444
		-18.4421	0.438398		-19.1796	0.451852
		-18.4294	0.438775		-19.1663	0.440212
		-18.4167	0.445956		-19.1529	0.442328
		-18.404	0.449735		-19.1395	0.460317
		-18.3913	0.449735		-19.126	0.468783
		-18.3786	0.449735		-19.1124	0.471429
		-18.366	0.450491		-19.0988	0.472487
		-18.3533	0.450113		-19.0851	0.478836
		-18.3407	0.44709		-19.0713	0.478307
		-18.3281	0.440287		-19.0575	0.475661
		-18.3155	0.436508		-19.0436	0.473545
		-18.303	0.439909		-19.0296	0.466667
		-18.2904	0.438398		-19.0156	0.462434
		-18.2779	0.440287		-19.0015	0.459788
		-18.2655	0.440287		-18.9874	0.46455
		-18.253	0.444067		-18.9732	0.459259
		-18.2406	0.448602		-18.959	0.451323
		-18.2282	0.444067		-18.9447	0.442857
		-18.2159	0.43802		-18.9304	0.447619
		-18.2036	0.436508		-18.916	0.451852
		-18.1913	0.43802		-18.9015	0.448148
		-18.179	0.438398		-18.887	0.448677
		-18.1668	0.439909		-18.8725	0.455026
		-18.1546	0.444444		-18.8579	0.447619
		-18.1425	0.442177		-18.8433	0.448148
		-18.1304	0.434996		-18.8286	0.449735
		-18.1184	0.432351		-18.8139	0.455026
		-18.1063	0.432351		-18.7991	0.460847
		-18.0944	0.434996		-18.7843	0.470899
		-18.0824	0.442177		-18.7695	0.461376
		-18.0706	0.441799		-18.7546	0.460847
		-18.0587	0.442933		-18.7397	0.461376
		-18.0469	0.438775		-18.7248	0.455026
		-18.0352	0.43613		-18.7098	0.449735
		-18.0235	0.442177		-18.6948	0.450265
		-18.0118	0.449358		-18.6797	0.453968
		-18.0002	0.455404		-18.6647	0.45873
		-17.9887	0.455404		-18.6496	0.467196
		-17.9772	0.452003		-18.6344	0.458201
		-17.9657	0.447846		-18.6193	0.464021
		-17.9543	0.445578		-18.6041	0.469841
		-17.9429	0.445578		-18.5889	0.474074
		-17.9316	0.44898		-18.5736	0.47619
		-17.9204	0.443689		-18.5584	0.475132
		-17.9092	0.439531		-18.5431	0.471958
		-17.8981	0.437642		-18.5278	0.461905
		-17.887	0.43424		-18.5124	0.460847
		-17.8759	0.441799		-18.4971	0.448677
		-17.8649	0.450869		-18.4817	0.444974
		-17.854	0.452003		-18.4663	0.455556
		-17.8431	0.447846		-18.4509	0.463492
		-17.8323	0.448224		-18.4355	0.467725
		-17.8216	0.446334		-18.4201	0.461905
		-17.8109	0.442555		-18.4046	0.462434
		-17.8002	0.441043		-18.3892	0.466667
		-17.7896	0.44709		-18.3737	0.469841
		-17.7791	0.458806		-18.3582	0.466667
		-17.7686	0.462207		-18.3427	0.468254
		-17.7582	0.457672		-18.3272	0.475132
		-17.7478	0.453137		-18.3117	0.475132
		-17.7375	0.447468		-18.2962	0.475661
		-17.7273	0.444822		-18.2806	0.469312
		-17.7171	0.445956		-18.2651	0.467725
		-17.7069	0.450113		-18.2495	0.471958
		-17.6968	0.449358		-18.234	0.465079
		-17.6868	0.449735		-18.2184	0.457672
		-17.6768	0.445578		-18.2028	0.450265
		-17.6669	0.447468		-18.1873	0.443915
		-17.6571	0.445956		-18.1717	0.451852
		-17.6473	0.441043		-18.1561	0.46455
		-17.6375	0.430839		-18.1405	0.468254
		-17.6278	0.431217		-18.1249	0.475661
		-17.6182	0.431217		-18.1093	0.478836
		-17.6086	0.433484		-18.0937	0.472487
		-17.5991	0.437264		-18.0781	0.460317
		-17.5896	0.442555		-18.0625	0.461376
		-17.5802	0.443689		-18.0468	0.465608
		-17.5708	0.446334		-18.0312	0.466667
		-17.5615	0.4452		-18.0156	0.461376
		-17.5522	0.448602		-18	0.460317
		-17.543	0.445956		-17.9843	0.468254
		-17.5339	0.444822		-17.9687	0.47672
		-17.5248	0.446712		-17.9531	0.489418
		-17.5157	0.448224		-17.9374	0.483598
		-17.5067	0.453137		-17.9218	0.479365
		-17.4977	0.451247		-17.9062	0.478836
		-17.4888	0.451625		-17.8905	0.487302
		-17.4799	0.44898		-17.8749	0.496296
		-17.4711	0.447468		-17.8592	0.493122
		-17.4623	0.444067		-17.8436	0.480952
		-17.4536	0.440287		-17.8279	0.468783
		-17.4449	0.443689		-17.8123	0.47672
		-17.4362	0.440665		-17.7966	0.483069
		-17.4276	0.434618		-17.7809	0.480423
		-17.419	0.431973		-17.7653	0.477778
		-17.4105	0.43424		-17.7496	0.475661
		-17.402	0.439531		-17.7339	0.47037
		-17.3936	0.440665		-17.7183	0.475661
		-17.3852	0.432729		-17.7026	0.474074
		-17.3768	0.433484		-17.6869	0.465079
		-17.3684	0.43424		-17.6712	0.456614
		-17.3601	0.432351		-17.6555	0.446032
		-17.3519	0.427816		-17.6398	0.44709
		-17.3436	0.424792		-17.6241	0.449206
		-17.3354	0.421391		-17.6084	0.444974
		-17.3273	0.429327		-17.5926	0.44709
		-17.3191	0.431973		-17.5769	0.446561
		-17.311	0.434996		-17.5612	0.453968
		-17.303	0.438398		-17.5454	0.457143
		-17.2949	0.435752		-17.5297	0.460317
		-17.2869	0.428949		-17.5139	0.467725
		-17.2789	0.427816		-17.4981	0.475132
		-17.271	0.431595		-17.4824	0.475132
		-17.263	0.431595		-17.4666	0.473545
		-17.2551	0.430083		-17.4508	0.472487
		-17.2472	0.440287		-17.435	0.462963
		-17.2394	0.450491		-17.4191	0.461905
		-17.2315	0.445578		-17.4033	0.459259
		-17.2237	0.437642		-17.3874	0.460847
		-17.2159	0.433484		-17.3716	0.456085
		-17.2081	0.434618		-17.3557	0.450794
		-17.2004	0.440287		-17.3398	0.446561
		-17.1926	0.441043		-17.3239	0.44709
		-17.1849	0.442555		-17.308	0.453968
		-17.1772	0.446334		-17.2921	0.453439
		-17.1695	0.445578		-17.2761	0.448677
		-17.1618	0.444444		-17.2602	0.450265
		-17.1542	0.450869		-17.2442	0.452381
		-17.1465	0.455782		-17.2282	0.456614
		-17.1389	0.45805		-17.2122	0.454497
		-17.1313	0.455404		-17.1962	0.453439
		-17.1237	0.453893		-17.1801	0.461905
		-17.1161	0.449358		-17.1641	0.462434
		-17.1085	0.450113		-17.148	0.459259
		-17.1009	0.451247		-17.1319	0.453968
		-17.0933	0.447468		-17.1159	0.446561
		-17.0857	0.4452		-17.0997	0.446032
		-17.0782	0.442933		-17.0836	0.448677
		-17.0706	0.444067		-17.0675	0.459259
		-17.063	0.439909		-17.0513	0.451323
		-17.0555	0.447468		-17.0351	0.434392
		-17.0479	0.457672		-17.0189	0.438095
		-17.0404	0.465608		-17.0027	0.435979
		-17.0328	0.466364		-16.9865	0.438095
		-17.0253	0.461829		-16.9703	0.437566
		-17.0177	0.454649		-16.954	0.437037
		-17.0102	0.446712		-16.9377	0.437037
		-17.0026	0.444822		-16.9215	0.442857
		-16.9951	0.445956		-16.9052	0.451323
		-16.9875	0.442177		-16.8888	0.454497
		-16.98	0.443311		-16.8725	0.451323
		-16.9724	0.440287		-16.8562	0.455026
		-16.9648	0.444444		-16.8398	0.450794
		-16.9573	0.447468		-16.8235	0.44709
		-16.9497	0.448602		-16.8071	0.439683
		-16.9421	0.453137		-16.7907	0.439153
		-16.9345	0.449735		-16.7743	0.440212
		-16.9269	0.444067		-16.7579	0.435979
		-16.9193	0.443311		-16.7415	0.441799
		-16.9117	0.451247		-16.725	0.451852
		-16.9041	0.450113		-16.7086	0.459788
		-16.8965	0.446712		-16.6921	0.453439
		-16.8888	0.443689		-16.6757	0.460317
		-16.8812	0.4452		-16.6592	0.469312
		-16.8736	0.446712		-16.6427	0.465608
		-16.8659	0.456916		-16.6262	0.464021
		-16.8582	0.462207		-16.6097	0.458201
		-16.8506	0.460317		-16.5932	0.461905
		-16.8429	0.455782		-16.5767	0.468783
		-16.8352	0.453893		-16.5602	0.471429
		-16.8275	0.451625		-16.5437	0.462963
		-16.8198	0.450113		-16.5272	0.463492
		-16.8121	0.453137		-16.5106	0.468254
		-16.8043	0.453515		-16.4941	0.466667
		-16.7966	0.455404		-16.4775	0.459788
		-16.7889	0.453515		-16.461	0.465608
		-16.7811	0.451625		-16.4445	0.468783
		-16.7733	0.452003		-16.4279	0.470899
		-16.7656	0.452759		-16.4114	0.47037
		-16.7578	0.451247		-16.3948	0.473016
		-16.75	0.447468		-16.3782	0.473545
		-16.7422	0.447846		-16.3617	0.465608
		-16.7344	0.44898		-16.3451	0.468783
		-16.7266	0.452759		-16.3286	0.468254
		-16.7187	0.451247		-16.312	0.467725
		-16.7109	0.448602		-16.2955	0.457672
		-16.703	0.439531		-16.2789	0.455026
		-16.6952	0.430839		-16.2624	0.456085
		-16.6873	0.431217		-16.2458	0.461905
		-16.6794	0.426682		-16.2293	0.462434
		-16.6715	0.420257		-16.2127	0.453968
		-16.6636	0.425548		-16.1962	0.45291
		-16.6557	0.432351		-16.1797	0.460317
		-16.6477	0.429327		-16.1632	0.457143
		-16.6398	0.421769		-16.1466	0.457143
		-16.6318	0.422525		-16.1301	0.465079
		-16.6239	0.429327		-16.1136	0.46455
		-16.6159	0.431595		-16.0971	0.452381
		-16.6079	0.430461		-16.0806	0.442857
		-16.5999	0.425548		-16.0641	0.44127
		-16.5919	0.433484		-16.0476	0.441799
		-16.5839	0.440287		-16.0311	0.44709
		-16.5759	0.433484		-16.0147	0.446032
		-16.5678	0.441043		-15.9982	0.444974
		-16.5598	0.445578		-15.9817	0.445503
		-16.5517	0.443311		-15.9653	0.444444
		-16.5436	0.434618		-15.9488	0.449735
		-16.5356	0.431595		-15.9324	0.457143
		-16.5275	0.43424		-15.916	0.469841
		-16.5194	0.435374		-15.8995	0.479365
		-16.5112	0.440665		-15.8831	0.477249
		-16.5031	0.438775		-15.8667	0.474603
		-16.495	0.440287		-15.8503	0.466138
		-16.4868	0.433107		-15.8339	0.46455
		-16.4787	0.424414		-15.8175	0.473545
		-16.4705	0.421391		-15.8012	0.472487
		-16.4623	0.421013		-15.7848	0.45873
		-16.4541	0.426682		-15.7684	0.450265
		-16.4459	0.424036		-15.7521	0.455026
		-16.4377	0.422903		-15.7357	0.456085
		-16.4295	0.42328		-15.7194	0.444974
		-16.4213	0.424036		-15.7031	0.443915
		-16.413	0.426304		-15.6867	0.434921
		-16.4048	0.425548		-15.6704	0.42963
		-16.3965	0.422903		-15.6541	0.429101
		-16.3882	0.422903		-15.6378	0.436508
		-16.38	0.422147		-15.6215	0.452381
		-16.3717	0.418745		-15.6052	0.459788
		-16.3634	0.41232		-15.589	0.463492
		-16.3551	0.416856		-15.5727	0.467196
		-16.3467	0.417234		-15.5564	0.473016
		-16.3384	0.416478		-15.5402	0.479365
		-16.33	0.42328		-15.5239	0.48254
		-16.3217	0.433484		-15.5077	0.485714
		-16.3133	0.439153		-15.4914	0.479894
		-16.3049	0.439909		-15.4752	0.482011
		-16.2966	0.441799		-15.459	0.481482
		-16.2882	0.452759		-15.4427	0.475661
		-16.2798	0.455404		-15.4265	0.477778
		-16.2713	0.453137		-15.4103	0.467725
		-16.2629	0.450869		-15.3941	0.471429
		-16.2545	0.45616		-15.3779	0.484127
		-16.246	0.456916		-15.3617	0.485185
		-16.2376	0.449358		-15.3456	0.48254
		-16.2291	0.444444		-15.3294	0.487302
		-16.2206	0.443689		-15.3132	0.487831
		-16.2121	0.442177		-15.2971	0.486243
		-16.2036	0.448602		-15.2809	0.483069
		-16.1951	0.455404		-15.2648	0.483598
		-16.1866	0.455782		-15.2487	0.484127
		-16.1781	0.44898		-15.2325	0.488889
		-16.1695	0.441043		-15.2164	0.49418
		-16.161	0.441799		-15.2003	0.493122
		-16.1524	0.448602		-15.1842	0.477778
		-16.1439	0.447468		-15.1681	0.47619
		-16.1353	0.444822		-15.152	0.484656
		-16.1268	0.442177		-15.136	0.480952
		-16.1182	0.446334		-15.1199	0.467725
		-16.1096	0.456538		-15.1038	0.465079
		-16.101	0.461829		-15.0878	0.469841
		-16.0924	0.457294		-15.0717	0.468783
		-16.0838	0.451247		-15.0557	0.472487
		-16.0752	0.447468		-15.0397	0.475132
		-16.0666	0.452003		-15.0237	0.478836
		-16.058	0.458428		-15.0077	0.483069
		-16.0494	0.455026		-14.9917	0.482011
		-16.0408	0.44709		-14.9757	0.486243
		-16.0322	0.442177		-14.9597	0.483598
		-16.0236	0.441421		-14.9437	0.475661
		-16.015	0.443689		-14.9277	0.469312
		-16.0063	0.450491		-14.9118	0.471958
		-15.9977	0.454271		-14.8958	0.469312
		-15.9891	0.453137		-14.8799	0.462963
		-15.9805	0.457672		-14.864	0.460317
		-15.9719	0.457672		-14.8481	0.46455
		-15.9633	0.452003		-14.8322	0.460847
		-15.9547	0.453893		-14.8163	0.458201
		-15.9461	0.450869		-14.8004	0.450794
		-15.9376	0.453515		-14.7845	0.450265
		-15.929	0.451247		-14.7687	0.44127
		-15.9204	0.451625		-14.7528	0.443386
		-15.9118	0.449735		-14.737	0.460317
		-15.9033	0.454649		-14.7211	0.456614
		-15.8947	0.449735		-14.7053	0.455556
		-15.8862	0.446712		-14.6895	0.456085
		-15.8777	0.442933		-14.6737	0.460317
		-15.8691	0.438775		-14.6579	0.457143
		-15.8606	0.428571		-14.6422	0.447619
		-15.8521	0.428571		-14.6264	0.443915
		-15.8436	0.438398		-14.6107	0.449206
		-15.8351	0.44709		-14.5949	0.447619
		-15.8266	0.448602		-14.5792	0.435979
		-15.8182	0.451247		-14.5635	0.430688
		-15.8097	0.450869		-14.5478	0.428571
		-15.8013	0.450113		-14.5322	0.42328
		-15.7928	0.452759		-14.5165	0.434392
		-15.7844	0.452759		-14.5009	0.440741
		-15.776	0.453893		-14.4853	0.440212
		-15.7676	0.452759		-14.4697	0.443915
		-15.7592	0.455782		-14.4541	0.445503
		-15.7508	0.456538		-14.4385	0.441799
		-15.7425	0.452003		-14.423	0.445503
		-15.7341	0.451625		-14.4075	0.450265
		-15.7258	0.450491		-14.392	0.451852
		-15.7175	0.449358		-14.3765	0.45873
		-15.7092	0.450869		-14.361	0.466138
		-15.7009	0.44709		-14.3456	0.464021
		-15.6926	0.446712		-14.3302	0.459788
		-15.6843	0.445578		-14.3148	0.459788
		-15.6761	0.452759		-14.2994	0.459788
		-15.6678	0.456916		-14.2841	0.471429
		-15.6596	0.455404		-14.2687	0.47619
		-15.6514	0.460695		-14.2535	0.469841
		-15.6432	0.464097		-14.2382	0.466667
		-15.635	0.462207		-14.223	0.465079
		-15.6268	0.459184		-14.2077	0.462963
		-15.6187	0.462963		-14.1926	0.465079
		-15.6105	0.457294		-14.1774	0.467725
		-15.6024	0.450869		-14.1623	0.461376
		-15.5943	0.462585		-14.1472	0.461905
		-15.5862	0.463719		-14.1321	0.462434
		-15.5781	0.460317		-14.1171	0.461905
		-15.57	0.453893		-14.1021	0.460317
		-15.5619	0.456916		-14.0871	0.451323
		-15.5539	0.460317		-14.0722	0.445503
		-15.5459	0.460695		-14.0573	0.438624
		-15.5378	0.45616		-14.0424	0.440741
		-15.5298	0.44898		-14.0275	0.439153
		-15.5218	0.44709		-14.0127	0.428571
		-15.5138	0.449358		-13.9979	0.428571
		-15.5059	0.453893		-13.9832	0.426455
		-15.4979	0.447468		-13.9685	0.428042
		-15.49	0.444444		-13.9538	0.42963
		-15.482	0.438398		-13.9392	0.426984
		-15.4741	0.428194		-13.9245	0.428571
		-15.4662	0.439153		-13.91	0.432275
		-15.4583	0.444067		-13.8954	0.43545
		-15.4504	0.449358		-13.8809	0.430159
		-15.4425	0.453893		-13.8664	0.429101
		-15.4346	0.462963		-13.852	0.425397
		-15.4268	0.471655		-13.8376	0.431746
		-15.4189	0.467498		-13.8232	0.432804
		-15.4111	0.455026		-13.8089	0.434392
		-15.4033	0.454649		-13.7946	0.441799
		-15.3954	0.453137		-13.7803	0.451323
		-15.3876	0.452381		-13.7661	0.461905
		-15.3798	0.450113		-13.7519	0.461376
		-15.372	0.450113		-13.7377	0.460317
		-15.3642	0.451247		-13.7236	0.452381
		-15.3565	0.449358		-13.7095	0.446561
		-15.3487	0.449735		-13.6954	0.467196
		-15.3409	0.455404		-13.6814	0.481482
		-15.3332	0.459184		-13.6674	0.480423
		-15.3254	0.45805		-13.6534	0.473545
		-15.3177	0.45616		-13.6395	0.461376
		-15.3099	0.446712		-13.6256	0.449206
		-15.3022	0.441799		-13.6118	0.456085
		-15.2945	0.437642		-13.5979	0.45873
		-15.2867	0.442177		-13.5842	0.451852
		-15.279	0.44898		-13.5704	0.445503
		-15.2713	0.453137		-13.5567	0.443915
		-15.2636	0.455026		-13.543	0.434392
		-15.2559	0.450113		-13.5293	0.431746
		-15.2482	0.440287		-13.5157	0.43545
		-15.2405	0.437264		-13.5021	0.439683
		-15.2328	0.439531		-13.4885	0.435979
		-15.2251	0.438775		-13.475	0.433862
		-15.2174	0.43613		-13.4615	0.429101
		-15.2098	0.437264		-13.448	0.419577
		-15.2021	0.444822		-13.4345	0.414286
		-15.1944	0.448224		-13.4211	0.414286
		-15.1867	0.448602		-13.4077	0.41746
		-15.1791	0.445578		-13.3944	0.419577
		-15.1714	0.445578		-13.381	0.42963
		-15.1637	0.437642		-13.3677	0.433862
		-15.1561	0.430839		-13.3545	0.442857
		-15.1484	0.429705		-13.3412	0.442857
		-15.1408	0.431217		-13.328	0.442857
		-15.1331	0.434618		-13.3148	0.437037
		-15.1255	0.436508		-13.3017	0.437037
		-15.1178	0.434996		-13.2886	0.446032
		-15.1102	0.439153		-13.2755	0.466138
		-15.1025	0.442555		-13.2624	0.474074
		-15.0949	0.439531		-13.2494	0.472487
		-15.0872	0.436886		-13.2363	0.47037
		-15.0796	0.444067		-13.2234	0.466138
		-15.072	0.442555		-13.2104	0.47619
		-15.0643	0.444822		-13.1975	0.47619
		-15.0567	0.445956		-13.1846	0.474074
		-15.049	0.442555		-13.1717	0.474603
		-15.0414	0.436886		-13.1588	0.477778
		-15.0338	0.438775		-13.146	0.468783
		-15.0261	0.439531		-13.1332	0.46455
		-15.0185	0.440287		-13.1204	0.452381
		-15.0108	0.43802		-13.1077	0.450794
		-15.0032	0.439909		-13.0949	0.452381
		-14.9956	0.448602		-13.0822	0.451323
		-14.988	0.449735		-13.0696	0.441799
		-14.9803	0.449358		-13.0569	0.440212
		-14.9727	0.448602		-13.0443	0.446032
		-14.9651	0.453137		-13.0317	0.459259
		-14.9574	0.461829		-13.0191	0.467725
		-14.9498	0.464475		-13.0065	0.454497
		-14.9422	0.459562		-12.994	0.449735
		-14.9346	0.453515		-12.9815	0.457143
		-14.9269	0.448602		-12.969	0.453968
		-14.9193	0.44709		-12.9565	0.446032
		-14.9117	0.4452		-12.9441	0.448148
		-14.9041	0.443689		-12.9316	0.449735
		-14.8965	0.438775		-12.9192	0.454497
		-14.8889	0.444444		-12.9068	0.449206
		-14.8813	0.445578		-12.8944	0.444974
		-14.8737	0.443311		-12.8821	0.44709
		-14.8661	0.456916		-12.8697	0.451323
		-14.8585	0.45994		-12.8574	0.450265
		-14.8509	0.457294		-12.8451	0.45873
		-14.8434	0.450491		-12.8328	0.467725
		-14.8358	0.447468		-12.8205	0.473545
		-14.8282	0.454649		-12.8082	0.458201
		-14.8207	0.460317		-12.796	0.447619
		-14.8131	0.455026		-12.7837	0.44127
		-14.8056	0.451247		-12.7715	0.433862
		-14.7981	0.449358		-12.7593	0.441799
		-14.7905	0.445956		-12.7471	0.454497
		-14.783	0.444822		-12.7349	0.463492
		-14.7755	0.442933		-12.7227	0.473545
		-14.768	0.438398		-12.7105	0.461376
		-14.7605	0.441421		-12.6983	0.460847
		-14.753	0.444067		-12.6862	0.461905
		-14.7456	0.450869		-12.674	0.465608
		-14.7381	0.456916		-12.6619	0.470899
		-14.7307	0.453515		-12.6497	0.466138
		-14.7232	0.448602		-12.6376	0.449206
		-14.7158	0.447846		-12.6255	0.450794
		-14.7084	0.448602		-12.6133	0.455026
		-14.7009	0.452759		-12.6012	0.464021
		-14.6935	0.453893		-12.5891	0.461376
		-14.6862	0.460317		-12.577	0.459259
		-14.6788	0.463719		-12.5648	0.457672
		-14.6714	0.458428		-12.5527	0.45873
		-14.6641	0.45616		-12.5406	0.463492
		-14.6567	0.454271		-12.5285	0.470899
		-14.6494	0.452003		-12.5164	0.474074
		-14.642	0.451625		-12.5042	0.466138
		-14.6347	0.455026		-12.4921	0.463492
		-14.6274	0.456916		-12.48	0.458201
		-14.6201	0.453515		-12.4679	0.453968
		-14.6128	0.455026		-12.4558	0.459259
		-14.6055	0.453137		-12.4436	0.462963
		-14.5983	0.450491		-12.4315	0.467196
		-14.591	0.447846		-12.4194	0.478307
		-14.5837	0.445956		-12.4072	0.470899
		-14.5765	0.442933		-12.3951	0.457672
		-14.5693	0.443689		-12.3829	0.453439
		-14.562	0.44709		-12.3708	0.45873
		-14.5548	0.446712		-12.3586	0.468783
		-14.5476	0.443311		-12.3465	0.459788
		-14.5404	0.437264		-12.3343	0.441799
		-14.5332	0.445578		-12.3222	0.444444
		-14.526	0.452759		-12.31	0.439683
		-14.5188	0.456916		-12.2978	0.440212
		-14.5116	0.461451		-12.2857	0.437037
		-14.5044	0.459562		-12.2735	0.431217
		-14.4972	0.461073		-12.2613	0.431217
		-14.4901	0.45616		-12.2491	0.437037
		-14.4829	0.453515		-12.2369	0.432275
		-14.4757	0.455026		-12.2247	0.439683
		-14.4686	0.462585		-12.2126	0.438624
		-14.4614	0.474301		-12.2004	0.431217
		-14.4543	0.474679		-12.1882	0.430159
		-14.4471	0.473923		-12.176	0.436508
		-14.4399	0.464475		-12.1638	0.443915
		-14.4328	0.461073		-12.1516	0.44709
		-14.4256	0.458806		-12.1394	0.450794
		-14.4185	0.45994		-12.1272	0.456614
		-14.4113	0.467876		-12.115	0.460847
		-14.4042	0.473545		-12.1028	0.444974
		-14.397	0.473923		-12.0906	0.421164
		-14.3899	0.470899		-12.0784	0.410053
		-14.3827	0.469766		-12.0662	0.408466
		-14.3755	0.464097		-12.054	0.41164
		-14.3684	0.466742		-12.0418	0.407936
		-14.3612	0.46712		-12.0296	0.408995
		-14.354	0.463719		-12.0175	0.407936
		-14.3468	0.455026		-12.0053	0.416402
		-14.3397	0.453137		-11.9932	0.415873
		-14.3325	0.449358		-11.981	0.412698
		-14.3253	0.451625		-11.9689	0.413228
		-14.3181	0.452381		-11.9568	0.419048
		-14.3109	0.451625		-11.9447	0.420106
		-14.3037	0.449735		-11.9325	0.41746
		-14.2964	0.455404		-11.9205	0.419577
		-14.2892	0.452381		-11.9084	0.422751
		-14.282	0.449735		-11.8963	0.426455
		-14.2748	0.448224		-11.8843	0.437037
		-14.2675	0.454649		-11.8722	0.438095
		-14.2603	0.454649		-11.8602	0.425926
		-14.253	0.45616		-11.8482	0.422751
		-14.2457	0.452003		-11.8362	0.424868
		-14.2385	0.44709		-11.8243	0.437037
		-14.2312	0.4452		-11.8123	0.437037
		-14.2239	0.442177		-11.8004	0.449206
		-14.2166	0.445578		-11.7885	0.457143
		-14.2093	0.445956		-11.7766	0.452381
		-14.202	0.436508		-11.7648	0.444444
		-14.1947	0.433107		-11.7529	0.455026
		-14.1874	0.436886		-11.7411	0.467725
		-14.18	0.439531		-11.7293	0.469312
		-14.1727	0.443311		-11.7175	0.469841
		-14.1654	0.442177		-11.7058	0.461376
		-14.158	0.438398		-11.6941	0.458201
		-14.1507	0.433484		-11.6824	0.461376
		-14.1433	0.433484		-11.6707	0.463492
		-14.136	0.43424		-11.6591	0.460317
		-14.1286	0.435374		-11.6475	0.454497
		-14.1212	0.445956		-11.6359	0.448148
		-14.1139	0.443311		-11.6244	0.446032
		-14.1065	0.441043		-11.6128	0.459259
		-14.0991	0.437642		-11.6013	0.458201
		-14.0917	0.44709		-11.5899	0.455026
		-14.0843	0.44709		-11.5785	0.45291
		-14.0769	0.441799		-11.5671	0.453439
		-14.0695	0.441043		-11.5557	0.455556
		-14.0621	0.443311		-11.5444	0.46455
		-14.0547	0.445578		-11.5331	0.467196
		-14.0473	0.4452		-11.5218	0.468783
		-14.0399	0.439909		-11.5106	0.479365
		-14.0325	0.441421		-11.4994	0.491005
		-14.0251	0.446334		-11.4882	0.486243
		-14.0177	0.450113		-11.4771	0.481482
		-14.0103	0.451247		-11.466	0.486243
		-14.0029	0.450113		-11.4549	0.484127
		-13.9955	0.455026		-11.4439	0.478836
		-13.988	0.457294		-11.4329	0.472487
		-13.9806	0.456916		-11.422	0.457672
		-13.9732	0.450491		-11.4111	0.445503
		-13.9658	0.447846		-11.4002	0.448677
		-13.9584	0.44709		-11.3894	0.457672
		-13.9509	0.450491		-11.3786	0.447619
		-13.9435	0.452381		-11.3678	0.443386
		-13.9361	0.451247		-11.3571	0.450265
		-13.9287	0.450113		-11.3464	0.462963
		-13.9212	0.443689		-11.3358	0.469841
		-13.9138	0.44898		-11.3252	0.47672
		-13.9064	0.449735		-11.3146	0.478307
		-13.8989	0.441421		-11.3041	0.483069
		-13.8915	0.436886		-11.2936	0.486772
		-13.8841	0.439153		-11.2831	0.481482
		-13.8766	0.441043		-11.2727	0.474074
		-13.8692	0.451247		-11.2624	0.466667
		-13.8618	0.45805		-11.252	0.452381
		-13.8543	0.455782		-11.2417	0.442328
		-13.8469	0.453893		-11.2315	0.437037
		-13.8394	0.449358		-11.2213	0.439683
		-13.832	0.451247		-11.2111	0.443915
		-13.8245	0.454649		-11.2009	0.44709
		-13.8171	0.450869		-11.1908	0.448677
		-13.8096	0.444444		-11.1808	0.450794
		-13.8021	0.443311		-11.1707	0.442328
		-13.7947	0.447468		-11.1607	0.438624
		-13.7872	0.448602		-11.1508	0.448148
		-13.7797	0.441043		-11.1409	0.451852
		-13.7722	0.442177		-11.131	0.451852
		-13.7647	0.446712		-11.1211	0.457143
		-13.7572	0.445578		-11.1113	0.462434
		-13.7497	0.43802		-11.1015	0.461376
		-13.7422	0.436886		-11.0918	0.459259
		-13.7347	0.436886		-11.0821	0.450265
		-13.7272	0.437264		-11.0724	0.450265
		-13.7197	0.440665		-11.0628	0.464021
		-13.7121	0.438775		-11.0532	0.469312
		-13.7046	0.441043		-11.0436	0.468783
		-13.697	0.437642		-11.0341	0.465608
		-13.6895	0.439531		-11.0246	0.451852
		-13.6819	0.43802		-11.0151	0.457143
		-13.6743	0.43613		-11.0057	0.472487
		-13.6667	0.437642		-10.9963	0.486243
		-13.6592	0.43613		-10.9869	0.491534
		-13.6516	0.431595		-10.9776	0.489947
		-13.6439	0.429705		-10.9683	0.494709
		-13.6363	0.433484		-10.959	0.491534
		-13.6287	0.439909		-10.9497	0.491005
		-13.621	0.445956		-10.9405	0.498413
		-13.6134	0.445956		-10.9313	0.496296
		-13.6057	0.441799		-10.9222	0.492593
		-13.598	0.43802		-10.9131	0.485714
		-13.5903	0.434996		-10.904	0.480423
		-13.5826	0.431595		-10.8949	0.474074
		-13.5749	0.434618		-10.8859	0.471958
		-13.5672	0.434996		-10.8769	0.482011
		-13.5594	0.440665		-10.8679	0.488889
		-13.5516	0.442177		-10.859	0.485185
		-13.5439	0.438398		-10.8501	0.478307
		-13.5361	0.43613		-10.8412	0.475661
		-13.5283	0.437642		-10.8323	0.474603
		-13.5204	0.43424		-10.8235	0.465079
		-13.5126	0.432729		-10.8147	0.461905
		-13.5047	0.425548		-10.806	0.459788
		-13.4969	0.420257		-10.7972	0.451852
		-13.489	0.424036		-10.7885	0.456614
		-13.4811	0.429327		-10.7799	0.468254
		-13.4731	0.433862		-10.7712	0.467196
		-13.4652	0.432351		-10.7626	0.459788
		-13.4572	0.431217		-10.754	0.46455
		-13.4492	0.428194		-10.7454	0.465079
		-13.4412	0.433107		-10.7369	0.464021
		-13.4332	0.434618		-10.7284	0.455556
		-13.4252	0.436886		-10.7199	0.458201
		-13.4171	0.43613		-10.7114	0.461905
		-13.409	0.430839		-10.703	0.464021
		-13.4009	0.43424		-10.6946	0.459259
		-13.3928	0.443689		-10.6862	0.46455
		-13.3846	0.444444		-10.6778	0.468783
		-13.3765	0.442177		-10.6695	0.462963
		-13.3683	0.442177		-10.6611	0.467196
		-13.3601	0.442933		-10.6528	0.466667
		-13.3518	0.442555		-10.6446	0.469312
		-13.3436	0.445956		-10.6363	0.462434
		-13.3353	0.442177		-10.6281	0.451852
		-13.327	0.441799		-10.6199	0.451852
		-13.3187	0.448224		-10.6117	0.453968
		-13.3103	0.450869		-10.6035	0.449735
		-13.302	0.452381		-10.5954	0.444444
		-13.2936	0.455026		-10.5872	0.436508
		-13.2852	0.456538		-10.5791	0.442857
		-13.2767	0.454649		-10.571	0.443915
		-13.2683	0.453893		-10.5629	0.446561
		-13.2598	0.45616		-10.5549	0.457672
		-13.2513	0.455782		-10.5468	0.452381
		-13.2427	0.455782		-10.5388	0.446032
		-13.2342	0.448224		-10.5307	0.44127
		-13.2256	0.452759		-10.5227	0.437037
		-13.217	0.452381		-10.5147	0.441799
		-13.2084	0.453137		-10.5067	0.441799
		-13.1997	0.450113		-10.4988	0.443386
		-13.1911	0.44709		-10.4908	0.438624
		-13.1824	0.444067		-10.4828	0.438095
		-13.1736	0.441421		-10.4749	0.444444
		-13.1649	0.445956		-10.467	0.443386
		-13.1561	0.452381		-10.459	0.439683
		-13.1473	0.449735		-10.4511	0.437037
		-13.1385	0.451625		-10.4432	0.433862
		-13.1297	0.451625		-10.4353	0.439153
		-13.1209	0.455026		-10.4274	0.43545
		-13.112	0.453137		-10.4195	0.438624
		-13.1031	0.444444		-10.4116	0.449206
		-13.0942	0.441799		-10.4037	0.453968
		-13.0853	0.4452		-10.3959	0.449206
		-13.0763	0.448224		-10.388	0.446561
		-13.0674	0.443311		-10.3801	0.436508
		-13.0584	0.445578		-10.3722	0.441799
		-13.0494	0.453515		-10.3644	0.449206
		-13.0404	0.461451		-10.3565	0.451852
		-13.0313	0.457294		-10.3486	0.453968
		-13.0223	0.457672		-10.3408	0.454497
		-13.0132	0.461073		-10.3329	0.462963
		-13.0042	0.461073		-10.325	0.460317
		-12.9951	0.462207		-10.3172	0.453968
		-12.986	0.457294		-10.3093	0.456085
		-12.9769	0.455782		-10.3014	0.460317
		-12.9678	0.458428		-10.2935	0.466667
		-12.9587	0.455404		-10.2857	0.469312
		-12.9495	0.45616		-10.2778	0.469841
		-12.9404	0.450869		-10.2699	0.460317
		-12.9313	0.445578		-10.262	0.454497
		-12.9221	0.441421		-10.2541	0.457143
		-12.913	0.442177		-10.2462	0.45873
		-12.9039	0.445956		-10.2383	0.466667
		-12.8947	0.452381		-10.2304	0.466138
		-12.8856	0.453137		-10.2225	0.459788
		-12.8764	0.453137		-10.2146	0.456614
		-12.8673	0.450113		-10.2066	0.450794
		-12.8582	0.446334		-10.1987	0.450265
		-12.849	0.446334		-10.1907	0.450794
		-12.8399	0.446712		-10.1828	0.444444
		-12.8308	0.449735		-10.1748	0.444974
		-12.8217	0.447468		-10.1669	0.451852
		-12.8126	0.446334		-10.1589	0.452381
		-12.8035	0.452381		-10.1509	0.45291
		-12.7944	0.453515		-10.1429	0.456085
		-12.7854	0.446334		-10.1349	0.45873
		-12.7763	0.436886		-10.1269	0.45873
		-12.7673	0.436886		-10.1188	0.461905
		-12.7583	0.442933		-10.1108	0.468783
		-12.7493	0.449358		-10.1028	0.471429
		-12.7403	0.447846		-10.0947	0.475132
		-12.7313	0.442933		-10.0866	0.474074
		-12.7224	0.431595		-10.0785	0.47037
		-12.7135	0.433107		-10.0704	0.472487
		-12.7046	0.434618		-10.0623	0.472487
		-12.6957	0.428949		-10.0542	0.47037
		-12.6868	0.422525		-10.0461	0.460317
		-12.678	0.420257		-10.0379	0.459788
		-12.6692	0.415344		-10.0298	0.468254
		-12.6604	0.406274		-10.0216	0.459788
		-12.6517	0.413832		-10.0134	0.457672
		-12.643	0.42328		-10.0052	0.461376
		-12.6343	0.424792		-9.99701	0.461905
		-12.6256	0.42706		-9.98878	0.460847
		-12.617	0.43424		-9.98054	0.458201
		-12.6084	0.438398		-9.97229	0.458201
		-12.5998	0.444444		-9.96403	0.449206
		-12.5913	0.443311		-9.95575	0.453968
		-12.5828	0.4452		-9.94745	0.457672
		-12.5744	0.437264		-9.93915	0.455556
		-12.566	0.435374		-9.93082	0.450265
		-12.5576	0.434618		-9.92249	0.445503
		-12.5493	0.434618		-9.91413	0.451852
		-12.541	0.425926		-9.90576	0.462963
		-12.5327	0.426682		-9.89738	0.468254
		-12.5245	0.425926		-9.88898	0.470899
		-12.5163	0.417611		-9.88057	0.469312
		-12.5082	0.41232		-9.87214	0.464021
		-12.5001	0.42328		-9.86369	0.462963
		-12.4921	0.423658		-9.85522	0.457143
		-12.4841	0.422147		-9.84674	0.448677
		-12.4761	0.42328		-9.83825	0.443386
		-12.4682	0.418745		-9.82974	0.459259
		-12.4604	0.418367		-9.82121	0.46455
		-12.4526	0.428194		-9.81266	0.478836
		-12.4448	0.428571		-9.8041	0.480423
		-12.4371	0.428194		-9.79552	0.478307
		-12.4295	0.428949		-9.78692	0.46455
		-12.4219	0.424792		-9.7783	0.451852
		-12.4143	0.428571		-9.76967	0.448148
		-12.4068	0.430839		-9.76102	0.443386
		-12.3993	0.434618		-9.75235	0.454497
		-12.3919	0.435374		-9.74367	0.460317
		-12.3845	0.441043		-9.73497	0.463492
		-12.3772	0.443689		-9.72625	0.465079
		-12.37	0.443311		-9.71751	0.473016
		-12.3627	0.442555		-9.70876	0.478836
		-12.3556	0.438398		-9.69999	0.477778
		-12.3485	0.437642		-9.6912	0.470899
		-12.3414	0.444444		-9.68239	0.47037
		-12.3344	0.44709		-9.67357	0.473545
		-12.3274	0.446712		-9.66473	0.468783
		-12.3205	0.451247		-9.65587	0.469841
		-12.3136	0.450491		-9.64699	0.47619
		-12.3068	0.445956		-9.6381	0.475661
		-12.3	0.438398		-9.62919	0.486772
		-12.2932	0.437642		-9.62026	0.493122
		-12.2865	0.439531		-9.61131	0.491534
		-12.2799	0.447468		-9.60235	0.487831
		-12.2733	0.443689		-9.59337	0.480423
		-12.2667	0.439153		-9.58437	0.473545
		-12.2602	0.43802		-9.57535	0.47619
		-12.2538	0.433862		-9.56632	0.479365
		-12.2473	0.424414		-9.55727	0.47672
		-12.2409	0.421769		-9.5482	0.483069
		-12.2346	0.426682		-9.53911	0.483069
		-12.2283	0.428949		-9.53001	0.482011
		-12.222	0.432351		-9.52089	0.479365
		-12.2158	0.440287		-9.51175	0.475661
		-12.2097	0.446712		-9.5026	0.47619
		-12.2035	0.45616		-9.49342	0.475132
		-12.1974	0.461073		-9.48423	0.468783
		-12.1914	0.456916		-9.47503	0.467196
		-12.1854	0.458428		-9.4658	0.467725
		-12.1794	0.455404		-9.45656	0.461376
		-12.1734	0.446712		-9.44731	0.466138
		-12.1675	0.442555		-9.43803	0.469312
		-12.1617	0.450113		-9.42874	0.463492
		-12.1559	0.460695		-9.41943	0.457672
		-12.1501	0.465986		-9.41011	0.459259
		-12.1443	0.464853		-9.40077	0.469312
		-12.1386	0.45994		-9.39141	0.466667
		-12.133	0.455026		-9.38203	0.461905
		-12.1273	0.453515		-9.37264	0.455556
		-12.1217	0.453893		-9.36323	0.460317
		-12.1162	0.448602		-9.35381	0.464021
		-12.1107	0.449358		-9.34437	0.467196
		-12.1052	0.449735		-9.33491	0.460317
		-12.0997	0.447468		-9.32543	0.456614
		-12.0943	0.443689		-9.31594	0.45291
		-12.089	0.446712		-9.30643	0.448148
		-12.0836	0.453515		-9.29691	0.438095
		-12.0783	0.450113		-9.28737	0.440741
		-12.0731	0.452381		-9.27782	0.444444
		-12.0678	0.450491		-9.26824	0.439153
		-12.0627	0.446712		-9.25866	0.445503
		-12.0575	0.444822		-9.24905	0.444444
		-12.0524	0.445578		-9.23944	0.455556
		-12.0474	0.441043		-9.2298	0.469312
		-12.0423	0.442177		-9.22015	0.462963
		-12.0373	0.444822		-9.21049	0.461376
		-12.0324	0.4452		-9.20081	0.456614
		-12.0275	0.447468		-9.19112	0.450265
		-12.0226	0.44709		-9.18141	0.450265
		-12.0177	0.448224		-9.17169	0.450265
		-12.0129	0.448602		-9.16195	0.459788
		-12.0081	0.449735		-9.1522	0.451323
		-12.0034	0.448602		-9.14243	0.430688
		-11.9987	0.449358		-9.13265	0.422751
		-11.994	0.448602		-9.12286	0.422751
		-11.9894	0.449735		-9.11305	0.428571
		-11.9848	0.451625		-9.10323	0.446561
		-11.9803	0.456916		-9.0934	0.443386
		-11.9758	0.452381		-9.08355	0.446032
		-11.9713	0.446712		-9.07369	0.442328
		-11.9668	0.452381		-9.06381	0.448677
		-11.9624	0.44898		-9.05392	0.450794
		-11.958	0.44709		-9.04402	0.456085
		-11.9537	0.449735		-9.03411	0.451852
		-11.9494	0.450869		-9.02418	0.449206
		-11.9451	0.449358		-9.01424	0.457672
		-11.9409	0.450491		-9.00428	0.466667
		-11.9367	0.455026		-8.99432	0.467196
		-11.9325	0.464475		-8.98434	0.466138
		-11.9284	0.46712		-8.97435	0.466138
		-11.9243	0.459562		-8.96434	0.461905
		-11.9202	0.452381		-8.95432	0.460847
		-11.9162	0.45616		-8.94429	0.466667
		-11.9122	0.462963		-8.93424	0.471429
		-11.9082	0.46901		-8.92418	0.467725
		-11.9043	0.473545		-8.91411	0.457143
		-11.9004	0.472789		-8.90403	0.45873
		-11.8965	0.468254		-8.89393	0.459788
		-11.8926	0.45805		-8.88381	0.456085
		-11.8888	0.451247		-8.87368	0.456085
		-11.8851	0.454649		-8.86354	0.46455
		-11.8813	0.458428		-8.85338	0.464021
		-11.8776	0.459562		-8.84321	0.456085
		-11.8739	0.459562		-8.83302	0.460847
		-11.8702	0.454649		-8.82282	0.460317
		-11.8666	0.450869		-8.8126	0.456085
		-11.8629	0.450113		-8.80236	0.453968
		-11.8594	0.456916		-8.79211	0.459788
		-11.8558	0.459562		-8.78184	0.459259
		-11.8523	0.457294		-8.77155	0.461376
		-11.8487	0.459562		-8.76125	0.46455
		-11.8453	0.456916		-8.75094	0.467725
		-11.8418	0.457672		-8.7406	0.457672
		-11.8383	0.452759		-8.73025	0.45291
		-11.8349	0.446334		-8.71988	0.446032
		-11.8315	0.447846		-8.70949	0.442857
		-11.8281	0.448224		-8.69908	0.451323
		-11.8248	0.449358		-8.68866	0.461905
		-11.8214	0.450869		-8.67821	0.45873
		-11.8181	0.450869		-8.66775	0.442857
		-11.8148	0.4452		-8.65727	0.438624
		-11.8115	0.441799		-8.64677	0.435979
		-11.8082	0.456538		-8.63625	0.434392
		-11.8049	0.459562		-8.62571	0.434392
		-11.8017	0.459184		-8.61516	0.444444
		-11.7984	0.453137		-8.60458	0.448148
		-11.7952	0.456916		-8.59398	0.453439
		-11.792	0.45616		-8.58336	0.455556
		-11.7888	0.455782		-8.57272	0.457143
		-11.7856	0.452759		-8.56206	0.450265
		-11.7824	0.445578		-8.55139	0.443386
		-11.7792	0.439909		-8.54068	0.442857
		-11.776	0.444444		-8.52996	0.442328
		-11.7728	0.441421		-8.51922	0.447619
		-11.7696	0.434996		-8.50846	0.440212
		-11.7665	0.435752		-8.49768	0.443915
		-11.7633	0.436508		-8.48687	0.446032
		-11.7601	0.442933		-8.47604	0.450265
		-11.757	0.44898		-8.4652	0.453439
		-11.7538	0.44898		-8.45433	0.455556
		-11.7506	0.449735		-8.44344	0.456085
		-11.7475	0.448224		-8.43252	0.448677
		-11.7443	0.43424		-8.42159	0.450794
		-11.7411	0.428194		-8.41063	0.450265
		-11.7379	0.426682		-8.39966	0.458201
		-11.7347	0.427438		-8.38866	0.459259
		-11.7315	0.429705		-8.37764	0.448677
		-11.7283	0.427816		-8.3666	0.433333
		-11.7251	0.435374		-8.35554	0.425926
		-11.7219	0.43613		-8.34445	0.426984
		-11.7186	0.43802		-8.33335	0.426984
		-11.7154	0.436886		-8.32222	0.425397
		-11.7121	0.435374		-8.31107	0.438624
		-11.7089	0.433107		-8.2999	0.446561
		-11.7056	0.430461		-8.28871	0.440741
		-11.7023	0.43424		-8.2775	0.430688
		-11.699	0.43424		-8.26627	0.425926
		-11.6957	0.439909		-8.25501	0.433333
		-11.6923	0.452759		-8.24374	0.440741
		-11.6889	0.448224		-8.23244	0.446032
		-11.6856	0.444444		-8.22113	0.445503
		-11.6822	0.447468		-8.20979	0.443386
		-11.6787	0.451625		-8.19843	0.450265
		-11.6753	0.444822		-8.18706	0.450794
		-11.6718	0.438775		-8.17566	0.451852
		-11.6683	0.441421		-8.16424	0.454497
		-11.6648	0.446712		-8.15281	0.451852
		-11.6613	0.450113		-8.14135	0.448677
		-11.6577	0.453515		-8.12988	0.448677
		-11.6542	0.456538		-8.11838	0.440741
		-11.6505	0.458806		-8.10687	0.443386
		-11.6469	0.453137		-8.09534	0.455556
		-11.6433	0.448602		-8.08379	0.457672
		-11.6396	0.452381		-8.07222	0.45291
		-11.6359	0.456538		-8.06064	0.446561
		-11.6321	0.455782		-8.04903	0.446561
		-11.6283	0.452759		-8.03741	0.455026
		-11.6246	0.453137		-8.02577	0.455556
		-11.6207	0.455782		-8.01412	0.451852
		-11.6169	0.45805		-8.00244	0.464021
		-11.613	0.454649		-7.99075	0.466138
		-11.6091	0.456916		-7.97904	0.467725
		-11.6051	0.45616		-7.96732	0.471429
		-11.6011	0.450869		-7.95557	0.47037
		-11.5971	0.44709		-7.94381	0.47037
		-11.5931	0.444444		-7.93204	0.469312
		-11.589	0.448602		-7.92024	0.475132
		-11.5849	0.445578		-7.90843	0.472487
		-11.5808	0.439909		-7.8966	0.463492
		-11.5766	0.440665		-7.88476	0.460847
		-11.5724	0.438775		-7.8729	0.465608
		-11.5682	0.437264		-7.86102	0.463492
		-11.564	0.444822		-7.84913	0.451323
		-11.5597	0.448602		-7.83722	0.442328
		-11.5553	0.450113		-7.82529	0.445503
		-11.551	0.445578		-7.81335	0.438095
		-11.5466	0.447468		-7.8014	0.441799
		-11.5422	0.447468		-7.78942	0.452381
		-11.5377	0.447846		-7.77744	0.465079
		-11.5332	0.445956		-7.76543	0.462434
		-11.5287	0.445578		-7.75341	0.459788
		-11.5242	0.440287		-7.74138	0.458201
		-11.5196	0.447468		-7.72933	0.458201
		-11.515	0.455404		-7.71727	0.465079
		-11.5103	0.455404		-7.70519	0.475661
		-11.5057	0.44709		-7.6931	0.478307
		-11.5009	0.448224		-7.68099	0.477778
		-11.4962	0.450491		-7.66887	0.47619
		-11.4914	0.450113		-7.65674	0.470899
		-11.4866	0.453137		-7.64459	0.462963
		-11.4818	0.459184		-7.63242	0.46455
		-11.4769	0.45994		-7.62025	0.458201
		-11.472	0.452759		-7.60806	0.457672
		-11.4671	0.452003		-7.59585	0.459259
		-11.4621	0.453893		-7.58364	0.457672
		-11.4572	0.456538		-7.5714	0.466667
		-11.4521	0.458806		-7.55916	0.471958
		-11.4471	0.455404		-7.54691	0.465608
		-11.442	0.447846		-7.53464	0.459259
		-11.4369	0.442933		-7.52236	0.463492
		-11.4318	0.453515		-7.51006	0.471958
		-11.4266	0.461073		-7.49775	0.468783
		-11.4215	0.454649		-7.48544	0.466138
		-11.4162	0.447468		-7.47311	0.457143
		-11.411	0.453137		-7.46077	0.453968
		-11.4058	0.45616		-7.44841	0.454497
		-11.4005	0.45616		-7.43605	0.450794
		-11.3952	0.455404		-7.42368	0.448148
		-11.3898	0.461829		-7.41129	0.44709
		-11.3845	0.461451		-7.39889	0.453968
		-11.3791	0.455782		-7.38649	0.453968
		-11.3737	0.452759		-7.37407	0.45873
		-11.3683	0.44709		-7.36164	0.452381
		-11.3629	0.439153		-7.34921	0.440212
		-11.3574	0.441043		-7.33676	0.437037
		-11.352	0.438398		-7.32431	0.437566
		-11.3465	0.43802		-7.31184	0.433333
		-11.341	0.441043		-7.29937	0.434392
		-11.3355	0.44898		-7.28688	0.428571
		-11.33	0.442177		-7.27439	0.424339
		-11.3244	0.445578		-7.26189	0.425926
		-11.3189	0.451247		-7.24939	0.425926
		-11.3133	0.45805		-7.23687	0.418519
		-11.3078	0.460695		-7.22434	0.421693
		-11.3022	0.461073		-7.21181	0.431217
		-11.2966	0.457672		-7.19927	0.435979
		-11.291	0.455404		-7.18673	0.446561
		-11.2854	0.465608		-7.17417	0.447619
		-11.2798	0.464097		-7.16161	0.439683
		-11.2742	0.463341		-7.14904	0.437566
		-11.2686	0.470522		-7.13647	0.434392
		-11.2629	0.473167		-7.12389	0.436508
		-11.2573	0.475057		-7.1113	0.444974
		-11.2517	0.474679		-7.09871	0.450265
		-11.2461	0.473167		-7.08611	0.453439
		-11.2405	0.470522		-7.07351	0.454497
		-11.2349	0.46712		-7.0609	0.447619
		-11.2292	0.469766		-7.04829	0.437566
		-11.2236	0.471655		-7.03567	0.426984
		-11.218	0.46901		-7.02304	0.410582
		-11.2124	0.46712		-7.01042	0.415873
		-11.2068	0.462963		-6.99778	0.413228
		-11.2012	0.462207		-6.98515	0.412698
		-11.1956	0.452759		-6.97251	0.414815
		-11.19	0.455026		-6.95986	0.42381
		-11.1845	0.455026		-6.94721	0.42328
		-11.1789	0.445956		-6.93456	0.42328
		-11.1733	0.43424		-6.92191	0.434392
		-11.1678	0.434996		-6.90926	0.439683
		-11.1622	0.439909		-6.8966	0.44127
		-11.1567	0.442933		-6.88394	0.437566
		-11.1512	0.448224		-6.87128	0.43545
		-11.1456	0.449358		-6.85862	0.436508
		-11.1401	0.44709		-6.84596	0.438624
		-11.1346	0.454271		-6.8333	0.44127
		-11.1292	0.452759		-6.82063	0.440741
		-11.1237	0.451247		-6.80797	0.436508
		-11.1182	0.451625		-6.79531	0.420635
		-11.1128	0.451247		-6.78265	0.420106
		-11.1073	0.451625		-6.76998	0.421693
		-11.1019	0.446334		-6.75732	0.427513
		-11.0965	0.443311		-6.74467	0.429101
		-11.0911	0.444444		-6.73201	0.426984
		-11.0857	0.444444		-6.71935	0.427513
		-11.0803	0.441043		-6.7067	0.437037
		-11.075	0.435374		-6.69405	0.444974
		-11.0696	0.437264		-6.6814	0.451852
		-11.0643	0.452381		-6.66875	0.449735
		-11.059	0.45994		-6.65611	0.442857
		-11.0536	0.457294		-6.64347	0.450265
		-11.0483	0.452003		-6.63084	0.457672
		-11.0431	0.442555		-6.61821	0.456614
		-11.0378	0.446334		-6.60559	0.456085
		-11.0325	0.450113		-6.59297	0.462963
		-11.0273	0.449735		-6.58036	0.464021
		-11.022	0.444444		-6.56776	0.456085
		-11.0168	0.444444		-6.55516	0.453968
		-11.0116	0.445578		-6.54257	0.456085
		-11.0064	0.447846		-6.52999	0.455556
		-11.0012	0.450113		-6.51742	0.453968
		-10.996	0.453893		-6.50486	0.459788
		-10.9909	0.456916		-6.49231	0.471958
		-10.9857	0.453893		-6.47977	0.475132
		-10.9806	0.448602		-6.46724	0.468783
		-10.9754	0.442555		-6.45472	0.469841
		-10.9703	0.434618		-6.44222	0.471429
		-10.9652	0.433484		-6.42972	0.479894
		-10.9601	0.438398		-6.41724	0.491534
		-10.955	0.437642		-6.40478	0.488889
		-10.9499	0.432351		-6.39233	0.483069
		-10.9448	0.43424		-6.37989	0.483069
		-10.9397	0.438775		-6.36748	0.480423
		-10.9346	0.442177		-6.35508	0.478836
		-10.9296	0.438775		-6.34269	0.467725
		-10.9245	0.439909		-6.33033	0.462434
		-10.9194	0.440287		-6.31798	0.45873
		-10.9144	0.43613		-6.30565	0.457143
		-10.9093	0.438775		-6.29335	0.461376
		-10.9043	0.439909		-6.28106	0.466667
		-10.8992	0.446334		-6.2688	0.468254
		-10.8942	0.445956		-6.25655	0.462434
		-10.8891	0.446334		-6.24433	0.45873
		-10.884	0.447846		-6.23214	0.45873
		-10.879	0.449358		-6.21997	0.465608
		-10.8739	0.448602		-6.20782	0.466138
		-10.8689	0.446712		-6.1957	0.459788
		-10.8638	0.443689		-6.1836	0.466667
		-10.8587	0.439909		-6.17154	0.468783
		-10.8537	0.443311		-6.15949	0.465079
		-10.8486	0.448602		-6.14748	0.467725
		-10.8435	0.452003		-6.13549	0.459788
		-10.8384	0.451625		-6.12354	0.456085
		-10.8333	0.452003		-6.11161	0.453968
		-10.8282	0.450869		-6.09971	0.449735
		-10.8231	0.453893		-6.08784	0.446561
		-10.818	0.45994		-6.076	0.442857
		-10.8129	0.452759		-6.06418	0.433333
		-10.8077	0.443689		-6.0524	0.442328
		-10.8026	0.449735		-6.04065	0.456085
		-10.7974	0.450113		-6.02893	0.456614
		-10.7923	0.452759		-6.01724	0.456085
		-10.7871	0.444444		-6.00559	0.460317
		-10.7819	0.439153		-5.99396	0.456085
		-10.7767	0.442933		-5.98236	0.459788
		-10.7715	0.441799		-5.9708	0.462963
		-10.7662	0.440665		-5.95926	0.464021
		-10.761	0.434618		-5.94776	0.461376
		-10.7558	0.439153		-5.93629	0.46455
		-10.7505	0.434996		-5.92485	0.472487
		-10.7452	0.434618		-5.91343	0.467725
		-10.7399	0.43424		-5.90205	0.461905
		-10.7346	0.431973		-5.8907	0.469312
		-10.7293	0.437642		-5.87938	0.469841
		-10.724	0.435752		-5.86809	0.468783
		-10.7186	0.434996		-5.85683	0.462434
		-10.7133	0.441421		-5.84559	0.462434
		-10.7079	0.437642		-5.83439	0.471429
		-10.7025	0.433484		-5.82321	0.478307
		-10.6971	0.429705		-5.81206	0.480423
		-10.6916	0.436508		-5.80094	0.486772
		-10.6862	0.443311		-5.78985	0.498942
		-10.6807	0.440665		-5.77879	0.497354
		-10.6752	0.444444		-5.76775	0.500529
		-10.6698	0.441799		-5.75673	0.498413
		-10.6642	0.444444		-5.74575	0.493651
		-10.6587	0.443689		-5.73479	0.496296
		-10.6532	0.450113		-5.72385	0.502116
		-10.6476	0.44709		-5.71294	0.489418
		-10.642	0.439531		-5.70205	0.477249
		-10.6364	0.439909		-5.69119	0.47619
		-10.6308	0.442177		-5.68035	0.484656
		-10.6251	0.441799		-5.66954	0.48254
		-10.6194	0.43802		-5.65875	0.469841
		-10.6138	0.434996		-5.64798	0.46455
		-10.6081	0.435374		-5.63723	0.466667
		-10.6023	0.43613		-5.6265	0.46455
		-10.5966	0.435374		-5.61579	0.466667
		-10.5908	0.430083		-5.6051	0.462434
		-10.585	0.432729		-5.59444	0.462963
		-10.5792	0.435374		-5.58379	0.471958
		-10.5734	0.435374		-5.57316	0.485714
		-10.5676	0.433484		-5.56254	0.487831
		-10.5617	0.442177		-5.55195	0.485714
		-10.5558	0.450491		-5.54137	0.467725
		-10.5499	0.454271		-5.53081	0.468783
		-10.544	0.447468		-5.52026	0.470899
		-10.5381	0.438398		-5.50972	0.474603
		-10.5321	0.432351		-5.49921	0.471429
		-10.5261	0.430083		-5.4887	0.46455
		-10.5201	0.427816		-5.47821	0.462963
		-10.5141	0.434618		-5.46773	0.460847
		-10.5081	0.440665		-5.45726	0.456085
		-10.502	0.448224		-5.4468	0.452381
		-10.496	0.446334		-5.43635	0.455556
		-10.4899	0.44709		-5.42591	0.452381
		-10.4838	0.44709		-5.41548	0.448148
		-10.4777	0.443311		-5.40506	0.449735
		-10.4715	0.444822		-5.39464	0.450265
		-10.4654	0.443689		-5.38424	0.457143
		-10.4592	0.445578		-5.37383	0.462963
		-10.4531	0.443689		-5.36344	0.45873
		-10.4469	0.448602		-5.35304	0.445503
		-10.4407	0.450491		-5.34265	0.445503
		-10.4345	0.451625		-5.33227	0.440212
		-10.4282	0.452759		-5.32189	0.437566
		-10.422	0.453137		-5.31151	0.43545
		-10.4157	0.451625		-5.30113	0.437037
		-10.4095	0.450113		-5.29076	0.442857
		-10.4032	0.450113		-5.28038	0.444444
		-10.3969	0.451625		-5.27	0.449206
		-10.3906	0.455782		-5.25963	0.444444
		-10.3843	0.45616		-5.24925	0.438624
		-10.378	0.441799		-5.23888	0.438624
		-10.3717	0.42706		-5.2285	0.446032
		-10.3653	0.428571		-5.21812	0.456614
		-10.359	0.434618		-5.20774	0.445503
		-10.3527	0.440287		-5.19736	0.440212
		-10.3463	0.444444		-5.18697	0.441799
		-10.3399	0.4452		-5.17658	0.442857
		-10.3336	0.442177		-5.16619	0.446561
		-10.3272	0.444822		-5.15579	0.446032
		-10.3208	0.453893		-5.14539	0.444444
		-10.3144	0.464475		-5.13499	0.444974
		-10.308	0.468254		-5.12458	0.449206
		-10.3016	0.462585		-5.11417	0.452381
		-10.2952	0.467498		-5.10376	0.455556
		-10.2888	0.470144		-5.09334	0.452381
		-10.2824	0.467876		-5.08291	0.450794
		-10.276	0.466364		-5.07249	0.452381
		-10.2695	0.461451		-5.06205	0.453439
		-10.2631	0.462585		-5.05162	0.46455
		-10.2567	0.461073		-5.04118	0.45873
		-10.2502	0.460317		-5.03073	0.44709
		-10.2438	0.457672		-5.02028	0.442328
		-10.2373	0.452003		-5.00983	0.446561
		-10.2309	0.453515		-4.99938	0.449206
		-10.2244	0.452759		-4.98892	0.444444
		-10.2179	0.456916		-4.97845	0.44709
		-10.2115	0.456538		-4.96799	0.461905
		-10.205	0.448602		-4.95752	0.471958
		-10.1985	0.446334		-4.94705	0.466667
		-10.192	0.450869		-4.93657	0.460317
		-10.1855	0.449358		-4.9261	0.457143
		-10.1791	0.447468		-4.91562	0.460317
		-10.1726	0.453137		-4.90513	0.457672
		-10.1661	0.448602		-4.89465	0.447619
		-10.1596	0.439153		-4.88416	0.443915
		-10.153	0.433107		-4.87368	0.451852
		-10.1465	0.444067		-4.86319	0.45291
		-10.14	0.454271		-4.8527	0.453439
		-10.1335	0.455026		-4.84221	0.451852
		-10.1269	0.45616		-4.83171	0.448148
		-10.1204	0.45616		-4.82122	0.449206
		-10.1139	0.448224		-4.81073	0.451323
		-10.1073	0.442177		-4.80023	0.461905
		-10.1008	0.438398		-4.78974	0.463492
		-10.0942	0.435752		-4.77925	0.47672
		-10.0876	0.434618		-4.76876	0.475132
		-10.0811	0.428949		-4.75827	0.467196
		-10.0745	0.433862		-4.74778	0.460317
		-10.0679	0.437642		-4.73729	0.462963
		-10.0613	0.428949		-4.7268	0.461905
		-10.0547	0.429705		-4.71632	0.45291
		-10.048	0.43802		-4.70584	0.452381
		-10.0414	0.442933		-4.69536	0.451852
		-10.0348	0.438775		-4.68489	0.45873
		-10.0282	0.438775		-4.67442	0.457672
		-10.0215	0.441043		-4.66395	0.461905
		-10.0148	0.432729		-4.65349	0.46455
		-10.0082	0.41421		-4.64304	0.47619
		-10.0015	0.399093		-4.63258	0.487831
		-9.99481	0.399093		-4.62213	0.479365
		-9.98812	0.40514		-4.61169	0.472487
		-9.98142	0.411187		-4.60125	0.469312
		-9.9747	0.416478		-4.59082	0.470899
		-9.96798	0.430839		-4.58039	0.461905
		-9.96125	0.442177		-4.56997	0.444974
		-9.95451	0.44709		-4.55955	0.439153
		-9.94776	0.443311		-4.54914	0.441799
		-9.941	0.43613		-4.53874	0.444974
		-9.93423	0.435374		-4.52834	0.45291
		-9.92745	0.434618		-4.51795	0.457143
		-9.92067	0.43802		-4.50756	0.458201
		-9.91387	0.439531		-4.49717	0.450794
		-9.90707	0.439909		-4.48679	0.442328
		-9.90025	0.443311		-4.47642	0.448148
		-9.89343	0.440287		-4.46605	0.453968
		-9.8866	0.439909		-4.45569	0.456085
		-9.87976	0.446712		-4.44533	0.460847
		-9.87292	0.4452		-4.43498	0.462434
		-9.86606	0.440665		-4.42463	0.459259
		-9.8592	0.433862		-4.41428	0.456085
		-9.85233	0.433107		-4.40394	0.456614
		-9.84545	0.427438		-4.3936	0.467196
		-9.83857	0.430839		-4.38326	0.471958
		-9.83167	0.428949		-4.37293	0.474074
		-9.82477	0.42517		-4.3626	0.471958
		-9.81787	0.419501		-4.35226	0.461905
		-9.81095	0.422903		-4.34194	0.467196
		-9.80403	0.417611		-4.33161	0.460317
		-9.7971	0.415344		-4.32128	0.461905
		-9.79017	0.419123		-4.31095	0.462434
		-9.78322	0.422147		-4.30062	0.451323
		-9.77627	0.422525		-4.29029	0.451852
		-9.76932	0.420257		-4.27996	0.450265
		-9.76235	0.418745		-4.26962	0.449206
		-9.75538	0.428949		-4.25928	0.467725
		-9.74841	0.431217		-4.24894	0.477249
		-9.74142	0.42706		-4.23859	0.480423
		-9.73443	0.432729		-4.22824	0.479894
		-9.72743	0.441421		-4.21789	0.472487
		-9.72043	0.440665		-4.20753	0.469841
		-9.71342	0.432729		-4.19716	0.483069
		-9.7064	0.435374		-4.18678	0.491534
		-9.69938	0.44709		-4.1764	0.493651
		-9.69234	0.454649		-4.16601	0.486772
		-9.68531	0.453893		-4.15561	0.490476
		-9.67826	0.450869		-4.1452	0.490476
		-9.67121	0.449735		-4.13479	0.487302
		-9.66416	0.450491		-4.12436	0.487302
		-9.6571	0.453893		-4.11392	0.471958
		-9.65003	0.454649		-4.10347	0.456085
		-9.64296	0.451247		-4.09301	0.451323
		-9.63588	0.449358		-4.08254	0.459788
		-9.62879	0.453515		-4.07205	0.456614
		-9.6217	0.453515		-4.06156	0.46455
		-9.6146	0.442933		-4.05105	0.471429
		-9.6075	0.442933		-4.04052	0.470899
		-9.60039	0.441421		-4.02999	0.472487
		-9.59327	0.437642		-4.01943	0.469312
		-9.58615	0.43802		-4.00887	0.469312
		-9.57902	0.441421		-3.99828	0.462434
		-9.57189	0.444067		-3.98768	0.45873
		-9.56475	0.440665		-3.97707	0.456614
		-9.5576	0.446334		-3.96644	0.454497
		-9.55044	0.446712		-3.95579	0.464021
		-9.54328	0.440287		-3.94513	0.463492
		-9.53612	0.441043		-3.93445	0.451852
		-9.52894	0.449735		-3.92375	0.443386
		-9.52176	0.450491		-3.91304	0.448148
		-9.51458	0.448602		-3.90231	0.447619
		-9.50738	0.450869		-3.89156	0.449206
		-9.50019	0.453515		-3.88079	0.457672
		-9.49298	0.454271		-3.87001	0.470899
		-9.48577	0.456538		-3.8592	0.478307
		-9.47855	0.453515		-3.84839	0.468254
		-9.47133	0.447468		-3.83755	0.466667
		-9.4641	0.450491		-3.8267	0.474603
		-9.45686	0.455404		-3.81582	0.47672
		-9.44962	0.455404		-3.80493	0.47619
		-9.44237	0.455026		-3.79403	0.469841
		-9.43512	0.454271		-3.7831	0.467196
		-9.42786	0.452003		-3.77216	0.471429
		-9.4206	0.449735		-3.7612	0.472487
		-9.41332	0.449735		-3.75022	0.47619
		-9.40604	0.455782		-3.73922	0.474074
		-9.39876	0.460695		-3.72821	0.465608
		-9.39147	0.464097		-3.71718	0.453968
		-9.38417	0.458806		-3.70612	0.446032
		-9.37686	0.445956		-3.69506	0.446032
		-9.36954	0.429327		-3.68397	0.455556
		-9.36222	0.422147		-3.67286	0.465608
		-9.35489	0.417611		-3.66174	0.460847
		-9.34755	0.421769		-3.6506	0.458201
		-9.34021	0.417611		-3.63944	0.460317
		-9.33285	0.424414		-3.62827	0.462434
		-9.32549	0.430839		-3.61707	0.460317
		-9.31812	0.437642		-3.60586	0.463492
		-9.31075	0.44709		-3.59464	0.460847
		-9.30336	0.449358		-3.58339	0.448677
		-9.29597	0.455026		-3.57213	0.443386
		-9.28857	0.45616		-3.56085	0.442857
		-9.28117	0.45805		-3.54956	0.448148
		-9.27375	0.459562		-3.53825	0.44709
		-9.26633	0.453893		-3.52692	0.44709
		-9.2589	0.457294		-3.51558	0.440212
		-9.25146	0.458806		-3.50422	0.438624
		-9.24402	0.453137		-3.49285	0.450265
		-9.23657	0.450869		-3.48146	0.448677
		-9.22911	0.455404		-3.47006	0.445503
		-9.22165	0.448602		-3.45864	0.453439
		-9.21418	0.441043		-3.4472	0.453968
		-9.2067	0.4452		-3.43575	0.458201
		-9.19921	0.448224		-3.42428	0.456614
		-9.19172	0.451625		-3.4128	0.462434
		-9.18423	0.452381		-3.40131	0.468254
		-9.17672	0.450113		-3.3898	0.469841
		-9.16922	0.45994		-3.37827	0.462963
		-9.1617	0.465231		-3.36673	0.465079
		-9.15419	0.465986		-3.35518	0.465079
		-9.14666	0.470144		-3.34362	0.46455
		-9.13914	0.466364		-3.33204	0.459788
		-9.13161	0.457294		-3.32044	0.453968
		-9.12407	0.462585		-3.30884	0.447619
		-9.11654	0.470899		-3.29722	0.456614
		-9.10899	0.471277		-3.28559	0.461905
		-9.10145	0.464475		-3.27395	0.459788
		-9.09391	0.459184		-3.26229	0.454497
		-9.08636	0.464475		-3.25063	0.449206
		-9.07881	0.468632		-3.23895	0.438624
		-9.07126	0.467498		-3.22727	0.440741
		-9.06371	0.470899		-3.21557	0.45291
		-9.05616	0.472033		-3.20387	0.466138
		-9.04861	0.471655		-3.19216	0.468783
		-9.04106	0.466364		-3.18044	0.45291
		-9.03351	0.460695		-3.16871	0.44127
		-9.02596	0.456538		-3.15697	0.443915
		-9.01841	0.457672		-3.14523	0.448148
		-9.01086	0.458428		-3.13348	0.454497
		-9.00331	0.455782		-3.12173	0.459788
		-8.99577	0.463719		-3.10997	0.465079
		-8.98822	0.465608		-3.0982	0.465079
		-8.98068	0.462963		-3.08644	0.462434
		-8.97314	0.458806		-3.07467	0.462434
		-8.96561	0.456538		-3.06289	0.450794
		-8.95807	0.455782		-3.05112	0.442328
		-8.95054	0.448602		-3.03934	0.439683
		-8.94302	0.44898		-3.02757	0.443915
		-8.93549	0.452003		-3.01579	0.452381
		-8.92798	0.450869		-3.00402	0.443915
		-8.92046	0.44709		-2.99225	0.437037
		-8.91295	0.438775		-2.98048	0.436508
		-8.90544	0.436508		-2.96871	0.439153
		-8.89794	0.440287		-2.95695	0.441799
		-8.89045	0.4452		-2.94519	0.438095
		-8.88296	0.4452		-2.93344	0.430688
		-8.87547	0.444822		-2.92169	0.431746
		-8.86799	0.445956		-2.90995	0.448677
		-8.86052	0.445956		-2.89822	0.456614
		-8.85306	0.44898		-2.8865	0.45291
		-8.84559	0.44709		-2.87478	0.444444
		-8.83814	0.44898		-2.86308	0.440741
		-8.83069	0.448602		-2.85138	0.440212
		-8.82325	0.446334		-2.8397	0.44709
		-8.81582	0.4452		-2.82803	0.450794
		-8.8084	0.441421		-2.81637	0.452381
		-8.80098	0.439909		-2.80473	0.439683
		-8.79358	0.439909		-2.7931	0.438095
		-8.78618	0.442933		-2.78148	0.43545
		-8.77879	0.43424		-2.76989	0.43545
		-8.77141	0.432729		-2.7583	0.425397
		-8.76405	0.439909		-2.74674	0.437037
		-8.75669	0.440665		-2.73519	0.444974
		-8.74934	0.441421		-2.72366	0.448148
		-8.74201	0.438775		-2.71215	0.455556
		-8.73468	0.436886		-2.70065	0.45291
		-8.72737	0.436886		-2.68918	0.450265
		-8.72007	0.432729		-2.67773	0.443915
		-8.71278	0.430839		-2.6663	0.446561
		-8.70551	0.432729		-2.6549	0.449735
		-8.69825	0.435374		-2.64351	0.452381
		-8.691	0.439531		-2.63215	0.457143
		-8.68377	0.440665		-2.62081	0.451852
		-8.67656	0.448602		-2.6095	0.446032
		-8.66936	0.450869		-2.59821	0.44709
		-8.66217	0.444444		-2.58694	0.446561
		-8.65501	0.431217		-2.57571	0.445503
		-8.64785	0.427438		-2.5645	0.439683
		-8.64072	0.429327		-2.55331	0.428571
		-8.6336	0.42517		-2.54216	0.434392
		-8.62651	0.425548		-2.53103	0.442328
		-8.61943	0.436886		-2.51993	0.448677
		-8.61237	0.448602		-2.50886	0.439683
		-8.60533	0.448224		-2.49782	0.44127
		-8.59831	0.452759		-2.48681	0.441799
		-8.59131	0.453893		-2.47584	0.441799
		-8.58433	0.454649		-2.46489	0.442328
		-8.57737	0.456916		-2.45398	0.443386
		-8.57044	0.452003		-2.4431	0.439153
		-8.56352	0.450113		-2.43225	0.441799
		-8.55663	0.443689		-2.42143	0.457143
		-8.54976	0.441799		-2.41065	0.471429
		-8.54292	0.440665		-2.39991	0.473545
		-8.53609	0.437642		-2.3892	0.474603
		-8.52929	0.440665		-2.37852	0.475132
		-8.52252	0.4452		-2.36788	0.47672
		-8.51577	0.454271		-2.35728	0.471958
		-8.50905	0.445956		-2.34671	0.467196
		-8.50235	0.449735		-2.33618	0.466667
		-8.49568	0.455404		-2.32569	0.472487
		-8.48904	0.460317		-2.31523	0.467196
		-8.48242	0.461451		-2.30482	0.469312
		-8.47583	0.462207		-2.29444	0.465079
		-8.46927	0.455026		-2.2841	0.45873
		-8.46274	0.455404		-2.27379	0.456085
		-8.45624	0.456538		-2.26353	0.457672
		-8.44977	0.458428		-2.2533	0.460317
		-8.44334	0.453515		-2.24312	0.448148
		-8.43693	0.453137		-2.23297	0.452381
		-8.43055	0.449735		-2.22287	0.448148
		-8.42421	0.453137		-2.2128	0.461376
		-8.4179	0.451625		-2.20277	0.478836
		-8.41162	0.446334		-2.19278	0.48254
		-8.40537	0.445956		-2.18283	0.473545
		-8.39916	0.446334		-2.17293	0.469841
		-8.39299	0.444822		-2.16306	0.47037
		-8.38684	0.446334		-2.15323	0.469312
		-8.38074	0.445578		-2.14344	0.462434
		-8.37466	0.449358		-2.13369	0.461905
		-8.36863	0.44898		-2.12398	0.462434
		-8.36262	0.452003		-2.11431	0.462434
		-8.35666	0.452759		-2.10468	0.462963
		-8.35073	0.452759		-2.09509	0.465079
		-8.34483	0.457672		-2.08554	0.461376
		-8.33897	0.460695		-2.07603	0.459259
		-8.33315	0.455404		-2.06656	0.460847
		-8.32736	0.452003		-2.05713	0.453968
		-8.32161	0.453515		-2.04774	0.458201
		-8.3159	0.452003		-2.03839	0.467725
[truncated: 18,004 more rows]
[truncated: 862 more columns]

## Sheet: Fig3C
	Preferred
		Before	MIRS
		34.6567	38.5629
		78.3743	98.6509
		85.1595	97.0849
		73.0461	94.5458
		83.3443	93.9355
		45.195	56.3648
		5.32987	6.76573
		16.9058	18.709
		23.821	24.3041
		65.4293	65.2438
		67.0894	73.2184
		21.3739	27.9967
		46.2689	51.9629
		81.7206	93.6016
		64.2648	70.0755
		80.985	91.6213
		63.5396	71.521
		53.54	76.3081
		29.8477	32.8924
		8.10648	9.74012
		55.9965	56.0641
		82.6795	89.0496
		56.425	61.3152
		92.1295	97.977
		63.9858	62.1937
		31.2121	34.2392
		14.7393	16.2448
		54.3516	69.6471
		22.5451	27.476
		84.1508	92.2751
		26.8248	30.8925
		85.5881	85.4072
		28.315	31.6364

## Sheet: Fig3D
	Null
		Before	MIRS
		59.8416	40.575
		83.6117	80.398
		75.3303	83.1746
		25.554	22.8167
		1.2157	0.304157
		55.8562	43.4435
		24.2763	22.5534
		21.5314	19.2541
		55.6243	48.8988
		40.3716	38.9868
		7.7029	7.47304
		25.0132	19.0131
		51.2721	44.898
		44.6803	35.4766
		8.73823	9.58609
		16.0927	11.998
		19.4979	17.1061
		11.4274	10.7052
		27.1224	16.5602
		36.2807	32.6105
		11.2844	10.4056
		12.9588	9.69517
		57.5209	51.0596
		29.7629	22.9594

## Sheet: Fig3E
Preferred
	Before			MIRS			After
	Mean	SEM		Mean	SEM		Mean	SEM
	1.11025	0.198488		1.06622	0.114586		0.921388	0.0889851
	1.13655	0.19666		1.09551	0.115306		0.951623	0.0920808
	1.1625	0.194979		1.12441	0.116298		0.981472	0.0952814
	1.18797	0.193439		1.15284	0.117516		1.01076	0.0985204
	1.21285	0.192027		1.1807	0.118928		1.0394	0.101755
	1.23701	0.190726		1.20786	0.120486		1.06724	0.104931
	1.26034	0.189515		1.2342	0.122139		1.09419	0.108002
	1.28275	0.188378		1.25965	0.123837		1.12014	0.110922
	1.30413	0.18728		1.28408	0.125525		1.14501	0.113677
	1.32441	0.186201		1.30736	0.127135		1.1687	0.116217
	1.34346	0.185126		1.32935	0.128614		1.19112	0.118518
	1.36122	0.18403		1.34999	0.129943		1.21223	0.12058
	1.37763	0.182898		1.36922	0.131099		1.23188	0.122367
	1.39258	0.181702		1.38701	0.132065		1.24998	0.123862
	1.40595	0.180412		1.40324	0.13284		1.26643	0.125044
	1.41764	0.179014		1.41778	0.133382		1.28112	0.125894
	1.42761	0.177486		1.43045	0.133629		1.29395	0.126374
	1.43581	0.175815		1.44108	0.133514		1.30481	0.126463
	1.44212	0.173979		1.44961	0.133021		1.31367	0.126163
	1.44647	0.171959		1.45592	0.132126		1.32044	0.125473
	1.44871	0.169742		1.45993	0.130815		1.32502	0.124373
	1.44881	0.167332		1.46166	0.129097		1.32729	0.122842
	1.44674	0.164731		1.46098	0.126943		1.32712	0.120848
	1.44235	0.161914		1.4579	0.124372		1.32445	0.118384
	1.43556	0.158885		1.45223	0.121322		1.3192	0.115449
	1.42624	0.155641		1.44389	0.1178		1.31129	0.11203
	1.41537	0.152304		1.43393	0.114035		1.30171	0.108339
	1.40496	0.14909		1.42459	0.110478		1.29252	0.104789
	1.39464	0.145946		1.41559	0.107107		1.28338	0.101315
	1.38442	0.142873		1.4069	0.103919		1.27425	0.0979038
	1.3743	0.139861		1.39852	0.100895		1.26517	0.0945662
	1.36432	0.136919		1.39048	0.0980664		1.25612	0.0912942
	1.35447	0.134039		1.38274	0.0953915		1.24713	0.0881008
	1.34484	0.131229		1.37525	0.092854		1.23825	0.0849972
	1.33548	0.128492		1.36798	0.0904434		1.22947	0.0819824
	1.32631	0.125832		1.36094	0.0881532		1.22076	0.079047
	1.31741	0.123262		1.35415	0.0859804		1.21221	0.076234
	1.30872	0.120764		1.34754	0.0839124		1.20385	0.0735453
	1.30024	0.118332		1.34108	0.0819272		1.19568	0.0709777
	1.29203	0.11598		1.33472	0.0800153		1.18768	0.0685336
	1.28406	0.1137		1.32852	0.0781982		1.17982	0.0661933
	1.27632	0.111484		1.32236	0.0764348		1.17213	0.0639649
	1.26882	0.109341		1.31631	0.0747498		1.16459	0.0618507
	1.2615	0.107255		1.31037	0.0731461		1.15714	0.0598309
	1.25433	0.105224		1.30452	0.0716121		1.14981	0.0579125
	1.24734	0.103258		1.29875	0.0701431		1.14266	0.0561227
	1.2406	0.101355		1.29315	0.0687685		1.1357	0.0544524
	1.23404	0.0995122		1.28776	0.0674855		1.12888	0.0528864
	1.22775	0.0977308		1.28255	0.0662814		1.12229	0.0514484
	1.22169	0.0960001		1.27749	0.0651479		1.11589	0.0501244
	1.21581	0.0943224		1.27253	0.0640779		1.10974	0.0489271
	1.21013	0.0926898		1.26768	0.0630732		1.10394	0.0478671
	1.20466	0.0911082		1.26293	0.0621113		1.0984	0.0469142
	1.19943	0.0895838		1.25826	0.0611888		1.09304	0.0460496
	1.19441	0.0881074		1.25369	0.0603134		1.08781	0.045261
	1.18952	0.0866796		1.24919	0.0594686		1.08269	0.0445355
	1.18475	0.0852995		1.2448	0.0586701		1.07774	0.0438819
	1.1801	0.0839643		1.24051	0.0579089		1.07291	0.0432858
	1.17556	0.0826746		1.23632	0.0571775		1.06816	0.0427411
	1.1711	0.0814288		1.23215	0.0564631		1.06355	0.042249
	1.16673	0.0802234		1.22806	0.0557783		1.05911	0.0418098
	1.16246	0.0790639		1.22411	0.0551326		1.05482	0.0414185
	1.15839	0.0779437		1.22028	0.0545223		1.05065	0.0410623
	1.15447	0.0768622		1.21659	0.0539543		1.0466	0.0407409
	1.15069	0.0758286		1.21305	0.0534296		1.04269	0.0404521
	1.14698	0.0748294		1.20965	0.052939		1.03892	0.0401987
	1.14335	0.0738661		1.20634	0.0524778		1.03525	0.0399736
	1.13978	0.0729236		1.20302	0.0520267		1.03174	0.0397818
	1.13626	0.0719913		1.19971	0.0515908		1.02846	0.0396255
	1.13284	0.0710706		1.19643	0.0511622		1.02543	0.0394989
	1.12943	0.070175		1.19318	0.0507473		1.02261	0.0393985
	1.1261	0.0693063		1.18999	0.0503515		1.01997	0.0393246
	1.12295	0.0684658		1.18689	0.0499711		1.0175	0.0392816
	1.11993	0.067656		1.18397	0.0496094		1.01523	0.0392635
	1.11699	0.0668761		1.18114	0.0492627		1.01312	0.0392641
	1.11413	0.0661298		1.17834	0.0489284		1.0112	0.0392818
	1.11139	0.0654154		1.17559	0.048611		1.00951	0.0393067
	1.10875	0.0647315		1.17298	0.0483119		1.00801	0.0393351
	1.10619	0.0640792		1.1706	0.0480373		1.00674	0.0393666
	1.10364	0.0634513		1.16848	0.0478021		1.00564	0.0393999
	1.10112	0.0628482		1.16656	0.047589		1.00474	0.0394376
	1.09859	0.0622742		1.1648	0.0473878		1.00402	0.039485
	1.09607	0.0617266		1.1632	0.0472118		1.00345	0.0395404
	1.09359	0.0612015		1.16176	0.0470481		1.00299	0.0396014
	1.09123	0.06069		1.16047	0.0468928		1.00266	0.0396701
	1.08895	0.0601941		1.15932	0.0467343		1.00238	0.0397439
	1.08674	0.0597227		1.15828	0.0465643		1.00222	0.0398211
	1.08463	0.059273		1.15734	0.0463885		1.00214	0.0399002
	1.08261	0.0588494		1.15639	0.0462113		1.00216	0.0399848
	1.08071	0.0584519		1.15544	0.0460324		1.00229	0.0400826
	1.0789	0.0580783		1.15451	0.0458468		1.00245	0.0401887
	1.07717	0.0577337		1.1536	0.0456554		1.00264	0.0402986
	1.07549	0.0574111		1.15268	0.0454602		1.00293	0.0404009
	1.07383	0.0571182		1.15174	0.0452631		1.00321	0.0405013
	1.07216	0.0568532		1.15078	0.0450748		1.00347	0.0405985
	1.07052	0.0566114		1.14979	0.0448851		1.00374	0.0406988
	1.06907	0.0563709		1.14885	0.0446896		1.00403	0.0407924
	1.06775	0.0561286		1.14796	0.0445049		1.00433	0.0408779
	1.06656	0.05588		1.14718	0.0443322		1.00466	0.0409592
	1.06545	0.0556375		1.14651	0.0441606		1.00501	0.0410343
	1.06441	0.0554066		1.14587	0.0439749		1.00543	0.0411057
	1.06344	0.0551789		1.14523	0.0437785		1.00595	0.0411817
	1.06254	0.0549461		1.14461	0.0435822		1.00653	0.0412565
	1.06166	0.0547071		1.14405	0.0433833		1.00712	0.0413231
	1.06086	0.0544522		1.14351	0.0431912		1.00768	0.041371
	1.06012	0.0541739		1.14302	0.0430102		1.00823	0.0414036
	1.05944	0.0538779		1.14255	0.0428298		1.00882	0.0414216
	1.0588	0.05357		1.14212	0.0426692		1.00942	0.0414315
	1.05821	0.0532626		1.14167	0.0425341		1.00995	0.0414239
	1.05769	0.0529541		1.14118	0.0424321		1.01047	0.0414031
	1.05714	0.0526446		1.14066	0.0423417		1.01093	0.0413713
	1.05654	0.0523352		1.14015	0.04226		1.01129	0.0413251
	1.05594	0.0520245		1.13968	0.0421822		1.01156	0.0412635
	1.05533	0.0517271		1.1393	0.0421155		1.0117	0.0411778
	1.05478	0.0514352		1.13898	0.042066		1.01171	0.0410658
	1.05426	0.0511546		1.13866	0.042033		1.01167	0.0409383
	1.05386	0.0508953		1.13839	0.0420198		1.01151	0.0407873
	1.05356	0.0506552		1.13809	0.0420233		1.01135	0.0406203
	1.05334	0.0504366		1.13782	0.0420407		1.01122	0.0404474
	1.05318	0.0502415		1.13764	0.0420508		1.01111	0.0402619
	1.05302	0.0500641		1.13756	0.0420492		1.011	0.0400763
	1.05283	0.0499011		1.13752	0.0420537		1.01087	0.0398805
	1.05256	0.0497477		1.13751	0.0420531		1.01072	0.0396828
	1.05226	0.0496065		1.13757	0.0420458		1.01056	0.0394783
	1.05193	0.049487		1.13768	0.042035		1.01039	0.0392569
	1.05152	0.0493897		1.13779	0.0420111		1.01026	0.0390211
	1.05107	0.049313		1.13791	0.0419731		1.01018	0.0387603
	1.0506	0.0492536		1.1381	0.0419403		1.0101	0.03848
	1.05015	0.0492023		1.13826	0.0419168		1.01003	0.03819
	1.04968	0.0491677		1.13837	0.0419035		1.00993	0.0378926
	1.04918	0.0491496		1.1385	0.0419005		1.00983	0.0375943
	1.0486	0.0491381		1.13857	0.0419055		1.00975	0.0373127
	1.048	0.0491364		1.13855	0.041921		1.00965	0.0370434
	1.04734	0.0491429		1.13846	0.0419422		1.00957	0.0367785
	1.04662	0.0491581		1.13831	0.0419636		1.00949	0.0365187
	1.04585	0.0491809		1.13809	0.0419832		1.00933	0.0362574
	1.04503	0.0492089		1.13791	0.0420053		1.00912	0.035987
	1.04417	0.0492436		1.13779	0.0420298		1.00881	0.0357087
	1.04326	0.0492821		1.13769	0.0420589		1.00847	0.0354324
	1.04231	0.0493167		1.13766	0.042099		1.00815	0.0351733
	1.04129	0.0493486		1.13768	0.0421458		1.00778	0.0349232
	1.04024	0.0493782		1.13767	0.0421878		1.00732	0.0346778
	1.03908	0.0494039		1.13763	0.0422301		1.00682	0.0344402
	1.03792	0.0494327		1.13758	0.0422723		1.0062	0.0342168
	1.03671	0.0494692		1.13752	0.0423227		1.00544	0.0340126
	1.03552	0.0495067		1.13747	0.0423775		1.00462	0.0338401
	1.0344	0.0495411		1.13743	0.0424244		1.00374	0.0336983
	1.03333	0.0495672		1.13744	0.0424559		1.00281	0.0335804
	1.03222	0.0495879		1.13751	0.0424706		1.00184	0.0334811
	1.03109	0.0496079		1.13765	0.0424827		1.0008	0.0334058
	1.02999	0.049627		1.13782	0.0424937		0.999695	0.0333497
	1.02895	0.0496429		1.13801	0.0425005		0.998541	0.033317
	1.02793	0.0496531		1.13818	0.0425034		0.997326	0.0332944
	1.02693	0.0496518		1.13835	0.0425099		0.996037	0.0332808
	1.02596	0.0496289		1.13841	0.0425232		0.994668	0.0332795
	1.02503	0.0495827		1.13845	0.0425439		0.99325	0.0332912
	1.02413	0.0495097		1.13843	0.0425718		0.991809	0.0333073
	1.02331	0.0494041		1.13838	0.0425955		0.99039	0.0333239
	1.02249	0.0492788		1.13823	0.0426338		0.988967	0.033342
	1.02173	0.0491276		1.138	0.0426822		0.987553	0.0333664
	1.02101	0.0489552		1.13776	0.0427353		0.986128	0.0334128
	1.02024	0.0487616		1.13759	0.0427914		0.984696	0.0334828
	1.01941	0.0485551		1.13753	0.0428609		0.983284	0.0335704
	1.01851	0.0483412		1.13761	0.0429403		0.981891	0.0336671
	1.01758	0.0481121		1.1377	0.0430176		0.980476	0.033776
	1.01674	0.0478544		1.13777	0.0430886		0.97915	0.0338809
	1.016	0.0475711		1.13783	0.0431636		0.977832	0.0339826
	1.01539	0.0472575		1.13786	0.0432435		0.976563	0.0340732
	1.01486	0.0469211		1.13789	0.0433329		0.975386	0.0341468
	1.01444	0.0465599		1.13792	0.0434195		0.974327	0.0341918
	1.01408	0.0461802		1.13798	0.0434951		0.97338	0.0342174
	1.01373	0.0457876		1.13812	0.0435599		0.972571	0.0342145
	1.01332	0.0453887		1.13821	0.0436095		0.971856	0.0341931
	1.01289	0.0449788		1.13823	0.0436404		0.971185	0.0341609
	1.01247	0.0445702		1.13823	0.0436478		0.970583	0.034113
	1.01204	0.0441616		1.1382	0.043636		0.970076	0.0340424
	1.01162	0.0437557		1.13817	0.0436021		0.96968	0.0339488
	1.01122	0.0433607		1.13816	0.0435532		0.969433	0.0338272
	1.01089	0.0429739		1.13813	0.0435035		0.969277	0.0336929
	1.01055	0.0426037		1.13815	0.0434577		0.969146	0.0335659
	1.01021	0.0422509		1.13819	0.0434014		0.969087	0.0334346
	1.00994	0.0419088		1.13821	0.0433359		0.969072	0.0333121
	1.00972	0.0415898		1.13821	0.0432714		0.969102	0.0331963
	1.00957	0.0412917		1.13822	0.0432053		0.969253	0.0330811
	1.00947	0.0410074		1.13821	0.04315		0.969508	0.0329666
	1.00939	0.0407399		1.13821	0.043114		0.969866	0.0328519
	1.00928	0.0404983		1.13821	0.0430937		0.970384	0.0327271
	1.00922	0.0402761		1.13823	0.0430788		0.970943	0.0326038
	1.00912	0.0400803		1.13822	0.0430708		0.971569	0.0324805
	1.00899	0.0399105		1.13819	0.0430748		0.972351	0.0323593
	1.00882	0.0397657		1.13818	0.0430894		0.973191	0.0322396
	1.00864	0.0396476		1.13825	0.043115		0.974093	0.0321192
	1.00839	0.0395607		1.1384	0.0431547		0.974969	0.0320194
	1.00818	0.0394913		1.13858	0.0432096		0.975812	0.0319402
	1.008	0.0394404		1.13873	0.043285		0.976663	0.0318779
	1.00788	0.0393959		1.13884	0.0433718		0.977542	0.0318333
	1.00787	0.0393483		1.13899	0.043467		0.978403	0.0318045
	1.00786	0.0393076		1.13922	0.0435768		0.979255	0.0317883
	1.0078	0.0392711		1.13959	0.0436965		0.980105	0.0317781
	1.00764	0.0392387		1.14009	0.0438231		0.980899	0.0317789
	1.00749	0.0392031		1.14061	0.0439594		0.981651	0.0317853
	1.00732	0.0391733		1.14113	0.0441073		0.982422	0.0318023
	1.0071	0.0391477		1.14166	0.0442703		0.98316	0.0318262
	1.00687	0.0391302		1.14211	0.0444466		0.98388	0.0318608
	1.00663	0.0391232		1.14244	0.0446383		0.984582	0.0319111
	1.00639	0.0391275		1.14268	0.0448429		0.985236	0.0319769
	1.00615	0.0391451		1.14278	0.045055		0.985836	0.0320487
	1.00591	0.0391728		1.14272	0.0452669		0.986381	0.0321257
	1.00563	0.0392084		1.14251	0.0454766		0.98683	0.0322002
	1.0054	0.0392474		1.14225	0.0456787		0.987175	0.0322783
	1.00516	0.0392858		1.14197	0.0458745		0.987372	0.0323521
	1.00496	0.0393118		1.14172	0.0460573		0.987462	0.032426
	1.00483	0.0393353		1.14145	0.0462347		0.987411	0.0325029
	1.00473	0.0393583		1.14122	0.0464009		0.987249	0.032582
	1.00467	0.0393703		1.14094	0.0465628		0.986977	0.0326594
	1.00469	0.0393804		1.14061	0.0467207		0.986639	0.032742
	1.00476	0.039393		1.14027	0.0468786		0.986257	0.0328254
	1.00486	0.0393895		1.13991	0.0470382		0.985747	0.0329015
	1.00494	0.0393877		1.1395	0.0472011		0.985086	0.0329695
	1.00498	0.0393942		1.13894	0.0473669		0.984307	0.0330439
	1.00498	0.0394021		1.13822	0.0475333		0.983451	0.0331311
	1.00489	0.0394085		1.13747	0.0476979		0.982521	0.0332305
	1.00471	0.039412		1.13665	0.0478696		0.981607	0.03333
	1.00444	0.0394096		1.13573	0.0480453		0.980673	0.0334267
	1.00408	0.0394091		1.1348	0.0482205		0.979661	0.033515
	1.00372	0.0394106		1.13377	0.0484019		0.978584	0.0335955
	1.00334	0.0394129		1.13271	0.0485794		0.977427	0.0336766
	1.00296	0.039413		1.13163	0.0487591		0.976215	0.0337621
	1.00255	0.0394165		1.13043	0.0489401		0.974886	0.0338492
	1.00213	0.039413		1.12921	0.0491258		0.97341	0.0339424
	1.00174	0.0394019		1.12795	0.0493137		0.971848	0.0340407
	1.0014	0.0393655		1.12668	0.0494938		0.970167	0.0341486
	1.00105	0.0393274		1.12537	0.04967		0.968344	0.0342687
	1.00073	0.0392854		1.12401	0.0498377		0.96642	0.0344057
	1.00043	0.0392354		1.12258	0.0500036		0.964429	0.0345617
	1.00012	0.0391892		1.12114	0.0501686		0.962463	0.0347266
	0.999792	0.0391515		1.11971	0.0503346		0.960544	0.0348872
	0.999437	0.0391163		1.11833	0.0504949		0.958548	0.0350469
	0.999077	0.0390846		1.11694	0.0506541		0.956503	0.0352034
	0.998704	0.0390542		1.11558	0.0508109		0.954476	0.0353478
	0.998336	0.0390225		1.11429	0.0509672		0.952368	0.035492
	0.99803	0.0389961		1.11304	0.0511169		0.950217	0.0356336
	0.997689	0.0389923		1.11184	0.0512608		0.947993	0.035774
	0.997414	0.0389962		1.11065	0.0513974		0.945722	0.0359204
	0.99718	0.0390122		1.10951	0.0515263		0.943476	0.036072
	0.996989	0.0390275		1.10847	0.0516412		0.941242	0.0362322
	0.996864	0.0390369		1.10763	0.0517316		0.939021	0.0364028
	0.996693	0.0390558		1.10687	0.0517954		0.936823	0.0365814
	0.996523	0.0390775		1.1062	0.0518314		0.934691	0.036761
	0.996289	0.0391102		1.1056	0.0518552		0.932597	0.0369522
	0.995992	0.0391641		1.10499	0.051869		0.930567	0.037148
	0.995654	0.0392419		1.10437	0.0518694		0.928636	0.0373366
	0.99525	0.0393448		1.10376	0.0518622		0.926815	0.0375176
	0.994758	0.0394701		1.10308	0.0518542		0.925146	0.0376946
	0.99418	0.0396205		1.10239	0.0518389		0.923659	0.0378646
	0.993527	0.0397948		1.10174	0.0518133		0.922371	0.0380192
	0.992801	0.0399894		1.10108	0.051772		0.921277	0.0381726
	0.992037	0.0402014		1.1004	0.0517169		0.920357	0.0383242
	0.991208	0.040437		1.09966	0.051658		0.919499	0.0384791
	0.990426	0.0406811		1.09895	0.0515825		0.918709	0.0386382
	0.989625	0.0409365		1.09817	0.0515033		0.917918	0.0388012
	0.988856	0.0411924		1.09739	0.0514384		0.917201	0.0389638
	0.988117	0.041456		1.0967	0.0513781		0.916551	0.0391237
	0.987435	0.0417295		1.09606	0.051327		0.91599	0.0392769
	0.986774	0.0420161		1.09539	0.0512663		0.915533	0.0394186
	0.986154	0.0423181		1.09476	0.0511811		0.91524	0.0395347
	0.985596	0.0426315		1.09412	0.051079		0.915145	0.0396171
	0.984993	0.0429583		1.09345	0.0509662		0.915153	0.0396821
	0.984398	0.0432938		1.09276	0.0508472		0.91524	0.0397325
	0.983796	0.0436424		1.09205	0.0507227		0.915437	0.0397663
	0.983174	0.0440022		1.09125	0.0505969		0.915742	0.0397872
	0.982512	0.0443713		1.0904	0.0504658		0.916082	0.0398046
	0.981778	0.0447547		1.08953	0.0503293		0.916616	0.0397915
	0.98095	0.04515		1.08862	0.0501836		0.917312	0.0397552
	0.980075	0.0455571		1.08772	0.0500311		0.918179	0.0396898
	0.979162	0.0459725		1.08676	0.0498796		0.919235	0.0395968
	0.978209	0.0463993		1.08581	0.0497282		0.920426	0.0394836
	0.977226	0.0468347		1.08479	0.049583		0.921723	0.0393599
	0.976209	0.0472792		1.08371	0.0494466		0.923122	0.039231
	0.975203	0.0477179		1.08255	0.0493236		0.924612	0.0390971
	0.974201	0.0481506		1.08124	0.049216		0.92613	0.0389648
	0.973201	0.0485785		1.07983	0.0491208		0.927638	0.0388406
	0.972196	0.048999		1.07829	0.0490391		0.929122	0.0387243
	0.971243	0.0494031		1.07665	0.0489744		0.930573	0.0386078
	0.970336	0.0497942		1.07487	0.0489324		0.932041	0.0384822
	0.969416	0.0501885		1.07301	0.0489074		0.933567	0.0383465
	0.968498	0.0505885		1.07121	0.0488836		0.935083	0.0382099
	0.967598	0.0509913		1.06943	0.0488652		0.936625	0.0380701
	0.966777	0.0513977		1.06763	0.0488627		0.938171	0.0379324
	0.966012	0.0518044		1.06585	0.0488714		0.939691	0.0378016
	0.965332	0.0521984		1.06406	0.0488992		0.941155	0.0376789
	0.964705	0.0525802		1.06229	0.0489525		0.942561	0.0375565
	0.96411	0.0529532		1.06056	0.0490283		0.943853	0.0374311
	0.963614	0.0532924		1.05883	0.0491239		0.945049	0.0373116
	0.96313	0.0536048		1.05715	0.0492337		0.946168	0.0371954
	0.962703	0.0538919		1.05555	0.0493548		0.947151	0.0370941
	0.962329	0.0541562		1.05408	0.0494807		0.948003	0.0370058
	0.961939	0.0544097		1.0527	0.049605		0.94876	0.0369308
	0.961634	0.0546402		1.05138	0.0497293		0.949407	0.0368617
	0.96141	0.0548545		1.05013	0.0498558		0.94993	0.0368078
	0.961239	0.0550645		1.04895	0.0499859		0.950343	0.0367652
	0.961057	0.0552789		1.04785	0.0501139		0.95062	0.0367373
	0.960813	0.0554996		1.04682	0.0502437		0.95077	0.0367206
	0.960525	0.0557273		1.04579	0.0503805		0.950827	0.0367154
	0.960185	0.0559595		1.04484	0.0505174		0.950802	0.036715
	0.959802	0.0561947		1.04407	0.0506529		0.950736	0.0367172
	0.959412	0.0564317		1.04344	0.0507971		0.95064	0.036737
	0.959013	0.0566707		1.04292	0.0509447		0.950485	0.03677
	0.958592	0.0569129		1.04248	0.0510916		0.950184	0.0368137
	0.958163	0.0571601		1.04216	0.0512372		0.949757	0.0368777
	0.957693	0.0574159		1.04184	0.0513904		0.949175	0.0369609
	0.957198	0.0576682		1.04156	0.0515368		0.948494	0.037063
	0.95675	0.0579002		1.04136	0.0516653		0.94775	0.0371695
	0.956395	0.05811		1.04117	0.0517821		0.946998	0.0372847
	0.956037	0.0583111		1.04101	0.0518802		0.946231	0.0374055
	0.955674	0.058501		1.04108	0.0519444		0.94548	0.0375182
	0.955302	0.058678		1.04125	0.0519846		0.944644	0.0376242
	0.954947	0.0588341		1.04148	0.0520071		0.943747	0.037725
	0.954668	0.0589589		1.04172	0.0520148		0.942839	0.037823
	0.954397	0.059064		1.04197	0.0520168		0.941911	0.0379095
	0.954128	0.0591472		1.04217	0.0520225		0.94093	0.0379887
	0.953873	0.0592129		1.04233	0.0520318		0.939883	0.0380642
	0.953654	0.0592655		1.04246	0.0520416		0.938843	0.0381357
	0.953437	0.0593032		1.04255	0.0520478		0.937811	0.0382017
	0.953222	0.0593271		1.04271	0.0520329		0.936838	0.0382583
	0.953064	0.0593288		1.04291	0.0519977		0.935863	0.0383123
	0.952946	0.0593098		1.04312	0.0519503		0.9349	0.0383611
	0.952889	0.0592554		1.04334	0.0518862		0.93394	0.0383987
	0.952882	0.0591706		1.04357	0.051809		0.933017	0.03843
	0.952828	0.0590772		1.04382	0.0517282		0.932087	0.038458
	0.952753	0.0589664		1.04406	0.0516352		0.931106	0.0384875
	0.952663	0.0588364		1.04426	0.0515387		0.930078	0.0385155
	0.952524	0.0586941		1.04439	0.0514465		0.929016	0.0385402
	0.952338	0.0585431		1.04441	0.0513559		0.927896	0.0385603
	0.952145	0.0583872		1.04434	0.0512604		0.926778	0.0385652
	0.951922	0.0582319		1.04423	0.0511641		0.925652	0.0385615
	0.951632	0.0580792		1.04409	0.0510623		0.924453	0.0385562
	0.951265	0.0579249		1.04381	0.050959		0.923263	0.0385454
	0.950822	0.0577692		1.04344	0.0508646		0.922096	0.0385288
	0.950306	0.0576136		1.04306	0.0507673		0.920964	0.0385053
	0.949801	0.0574427		1.04264	0.0506816		0.919875	0.0384746
	0.949241	0.0572626		1.04214	0.0506024		0.918853	0.0384283
	0.948624	0.0570738		1.04159	0.0505312		0.917819	0.0383747
	0.948	0.0568689		1.04094	0.0504716		0.916847	0.0383114
	0.947334	0.0566494		1.04024	0.0504199		0.915952	0.0382388
	0.946677	0.0564195		1.03955	0.0503757		0.915051	0.038166
	0.945999	0.056185		1.0388	0.0503336		0.914151	0.0380887
	0.945322	0.0559401		1.03796	0.0502864		0.91328	0.0380091
	0.944688	0.0556772		1.03708	0.050231		0.912415	0.0379319
	0.94412	0.0553954		1.03615	0.0501762		0.911537	0.0378647
	0.943574	0.0551012		1.03512	0.0501229		0.910658	0.0377963
	0.943001	0.0548081		1.03407	0.0500728		0.90976	0.0377311
	0.942387	0.0545138		1.03301	0.0500236		0.908848	0.0376715
	0.941764	0.054215		1.03194	0.0499756		0.907896	0.0376214
	0.941117	0.0539141		1.03093	0.0499338		0.906917	0.0375794
	0.940385	0.0536162		1.03001	0.049908		0.905927	0.0375451
	0.939594	0.0533174		1.02915	0.049902		0.904908	0.0375237
	0.93875	0.0530178		1.02834	0.0499123		0.903881	0.0375091
	0.937811	0.0527246		1.02759	0.0499365		0.902845	0.0375075
	0.936859	0.0524379		1.02686	0.049975		0.901812	0.0375266
	0.935882	0.0521539		1.02609	0.05003		0.900792	0.0375626
	0.934793	0.0518748		1.02535	0.0501111		0.899756	0.0376096
	0.933639	0.0515885		1.02465	0.0502117		0.89876	0.037663
	0.932443	0.0512883		1.02399	0.0503364		0.897859	0.0377135
	0.931163	0.0509919		1.02331	0.0504667		0.897004	0.0377552
	0.92981	0.0506949		1.02274	0.0505943		0.89617	0.0377927
	0.928378	0.0503979		1.02218	0.0507228		0.89533	0.037824
	0.926894	0.0500952		1.02166	0.0508514		0.894489	0.0378561
	0.925368	0.0497873		1.02118	0.0509776		0.893677	0.0378941
	0.923745	0.0494867		1.02073	0.0511064		0.892888	0.0379414
	0.92201	0.0491914		1.02032	0.0512332		0.892126	0.0379896
	0.9202	0.0488917		1.0199	0.0513623		0.891414	0.0380376
	0.918348	0.0485865		1.01955	0.0514957		0.890742	0.0380819
	0.916527	0.0482748		1.01922	0.0516371		0.890129	0.038115
	0.914712	0.0479564		1.01891	0.0517732		0.889651	0.0381287
	0.912987	0.0476418		1.01866	0.0519012		0.889239	0.038134
	0.911362	0.0473363		1.0184	0.0520191		0.888845	0.0381366
	0.909886	0.0470329		1.01821	0.0521093		0.888494	0.0381229
	0.908568	0.0467335		1.01806	0.0521774		0.888177	0.0380986
	0.907298	0.0464326		1.01797	0.0522335		0.88785	0.0380727
	0.906081	0.0461403		1.01795	0.0522722		0.887548	0.0380511
	0.904926	0.0458526		1.01803	0.0523049		0.887304	0.0380331
	0.903757	0.0455665		1.01817	0.052335		0.887087	0.0380264
	0.902556	0.0452868		1.01835	0.0523677		0.886878	0.038037
	0.901349	0.0450163		1.01856	0.0523943		0.886656	0.0380594
	0.900106	0.0447595		1.01876	0.0524182		0.886398	0.0380915
	0.89884	0.0445227		1.01889	0.0524414		0.88606	0.0381216
	0.897558	0.0443073		1.0189	0.0524672		0.885642	0.0381525
	0.896263	0.0441173		1.01877	0.052495		0.885188	0.0381852
	0.894937	0.0439558		1.01858	0.0525114		0.884766	0.0382083
	0.893686	0.0438132		1.01836	0.0525231		0.884311	0.038235
	0.892463	0.0436931		1.01803	0.0525306		0.883817	0.0382627
	0.891236	0.0436		1.0176	0.0525351		0.883258	0.038294
	0.89002	0.0435379		1.01711	0.0525421		0.882647	0.0383303
	0.88882	0.0434999		1.01656	0.0525506		0.882023	0.0383737
	0.887695	0.0434842		1.01603	0.052552		0.88136	0.0384223
	0.886612	0.0434914		1.01544	0.0525583		0.88067	0.0384721
	0.88557	0.0435111		1.0148	0.0525646		0.87996	0.0385213
	0.884645	0.0435329		1.01417	0.0525551		0.879244	0.0385779
	0.883834	0.0435435		1.01344	0.0525489		0.878488	0.038641
	0.883089	0.0435571		1.01263	0.0525467		0.877661	0.0387045
	0.882343	0.0435798		1.01171	0.0525456		0.876752	0.0387668
	0.881619	0.0436077		1.01073	0.0525502		0.875785	0.0388298
	0.880994	0.0436373		1.00976	0.0525478		0.874729	0.0388926
	0.880426	0.0436712		1.00873	0.0525419		0.873595	0.0389652
	0.879915	0.0437065		1.00761	0.0525397		0.872372	0.0390445
	0.879469	0.0437369		1.00638	0.0525388		0.871015	0.039123
	0.879019	0.0437812		1.00504	0.05253		0.869549	0.0392156
	0.878568	0.0438424		1.00363	0.0525139		0.867967	0.0393163
	0.878186	0.0439156		1.00212	0.0524992		0.866281	0.0394265
	0.877864	0.0440018		1.00053	0.0524909		0.864534	0.0395466
	0.877502	0.044095		0.998795	0.0524864		0.862677	0.0396687
	0.87712	0.0441972		0.99699	0.0524703		0.860729	0.0398001
	0.876672	0.044306		0.995082	0.052451		0.858727	0.0399375
	0.876176	0.0444299		0.993086	0.0524285		0.856638	0.0400817
	0.875605	0.0445701		0.991015	0.0524043		0.854457	0.0402345
	0.874978	0.0447284		0.988932	0.0523687		0.852259	0.0403873
	0.874308	0.0449066		0.986829	0.0523323		0.850004	0.0405456
	0.87357	0.0451032		0.984688	0.0522969		0.847732	0.0407058
	0.87276	0.0453105		0.982474	0.0522654		0.845504	0.0408814
	0.871906	0.0455288		0.980202	0.0522359		0.843298	0.0410741
	0.871002	0.0457623		0.977889	0.0521987		0.841089	0.0412792
	0.87007	0.0460038		0.975555	0.0521566		0.838842	0.0414913
	0.869129	0.0462546		0.973182	0.0521028		0.836553	0.0417052
	0.868202	0.0465059		0.970818	0.0520296		0.834323	0.0419271
	0.867316	0.0467609		0.96848	0.0519489		0.83211	0.0421595
	0.866431	0.0470207		0.966168	0.0518565		0.829863	0.0424023
	0.865576	0.0472804		0.963906	0.051741		0.827639	0.0426471
	0.864767	0.047541		0.961679	0.0515979		0.825403	0.0429049
	0.863949	0.0477954		0.959529	0.0514523		0.823186	0.043173
	0.863156	0.0480387		0.957458	0.0513081		0.821029	0.0434506
	0.862414	0.048273		0.955452	0.0511723		0.818948	0.0437316
	0.861717	0.0484984		0.953503	0.0510471		0.816982	0.0440244
	0.861128	0.048702		0.951635	0.0509344		0.815113	0.044327
	0.860626	0.0488865		0.949809	0.0508298		0.813284	0.0446397
	0.860084	0.0490587		0.948039	0.0507267		0.811458	0.0449549
	0.859564	0.0492236		0.946323	0.0506209		0.809615	0.0452585
	0.859078	0.0493896		0.944571	0.0505198		0.807768	0.0455588
	0.858606	0.049561		0.942756	0.0504207		0.80594	0.0458614
	0.858112	0.0497426		0.94086	0.0503215		0.804153	0.0461518
	0.857585	0.0499311		0.938982	0.0502181		0.802363	0.046444
	0.856974	0.0501255		0.937112	0.0501061		0.800602	0.0467343
	0.85626	0.0503247		0.93523	0.0499957		0.798833	0.0470197
	0.855516	0.050525		0.933358	0.0498875		0.797026	0.0473018
	0.854756	0.0507215		0.931484	0.04977		0.795238	0.0475771
	0.853894	0.0509161		0.929578	0.0496527		0.793471	0.0478491
	0.852909	0.051112		0.927624	0.04954		0.791756	0.0481215
	0.851794	0.0513071		0.925619	0.0494332		0.790115	0.0483773
	0.850593	0.0514984		0.923604	0.0493268		0.788478	0.0486291
	0.849347	0.0516755		0.921593	0.0492318		0.786904	0.0488715
	0.847969	0.0518454		0.919618	0.0491393		0.785323	0.0491141
	0.846445	0.0520123		0.917612	0.0490528		0.783705	0.0493599
	0.844765	0.0521696		0.915631	0.0489725		0.782067	0.0496086
	0.842978	0.0523168		0.913746	0.048889		0.780426	0.0498576
	0.841075	0.0524575		0.911936	0.0488095		0.778779	0.050103
	0.839109	0.0525918		0.910148	0.0487536		0.777122	0.0503396
	0.837105	0.0527154		0.908342	0.0487178		0.77544	0.050572
	0.835046	0.0528325		0.906479	0.0487056		0.773747	0.050802
	0.832942	0.0529487		0.904532	0.0487129		0.772028	0.0510272
	0.830789	0.0530616		0.902545	0.0487245		0.770292	0.0512409
	0.828613	0.0531731		0.900437	0.0487512		0.768528	0.0514499
	0.82633	0.0532772		0.898258	0.0487899		0.766724	0.0516593
	0.823966	0.0533761		0.896038	0.0488433		0.764845	0.0518706
	0.821525	0.0534639		0.893817	0.0489155		0.762895	0.0520782
	0.819021	0.0535439		0.891624	0.0490019		0.760897	0.0522807
	0.816441	0.0536168		0.889438	0.0491014		0.75886	0.0524841
	0.813809	0.053687		0.887334	0.0491829		0.756789	0.0526811
	0.811156	0.0537545		0.885342	0.0492521		0.754701	0.05287
	0.808574	0.0538018		0.883369	0.0493235		0.752623	0.0530511
	0.805891	0.053837		0.881377	0.0494053		0.750578	0.0532231
	0.803153	0.0538528		0.879388	0.0494977		0.748568	0.0533832
	0.800362	0.0538483		0.877427	0.0495849		0.746555	0.0535355
	0.797511	0.053826		0.875545	0.0496697		0.744497	0.0536826
	0.794598	0.0537956		0.873691	0.0497464		0.742463	0.0538175
	0.791628	0.0537582		0.871878	0.0498216		0.740476	0.0539406
	0.788608	0.0537163		0.870031	0.049905		0.738467	0.0540612
	0.785505	0.053673		0.868177	0.0499972		0.736472	0.0541764
	0.78231	0.0536239		0.866379	0.0500784		0.734491	0.054286
	0.779017	0.0535709		0.864605	0.0501505		0.732502	0.0543979
	0.775587	0.0535151		0.862855	0.0502222		0.730519	0.0545097
	0.772048	0.0534594		0.861115	0.0502941		0.728542	0.0546216
	0.768459	0.0534121		0.859422	0.0503815		0.726551	0.0547391
	0.764833	0.0533717		0.857788	0.0504883		0.724619	0.0548599
	0.761231	0.0533206		0.85625	0.050597		0.722745	0.0549808
	0.757655	0.0532637		0.854752	0.0507175		0.720892	0.0551088
	0.754043	0.0532066		0.853331	0.0508546		0.719001	0.05524
	0.750461	0.0531484		0.851948	0.0510028		0.717038	0.0553733
	0.746949	0.0530882		0.850513	0.0511643		0.715009	0.0555112
	0.743494	0.0530222		0.849021	0.051332		0.712943	0.0556534
	0.740082	0.0529543		0.847499	0.0515006		0.710831	0.0557997
	0.736676	0.0528927		0.845936	0.0516758		0.708712	0.0559488
	0.733199	0.0528426		0.844304	0.0518559		0.706613	0.056094
	0.729672	0.0527976		0.842623	0.0520411		0.704475	0.056237
	0.726202	0.0527579		0.840889	0.0522314		0.702324	0.0563693
	0.722815	0.0527213		0.839148	0.0524219		0.700172	0.0564877
	0.719455	0.0526935		0.837348	0.0526194		0.698059	0.056592
	0.716091	0.0526755		0.835455	0.0528261		0.695968	0.0566899
	0.712695	0.0526696		0.833452	0.0530401		0.693939	0.0567765
	0.70929	0.0526786		0.831365	0.053264		0.6919	0.0568567
	0.705888	0.0527001		0.829191	0.0534898		0.689925	0.0569281
	0.702497	0.0527318		0.826912	0.0537099		0.687975	0.0569908
	0.699099	0.0527733		0.824546	0.0539236		0.686033	0.057049
	0.695678	0.0528221		0.822107	0.0541355		0.684061	0.0571083
	0.692223	0.052878		0.819687	0.0543291		0.68205	0.0571651
	0.688716	0.0529331		0.817286	0.0545091		0.679974	0.0572213
	0.685161	0.0529812		0.814798	0.054695		0.677824	0.0572752
	0.681556	0.0530196		0.812214	0.0548803		0.675634	0.0573274
	0.677916	0.0530505		0.8095	0.055068		0.673431	0.0573723
	0.674238	0.0530745		0.806643	0.0552569		0.671222	0.0574065
	0.670552	0.0530902		0.803695	0.0554403		0.669032	0.0574249
	0.666914	0.0530941		0.800638	0.055625		0.666825	0.0574372
	0.663266	0.0530915		0.797517	0.0558066		0.664572	0.0574511
	0.659627	0.0530857		0.794299	0.0559849		0.662258	0.0574703
	0.655993	0.0530818		0.791012	0.056164		0.659875	0.0574883
	0.652394	0.0530821		0.787729	0.0563466		0.657433	0.0575009
	0.648857	0.0530861		0.784418	0.0565414		0.654945	0.0575172
	0.645373	0.0531003		0.78115	0.0567322		0.652423	0.0575278
	0.641959	0.0531238		0.777948	0.0569217		0.649864	0.0575337
	0.638745	0.0531418		0.77472	0.0571056		0.647248	0.057538
	0.635548	0.0531714		0.77141	0.0572887		0.644561	0.0575393
	0.632397	0.0532061		0.768052	0.0574681		0.641825	0.0575287
	0.629267	0.0532408		0.764635	0.0576388		0.639056	0.0575019
	0.626166	0.0532756		0.761197	0.0577959		0.636193	0.0574683
	0.62312	0.0533123		0.757707	0.0579439		0.633281	0.0574219
	0.620104	0.0533562		0.754216	0.0580945		0.630336	0.0573548
	0.617124	0.0534048		0.750741	0.058244		0.627335	0.0572779
	0.61418	0.0534599		0.747292	0.0583968		0.624313	0.0571874
	0.611269	0.0535197		0.743858	0.0585506		0.621274	0.0570929
	0.608367	0.0535858		0.740471	0.0586959		0.618212	0.0570042
	0.60544	0.0536553		0.737099	0.0588382		0.615156	0.0569136
	0.602521	0.053722		0.733724	0.0589721		0.612085	0.0568253
	0.599627	0.0537886		0.730359	0.0591046		0.608999	0.0567402
	0.596741	0.0538554		0.726995	0.0592378		0.6059	0.0566561
	0.593848	0.0539204		0.723688	0.0593515		0.60279	0.0565679
	0.590927	0.0539819		0.720409	0.0594485		0.599656	0.0564779
	0.58803	0.0540307		0.71722	0.0595393		0.596481	0.0563812
	0.585196	0.0540589		0.714117	0.059623		0.593261	0.0562776
	0.582417	0.0540714		0.711055	0.0597043		0.589998	0.0561646
	0.57975	0.0540645		0.707999	0.0597819		0.586707	0.0560372
	0.577177	0.0540354		0.704992	0.0598461		0.583347	0.0559076
	0.574615	0.0539917		0.701965	0.059909		0.579968	0.0557735
	0.572049	0.0539372		0.698874	0.0599754		0.576567	0.0556348
	0.569463	0.0538734		0.695754	0.0600458		0.57311	0.055499
	0.566866	0.0538028		0.692619	0.0601223		0.569626	0.055361
	0.564298	0.0537242		0.689524	0.0602063		0.566128	0.0552188
	0.561721	0.0536422		0.686451	0.0602938		0.562666	0.0550665
	0.559141	0.0535574		0.683395	0.0603842		0.559227	0.0549082
	0.556556	0.0534683		0.680299	0.0604773		0.555824	0.0547509
	0.55395	0.0533762		0.677129	0.0605662		0.552429	0.0545917
	0.551304	0.053281		0.673908	0.0606478		0.549074	0.054431
	0.548608	0.0531864		0.670613	0.0607165		0.545781	0.0542626
	0.545904	0.0531007		0.667279	0.0607662		0.542545	0.0540898
	0.543165	0.0530176		0.663889	0.0607995		0.539343	0.0539152
	0.540373	0.0529375		0.660474	0.0608155		0.536179	0.0537353
	0.537575	0.0528451		0.657087	0.0608213		0.53306	0.0535568
	0.534774	0.0527336		0.653751	0.0608199		0.52998	0.0533808
	0.53196	0.0525951		0.650477	0.0608072		0.526937	0.0532093
	0.529099	0.0524351		0.647172	0.060783		0.523913	0.05304
	0.526177	0.0522536		0.64379	0.0607504		0.520921	0.0528679
	0.523224	0.0520457		0.640354	0.0607107		0.517942	0.0526923
	0.520291	0.0518242		0.636844	0.0606644		0.514975	0.0525141
	0.517267	0.0515865		0.633236	0.0606067		0.511997	0.0523397
	0.514162	0.0513319		0.629527	0.0605314		0.509034	0.0521724
	0.510977	0.051063		0.62573	0.0604347		0.506074	0.0520104
	0.507721	0.0507842		0.621854	0.0603257		0.503134	0.0518468
	0.504442	0.0504965		0.617884	0.0602135		0.500226	0.051687
	0.501169	0.0502081		0.613846	0.0600949		0.497353	0.0515278
	0.497914	0.0499183		0.609783	0.0599665		0.494503	0.0513718
	0.494679	0.0496328		0.605715	0.0598357		0.491656	0.0512157
	0.491477	0.0493596		0.601662	0.0597065		0.488817	0.0510595
	0.488339	0.0490902		0.597618	0.0595765		0.485972	0.0509007
	0.485272	0.0488257		0.593592	0.059445		0.483137	0.0507273
	0.482306	0.0485634		0.589637	0.0593127		0.480263	0.0505426
	0.479463	0.0483022		0.58572	0.0591807		0.477367	0.0503531
	0.47666	0.0480469		0.581849	0.059048		0.474442	0.0501549
	0.473899	0.0478006		0.578016	0.0589126		0.471494	0.0499537
	0.471176	0.0475532		0.574201	0.0587757		0.468555	0.0497478
	0.468474	0.0473091		0.570407	0.0586341		0.465657	0.049543
	0.465766	0.0470697		0.56665	0.058492		0.462775	0.0493456
	0.463068	0.0468339		0.562919	0.0583438		0.459949	0.0491526
	0.460382	0.0466062		0.559192	0.0581849		0.457183	0.0489715
	0.457731	0.046389		0.555492	0.0580093		0.454446	0.0488044
	0.455127	0.0461748		0.551811	0.057817		0.451764	0.0486483
	0.45253	0.0459655		0.548109	0.0576028		0.449169	0.0485052
	0.449937	0.0457651		0.544341	0.0573742		0.446663	0.0483756
	0.44738	0.0455692		0.540517	0.0571334		0.44423	0.0482484
	0.444908	0.0453798		0.536679	0.0568816		0.44187	0.0481203
	0.442477	0.0451974		0.532861	0.0566244		0.439555	0.04799
	0.440082	0.0450222		0.529015	0.0563613		0.437303	0.0478524
	0.437751	0.044858		0.525189	0.0560939		0.435054	0.0477152
	0.435455	0.0447042		0.521394	0.0558268		0.432821	0.0475805
	0.433227	0.0445658		0.517604	0.0555622		0.430634	0.0474489
	0.431069	0.0444422		0.513857	0.0553042		0.428468	0.0473246
	0.428963	0.0443306		0.510153	0.055053		0.42629	0.0472109
	0.426917	0.0442297		0.506511	0.0548116		0.424143	0.0471105
	0.424915	0.0441395		0.502948	0.0545808		0.422024	0.0470229
	0.422952	0.0440608		0.499493	0.0543573		0.419934	0.0469487
	0.421006	0.0439892		0.496164	0.0541468		0.417854	0.0468887
	0.419093	0.0439263		0.492854	0.0539404		0.415759	0.0468385
	0.417239	0.043871		0.489555	0.0537397		0.413646	0.0467965
	0.415377	0.0438253		0.486287	0.0535417		0.411547	0.0467572
	0.413532	0.043798		0.483063	0.0533459		0.409467	0.0467217
	0.411701	0.0437842		0.479852	0.0531507		0.407405	0.0466929
	0.409871	0.0437835		0.476641	0.0529518		0.405403	0.0466711
	0.408047	0.043784		0.473494	0.0527553		0.403488	0.0466585
	0.406255	0.0437814		0.47045	0.0525537		0.401641	0.0466538
	0.404506	0.0437849		0.467558	0.0523517		0.399857	0.0466582
	0.402835	0.0438079		0.464776	0.052158		0.398144	0.0466705
	0.401171	0.0438349		0.462061	0.0519718		0.396464	0.0466854
	0.399517	0.0438608		0.459415	0.0517959		0.394786	0.0466999
	0.397898	0.0438926		0.456801	0.051626		0.393096	0.0467134
	0.396289	0.0439261		0.454233	0.0514632		0.391413	0.0467284
	0.394699	0.0439612		0.451706	0.0513066		0.389761	0.0467468
	0.393126	0.0439957		0.449217	0.0511527		0.38814	0.0467688
	0.391568	0.0440278		0.446762	0.0510059		0.386547	0.0467909
	0.389998	0.0440571		0.444345	0.0508644		0.385	0.0468146
	0.388449	0.0440875		0.441972	0.0507297		0.383479	0.0468363
	0.3869	0.0441117		0.439659	0.0506033		0.382001	0.046862
	0.385382	0.0441307		0.437413	0.0504873		0.380508	0.0468839
	0.383952	0.0441652		0.435334	0.0503905		0.379043	0.0469021
	0.382621	0.0442039		0.433354	0.0503		0.377593	0.0469171
	0.381363	0.0442477		0.431465	0.0502027		0.376108	0.0469223
	0.380152	0.0442965		0.429665	0.0501179		0.37458	0.0469176
	0.379013	0.0443523		0.42796	0.0500404		0.373045	0.0469089
	0.377917	0.0444052		0.426326	0.049965		0.371491	0.0468913
	0.376846	0.0444523		0.424788	0.0498874		0.369926	0.0468672
	0.375825	0.0444949		0.423341	0.0498174		0.368386	0.0468379
	0.374867	0.0445401		0.421961	0.0497507		0.366865	0.0468032
	0.37394	0.0445767		0.420647	0.0496833		0.365402	0.0467579
	0.373081	0.0446125		0.419365	0.049612		0.364036	0.0467061
	0.37231	0.0446453		0.418142	0.0495372		0.362689	0.0466486
	0.371575	0.0446764		0.416991	0.049461		0.361322	0.0465837
	0.37087	0.0447		0.415895	0.0493769		0.359982	0.0465126
	0.370204	0.04472		0.414863	0.049282		0.358739	0.046444
	0.369556	0.0447354		0.413818	0.0491744		0.35759	0.0463792
	0.368933	0.0447378		0.412776	0.0490574		0.356492	0.046309
	0.368373	0.0447293		0.411771	0.0489363		0.35545	0.0462356
	0.367827	0.0447089		0.410783	0.0488091		0.354449	0.0461623
	0.367341	0.0446852		0.409792	0.0486786		0.353534	0.04609
	0.366925	0.0446627		0.408809	0.0485481		0.352686	0.0460168
	0.366587	0.0446425		0.407838	0.0484173		0.351956	0.045944
	0.366292	0.044615		0.406929	0.0482876		0.351312	0.0458646
	0.366104	0.0445831		0.406129	0.0481649		0.350735	0.0457821
	0.365993	0.0445429		0.40542	0.0480351		0.350185	0.0456967
	0.365946	0.0444977		0.404764	0.0479033		0.349682	0.0456105
	0.365938	0.0444447		0.404155	0.0477682		0.349245	0.0455259
	0.365948	0.0443837		0.40364	0.0476298		0.348883	0.0454433
	0.36599	0.0443108		0.403246	0.0474962		0.348585	0.045364
	0.366132	0.0442391		0.402917	0.0473618		0.348347	0.0452871
	0.366449	0.0441694		0.402664	0.0472258		0.348165	0.0452118
	0.366878	0.0441086		0.402554	0.0470887		0.348113	0.0451483
	0.367435	0.0440622		0.402589	0.0469669		0.348138	0.0450872
	0.368179	0.0440284		0.402756	0.0468599		0.34822	0.0450289
	0.369051	0.0440069		0.403003	0.0467503		0.348373	0.0449698
	0.370021	0.0439847		0.403339	0.0466328		0.348633	0.0449136
	0.371053	0.0439537		0.403766	0.0465107		0.348942	0.0448503
	0.372109	0.0439102		0.404253	0.0463847		0.349384	0.0447932
	0.373268	0.0438706		0.404832	0.0462641		0.349964	0.04474
	0.374494	0.0438279		0.405466	0.0461473		0.350621	0.044684
	0.375793	0.0437851		0.406212	0.046038		0.351349	0.044624
	0.377155	0.0437418		0.406994	0.0459221		0.352185	0.0445662
	0.378606	0.0437036		0.40785	0.0458124		0.353144	0.0445129
	0.380192	0.0436696		0.408812	0.045712		0.354197	0.0444607
	0.381935	0.0436418		0.409946	0.045621		0.355362	0.0444113
	0.383837	0.0436256		0.411214	0.045538		0.356617	0.044361
	0.385854	0.043619		0.412642	0.0454648		0.35799	0.0443143
	0.388027	0.043629		0.4142	0.0454112		0.359504	0.0442738
	0.390357	0.0436564		0.415864	0.0453678		0.361188	0.0442492
	0.392798	0.0436858		0.417645	0.0453349		0.363039	0.0442355
	0.395396	0.0437202		0.419604	0.0453176		0.365106	0.0442434
	0.398151	0.0437537		0.421717	0.0453092		0.367363	0.0442706
	0.401111	0.0437924		0.423967	0.0453054		0.369751	0.0443144
	0.404211	0.0438328		0.426351	0.0453047		0.372294	0.0443762
	0.407503	0.0438798		0.428853	0.0453132		0.374972	0.0444532
	0.410992	0.0439374		0.431515	0.04534		0.377803	0.0445473
	0.414672	0.0440037		0.434357	0.0453855		0.380776	0.0446571
	0.418523	0.0440858		0.437333	0.0454508		0.38397	0.0447987
	0.422559	0.0441909		0.440494	0.0455469		0.387317	0.0449638
	0.426759	0.0443044		0.443821	0.0456593		0.390869	0.0451599
	0.431124	0.0444309		0.447222	0.0457744		0.39459	0.0453711
	0.43563	0.0445718		0.450761	0.0458984		0.39843	0.0455964
	0.440313	0.0447492		0.454438	0.0460342		0.40243	0.0458453
	0.445101	0.0449446		0.458231	0.0461777		0.406543	0.0461039
	0.450041	0.0451664		0.462171	0.0463365		0.41078	0.0463758
	0.455086	0.0454088		0.466194	0.0465052		0.415154	0.0466608
	0.460259	0.0456775		0.470276	0.0466873		0.419656	0.0469627
	0.465588	0.045991		0.474435	0.0468752		0.424269	0.047282
	0.470998	0.0463257		0.478652	0.0470692		0.429001	0.0476169
	0.476484	0.0466826		0.482993	0.0472813		0.433913	0.0479816
	0.482013	0.0470565		0.487525	0.0475167		0.438978	0.0483728
	0.487593	0.0474499		0.492218	0.0477735		0.444232	0.0487946
	0.493197	0.0478554		0.49708	0.0480518		0.449685	0.0492504
	0.498977	0.0482946		0.502185	0.0483649		0.45528	0.0497271
	0.504887	0.0487586		0.507433	0.0486948		0.461057	0.0502281
	0.510867	0.0492431		0.512771	0.0490349		0.466999	0.0507628
	0.516886	0.0497462		0.518205	0.0493948		0.473128	0.0513353
	0.522961	0.0502624		0.5238	0.0497869		0.479485	0.0519505
	0.52907	0.0507819		0.529562	0.0502082		0.486014	0.0525951
	0.535264	0.0513163		0.535469	0.0506704		0.492746	0.0532668
	0.541539	0.0518632		0.541512	0.0511655		0.4997	0.0539771
	0.547871	0.0524236		0.547779	0.0517031		0.50687	0.054733
	0.55427	0.0529986		0.554257	0.0522854		0.514192	0.0555129
	0.560777	0.0535869		0.560935	0.0529118		0.521572	0.056298
	0.567356	0.0541855		0.567667	0.0535487		0.529039	0.0570858
	0.573986	0.054784		0.574484	0.0541996		0.536581	0.0578726
	0.580621	0.0553754		0.581338	0.0548461		0.544218	0.0586582
	0.587249	0.0559533		0.588145	0.0554646		0.552088	0.0594725
	0.593878	0.0565216		0.594946	0.0560629		0.560119	0.0603113
	0.600521	0.0570857		0.601762	0.0566456		0.568223	0.0611641
	0.607147	0.0576405		0.608632	0.0572188		0.576365	0.0620305
	0.613751	0.0581756		0.61554	0.0577808		0.584505	0.062898
	0.620339	0.0586923		0.622507	0.0583416		0.592579	0.0637528
	0.626906	0.0591968		0.629506	0.0588998		0.60054	0.0645801
	0.633434	0.0597027		0.636639	0.059479		0.608372	0.0653681
	0.639904	0.0602081		0.643861	0.0600691		0.616106	0.0661178
	0.646306	0.0607076		0.651236	0.0606867		0.62371	0.0668295
	0.652667	0.0612069		0.658712	0.0613175		0.631204	0.0675106
	0.659015	0.061711		0.666199	0.0619393		0.638605	0.0681599
	0.665221	0.0621855		0.673669	0.0625448		0.645934	0.0687778
	0.671307	0.0626389		0.681163	0.0631313		0.653201	0.0693656
	0.677231	0.0630565		0.688627	0.0636966		0.660357	0.0699209
	0.683068	0.0634512		0.696022	0.0642266		0.667396	0.0704533
	0.688822	0.0638266		0.703391	0.0647457		0.674306	0.0709634
	0.694519	0.0641793		0.710615	0.0652295		0.68109	0.071436
	0.700292	0.0645227		0.717817	0.0657085		0.687753	0.0718815
	0.706058	0.0648374		0.72497	0.0661799		0.694289	0.0722942
	0.711776	0.0651207		0.732066	0.0666405		0.700711	0.0726821
	0.71746	0.0653724		0.739062	0.0670831		0.706981	0.0730451
	0.723083	0.065588		0.745988	0.0675031		0.71317	0.0734025
	0.728585	0.0657596		0.752776	0.0678839		0.719131	0.0737147
	0.733951	0.0658795		0.759452	0.0682358		0.724906	0.0739909
	0.739257	0.0659693		0.766003	0.0685594		0.730557	0.074242
	0.744392	0.0660229		0.772436	0.0688614		0.735998	0.0744535
	0.749457	0.0660491		0.778738	0.069129		0.741263	0.0746297
	0.754463	0.0660514		0.784957	0.0693579		0.746335	0.0747703
	0.759401	0.0660362		0.79106	0.06956		0.751211	0.0748777
	0.764348	0.066014		0.79694	0.0697204		0.755844	0.0749402
	0.769183	0.0659718		0.802629	0.0698618		0.760231	0.0749583
	0.773906	0.065913		0.808166	0.0699892		0.764396	0.074931
	0.77846	0.0658182		0.813602	0.0701048		0.768301	0.0748587
	0.782831	0.0656864		0.818973	0.070212		0.771926	0.0747382
	0.787069	0.0655249		0.824229	0.0703104		0.775361	0.074588
	0.79131	0.0653453		0.829412	0.0703987		0.778637	0.0744203
	0.79546	0.0651489		0.834481	0.0704746		0.781801	0.0742423
	0.799482	0.0649326		0.839404	0.0705248		0.784894	0.0740602
	0.803407	0.064695		0.844251	0.0705603		0.787917	0.0738722
	0.807311	0.0644478		0.849029	0.0705923		0.790866	0.0736815
	0.811164	0.0641855		0.853729	0.0706271		0.793719	0.0734826
	0.814959	0.0639097		0.858294	0.070655		0.796549	0.0732742
	0.818714	0.0636282		0.862718	0.0706752		0.799417	0.0730698
	0.82243	0.0633411		0.867059	0.0706897		0.802268	0.0728719
	0.826134	0.0630469		0.871226	0.0706763		0.805088	0.0726704
	0.829813	0.0627524		0.875223	0.0706441		0.807757	0.0724475
	0.833505	0.0624649		0.878984	0.0705785		0.810306	0.0722099
	0.837136	0.0621732		0.882534	0.0704805		0.812709	0.0719537
	0.840662	0.0618624		0.885869	0.0703488		0.815097	0.0716936
	0.844075	0.0615381		0.888938	0.0701749		0.817616	0.0714334
	0.847436	0.0612075		0.891743	0.0699611		0.820249	0.0711702
	0.850721	0.0608729		0.894334	0.0697164		0.822931	0.070905
	0.853898	0.0605212		0.896778	0.0694588		0.825636	0.0706416
	0.857044	0.0601624		0.89909	0.0691812		0.828328	0.0703762
	0.860094	0.0597934		0.90136	0.068898		0.830911	0.0701042
	0.863102	0.0594185		0.903487	0.0686024		0.833358	0.0698221
	0.866026	0.059044		0.905526	0.0683007		0.835682	0.0695204
	0.868935	0.0586905		0.907522	0.0679971		0.838017	0.0692058
	0.871788	0.0583542		0.909589	0.0676973		0.840347	0.0688858
	0.874553	0.0580304		0.911777	0.0674002		0.84267	0.0685773
	0.877309	0.0577298		0.914042	0.0670991		0.845007	0.0682744
	0.879977	0.057432		0.916344	0.0667907		0.847355	0.0679823
	0.882624	0.0571458		0.918718	0.0664724		0.849668	0.0676966
	0.885221	0.0568679		0.921178	0.0661386		0.851904	0.0674068
	0.887717	0.0565907		0.923742	0.0657921		0.854132	0.0671233
	0.890129	0.0563203		0.926415	0.0654496		0.856371	0.0668502
	0.892443	0.0560566		0.929029	0.0650955		0.858568	0.0665751
	0.894791	0.0558296		0.93165	0.0647386		0.860677	0.0662943
	0.897087	0.0556198		0.934241	0.0643712		0.86273	0.066006
	0.899334	0.0554211		0.936784	0.0639869		0.864759	0.0657189
	0.90156	0.0552311		0.939281	0.0635882		0.866813	0.0654403
	0.903709	0.0550486		0.941772	0.0631736		0.868913	0.0651868
	0.905764	0.0548713		0.944267	0.0627494		0.87102	0.0649363
	0.907719	0.0546935		0.946859	0.0623202		0.873125	0.0646876
	0.909541	0.0545121		0.949555	0.0618921		0.875229	0.0644344
	0.911178	0.0543195		0.95237	0.061468		0.877366	0.0641785
	0.912696	0.0541115		0.95521	0.0610413		0.879599	0.0639254
	0.91416	0.0538979		0.958051	0.0606118		0.881882	0.0636753
	0.915572	0.0536749		0.960903	0.0601793		0.884177	0.0634149
	0.916993	0.0534534		0.963827	0.0597583		0.886525	0.0631374
	0.918351	0.0532237		0.966842	0.0593484		0.888865	0.0628504
	0.919695	0.0529972		0.969894	0.0589486		0.891161	0.0625548
	0.920988	0.0527626		0.973011	0.0585491		0.89337	0.0622462
	0.922211	0.0525245		0.976246	0.0581554		0.895493	0.0619299
	0.923355	0.052286		0.979639	0.0577672		0.897577	0.0616123
	0.924456	0.0520421		0.983203	0.057382		0.899693	0.0613047
	0.925505	0.0517843		0.986955	0.0570155		0.90184	0.0610093
	0.926496	0.0515138		0.990818	0.0566528		0.904081	0.0607276
	0.927474	0.0512338		0.994917	0.0563066		0.90638	0.0604514
	0.928491	0.0509477		0.99924	0.0559766		0.908748	0.0601812
	0.929552	0.050654		1.00379	0.0556709		0.911219	0.059915
	0.930631	0.05035		1.00842	0.0553858		0.913812	0.0596491
	0.931697	0.0500367		1.0131	0.0551191		0.916477	0.0593881
	0.932874	0.0497328		1.01787	0.0548779		0.919156	0.0591306
	0.934167	0.0494373		1.02258	0.0546407		0.921855	0.05887
	0.935532	0.0491534		1.02721	0.0544034		0.924551	0.0586052
	0.937039	0.0488845		1.03183	0.0541683		0.927179	0.0583301
	0.938544	0.04861		1.0364	0.053927		0.929757	0.0580423
	0.939954	0.0483239		1.04091	0.053684		0.932322	0.0577547
	0.941307	0.0480341		1.04535	0.0534418		0.934945	0.057469
	0.942667	0.0477384		1.04967	0.0531962		0.9376	0.0571781
	0.944031	0.0474423		1.05393	0.0529526		0.940234	0.056882
	0.945396	0.0471447		1.05808	0.0526981		0.942879	0.0565813
	0.946789	0.0468459		1.06211	0.0524335		0.945551	0.0562785
	0.948161	0.046548		1.06609	0.0521669		0.948201	0.0559704
	0.949507	0.0462462		1.06998	0.0518988		0.950838	0.0556567
	0.950835	0.0459433		1.07382	0.0516401		0.953436	0.0553346
	0.952247	0.0456518		1.07756	0.0513839		0.956139	0.0550234
	0.95369	0.0453747		1.08134	0.0511373		0.958939	0.0547207
	0.95511	0.0451084		1.08519	0.0509		0.961767	0.0544302
	0.956516	0.0448414		1.08903	0.0506641		0.964637	0.0541541
	0.957901	0.0445763		1.09288	0.0504376		0.967576	0.0538918
	0.959328	0.0443188		1.09667	0.0502084		0.970542	0.0536392
	0.960877	0.0440711		1.10039	0.0499773		0.973555	0.0533873
	0.962532	0.0438242		1.10406	0.0497461		0.976669	0.0531381
	0.964286	0.0435672		1.10767	0.0495103		0.979884	0.0528961
	0.966168	0.0433025		1.11118	0.0492666		0.983071	0.0526494
	0.968177	0.0430507		1.11466	0.049033		0.986201	0.0523958
	0.970282	0.0428105		1.11795	0.0487871		0.989263	0.0521326
	0.972448	0.0425812		1.12108	0.048524		0.992361	0.0518777
	0.974633	0.0423632		1.12412	0.0482597		0.995502	0.0516276
	0.976804	0.0421513		1.12703	0.047981		0.998592	0.0513825
	0.978998	0.041944		1.12982	0.047696		1.00169	0.0511427
	0.981204	0.0417391		1.13254	0.0474059		1.00471	0.0508974
	0.983411	0.041539		1.13517	0.0471099		1.00764	0.0506441
	0.985558	0.0413524		1.13767	0.0468184		1.01052	0.0503878
	0.987585	0.0411771		1.14	0.0465277		1.01339	0.0501281
	0.989558	0.0410316		1.14211	0.0462341		1.01622	0.0498703
	0.991508	0.040917		1.14399	0.0459406		1.01899	0.0496082
	0.99346	0.0408372		1.14576	0.0456572		1.02177	0.04934
	0.995368	0.0407873		1.14737	0.0453828		1.02453	0.0490704
	0.997241	0.0407661		1.14888	0.0451125		1.02732	0.0487986
	0.99912	0.0407725		1.15031	0.0448536		1.02998	0.0485212
	1.00099	0.040801		1.15171	0.0446111		1.03254	0.0482478
	1.00286	0.0408493		1.15296	0.0443802		1.03502	0.0479795
	1.0047	0.0409098		1.15414	0.0441667		1.03746	0.0477199
	1.00647	0.0409814		1.15522	0.0439589		1.03996	0.0474732
	1.00821	0.0410639		1.15615	0.0437609		1.04253	0.0472392
	1.00986	0.0411501		1.15713	0.0435817		1.04513	0.0470161
	1.01149	0.0412436		1.15817	0.0434207		1.0478	0.0468057
	1.01311	0.0413453		1.15928	0.0432804		1.05054	0.0466079
	1.01467	0.0414552		1.16052	0.043163		1.05328	0.0464202
	1.01616	0.0415709		1.16181	0.0430718		1.05594	0.046234
	1.01762	0.0417026		1.1631	0.0430039		1.05851	0.0460467
	1.019	0.0418518		1.16432	0.0429651		1.06101	0.0458555
	1.02036	0.0420177		1.16544	0.0429517		1.06346	0.0456641
	1.02166	0.0422054		1.16646	0.0429604		1.06585	0.0454777
	1.02288	0.0424108		1.16741	0.0429998		1.06821	0.0452993
	1.02396	0.0426275		1.16836	0.0430688		1.07049	0.0451342
	1.02492	0.0428615		1.16927	0.0431543		1.07271	0.044982
	1.0258	0.0431108		1.17012	0.0432625		1.07496	0.0448436
	1.02663	0.0433694		1.17096	0.0433891		1.07717	0.0447199
	1.02742	0.0436386		1.17184	0.0435362		1.07934	0.0446051
	1.0282	0.0439169		1.17277	0.0437059		1.08141	0.0444957
	1.02898	0.0442033		1.17371	0.0438892		1.0834	0.044386
	1.02971	0.0444927		1.1747	0.0440728		1.08534	0.0442749
	1.0304	0.0447853		1.17573	0.0442439		1.08721	0.0441611
	1.03101	0.0450911		1.17679	0.0444094		1.08903	0.0440507
	1.03156	0.0454048		1.17792	0.0445621		1.09074	0.0439563
	1.0321	0.0457205		1.17911	0.0447049		1.09233	0.0438782
	1.03267	0.0460309		1.18024	0.0448448		1.09383	0.0438183
	1.03333	0.0463367		1.18136	0.0449842		1.09519	0.0437684
	1.03408	0.0466353		1.18255	0.0451255		1.09643	0.0437298
	1.03493	0.0469298		1.18378	0.0452632		1.09765	0.0437143
	1.03582	0.0472231		1.18504	0.0453972		1.09883	0.0437212
	1.03675	0.0475088		1.1864	0.0455277		1.09998	0.0437425
	1.03779	0.0477862		1.18785	0.0456523		1.10108	0.0437754
	1.03889	0.0480575		1.1894	0.0457751		1.10219	0.0438322
	1.03999	0.0483173		1.19093	0.0458985		1.10326	0.0439041
	1.04114	0.0485636		1.19247	0.0460213		1.10426	0.0439951
	1.04227	0.0487986		1.19409	0.0461429		1.10528	0.0441123
	1.04341	0.0490173		1.19574	0.0462568		1.10623	0.0442439
	1.04458	0.0492192		1.19745	0.0463575		1.10715	0.0443862
	1.04576	0.0494012		1.19917	0.0464445		1.10796	0.044538
	1.04696	0.0495664		1.20088	0.0465265		1.10866	0.0447041
	1.04825	0.0497176		1.20258	0.0466057		1.10922	0.0448727
	1.0496	0.0498567		1.20419	0.0466948		1.10964	0.0450326
	1.05103	0.0499853		1.20564	0.046799		1.10994	0.0451865
	1.05257	0.0501008		1.207	0.0469119		1.11015	0.0453346
	1.05416	0.0502045		1.20829	0.0470367		1.11021	0.0454669
	1.05585	0.0503017		1.20954	0.0471672		1.11018	0.0455949
	1.05759	0.0503889		1.21076	0.047304		1.11018	0.0457124
	1.05943	0.0504653		1.21196	0.0474508		1.11009	0.0458123
	1.06131	0.0505299		1.21313	0.0476044		1.10991	0.0459039
	1.06325	0.0505843		1.21431	0.0477653		1.10964	0.0459937
	1.06523	0.0506259		1.21554	0.0479256		1.10932	0.0460798
	1.06717	0.0506558		1.21664	0.0480942		1.10905	0.0461619
	1.06909	0.0506757		1.21754	0.0482744		1.10881	0.0462455
	1.07092	0.0506841		1.21838	0.0484574		1.10857	0.0463266
	1.07275	0.0506813		1.21912	0.0486453		1.10837	0.0464125
	1.07455	0.0506686		1.21981	0.048837		1.10813	0.0464961
	1.07626	0.0506464		1.22055	0.04903		1.10779	0.0465757
	1.07788	0.0506154		1.2213	0.0492226		1.1074	0.0466535
	1.07938	0.0505774		1.22207	0.0494139		1.10694	0.0467232
	1.08079	0.0505287		1.22289	0.0495986		1.10642	0.0467822
	1.08208	0.0504728		1.22375	0.0497749		1.10583	0.0468411
	1.08334	0.0504079		1.22458	0.0499471		1.10523	0.046907
	1.08449	0.0503345		1.22541	0.0501282		1.1046	0.0469791
	1.08548	0.0502532		1.22631	0.0503187		1.10394	0.0470505
	1.08635	0.0501651		1.22721	0.0505243		1.10329	0.0471258
	1.0871	0.0500722		1.22811	0.050741		1.1028	0.0472144
	1.08781	0.0499698		1.22908	0.0509604		1.10251	0.0473087
	1.08848	0.0498615		1.23011	0.0511761		1.10231	0.0474096
	1.08909	0.0497469		1.2313	0.0513825		1.10216	0.047514
	1.08962	0.0496271		1.23258	0.0515838		1.10205	0.0476207
	1.09007	0.0495077		1.23388	0.0517793		1.10205	0.0477307
	1.09036	0.0493859		1.23517	0.0519731		1.10215	0.0478447
	1.09044	0.0492617		1.23656	0.0521594		1.10232	0.0479616
	1.09033	0.049135		1.23805	0.0523371		1.10251	0.0480817
	1.09011	0.049008		1.23957	0.0525107		1.10279	0.0481999
	1.0898	0.0488799		1.2411	0.0526839		1.10318	0.0483149
	1.08944	0.0487511		1.24267	0.0528577		1.10355	0.0484282
	1.08903	0.0486188		1.24431	0.0530324		1.10392	0.0485366
	1.08856	0.0484906		1.24596	0.0532078		1.10436	0.0486404
	1.088	0.0483647		1.24764	0.0533785		1.10484	0.0487455
	1.08746	0.0482362		1.24933	0.0535464		1.10539	0.0488526
	1.08676	0.0481114		1.25097	0.0537111		1.10598	0.0489613
	1.08595	0.0479881		1.25251	0.0538802		1.10669	0.0490615
	1.08503	0.0478633		1.25389	0.0540467		1.10747	0.049153
	1.08404	0.0477315		1.25526	0.0542085		1.10827	0.0492379
	1.08296	0.0475973		1.25663	0.0543635		1.10919	0.0493025
	1.08183	0.0474615		1.25796	0.0545068		1.11011	0.0493575
	1.08063	0.0473195		1.25925	0.054632		1.11106	0.0493987
	1.07941	0.047169		1.26046	0.054742		1.11198	0.0494195
	1.07818	0.0470158		1.26158	0.0548424		1.11285	0.0494272
	1.07693	0.046864		1.26264	0.0549309		1.11366	0.0494247
	1.07572	0.0467151		1.26365	0.0550144		1.11448	0.0494067
	1.07458	0.0465667		1.26457	0.0550947		1.11544	0.0493567
	1.07353	0.0464156		1.26536	0.0551669		1.11639	0.0492846
	1.07259	0.0462564		1.26609	0.0552319		1.11727	0.0491995
	1.07176	0.0460909		1.2668	0.0552836		1.11808	0.0490979
	1.07094	0.0459351		1.26748	0.0553297		1.11883	0.0489817
	1.07021	0.0457817		1.26816	0.0553764		1.11954	0.0488462
	1.06947	0.0456375		1.26871	0.0554244		1.12014	0.0486878
	1.06874	0.0455076		1.26918	0.0554738		1.1207	0.0485024
	1.06802	0.045382		1.2696	0.0555246		1.12124	0.0482891
	1.06728	0.0452631		1.26984	0.0555792		1.12172	0.0480543
	1.06643	0.0451615		1.26995	0.0556344		1.12211	0.0478076
	1.0655	0.045077		1.26999	0.0556845		1.12236	0.0475519
	1.0646	0.044998		1.26988	0.0557348		1.12255	0.0472849
	1.06367	0.0449267		1.26962	0.0557778		1.12267	0.0470069
	1.06267	0.0448681		1.2693	0.0558123		1.1226	0.0467224
	1.06159	0.0448173		1.26888	0.055842		1.12245	0.0464246
	1.06044	0.0447732		1.26835	0.0558622		1.12217	0.0461196
	1.05934	0.0447219		1.26776	0.0558626		1.12182	0.0458016
	1.05822	0.0446746		1.2671	0.0558456		1.12138	0.0454784
	1.05721	0.0446097		1.2663	0.0558221		1.12085	0.0451471
	1.05632	0.0445235		1.26542	0.0557837		1.12022	0.0448124
	1.0555	0.0444277		1.26447	0.0557386		1.1195	0.0444767
	1.05472	0.0443272		1.26342	0.055686		1.11879	0.0441251
	1.05391	0.0442255		1.26227	0.0556271		1.11808	0.04377
	1.05318	0.0441069		1.26104	0.0555597		1.11743	0.0434017
	1.05247	0.0439754		1.25972	0.0554875		1.11674	0.0430312
	1.05181	0.0438259		1.25842	0.0554086		1.11607	0.0426602
	1.0512	0.0436588		1.25711	0.0553006		1.11546	0.042284
	1.05066	0.0434779		1.25577	0.055174		1.1149	0.0419092
	1.05019	0.0432929		1.25445	0.0550271		1.11445	0.0415302
	1.0497	0.0431134		1.25323	0.0548563		1.11406	0.0411411
	1.04925	0.0429361		1.25204	0.0546672		1.11377	0.0407489
	1.04885	0.0427381		1.25076	0.054462		1.11367	0.0403565
	1.04846	0.0425214		1.24946	0.0542296		1.11372	0.0399655
	1.04817	0.0422802		1.24818	0.0539635		1.11385	0.0395849
	1.04798	0.0420239		1.24695	0.0536791		1.11402	0.0392002
	1.04793	0.0417592		1.24569	0.0533961		1.11421	0.0388159
	1.048	0.0414797		1.24439	0.053106		1.11447	0.0384326
	1.04823	0.0411846		1.24302	0.0528158		1.11478	0.0380544
	1.04853	0.0408837		1.24158	0.0525203		1.11513	0.0376835
	1.0489	0.0405759		1.24009	0.0522295		1.11555	0.0373099
	1.04933	0.0402664		1.23855	0.0519452		1.11605	0.0369362
	1.04981	0.0399571		1.23707	0.0516496		1.11661	0.0365673
	1.05028	0.0396514		1.23563	0.0513586		1.11723	0.0362137
	1.0508	0.0393509		1.23427	0.0510716		1.11783	0.0358768
	1.0514	0.0390532		1.23292	0.0507824		1.11848	0.0355681
	1.05209	0.0387559		1.23158	0.0504936		1.11912	0.0352768
	1.05286	0.0384626		1.23016	0.0502087		1.11969	0.0349963
	1.05365	0.0381754		1.22861	0.0499288		1.12023	0.0347298
	1.05445	0.0378924		1.22713	0.0496374		1.12078	0.0344778
	1.05523	0.0376155		1.22561	0.0493479		1.12139	0.0342288
	1.05605	0.0373408		1.22412	0.0490475		1.12201	0.033993
	1.05695	0.0370705		1.22268	0.048735		1.12258	0.0337607
	1.05795	0.0368022		1.22131	0.0484209		1.12318	0.0335247
	1.05896	0.0365448		1.22003	0.0481079		1.12375	0.0332855
	1.05996	0.0362987		1.21887	0.0477928		1.12434	0.0330179
	1.06087	0.0360636		1.21773	0.0474843		1.12481	0.0327409
	1.0617	0.0358419		1.21658	0.0471785		1.12522	0.0324712
	1.06245	0.035626		1.21537	0.0468883		1.12557	0.0321969
	1.06309	0.0354197		1.21408	0.0466161		1.12589	0.0319395
	1.06359	0.0352242		1.2128	0.0463567		1.12616	0.0316913
	1.06399	0.0350367		1.21155	0.0461156		1.12638	0.0314474
	1.0643	0.0348577		1.21029	0.0458832		1.12657	0.0311899
	1.06453	0.0346865		1.2091	0.0456594		1.12677	0.0309534
	1.06464	0.0345197		1.20798	0.0454519		1.12685	0.0307094
	1.06455	0.0343526		1.20688	0.0452617		1.1269	0.030467
	1.06433	0.0341918		1.2058	0.0450841		1.1269	0.0302427
	1.06399	0.0340453		1.20473	0.0449084		1.1269	0.0300376
	1.0635	0.0339131		1.2037	0.0447337		1.12686	0.0298623
	1.06294	0.0337943		1.20274	0.0445625		1.1267	0.0296989
	1.06236	0.0336864		1.20186	0.0443841		1.12641	0.0295578
	1.06174	0.0335894		1.20099	0.0441999		1.12599	0.0294356
	1.06107	0.0335027		1.2001	0.0440105		1.12551	0.0293276
	1.06041	0.0334247		1.19922	0.043824		1.12496	0.0292326
	1.05977	0.0333554		1.1984	0.0436318		1.12434	0.0291659
	1.0591	0.0332995		1.19763	0.0434459		1.12362	0.0291226
	1.05847	0.033262		1.19694	0.0432695		1.12288	0.0291082
	1.0579	0.0332359		1.19629	0.0430995		1.12214	0.0291296
	1.05732	0.0332195		1.19566	0.0429352		1.12135	0.0291826
	1.05679	0.0332177		1.19516	0.0427739		1.12052	0.0292556
	1.05626	0.0332318		1.19475	0.0426235		1.11972	0.0293391
	1.05571	0.0332666		1.19448	0.0424804		1.11899	0.0294424
	1.05512	0.0333092		1.19426	0.0423526		1.11843	0.0295804
	1.05449	0.0333488		1.1941	0.0422407		1.11796	0.0297418
	1.05387	0.0333855		1.19402	0.0421468		1.1176	0.0299091
	1.05331	0.0334217		1.19396	0.042077		1.11726	0.030075
	1.05284	0.033453		1.19391	0.0420269		1.11688	0.0302368
	1.05238	0.0334844		1.19386	0.0419901		1.11646	0.030388
	1.05194	0.0335207		1.19382	0.0419573		1.11604	0.0305285
	1.05149	0.0335469		1.19378	0.0419329		1.11567	0.0306594
	1.05104	0.0335604		1.19373	0.041927		1.11544	0.030781
	1.05058	0.0335685		1.19362	0.041925		1.11527	0.0308949
	1.05015	0.0335691		1.19349	0.0419302		1.11507	0.0310086
	1.04969	0.0335731		1.19342	0.0419504		1.11486	0.0311218
	1.04919	0.0335904		1.19339	0.0419767		1.11459	0.031235
	1.04871	0.033623		1.19337	0.0420042		1.11439	0.031354
	1.04827	0.0336701		1.19335	0.0420372		1.11421	0.0314711
	1.04783	0.0337262		1.19327	0.0420801		1.114	0.0315934
	1.04737	0.0337906		1.19304	0.042133		1.11378	0.0317277
	1.0469	0.0338579		1.19288	0.0421862		1.11352	0.0318791
	1.04642	0.0339254		1.19264	0.0422458		1.11319	0.0320391
	1.04595	0.033988		1.19231	0.0422995		1.1128	0.0322039
	1.0455	0.0340496		1.19206	0.0423284		1.11238	0.0323696
	1.04519	0.0340939		1.19188	0.0423527		1.11207	0.0325274
	1.04499	0.0341154		1.19172	0.04237		1.11177	0.0326703
	1.04487	0.0341284		1.19153	0.042358		1.11154	0.0327814
	1.04477	0.0341407		1.19129	0.0423292		1.1113	0.0328873
	1.0447	0.0341517		1.19101	0.0422708		1.11095	0.0329973
	1.04473	0.0341664		1.19073	0.0422093		1.11052	0.0331087
	1.04475	0.0341933		1.19049	0.0421362		1.11008	0.0332216
	1.04471	0.034231		1.1903	0.0420459		1.10961	0.0333286
	1.04468	0.0342643		1.19018	0.0419524		1.10916	0.0334237
	1.04471	0.0342872		1.1901	0.04183		1.10872	0.0335129
	1.04485	0.0342973		1.19008	0.0416858		1.10827	0.0335966
	1.04495	0.0343032		1.19012	0.0415359		1.10782	0.0336774
	1.04494	0.0343076		1.1901	0.0413878		1.10747	0.0337329
	1.04487	0.0343028		1.19003	0.0412327		1.10723	0.0337861
	1.04472	0.0342985		1.18991	0.0410615		1.10704	0.0338438
	1.04446	0.0342952		1.18973	0.0408697		1.10684	0.0339164
	1.04415	0.0342921		1.18947	0.0406632		1.10657	0.0340004
	1.04374	0.0342868		1.18912	0.0404277		1.10625	0.0340982
	1.04325	0.0342797		1.18867	0.0401717		1.10589	0.0342008
	1.04272	0.0342633		1.18814	0.0398969		1.10547	0.0343139
	1.04212	0.0342349		1.18757	0.0396088		1.10503	0.0344202
	1.04145	0.0341908		1.18701	0.0392999		1.10456	0.034534
	1.04073	0.0341287		1.1864	0.0389834		1.10408	0.0346441
	1.03997	0.0340525		1.18578	0.0386615		1.10356	0.0347525
	1.03917	0.0339604		1.1851	0.0383318		1.10297	0.0348653
	1.03832	0.033847		1.1844	0.0379974		1.10231	0.0349573
	1.03758	0.03372		1.18365	0.0376665		1.10171	0.0350697
	1.03684	0.0335731		1.18296	0.0373409		1.10112	0.0351709
	1.03606	0.0334037		1.18232	0.0370103		1.10047	0.0352596
	1.03526	0.0332213		1.18171	0.0366763		1.0998	0.0353467
	1.03443	0.033019		1.18116	0.0363313		1.0991	0.0354386
	1.03358	0.0327867		1.18056	0.0359856		1.09839	0.0355252
	1.03277	0.0325494		1.18001	0.0356343		1.09763	0.0356085
	1.0321	0.0323102		1.17948	0.0352802		1.09682	0.0356766
	1.03144	0.0320586		1.179	0.034939		1.09596	0.0357143
	1.03079	0.0317949		1.17855	0.0346112		1.09502	0.0357409
	1.03017	0.0315023		1.17809	0.0342889		1.09406	0.035762
	1.02952	0.0311862		1.17765	0.0339757		1.09318	0.0357788
	1.02883	0.0308475		1.17725	0.0336648		1.09234	0.0357805
	1.02813	0.0304865		1.17687	0.0333644		1.09145	0.035757
	1.02739	0.0301099		1.17655	0.0330824		1.09047	0.0357245
	1.02664	0.0297181		1.17623	0.0328232		1.08942	0.0356641
	1.0259	0.0293204		1.17592	0.0325705		1.08835	0.0355992
	1.02514	0.0289169		1.1756	0.0323378		1.08721	0.03552
	1.02436	0.0285158		1.17519	0.0321331		1.08602	0.0354364
	1.02352	0.028128		1.17475	0.0319624		1.0848	0.0353611
	1.02263	0.027752		1.17429	0.0318145		1.08354	0.035287
	1.02172	0.0273824		1.17373	0.0317017		1.08231	0.0352315
	1.02084	0.0270334		1.17308	0.0316194		1.08104	0.0351889
	1.02002	0.0266995		1.17237	0.0315557		1.07973	0.0351615
	1.01931	0.0263636		1.17167	0.0315095		1.07843	0.035173
	1.01865	0.0260261		1.17098	0.0314835		1.07708	0.0352023
	1.01813	0.0256814		1.17027	0.0314646		1.07573	0.0352491
	1.01771	0.0253356		1.16949	0.0314681		1.0744	0.035325
	1.01735	0.0249851		1.16868	0.0314739		1.07305	0.0354056
	1.01709	0.024626		1.16786	0.0314995		1.0717	0.0354826
	1.01688	0.0242609		1.16708	0.0315309		1.0704	0.0355584
	1.0168	0.023872		1.16632	0.0315658		1.06914	0.0356381
	1.0168	0.0234757		1.1656	0.0316172		1.06789	0.0357147
	1.01684	0.0230679		1.16489	0.0316664		1.06667	0.0357974
	1.01698	0.0226513		1.16425	0.0317145		1.06542	0.0358817
	1.01717	0.0222303		1.1638	0.0317687		1.06418	0.0359699
	1.01738	0.0218175		1.16337	0.031841		1.06296	0.0360629
	1.01762	0.0214151		1.16298	0.0319313		1.06185	0.0361755
	1.01783	0.0210317		1.16263	0.0320451		1.06081	0.0363087
	1.018	0.0206697		1.16232	0.0321926		1.05972	0.0364351
	1.01815	0.0203222		1.16204	0.0323669		1.05865	0.0365661
	1.01828	0.0199928		1.16175	0.0325592		1.05759	0.0367006
	1.01842	0.0196746		1.16141	0.0327716		1.0566	0.0368289
	1.0186	0.0193687		1.16105	0.0329989		1.05567	0.0369581
	1.01877	0.019082		1.16072	0.0332279		1.05479	0.0370882
	1.01889	0.0188204		1.16055	0.0334456		1.05399	0.037218
	1.01897	0.0185875		1.16055	0.0336545		1.05329	0.0373395
	1.01901	0.0183795		1.16064	0.0338423		1.05265	0.0374622
	1.01899	0.0181972		1.16083	0.0339962		1.052	0.0375768
	1.0189	0.0180454		1.1611	0.0341227		1.05143	0.0376871
	1.01887	0.0179149		1.1615	0.0342196		1.05103	0.0378194
	1.01878	0.0178266		1.16197	0.0342916		1.05072	0.0379494
	1.01863	0.0177863		1.16247	0.034334		1.05041	0.0380789
	1.01847	0.0177955		1.16299	0.0343535		1.05009	0.0382
	1.01822	0.0178611		1.1635	0.0343552		1.0498	0.0383139
	1.01794	0.0179814		1.16395	0.0343441		1.04952	0.0384224
	1.01767	0.0181523		1.16443	0.0343245		1.0493	0.0385167
	1.01747	0.018371		1.16503	0.0343073		1.04911	0.0385983
	1.01725	0.0186429		1.1657	0.0342894		1.04897	0.038662
	1.01704	0.0189681		1.16638	0.0342671		1.0488	0.0387194
	1.0168	0.0193442		1.16703	0.034254		1.04859	0.0387637
	1.01658	0.0197683		1.16767	0.0342585		1.04844	0.0387847
	1.01634	0.0202346		1.16841	0.0342894		1.04831	0.0387827
	1.01611	0.0207342		1.16921	0.0343459		1.04817	0.0387558
	1.01592	0.021257		1.17011	0.0344322		1.04796	0.038706
	1.01572	0.0217965		1.17107	0.0345464		1.04775	0.0386252
	1.01549	0.0223496		1.17212	0.0346864		1.04749	0.0385239
	1.01524	0.022918		1.17315	0.0348442		1.04719	0.0384058
	1.01495	0.0235025		1.17408	0.0350099		1.04685	0.0382748
	1.01463	0.0241065		1.17497	0.035204		1.04643	0.0381403
	1.01436	0.0247176		1.17582	0.0354149		1.04593	0.0379984
	1.01408	0.0253431		1.17661	0.0356487		1.04541	0.0378586
	1.01377	0.025985		1.17734	0.0359026		1.04487	0.0377178
	1.01344	0.0266331		1.178	0.0361705		1.0443	0.0375688
	1.01308	0.027286		1.17863	0.036447		1.04368	0.0374079
	1.01271	0.0279453		1.17917	0.0367278		1.04304	0.0372322
	1.01234	0.0286087		1.17957	0.0370169		1.04234	0.0370457
	1.012	0.0292721		1.17988	0.0373112		1.04164	0.0368591
	1.01172	0.0299321		1.18012	0.0376172		1.04102	0.0366545
	1.01145	0.0305932		1.18031	0.0379271		1.04043	0.0364265
	1.01117	0.0312568		1.18051	0.0382422		1.03988	0.0361872
	1.01099	0.0319004		1.18066	0.0385595		1.03935	0.0359449
	1.0109	0.0325355		1.18081	0.0388928		1.03889	0.0356987
	1.01081	0.0331707		1.18098	0.0392332		1.03848	0.0354603
	1.01075	0.0337992		1.18122	0.0395946		1.03809	0.035244
	1.0108	0.0344085		1.18154	0.0399768		1.03771	0.0350483
	1.01096	0.035007		1.18184	0.0403679		1.03731	0.0348833
	1.01124	0.03559		1.18214	0.0407611		1.03696	0.0347477
	1.01168	0.0361533		1.18243	0.041169		1.03665	0.034657
	1.01223	0.0367062		1.18265	0.041588		1.0363	0.0346176
	1.01283	0.0372537		1.18274	0.042019		1.03593	0.0346176
	1.01352	0.0377902		1.18275	0.0424552		1.03555	0.0346625
	1.01431	0.0383101		1.18262	0.0428956		1.03524	0.0347474
	1.01519	0.0388116		1.18242	0.0433368		1.03507	0.0348601
	1.01619	0.0392933		1.18221	0.0437633		1.03502	0.0350118
	1.01731	0.0397536		1.18204	0.0441813		1.03507	0.0351874
	1.01856	0.0401992		1.18196	0.0446077		1.03526	0.0353739
	1.01993	0.0406365		1.18186	0.0450265		1.0356	0.0355897
	1.02139	0.0410835		1.1818	0.0454385		1.03602	0.0358226
	1.02289	0.0415483		1.18178	0.0458622		1.03656	0.0360708
	1.02444	0.0420274		1.18181	0.0462866		1.0372	0.0363383
	1.02602	0.04252		1.18183	0.0467107		1.03798	0.036614
	1.02765	0.0430213		1.18174	0.04712		1.03885	0.0369066
	1.02935	0.0435215		1.18163	0.0475199		1.03982	0.0372105
	1.03111	0.0440255		1.18143	0.0478995		1.04094	0.0375322
	1.03289	0.0445369		1.18117	0.0482626		1.04212	0.0378602
	1.03472	0.0450549		1.1809	0.0486265		1.04339	0.0381836
	1.03658	0.0455778		1.18073	0.0489915		1.04475	0.038501
	1.03846	0.0461033		1.18066	0.0493609		1.04618	0.0388171
	1.04032	0.0466468		1.18066	0.0497406		1.04769	0.039126
	1.04217	0.047202		1.18066	0.0501298		1.0493	0.0394229
	1.04403	0.0477635		1.18073	0.0505373		1.05099	0.0397143
	1.04588	0.0483296		1.18087	0.0509611		1.05271	0.0399943
	1.04768	0.0488965		1.18102	0.0513951		1.05443	0.0402688
	1.04947	0.0494588		1.18121	0.0518395		1.05612	0.0405249
	1.05124	0.0500151		1.18148	0.0522906		1.05777	0.0407634
	1.05296	0.0505712		1.1817	0.0527543		1.05937	0.0409856
	1.05462	0.0511264		1.18191	0.0532164		1.06098	0.0411846
	1.05622	0.0516712		1.18206	0.0536828		1.06255	0.0413689
	1.05781	0.0522024		1.18221	0.0541574		1.06405	0.0415505
	1.05941	0.0527145		1.18235	0.0546462		1.06541	0.0417182
	1.06097	0.0532107		1.18253	0.0551717		1.06665	0.04187
	1.0624	0.053701		1.18274	0.055737		1.06782	0.0420108
	1.06366	0.054183		1.18302	0.0563392		1.06892	0.0421373
	1.06477	0.0546586		1.18328	0.0569607		1.07	0.0422443
	1.06583	0.055126		1.18347	0.0575928		1.07101	0.042335
	1.06683	0.0555927		1.18353	0.0582361		1.07193	0.0424128
	1.0678	0.0560543		1.18361	0.0588877		1.07283	0.0424973
	1.06874	0.0565046		1.18359	0.059545		1.07377	0.0425921
	1.0696	0.0569454		1.18354	0.0602049		1.0747	0.0426905
	1.07036	0.0573734		1.18351	0.0608636		1.07557	0.0427832
	1.07098	0.0577924		1.18349	0.0615202		1.07636	0.042873
	1.07145	0.0582024		1.18345	0.0621852		1.07709	0.0429745
	1.07174	0.0586068		1.18345	0.0628586		1.07768	0.0430834
	1.07195	0.0590016		1.18353	0.063549		1.07811	0.0432002
	1.07205	0.0593894		1.18364	0.0642549		1.07831	0.0433177
	1.07201	0.0597721		1.18373	0.0649707		1.07831	0.0434402
	1.07187	0.0601494		1.18386	0.0656956		1.07822	0.0435884
	1.07166	0.0605151		1.18398	0.0664253		1.07797	0.0437523
	1.07138	0.060865		1.18402	0.0671583		1.07754	0.0439283
	1.07103	0.0612017		1.18404	0.0678866		1.07697	0.0441177
	1.07064	0.0615203		1.18405	0.0686076		1.0763	0.0443238
	1.07018	0.0618199		1.18402	0.0693287		1.07561	0.0445472
	1.06963	0.0621014		1.18394	0.0700524		1.07498	0.0447915
	1.06904	0.0623669		1.18384	0.0707719		1.07438	0.0450613
	1.06849	0.0626245		1.18377	0.0714937		1.07375	0.0453555
	1.06802	0.062876		1.18367	0.0722126		1.07311	0.0456691
	1.06749	0.0631236		1.18361	0.0729243		1.07251	0.0460202
	1.06694	0.0633681		1.18365	0.0736276		1.07194	0.0463961
	1.06634	0.0636112		1.18377	0.0743436		1.07141	0.0467919
	1.0657	0.0638522		1.18396	0.075066		1.07089	0.0472137
	1.06504	0.0640914		1.18423	0.0757985		1.07038	0.0476592
	1.06442	0.0643237		1.18446	0.0765423		1.06988	0.0481334
	1.06382	0.0645535		1.18474	0.0772995		1.06947	0.048629
	1.06328	0.0647804		1.18498	0.0780617		1.06912	0.0491443
	1.06278	0.0650059		1.18527	0.0788314		1.06878	0.0496706
	1.06244	0.06523		1.1856	0.0795947		1.06845	0.0502061
	1.06218	0.0654514		1.18603	0.0803454		1.06809	0.0507479
	1.06201	0.0656675		1.18654	0.0810865		1.06772	0.0512906
	1.062	0.0658793		1.18705	0.0818169		1.06734	0.0518294
	1.06207	0.0660857		1.18754	0.0825384		1.06696	0.0523636
	1.06224	0.0662802		1.18813	0.0832538		1.06655	0.0528944
	1.06245	0.0664658		1.18875	0.0839612		1.06611	0.0534199
	1.06268	0.0666423		1.18941	0.0846583		1.06561	0.0539458
	1.06294	0.0668121		1.19013	0.0853401		1.06507	0.0544696
	1.06314	0.0669778		1.19086	0.0860126		1.06447	0.054988
	1.06333	0.067144		1.19155	0.0866811		1.06382	0.0555014
	1.06348	0.0673072		1.19224	0.0873411		1.06317	0.0560042
	1.06361	0.0674663		1.19292	0.0879891		1.06248	0.0564986
	1.06374	0.0676133		1.19352	0.088632		1.06182	0.056992
	1.06385	0.0677415		1.19414	0.0892718		1.06108	0.0574771
	1.06396	0.0678639		1.1948	0.0899095		1.06029	0.0579439
	1.06405	0.0679785		1.19554	0.090544		1.05962	0.0584033
	1.06415	0.0680909		1.19631	0.0911717		1.05894	0.058847
	1.06419	0.0682025		1.19712	0.0917875		1.05832	0.0592666
	1.06427	0.0683258		1.19791	0.0923879		1.05764	0.0596679
	1.06435	0.0684566		1.19865	0.0929811		1.057	0.0600531
	1.06437	0.0685895		1.19941	0.0935674		1.0564	0.0604166
	1.06442	0.0687282		1.2001	0.0941491		1.05587	0.0607611
	1.06444	0.0688644		1.20079	0.0947281		1.05545	0.0610855
	1.06449	0.0689959		1.20145	0.0953092		1.05506	0.0613868
	1.06455	0.0691181		1.20203	0.0959011		1.05475	0.0616593
	1.06455	0.0692221		1.20261	0.0964993		1.05453	0.0619149
	1.06442	0.0693099		1.20316	0.0970947		1.05427	0.0621454
	1.06421	0.06939		1.20365	0.0976882		1.05397	0.0623517
	1.06391	0.0694564		1.20414	0.0982817		1.05355	0.0625334
	1.0635	0.0695083		1.20457	0.098876		1.05304	0.0626939
	1.06296	0.069543		1.20502	0.099463		1.05254	0.0628382
	1.06233	0.0695582		1.20551	0.100046		1.052	0.0629619
	1.0616	0.0695547		1.20598	0.100625		1.05139	0.0630657
	1.06081	0.0695369		1.20649	0.101191		1.05076	0.0631504
	1.05999	0.0695011		1.20704	0.10174		1.05016	0.0632202
	1.05908	0.0694446		1.20753	0.10228		1.04962	0.0632718
	1.05808	0.0693725		1.20797	0.102817		1.04912	0.0633057
	1.05703	0.0692817		1.20841	0.10335		1.04871	0.0633267
	1.05598	0.0691717		1.2088	0.103875		1.04836	0.0633414
	1.05496	0.0690585		1.20913	0.104396		1.04804	0.0633571
	1.05387	0.0689415		1.20947	0.104913		1.0478	0.0633694
	1.05282	0.0688308		1.20996	0.105427		1.04762	0.0633642
	1.0518	0.0687301		1.21052	0.105936		1.04757	0.0633423
	1.05076	0.0686484		1.21119	0.106438		1.04764	0.0633162
	1.04974	0.0685894		1.21194	0.106939		1.04778	0.0632856
	1.04872	0.0685513		1.21276	0.107438		1.04797	0.0632523
	1.04768	0.0685321		1.21368	0.107934		1.04822	0.0632126
	1.04668	0.0685309		1.21471	0.108424		1.04849	0.0631614
	1.04568	0.0685506		1.21582	0.108912		1.04884	0.0630979
	1.04476	0.0685921		1.21705	0.109411		1.04929	0.0630176
	1.04391	0.0686555		1.21836	0.109924		1.04973	0.0629324
	1.04315	0.0687336		1.21979	0.110452		1.05018	0.0628333
	1.04262	0.0688264		1.22133	0.110996		1.05059	0.0627225
	1.04223	0.0689376		1.22295	0.111546		1.0509	0.0626001
	1.04197	0.0690638		1.22474	0.112107		1.05113	0.0624593
	1.04182	0.0692012		1.22652	0.11268		1.05126	0.0623084
	1.04177	0.0693475		1.22832	0.113261		1.05134	0.0621663
	1.04177	0.0695077		1.23016	0.113846		1.05136	0.0620264
	1.04183	0.0696851		1.23204	0.11444		1.05133	0.0618866
	1.04205	0.0698793		1.23402	0.115037		1.0513	0.0617473
	1.04232	0.0700926		1.23607	0.115645		1.05122	0.0616008
	1.04262	0.0703235		1.23818	0.116259		1.05109	0.0614508
	1.04297	0.0705711		1.24027	0.116879		1.05096	0.0613108
	1.04331	0.0708341		1.24241	0.117501		1.05073	0.0611743
	1.04366	0.0711105		1.24453	0.118147		1.05046	0.0610391
	1.04401	0.0714008		1.24669	0.118819		1.05031	0.0609282
	1.04444	0.0717054		1.24886	0.119516		1.05012	0.060834
	1.04488	0.0720339		1.25105	0.120218		1.04991	0.0607556
	1.04536	0.0723831		1.25323	0.120922		1.04963	0.0606898
	1.04587	0.0727519		1.2554	0.121616		1.04935	0.0606441
	1.04641	0.0731394		1.2575	0.122295		1.04906	0.0606129
	1.04702	0.0735433		1.2595	0.122958		1.04878	0.0605944
	1.04767	0.0739657		1.26151	0.123603		1.04852	0.0605902
	1.04837	0.0744027		1.26345	0.124228		1.04824	0.0605978
	1.04917	0.0748539		1.26526	0.12483		1.04799	0.0606179
	1.04998	0.0753207		1.26693	0.125413		1.0478	0.0606537
	1.05078	0.0758044		1.26848	0.12598		1.0476	0.0607005
	1.05159	0.0763039		1.26995	0.126525		1.04737	0.0607499
	1.05242	0.0768245		1.27141	0.127045		1.04714	0.060803
	1.05335	0.0773652		1.27284	0.127537		1.04697	0.0608573
	1.05441	0.0779201		1.27417	0.127994		1.04691	0.0609177
	1.05557	0.0784882		1.27535	0.12842		1.04688	0.0609885
	1.05686	0.079067		1.27638	0.128817		1.04688	0.0610726
	1.05819	0.0796596		1.27732	0.129181		1.04688	0.0611738
	1.05956	0.0802671		1.27821	0.129505		1.04692	0.061293
	1.06098	0.0808853		1.27902	0.129796		1.04699	0.0614281
	1.06245	0.0815109		1.27975	0.130057		1.04701	0.061581
	1.06407	0.0821447		1.28043	0.130289		1.04701	0.0617549
	1.06581	0.0827876		1.28102	0.130499		1.04706	0.0619506
	1.06762	0.0834366		1.28149	0.130677		1.0471	0.0621683
	1.06948	0.0840927		1.28188	0.130824		1.04714	0.0624076
	1.07138	0.0847533		1.28222	0.130948		1.04719	0.0626707
	1.07337	0.0854155		1.28252	0.131066		1.04729	0.0629586
	1.07541	0.0860848		1.28278	0.131178		1.04751	0.0632651
	1.07752	0.0867666		1.28302	0.131284		1.04786	0.0635916
	1.07969	0.0874577		1.28321	0.131387		1.0483	0.0639373
	1.08191	0.0881594		1.28337	0.13148		1.04879	0.0643017
	1.08421	0.0888675		1.28358	0.131575		1.04931	0.06469
	1.08653	0.0895758		1.28393	0.131669		1.04996	0.065095
	1.08891	0.0902889		1.2843	0.13176		1.05072	0.0655149
	1.09131	0.0910093		1.28467	0.131847		1.05154	0.0659525
	1.09372	0.0917303		1.28508	0.131922		1.05247	0.066402
	1.09619	0.0924519		1.28553	0.131979		1.05347	0.0668633
	1.09874	0.0931707		1.28597	0.132019		1.05456	0.0673306
	1.1013	0.0938756		1.28643	0.132039		1.05575	0.0678014
	1.1039	0.0945642		1.28686	0.132035		1.05696	0.0682835
	1.10655	0.0952331		1.28724	0.132008		1.05823	0.0687769
	1.10921	0.0958866		1.28758	0.13196		1.05953	0.0692782
	1.11196	0.0965183		1.28796	0.1319		1.06084	0.0697887
	1.11486	0.0971423		1.28842	0.131818		1.06216	0.0703054
	1.11791	0.0977731		1.28897	0.131719		1.06346	0.0708274
	1.12104	0.0984042		1.2896	0.131601		1.06472	0.0713544
	1.12419	0.099038		1.29023	0.131462		1.06595	0.0718818
	1.12727	0.0996674		1.29086	0.131305		1.06716	0.0724095
	1.13031	0.100286		1.29149	0.131133		1.06838	0.0729346
	1.13325	0.100895		1.29214	0.130944		1.06966	0.0734526
	1.13613	0.101495		1.29279	0.130741		1.07092	0.0739691
	1.13893	0.102081		1.29349	0.130551		1.07214	0.0744833
	1.14167	0.102667		1.29417	0.130368		1.07336	0.074993
	1.14433	0.103258		1.29479	0.130202		1.07455	0.0754969
	1.14693	0.103851		1.29531	0.130053		1.0757	0.0759942
	1.14952	0.104459		1.29575	0.129913		1.07683	0.076483
	1.15204	0.105063		1.29617	0.129778		1.07791	0.0769633
	1.15444	0.10566		1.29658	0.129644		1.07898	0.0774321
	1.15677	0.106235		1.29698	0.129516		1.0801	0.0778847
	1.15905	0.106785		1.29737	0.129389		1.08122	0.078322
	1.16122	0.107305		1.29772	0.129246		1.08228	0.0787461
	1.16328	0.107795		1.29804	0.129088		1.0833	0.0791509
	1.16524	0.108245		1.29841	0.128917		1.08428	0.0795324
	1.16724	0.108678		1.29881	0.128736		1.0853	0.079883
	1.16925	0.10909		1.29925	0.128547		1.08638	0.0802012
	1.17121	0.10947		1.29967	0.128353		1.08751	0.0804902
	1.17316	0.109827		1.30009	0.128153		1.08865	0.0807548
	1.17498	0.110156		1.30052	0.127942		1.0898	0.0809963
	1.17669	0.110464		1.30093	0.127718		1.09096	0.0812171
	1.17831	0.11075		1.30135	0.127477		1.0921	0.0814192
	1.1798	0.111015		1.30179	0.127226		1.09327	0.0816037
	1.1813	0.111279		1.30217	0.126963		1.09442	0.0817694
	1.18274	0.111537		1.30253	0.126685		1.09554	0.0819164
	1.18414	0.111783		1.30285	0.126403		1.09664	0.082048
	1.18553	0.112027		1.30318	0.126124		1.09776	0.0821619
	1.18691	0.112278		1.30359	0.125864		1.09887	0.0822591
	1.1883	0.112542		1.30406	0.125626		1.09994	0.0823448
	1.18971	0.112833		1.30463	0.125415		1.10103	0.08242
	1.19115	0.113151		1.30535	0.12523		1.10216	0.0824915
	1.19259	0.113501		1.30615	0.125064		1.10338	0.0825663
	1.19406	0.113883		1.30702	0.124912		1.10465	0.0826415
	1.1955	0.114281		1.30799	0.124777		1.10595	0.0827253
	1.19694	0.114694		1.30915	0.124674		1.10733	0.0828304
	1.19843	0.11513		1.31035	0.124591		1.1088	0.0829585
	1.19993	0.115588		1.31163	0.124546		1.11034	0.0831122
	1.20145	0.116059		1.31303	0.124552		1.11199	0.0832943
	1.20302	0.116552		1.31451	0.124604		1.11374	0.0835122
	1.20459	0.117066		1.31605	0.124704		1.11565	0.0837733
	1.2062	0.117598		1.31766	0.124856		1.11771	0.0840792
	1.20787	0.118148		1.31927	0.125054		1.11983	0.0844329
	1.20947	0.118685		1.32066	0.125255		1.12175	0.0847809
	1.211	0.119212		1.32177	0.125451		1.12348	0.0851157
	1.21252	0.119729		1.32265	0.125652		1.12495	0.0854042
	1.21412	0.120256		1.32342	0.125852		1.1261	0.0856351
	1.21593	0.120829		1.32416	0.12606		1.12692	0.085794
	1.21785	0.121406		1.3248	0.126272		1.1274	0.0858618
	1.21989	0.12199		1.32546	0.126507		1.12755	0.0858494
	1.22199	0.122565		1.32603	0.126766		1.12746	0.085776
	1.22416	0.123119		1.32671	0.127056		1.12715	0.0856571
	1.22632	0.123648		1.32748	0.127384		1.12667	0.0854867
	1.2285	0.124155		1.32834	0.127735		1.12601	0.0852456
	1.2307	0.124651		1.32923	0.128101		1.12517	0.0849275
	1.23283	0.125167		1.33008	0.128481		1.1242	0.0845442
	1.2349	0.125694		1.33086	0.128871		1.12308	0.0840864
	1.23684	0.126217		1.33153	0.12926		1.12177	0.0835369
	1.23881	0.126772		1.3321	0.129645		1.12027	0.0829016
	1.2407	0.127342		1.33262	0.130033		1.11858	0.0821851
	1.24251	0.127935		1.33306	0.130414		1.11675	0.0814023
	1.24428	0.128553		1.33345	0.13079		1.11489	0.0806122
	1.24601	0.129185		1.33377	0.131158		1.11295	0.0798015
	1.24766	0.129824		1.33401	0.131521		1.11087	0.078951
	1.24922	0.130475		1.33415	0.131876		1.10867	0.0780592
	1.25075	0.131141		1.33426	0.132245		1.10637	0.0771288
	1.25244	0.13188		1.33431	0.132619		1.104	0.0761706
	1.18842	0.109925		1.3266	0.130514		1.1387	0.0864958
	1.18928	0.110218		1.32577	0.130164		1.137	0.0862882
	1.19009	0.110492		1.32492	0.129804		1.1352	0.0860661
	1.1908	0.110744		1.32418	0.129461		1.1333	0.0858376
	1.19146	0.110991		1.32339	0.129109		1.13133	0.0856053
	1.19207	0.111234		1.32251	0.128746		1.1293	0.0853739
	1.1926	0.111473		1.3216	0.128382		1.12736	0.0851682
	1.1931	0.111707		1.32061	0.128011		1.12546	0.0849758
	1.19353	0.111932		1.31958	0.127634		1.12358	0.0847889
	1.19394	0.112153		1.31851	0.127268		1.1218	0.084617
	1.19436	0.112375		1.31745	0.126913		1.12013	0.0844573
	1.19482	0.11261		1.31648	0.126585		1.11858	0.0843042
	1.19531	0.112855		1.31557	0.126278		1.11713	0.0841573
	1.19583	0.11312		1.31473	0.125998		1.1158	0.0840186
	1.19638	0.113408		1.31405	0.125746		1.11465	0.0838862
	1.19697	0.113729		1.31359	0.125521		1.11374	0.0837761
	1.19762	0.114085		1.31329	0.125315		1.11305	0.0836788
	1.19832	0.114454		1.3132	0.12513		1.11258	0.0835964
	1.19906	0.114838		1.31325	0.124971		1.11235	0.083537
	1.19992	0.11524		1.31345	0.124832		1.1124	0.0835043
	1.20089	0.115663		1.31381	0.12473		1.11277	0.0835067
	1.20199	0.116108		1.31439	0.124675		1.11345	0.083551
	1.20327	0.11658		1.3152	0.124673		1.11451	0.0836532
	1.20467	0.117076		1.31629	0.124728		1.11593	0.0838248
	1.20641	0.117598		1.3179	0.124853		1.11793	0.084086
	1.20723	0.118146		1.31856	0.125061		1.11917	0.0844104
	1.20642	0.118697		1.3174	0.125317		1.11875	0.0847196
	1.20407	0.119257		1.31444	0.125618		1.11676	0.0850046
	1.20024	0.11983		1.30978	0.125973		1.1132	0.0852453
	1.19505	0.120432		1.30357	0.126373		1.10812	0.0854346
	1.18867	0.121085		1.29593	0.126836		1.10156	0.0855653
	1.18108	0.121767		1.28689	0.127357		1.09359	0.0856293
	1.17236	0.122486		1.2766	0.127948		1.08426	0.0856351
	1.16255	0.123239		1.26508	0.128618		1.07369	0.0855965
	1.15173	0.124028		1.25247	0.12937		1.06193	0.0855266
	1.13991	0.124856		1.23887	0.130213		1.04909	0.0854289
	1.12717	0.125733		1.22432	0.131143		1.03521	0.0853011
	1.11359	0.126674		1.20889	0.132156		1.02036	0.085148
	1.09919	0.127695		1.19261	0.133255		1.00462	0.0849825
	1.08402	0.128792		1.17551	0.134437		0.98805	0.0848088
	1.06814	0.129966		1.15765	0.135699		0.970688	0.0846279
	1.05168	0.131234		1.13911	0.13704		0.952599	0.084452
	1.03466	0.132592		1.11996	0.138459		0.933841	0.0842922
	1.01713	0.134047		1.10025	0.139952		0.914498	0.0841646
	0.999211	0.135609		1.08006	0.141514		0.894695	0.0841028
	0.980943	0.137265		1.05944	0.143145		0.874465	0.0841095
	0.962375	0.139011		1.03848	0.144848		0.853836	0.0841848
	0.94356	0.140849		1.01721	0.146617		0.83289	0.0843343
	0.924598	0.142775		0.995746	0.148455		0.811689	0.0845648
	0.90568	0.144822		0.974136	0.150353		0.790317	0.0848843

## Sheet: Fig3F
Null
	Before			MIRS			After
	Mean	SEM		Mean	SEM		Mean	SEM
	1.13536	0.165497		0.969604	0.158582		1.00216	0.124841
	1.17014	0.173373		1.00007	0.165403		1.03591	0.131313
	1.20467	0.181527		1.03031	0.17239		1.06929	0.137897
	1.23882	0.18986		1.06025	0.179477		1.1022	0.144531
	1.27246	0.198295		1.08982	0.186604		1.1345	0.151146
	1.30545	0.206731		1.11887	0.193716		1.16608	0.157696
	1.33766	0.215105		1.14732	0.20078		1.19681	0.16412
	1.369	0.223355		1.17505	0.207745		1.2266	0.170378
	1.39938	0.231427		1.20197	0.214564		1.25531	0.176425
	1.42864	0.239267		1.22795	0.221168		1.28286	0.182224
	1.45669	0.246838		1.25287	0.227515		1.30915	0.187743
	1.48332	0.254062		1.2766	0.233565		1.33407	0.192949
	1.50842	0.260899		1.29905	0.239275		1.35752	0.197809
	1.53187	0.267282		1.3201	0.244609		1.3794	0.202294
	1.55351	0.273176		1.33968	0.249523		1.39961	0.206376
	1.57326	0.278545		1.35769	0.25398		1.41802	0.210023
	1.59097	0.283321		1.37405	0.257948		1.43455	0.213206
	1.60656	0.287468		1.38862	0.261396		1.44907	0.215897
	1.61995	0.290985		1.40129	0.264291		1.46149	0.218053
	1.63104	0.293852		1.41195	0.266593		1.47168	0.219631
	1.63964	0.296001		1.42048	0.268298		1.47955	0.220612
	1.64561	0.297324		1.42679	0.269376		1.48499	0.220964
	1.64882	0.297788		1.43077	0.269799		1.4879	0.220661
	1.64921	0.297445		1.43231	0.26953		1.48818	0.21968
	1.6466	0.296215		1.43135	0.268543		1.48572	0.217998
	1.64082	0.294035		1.42777	0.26681		1.48043	0.215607
	1.63299	0.291244		1.42258	0.26467		1.47337	0.212795
	1.6254	0.288442		1.41801	0.262839		1.46678	0.210185
	1.61763	0.285527		1.41362	0.261175		1.4603	0.207682
	1.60972	0.282535		1.4092	0.259528		1.45394	0.205276
	1.60162	0.2794		1.40481	0.257906		1.44768	0.202942
	1.59343	0.276156		1.40041	0.256304		1.44152	0.20067
	1.58515	0.272819		1.39599	0.254727		1.43551	0.198493
	1.57675	0.26937		1.39158	0.253185		1.42968	0.19642
	1.5682	0.265787		1.38726	0.2517		1.42402	0.194435
	1.55954	0.26209		1.38305	0.250281		1.41852	0.19251
	1.55079	0.258296		1.37901	0.248992		1.4131	0.190599
	1.54195	0.254405		1.37501	0.247744		1.40779	0.188721
	1.53303	0.250436		1.371	0.246513		1.40259	0.186861
	1.52406	0.246389		1.36698	0.245265		1.39744	0.184973
	1.51502	0.242239		1.3629	0.243955		1.39234	0.183056
	1.50592	0.238005		1.35873	0.242626		1.38727	0.181085
	1.49677	0.233704		1.35452	0.241286		1.38223	0.179081
	1.4876	0.229339		1.35022	0.239905		1.37725	0.177054
	1.47844	0.224929		1.34585	0.238486		1.3723	0.175001
	1.46924	0.22044		1.34137	0.237002		1.36739	0.172944
	1.46005	0.215894		1.33681	0.23546		1.36255	0.170902
	1.45093	0.211363		1.33223	0.233905		1.35779	0.168873
	1.44188	0.206829		1.32756	0.232283		1.3531	0.166843
	1.43292	0.202306		1.3228	0.230603		1.34846	0.164811
	1.424	0.197792		1.31798	0.228872		1.34386	0.162777
	1.41518	0.193348		1.31305	0.227067		1.3393	0.160744
	1.40644	0.188954		1.308	0.225198		1.33477	0.158732
	1.39778	0.184611		1.30283	0.223271		1.3303	0.156729
	1.38929	0.180372		1.29759	0.221295		1.32586	0.154731
	1.38084	0.176136		1.29236	0.219279		1.32144	0.152737
	1.37245	0.171902		1.28715	0.217258		1.31701	0.150737
	1.36413	0.167695		1.28207	0.215296		1.31259	0.148729
	1.3559	0.163536		1.27705	0.213334		1.30816	0.146714
	1.34781	0.159431		1.27207	0.211359		1.30372	0.144666
	1.33986	0.155411		1.26719	0.209374		1.29926	0.142597
	1.33206	0.151468		1.26234	0.207382		1.29479	0.14052
	1.32445	0.147624		1.25747	0.205354		1.29045	0.138504
	1.31702	0.143876		1.25265	0.203332		1.28617	0.136534
	1.30987	0.140311		1.24783	0.201313		1.28197	0.134617
	1.30291	0.136874		1.24295	0.199244		1.2778	0.132745
	1.29613	0.133553		1.238	0.197105		1.27365	0.130909
	1.28954	0.130363		1.23298	0.194911		1.26956	0.129129
	1.28318	0.127344		1.22788	0.192638		1.26549	0.127399
	1.2771	0.124525		1.22271	0.190304		1.26141	0.125718
	1.27132	0.121881		1.21754	0.187944		1.25738	0.124098
	1.26582	0.119359		1.21244	0.185562		1.25337	0.122541
	1.26064	0.117029		1.20745	0.183172		1.24937	0.121041
	1.25577	0.11489		1.20255	0.180785		1.24543	0.119622
	1.25112	0.112908		1.19772	0.178419		1.24158	0.118306
	1.24668	0.11106		1.19298	0.176091		1.23783	0.117098
	1.24259	0.109423		1.18826	0.173796		1.23416	0.115986
	1.23873	0.107909		1.18357	0.171549		1.23057	0.114963
	1.23509	0.106518		1.17889	0.169357		1.22704	0.114018
	1.23164	0.105238		1.1742	0.167208		1.22354	0.113129
	1.22831	0.104038		1.16949	0.165081		1.22007	0.112293
	1.22514	0.102925		1.16474	0.162977		1.21663	0.111509
	1.22214	0.101901		1.16	0.160899		1.21328	0.110793
	1.21925	0.100967		1.15525	0.158855		1.21012	0.110171
	1.21642	0.100076		1.15062	0.156894		1.207	0.109569
	1.21367	0.0992346		1.1461	0.155015		1.20399	0.109006
	1.21107	0.0984684		1.14161	0.153182		1.20106	0.108467
	1.20855	0.0977636		1.13721	0.15141		1.1982	0.107952
	1.20611	0.0971294		1.13285	0.149682		1.19534	0.107431
	1.20385	0.0965924		1.12857	0.14801		1.19243	0.106888
	1.20176	0.0961301		1.1243	0.146356		1.1895	0.106331
	1.19983	0.0957162		1.1201	0.144749		1.18652	0.105746
	1.19799	0.095341		1.11606	0.143209		1.1835	0.105144
	1.19616	0.0949748		1.11223	0.141768		1.18045	0.104516
	1.19434	0.0946151		1.10849	0.140374		1.17737	0.10386
	1.19253	0.0942425		1.10483	0.139009		1.17427	0.103184
	1.19073	0.0938544		1.10125	0.13769		1.17113	0.102487
	1.18901	0.0934878		1.09783	0.136442		1.16795	0.101766
	1.18729	0.0931076		1.09446	0.135241		1.16469	0.101018
	1.18554	0.0927189		1.09113	0.13408		1.16138	0.100246
	1.18374	0.0923093		1.08777	0.132916		1.15806	0.0994573
	1.18196	0.0919088		1.08446	0.131769		1.15474	0.0986568
	1.18021	0.0915135		1.08115	0.130615		1.15146	0.0978491
	1.17847	0.091138		1.07788	0.129462		1.14824	0.0970397
	1.17679	0.0908076		1.07469	0.128334		1.14509	0.0962302
	1.17506	0.090473		1.07161	0.12725		1.142	0.0954201
	1.17334	0.0901621		1.06863	0.126201		1.13895	0.0945955
	1.1715	0.0898109		1.06576	0.12519		1.13591	0.0937594
	1.16954	0.089425		1.06288	0.124167		1.13293	0.0929209
	1.16746	0.0890092		1.06012	0.12318		1.12994	0.0920795
	1.16527	0.0885672		1.05747	0.122233		1.12699	0.0912499
	1.16305	0.0881291		1.05487	0.121306		1.12408	0.0904374
	1.16079	0.0876855		1.05228	0.120385		1.12134	0.0896551
	1.15855	0.08723		1.0498	0.119507		1.11872	0.0889032
	1.15635	0.0867957		1.04741	0.118635		1.11617	0.0881769
	1.15408	0.0863407		1.04498	0.117734		1.11368	0.0874762
	1.15175	0.085865		1.0425	0.116796		1.11123	0.0868043
	1.14941	0.0853928		1.04	0.115834		1.10887	0.0861856
	1.14705	0.0849238		1.03744	0.11484		1.10658	0.0856159
	1.14469	0.0844614		1.0349	0.11384		1.10435	0.0850995
	1.14229	0.0840034		1.03235	0.11285		1.10222	0.084628
	1.1398	0.0835172		1.02978	0.111861		1.10019	0.0842028
	1.1373	0.083038		1.02719	0.110877		1.09821	0.083819
	1.13471	0.0825242		1.02462	0.109906		1.09636	0.0834854
	1.132	0.0819792		1.02206	0.108949		1.09466	0.0831934
	1.12921	0.0814109		1.0195	0.108003		1.09316	0.0829435
	1.12645	0.0808558		1.01694	0.107044		1.09183	0.0827339
	1.12368	0.0803047		1.01435	0.106071		1.09064	0.0825546
	1.12091	0.0797577		1.01173	0.10509		1.08959	0.0824202
	1.1181	0.0791885		1.00907	0.104106		1.0887	0.082324
	1.11528	0.0786064		1.00649	0.103151		1.088	0.0822639
	1.11248	0.078021		1.00379	0.102193		1.0875	0.0822235
	1.10971	0.0774372		1.00102	0.101236		1.0872	0.0821986
	1.10696	0.0768445		0.998175	0.100284		1.08715	0.0821996
	1.10423	0.0762545		0.995341	0.0993438		1.08712	0.0821838
	1.10156	0.0756842		0.992507	0.098405		1.08724	0.0821669
	1.099	0.0751485		0.989608	0.0974545		1.08748	0.0821528
	1.09649	0.0746355		0.98663	0.0964896		1.08785	0.0821521
	1.09403	0.074149		0.983553	0.0955138		1.08826	0.0821495
	1.09172	0.0737171		0.980426	0.0945343		1.08861	0.0821277
	1.08948	0.0733218		0.97733	0.0935639		1.08891	0.0820811
	1.0873	0.0729471		0.97423	0.0926003		1.08908	0.0819883
	1.0852	0.0726021		0.971159	0.0916472		1.08914	0.0818518
	1.08315	0.07227		0.968217	0.0907164		1.08912	0.0816629
	1.0811	0.0719388		0.965416	0.0898091		1.08903	0.081427
	1.07903	0.0716117		0.962695	0.0889177		1.08888	0.0811453
	1.07696	0.0712876		0.960099	0.0880557		1.08865	0.0808236
	1.0749	0.070965		0.957595	0.0872225		1.0883	0.0804644
	1.0729	0.070629		0.955249	0.086425		1.08786	0.0800798
	1.07093	0.0702677		0.953149	0.0856627		1.08731	0.0796632
	1.06894	0.0698801		0.951146	0.0849215		1.08673	0.0792107
	1.06691	0.0694671		0.949278	0.08422		1.08608	0.0787227
	1.06491	0.0690393		0.947469	0.0835505		1.08537	0.0782047
	1.06295	0.0686055		0.945606	0.0828955		1.08463	0.0776594
	1.06097	0.0681661		0.943772	0.0822615		1.08387	0.077102
	1.05901	0.0677264		0.941966	0.0816546		1.08309	0.0765345
	1.05715	0.0672955		0.940156	0.0810561		1.08225	0.0759512
	1.05522	0.0668377		0.938299	0.080448		1.08133	0.0753531
	1.05327	0.0663589		0.936301	0.0798251		1.08033	0.0747414
	1.05126	0.0658661		0.934387	0.0791992		1.07932	0.0741287
	1.04921	0.0653655		0.932511	0.0785715		1.07832	0.0735247
	1.04721	0.0648611		0.930618	0.0779379		1.07725	0.0729301
	1.04534	0.064357		0.928727	0.0772978		1.07616	0.0723449
	1.04363	0.0638648		0.926915	0.0766595		1.07505	0.0717728
	1.04203	0.0633928		0.925092	0.0760237		1.07384	0.0712074
	1.04051	0.0629386		0.923226	0.0753973		1.07253	0.0706482
	1.03907	0.062496		0.921316	0.0747821		1.07112	0.0700973
	1.03774	0.0620801		0.919497	0.0741838		1.06965	0.0695649
	1.03657	0.0616953		0.917713	0.0736003		1.06816	0.0690426
	1.03548	0.0613346		0.915948	0.0730373		1.06663	0.0685323
	1.03451	0.0609985		0.914255	0.0725033		1.06506	0.0680327
	1.03361	0.0606837		0.91267	0.071982		1.06344	0.0675526
	1.03268	0.0603838		0.911215	0.0714752		1.06178	0.0670875
	1.03174	0.0600958		0.909865	0.0709898		1.06013	0.0666363
	1.03075	0.0598185		0.90866	0.0705143		1.05843	0.0661975
	1.02982	0.0595717		0.907554	0.070064		1.0568	0.065773
	1.02894	0.0593539		0.906498	0.0696287		1.05519	0.0653665
	1.02808	0.0591546		0.905477	0.0692053		1.05362	0.0649599
	1.02723	0.0589706		0.90449	0.0688014		1.05206	0.0645761
	1.02648	0.0588198		0.903556	0.0684145		1.05052	0.0642132
	1.02569	0.0586781		0.902771	0.0680316		1.04907	0.0638665
	1.0249	0.0585522		0.901984	0.0676514		1.04769	0.0635292
	1.02418	0.0584514		0.901124	0.067286		1.04634	0.063203
	1.02341	0.0583573		0.900266	0.0669394		1.04501	0.0628926
	1.02273	0.0583059		0.899366	0.0666083		1.04371	0.0625772
	1.02219	0.0583015		0.898411	0.0662942		1.04241	0.062283
	1.02175	0.0583432		0.897369	0.0659914		1.04112	0.0620115
	1.02134	0.058413		0.896306	0.0656993		1.03991	0.061771
	1.02097	0.0585115		0.895188	0.0654153		1.0388	0.0615521
	1.02074	0.0586573		0.893957	0.0651329		1.03767	0.0613461
	1.02071	0.0588569		0.892659	0.0648553		1.0365	0.0611514
	1.02078	0.0590931		0.891347	0.064587		1.03521	0.0609449
	1.02088	0.0593614		0.890033	0.0643259		1.0338	0.0607274
	1.021	0.0596561		0.888727	0.0640685		1.03235	0.0604993
	1.02111	0.0599663		0.88752	0.0638179		1.03083	0.0602627
	1.0212	0.0602857		0.886314	0.0635715		1.02929	0.0600193
	1.02135	0.0606266		0.885157	0.0633349		1.02775	0.0597736
	1.0216	0.0609975		0.884047	0.0631083		1.02623	0.0595269
	1.02188	0.0613802		0.882971	0.0628962		1.02478	0.0592889
	1.02216	0.061762		0.881986	0.0627001		1.02343	0.0590491
	1.02241	0.0621308		0.881076	0.0625213		1.02216	0.0588055
	1.02261	0.0624826		0.880294	0.0623541		1.02087	0.0585673
	1.02284	0.0628296		0.879659	0.0621999		1.01957	0.0583367
	1.02314	0.063192		0.879112	0.0620497		1.01826	0.0581105
	1.02344	0.063554		0.878622	0.0618998		1.01697	0.0579009
	1.02376	0.0639269		0.878128	0.0617602		1.01572	0.0577049
	1.0241	0.0643075		0.87767	0.0616318		1.01448	0.0575217
	1.02442	0.0646865		0.877231	0.0615136		1.01324	0.0573555
	1.02473	0.06506		0.876726	0.0614034		1.01201	0.0572008
	1.02505	0.0654425		0.876234	0.0612933		1.01086	0.057061
	1.0255	0.065864		0.875676	0.0611788		1.00983	0.056947
	1.02607	0.0663071		0.875125	0.0610612		1.00889	0.0568608
	1.02677	0.0667753		0.874534	0.0609344		1.00804	0.056804
	1.02755	0.0672419		0.873881	0.0607977		1.00728	0.0567757
	1.02834	0.0677052		0.873196	0.0606557		1.00659	0.0567777
	1.02918	0.0681793		0.872453	0.0605089		1.00597	0.0568107
	1.03009	0.0686705		0.871628	0.0603542		1.00538	0.0568759
	1.03099	0.0691521		0.870868	0.0601987		1.00483	0.0569771
	1.03193	0.0696441		0.870108	0.0600398		1.00436	0.0571036
	1.03284	0.0701221		0.869372	0.0598774		1.004	0.0572675
	1.03382	0.0706046		0.868653	0.0597098		1.0037	0.057472
	1.03481	0.0710605		0.867992	0.0595371		1.00347	0.0577199
	1.03577	0.0714813		0.867397	0.0593573		1.00334	0.0580101
	1.03667	0.0718716		0.866881	0.059161		1.00331	0.0583367
	1.03751	0.0722304		0.866491	0.058957		1.00326	0.0586785
	1.03836	0.0725756		0.866229	0.0587647		1.00327	0.0590379
	1.03922	0.0729115		0.866073	0.0585857		1.0033	0.0594172
	1.04002	0.0732133		0.865959	0.0584148		1.00337	0.0597969
	1.04082	0.0734914		0.86589	0.0582518		1.00347	0.060182
	1.04177	0.0737899		0.865844	0.0580955		1.00357	0.060573
	1.04276	0.0740729		0.865731	0.057928		1.00372	0.0609499
	1.04376	0.0743366		0.86559	0.05775		1.00386	0.0613162
	1.04478	0.0745854		0.865336	0.0575643		1.00401	0.0616704
	1.04569	0.0747737		0.865058	0.0573739		1.00414	0.0620215
	1.04666	0.0749583		0.864679	0.0571816		1.00437	0.0623637
	1.04767	0.0751353		0.8642	0.0569883		1.00456	0.0627039
	1.04858	0.0752696		0.863641	0.0567978		1.00472	0.0630437
	1.04931	0.0753487		0.863047	0.0566134		1.0049	0.0633697
	1.0499	0.0753759		0.862405	0.0564355		1.00518	0.0636643
	1.0504	0.0753822		0.861671	0.0562645		1.00545	0.0639473
	1.05088	0.0753903		0.860859	0.0560851		1.00568	0.0642209
	1.05133	0.0753895		0.860079	0.055895		1.00584	0.0644877
	1.05168	0.0753647		0.859399	0.0556946		1.00596	0.06474
	1.0519	0.0753009		0.858631	0.0554932		1.00611	0.0649808
	1.052	0.0752063		0.857817	0.0553053		1.00627	0.0652109
	1.05199	0.0750878		0.856981	0.055132		1.00642	0.0654295
	1.05186	0.0749451		0.856106	0.0549712		1.00657	0.0656409
	1.05161	0.0747728		0.855216	0.0548203		1.00668	0.0658236
	1.05128	0.0745744		0.854305	0.054678		1.00675	0.0659801
	1.05084	0.0743349		0.853378	0.0545459		1.00684	0.0661039
	1.05027	0.074054		0.852523	0.0544036		1.00688	0.0661964
	1.04958	0.0737343		0.85167	0.0542568		1.00683	0.0662611
	1.04879	0.0733807		0.850826	0.0541162		1.00664	0.0662961
	1.0479	0.073		0.849995	0.0539881		1.00629	0.0663011
	1.04687	0.0725965		0.849222	0.0538716		1.00582	0.0662779
	1.04565	0.0721663		0.848499	0.0537664		1.00522	0.0662235
	1.0443	0.0717125		0.84796	0.0536571		1.00448	0.0661388
	1.0429	0.0712548		0.847505	0.0535534		1.00361	0.0660219
	1.0414	0.070771		0.847082	0.0534603		1.00265	0.0658656
	1.03988	0.0702786		0.846719	0.053359		1.00164	0.0656692
	1.03839	0.0697951		0.846338	0.053262		1.00058	0.0654405
	1.03696	0.0693107		0.84605	0.0531585		0.999547	0.0651839
	1.03565	0.0688408		0.84581	0.0530524		0.998561	0.0649053
	1.03439	0.0683703		0.845714	0.0529314		0.997609	0.0646135
	1.03321	0.0679031		0.845668	0.0528079		0.996701	0.0643132
	1.03214	0.0674697		0.845602	0.0526893		0.995839	0.064009
	1.03113	0.0670592		0.845514	0.0525782		0.994984	0.0637057
	1.03011	0.066667		0.845449	0.0524675		0.994171	0.0634047
	1.02902	0.0662736		0.845432	0.0523599		0.993336	0.0631119
	1.02784	0.0658773		0.845418	0.0522539		0.992516	0.0628414
	1.02665	0.0654839		0.845413	0.052145		0.991676	0.0625808
	1.02541	0.0650799		0.845506	0.0520331		0.99083	0.0623283
	1.02415	0.0646659		0.845675	0.0519235		0.989989	0.0620836
	1.02288	0.0642478		0.845839	0.0518189		0.989145	0.0618453
	1.02156	0.0638254		0.846018	0.0517216		0.988237	0.0615902
	1.02026	0.0634171		0.846268	0.0516341		0.987289	0.0613247
	1.01891	0.0630034		0.846584	0.0515436		0.986313	0.0610501
	1.01755	0.0625856		0.84695	0.0514458		0.985278	0.0607665
	1.01623	0.0621721		0.847404	0.0513476		0.984197	0.0604744
	1.01499	0.0617686		0.847976	0.0512406		0.983088	0.0601735
	1.01387	0.0613824		0.848542	0.0511346		0.982046	0.0598633
	1.01288	0.0610033		0.849098	0.0510219		0.981081	0.059543
	1.0119	0.0606162		0.849617	0.0509098		0.98019	0.0592172
	1.01089	0.060214		0.850069	0.0508001		0.979327	0.058898
	1.01	0.0598243		0.850506	0.0506958		0.978574	0.0585888
	1.00908	0.0594273		0.850957	0.0505999		0.97789	0.0582885
	1.0082	0.0590276		0.851418	0.0505067		0.977342	0.0579978
	1.00724	0.0586111		0.851892	0.0504338		0.976944	0.0577105
	1.00631	0.0582198		0.852361	0.0503767		0.976677	0.0574234
	1.00539	0.057858		0.852826	0.0503353		0.976462	0.0571415
	1.00448	0.0575195		0.853244	0.050298		0.976316	0.0568673
	1.00362	0.0572088		0.853644	0.0502576		0.976237	0.0566049
	1.00279	0.0569229		0.854052	0.0502139		0.976321	0.05636
	1.00196	0.0566373		0.854532	0.0501656		0.976644	0.056131
	1.0012	0.0563619		0.855078	0.0501364		0.977086	0.0559209
	1.00051	0.0560977		0.855603	0.0501096		0.977654	0.0557109
	0.999988	0.0558546		0.856109	0.0500875		0.978374	0.055524
	0.999534	0.0556169		0.856539	0.0500694		0.979139	0.0553574
	0.999236	0.055402		0.856861	0.0500566		0.979969	0.055216
	0.998954	0.055195		0.857074	0.0500486		0.98085	0.0550981
	0.998656	0.0549879		0.857285	0.0500306		0.981759	0.0550038
	0.99838	0.0547893		0.857398	0.0500128		0.982736	0.0549171
	0.998138	0.0546012		0.857478	0.0499999		0.983753	0.0548433
	0.997987	0.0544385		0.857513	0.0499987		0.98474	0.0547829
	0.997797	0.054284		0.857522	0.0500178		0.985665	0.0547307
	0.997583	0.0541412		0.8575	0.0500407		0.986539	0.0546888
	0.99741	0.0540157		0.857538	0.0500549		0.987376	0.0546591
	0.997376	0.0539469		0.857554	0.050064		0.988175	0.0546361
	0.997422	0.0539276		0.857541	0.0500688		0.988955	0.0546172
	0.997405	0.0539246		0.85757	0.0500603		0.989736	0.0546033
	0.997318	0.0539347		0.857621	0.050043		0.990532	0.0546049
	0.997141	0.0539349		0.857648	0.0500263		0.991422	0.0546253
	0.997064	0.0539784		0.857613	0.0500132		0.992456	0.0546684
	0.997149	0.0540731		0.857708	0.0499911		0.99357	0.0547375
	0.997268	0.0541847		0.857704	0.0499762		0.99475	0.0548369
	0.997433	0.054323		0.857622	0.0499714		0.995885	0.0549526
	0.997566	0.0544583		0.857473	0.0499771		0.996892	0.0550805
	0.997712	0.054602		0.857274	0.0499903		0.997849	0.0552216
	0.997773	0.0547342		0.857075	0.0500127		0.998701	0.0553724
	0.997709	0.0548377		0.856911	0.0500359		0.99942	0.0555278
	0.997487	0.0548983		0.856796	0.0500601		1.00001	0.055681
	0.997185	0.0549256		0.856784	0.050093		1.00047	0.055832
	0.996924	0.0549537		0.856824	0.050138		1.00077	0.0559799
	0.996682	0.0549802		0.856824	0.0501971		1.00093	0.0561261
	0.996381	0.0549731		0.856822	0.0502707		1.00091	0.0562688
	0.996122	0.0549732		0.856823	0.0503593		1.00077	0.0564108
	0.995831	0.0549614		0.856805	0.0504602		1.00052	0.0565527
	0.995523	0.0549457		0.85682	0.0505856		1.00011	0.0566922
	0.995265	0.0549516		0.856836	0.0507334		0.999563	0.0568302
	0.994998	0.0549671		0.856901	0.050888		0.998841	0.0569645
	0.99463	0.054981		0.856952	0.0510609		0.998012	0.0570944
	0.994165	0.0549866		0.856971	0.0512327		0.997152	0.0572185
	0.993593	0.0549728		0.856941	0.0514026		0.996232	0.0573371
	0.992921	0.0549438		0.856831	0.0515757		0.995243	0.057447
	0.992297	0.0549491		0.856658	0.0517497		0.994159	0.0575488
	0.991519	0.0549325		0.856425	0.0519201		0.992985	0.0576513
	0.990753	0.0549455		0.856142	0.0520851		0.991856	0.0577619
	0.989845	0.0549531		0.855842	0.0522424		0.990719	0.0578792
	0.988856	0.0549587		0.855432	0.0524003		0.989546	0.0580068
	0.987833	0.0549862		0.854939	0.0525587		0.988288	0.0581391
	0.986819	0.0550355		0.854409	0.0527212		0.986942	0.0582768
	0.98582	0.0551044		0.853833	0.0528891		0.985553	0.0584268
	0.98481	0.0551857		0.853193	0.0530666		0.98414	0.0585852
	0.983727	0.0552777		0.85248	0.0532387		0.98273	0.0587502
	0.982609	0.0553874		0.851639	0.0534194		0.981253	0.0589196
	0.981531	0.0555273		0.850763	0.0535967		0.97973	0.0590838
	0.980542	0.0556987		0.849837	0.0537669		0.978172	0.0592505
	0.979676	0.055905		0.848816	0.0539361		0.976573	0.0594227
	0.978866	0.0561264		0.847647	0.0541109		0.974927	0.0596001
	0.978036	0.0563487		0.846323	0.0542918		0.973236	0.0597828
	0.97715	0.0565674		0.844834	0.0544793		0.971505	0.0599772
	0.976217	0.0567796		0.843196	0.0546757		0.969806	0.0601663
	0.975257	0.056991		0.841483	0.0548868		0.968213	0.06037
	0.974323	0.0572147		0.839753	0.0551095		0.966699	0.0605924
	0.973336	0.0574412		0.838028	0.0553423		0.965197	0.0608274
	0.972277	0.05767		0.836333	0.0555815		0.963788	0.061074
	0.971185	0.0579076		0.834695	0.0558211		0.962457	0.0613297
	0.970109	0.058148		0.833084	0.056058		0.961169	0.0615943
	0.969101	0.058393		0.831479	0.0562908		0.959907	0.0618649
	0.967996	0.0586267		0.830043	0.0565033		0.958603	0.0621343
	0.966857	0.0588481		0.828672	0.0567033		0.957326	0.0624209
	0.965705	0.0590612		0.827316	0.0569054		0.956128	0.0627234
	0.964658	0.0592731		0.82591	0.0571148		0.955024	0.0630376
	0.963738	0.0594845		0.824558	0.0573212		0.953975	0.0633637
	0.96288	0.0596918		0.823299	0.0575136		0.952985	0.0636995
	0.961983	0.0598939		0.822077	0.0577053		0.951919	0.0640345
	0.961069	0.0600916		0.820929	0.0578917		0.950742	0.0643708
	0.96019	0.0602889		0.819863	0.0580714		0.949505	0.0647088
	0.959279	0.0604866		0.818886	0.0582442		0.948243	0.0650414
	0.958372	0.0606779		0.818059	0.0583874		0.946897	0.0653682
	0.957466	0.0608609		0.81731	0.0585111		0.945473	0.0656894
	0.956703	0.0610329		0.816745	0.0586092		0.943992	0.0660065
	0.95621	0.0611982		0.816369	0.0586827		0.942414	0.0663193
	0.955905	0.0613519		0.816038	0.0587536		0.940742	0.0666274
	0.955765	0.0614932		0.815726	0.0588249		0.938941	0.0669298
	0.95574	0.0616218		0.815412	0.0588968		0.937036	0.0672267
	0.956032	0.0617464		0.815165	0.0589706		0.93503	0.0675164
	0.956462	0.0618558		0.815026	0.0590536		0.932972	0.067798
	0.957035	0.0619585		0.814996	0.0591412		0.930846	0.0680735
	0.957724	0.0620517		0.815036	0.0592296		0.928625	0.0683461
	0.958382	0.0621245		0.815142	0.0593144		0.926295	0.0686125
	0.958975	0.0621786		0.815271	0.0593865		0.92392	0.068867
	0.95952	0.0622103		0.815432	0.0594437		0.92153	0.0691084
	0.960024	0.0622187		0.815599	0.0594935		0.91914	0.0693356
	0.96058	0.0622259		0.81579	0.0595369		0.916705	0.0695569
	0.961221	0.0622398		0.816015	0.0595761		0.914228	0.069776
	0.961907	0.0622525		0.816264	0.0596148		0.911789	0.0699848
	0.962549	0.0622582		0.81661	0.0596428		0.909363	0.0701888
	0.963116	0.0622512		0.817058	0.0596613		0.907004	0.070392
	0.963622	0.0622436		0.817494	0.0596766		0.904764	0.0706002
	0.964181	0.062251		0.817922	0.0596874		0.902653	0.0708082
	0.964789	0.0622692		0.818298	0.0596948		0.900685	0.0710252
	0.965313	0.062286		0.818609	0.0597014		0.898807	0.0712494
	0.965765	0.0622978		0.818846	0.0597097		0.896979	0.0714743
	0.96613	0.0623045		0.819054	0.0597151		0.895248	0.071702
	0.966492	0.0623237		0.819131	0.0597124		0.893622	0.0719357
	0.966794	0.0623423		0.819075	0.0597016		0.892047	0.0721763
	0.967102	0.0623793		0.818923	0.0596869		0.890545	0.0724251
	0.967367	0.0624163		0.818628	0.0596681		0.889131	0.0726756
	0.967556	0.0624455		0.818206	0.0596446		0.88767	0.0729246
	0.967684	0.0624719		0.817668	0.0596107		0.886178	0.0731758
	0.967764	0.062497		0.816994	0.0595732		0.88475	0.073425
	0.967845	0.0625221		0.816173	0.0595315		0.883414	0.0736817
	0.96792	0.062549		0.815312	0.059484		0.882198	0.0739457
	0.967961	0.0625758		0.814393	0.0594272		0.881066	0.0742191
	0.967937	0.0625963		0.813359	0.0593692		0.880052	0.0744992
	0.967856	0.062601		0.812249	0.0593067		0.879121	0.0747862
	0.967721	0.0626092		0.810982	0.0592372		0.878253	0.0750791
	0.967445	0.0625953		0.809526	0.0591609		0.877432	0.0753769
	0.967044	0.062563		0.807999	0.0590801		0.876625	0.0756719
	0.966552	0.0625228		0.806367	0.0590061		0.875832	0.0759643
	0.965982	0.0624773		0.804687	0.0589468		0.875044	0.0762534
	0.965318	0.0624249		0.803037	0.0589017		0.874264	0.0765365
	0.964655	0.0623817		0.801584	0.0588696		0.87349	0.0768125
	0.963921	0.0623343		0.800259	0.0588335		0.87271	0.07708
	0.963141	0.0622999		0.799102	0.058798		0.871877	0.07734
	0.962245	0.0622653		0.797972	0.0587678		0.871074	0.0775962
	0.961307	0.0622521		0.796882	0.0587394		0.870283	0.0778457
	0.960321	0.0622617		0.795825	0.058711		0.8695	0.078087
	0.959361	0.0622987		0.794847	0.0586778		0.86869	0.078316
	0.958313	0.0623339		0.793909	0.0586365		0.867838	0.0785304
	0.957268	0.0623878		0.792916	0.0585882		0.866986	0.0787319
	0.956187	0.0624381		0.791852	0.0585326		0.866067	0.0789183
	0.954981	0.0624653		0.79071	0.058473		0.86509	0.0790883
	0.953734	0.0624843		0.789433	0.05841		0.864071	0.0792433
	0.952412	0.0624889		0.788	0.0583423		0.863044	0.0793852
	0.951245	0.0625339		0.786445	0.0582703		0.861971	0.079514
	0.950066	0.0625786		0.784828	0.058191		0.8609	0.0796329
	0.948785	0.0626115		0.783185	0.0581082		0.859827	0.0797388
	0.94742	0.0626369		0.781532	0.0580222		0.858739	0.0798321
	0.945961	0.0626486		0.779885	0.0579308		0.857544	0.0799098
	0.944428	0.0626462		0.778235	0.0578354		0.856271	0.0799722
	0.942807	0.0626247		0.776607	0.0577365		0.854939	0.0800195
	0.941231	0.0626095		0.774962	0.0576387		0.853572	0.0800574
	0.939697	0.0625981		0.773298	0.057542		0.85216	0.0800879
	0.938302	0.0626127		0.771642	0.0574564		0.85072	0.0801127
	0.936956	0.0626346		0.76998	0.0573903		0.849285	0.0801292
	0.935566	0.0626552		0.768307	0.0573407		0.847839	0.0801386
	0.934123	0.0626705		0.766727	0.0573057		0.846434	0.0801435
	0.932703	0.0627022		0.765166	0.0572886		0.845113	0.0801475
	0.931374	0.0627646		0.763626	0.0572903		0.843909	0.0801477
	0.930053	0.0628393		0.762071	0.0573109		0.842792	0.0801449
	0.928641	0.0629098		0.760495	0.057351		0.841774	0.0801411
	0.92715	0.0629813		0.758858	0.0574086		0.840802	0.0801309
	0.925586	0.0630543		0.757157	0.0574826		0.839915	0.0801216
	0.923954	0.0631268		0.755435	0.0575696		0.839207	0.0801171
	0.922296	0.0632027		0.753657	0.057676		0.838591	0.080111
	0.920536	0.0632719		0.751825	0.0578089		0.838063	0.0801034
	0.918697	0.0633318		0.749941	0.0579688		0.837637	0.0800933
	0.916779	0.0633755		0.748014	0.0581594		0.837211	0.0800744
	0.914804	0.063411		0.746035	0.0583785		0.8368	0.0800499
	0.912798	0.0634368		0.744035	0.0586259		0.836476	0.0800228
	0.910861	0.0634641		0.742056	0.0588956		0.836254	0.0799941
	0.90899	0.063483		0.740211	0.0591712		0.83612	0.0799673
	0.907181	0.0634996		0.738411	0.059462		0.836039	0.0799427
	0.905331	0.0635107		0.736643	0.0597716		0.835978	0.0799158
	0.903482	0.0635183		0.734992	0.0600926		0.835884	0.0798853
	0.901769	0.0635245		0.733373	0.060426		0.835803	0.0798539
	0.9	0.0635139		0.731787	0.0607737		0.83572	0.0798214
	0.89818	0.0634941		0.73026	0.0611299		0.83564	0.0797858
	0.896289	0.0634675		0.728788	0.0615041		0.835545	0.0797472
	0.894343	0.063429		0.727436	0.0618896		0.835418	0.0797065
	0.892324	0.0633842		0.726299	0.0622669		0.835286	0.0796636
	0.890334	0.0633419		0.725327	0.06264		0.835133	0.0796177
	0.888312	0.0633005		0.724441	0.0630178		0.834901	0.0795724
	0.886355	0.0632649		0.723765	0.0633833		0.834592	0.0795331
	0.884401	0.0632332		0.72313	0.0637637		0.834333	0.0795019
	0.882527	0.0632088		0.722547	0.0641531		0.834088	0.0794804
	0.880741	0.0631915		0.721968	0.0645573		0.833802	0.0794705
	0.879058	0.0631816		0.721361	0.0649786		0.833488	0.0794715
	0.877418	0.0631748		0.720826	0.0654151		0.833153	0.0794849
	0.875868	0.0631693		0.720332	0.0658654		0.83282	0.0795056
	0.874339	0.0631591		0.719838	0.0663199		0.832451	0.0795342
	0.872829	0.0631446		0.719373	0.0667791		0.832043	0.0795728
	0.871324	0.0631325		0.718897	0.0672471		0.831673	0.0796223
	0.869851	0.0631247		0.718398	0.0677243		0.831393	0.0796823
	0.868572	0.0631138		0.717999	0.0682027		0.831151	0.0797549
	0.867443	0.0631044		0.717656	0.0686859		0.830953	0.0798463
	0.866334	0.0630948		0.717402	0.0691756		0.830841	0.0799549
	0.865302	0.0630848		0.717212	0.0696701		0.830787	0.0800761
	0.86438	0.0630796		0.717059	0.0701707		0.830749	0.0802137
	0.86352	0.0630871		0.716905	0.0706855		0.830753	0.0803652
	0.862644	0.0631076		0.716761	0.0712181		0.83085	0.0805204
	0.861905	0.0631427		0.716614	0.0717657		0.831023	0.0806819
	0.861324	0.0631953		0.716445	0.072327		0.831193	0.0808561
	0.860854	0.0632697		0.716267	0.0729065		0.831388	0.0810448
	0.860497	0.0633644		0.71611	0.0735028		0.831597	0.0812483
	0.860226	0.063481		0.715941	0.0741134		0.831957	0.0814605
	0.860015	0.0636218		0.715741	0.0747378		0.83243	0.0816756
	0.859952	0.0637849		0.715526	0.0753791		0.832956	0.0818958
	0.86003	0.0639712		0.715279	0.0760336		0.833491	0.0821173
	0.860213	0.0641789		0.715008	0.0767046		0.834009	0.0823474
	0.860529	0.0644118		0.714673	0.0773883		0.834521	0.0825899
	0.860982	0.0646772		0.714267	0.078086		0.83506	0.082845
	0.861482	0.0649772		0.713804	0.0787965		0.83568	0.0831088
	0.861968	0.0653157		0.713285	0.0795176		0.836488	0.08338
	0.862446	0.0656959		0.712732	0.0802551		0.837313	0.0836603
	0.862874	0.066115		0.712154	0.0810107		0.838089	0.0839486
	0.863261	0.0665684		0.711537	0.0817848		0.838803	0.0842409
	0.863613	0.0670569		0.710907	0.0825784		0.839414	0.0845384
	0.86398	0.0675857		0.710315	0.0833843		0.839956	0.0848434
	0.864364	0.0681553		0.709703	0.0842089		0.840378	0.0851563
	0.864814	0.0687698		0.709154	0.085045		0.840758	0.0854681
	0.865317	0.0694197		0.708674	0.0858934		0.841046	0.0857842
	0.865911	0.0701124		0.708182	0.0867595		0.841219	0.0861098
	0.866521	0.0708642		0.707671	0.0876437		0.841279	0.0864447
	0.867213	0.0716837		0.70715	0.0885452		0.841203	0.0867893
	0.867946	0.0725697		0.70662	0.0894638		0.84104	0.0871422
	0.868676	0.0735039		0.706112	0.0903972		0.840781	0.0875072
	0.869368	0.0744824		0.70561	0.0913416		0.840442	0.0878769
	0.870021	0.0755021		0.705129	0.0922995		0.839977	0.088255
	0.870694	0.0765708		0.704747	0.0932562		0.839413	0.088638
	0.871326	0.0776823		0.704466	0.0942067		0.838769	0.0890227
	0.871913	0.0788384		0.704232	0.0951602		0.837941	0.0894097
	0.87242	0.0800355		0.704005	0.0961158		0.836859	0.0897999
	0.872853	0.0812697		0.703809	0.0970653		0.835542	0.0901952
	0.873194	0.082546		0.703588	0.0980141		0.834109	0.0905938
	0.873496	0.0838649		0.703368	0.0989549		0.832523	0.0910005
	0.873785	0.0852175		0.703111	0.0998893		0.830762	0.091419
	0.874023	0.0865996		0.702784	0.100816		0.828834	0.0918505
	0.874211	0.0880162		0.702382	0.101744		0.826751	0.0922996
	0.874346	0.0894645		0.701899	0.102671		0.824503	0.0927634
	0.874418	0.090941		0.701321	0.103595		0.822171	0.0932368
	0.874455	0.0924395		0.700645	0.104512		0.819695	0.0937221
	0.874467	0.0939575		0.699892	0.105422		0.817142	0.094216
	0.874506	0.0955027		0.699045	0.106322		0.814554	0.0947247
	0.874617	0.0970771		0.698202	0.107196		0.811918	0.0952492
	0.874666	0.0986665		0.69731	0.108048		0.809237	0.0957852
	0.87453	0.100263		0.696373	0.108875		0.806546	0.0963362
	0.874226	0.101867		0.695371	0.109672		0.803771	0.0969034
	0.873811	0.103474		0.694303	0.110438		0.800929	0.0974891
	0.8733	0.105077		0.693105	0.111182		0.798018	0.0980915
	0.872617	0.106674		0.691797	0.111907		0.795083	0.0987115
	0.871765	0.10826		0.690359	0.112608		0.792089	0.099351
	0.870824	0.109836		0.68877	0.113281		0.789004	0.100014
	0.869738	0.111397		0.687073	0.113927		0.785847	0.100704
	0.868484	0.112941		0.685283	0.114546		0.78261	0.101419
	0.867091	0.114466		0.683384	0.115135		0.779432	0.102155
	0.865528	0.115967		0.681374	0.115693		0.776323	0.102902
	0.863845	0.117442		0.679327	0.116223		0.773247	0.103662
	0.862017	0.118888		0.677227	0.116721		0.770146	0.104437
	0.86008	0.120303		0.675082	0.117191		0.767088	0.105228
	0.858074	0.121685		0.672866	0.117629		0.76404	0.106037
	0.856003	0.123031		0.670576	0.118034		0.761056	0.106863
	0.853793	0.124343		0.668227	0.118405		0.758195	0.107698
	0.85139	0.125617		0.665763	0.11874		0.755486	0.108539
	0.848783	0.126851		0.66321	0.119041		0.752839	0.109385
	0.846101	0.12804		0.660577	0.119306		0.750254	0.110232
	0.843281	0.129178		0.657863	0.119536		0.747708	0.111077
	0.840349	0.130264		0.655066	0.119731		0.745146	0.111921
	0.837343	0.131301		0.652212	0.119892		0.742596	0.112766
	0.834276	0.132287		0.649292	0.120021		0.739999	0.11361
	0.83111	0.133223		0.646311	0.120118		0.737372	0.114444
	0.827935	0.134101		0.643307	0.120188		0.734676	0.115267
	0.824625	0.134926		0.640281	0.12023		0.731891	0.116075
	0.82121	0.135698		0.637238	0.120243		0.729019	0.116866
	0.817735	0.136417		0.634203	0.120227		0.726085	0.117637
	0.814141	0.137085		0.631153	0.120179		0.723084	0.118384
	0.810482	0.137705		0.628116	0.1201		0.72001	0.119108
	0.806722	0.138276		0.625069	0.119989		0.716898	0.119801
	0.802866	0.138798		0.621993	0.119849		0.713717	0.120466
	0.799053	0.139262		0.61892	0.119674		0.710505	0.121097
	0.795246	0.13967		0.615865	0.119465		0.70729	0.12169
	0.791473	0.14002		0.61281	0.119226		0.703973	0.122251
	0.78762	0.140319		0.60975	0.118959		0.700533	0.122778
	0.78372	0.140564		0.606705	0.118663		0.69699	0.123269
	0.779729	0.140757		0.603674	0.118341		0.693405	0.12372
	0.775668	0.140898		0.600655	0.117994		0.689726	0.124135
	0.771558	0.140988		0.597655	0.117623		0.685973	0.124511
	0.767416	0.141027		0.594679	0.117231		0.682159	0.124849
	0.763229	0.14102		0.591726	0.116819		0.678281	0.12515
	0.758967	0.140965		0.588806	0.116389		0.674348	0.125413
	0.75466	0.140861		0.585963	0.115942		0.670415	0.125629
	0.750309	0.14071		0.583191	0.11548		0.666457	0.125802
	0.745926	0.140512		0.580573	0.114989		0.662484	0.125931
	0.741581	0.140263		0.577992	0.114486		0.658546	0.126018
	0.737277	0.139963		0.575445	0.113972		0.65466	0.126062
	0.732934	0.139617		0.572914	0.113446		0.650826	0.126061
	0.728545	0.139224		0.570381	0.112908		0.647071	0.126016
	0.724108	0.138788		0.567878	0.112359		0.643411	0.125927
	0.719651	0.138306		0.565393	0.111799		0.639813	0.125798
	0.71519	0.137782		0.562933	0.111226		0.636237	0.125628
	0.710712	0.13722		0.560524	0.110643		0.632678	0.125417
	0.706218	0.136622		0.558106	0.110051		0.629127	0.125165
	0.701696	0.135989		0.555665	0.10945		0.625593	0.124872
	0.697161	0.135322		0.5532	0.108841		0.622006	0.124542
	0.692593	0.134624		0.550719	0.108225		0.618391	0.124175
	0.68802	0.133898		0.548223	0.107601		0.614746	0.123769
	0.683431	0.133145		0.545718	0.106972		0.611107	0.123328
	0.678852	0.132365		0.54325	0.10634		0.607475	0.12285
	0.674261	0.131558		0.54082	0.105703		0.603841	0.122339
	0.669656	0.130726		0.538423	0.105064		0.600272	0.121789
	0.665048	0.12987		0.536075	0.104424		0.59674	0.121202
	0.660451	0.128994		0.533806	0.103781		0.593247	0.120582
	0.655895	0.128099		0.531628	0.103135		0.589784	0.119927
	0.651397	0.127189		0.529464	0.102489		0.586345	0.119236
	0.646887	0.126267		0.527305	0.10184		0.582949	0.118508
	0.642466	0.12533		0.525145	0.101189		0.579616	0.117743
	0.638053	0.124382		0.522986	0.100535		0.576301	0.116944
	0.633656	0.123429		0.520848	0.0998802		0.572991	0.116116
	0.629279	0.12247		0.518753	0.0992243		0.569721	0.11526
	0.62493	0.121507		0.516704	0.0985672		0.566488	0.114378
	0.62061	0.120543		0.51468	0.0979114		0.563288	0.11347
	0.616411	0.119569		0.512672	0.097259		0.560113	0.112534
	0.61222	0.118599		0.510674	0.0966117		0.556938	0.111567
	0.608025	0.117638		0.508681	0.0959685		0.553767	0.110565
	0.60383	0.116686		0.506684	0.0953279		0.55061	0.109527
	0.599654	0.115745		0.504666	0.0946887		0.547471	0.108453
	0.595526	0.114818		0.50263	0.0940508		0.544338	0.107343
	0.591433	0.113906		0.500558	0.0934141		0.541213	0.106199
	0.587386	0.113009		0.498471	0.0927813		0.53812	0.10502
	0.583426	0.112124		0.496371	0.092152		0.535012	0.103811
	0.579602	0.111243		0.494272	0.091526		0.531894	0.102577
	0.575951	0.11036		0.492204	0.0909015		0.528751	0.101317
	0.572353	0.109488		0.49018	0.0902771		0.525577	0.100035
	0.568847	0.108623		0.488165	0.0896553		0.52238	0.0987314
	0.56542	0.107772		0.486153	0.0890375		0.51917	0.0974137
	0.562086	0.106932		0.484152	0.0884239		0.515954	0.0960843
	0.558809	0.106109		0.482175	0.0878138		0.512737	0.0947454
	0.555573	0.105302		0.480229	0.0872075		0.509522	0.0933991
	0.552354	0.104516		0.478348	0.0865982		0.50631	0.0920467
	0.549151	0.10375		0.476539	0.0859867		0.503103	0.09069
	0.545957	0.103006		0.474765	0.0853818		0.499857	0.0893216
	0.542783	0.102285		0.473002	0.0847798		0.496595	0.0879469
	0.539645	0.101586		0.471308	0.0841657		0.493314	0.0865674
	0.536581	0.100906		0.469623	0.0835509		0.490047	0.0851897
	0.533561	0.100251		0.467948	0.0829355		0.486804	0.0838127
	0.530595	0.0996186		0.466281	0.0823198		0.483596	0.0824389
	0.527688	0.09901		0.464634	0.0817044		0.480432	0.08107
	0.524833	0.0984252		0.463026	0.0810916		0.477376	0.0797118
	0.522069	0.0978566		0.461454	0.0804804		0.474431	0.0783679
	0.519444	0.0973052		0.459876	0.0798708		0.471595	0.0770373
	0.516896	0.0967796		0.458319	0.0792668		0.468855	0.0757161
	0.514439	0.0962831		0.456768	0.0786696		0.466219	0.0744061
	0.512063	0.0958141		0.455234	0.0780806		0.46372	0.0731068
	0.509757	0.0953731		0.453712	0.0774991		0.46129	0.0718184
	0.507531	0.0949574		0.45218	0.0769214		0.458935	0.0705432
	0.505436	0.0945649		0.45064	0.076349		0.45666	0.0692853
	0.503469	0.0941953		0.449098	0.0757828		0.454477	0.0680471
	0.501654	0.0938468		0.44756	0.0752231		0.452385	0.0668307
	0.499985	0.0935174		0.446022	0.0746706		0.45041	0.0656414
	0.498404	0.0932101		0.444491	0.074126		0.448555	0.0644806
	0.496917	0.0929255		0.442979	0.0735897		0.446832	0.0633512
	0.495532	0.0926643		0.441488	0.0730626		0.445247	0.0622556
	0.494282	0.0924296		0.440025	0.0725468		0.443829	0.0612053
	0.493187	0.0922221		0.438589	0.0720401		0.442566	0.0602023
	0.492209	0.0920408		0.43718	0.0715439		0.441471	0.0592465
	0.491353	0.0918839		0.435824	0.0710532		0.440547	0.0583398
	0.490621	0.0917491		0.434509	0.0705705		0.439777	0.0574782
	0.490007	0.0916353		0.433218	0.070106		0.439142	0.0566562
	0.489504	0.0915395		0.431931	0.0696628		0.438654	0.0558795
	0.489102	0.0914608		0.430665	0.0692403		0.438311	0.0551509
	0.488829	0.0913965		0.429424	0.0688396		0.4381	0.0544659
	0.48868	0.0913463		0.428211	0.0684619		0.438014	0.0538233
	0.488625	0.0913093		0.427028	0.0681082		0.43805	0.0532245
	0.48869	0.091283		0.425858	0.0677773		0.438213	0.0526614
	0.488875	0.0912629		0.424716	0.0674631		0.438477	0.0521252
	0.48915	0.0912485		0.42361	0.0671661		0.438849	0.0516132
	0.489538	0.0912395		0.42255	0.0668864		0.43933	0.0511244
	0.490043	0.0912296		0.421497	0.0666257		0.439924	0.0506579
	0.490674	0.0912211		0.420483	0.0663873		0.440663	0.0502094
	0.491422	0.0912141		0.419509	0.0661708		0.441501	0.0497909
	0.492296	0.0912107		0.418579	0.0659756		0.442436	0.0494025
	0.493303	0.0912137		0.417722	0.0658029		0.443461	0.0490449
	0.494415	0.0912229		0.416914	0.0656541		0.444561	0.0487185
	0.495617	0.0912379		0.416154	0.0655269		0.445725	0.0484265
	0.496933	0.0912593		0.415435	0.06542		0.446936	0.0481712
	0.49836	0.0912864		0.414769	0.0653333		0.448197	0.0479547
	0.499871	0.0913171		0.414151	0.0652643		0.449506	0.0477781
	0.501453	0.0913495		0.413583	0.0652128		0.450861	0.0476416
	0.503118	0.0913807		0.413156	0.0651654		0.452273	0.047547
	0.504874	0.0914133		0.412862	0.0651246		0.453749	0.0474951
	0.506699	0.0914468		0.412667	0.0650993		0.455257	0.0474744
	0.508606	0.0914817		0.412586	0.0650904		0.456797	0.0474877
	0.510592	0.0915174		0.412643	0.0651033		0.458383	0.0475351
	0.512648	0.0915552		0.412838	0.0651389		0.460032	0.0476241
	0.514772	0.0915965		0.413151	0.0652007		0.461735	0.0477537
	0.516941	0.0916382		0.413594	0.0652905		0.463475	0.0479269
	0.519162	0.0916812		0.414142	0.0654096		0.465258	0.0481429
	0.521429	0.0917259		0.41477	0.0655605		0.467068	0.0483971
	0.523739	0.0917747		0.415481	0.0657425		0.46891	0.0486909
	0.526086	0.0918301		0.416294	0.0659593		0.470784	0.0490263
	0.528476	0.0918932		0.417216	0.0662109		0.472689	0.0494028
	0.530921	0.0919677		0.418226	0.0664946		0.47463	0.0498229
	0.533416	0.0920546		0.419315	0.0668133		0.476641	0.0502954
	0.536043	0.0921629		0.420473	0.0671683		0.47874	0.0508219
	0.538806	0.0922932		0.421688	0.0675593		0.480922	0.051403
	0.541706	0.0924494		0.422963	0.0679876		0.483209	0.0520437
	0.544746	0.0926343		0.424341	0.0684484		0.485598	0.052743
	0.547915	0.0928503		0.425807	0.0689425		0.4881	0.0535031
	0.551121	0.0930923		0.427361	0.0694705		0.490743	0.0543272
	0.554339	0.0933612		0.429019	0.0700329		0.49353	0.0552142
	0.55761	0.0936575		0.430777	0.0706286		0.496495	0.0561641
	0.560953	0.0939827		0.43263	0.0712617		0.49963	0.0571733
	0.56437	0.0943421		0.43458	0.0719315		0.502956	0.0582434
	0.567835	0.0947404		0.436593	0.072641		0.506441	0.0593706
	0.571334	0.0951801		0.438657	0.0733891		0.510064	0.0605485
	0.574846	0.0956622		0.440756	0.0741748		0.513817	0.0617731
	0.578379	0.0961871		0.442896	0.0749976		0.517706	0.0630424
	0.581947	0.0967565		0.445116	0.0758586		0.521728	0.0643493
	0.585543	0.0973707		0.447435	0.0767569		0.525876	0.0656906
	0.589172	0.0980296		0.44988	0.0776931		0.530152	0.0670636
	0.592819	0.0987331		0.452445	0.0786633		0.534549	0.0684649
	0.596499	0.0994793		0.455061	0.0796606		0.539062	0.0698903
	0.600169	0.100265		0.457739	0.0806816		0.543667	0.071333
	0.603837	0.101087		0.460472	0.0817232		0.548365	0.072789
	0.607532	0.101942		0.463226	0.0827807		0.553124	0.0742495
	0.611224	0.102826		0.465993	0.0838498		0.557937	0.0757094
	0.614963	0.103737		0.468758	0.0849262		0.562783	0.0771617
	0.618685	0.104667		0.471514	0.0860044		0.567677	0.0786034
	0.622387	0.105615		0.474273	0.0870804		0.572617	0.0800292
	0.626041	0.106577		0.477026	0.0881489		0.577596	0.0814337
	0.629688	0.107549		0.47976	0.0892073		0.582632	0.0828131
	0.633362	0.108527		0.482496	0.0902527		0.587726	0.084164
	0.637073	0.109504		0.485276	0.0912831		0.592868	0.0854812
	0.64082	0.110473		0.488069	0.0922916		0.598067	0.0867628
	0.644627	0.111429		0.490859	0.0932723		0.60329	0.0880045
	0.648569	0.112363		0.493653	0.0942181		0.608533	0.0892031
	0.652543	0.113272		0.496461	0.0951248		0.613791	0.0903556
	0.656522	0.114149		0.499279	0.0959883		0.619048	0.0914549
	0.660492	0.114987		0.502076	0.0968021		0.624311	0.0924956
	0.664509	0.115776		0.504852	0.0975617		0.62958	0.0934766
	0.668566	0.116513		0.507594	0.0982626		0.634856	0.0943955
	0.672676	0.117193		0.51032	0.0989033		0.640122	0.0952487
	0.676827	0.117809		0.513081	0.0994814		0.645387	0.0960346
	0.681052	0.118359		0.515913	0.0999956		0.650648	0.0967542
	0.685321	0.11884		0.518821	0.100447		0.655897	0.0974058
	0.689593	0.11925		0.521833	0.100834		0.661104	0.0979842
	0.693963	0.119564		0.524983	0.101156		0.666269	0.0984896
	0.698296	0.1198		0.528114	0.1014		0.671371	0.0989189
	0.70261	0.119953		0.531261	0.101569		0.67641	0.0992725
	0.706904	0.120012		0.534427	0.101667		0.681391	0.0995444
	0.711167	0.119973		0.537609	0.101693		0.68632	0.0997347
	0.715357	0.119843		0.54079	0.101647		0.691175	0.0998528
	0.719425	0.119632		0.543929	0.101523		0.695948	0.0999011
	0.723443	0.119339		0.546991	0.101319		0.700638	0.0998817
	0.727397	0.11896		0.549976	0.101036		0.705224	0.0997972
	0.731347	0.118493		0.552884	0.100674		0.709716	0.0996507
	0.735339	0.117941		0.555724	0.100236		0.714113	0.0994455
	0.739391	0.117305		0.5585	0.0997265		0.71842	0.0991859
	0.743462	0.116581		0.561206	0.0991467		0.722695	0.0988709
	0.747489	0.11577		0.56387	0.098498		0.726949	0.0985024
	0.751466	0.114878		0.566506	0.0977812		0.731199	0.0980913
	0.755357	0.113906		0.569114	0.0969983		0.735438	0.0976438
	0.75915	0.112868		0.571687	0.096155		0.739658	0.097168
	0.762854	0.111766		0.574234	0.0952576		0.743863	0.0966652
	0.766452	0.110598		0.576761	0.0943112		0.748039	0.0961433
	0.769935	0.109374		0.579312	0.0933292		0.752161	0.0956096
	0.773313	0.1081		0.581839	0.0923074		0.756274	0.0950739
	0.776579	0.106784		0.584318	0.0912403		0.760379	0.0945424
	0.779782	0.105434		0.586718	0.0901489		0.764401	0.0940198
	0.782843	0.104051		0.589067	0.0890371		0.768328	0.0935064
	0.785803	0.10264		0.591325	0.0879007		0.772167	0.0930026
	0.788624	0.101205		0.59351	0.086745		0.775949	0.0925177
	0.791404	0.0997292		0.595641	0.0855748		0.779647	0.0920446
	0.794093	0.0982324		0.597725	0.0843898		0.783196	0.0915808
	0.796697	0.0967202		0.599757	0.0832063		0.786571	0.091116
	0.79921	0.0951974		0.601724	0.0820308		0.789797	0.0906519
	0.801634	0.0936678		0.603662	0.0808699		0.792878	0.0901855
	0.803977	0.0921359		0.605595	0.0797332		0.795815	0.089716
	0.806259	0.0906105		0.607538	0.0786264		0.798621	0.0892406
	0.808419	0.0891007		0.60949	0.0775551		0.80128	0.0887603
	0.810477	0.087614		0.611456	0.0765235		0.803801	0.0882727
	0.812403	0.0861535		0.613403	0.0755369		0.806176	0.0877855
	0.814181	0.084724		0.615307	0.0745955		0.808451	0.0873077
	0.815802	0.0833342		0.617143	0.0736911		0.810817	0.0868744
	0.81726	0.0819902		0.618919	0.0728259		0.813282	0.0864874
	0.81856	0.0806949		0.620683	0.0719964		0.815882	0.0861537
	0.819701	0.0794514		0.622433	0.0712063		0.818617	0.0858791
	0.820713	0.0782515		0.624139	0.0704601		0.821492	0.0856648
	0.821653	0.0770881		0.625834	0.069777		0.824441	0.0854978
	0.822554	0.0759671		0.627514	0.0691604		0.827378	0.0853687
	0.823418	0.0748884		0.62919	0.0686123		0.830266	0.0852714
	0.82432	0.0738444		0.630956	0.0681358		0.833056	0.0851873
	0.825277	0.0728408		0.632779	0.0677116		0.83577	0.0851153
	0.826224	0.0718947		0.634594	0.067348		0.838392	0.0850544
	0.827116	0.0710185		0.636388	0.067028		0.840919	0.0849966
	0.827981	0.070209		0.638177	0.0667486		0.843342	0.0849415
	0.82892	0.06943		0.639975	0.0665116		0.845701	0.0848835
	0.829843	0.0686965		0.641793	0.0663126		0.848002	0.0848183
	0.83075	0.0679963		0.643642	0.0661475		0.850205	0.0847501
	0.831647	0.0673184		0.645544	0.0660145		0.852342	0.0846743
	0.832571	0.0666583		0.647474	0.0659069		0.854414	0.0845921
	0.833468	0.06602		0.649437	0.0658199		0.856404	0.0845119
	0.834295	0.0654218		0.651423	0.0657522		0.858312	0.0844376
	0.835085	0.0648568		0.653398	0.0657033		0.860144	0.0843679
	0.835827	0.0643328		0.655345	0.0656666		0.861918	0.0842902
	0.836581	0.0638468		0.657238	0.0656405		0.863624	0.0841989
	0.837358	0.0633924		0.65912	0.0656262		0.865258	0.084104
	0.838151	0.0629757		0.661019	0.065622		0.86681	0.0840012
	0.839002	0.0625825		0.662912	0.0656226		0.868339	0.083902
	0.839896	0.0622157		0.664831	0.065622		0.869868	0.0837938
	0.840862	0.061881		0.666808	0.0656178		0.871379	0.0836744
	0.841916	0.061578		0.668822	0.0656048		0.87285	0.0835537
	0.843029	0.0613186		0.670845	0.0655819		0.874285	0.083431
	0.84417	0.0610979		0.672924	0.0655337		0.875731	0.0833187
	0.845428	0.0608983		0.675084	0.0654431		0.877195	0.0832178
	0.84677	0.0607158		0.677277	0.0653249		0.878661	0.0831233
	0.848183	0.0605555		0.679439	0.0651923		0.880139	0.0830366
	0.84964	0.0604264		0.681548	0.0650633		0.881616	0.0829526
	0.851179	0.0603287		0.683604	0.0649357		0.883054	0.082866
	0.852711	0.060256		0.685644	0.0648188		0.88444	0.0827707
	0.854236	0.0602052		0.687678	0.0647112		0.885787	0.0826686
	0.855816	0.0601665		0.689634	0.0645853		0.887124	0.0825626
	0.857555	0.0601095		0.691565	0.064437		0.888465	0.0824586
	0.859348	0.0600567		0.693471	0.0642655		0.88977	0.0823397
	0.861211	0.0600142		0.695333	0.06407		0.890972	0.082192
	0.863078	0.0599777		0.697133	0.0638528		0.892118	0.0820406
	0.864957	0.0599394		0.698864	0.063615		0.893223	0.0818843
	0.866794	0.0598969		0.70053	0.0633549		0.894239	0.0817072
	0.868623	0.0598529		0.702183	0.063097		0.895155	0.0815013
	0.870452	0.0598038		0.703824	0.0628394		0.895957	0.0812689
	0.872307	0.0597405		0.705399	0.0625559		0.896617	0.0809955
	0.874182	0.0596626		0.706897	0.0622476		0.897095	0.0806921
	0.876119	0.0595691		0.708376	0.0618987		0.897494	0.0803669
	0.878248	0.0594389		0.709818	0.0615146		0.897987	0.080046
	0.880466	0.0592775		0.711174	0.0611136		0.898576	0.0797387
	0.882687	0.0591172		0.712458	0.0606947		0.899359	0.079436
	0.884824	0.0589429		0.713701	0.0602557		0.900373	0.0791349
	0.886924	0.0587406		0.714919	0.0597924		0.901657	0.0788414
	0.88902	0.0585244		0.716087	0.0593101		0.903169	0.0785543
	0.891093	0.0583115		0.717235	0.0588005		0.904813	0.0782667
	0.893164	0.0580931		0.718393	0.0582587		0.906507	0.0779736
	0.895334	0.0578508		0.719698	0.0576549		0.908205	0.0776581
	0.897612	0.0575855		0.7211	0.057005		0.909973	0.0773009
	0.899894	0.0573186		0.722617	0.0563383		0.911771	0.0769207
	0.90212	0.0570393		0.724259	0.0556828		0.913594	0.0765229
	0.904316	0.0567507		0.726013	0.0550523		0.915404	0.0761029
	0.906468	0.0564422		0.727873	0.0544523		0.917252	0.0756607
	0.908594	0.0561046		0.729707	0.0538597		0.919138	0.0751924
	0.910701	0.0557376		0.731564	0.0533004		0.921087	0.0746748
	0.912755	0.0553483		0.733481	0.0527806		0.923067	0.0741341
	0.914716	0.0549388		0.735475	0.0523024		0.925061	0.0735726
	0.91655	0.0545115		0.73755	0.0518535		0.927048	0.0729925
	0.918311	0.0540572		0.739659	0.0514167		0.929008	0.0723952
	0.920072	0.053577		0.741864	0.0509853		0.930974	0.0717882
	0.921752	0.0530859		0.744208	0.0505683		0.932956	0.0711709
	0.92336	0.0525844		0.746673	0.0501782		0.934936	0.070536
	0.925043	0.0520552		0.749234	0.0498125		0.93689	0.0699008
	0.926689	0.0515115		0.751923	0.0494657		0.938805	0.0692651
	0.928278	0.0509432		0.75481	0.049122		0.940678	0.0686427
	0.929797	0.0503539		0.757781	0.0487924		0.94258	0.0680198
	0.931149	0.0497588		0.760855	0.0484801		0.944516	0.0673977
	0.932342	0.0491579		0.76397	0.0481915		0.946467	0.066782
	0.933391	0.0485512		0.767105	0.0479312		0.948444	0.0661758
	0.934324	0.0479377		0.770286	0.0476866		0.950484	0.0655803
	0.935225	0.047313		0.773528	0.0474515		0.952564	0.0649944
	0.936133	0.0466861		0.776862	0.0472268		0.954751	0.0644092
	0.93706	0.0460588		0.78021	0.0470277		0.957063	0.0638156
	0.937932	0.0454385		0.783511	0.0468568		0.959406	0.0632296
	0.938908	0.0448014		0.786802	0.0467127		0.961789	0.0626652
	0.939955	0.0441423		0.790122	0.0466049		0.96414	0.0621417
	0.941181	0.0434475		0.793458	0.0465099		0.966462	0.0616651
	0.942539	0.0427228		0.796785	0.0464119		0.968769	0.0612293
	0.943976	0.0419702		0.800125	0.046309		0.971051	0.0608473
	0.945521	0.0411924		0.803479	0.0461914		0.973347	0.0605108
	0.947172	0.0403999		0.80679	0.0460752		0.975612	0.0602112
	0.948863	0.0396028		0.810052	0.0459663		0.977859	0.0599673
	0.950603	0.0387988		0.813384	0.0458494		0.980133	0.0597741
	0.952426	0.0379905		0.816759	0.0457492		0.982407	0.0596208
	0.954262	0.0372003		0.820187	0.0456624		0.984669	0.0594973
	0.956102	0.0364266		0.823693	0.0455958		0.986966	0.0593921
	0.957927	0.0356728		0.82725	0.0455721		0.989272	0.0593045
	0.959841	0.034924		0.830738	0.0455905		0.991413	0.0592432
	0.961875	0.0341881		0.8342	0.0456405		0.99343	0.0592054
	0.964171	0.0334423		0.837618	0.0457134		0.99532	0.0591915
	0.966652	0.0327013		0.840946	0.0458208		0.997115	0.0591968
	0.969254	0.0319795		0.844234	0.0459772		0.99886	0.0592299
	0.972055	0.0312677		0.847496	0.0461881		1.00059	0.0592974
	0.975081	0.0305744		0.850748	0.0464317		1.00233	0.0594014
	0.978195	0.0299286		0.853995	0.0467104		1.00415	0.0595318
	0.981426	0.0293179		0.857208	0.0470126		1.00598	0.0597
	0.98475	0.0287588		0.860363	0.0473271		1.0078	0.0599104
	0.988187	0.0282396		0.863529	0.0476366		1.0096	0.0601582
	0.991843	0.0277356		0.866712	0.0479473		1.01147	0.0604259
	0.995771	0.0272289		0.869967	0.0482551		1.0134	0.0607176
	0.999778	0.0267527		0.873291	0.0485709		1.01539	0.0610353
	1.00384	0.0263131		0.87661	0.0488921		1.01745	0.0613712
	1.00795	0.0259197		0.879846	0.0492296		1.01954	0.061734
	1.01203	0.0255861		0.882948	0.0495782		1.02169	0.0621184
	1.0161	0.0253212		0.885974	0.0499314		1.02398	0.0625046
	1.02027	0.0251032		0.888962	0.0502971		1.02631	0.0629012
	1.02436	0.0249499		0.891786	0.0506952		1.02873	0.0633034
	1.02835	0.0248523		0.894483	0.0511227		1.03118	0.0637157
	1.03225	0.0248092		0.897107	0.0515744		1.03365	0.0641326
	1.03614	0.0248069		0.899701	0.0520534		1.03626	0.0645402
	1.04004	0.0248523		0.90227	0.0525546		1.03896	0.0649491
	1.04394	0.0249527		0.904767	0.0530847		1.04175	0.0653523
	1.04797	0.0250814		0.907205	0.0536266		1.04465	0.0657415
	1.05196	0.0252476		0.909649	0.054173		1.04754	0.0661407
	1.0559	0.0254439		0.912118	0.0546945		1.05039	0.066553
	1.05975	0.025669		0.914561	0.0552046		1.0533	0.066954
	1.06341	0.0259182		0.916939	0.0557113		1.05627	0.0673353
	1.06694	0.0261793		0.919272	0.0562137		1.0593	0.0677043
	1.07027	0.0264467		0.921469	0.0567184		1.06235	0.0680627
	1.07346	0.0267181		0.923566	0.0572072		1.06542	0.0684098
	1.0765	0.0269878		0.925577	0.0576768		1.06851	0.0687471
	1.07958	0.0272564		0.927566	0.0581175		1.07162	0.0690762
	1.08256	0.0275292		0.929472	0.0585243		1.07489	0.0693866
	1.08549	0.0278006		0.931172	0.0588879		1.07824	0.0696909
	1.08851	0.0280782		0.93275	0.0591958		1.08172	0.0699813
	1.09152	0.0283772		0.934232	0.0594477		1.08523	0.0702664
	1.09456	0.0286922		0.935645	0.0596351		1.08876	0.0705403
	1.09748	0.029021		0.936936	0.0597721		1.09236	0.0708069
	1.10033	0.0293544		0.938102	0.059863		1.09597	0.0710746
	1.10305	0.0296942		0.939207	0.0598853		1.09962	0.0713431
	1.10559	0.030043		0.94032	0.0598494		1.10326	0.0716184
	1.10796	0.0303868		0.941436	0.059762		1.10685	0.0719198
	1.11019	0.0307345		0.942567	0.059622		1.11043	0.0722512
	1.11234	0.031093		0.943608	0.05946		1.11402	0.0726094
	1.11431	0.0314548		0.944636	0.0592868		1.11759	0.0729933
	1.1161	0.0318186		0.945695	0.0591032		1.12121	0.0733878
	1.11776	0.0321843		0.94679	0.0589017		1.12487	0.0737927
	1.11934	0.0325598		0.94778	0.0586828		1.12839	0.0742213
	1.12078	0.0329446		0.94865	0.0584452		1.13176	0.0746761
	1.1221	0.0333377		0.949436	0.058197		1.13502	0.0751503
	1.12324	0.0337237		0.950097	0.0579505		1.13821	0.0756349
	1.1243	0.0341207		0.950622	0.0577088		1.14128	0.0761429
	1.12538	0.0345314		0.951052	0.0574778		1.14424	0.0766755
	1.12648	0.0349491		0.951406	0.0572644		1.14706	0.0772308
	1.12752	0.0353773		0.951785	0.0570732		1.14982	0.0777866
	1.12859	0.0358212		0.95216	0.056919		1.15249	0.0783463
	1.12958	0.0362583		0.952544	0.0567909		1.15505	0.0789096
	1.13051	0.0366844		0.952916	0.0566902		1.15748	0.0794794
	1.1314	0.0371101		0.953211	0.0566324		1.1598	0.0800499
	1.13234	0.0375342		0.953449	0.0566033		1.16202	0.0806123
	1.13317	0.0379368		0.953616	0.0566006		1.16415	0.0811594
	1.13401	0.0383308		0.953813	0.056612		1.1663	0.081672
	1.13487	0.0387177		0.95411	0.0566346		1.16839	0.0821596
	1.13555	0.0390639		0.954405	0.0566741		1.17052	0.0826017
	1.13607	0.0393685		0.954741	0.0567344		1.17263	0.0830058
	1.13648	0.0396558		0.955131	0.0568063		1.17469	0.083375
	1.13666	0.0399189		0.955528	0.0568935		1.17665	0.0837128
	1.13662	0.0401618		0.955916	0.0569926		1.17852	0.0840353
	1.13639	0.0403964		0.956254	0.0571016		1.18028	0.0843398
	1.13597	0.0406214		0.956522	0.0572179		1.18204	0.0846111
	1.13541	0.0408354		0.956759	0.0573393		1.1838	0.0848544
	1.1348	0.0410406		0.956968	0.0574612		1.18558	0.0850642
	1.13416	0.0412326		0.957123	0.0575847		1.18741	0.0852316
	1.13351	0.0414187		0.957251	0.0577126		1.18919	0.0853737
	1.13278	0.0415985		0.95736	0.0578301		1.1909	0.0854943
	1.13186	0.041772		0.957491	0.0579394		1.19256	0.0855956
	1.13079	0.041943		0.957602	0.0580519		1.19419	0.085665
	1.12971	0.0421105		0.957678	0.0581822		1.19581	0.0857088
	1.1285	0.0422791		0.957661	0.0583317		1.19737	0.0857319
	1.12716	0.0424412		0.957573	0.0584986		1.19885	0.0857348
	1.12571	0.0426024		0.957446	0.0586854		1.2003	0.0857083
	1.12425	0.0427535		0.957331	0.0588841		1.20174	0.0856429
	1.12284	0.0428862		0.95723	0.0590894		1.20318	0.0855589
	1.12155	0.0429962		0.957128	0.0592948		1.20458	0.0854635
	1.12038	0.0430929		0.957093	0.0594947		1.20609	0.0853496
	1.11924	0.0431716		0.957184	0.0596897		1.20764	0.0852274
	1.11817	0.0432551		0.957311	0.0598773		1.20925	0.0850897
	1.1171	0.0433391		0.957317	0.0600568		1.21097	0.0849276
	1.11621	0.0434142		0.957212	0.0602283		1.21273	0.0847424
	1.11539	0.0434835		0.957123	0.0603691		1.21452	0.084532
	1.11466	0.0435269		0.957029	0.0604825		1.2163	0.0842989
	1.11403	0.043546		0.956867	0.0605777		1.21812	0.0840527
	1.11351	0.0435537		0.956566	0.0606726		1.21998	0.083794
	1.1131	0.04356		0.95612	0.0607754		1.22187	0.0835254
	1.11282	0.0435559		0.955566	0.060893		1.22373	0.0832607
	1.11268	0.0435452		0.954984	0.0610197		1.22553	0.0829958
	1.11259	0.0435365		0.95445	0.0611396		1.22728	0.0827344
	1.1125	0.0435245		0.953885	0.0612596		1.2289	0.0824865
	1.11245	0.043508		0.953301	0.0613782		1.23047	0.0822423
	1.11245	0.0434898		0.952716	0.0614892		1.232	0.0820011
	1.11241	0.0434711		0.952163	0.061582		1.2335	0.0817578
	1.11239	0.0434405		0.951611	0.0616467		1.23492	0.0815156
[truncated: 482 more rows]
