# Supplementary material for: Sensory input-dependent gain modulation of the optokinetic nystagmus by mid-infrared stimulation in pigeons
Source: eLife. 2023 Feb 28;12:e78729. doi: 10.7554/eLife.78729 (PMC9977280; doi:10.7554/eLife.78729)
Supplement: Figure 4—figure supplement 1—source data 1. [file elife-78729-fig4-figsupp1-data1.xlsx]

## Sheet: Fig4-S1AB
y x	0	5.4	5.40947	5.41893	5.4284	5.43787	5.44734	5.4568	5.46627	5.47574	5.48521	5.49467	5.50414	5.51361	5.52308	5.53254	5.54201	5.55148	5.56095	5.57041	5.57988	5.58935	5.59882	5.60828	5.61775	5.62722	5.63669	5.64615	5.65562	5.66509	5.67456	5.68402	5.69349	5.70296	5.71243	5.72189	5.73136	5.74083	5.7503	5.75976	5.76923	5.7787	5.78817	5.79763	5.8071	5.81657	5.82604	5.8355	5.84497
	9.3	0.000494641	0.000494641	0.000494641	0.000494641	0.000494641	0.000494641	0.000494641	0.000494641	0.000494641	0.000494641	0.000494641	0.000494641	0.000494641	0.000494641	0.000494641	0.000494641	0.000494641	0.000494641	0.000494641	0.000494641	0.000494641	0.000494641	0.000494641	0.000494641	0.000494641	0.000494641	0.000494641	0.000494641	0.000494641	0.000494641	0.000494641	0.000494641	0.000494641	0.000494641	0.000494641	0.000494641	0.000494641	0.000494641	0.000494641	0.000494641	0.000494641	0.000494641	0.000494641	0.000494641	0.000494641	0.000494641	0.000494641	0.000494641
	9.30947	0.000494641	0.000494641	0.000494641	0.000494641	0.000494641	0.000494641	0.000494641	0.000494641	0.000494641	0.000494641	0.000494641	0.000494641	0.000494641	0.000494641	0.000494641	0.000494641	0.000494641	0.000494641	0.000494641	0.000494641	0.000494641	0.000494641	0.000494641	0.000494641	0.000494641	0.000494641	0.000494641	0.000494641	0.000494641	0.000494641	0.000494641	0.000494641	0.000494646	0.000494715	0.000494846	0.000495009	0.000495179	0.000495327	0.000495425	0.000495445	0.000495361	0.000495143	0.000494764	0.000494365	0.000494265	0.000494333	0.00049442	0.000494374
	9.31893	0.000494641	0.000494641	0.000494641	0.000494641	0.000494641	0.000494641	0.000494641	0.000494641	0.000494641	0.000494641	0.000494641	0.000494641	0.000494641	0.000494641	0.000494641	0.000494641	0.000494641	0.000494641	0.000494641	0.000494641	0.000494641	0.000494641	0.000494641	0.000494641	0.000494641	0.000494641	0.000494641	0.000494641	0.000494641	0.000494641	0.000494641	0.000494641	0.00049465	0.000494773	0.000495007	0.0004953	0.000495604	0.000495869	0.000496044	0.000496081	0.000495929	0.000495539	0.000494862	0.000494147	0.000493967	0.000494089	0.000494244	0.000494162
	9.3284	0.000494641	0.000494641	0.000494641	0.000494641	0.000494641	0.000494641	0.000494641	0.000494641	0.000494641	0.000494641	0.000494641	0.000494641	0.000494641	0.000494641	0.000494641	0.000494641	0.000494641	0.000494641	0.000494641	0.000494641	0.000494641	0.000494641	0.000494641	0.000494641	0.000494641	0.000494641	0.000494641	0.000494641	0.000494641	0.000494641	0.000494641	0.000494641	0.000494652	0.000494816	0.000495126	0.000495515	0.000495917	0.000496268	0.0004965	0.000496549	0.000496348	0.000495831	0.000494933	0.000493986	0.000493748	0.00049391	0.000494115	0.000494006
	9.33787	0.000494641	0.000494641	0.000494641	0.000494641	0.000494641	0.000494641	0.000494641	0.000494641	0.000494641	0.000494641	0.000494641	0.000494641	0.000494641	0.000494641	0.000494641	0.000494641	0.000494641	0.000494641	0.000494641	0.000494641	0.000494641	0.000494641	0.000494641	0.000494641	0.000494641	0.000494641	0.000494641	0.000494641	0.000494641	0.000494641	0.000494641	0.000494641	0.000494654	0.000494844	0.000495202	0.000495652	0.000496117	0.000496523	0.000496792	0.000496848	0.000496616	0.000496018	0.000494979	0.000493883	0.000493608	0.000493795	0.000494032	0.000493906
	9.34734	0.000494641	0.000494641	0.000494641	0.000494641	0.000494641	0.000494641	0.000494641	0.000494641	0.000494641	0.000494641	0.000494641	0.000494641	0.000494641	0.000494641	0.000494641	0.000494641	0.000494641	0.000494641	0.000494641	0.000494641	0.000494641	0.000494641	0.000494641	0.000494641	0.000494641	0.000494641	0.000494641	0.000494641	0.000494641	0.000494641	0.000494641	0.000494641	0.000494655	0.000494856	0.000495235	0.000495712	0.000496205	0.000496635	0.00049692	0.00049698	0.000496733	0.0004961	0.000494999	0.000493838	0.000493546	0.000493745	0.000493996	0.000493863
	9.3568	0.000494641	0.000494641	0.000494641	0.000494641	0.000494641	0.000494641	0.000494641	0.000494641	0.000494641	0.000494641	0.000494641	0.000494641	0.000494641	0.000494641	0.000494641	0.000494641	0.000494641	0.000494641	0.000494641	0.000494641	0.000494641	0.000494641	0.000494641	0.000494641	0.000494641	0.000494641	0.000494641	0.000494641	0.000494641	0.000494641	0.000494641	0.000494641	0.000494655	0.000494852	0.000495226	0.000495695	0.000496181	0.000496604	0.000496884	0.000496943	0.0004967	0.000496077	0.000494994	0.000493851	0.000493564	0.000493759	0.000494006	0.000493875
	9.36627	0.000494641	0.000494641	0.000494641	0.000494641	0.000494641	0.000494641	0.000494641	0.000494641	0.000494641	0.000494641	0.000494641	0.000494641	0.000494641	0.000494641	0.000494641	0.000494641	0.000494641	0.000494641	0.000494641	0.000494641	0.000494641	0.000494641	0.000494641	0.000494641	0.000494641	0.000494641	0.000494641	0.000494641	0.000494641	0.000494641	0.000494641	0.000494641	0.000494654	0.000494834	0.000495174	0.000495601	0.000496044	0.000496429	0.000496684	0.000496738	0.000496517	0.000495949	0.000494962	0.000493921	0.00049366	0.000493837	0.000494063	0.000493943
	9.37574	0.000494641	0.000494641	0.000494641	0.000494641	0.000494641	0.000494641	0.000494641	0.000494641	0.000494641	0.000494641	0.000494641	0.000494641	0.000494641	0.000494641	0.000494641	0.000494641	0.000494641	0.000494641	0.000494641	0.000494641	0.000494641	0.000494641	0.000494641	0.000494641	0.000494641	0.000494641	0.000494641	0.000494641	0.000494641	0.000494641	0.000494641	0.000494641	0.000494651	0.000494799	0.000495079	0.00049543	0.000495794	0.000496111	0.000496321	0.000496365	0.000496183	0.000495716	0.000494905	0.000494049	0.000493834	0.00049398	0.000494166	0.000494067
	9.38521	0.000494641	0.000494641	0.000494641	0.000494641	0.000494641	0.000494641	0.000494641	0.000494641	0.000494641	0.000494641	0.000494641	0.000494641	0.000494641	0.000494641	0.000494641	0.000494641	0.000494641	0.000494641	0.000494641	0.000494641	0.000494641	0.000494641	0.000494641	0.000494641	0.000494641	0.000494641	0.000494641	0.000494641	0.000494641	0.000494641	0.000494641	0.000494641	0.000494648	0.00049475	0.000494942	0.000495183	0.000495432	0.000495649	0.000495793	0.000495824	0.000495699	0.000495379	0.000494822	0.000494235	0.000494088	0.000494188	0.000494315	0.000494248
	9.39467	0.000494641	0.000494641	0.000494641	0.000494641	0.000494641	0.000494641	0.000494641	0.000494641	0.000494641	0.000494641	0.000494641	0.000494641	0.000494641	0.000494641	0.000494641	0.000494641	0.000494641	0.000494641	0.000494641	0.000494641	0.000494641	0.000494641	0.000494641	0.000494641	0.000494641	0.000494641	0.000494641	0.000494641	0.000494641	0.000494641	0.000494641	0.000494641	0.000494644	0.000494685	0.000494762	0.000494858	0.000494958	0.000495045	0.000495102	0.000495114	0.000495065	0.000494936	0.000494714	0.000494479	0.00049442	0.00049446	0.000494511	0.000494484
	9.40414	0.000494641	0.000494641	0.000494641	0.000494641	0.000494641	0.000494641	0.000494641	0.000494641	0.000494641	0.000494641	0.000494641	0.000494642	0.000494644	0.000494647	0.000494651	0.000494655	0.000494659	0.000494661	0.000494661	0.000494659	0.000494653	0.000494643	0.000494648	0.00049469	0.000494754	0.000494825	0.000494888	0.000494929	0.000494932	0.000494883	0.000494766	0.000494567	0.000494276	0.000493966	0.000493645	0.000493294	0.000492892	0.000492418	0.000491854	0.000491178	0.00049037	0.00048941	0.000488278	0.000486857	0.00048497	0.00048273	0.000480266	0.000477705
	9.41361	0.000494641	0.000494641	0.000494641	0.000494641	0.000494641	0.000494641	0.000494641	0.000494641	0.000494641	0.000494641	0.000494641	0.000494644	0.000494662	0.000494695	0.000494734	0.000494775	0.000494809	0.00049483	0.000494832	0.000494808	0.000494752	0.000494657	0.000494705	0.00049511	0.000495732	0.000496425	0.000497042	0.00049744	0.000497471	0.000496991	0.000495854	0.000493915	0.000491101	0.000488295	0.000485578	0.000482667	0.000479279	0.000475132	0.000469942	0.000463427	0.000455304	0.000445291	0.000433103	0.000418047	0.000399372	0.000377795	0.000354089	0.000329029
	9.42308	0.000494641	0.000494641	0.000494641	0.000494641	0.000494641	0.000494641	0.000494641	0.000494641	0.000494641	0.000494641	0.000494641	0.000494647	0.000494695	0.000494778	0.000494879	0.000494982	0.00049507	0.000495124	0.00049513	0.000495069	0.000494925	0.00049468	0.000494803	0.000495842	0.000497434	0.000499207	0.000500788	0.000501805	0.000501886	0.000500657	0.000497747	0.000492782	0.000485583	0.000478489	0.000471703	0.000464464	0.000456012	0.000445587	0.000432429	0.000415777	0.000394871	0.000368951	0.000337256	0.000298189	0.000250247	0.000195095	0.000134518	7.03018e-05
	9.43254	0.000494641	0.000494641	0.000494641	0.000494641	0.000494641	0.000494641	0.000494641	0.000494641	0.000494641	0.000494641	0.000494641	0.000494651	0.000494734	0.000494879	0.000495056	0.000495236	0.000495388	0.000495484	0.000495493	0.000495387	0.000495135	0.000494709	0.000494924	0.000496735	0.000499511	0.000502603	0.000505361	0.000507135	0.000507276	0.000505133	0.000500057	0.000491398	0.000478847	0.000466527	0.000454788	0.000442286	0.000427672	0.000409601	0.000386725	0.000357699	0.000321174	0.000275805	0.000220245	0.000151814	6.81255e-05	-2.80119e-05	-0.000133596	-0.000245626
	9.44201	0.000494641	0.000494641	0.000494641	0.000494641	0.000494641	0.000494641	0.000494641	0.000494641	0.000494641	0.000494641	0.000494641	0.000494655	0.000494775	0.000494982	0.000495236	0.000495493	0.000495711	0.000495848	0.000495862	0.000495709	0.000495349	0.000494738	0.000495046	0.000497641	0.000501618	0.000506047	0.000509998	0.000512539	0.00051274	0.000509671	0.000502399	0.000489996	0.000472017	0.000454384	0.0004376	0.00041973	0.000398838	0.000372986	0.00034024	0.000298663	0.000246318	0.00018127	0.000101583	3.45212e-06	-0.000116462	-0.000254167	-0.000405402	-0.000565902
	9.45148	0.000494641	0.000494641	0.000494641	0.000494641	0.000494641	0.000494641	0.000494641	0.000494641	0.000494641	0.000494641	0.000494641	0.000494659	0.000494809	0.00049507	0.000495388	0.000495711	0.000495985	0.000496157	0.000496174	0.000495983	0.00049553	0.000494762	0.00049515	0.000498409	0.000503406	0.000508971	0.000513935	0.000517127	0.00051738	0.000513523	0.000504388	0.000488805	0.000466215	0.000444037	0.000422906	0.000400397	0.000374089	0.000341558	0.000300383	0.00024814	0.000182407	0.000100762	7.80493e-07	-0.000122365	-0.000272983	-0.000446013	-0.000636046	-0.000837674
	9.46095	0.000494641	0.000494641	0.000494641	0.000494641	0.000494641	0.000494641	0.000494641	0.000494641	0.000494641	0.000494641	0.000494641	0.000494661	0.00049483	0.000495124	0.000495484	0.000495848	0.000496157	0.000496352	0.000496371	0.000496155	0.000495644	0.000494778	0.000495215	0.000498892	0.00050453	0.000510808	0.000516407	0.000520009	0.000520294	0.000515943	0.000505637	0.000488057	0.000462567	0.000437466	0.000413472	0.000387885	0.000358005	0.000321132	0.000274565	0.000215603	0.000141546	4.96949e-05	-6.26519e-05	-0.000201107	-0.000370908	-0.000566192	-0.00078068	-0.00100809
	9.47041	0.000494641	0.000494641	0.000494641	0.000494641	0.000494641	0.000494641	0.000494641	0.000494641	0.000494641	0.000494641	0.000494641	0.000494661	0.000494832	0.00049513	0.000495493	0.000495862	0.000496174	0.000496371	0.00049639	0.000496172	0.000495655	0.000494779	0.000495221	0.00049894	0.000504641	0.000510989	0.000516651	0.000520294	0.000520582	0.000516182	0.00050576	0.000487983	0.000462196	0.000436645	0.000412066	0.000385794	0.000355167	0.000317522	0.000270194	0.000210521	0.000135839	4.34857e-05	-6.92031e-05	-0.000208243	-0.000379705	-0.000577346	-0.00079445	-0.0010243
	9.47988	0.000494641	0.000494641	0.000494641	0.000494641	0.000494641	0.000494641	0.000494641	0.000494641	0.000494641	0.000494641	0.000494641	0.000494659	0.000494808	0.000495069	0.000495387	0.000495709	0.000495983	0.000496155	0.000496172	0.000495981	0.000495529	0.000494762	0.000495149	0.000498403	0.000503392	0.000508948	0.000513903	0.000517091	0.000517343	0.000513493	0.000504372	0.000488814	0.000466226	0.000443553	0.000421455	0.000397723	0.000370155	0.000336542	0.000294681	0.000242366	0.00017739	9.75497e-05	6.37887e-07	-0.000119241	-0.000268844	-0.000442117	-0.000632505	-0.000833454
	9.48935	0.000494641	0.000494641	0.000494641	0.000494641	0.000494641	0.000494641	0.000494641	0.000494641	0.000494641	0.000494641	0.000494641	0.000494653	0.000494752	0.000494925	0.000495135	0.000495349	0.00049553	0.000495644	0.000495655	0.000495529	0.000495229	0.000494721	0.000494977	0.000497133	0.000500437	0.000504117	0.000507399	0.000509511	0.000509678	0.000507127	0.000501086	0.000490782	0.000475781	0.000460168	0.000444405	0.000427272	0.000407546	0.000384008	0.000355436	0.000320608	0.000278304	0.000227303	0.000166382	9.04285e-05	-7.79305e-06	-0.000123147	-0.000249994	-0.000382695
	9.49882	0.000494641	0.000494641	0.000494641	0.000494641	0.000494641	0.000494641	0.000494641	0.000494641	0.000494641	0.000494641	0.000494641	0.000494643	0.000494657	0.00049468	0.000494709	0.000494738	0.000494762	0.000494778	0.000494779	0.000494762	0.000494721	0.000494652	0.000494687	0.00049498	0.000495429	0.000495929	0.000496375	0.000496662	0.000496685	0.000496338	0.000495517	0.000494117	0.000491984	0.000488465	0.000483684	0.000478038	0.000471923	0.000465734	0.000459868	0.00045472	0.000450685	0.00044816	0.00044754	0.000445298	0.000433979	0.000416921	0.000397934	0.000380826
	9.50828	0.000494641	0.000494641	0.000494641	0.000494641	0.000494641	0.000494641	0.000494641	0.000494641	0.000494641	0.000494641	0.000494641	0.000494669	0.000494911	0.000495333	0.000495847	0.000496368	0.000496811	0.000497089	0.000497116	0.000496807	0.000496076	0.000494836	0.000491855	0.000485874	0.000477897	0.000468951	0.000460068	0.000452277	0.000446607	0.000444087	0.000445748	0.000452618	0.00046509	0.00047536	0.000482937	0.000490544	0.000500906	0.000516747	0.000540791	0.000575761	0.000624382	0.000689378	0.000773473	0.000875611	0.000988382	0.00111235	0.00124849	0.00139776
	9.51775	0.000494641	0.000494641	0.000494641	0.000494641	0.000494641	0.000494641	0.000494641	0.000494641	0.000494641	0.000494641	0.000494641	0.000494777	0.000495962	0.000498021	0.000500536	0.000503086	0.000505251	0.00050661	0.000506744	0.000505233	0.000501657	0.000495595	0.000483803	0.000463239	0.000436619	0.000406724	0.000376335	0.000348233	0.000325199	0.000310014	0.000305459	0.000314315	0.00033792	0.000358756	0.000375308	0.00039328	0.000418377	0.000456302	0.000512759	0.000593452	0.000704085	0.000850362	0.00103799	0.00126916	0.0015367	0.00183753	0.00216889	0.00252801
	9.52722	0.000494641	0.000494641	0.000494641	0.000494641	0.000494641	0.000494641	0.000494641	0.000494641	0.000494641	0.000494641	0.000494641	0.000494936	0.000497503	0.000501968	0.00050742	0.000512947	0.000517639	0.000520586	0.000520878	0.000517602	0.000509849	0.000496708	0.000472442	0.000431905	0.000379967	0.000321605	0.000261801	0.000205535	0.000157787	0.000123538	0.000107767	0.000115455	0.000149161	0.00017963	0.000204041	0.000231623	0.000271611	0.000333236	0.000425731	0.000558329	0.00074026	0.000980759	0.00128906	0.00167127	0.00212061	0.00262963	0.00319108	0.0037977
	9.53669	0.000494641	0.000494641	0.000494641	0.000494641	0.000494641	0.000494641	0.000494641	0.000494641	0.000494641	0.000494641	0.000494641	0.000495112	0.000499224	0.000506372	0.000515101	0.000523951	0.000531464	0.000536183	0.000536649	0.000531404	0.000518991	0.000497951	0.000459739	0.00039684	0.000316538	0.000226289	0.000133546	4.57642e-05	-2.9603e-05	-8.51013e-05	-0.000113276	-0.000106674	-6.13631e-05	-1.98081e-05	1.36946e-05	5.23512e-05	0.000109368	0.000197951	0.000331306	0.00052264	0.000785158	0.00113207	0.00157657	0.00212926	0.00278385	0.00352795	0.0043492	0.00523522
	9.54615	0.000494641	0.000494641	0.000494641	0.000494641	0.000494641	0.000494641	0.000494641	0.000494641	0.000494641	0.000494641	0.000494641	0.000495275	0.00050081	0.000510433	0.000522183	0.000534097	0.000544211	0.000550563	0.000551191	0.00054413	0.00052742	0.000499096	0.000447663	0.000363007	0.000254933	0.000133471	8.65095e-06	-0.000109498	-0.000210946	-0.000285662	-0.000323618	-0.000314783	-0.000253826	-0.000197352	-0.00015117	-9.77587e-05	-1.95947e-05	0.000100844	0.000281079	0.000538633	0.000891028	0.00135579	0.00195043	0.00269042	0.00357015	0.00457179	0.00567736	0.00686892
	9.55562	0.000494641	0.000494641	0.000494641	0.000494641	0.000494641	0.000494641	0.000494641	0.000494641	0.000494641	0.000494641	0.000494641	0.000495393	0.000501949	0.00051335	0.000527271	0.000541385	0.000553367	0.000560893	0.000561636	0.000553272	0.000533475	0.000499919	0.000438179	0.000335374	0.000203752	5.58475e-05	-9.58047e-05	-0.000238671	-0.000360216	-0.000447905	-0.000489206	-0.000471582	-0.000388403	-0.000310794	-0.000245995	-0.000171929	-6.65178e-05	9.23153e-05	0.000326648	0.000658557	0.00111012	0.00170341	0.00246052	0.00340209	0.00452325	0.00580042	0.0072097	0.00872717
	9.56509	0.000494641	0.000494641	0.000494641	0.000494641	0.000494641	0.000494641	0.000494641	0.000494641	0.000494641	0.000494641	0.000494641	0.000495432	0.000502329	0.000514323	0.000528967	0.000543815	0.00055642	0.000564337	0.000565119	0.00055632	0.000535493	0.000500193	0.000433255	0.000318905	0.000171593	6.11251e-06	-0.000162741	-0.000320172	-0.000451387	-0.00054159	-0.000575987	-0.000539783	-0.000425268	-0.000317926	-0.00022622	-0.000123382	1.73569e-05	0.000222764	0.000519609	0.000934659	0.00149468	0.00222645	0.00315673	0.00431155	0.00568687	0.00725315	0.00898033	0.0108383
	9.57456	0.000494641	0.000494641	0.000494641	0.000494641	0.000494641	0.000494641	0.000494641	0.000494641	0.000494641	0.000494641	0.000494641	0.00049536	0.000501637	0.00051255	0.000525875	0.000539385	0.000550855	0.000558059	0.00055877	0.000550764	0.000531814	0.000499693	0.000434859	0.000318568	0.000167056	-3.0383e-06	-0.000175077	-0.000332421	-0.000458434	-0.000536476	-0.000549909	-0.000482096	-0.000324597	-0.00017654	-4.72847e-05	9.46604e-05	0.000280788	0.00054259	0.000911559	0.00141919	0.00209697	0.00297639	0.00408895	0.00546613	0.00710476	0.00896927	0.0110234	0.0132308
	9.58402	0.000494641	0.000494641	0.000494641	0.000494641	0.000494641	0.000494641	0.000494641	0.000494641	0.000494641	0.000494641	0.000494641	0.000495147	0.000499559	0.000507231	0.000516599	0.000526097	0.00053416	0.000539224	0.000539725	0.000534096	0.000520774	0.000498193	0.000444956	0.000339326	0.00019874	4.10903e-05	-0.000115733	-0.000253837	-0.00035533	-0.000402322	-0.00037692	-0.000261232	-4.65637e-05	0.000155572	0.000335369	0.000528975	0.000772534	0.00110219	0.0015541	0.00216439	0.00296923	0.00400474	0.00530709	0.00691313	0.00882064	0.0109881	0.013373	0.0159329
	9.59349	0.000494641	0.000494641	0.000494641	0.000494641	0.000494641	0.000494641	0.000494641	0.000494641	0.000494641	0.000494641	0.000494641	0.000494759	0.000495784	0.000497566	0.000499742	0.000501948	0.000503821	0.000504998	0.000505114	0.000503807	0.000500712	0.000495466	0.000465514	0.000386147	0.000275246	0.000151193	3.23714e-05	-6.28377e-05	-0.000116052	-0.000108889	-2.29657e-05	0.000160099	0.000448656	0.000720617	0.000966302	0.00122634	0.00154135	0.00195197	0.00249882	0.00322252	0.0041637	0.005363	0.00686102	0.00869986	0.0108782	0.0133488	0.0160632	0.018973
	9.60296	0.000494641	0.000494641	0.000494641	0.000494641	0.000494641	0.000494641	0.000494641	0.000494641	0.000494641	0.000494641	0.000494641	0.00049417	0.000490051	0.000482889	0.000474145	0.000465279	0.000457752	0.000453025	0.000452558	0.000457812	0.000470248	0.000491326	0.000498191	0.000463252	0.00040392	0.000338139	0.000283857	0.000259022	0.000281579	0.000369475	0.000540659	0.000813075	0.001194	0.00155294	0.00188103	0.00222319	0.00262432	0.00312933	0.00378314	0.00463066	0.00571678	0.00708642	0.0087845	0.0108581	0.0133068	0.0160778	0.0191169	0.0223702
	9.61243	0.000494641	0.000494641	0.000494641	0.000494641	0.000494641	0.000494641	0.000494641	0.000494641	0.000494641	0.000494641	0.000494641	0.000493437	0.000482919	0.00046463	0.000442299	0.000419658	0.000400437	0.000388365	0.000387172	0.00040059	0.000432347	0.000486175	0.000539788	0.000563067	0.000572091	0.0005835	0.000613936	0.000680042	0.000798458	0.000985826	0.00125879	0.00163399	0.00211678	0.00256817	0.00298092	0.003405	0.00389039	0.00448708	0.00524504	0.00621426	0.00744473	0.00898641	0.0108893	0.013206	0.0159365	0.0190218	0.0224015	0.0260149
	9.62189	0.000494641	0.000494641	0.000494641	0.000494641	0.000494641	0.000494641	0.000494641	0.000494641	0.000494641	0.000494641	0.000494641	0.000492585	0.000474632	0.000443414	0.000405298	0.000366652	0.000333843	0.000313237	0.000311201	0.000334104	0.000388311	0.000480191	0.00058875	0.000681636	0.000772886	0.000877114	0.00100894	0.00118297	0.00141382	0.00171612	0.00210447	0.00259349	0.00318588	0.00373376	0.0042321	0.0047368	0.00530372	0.00598876	0.00684781	0.00793673	0.00931142	0.0110278	0.0131416	0.0157118	0.0187381	0.0221546	0.0258938	0.0298882
	9.63136	0.000494641	0.000494641	0.000494641	0.000494641	0.000494641	0.000494641	0.000494641	0.000494641	0.000494641	0.000494641	0.000494641	0.000491616	0.000465204	0.000419277	0.000363203	0.000306348	0.00025808	0.000227765	0.000224771	0.000258464	0.000338212	0.000473382	0.000644845	0.000818146	0.00100469	0.00121647	0.00146547	0.0017637	0.00212313	0.00255578	0.00307362	0.00368864	0.00440035	0.00505205	0.0056415	0.00623094	0.00688262	0.00765877	0.00862165	0.0098335	0.0113566	0.0132531	0.0155853	0.0184184	0.0217521	0.0255129	0.0296259	0.0340161
	9.64083	0.000494641	0.000494641	0.000494641	0.000494641	0.000494641	0.000494641	0.000494641	0.000494641	0.000494641	0.000494641	0.000494641	0.000490531	0.000454649	0.000392255	0.000316074	0.000238833	0.000173258	0.000132073	0.000128005	0.00017378	0.000282122	0.000465759	0.000707843	0.000971784	0.00126588	0.00159904	0.00198016	0.00241813	0.00292185	0.00350023	0.00416215	0.00491652	0.00575919	0.0065254	0.00721604	0.0078998	0.00864538	0.00952148	0.0105968	0.01194	0.0136199	0.015705	0.0182641	0.0213691	0.0250191	0.0291334	0.0336294	0.0384245
	9.6503	0.000494641	0.000494641	0.000494641	0.000494641	0.000494641	0.000494641	0.000494641	0.000494641	0.000494641	0.000494641	0.000494641	0.000489332	0.00044298	0.000362381	0.000263973	0.000164196	7.94869e-05	2.62857e-05	2.10309e-05	8.01611e-05	0.000220115	0.000457332	0.000777513	0.00114174	0.00155486	0.00202233	0.00254962	0.00314217	0.00380544	0.0045449	0.00536598	0.00627416	0.00726143	0.00815617	0.00896264	0.00975574	0.0106103	0.0116013	0.0128034	0.0142917	0.016141	0.0184262	0.021222	0.0246069	0.0285799	0.033053	0.0379363	0.0431396
	9.65976	0.000494641	0.000494641	0.000494641	0.000494641	0.000494641	0.000494641	0.000494641	0.000494641	0.000494641	0.000494641	0.000494641	0.000488019	0.000430211	0.000329691	0.000206961	8.25222e-05	-2.31233e-05	-8.94737e-05	-9.60273e-05	-2.22824e-05	0.000152263	0.00044811	0.000853625	0.00132719	0.00186999	0.00248381	0.00317045	0.00393171	0.00476936	0.00568521	0.00668104	0.00775865	0.0089061	0.00994671	0.0108883	0.0118111	0.0127957	0.0139225	0.0152718	0.0169241	0.0189598	0.0214592	0.0245028	0.028175	0.0324751	0.0373085	0.0425782	0.0481873
	9.66923	0.000494641	0.000494641	0.000494641	0.000494641	0.000494641	0.000494641	0.000494641	0.000494641	0.000494641	0.000494641	0.000494641	0.000486595	0.000416356	0.000294221	0.000145099	-6.09934e-06	-0.000134463	-0.000215081	-0.000223044	-0.000133441	7.86383e-05	0.000438104	0.000935947	0.00152733	0.00220966	0.00298097	0.00383929	0.00478264	0.00580907	0.00691658	0.00810323	0.00936703	0.0106922	0.0118994	0.0129998	0.0140783	0.0152199	0.0165096	0.0180321	0.0198725	0.0221158	0.0248467	0.0281504	0.0321163	0.0367452	0.0419365	0.047587	0.0535937
	9.6787	0.000494641	0.000494641	0.000494641	0.000494641	0.000494641	0.000494641	0.000494641	0.000494641	0.000494641	0.000494641	0.000494641	0.000485061	0.000401429	0.000256004	7.8447e-05	-0.000101582	-0.000254422	-0.000350412	-0.000359894	-0.000253205	-6.86022e-07	0.000427324	0.00102425	0.00174135	0.00257226	0.0035113	0.00455274	0.00569088	0.00692002	0.00823446	0.00962848	0.0110964	0.0126188	0.0140165	0.0153042	0.0165697	0.0179012	0.0193868	0.0211146	0.0231725	0.0256488	0.0286314	0.0322085	0.0364741	0.041431	0.0469739	0.0529945	0.0593848
	9.68817	0.000494641	0.000494641	0.000494641	0.000494641	0.000494641	0.000494641	0.000494641	0.000494641	0.000494641	0.000494641	0.000494641	0.000483418	0.000385442	0.000215076	7.06739e-06	-0.000203837	-0.00038289	-0.000495344	-0.000506451	-0.000381465	-8.56374e-05	0.000415778	0.0011183	0.00196843	0.00295618	0.00407227	0.00530741	0.00665232	0.00809769	0.00963425	0.0112527	0.0129437	0.0146848	0.0163006	0.0178083	0.0192976	0.0208579	0.0225787	0.0245494	0.0268595	0.0295985	0.0328558	0.036721	0.0412914	0.0465731	0.0524574	0.0588325	0.0655866
	9.69763	0.000494641	0.000494641	0.000494641	0.000494641	0.000494641	0.000494641	0.000494641	0.000494641	0.000494641	0.000494641	0.000494641	0.000481668	0.000368411	0.000171473	-6.89793e-05	-0.000312779	-0.000519758	-0.000649751	-0.000662591	-0.000518111	-0.000176143	0.000403478	0.00121787	0.00220775	0.00335979	0.00466138	0.00609993	0.00766285	0.00933753	0.0111114	0.0129718	0.0149062	0.0168894	0.0187538	0.0205192	0.0222745	0.0241083	0.0261095	0.0283668	0.0309689	0.0340046	0.0375626	0.0417318	0.0466113	0.0522121	0.0584238	0.0651328	0.0722252
	9.7071	0.000494641	0.0004952	0.000495642	0.000495967	0.000496176	0.000496267	0.000496241	0.000496099	0.00049584	0.000495463	0.00049497	0.000479516	0.000349202	0.000123025	-0.000153057	-0.000433086	-0.000671103	-0.000821151	-0.00083727	-0.000673503	-0.000283891	0.000377524	0.0013086	0.00244281	0.00376398	0.00525675	0.00690579	0.00869573	0.0106112	0.0126369	0.0147575	0.0169576	0.0192103	0.0213609	0.0234309	0.0255057	0.0276703	0.0300101	0.0326102	0.0355557	0.038932	0.0428243	0.0473176	0.0525113	0.0584232	0.0649437	0.0719593	0.0793565
	9.71657	0.000494641	0.000497374	0.000499535	0.000501125	0.000502143	0.000502589	0.000502464	0.000501768	0.0005005	0.00049866	0.000496249	0.000476404	0.000325651	6.55662e-05	-0.000251645	-0.000573778	-0.000848628	-0.00102399	-0.00104766	-0.000867437	-0.00043111	0.000313522	0.00136383	0.002644	0.00413584	0.00582206	0.00768539	0.00970857	0.0118743	0.0141654	0.0165644	0.0190543	0.0216076	0.0240883	0.0265187	0.028977	0.0315415	0.0342903	0.0373017	0.0406537	0.0444247	0.0486928	0.0535363	0.0590521	0.0652679	0.0720773	0.0793696	0.0870344
	9.72604	0.000494641	0.000500624	0.000505354	0.000508834	0.000511063	0.00051204	0.000511767	0.000510242	0.000507466	0.000503439	0.00049816	0.000472616	0.000298846	1.1823e-06	-0.000361507	-0.000730354	-0.00104649	-0.00125104	-0.00128515	-0.00108994	-0.000606538	0.000223914	0.00139743	0.00282739	0.00449407	0.00637881	0.00846296	0.0107279	0.0131549	0.0157253	0.0184206	0.021222	0.0241028	0.0269503	0.029787	0.0326812	0.0357015	0.0389164	0.0423943	0.0462038	0.0504133	0.0550914	0.0603066	0.0661518	0.0726668	0.0797503	0.0872968	0.0952005
	9.7355	0.000494641	0.000504341	0.000512012	0.000517655	0.000521269	0.000522854	0.00052241	0.000519937	0.000515436	0.000508906	0.000500347	0.000468472	0.000270018	-6.77721e-05	-0.000478991	-0.000897731	-0.00125808	-0.00149414	-0.00154	-0.00132975	-0.000797476	0.00012272	0.00142503	0.003011	0.00485957	0.00695095	0.00926534	0.0117829	0.0144839	0.0173486	0.020357	0.0234894	0.0267201	0.0299636	0.0332417	0.0366114	0.0401296	0.0438531	0.0478388	0.0521437	0.0568246	0.0619385	0.0675421	0.0737234	0.0805354	0.0878837	0.0956692	0.103792
	9.74497	0.000494641	0.00050792	0.000518421	0.000526145	0.000531092	0.000533262	0.000532654	0.00052927	0.000523108	0.000514169	0.000502452	0.00046429	0.000240395	-0.000138942	-0.000600444	-0.00107083	-0.00147682	-0.00174513	-0.00180249	-0.00157561	-0.000991222	2.39626e-05	0.00146226	0.00321283	0.00525322	0.00756242	0.0101194	0.0129031	0.0158926	0.0190668	0.0224047	0.0258852	0.0294837	0.0331444	0.0368887	0.0407609	0.044805	0.0490653	0.0535861	0.0584113	0.0635854	0.0691524	0.0751565	0.0816798	0.0887892	0.0963984	0.104415	0.112748
	9.75444	0.000494641	0.000510752	0.000523493	0.000532864	0.000538866	0.000541498	0.000540761	0.000536655	0.000529179	0.000518333	0.000504118	0.00046039	0.000211207	-0.000209974	-0.000722211	-0.00124456	-0.00169609	-0.00199584	-0.00206289	-0.00181628	-0.00117508	-5.8338e-05	0.00152473	0.00345089	0.00569591	0.00823717	0.011052	0.0141178	0.017412	0.0209118	0.0245946	0.0284379	0.0324177	0.0365094	0.040734	0.0451229	0.0497072	0.054518	0.0595867	0.0649444	0.0706223	0.0766517	0.0830636	0.0899339	0.0973439	0.105215	0.113463	0.122004
	9.76391	0.000494641	0.000512229	0.000526139	0.00053637	0.000542922	0.000545796	0.000544991	0.000540508	0.000532346	0.000520506	0.000504987	0.000457091	0.000183683	-0.000278512	-0.000840642	-0.00141385	-0.0019093	-0.00223812	-0.00231147	-0.00204049	-0.00133634	-0.00011016	0.00162807	0.00374319	0.00620853	0.00899914	0.0120901	0.0154564	0.0190731	0.0229152	0.0269579	0.0311762	0.0355463	0.0400749	0.0447834	0.0496906	0.0548153	0.060176	0.0657916	0.0716808	0.0778622	0.0843547	0.0911769	0.0983987	0.106115	0.114255	0.122742	0.131499
	9.77337	0.000494641	0.000511745	0.000525272	0.000535221	0.000541593	0.000544388	0.000543605	0.000539245	0.000531308	0.000519794	0.000504703	0.000454713	0.000159052	-0.000342202	-0.000952081	-0.00157362	-0.00210985	-0.0024638	-0.0025385	-0.002237	-0.00146231	-0.000117483	0.00178789	0.00410775	0.00681196	0.00987227	0.0132604	0.016948	0.020907	0.0251089	0.0295256	0.0341287	0.0388937	0.0438575	0.0490429	0.0544574	0.0601087	0.0660042	0.0721515	0.0785582	0.0852319	0.09218	0.0994102	0.106987	0.115018	0.123439	0.13218	0.141169
	9.78284	0.000494641	0.000508692	0.000519804	0.000527977	0.000533211	0.000535507	0.000534864	0.000531283	0.000524763	0.000515304	0.000502906	0.000453576	0.000138544	-0.000398689	-0.00105288	-0.00171877	-0.00229113	-0.00266471	-0.00273426	-0.00239454	-0.00154029	-6.62843e-05	0.00201982	0.00456257	0.0075271	0.0108805	0.0145899	0.0186223	0.0229448	0.0275245	0.0323286	0.037324	0.042484	0.0478736	0.0535182	0.0594164	0.0655666	0.0719673	0.0786171	0.0855145	0.0926579	0.100046	0.107677	0.115612	0.123968	0.132688	0.141705	0.150953
	9.79231	0.000494641	0.000502462	0.000508647	0.000513196	0.000516109	0.000517387	0.000517029	0.000515036	0.000511407	0.000506142	0.000499242	0.000453999	0.000123388	-0.000445619	-0.00113938	-0.00184424	-0.00244656	-0.0028327	-0.00288902	-0.00250186	-0.00155758	5.74563e-05	0.00233948	0.00512566	0.00837482	0.0120478	0.0161053	0.0205083	0.0252176	0.0301939	0.035398	0.0407909	0.0463415	0.0521398	0.0582155	0.0645609	0.0711684	0.0780304	0.0851393	0.0924875	0.100067	0.107871	0.115891	0.124186	0.132882	0.141922	0.151245	0.160788
	9.80178	0.000494641	0.000492525	0.000490851	0.00048962	0.000488832	0.000488486	0.000488583	0.000489122	0.000490104	0.000491529	0.000493397	0.000456253	0.000114588	-0.000481111	-0.0012087	-0.00194602	-0.00257092	-0.00296127	-0.00299491	-0.00254969	-0.00150346	0.000265923	0.00276096	0.00581399	0.00937557	0.0133983	0.0178347	0.0226374	0.027759	0.0331521	0.0387691	0.0445627	0.0504956	0.0566784	0.0631468	0.0698909	0.0769006	0.0841659	0.0916768	0.0994233	0.107395	0.115583	0.123976	0.132633	0.141683	0.151074	0.160741	0.170622
	9.81124	0.000494641	0.000481139	0.000470461	0.000462607	0.000457577	0.00045537	0.000455988	0.00045943	0.000465696	0.000474785	0.000486699	0.000458918	0.000105301	-0.000519739	-0.00128456	-0.00205754	-0.00270701	-0.00310136	-0.00310893	-0.0025981	-0.00143721	0.000505363	0.00324182	0.00660209	0.0105254	0.014953	0.0198261	0.0250859	0.0306736	0.0365303	0.0425974	0.048816	0.055139	0.0616948	0.0685282	0.0756309	0.0829946	0.090611	0.0984719	0.106569	0.114894	0.123439	0.132195	0.141224	0.150657	0.160437	0.170499	0.180775
	9.82071	0.000494641	0.000469119	0.000448934	0.000434087	0.000424578	0.000420408	0.000421576	0.000428082	0.000439926	0.000457108	0.000479628	0.000461536	9.35994e-05	-0.00056538	-0.00137314	-0.00218741	-0.00286595	-0.00326647	-0.00324672	-0.00266443	-0.00137735	0.000756787	0.00376307	0.007471	0.0118056	0.0166936	0.022062	0.0278375	0.0339469	0.0403172	0.0468751	0.0535475	0.0602746	0.0672004	0.0743814	0.0818147	0.0894972	0.097426	0.105598	0.11401	0.122659	0.131543	0.140658	0.15007	0.159912	0.170119	0.18062	0.191342
	9.83018	0.000494641	0.000455818	0.000425115	0.000402531	0.000388068	0.000381724	0.0003835	0.000393396	0.000411412	0.000437548	0.000471804	0.000464562	8.19105e-05	-0.000612656	-0.00146552	-0.00232307	-0.00303168	-0.00343774	-0.00338763	-0.00272773	-0.00130443	0.00103588	0.00433356	0.0084193	0.0132017	0.018591	0.0244976	0.0308316	0.0375033	0.044423	0.0515011	0.0586477	0.0657881	0.0730804	0.080595	0.0883366	0.0963103	0.104521	0.112973	0.121673	0.130624	0.139831	0.1493	0.159104	0.169373	0.180034	0.191008	0.202214
	9.83964	0.000494641	0.000440594	0.00039785	0.00036641	0.000346275	0.000337444	0.000339916	0.000353693	0.000378774	0.000415159	0.000462849	0.000468451	7.26639e-05	-0.00065619	-0.00155281	-0.00245191	-0.00318817	-0.00359631	-0.00351103	-0.00276703	-0.001199	0.00135834	0.00496214	0.00944558	0.0146995	0.0206163	0.0270882	0.0340076	0.0412668	0.0487582	0.0563742	0.0640069	0.0715655	0.0792205	0.0870574	0.0950907	0.103335	0.111806	0.120517	0.129483	0.138718	0.148239	0.158059	0.168259	0.178966	0.190099	0.201566	0.213279
	9.84911	0.000494641	0.000422801	0.000365985	0.000324196	0.000297431	0.000285693	0.00028898	0.000307292	0.00034063	0.000388993	0.000452382	0.000473657	6.82884e-05	-0.000690604	-0.00162612	-0.00256135	-0.00331939	-0.00372334	-0.0035963	-0.00276135	-0.00104161	0.00173984	0.00565766	0.0105484	0.0162847	0.0227403	0.0297891	0.0373049	0.0451617	0.0532331	0.0613932	0.0695158	0.0774927	0.0855062	0.0936573	0.101971	0.110474	0.11919	0.128146	0.137366	0.146877	0.156702	0.166869	0.177467	0.188617	0.200228	0.212198	0.224429
	9.85858	0.000494641	0.000401795	0.000328367	0.000274358	0.000239768	0.000224596	0.000228844	0.000252511	0.000295597	0.000358102	0.000440026	0.000480635	7.12132e-05	-0.00071052	-0.00167653	-0.0026388	-0.00340928	-0.00379996	-0.00362279	-0.00268975	-0.000812799	0.00219608	0.00642898	0.0117264	0.0179429	0.0249341	0.0325556	0.040663	0.049112	0.0577582	0.0664571	0.0750645	0.0834554	0.0918228	0.100283	0.108873	0.117628	0.126585	0.13578	0.14525	0.15503	0.165158	0.175669	0.186662	0.198251	0.210337	0.222808	0.235554
	9.86805	0.000494641	0.000376931	0.000283839	0.000215367	0.000171514	0.00015228	0.000157666	0.000187671	0.000242294	0.000321538	0.0004254	0.000489839	8.38673e-05	-0.00071056	-0.00169517	-0.00267168	-0.00344182	-0.00380731	-0.00356987	-0.00253124	-0.000493124	0.00274274	0.00728494	0.0129781	0.0196599	0.0271687	0.035343	0.0440213	0.053042	0.0622437	0.0714647	0.0805436	0.0893397	0.098056	0.106824	0.115689	0.124699	0.1339	0.143337	0.153059	0.163111	0.17354	0.184393	0.195775	0.207794	0.220341	0.233297	0.246544
	9.87751	0.000494641	0.000347565	0.00023125	0.000145695	9.09021e-05	6.687e-05	7.35989e-05	0.000111089	0.00017934	0.000278353	0.000408126	0.000501723	0.00010868	-0.000685347	-0.00167312	-0.0026474	-0.00340095	-0.00372654	-0.00341692	-0.00226487	-6.31324e-05	0.00339552	0.00823441	0.0143022	0.0214213	0.0294151	0.0381066	0.0473191	0.0568759	0.0666	0.0763148	0.0858435	0.0950312	0.104091	0.113167	0.122315	0.131589	0.141044	0.150736	0.160721	0.171052	0.181786	0.192978	0.204739	0.217171	0.230156	0.24357	0.257288
	9.88698	0.000494641	0.000313053	0.000169443	6.38128e-05	-3.83798e-06	-3.35094e-05	-2.52014e-05	2.1086e-05	0.000105353	0.000227599	0.000387824	0.000516743	0.000148079	-0.000629502	-0.00160149	-0.00255338	-0.00327065	-0.00353879	-0.0031433	-0.00186967	0.000496627	0.00417009	0.00928622	0.0156971	0.0232129	0.0316442	0.0408016	0.0504959	0.0605377	0.0707376	0.0809064	0.0908545	0.100416	0.109814	0.119203	0.128644	0.138199	0.147929	0.157895	0.168161	0.178785	0.189832	0.201361	0.213488	0.226307	0.239698	0.253531	0.267677
	9.89645	0.000494641	0.000272749	9.72653e-05	-3.18094e-05	-0.000114475	-0.000150732	-0.00014058	-8.40194e-05	1.89503e-05	0.000168329	0.000364116	0.000535352	0.000204495	-0.000537648	-0.00147138	-0.00237702	-0.00303486	-0.00322521	-0.00272838	-0.00132467	0.00120561	0.00508215	0.0104492	0.0171616	0.0250203	0.033827	0.0433835	0.0534912	0.0639518	0.0745669	0.0851382	0.0954672	0.10538	0.11511	0.124818	0.13457	0.14443	0.154463	0.164733	0.175305	0.186243	0.197612	0.209477	0.221953	0.235128	0.248881	0.263082	0.277602
	9.90592	0.000494641	0.00022513	1.1986e-05	-0.000144789	-0.000245195	-0.000289233	-0.000276903	-0.000208203	-8.31358e-05	9.83003e-05	0.000336105	0.000558416	0.000281628	-0.000402302	-0.00127089	-0.00210164	-0.00267209	-0.00275974	-0.0021421	-0.000596705	0.00209894	0.00616733	0.0117576	0.0187261	0.0268691	0.0359831	0.0458647	0.0563107	0.0671175	0.0780819	0.0890004	0.0996696	0.109912	0.11997	0.130012	0.140099	0.150297	0.160669	0.171279	0.182192	0.193471	0.205179	0.217382	0.23019	0.243685	0.25775	0.27226	0.28709
	9.91538	0.000494641	0.000167442	-9.13243e-05	-0.000281656	-0.000403554	-0.000457018	-0.000442048	-0.000358644	-0.000206807	1.34652e-05	0.000302171	0.000587228	0.000383545	-0.000216636	-0.000990147	-0.00171382	-0.00216449	-0.00211899	-0.00135415	0.000353192	0.00322621	0.00748807	0.01329	0.0204895	0.0288811	0.0382594	0.0484192	0.0591552	0.0702621	0.0815346	0.0927675	0.103756	0.11432	0.124716	0.13511	0.145562	0.156134	0.166885	0.177875	0.189165	0.200815	0.212885	0.225436	0.23857	0.252362	0.266701	0.281472	0.296562
	9.92485	0.000494641	0.000101391	-0.000209612	-0.000438366	-0.000584871	-0.000649127	-0.000631136	-0.000530895	-0.000348406	-8.36686e-05	0.000263317	0.000620827	0.000506175	1.11447e-05	-0.000642202	-0.00123181	-0.00153561	-0.00133154	-0.00039755	0.00148843	0.00454845	0.00900458	0.0150077	0.0224164	0.031026	0.0406317	0.0510291	0.0620136	0.0733805	0.0849254	0.0964436	0.107731	0.118609	0.129346	0.140108	0.150947	0.161919	0.173078	0.184478	0.196173	0.208218	0.220666	0.233572	0.247026	0.261092	0.275674	0.290669	0.305975
	9.93432	0.000494641	2.90626e-05	-0.00033914	-0.000609967	-0.000783418	-0.000859493	-0.000838192	-0.000719515	-0.000503462	-0.000190033	0.000220772	0.000658067	0.000644817	0.000271732	-0.000241726	-0.000676098	-0.00081192	-0.000429732	0.000689927	0.00276652	0.00601951	0.0106683	0.0168615	0.0244588	0.0332582	0.0430578	0.0536561	0.0648513	0.0764417	0.0882256	0.100001	0.111567	0.122749	0.133827	0.144963	0.156203	0.167592	0.179179	0.191008	0.203126	0.21558	0.228415	0.241677	0.255444	0.269766	0.284564	0.29975	0.31524
	9.94379	0.000494641	-4.74562e-05	-0.000476174	-0.000791512	-0.00099347	-0.00108205	-0.00105725	-0.000919064	-0.000667503	-0.000302561	0.00017576	0.000697802	0.000794774	0.00055582	0.000196605	-6.72013e-05	-1.9933e-05	0.000554078	0.0018705	0.004145	0.00759324	0.0124309	0.0188025	0.0265688	0.0355321	0.0454955	0.0562618	0.0676338	0.0794145	0.0914068	0.103414	0.115238	0.126711	0.138123	0.149633	0.161277	0.173092	0.185115	0.197383	0.209933	0.222801	0.236025	0.249642	0.263711	0.278274	0.293266	0.30862	0.324266
	9.95325	0.000494641	-0.00012608	-0.000616977	-0.00097805	-0.0012093	-0.00131072	-0.00128232	-0.0011241	-0.000836055	-0.000418184	0.000129511	0.000738886	0.000951347	0.0008541	0.000658118	0.00057438	0.00081386	0.00158754	0.00310638	0.00558138	0.00922349	0.0142437	0.0207815	0.0286982	0.0378024	0.0479026	0.0588078	0.0703266	0.0822679	0.0944405	0.106653	0.118714	0.130463	0.142199	0.154076	0.16612	0.178358	0.190816	0.203521	0.216501	0.229782	0.24339	0.257354	0.271715	0.286505	0.301676	0.317179	0.332964
	9.96272	0.000494641	-0.000204722	-0.000757813	-0.00116463	-0.00142518	-0.00153945	-0.00150746	-0.00132919	-0.00100465	-0.000533834	8.32514e-05	0.000780173	0.00110984	0.00115726	0.00112814	0.00122814	0.00166296	0.00263829	0.0043598	0.00703318	0.0108641	0.0160583	0.0227493	0.0307993	0.0400234	0.050237	0.0612558	0.0728952	0.0849708	0.0972981	0.109693	0.12197	0.133975	0.14602	0.158249	0.17068	0.183328	0.19621	0.209342	0.222741	0.236423	0.250404	0.264702	0.279343	0.294348	0.309687	0.325329	0.341242
	9.97219	0.000494641	-0.000281296	-0.000894946	-0.00134631	-0.00163538	-0.00176217	-0.00172667	-0.00152888	-0.00116881	-0.000646443	3.82078e-05	0.000820516	0.00126555	0.00145601	0.00159199	0.00187358	0.00250088	0.00367398	0.00559297	0.00845794	0.012469	0.0178262	0.0246568	0.0328239	0.0421496	0.0524566	0.0635675	0.0753051	0.0874921	0.0999511	0.112505	0.124976	0.137218	0.149549	0.16211	0.174905	0.187942	0.201226	0.214763	0.228561	0.242624	0.25696	0.271575	0.286482	0.301693	0.317195	0.332973	0.349012
	9.98166	0.000494641	-0.000353716	-0.00102464	-0.00151813	-0.00183418	-0.0019728	-0.00193399	-0.00171774	-0.00132406	-0.000752943	-4.39242e-06	0.000858771	0.00141378	0.00174102	0.002035	0.0024902	0.00330112	0.00466226	0.00676811	0.00981317	0.0139919	0.0194989	0.026455	0.0347242	0.0441355	0.054519	0.0657045	0.0775218	0.0898007	0.102371	0.115063	0.127706	0.14016	0.152753	0.165615	0.178745	0.192138	0.205792	0.219704	0.23387	0.248287	0.262952	0.277862	0.293018	0.308429	0.324094	0.340012	0.356182
	9.99112	0.000494641	-0.000419896	-0.00114316	-0.00167514	-0.00201585	-0.00216529	-0.00212345	-0.00189033	-0.00146594	-0.000850267	-4.3322e-05	0.000893791	0.00154983	0.002003	0.00244249	0.00305748	0.00403718	0.00557077	0.00784745	0.0110564	0.0153868	0.0210279	0.0280947	0.036452	0.0459357	0.0563823	0.0676285	0.0795106	0.0918654	0.104529	0.117339	0.130131	0.142773	0.155595	0.168724	0.182148	0.195857	0.209839	0.224082	0.238577	0.25331	0.268272	0.283451	0.29884	0.314446	0.33028	0.346349	0.362662
	10.0006	0.000494641	-0.000477765	-0.00124679	-0.00181244	-0.00217471	-0.0023336	-0.00228911	-0.00204124	-0.00158999	-0.000935368	-7.73631e-05	0.000924436	0.00166904	0.0022327	0.00279989	0.00355509	0.00468277	0.0063674	0.00879347	0.0121454	0.0166078	0.022365	0.0295272	0.0379598	0.0475048	0.0580045	0.0693012	0.0812373	0.0936553	0.106398	0.119306	0.132224	0.145024	0.15804	0.171392	0.185064	0.199037	0.213294	0.227818	0.242591	0.257596	0.272815	0.288232	0.303834	0.319634	0.335647	0.351885	0.368363
	10.0101	0.000494641	-0.000529667	-0.00133975	-0.0019356	-0.00231722	-0.00248461	-0.00243778	-0.00217671	-0.00170142	-0.0010119	-0.000108151	0.000951746	0.00177692	0.0024417	0.0031259	0.00400934	0.00527185	0.00709324	0.00965334	0.013132	0.0177089	0.0235641	0.0308025	0.0392907	0.0488761	0.059407	0.0707314	0.0826976	0.0951536	0.107948	0.120928	0.133942	0.14687	0.160043	0.173578	0.187453	0.201645	0.216132	0.230892	0.245903	0.261142	0.276589	0.292219	0.308023	0.324022	0.340231	0.356665	0.373336
	10.0195	0.000494641	-0.000578511	-0.00142723	-0.00205152	-0.00245138	-0.00262681	-0.00257781	-0.00230438	-0.00180651	-0.00108422	-0.000137494	0.000977222	0.00188011	0.00264339	0.0034418	0.00445008	0.00584297	0.0077952	0.0104815	0.0140767	0.0187553	0.0246923	0.0319871	0.0405071	0.0501061	0.0606387	0.0719595	0.0839229	0.0963836	0.109196	0.122215	0.135295	0.14832	0.16162	0.175305	0.18935	0.203727	0.218411	0.233377	0.248597	0.264045	0.279696	0.295524	0.311521	0.327725	0.344148	0.360798	0.377687
	10.029	0.000494641	-0.000624346	-0.00150933	-0.00216032	-0.00257731	-0.0027603	-0.0027093	-0.00242429	-0.00190529	-0.00115228	-0.000165278	0.00100103	0.00197858	0.00283737	0.00374671	0.00487594	0.00639439	0.00847139	0.0112763	0.0149783	0.0197469	0.0257514	0.0330852	0.0416165	0.051206	0.0617152	0.0730055	0.0849384	0.0973752	0.110177	0.123207	0.136324	0.149421	0.16282	0.176626	0.19081	0.205342	0.220194	0.235335	0.250737	0.26637	0.282205	0.298213	0.314393	0.330802	0.347445	0.364326	0.381447
	10.0385	0.000494641	-0.000667221	-0.00158614	-0.00226211	-0.00269513	-0.0028852	-0.00283233	-0.00253652	-0.00199775	-0.00121604	-0.000191386	0.00102334	0.00207233	0.00302323	0.00403975	0.00528557	0.00692439	0.0091199	0.0120358	0.0158358	0.0206836	0.0267428	0.0341007	0.0426261	0.0521871	0.0626522	0.07389	0.0857693	0.0981586	0.110927	0.123942	0.137073	0.150218	0.163692	0.177593	0.191889	0.206549	0.221541	0.236832	0.25239	0.268184	0.284182	0.300351	0.3167	0.333308	0.350174	0.367289	0.384646
	10.0479	0.000494641	-0.000707186	-0.00165773	-0.00235698	-0.00280494	-0.00300162	-0.00294701	-0.00264112	-0.00208393	-0.00127546	-0.000215705	0.00104433	0.00216133	0.00320058	0.00432002	0.00567759	0.00743122	0.00973885	0.0127584	0.0166479	0.0215651	0.0276681	0.0350376	0.0435433	0.0530605	0.0634651	0.0746331	0.0864406	0.0987636	0.111478	0.12446	0.137585	0.150758	0.164284	0.178258	0.192643	0.207406	0.222513	0.23793	0.253621	0.269553	0.285692	0.302002	0.318504	0.335301	0.352381	0.369725	0.387315
	10.0574	0.000494641	-0.00074429	-0.00172419	-0.00244505	-0.00290688	-0.00310967	-0.00305343	-0.00273815	-0.00216384	-0.0013305	-0.000238119	0.00106415	0.00224556	0.003369	0.00458665	0.00605064	0.00791315	0.0103263	0.0134424	0.0174134	0.0223915	0.028529	0.0359001	0.0443754	0.0538375	0.0641696	0.0752553	0.0869777	0.0992203	0.111866	0.124799	0.137903	0.151086	0.164647	0.178673	0.193127	0.207972	0.223173	0.238692	0.254494	0.270543	0.286801	0.303233	0.319869	0.336838	0.354117	0.371676	0.389484
	10.0669	0.000494641	-0.000778583	-0.00178561	-0.00252643	-0.00300104	-0.00320946	-0.00315168	-0.00282769	-0.0022375	-0.00138111	-0.000258512	0.00108298	0.002325	0.0035281	0.00483873	0.00640336	0.00836845	0.0108805	0.0140859	0.0181311	0.0231626	0.0293269	0.0366921	0.0451296	0.0545292	0.0647814	0.0757767	0.0874056	0.0995587	0.112126	0.124999	0.138068	0.151249	0.16483	0.178892	0.193396	0.208305	0.22358	0.239183	0.255076	0.27122	0.287576	0.304108	0.320856	0.337974	0.35543	0.373181	0.391183
	10.0763	0.000494641	-0.000810114	-0.00184207	-0.00260122	-0.00308756	-0.0033011	-0.00324184	-0.00290978	-0.00230491	-0.00142724	-0.000276769	0.00110098	0.00239964	0.00367746	0.0050754	0.00673439	0.00879538	0.0113993	0.0146872	0.0187999	0.0238783	0.0300636	0.0374176	0.0458133	0.055147	0.065316	0.0762177	0.0877495	0.0998087	0.112293	0.125099	0.138124	0.151292	0.16488	0.178965	0.193507	0.208464	0.223798	0.239466	0.255431	0.27165	0.288084	0.304692	0.321528	0.338768	0.35637	0.37428	0.392444
	10.0858	0.000494641	-0.000838933	-0.00189366	-0.00266953	-0.00316655	-0.00338471	-0.00332403	-0.00298449	-0.00236611	-0.00146887	-0.000292776	0.00111833	0.00246945	0.00381669	0.00529575	0.00704235	0.00919221	0.011881	0.0152446	0.0194185	0.0245385	0.0307404	0.0380808	0.0464338	0.055702	0.065789	0.0765987	0.0880346	0.1	0.1124	0.125136	0.138114	0.151261	0.164848	0.178947	0.193514	0.208508	0.223886	0.239605	0.255624	0.2719	0.28839	0.305052	0.321947	0.339276	0.356986	0.375014	0.393296
	10.0953	0.000494641	-0.000865089	-0.00194046	-0.00273147	-0.00323811	-0.0034604	-0.00339833	-0.00305189	-0.00242109	-0.00150594	-0.000306417	0.00113519	0.00253442	0.00394537	0.00549891	0.00732589	0.00955721	0.0123237	0.0157563	0.0199858	0.0251431	0.0313591	0.0386857	0.0469984	0.0562054	0.0662161	0.0769398	0.0882859	0.100164	0.112482	0.125152	0.13808	0.151202	0.164783	0.178888	0.193474	0.208495	0.223907	0.239664	0.255722	0.272035	0.28856	0.305251	0.322176	0.339554	0.357327	0.375422	0.393769
	10.1047	0.000494641	-0.000889337	-0.00198382	-0.00278881	-0.0033043	-0.0035303	-0.00346681	-0.00311382	-0.00247133	-0.00153935	-0.000317877	0.00115226	0.0025963	0.00406647	0.0056892	0.00759089	0.00989795	0.0127368	0.0162338	0.0205154	0.0257081	0.0319381	0.0392536	0.0475318	0.0566859	0.06663	0.0772783	0.0885449	0.100344	0.11259	0.125196	0.138077	0.151171	0.16474	0.178848	0.193445	0.208484	0.223918	0.239699	0.255779	0.272111	0.288646	0.305338	0.322259	0.339641	0.357423	0.375527	0.393878
	10.1142	0.000494641	-0.000915292	-0.0020302	-0.00285009	-0.00337495	-0.0036048	-0.00353962	-0.00317941	-0.00252419	-0.00157394	-0.000328665	0.00117228	0.00266407	0.00419707	0.00589311	0.00787402	0.0102616	0.0131778	0.0167443	0.021083	0.0263157	0.0325643	0.039874	0.0481253	0.0572352	0.067122	0.0777038	0.0888987	0.100625	0.1128	0.125344	0.138172	0.151228	0.164772	0.178864	0.193452	0.208487	0.223917	0.239693	0.255764	0.27208	0.28859	0.305244	0.322117	0.339454	0.357189	0.375244	0.393539
	10.1237	0.000494641	-0.000941996	-0.0020779	-0.00291306	-0.00344748	-0.00368116	-0.00361411	-0.00324632	-0.00257779	-0.00160852	-0.000338511	0.00119439	0.0027355	0.00433325	0.00610481	0.00816735	0.010638	0.013634	0.0172725	0.0216706	0.0269455	0.0332144	0.0405205	0.0487487	0.0578194	0.0676541	0.0781743	0.0893014	0.100957	0.113062	0.125539	0.138308	0.151314	0.164819	0.178877	0.193437	0.208444	0.223846	0.23959	0.255622	0.27189	0.288341	0.304922	0.321711	0.338959	0.356602	0.374557	0.392743
	10.1331	0.000494641	-0.000967711	-0.0021238	-0.00297361	-0.00351716	-0.00375444	-0.00368546	-0.0033102	-0.00262868	-0.00164089	-0.000346826	0.00121715	0.0028064	0.00446745	0.00631283	0.00845511	0.0110068	0.0140805	0.0177887	0.0222441	0.027559	0.0338461	0.0411473	0.0493523	0.0583845	0.0681682	0.0786275	0.0896868	0.10127	0.113302	0.125707	0.138409	0.151355	0.164807	0.178817	0.193331	0.208292	0.223644	0.239333	0.255303	0.271498	0.287863	0.304342	0.321014	0.338139	0.35565	0.373464	0.3915
	10.1426	0.000494641	-0.0009907	-0.0021648	-0.00302767	-0.00357929	-0.00381968	-0.00374882	-0.00336673	-0.0026734	-0.00166883	-0.000353019	0.00123911	0.00287258	0.00459207	0.00650569	0.00872153	0.0113477	0.0144923	0.0182635	0.0227693	0.0281179	0.0344173	0.0417085	0.0498863	0.0588765	0.0686059	0.0790012	0.0899892	0.101496	0.11345	0.125776	0.138402	0.151277	0.164664	0.178613	0.193066	0.207965	0.223252	0.238869	0.254758	0.270859	0.287116	0.303471	0.320001	0.336975	0.354323	0.371965	0.389816
	10.1521	0.000494641	-0.00100922	-0.00219781	-0.00307112	-0.00362915	-0.00387191	-0.00379938	-0.00341158	-0.0027085	-0.00169014	-0.000356503	0.00125883	0.00292986	0.00469956	0.0066719	0.00895085	0.0116404	0.0148445	0.0186671	0.0232122	0.0285838	0.0348859	0.0421583	0.0503008	0.0592414	0.0689092	0.0792331	0.0901424	0.101566	0.113433	0.125672	0.138212	0.151006	0.164317	0.178193	0.192575	0.207401	0.22261	0.238142	0.253935	0.269929	0.286063	0.302276	0.318647	0.335449	0.352613	0.370058	0.387702
	10.1615	0.000494641	-0.00102155	-0.00221972	-0.00309988	-0.00366203	-0.00390617	-0.0038323	-0.00344041	-0.00273052	-0.00170261	-0.000356686	0.00127486	0.00297404	0.00478232	0.00679998	0.00912728	0.0118645	0.015112	0.01897	0.0235387	0.0289185	0.0352097	0.042451	0.050546	0.0594251	0.0690197	0.0792611	0.0900805	0.101409	0.113179	0.12532	0.137765	0.150467	0.163693	0.177488	0.19179	0.206534	0.221657	0.237096	0.252785	0.268662	0.284664	0.300725	0.316926	0.333543	0.350509	0.367743	0.385163
	10.171	0.000494641	-0.00102593	-0.00222743	-0.00310986	-0.00367322	-0.00391752	-0.00384275	-0.00344891	-0.002736	-0.00170402	-0.00035298	0.00128575	0.00300095	0.0048328	0.00687845	0.00923507	0.0119998	0.0152699	0.0191424	0.0237146	0.0290835	0.0353465	0.0425406	0.0505721	0.0593737	0.0688794	0.0790227	0.0897375	0.100957	0.112616	0.124648	0.136986	0.149587	0.162719	0.176427	0.190643	0.205301	0.220334	0.235675	0.251258	0.267016	0.282881	0.298787	0.314813	0.331239	0.348001	0.365018	0.38221
	10.1805	0.000494641	-0.00102063	-0.00221783	-0.00309695	-0.003658	-0.00390098	-0.00382589	-0.00343273	-0.00272149	-0.00169218	-0.000344795	0.00129005	0.0030064	0.0048434	0.00689583	0.00925843	0.012026	0.0152932	0.0191549	0.0237057	0.0290406	0.0352541	0.0423814	0.0503292	0.0590332	0.0684299	0.0784558	0.0890475	0.100141	0.111674	0.123581	0.135801	0.148291	0.161323	0.174939	0.189067	0.203637	0.218581	0.233826	0.249304	0.264944	0.280676	0.296429	0.312282	0.32852	0.345081	0.361884	0.378849
	10.1899	0.000494641	-0.00100391	-0.00218782	-0.00305707	-0.00361167	-0.00385161	-0.0037769	-0.00338754	-0.00268353	-0.00166486	-0.000331541	0.00128633	0.0029862	0.00480657	0.00684064	0.0091816	0.0119226	0.0151569	0.0189777	0.0234781	0.0287513	0.0348906	0.0419275	0.0497675	0.0583495	0.0676131	0.0774982	0.0879444	0.0988915	0.110279	0.122047	0.134135	0.146506	0.159432	0.172953	0.186993	0.201479	0.216337	0.231493	0.246873	0.262404	0.27801	0.293619	0.309308	0.325367	0.341737	0.358337	0.37509
	10.1994	0.000494641	-0.000974046	-0.0021343	-0.00298611	-0.00352949	-0.00376444	-0.00369095	-0.00330902	-0.00261866	-0.00161986	-0.000312629	0.00127313	0.00293616	0.00471471	0.0067014	0.0089888	0.0116695	0.0148361	0.0185813	0.0229975	0.0281774	0.0342135	0.0411331	0.0488373	0.0572686	0.0663709	0.0760876	0.0863623	0.0971388	0.108361	0.119972	0.131915	0.144158	0.156974	0.170398	0.184354	0.198761	0.213542	0.22862	0.243915	0.259349	0.274846	0.290325	0.305864	0.321763	0.337961	0.354379	0.37094
	10.2089	0.000494641	-0.000927324	-0.00205065	-0.00287533	-0.00340138	-0.00362878	-0.00355754	-0.00318767	-0.00251915	-0.00155199	-0.000286197	0.00124804	0.00284745	0.00455068	0.00645125	0.00864267	0.0112184	0.0142721	0.0178971	0.022187	0.0272354	0.0331356	0.0399092	0.0474497	0.0557039	0.0646195	0.0741446	0.084227	0.0948146	0.105855	0.117297	0.129087	0.141197	0.153904	0.167239	0.181119	0.195461	0.210181	0.225197	0.240424	0.255781	0.271184	0.286549	0.301953	0.317704	0.333743	0.349992	0.366375
	10.2183	0.000494641	-0.000862775	-0.00193512	-0.0027224	-0.00322461	-0.00344175	-0.00337382	-0.00302082	-0.00238275	-0.00145962	-0.000251413	0.00121078	0.00271778	0.00430936	0.00608175	0.0081312	0.0105539	0.0134462	0.0169042	0.0210242	0.0259023	0.031635	0.0382371	0.0455913	0.0536482	0.06236	0.0716787	0.0815563	0.091945	0.102797	0.114064	0.125698	0.137675	0.150277	0.16353	0.177347	0.191637	0.206312	0.221282	0.236458	0.251752	0.267073	0.282333	0.297606	0.31321	0.329088	0.345165	0.361365
	10.2278	0.000494641	-0.000783854	-0.0017939	-0.00253548	-0.00300862	-0.00321329	-0.00314952	-0.00281729	-0.00221661	-0.00134747	-0.000209875	0.00116377	0.00255542	0.00400654	0.00561744	0.00748844	0.00971985	0.012412	0.0156651	0.0195796	0.0242558	0.0297939	0.036202	0.0433488	0.0511892	0.0596794	0.0687759	0.0784347	0.0886124	0.099265	0.110349	0.121821	0.13366	0.146156	0.159331	0.17309	0.187336	0.201975	0.216909	0.232044	0.247283	0.26253	0.27769	0.292835	0.308292	0.324007	0.339908	0.355923
	10.2373	0.000494641	-0.000694029	-0.00163317	-0.00232278	-0.00276286	-0.00295341	-0.00289442	-0.00258591	-0.00202787	-0.0012203	-0.000163192	0.00110943	0.00236868	0.00365808	0.00508294	0.00674856	0.00876023	0.0112233	0.0142429	0.0179246	0.0223735	0.027695	0.0338892	0.0408094	0.0484146	0.0566654	0.0655227	0.0749469	0.084899	0.0953395	0.106229	0.117529	0.129223	0.141608	0.154702	0.168403	0.182607	0.197211	0.212113	0.227209	0.242397	0.257573	0.272634	0.287651	0.30296	0.318511	0.334235	0.350062
	10.2467	0.000494641	-0.000596766	-0.00145914	-0.00209248	-0.00249679	-0.00267207	-0.00261832	-0.00233553	-0.00182371	-0.00108286	-0.000112969	0.00105018	0.00216585	0.00327984	0.00450287	0.00594572	0.00771911	0.0099338	0.0127005	0.0161301	0.0203332	0.0254206	0.0313841	0.0380602	0.0454122	0.0534055	0.0620055	0.0711776	0.0808872	0.0910998	0.101781	0.112895	0.124434	0.136698	0.149704	0.16334	0.177496	0.192062	0.206927	0.221982	0.237116	0.252218	0.267179	0.282066	0.297226	0.312611	0.328157	0.343797
	10.2562	0.000494641	-0.000495534	-0.00127801	-0.0018528	-0.00221989	-0.00237928	-0.00233098	-0.00207498	-0.00161129	-0.000939898	-6.0814e-05	0.000988431	0.00195524	0.00288765	0.00390186	0.00511408	0.00664053	0.00859739	0.0111009	0.0142672	0.0182126	0.0230533	0.0287722	0.0351883	0.0422697	0.049987	0.0583107	0.0672114	0.0766595	0.0866256	0.0970802	0.107994	0.119362	0.131493	0.144396	0.157955	0.172051	0.186567	0.201386	0.21639	0.231461	0.246483	0.261338	0.27609	0.291098	0.306318	0.321686	0.337139
	10.2657	0.000494641	-0.000393798	-0.00109598	-0.00161192	-0.00194159	-0.00208502	-0.00204219	-0.00181311	-0.00139777	-0.000796177	-8.33276e-06	0.00092661	0.00174514	0.00249737	0.00330453	0.00428783	0.00556852	0.00726781	0.00950693	0.0124071	0.0160896	0.0206756	0.0261388	0.0322807	0.0390749	0.0464976	0.0545249	0.063133	0.0722981	0.0819965	0.0922043	0.102898	0.114078	0.126057	0.13884	0.152302	0.16632	0.180768	0.195523	0.21046	0.225456	0.240385	0.255124	0.269737	0.28459	0.299642	0.314834	0.330103
	10.2751	0.000494641	-0.000295027	-0.000919252	-0.00137804	-0.00167138	-0.00179928	-0.00176173	-0.00155875	-0.00119032	-0.000656446	4.28677e-05	0.000867132	0.00154386	0.00212486	0.0027355	0.00350113	0.00454712	0.00599882	0.0079816	0.0106208	0.0140418	0.01837	0.0235693	0.0294247	0.0359156	0.0430246	0.0507343	0.0590271	0.0678855	0.0772922	0.0872294	0.0976799	0.108651	0.120456	0.133095	0.146436	0.160349	0.174705	0.189372	0.204221	0.219121	0.233941	0.248552	0.263016	0.27771	0.292595	0.307612	0.322702
	10.2846	0.000494641	-0.000202687	-0.000754019	-0.00115935	-0.00141869	-0.00153204	-0.00149939	-0.00132074	-0.000996095	-0.000525455	9.11806e-05	0.000812418	0.00135969	0.00178596	0.00221939	0.00278814	0.00362036	0.00484421	0.00658784	0.00897943	0.0121471	0.016219	0.0211492	0.0267072	0.0328795	0.0396557	0.0470255	0.0549784	0.0635041	0.0725922	0.0822323	0.0924141	0.103152	0.114756	0.127221	0.14041	0.154188	0.168419	0.182968	0.1977	0.212479	0.227169	0.241635	0.25594	0.270469	0.285187	0.300033	0.31495
	10.2941	0.000494641	-0.000120245	-0.000606483	-0.00096407	-0.00119301	-0.0012933	-0.00126494	-0.00110793	-0.000822268	-0.000407959	0.000134999	0.000764886	0.00120093	0.00149652	0.00178083	0.00218303	0.00283228	0.00385775	0.00538861	0.00755404	0.0104832	0.0143052	0.0189638	0.0242154	0.0300543	0.0364783	0.0434848	0.0510715	0.0592361	0.0679762	0.0772895	0.0871736	0.0976498	0.109023	0.121279	0.134279	0.147882	0.161951	0.176345	0.190925	0.205551	0.220085	0.234387	0.248519	0.262879	0.277429	0.292109	0.306859
	10.3036	0.000494641	-5.02142e-05	-0.000481134	-0.000798118	-0.00100117	-0.00109028	-0.00106545	-0.000926693	-0.000673997	-0.000307365	0.000173202	0.000726365	0.00107391	0.00126875	0.00143887	0.00171225	0.0022169	0.0030808	0.00443194	0.00639831	0.00910791	0.0126887	0.0170735	0.0220085	0.0274969	0.0335454	0.0401609	0.0473502	0.0551201	0.0634775	0.0724291	0.0819818	0.0921649	0.103271	0.11528	0.128048	0.141435	0.155298	0.169495	0.183884	0.198325	0.212673	0.226789	0.240737	0.254922	0.269306	0.283826	0.298421
	10.313	0.000494641	1.49247e-05	-0.000364521	-0.000643696	-0.0008226	-0.000901233	-0.000879596	-0.000757687	-0.000535507	-0.000213057	0.000209664	0.000692323	0.000963489	0.00107477	0.00115105	0.0013172	0.00169808	0.00241857	0.00360354	0.00537786	0.00786642	0.0111941	0.0152807	0.0198625	0.0249539	0.0305733	0.0367392	0.0434699	0.0507839	0.0586996	0.0672352	0.0764094	0.0862612	0.0970666	0.108795	0.121302	0.134444	0.148076	0.162055	0.176237	0.190477	0.204631	0.218556	0.23232	0.246342	0.260577	0.274962	0.289428
	10.3225	0.000494641	7.73384e-05	-0.000252771	-0.000495686	-0.000651407	-0.000719934	-0.000701267	-0.000595406	-0.000402351	-0.000122102	0.000245341	0.000661159	0.000864113	0.000903878	0.000900638	0.000974578	0.00124588	0.00183473	0.0028613	0.00444579	0.00670838	0.00976925	0.0135335	0.0177272	0.0223784	0.0275191	0.0331816	0.039398	0.0462003	0.0536207	0.0616913	0.0704443	0.0799304	0.0904041	0.101824	0.114043	0.126917	0.140298	0.154041	0.168	0.182029	0.195981	0.209711	0.223293	0.23716	0.251264	0.265533	0.279894
	10.332	0.000494641	0.000136747	-0.000146386	-0.000354759	-0.000488372	-0.000547224	-0.000531316	-0.000440647	-0.000275217	-3.50272e-05	0.000279923	0.000632741	0.000775147	0.000754353	0.000684579	0.000680047	0.000854979	0.0013236	0.00220012	0.00359877	0.00563377	0.00841934	0.0118445	0.0156259	0.0198063	0.024433	0.0295535	0.0352149	0.0414646	0.0483498	0.055918	0.0642164	0.0733086	0.0834237	0.0945081	0.106414	0.118995	0.132102	0.145588	0.159306	0.173107	0.186846	0.200372	0.21377	0.227486	0.241466	0.255632	0.269903
	10.3414	0.000494641	0.000192872	-4.58725e-05	-0.000221591	-0.000334283	-0.00038395	-0.000370591	-0.000294206	-0.000154796	4.76404e-05	0.000313102	0.000606938	0.000695954	0.00062449	0.000499831	0.000429257	0.000520051	0.000879494	0.00161487	0.00283346	0.00464254	0.0071494	0.0102265	0.0135817	0.0172735	0.0213652	0.0259201	0.0310013	0.0366723	0.0429961	0.0500362	0.0578558	0.0665317	0.0762649	0.0869893	0.0985566	0.110818	0.123626	0.136831	0.150286	0.163841	0.177348	0.19066	0.203864	0.217426	0.231283	0.245349	0.259536
	10.3509	0.000494641	0.000245432	4.82667e-05	-9.68531e-05	-0.000189928	-0.000230958	-0.000219942	-0.000156882	-4.17764e-05	0.000125374	0.00034457	0.00058362	0.000625893	0.000512583	0.000343351	0.000217859	0.000235769	0.000496742	0.00110044	0.00214652	0.00373466	0.0059645	0.00869222	0.0116179	0.0148161	0.0183659	0.0223468	0.026838	0.0319188	0.0376687	0.0441668	0.0514925	0.0597358	0.0690675	0.079409	0.0906119	0.102528	0.115009	0.127906	0.141071	0.154356	0.167612	0.180691	0.19369	0.207088	0.220815	0.234777	0.248875
	10.3604	0.000494641	0.000294147	0.000135527	1.87801e-05	-5.60929e-05	-8.90923e-05	-8.0218e-05	-2.94701e-05	6.31516e-05	0.000197647	0.000374016	0.000562654	0.000564327	0.000416922	0.000212096	4.15045e-05	-3.19377e-06	0.000169658	0.000651717	0.00153464	0.00291009	0.00486971	0.00725425	0.00975775	0.0124698	0.0154853	0.018899	0.0228055	0.0272997	0.0324764	0.0384304	0.0452563	0.0530569	0.0619711	0.0719086	0.0827222	0.0942647	0.106389	0.118948	0.131794	0.144781	0.15776	0.170586	0.183362	0.19658	0.210162	0.224005	0.238005
	10.3698	0.000494641	0.000338739	0.000215404	0.000124636	6.64344e-05	4.08e-05	4.77326e-05	8.72322e-05	0.000159299	0.000263932	0.000401133	0.000543909	0.000510618	0.000335801	0.000103021	-0.000104155	-0.000202163	-0.000107437	0.000263586	0.000994473	0.00216879	0.0038701	0.00592531	0.00802433	0.0102708	0.0127737	0.015642	0.0189845	0.0229104	0.0275286	0.0329479	0.0392775	0.046631	0.0551155	0.0646298	0.0750292	0.0861692	0.0979051	0.110092	0.122586	0.135242	0.147916	0.160462	0.172993	0.186008	0.199424	0.213127	0.227006
	10.3793	0.000494641	0.000378928	0.000287394	0.00022004	0.000176867	0.000157874	0.000163061	0.000192428	0.000245975	0.000323703	0.000425611	0.000527254	0.000464126	0.000267509	1.30844e-05	-0.000223467	-0.000366464	-0.000340224	-6.90674e-05	0.000522689	0.00151073	0.00297072	0.0047181	0.00644089	0.00825486	0.0102812	0.0126411	0.0154558	0.0188464	0.0229341	0.0278402	0.0336858	0.0405941	0.0486403	0.057714	0.0676748	0.0783823	0.0896958	0.101475	0.113579	0.125868	0.138201	0.150438	0.162697	0.175481	0.1887	0.202233	0.215961
	10.3888	0.000494641	0.000414432	0.000350992	0.00030432	0.000274417	0.000261283	0.000264917	0.00028532	0.000322492	0.000376433	0.000447142	0.000512558	0.000424214	0.000210341	-6.07584e-05	-0.000320781	-0.000501423	-0.000534384	-0.000351359	0.000115955	0.000935859	0.00217666	0.00364529	0.00503063	0.00645796	0.00805809	0.00996178	0.0122998	0.015203	0.0188022	0.023228	0.0286114	0.0350824	0.0426852	0.0513029	0.0608008	0.0710446	0.0818995	0.0932311	0.104905	0.116786	0.128741	0.140634	0.152589	0.165107	0.17809	0.191414	0.204954
	10.3982	0.000494641	0.000444974	0.000405694	0.000376802	0.000358298	0.000350182	0.000352453	0.000365112	0.000388159	0.000421594	0.000465417	0.00049969	0.000390242	0.000162587	-0.000121551	-0.000400444	-0.000612367	-0.000695595	-0.000588402	-0.000229061	0.000444152	0.00149296	0.00271958	0.00381675	0.00491605	0.00615455	0.0076693	0.00959738	0.0120758	0.0152417	0.0192322	0.0241842	0.0302317	0.0373899	0.0455379	0.054549	0.0642969	0.0746548	0.0854963	0.0966949	0.108124	0.119657	0.131167	0.142782	0.154992	0.167695	0.180763	0.194066
	10.4077	0.000494641	0.000469431	0.000449493	0.000434829	0.000425437	0.000421317	0.000422471	0.000428897	0.000440596	0.000457567	0.000479812	0.000489316	0.000364854	0.000129479	-0.000161041	-0.000450935	-0.000684435	-0.00080577	-0.000759171	-0.000488868	6.09083e-05	0.000945928	0.00196787	0.00282723	0.00365828	0.00460075	0.00579431	0.00737869	0.00949357	0.0122787	0.0158737	0.0204183	0.0260467	0.0327457	0.0403934	0.0488742	0.0580726	0.067873	0.0781598	0.0888175	0.0997305	0.110783	0.12186	0.133089	0.144943	0.157317	0.17008	0.183098
	10.4172	0.000494641	0.000486622	0.00048028	0.000475615	0.000472627	0.000471317	0.000471684	0.000473728	0.000477449	0.000482848	0.000489924	0.000482631	0.000352981	0.000121509	-0.000162106	-0.000448184	-0.000687044	-0.000829007	-0.000824394	-0.000623524	-0.000176717	0.000565706	0.00140865	0.00206471	0.00266801	0.00335789	0.00427373	0.00555486	0.00734065	0.00977045	0.0129836	0.0171195	0.0223096	0.0285091	0.035598	0.0434758	0.0520418	0.0611953	0.0708358	0.0808625	0.0911749	0.101672	0.112254	0.123049	0.134502	0.146504	0.158922	0.171623
	10.4266	0.000494641	0.000497605	0.000499948	0.000501672	0.000502776	0.00050326	0.000503124	0.000502369	0.000500994	0.000498999	0.000496385	0.00047909	0.000352493	0.000134586	-0.000131099	-0.000401031	-0.00063168	-0.000779513	-0.000801001	-0.000652612	-0.000290815	0.000327921	0.00101486	0.00149827	0.00190968	0.00238558	0.00306246	0.00407683	0.00556519	0.00766404	0.0105099	0.0142392	0.0189781	0.0246484	0.0311343	0.0383534	0.046223	0.0546603	0.0635828	0.0729079	0.0825528	0.0924349	0.102472	0.112792	0.123805	0.135398	0.147439	0.15979
	10.4361	0.000494641	0.00050349	0.000510488	0.000515635	0.000518932	0.000520378	0.000519973	0.000517717	0.000513611	0.000507654	0.000499847	0.000478101	0.000361074	0.000164234	-7.49968e-05	-0.000319197	-0.000530945	-0.000672817	-0.000707393	-0.000597249	-0.000304964	0.000206884	0.000758434	0.0010964	0.0013477	0.00164392	0.00211665	0.00289748	0.00411801	0.00590982	0.0084045	0.0117336	0.016016	0.021139	0.0269932	0.0335161	0.0406452	0.0483181	0.0564722	0.0650452	0.0739745	0.0831976	0.092652	0.102466	0.113007	0.124161	0.135793	0.147766
	10.4456	0.000494641	0.000505389	0.000513889	0.000520141	0.000524145	0.000525901	0.000525409	0.000522669	0.000517682	0.000510447	0.000500964	0.000479074	0.000376412	0.000205977	-7.77999e-07	-0.000212402	-0.000397443	-0.000524449	-0.000561969	-0.000478551	-0.000242743	0.000176907	0.000611316	0.000827585	0.000946466	0.00109305	0.00139242	0.00196968	0.0029499	0.00445818	0.00661961	0.00955928	0.013387	0.0179563	0.0231652	0.0289726	0.0353375	0.0422188	0.0495754	0.0573663	0.0655503	0.0740864	0.0829336	0.0922187	0.102263	0.112951	0.124148	0.135718
	10.455	0.000494641	0.000504413	0.00051214	0.000517824	0.000521464	0.000523061	0.000522614	0.000520123	0.000515589	0.000509011	0.000500389	0.000481417	0.00039619	0.000255338	8.458e-05	-9.03645e-05	-0.000243777	-0.000349939	-0.000383131	-0.000317634	-0.00012773	0.0002123	0.000545448	0.000660311	0.000670373	0.000693087	0.000845909	0.00124629	0.00201168	0.00325954	0.00510732	0.00767247	0.0110549	0.0150756	0.0196411	0.0247319	0.0303289	0.0364126	0.0429636	0.0499628	0.0573906	0.0652279	0.0734552	0.0821972	0.0917277	0.10193	0.112669	0.123812
	10.4645	0.000494641	0.000501672	0.000507231	0.000511321	0.00051394	0.000515089	0.000514767	0.000512975	0.000509713	0.00050498	0.000498777	0.000484539	0.000418094	0.00030784	0.000174099	3.71954e-05	-8.25503e-05	-0.000164815	-0.000189277	-0.000135614	1.64961e-05	0.000287376	0.000532772	0.000563068	0.000483817	0.00040416	0.000433238	0.000680193	0.00125417	0.0022643	0.00381973	0.00602961	0.00898344	0.0124723	0.0164116	0.020803	0.0256484	0.0309495	0.0367083	0.0429265	0.0496058	0.0567482	0.0643554	0.072549	0.081555	0.0912559	0.10152	0.112214
	10.474	0.000494641	0.000498277	0.000501152	0.000503267	0.000504621	0.000505215	0.000505049	0.000504122	0.000502435	0.000499988	0.00049678	0.00048785	0.00043981	0.000359007	0.000260803	0.000160558	7.36341e-05	1.53911e-05	1.19001e-06	4.63916e-05	0.000166357	0.000376446	0.000545228	0.000504347	0.000351198	0.000186392	0.000110541	0.000224259	0.000628158	0.00142285	0.00270895	0.00458706	0.00713642	0.0101218	0.0134674	0.0171947	0.021325	0.0258799	0.0308807	0.036349	0.0423062	0.0487737	0.0557729	0.0634216	0.0718997	0.08109	0.0908631	0.10109
	10.4834	0.000494641	0.00049534	0.000495892	0.000496298	0.000496558	0.000496672	0.000496641	0.000496463	0.000496138	0.000495668	0.000495052	0.000490759	0.000459022	0.000404362	0.000337712	0.000270004	0.000212173	0.000175151	0.000169871	0.000207268	0.000298273	0.000453821	0.000554759	0.000452636	0.00023691	-9.40431e-08	-0.000166052	-0.000168639	8.44709e-05	0.000685601	0.00172708	0.00330122	0.00547757	0.0079994	0.0107993	0.0139158	0.0173878	0.0212537	0.0255523	0.0303222	0.0356021	0.0414306	0.0478464	0.0549626	0.0629163	0.0715918	0.0808636	0.0906061
	10.4929	0.000494641	0.000493971	0.00049344	0.00049305	0.0004928	0.000492691	0.000492721	0.000492892	0.000493204	0.000493655	0.000494247	0.000492673	0.000473417	0.00043943	0.00039785	0.000355814	0.000320463	0.000298934	0.000298367	0.000325898	0.000388668	0.000493814	0.000533307	0.000376424	0.000105352	-0.000195172	-0.000440412	-0.000545629	-0.000426086	2.95401e-06	0.000826229	0.00212848	0.00397067	0.00608045	0.00839786	0.0109754	0.0138657	0.0171211	0.0207943	0.0249377	0.0296039	0.0348453	0.0407146	0.0473195	0.0547593	0.0629214	0.0716851	0.0809296
	10.5024	0.000494641	0.000495144	0.000495541	0.000495833	0.00049602	0.000496102	0.000496079	0.000495951	0.000495718	0.00049538	0.000494937	0.000493072	0.000480923	0.000460176	0.000434907	0.000409194	0.000387112	0.00037274	0.000370153	0.000383429	0.000416645	0.000473878	0.00045654	0.000248736	-7.35836e-05	-0.000432183	-0.000748823	-0.000945269	-0.000943282	-0.000664626	-3.10623e-05	0.00103565	0.00258951	0.00434954	0.00626195	0.00838892	0.0107926	0.0135353	0.0166791	0.0202862	0.0244188	0.0291392	0.0345094	0.0406311	0.047573	0.0552266	0.0634772	0.0722102
	10.5118	0.000494641	0.000496689	0.000498308	0.000499499	0.000500262	0.000500597	0.000500503	0.000499981	0.000499031	0.000497653	0.000495846	0.000493022	0.000485214	0.000473177	0.000458735	0.000443713	0.000429935	0.000419226	0.000413411	0.000414313	0.000423757	0.000443568	0.000384359	0.000143664	-0.00020893	-0.00060179	-0.000963285	-0.00122178	-0.00130565	-0.00114326	-0.000662981	0.000206824	0.00151369	0.00297551	0.00454438	0.00628872	0.00827701	0.0105777	0.0132592	0.01639	0.0200386	0.0242733	0.0291628	0.0348006	0.0412278	0.0483426	0.0560387	0.0642096
	10.5213	0.000494641	0.000497578	0.0004999	0.000501609	0.000502703	0.000503182	0.000503048	0.000502299	0.000500937	0.00049896	0.000496369	0.000493068	0.000488409	0.000482516	0.000475687	0.000468219	0.000460409	0.000452556	0.000444956	0.000437908	0.000431709	0.000426656	0.000342897	9.07504e-05	-0.000267098	-0.00066616	-0.00104195	-0.00132998	-0.00146576	-0.00138481	-0.00102263	-0.000314745	0.00077989	0.00198467	0.00325763	0.00467092	0.00629666	0.00820699	0.010474	0.01317	0.0163669	0.0201369	0.0245522	0.0296967	0.0355854	0.0421256	0.0492212	0.0567763
	10.5308	0.000494641	0.000497924	0.00050052	0.000502429	0.000503652	0.000504189	0.000504038	0.000503202	0.000501678	0.000499469	0.000496572	0.00049319	0.000490674	0.000488767	0.000486846	0.000484291	0.000480479	0.000474789	0.0004666	0.000455288	0.000440233	0.000420813	0.000326861	8.08108e-05	-0.000261915	-0.000644324	-0.00100942	-0.00130022	-0.00145973	-0.00143094	-0.00115688	-0.000580552	0.000332674	0.00131708	0.00233671	0.00346516	0.00477607	0.00634304	0.00823969	0.0105396	0.0133165	0.0166439	0.0205954	0.0252437	0.0305799	0.0365217	0.0429851	0.0498862
	10.5402	0.000494641	0.00049784	0.00050037	0.000502231	0.000503422	0.000503945	0.000503799	0.000502983	0.000501499	0.000499346	0.000496523	0.000493371	0.000492175	0.000492501	0.000493296	0.000493511	0.000492092	0.000487989	0.000480151	0.000467525	0.000449061	0.000423708	0.000330962	0.000104659	-0.000207211	-0.000555313	-0.000890314	-0.00116288	-0.00132367	-0.00132336	-0.00111261	-0.000642087	0.00011659	0.000912824	0.00171657	0.00260111	0.00363972	0.00490565	0.0064722	0.00841262	0.0108002	0.0137082	0.0172099	0.0213659	0.0261451	0.0314769	0.0372904	0.043515
	10.5497	0.000494641	0.00049744	0.000499653	0.000501281	0.000502324	0.000502781	0.000502653	0.00050194	0.000500641	0.000498757	0.000496288	0.000493591	0.000493079	0.000494292	0.000496122	0.000497458	0.000497193	0.000494216	0.000487419	0.000475691	0.000457925	0.00043301	0.000349907	0.000153109	-0.000116814	-0.000418159	-0.000709226	-0.000948313	-0.00109372	-0.00110374	-0.000936682	-0.000550837	7.61874e-05	0.000711978	0.00133223	0.00200842	0.00281206	0.00381463	0.00508761	0.00670251	0.0087308	0.011244	0.0143135	0.0179876	0.0222149	0.0269372	0.0320975	0.0376387
	10.5592	0.000494641	0.000496837	0.000498573	0.00049985	0.000500668	0.000501027	0.000500927	0.000500367	0.000499348	0.00049787	0.000495933	0.000493832	0.000493551	0.000494713	0.000496406	0.000497715	0.000497728	0.000495532	0.000490213	0.000480859	0.000466556	0.000446391	0.000378406	0.000216974	-4.55226e-06	-0.000251893	-0.000490767	-0.000686892	-0.000805989	-0.000813775	-0.00067597	-0.000358293	0.000156018	0.000654618	0.00111865	0.00161676	0.00221758	0.00298978	0.004002	0.00532287	0.00702105	0.00916518	0.0118239	0.0150329	0.0187231	0.0228487	0.0273665	0.032233
	10.5686	0.000494641	0.000496144	0.000497332	0.000498206	0.000498766	0.000499012	0.000498943	0.00049856	0.000497863	0.000496851	0.000495525	0.000494073	0.000493757	0.000494337	0.000495232	0.000495861	0.000495644	0.000493998	0.000490344	0.0004841	0.000474685	0.000461519	0.000411167	0.00028707	0.000115745	-7.55461e-05	-0.000259542	-0.000408981	-0.000496602	-0.000495144	-0.000377345	-0.000115943	0.000300633	0.000680821	0.00101082	0.00135576	0.00178076	0.00235093	0.0031314	0.00418729	0.00558371	0.0073858	0.00965868	0.0124261	0.0156037	0.0191576	0.0230576	0.0272736
	10.5781	0.000494641	0.000495475	0.000496134	0.000496619	0.000496929	0.000497065	0.000497027	0.000496815	0.000496428	0.000495867	0.000495132	0.000494297	0.000493863	0.000493736	0.000493685	0.000493478	0.000492886	0.000491677	0.000489621	0.000486488	0.000482046	0.000476064	0.0004429	0.00035421	0.00023025	9.18502e-05	-4.01583e-05	-0.000144946	-0.000201682	-0.000189536	-8.76781e-05	0.000124722	0.000454582	0.000730664	0.00094374	0.0011551	0.00142605	0.00181788	0.00239188	0.00320935	0.00433158	0.00581988	0.00773553	0.0100915	0.0127905	0.0158097	0.0191311	0.0227366
	10.5876	0.000494641	0.000494942	0.00049518	0.000495356	0.000495468	0.000495517	0.000495503	0.000495426	0.000495287	0.000495084	0.000494819	0.000494484	0.000494036	0.000493484	0.000492847	0.000492146	0.0004914	0.000490629	0.000489854	0.000489093	0.000488368	0.000487697	0.000468313	0.000409208	0.000325133	0.000231265	0.000142778	7.48487e-05	4.26522e-05	6.1364e-05	0.000146159	0.000312214	0.000562416	0.000744224	0.00085238	0.000944434	0.00107794	0.00131044	0.00169948	0.00230263	0.00317742	0.00438141	0.00597215	0.00795331	0.0102174	0.0127513	0.0155473	0.0185975
	10.597	0.000494641	0.00049466	0.000494675	0.000494686	0.000494693	0.000494696	0.000494696	0.000494691	0.000494682	0.000494669	0.000494653	0.000494615	0.000494441	0.000494153	0.000493803	0.000493446	0.000493132	0.000492917	0.000492852	0.00049299	0.000493384	0.000494088	0.000482116	0.000442878	0.000386566	0.000323665	0.00026466	0.000220036	0.000200278	0.000215869	0.000277296	0.000395044	0.000568687	0.000661577	0.000671731	0.000653414	0.000660889	0.000748422	0.000970276	0.00138072	0.00203401	0.00298441	0.0042862	0.00593574	0.00781828	0.00992832	0.0122662	0.0148324
	10.6065	0.000494641	0.000494641	0.000494641	0.000494641	0.000494641	0.000494641	0.000494641	0.000494641	0.000494641	0.000494641	0.000494641	0.000494685	0.000495068	0.000495733	0.000496544	0.000497367	0.000498066	0.000498505	0.000498548	0.000498061	0.000496906	0.000494949	0.000483744	0.000454038	0.000412527	0.000366093	0.000321619	0.000285988	0.000266084	0.000268788	0.000300984	0.000369555	0.000471606	0.000483621	0.000406084	0.000290304	0.000187591	0.000149254	0.000226603	0.000470947	0.000933595	0.00166586	0.00271904	0.00408447	0.00564373	0.00739668	0.00934936	0.0115078
	10.616	0.000494641	0.000494641	0.000494641	0.000494641	0.000494641	0.000494641	0.000494641	0.000494641	0.000494641	0.000494641	0.000494641	0.000494728	0.000495486	0.000496805	0.000498414	0.000500046	0.000501431	0.000502301	0.000502387	0.00050142	0.000499131	0.000495252	0.000484696	0.000462156	0.000431734	0.000397644	0.0003641	0.000335315	0.000315503	0.000308878	0.000319653	0.000352041	0.000401595	0.000358137	0.000223786	4.59908e-05	-0.000127801	-0.00025014	-0.00027358	-0.000150672	0.000166032	0.000723981	0.00157062	0.00269387	0.00397654	0.00542243	0.00704154	0.00884389
	10.6254	0.000494641	0.000494641	0.000494641	0.000494641	0.000494641	0.000494641	0.000494641	0.000494641	0.000494641	0.000494641	0.000494641	0.00049475	0.000495701	0.000497354	0.000499372	0.000501418	0.000503155	0.000504246	0.000504354	0.000503141	0.000500271	0.000495407	0.000485814	0.000468908	0.00044697	0.000422336	0.000397342	0.000374325	0.000355623	0.00034357	0.000340504	0.000348761	0.000363124	0.000286959	0.000123318	-8.50003e-05	-0.000295195	-0.000464468	-0.000550018	-0.000509046	-0.000298753	0.000123662	0.000800997	0.00171913	0.00276627	0.00394894	0.00527968	0.00677102
	10.6349	0.000494641	0.000494641	0.000494641	0.000494641	0.000494641	0.000494641	0.000494641	0.000494641	0.000494641	0.000494641	0.000494641	0.000494755	0.000495749	0.000497478	0.000499588	0.000501728	0.000503545	0.000504686	0.000504798	0.00050353	0.000500529	0.000495442	0.000487047	0.000474471	0.000458813	0.00044119	0.000422722	0.000404529	0.000387729	0.000373442	0.000362787	0.000356883	0.000350381	0.00026017	8.96544e-05	-0.000123578	-0.000341942	-0.000527851	-0.000643718	-0.000651958	-0.000514983	-0.000195207	0.000344956	0.00109048	0.00193824	0.00289648	0.00397908	0.00519989
	10.6444	0.000494641	0.000494641	0.000494641	0.000494641	0.000494641	0.000494641	0.000494641	0.000494641	0.000494641	0.000494641	0.000494641	0.000494747	0.00049567	0.000497274	0.000499234	0.00050122	0.000502906	0.000503965	0.00050407	0.000502893	0.000500107	0.000495384	0.000488345	0.000479022	0.00046784	0.000455228	0.000441617	0.000427434	0.000413109	0.000399072	0.000385751	0.000373576	0.000357556	0.000267851	0.000107772	-9.0653e-05	-0.000295392	-0.000474414	-0.00059569	-0.000627188	-0.00053688	-0.000292733	0.000137282	0.000738139	0.00141775	0.00218531	0.00305503	0.00404114
	10.6538	0.000494641	0.000494641	0.000494641	0.000494641	0.000494641	0.000494641	0.000494641	0.000494641	0.000494641	0.000494641	0.000494641	0.00049473	0.000495501	0.000496841	0.000498478	0.000500137	0.000501546	0.000502431	0.000502518	0.000501535	0.000499207	0.000495262	0.000489659	0.000482736	0.000474629	0.000465474	0.000455403	0.000444551	0.000433052	0.000421039	0.000408647	0.000396009	0.000378839	0.000300086	0.000162644	-7.13348e-06	-0.000182893	-0.000338279	-0.00044694	-0.00048252	-0.000418666	-0.000229024	0.00011276	0.000592327	0.00113014	0.00173567	0.00242281	0.00320543
	10.6633	0.000494641	0.000494641	0.000494641	0.000494641	0.000494641	0.000494641	0.000494641	0.000494641	0.000494641	0.000494641	0.000494641	0.000494707	0.00049528	0.000496276	0.000497492	0.000498724	0.000499771	0.000500428	0.000500493	0.000499763	0.000498033	0.000495102	0.000490938	0.000485789	0.000479759	0.000472948	0.000465458	0.000457389	0.000448843	0.000439921	0.000430723	0.00042135	0.000408419	0.000346957	0.000239247	0.000106071	-3.17949e-05	-0.00015357	-0.000238476	-0.000265733	-0.000214563	-6.41861e-05	0.000206176	0.000583264	0.00100071	0.00146785	0.00199773	0.0026034
	10.6728	0.000494641	0.000494641	0.000494641	0.000494641	0.000494641	0.000494641	0.000494641	0.000494641	0.000494641	0.000494641	0.000494641	0.000494683	0.000495045	0.000495676	0.000496445	0.000497225	0.000497887	0.000498303	0.000498344	0.000497882	0.000496788	0.000494933	0.000492133	0.000488358	0.000483806	0.000478673	0.000473158	0.000467458	0.000461771	0.000456295	0.000451228	0.000446768	0.000440486	0.000398545	0.000322557	0.00022805	0.000130552	4.55905e-05	-1.1306e-05	-2.46098e-05	2.1207e-05	0.000141672	0.000352314	0.000641173	0.000954775	0.00130208	0.00169507	0.00214572
	10.6822	0.000494641	0.000494641	0.000494641	0.000494641	0.000494641	0.000494641	0.000494641	0.000494641	0.000494641	0.000494641	0.000494641	0.000494661	0.000494836	0.000495139	0.000495508	0.000495883	0.000496202	0.000496402	0.000496421	0.000496199	0.000495673	0.000494782	0.000493192	0.000490619	0.000487348	0.000483671	0.00047988	0.000476266	0.000473123	0.000470741	0.000469413	0.000469431	0.000469229	0.000444933	0.000397547	0.000337895	0.000276798	0.000225079	0.000193562	0.000193068	0.000234422	0.000328444	0.000485959	0.000696273	0.00091766	0.00115864	0.00143012	0.00174303
	10.6917	0.000494641	0.000494641	0.000494641	0.000494641	0.000494641	0.000494641	0.000494641	0.000494641	0.000494641	0.000494641	0.000494641	0.000494646	0.000494689	0.000494762	0.000494852	0.000494943	0.00049502	0.000495069	0.000495074	0.00049502	0.000494892	0.000494676	0.000494067	0.000492748	0.000490964	0.000488964	0.000487001	0.000485324	0.000484186	0.000483836	0.000484527	0.000486507	0.000488837	0.000476203	0.000449194	0.000414695	0.000379593	0.000350773	0.00033512	0.00033952	0.000370859	0.000436023	0.000541896	0.000678785	0.000814676	0.000957781	0.00111818	0.00130597
	10.7012	0.000494641	0.000494641	0.000494641	0.000494641	0.000494641	0.000494641	0.000494641	0.000494641	0.000494641	0.000494641	0.000494641	0.000494641	0.000494641	0.000494641	0.000494641	0.000494641	0.000494641	0.000494641	0.000494641	0.000494641	0.000494641	0.000494641	0.000494708	0.000494913	0.000495207	0.000495536	0.000495845	0.000496082	0.000496193	0.000496126	0.000495825	0.000495238	0.000493665	0.000482724	0.000462903	0.00043814	0.000412368	0.000389523	0.000373542	0.000368359	0.00037791	0.00040613	0.000456956	0.000521194	0.000573651	0.000622541	0.000677596	0.000748549
	10.7107	0.000494641	0.000494641	0.000494641	0.000494641	0.000494641	0.000494641	0.000494641	0.000494641	0.000494641	0.000494641	0.000494641	0.000494641	0.000494641	0.000494641	0.000494641	0.000494641	0.000494641	0.000494641	0.000494641	0.000494641	0.000494641	0.000494641	0.000495127	0.000496643	0.000498805	0.000501221	0.000503497	0.000505242	0.000506061	0.000505561	0.00050335	0.000499034	0.000491979	0.000478908	0.00046034	0.000438136	0.000414161	0.000390276	0.000368345	0.000350229	0.000337793	0.000332899	0.00033741	0.000342574	0.000328152	0.000302275	0.000274335	0.000253721
	10.7201	0.000494641	0.000494641	0.000494641	0.000494641	0.000494641	0.000494641	0.000494641	0.000494641	0.000494641	0.000494641	0.000494641	0.000494641	0.000494641	0.000494641	0.000494641	0.000494641	0.000494641	0.000494641	0.000494641	0.000494641	0.000494641	0.000494641	0.000495375	0.000497663	0.000500927	0.000504575	0.000508012	0.000510646	0.000511882	0.000511128	0.00050779	0.000501273	0.000491017	0.000477187	0.000460293	0.000440778	0.000419082	0.000395644	0.000370906	0.000345309	0.000319292	0.000293297	0.000267764	0.000234635	0.000177808	0.000104982	2.4889e-05	-5.37421e-05
	10.7296	0.000494641	0.000494641	0.000494641	0.000494641	0.000494641	0.000494641	0.000494641	0.000494641	0.000494641	0.000494641	0.000494641	0.000494641	0.000494641	0.000494641	0.000494641	0.000494641	0.000494641	0.000494641	0.000494641	0.000494641	0.000494641	0.000494641	0.00049548	0.000498094	0.000501824	0.000505992	0.00050992	0.000512929	0.000514342	0.00051348	0.000509665	0.000502219	0.000490657	0.000477188	0.000462292	0.000445533	0.000426477	0.000404689	0.000379734	0.000351178	0.000318586	0.000281523	0.000239554	0.000185511	0.000106713	1.01469e-05	-9.63667e-05	-0.000205006
	10.7391	0.000494641	0.000494641	0.000494641	0.000494641	0.000494641	0.000494641	0.000494641	0.000494641	0.000494641	0.000494641	0.000494641	0.000494641	0.000494641	0.000494641	0.000494641	0.000494641	0.000494641	0.000494641	0.000494641	0.000494641	0.000494641	0.000494641	0.000495471	0.000498055	0.000501744	0.000505866	0.00050975	0.000512726	0.000514123	0.000513271	0.000509499	0.000502135	0.000490774	0.000478541	0.000465862	0.000451868	0.000435693	0.000416471	0.000393335	0.000365419	0.000331855	0.000291777	0.000244319	0.000183341	9.89639e-05	-2.74609e-06	-0.000115057	-0.000231238
	10.7485	0.000494641	0.000494641	0.000494641	0.000494641	0.000494641	0.000494641	0.000494641	0.000494641	0.000494641	0.000494641	0.000494641	0.000494641	0.000494641	0.000494641	0.000494641	0.000494641	0.000494641	0.000494641	0.000494641	0.000494641	0.000494641	0.000494641	0.000495376	0.000497668	0.000500937	0.000504591	0.000508034	0.000510672	0.00051191	0.000511155	0.000507811	0.000501284	0.000491245	0.000480876	0.000470531	0.000459251	0.000446077	0.000430052	0.000410216	0.000385612	0.000355279	0.000318261	0.000273597	0.000216261	0.000138655	4.57884e-05	-5.68081e-05	-0.000163605
	10.758	0.000494641	0.000494641	0.000494641	0.000494641	0.000494641	0.000494641	0.000494641	0.000494641	0.000494641	0.000494641	0.000494641	0.000494641	0.000494641	0.000494641	0.000494641	0.000494641	0.000494641	0.000494641	0.000494641	0.000494641	0.000494641	0.000494641	0.000495226	0.00049705	0.000499653	0.000502561	0.000505301	0.000507401	0.000508387	0.000507785	0.000505124	0.000499929	0.000491946	0.00048382	0.000475826	0.00046715	0.000456977	0.000444493	0.000428885	0.000409338	0.000385039	0.000355173	0.000318926	0.000272407	0.00020988	0.000135235	5.27559e-05	-3.32739e-05
	10.7675	0.000494641	0.000494641	0.000494641	0.000494641	0.000494641	0.000494641	0.000494641	0.000494641	0.000494641	0.000494641	0.000494641	0.000494641	0.000494641	0.000494641	0.000494641	0.000494641	0.000494641	0.000494641	0.000494641	0.000494641	0.000494641	0.000494641	0.00049505	0.000496323	0.00049814	0.00050017	0.000502083	0.000503548	0.000504236	0.000503817	0.000501959	0.000498332	0.000492755	0.000487004	0.000481275	0.000475032	0.000467737	0.000458855	0.000447848	0.00043418	0.000417314	0.000396714	0.000371843	0.000339915	0.000296736	0.000245079	0.00018801	0.000128589
	10.7769	0.000494641	0.000494641	0.000494641	0.000494641	0.000494641	0.000494641	0.000494641	0.000494641	0.000494641	0.000494641	0.000494641	0.000494641	0.000494641	0.000494641	0.000494641	0.000494641	0.000494641	0.000494641	0.000494641	0.000494641	0.000494641	0.000494641	0.000494876	0.000495606	0.000496647	0.000497811	0.000498908	0.000499748	0.000500143	0.000499902	0.000498837	0.000496758	0.000493547	0.000490055	0.000486405	0.000482365	0.000477706	0.000472199	0.000465613	0.000457718	0.000448286	0.000437085	0.000423886	0.000406923	0.000383316	0.000354806	0.000323328	0.000290818
	10.7864	0.000494641	0.000494641	0.000494641	0.000494641	0.000494641	0.000494641	0.000494641	0.000494641	0.000494641	0.000494641	0.000494641	0.000494641	0.000494641	0.000494641	0.000494641	0.000494641	0.000494641	0.000494641	0.000494641	0.000494641	0.000494641	0.000494641	0.000494733	0.000495018	0.000495425	0.00049588	0.000496308	0.000496636	0.00049679	0.000496696	0.00049628	0.000495468	0.000494198	0.000492604	0.000490742	0.000488617	0.00048623	0.000483586	0.000480686	0.000477534	0.000474132	0.000470485	0.000466593	0.000461567	0.000453716	0.0004439	0.000433086	0.000422244
	10.7959	0.000494641	0.000494641	0.000494641	0.000494641	0.000494641	0.000494641	0.000494641	0.000494641	0.000494641	0.000494641	0.000494641	0.000494641	0.000494641	0.000494641	0.000494641	0.000494641	0.000494641	0.000494641	0.000494641	0.000494641	0.000494641	0.000494641	0.000494651	0.00049468	0.000494722	0.000494769	0.000494813	0.000494847	0.000494862	0.000494853	0.00049481	0.000494726	0.000494586	0.000494278	0.000493816	0.000493256	0.000492657	0.000492077	0.000491575	0.000491208	0.000491035	0.000491114	0.000491502	0.000491984	0.000492032	0.000491846	0.000491659	0.000491703
	10.8053	0.000494641	0.000494641	0.000494641	0.000494641	0.000494641	0.000494641	0.000494641	0.000494641	0.000494641	0.000494641	0.000494641	0.000494641	0.000494641	0.000494641	0.000494641	0.000494641	0.000494641	0.000494641	0.000494641	0.000494641	0.000494641	0.000494641	0.000494641	0.000494641	0.000494641	0.000494641	0.000494641	0.000494641	0.000494641	0.000494641	0.000494641	0.000494641	0.000494659	0.000494926	0.000495428	0.00049606	0.000496715	0.000497284	0.000497662	0.000497741	0.000497415	0.000496575	0.000495116	0.000493269	0.000491687	0.000490164	0.000488454	0.00048631
	10.8148	0.000494641	0.000494641	0.000494641	0.000494641	0.000494641	0.000494641	0.000494641	0.000494641	0.000494641	0.000494641	0.000494641	0.000494641	0.000494641	0.000494641	0.000494641	0.000494641	0.000494641	0.000494641	0.000494641	0.000494641	0.000494641	0.000494641	0.000494641	0.000494641	0.000494641	0.000494641	0.000494641	0.000494641	0.000494641	0.000494641	0.000494641	0.000494641	0.000494686	0.000495352	0.000496609	0.000498189	0.000499825	0.000501249	0.000502194	0.000502391	0.000501574	0.000499476	0.000495827	0.00049121	0.000487256	0.000483449	0.000479172	0.000473813
	10.8243	0.000494641	0.000494641	0.000494641	0.000494641	0.000494641	0.000494641	0.000494641	0.000494641	0.000494641	0.000494641	0.000494641	0.000494641	0.000494641	0.000494641	0.000494641	0.000494641	0.000494641	0.000494641	0.000494641	0.000494641	0.000494641	0.000494641	0.000494641	0.000494641	0.000494641	0.000494641	0.000494641	0.000494641	0.000494641	0.000494641	0.000494641	0.000494641	0.000494707	0.000495677	0.00049751	0.000499813	0.000502198	0.000504274	0.000505651	0.000505939	0.000504748	0.000501689	0.00049637	0.00048964	0.000483876	0.000478325	0.000472091	0.000464278
	10.8337	0.000494641	0.000494641	0.000494641	0.000494641	0.000494641	0.000494641	0.000494641	0.000494641	0.000494641	0.000494641	0.000494641	0.000494641	0.000494641	0.000494641	0.000494641	0.000494641	0.000494641	0.000494641	0.000494641	0.000494641	0.000494641	0.000494641	0.000494641	0.000494641	0.000494641	0.000494641	0.000494641	0.000494641	0.000494641	0.000494641	0.000494641	0.000494641	0.000494721	0.000495902	0.00049813	0.000500932	0.000503833	0.000506359	0.000508034	0.000508384	0.000506936	0.000503214	0.000496744	0.000488557	0.000481545	0.000474793	0.000467209	0.000457706
	10.8432	0.000494641	0.000494641	0.000494641	0.000494641	0.000494641	0.000494641	0.000494641	0.000494641	0.000494641	0.000494641	0.000494641	0.000494641	0.000494641	0.000494641	0.000494641	0.000494641	0.000494641	0.000494641	0.000494641	0.000494641	0.000494641	0.000494641	0.000494641	0.000494641	0.000494641	0.000494641	0.000494641	0.000494641	0.000494641	0.000494641	0.000494641	0.000494641	0.000494728	0.000496025	0.000498471	0.000501547	0.000504732	0.000507504	0.000509343	0.000509728	0.000508138	0.000504052	0.000496949	0.000487962	0.000480265	0.000472853	0.000464528	0.000454096
	10.8527	0.000494641	0.000494641	0.000494641	0.000494641	0.000494641	0.000494641	0.000494641	0.000494641	0.000494641	0.000494641	0.000494641	0.000494641	0.000494641	0.000494641	0.000494641	0.000494641	0.000494641	0.000494641	0.000494641	0.000494641	0.000494641	0.000494641	0.000494641	0.000494641	0.000494641	0.000494641	0.000494641	0.000494641	0.000494641	0.000494641	0.000494641	0.000494641	0.00049473	0.000496047	0.000498533	0.000501658	0.000504893	0.000507709	0.000509578	0.000509969	0.000508353	0.000504202	0.000496986	0.000487856	0.000480036	0.000472504	0.000464047	0.000453448
	10.8621	0.000494641	0.000494641	0.000494641	0.000494641	0.000494641	0.000494641	0.000494641	0.000494641	0.000494641	0.000494641	0.000494641	0.000494641	0.000494641	0.000494641	0.000494641	0.000494641	0.000494641	0.000494641	0.000494641	0.000494641	0.000494641	0.000494641	0.000494641	0.000494641	0.000494641	0.000494641	0.000494641	0.000494641	0.000494641	0.000494641	0.000494641	0.000494641	0.000494725	0.000495968	0.000498314	0.000501263	0.000504317	0.000506975	0.000508739	0.000509108	0.000507583	0.000503665	0.000496855	0.000488237	0.000480856	0.000473748	0.000465766	0.000455762
	10.8716	0.000494641	0.000494641	0.000494641	0.000494641	0.000494641	0.000494641	0.000494641	0.000494641	0.000494641	0.000494641	0.000494641	0.000494641	0.000494641	0.000494641	0.000494641	0.000494641	0.000494641	0.000494641	0.000494641	0.000494641	0.000494641	0.000494641	0.000494641	0.000494641	0.000494641	0.000494641	0.000494641	0.000494641	0.000494641	0.000494641	0.000494641	0.000494641	0.000494713	0.000495788	0.000497816	0.000500365	0.000503004	0.000505301	0.000506825	0.000507144	0.000505827	0.000502441	0.000496554	0.000489106	0.000482727	0.000476584	0.000469685	0.000461038
	10.8811	0.000494641	0.000494641	0.000494641	0.000494641	0.000494641	0.000494641	0.000494641	0.000494641	0.000494641	0.000494641	0.000494641	0.000494641	0.000494641	0.000494641	0.000494641	0.000494641	0.000494641	0.000494641	0.000494641	0.000494641	0.000494641	0.000494641	0.000494641	0.000494641	0.000494641	0.000494641	0.000494641	0.000494641	0.000494641	0.000494641	0.000494641	0.000494641	0.000494696	0.000495507	0.000497037	0.000498962	0.000500954	0.000502688	0.000503838	0.000504079	0.000503084	0.000500528	0.000496085	0.000490463	0.000485648	0.000481011	0.000475803	0.000469277
	10.8905	0.000494641	0.000494641	0.000494641	0.000494641	0.000494641	0.000494641	0.000494641	0.000494641	0.000494641	0.000494641	0.000494641	0.000494641	0.000494641	0.000494641	0.000494641	0.000494641	0.000494641	0.000494641	0.000494641	0.000494641	0.000494641	0.000494641	0.000494641	0.000494641	0.000494641	0.000494641	0.000494641	0.000494641	0.000494641	0.000494641	0.000494641	0.000494641	0.000494672	0.000495125	0.000495979	0.000497054	0.000498166	0.000499135	0.000499777	0.000499911	0.000499356	0.000497929	0.000495448	0.000492308	0.00048962	0.00048703	0.000484122	0.000480478
	10.9	0.000494641	0.000494641	0.000494641	0.000494641	0.000494641	0.000494641	0.000494641	0.000494641	0.000494641	0.000494641	0.000494641	0.000494641	0.000494641	0.000494641	0.000494641	0.000494641	0.000494641	0.000494641	0.000494641	0.000494641	0.000494641	0.000494641	0.000494641	0.000494641	0.000494641	0.000494641	0.000494641	0.000494641	0.000494641	0.000494641	0.000494641	0.000494641	0.000494641	0.000494641	0.000494641	0.000494641	0.000494641	0.000494641	0.000494641	0.000494641	0.000494641	0.000494641	0.000494641	0.000494641	0.000494641	0.000494641	0.000494641	0.000494641
[truncated: 123 more columns]

## Sheet: Fig4-S1C
		Before	MIRS
		4.51231	5.079
		4.62364	4.06638
		4.18218	4.57522
		4.40938	4.93703
		4.03727	5.05095
		4.7122	4.54221

## Sheet: Fig4-S1D
		Before	MIRS
		3.52196	3.45542
		4.96262	5.10531
		4.13207	3.6703
		3.97553	4.40777
		4.57805	4.04957
