# Supplementary material for: Sensory input-dependent gain modulation of the optokinetic nystagmus by mid-infrared stimulation in pigeons
Source: eLife. 2023 Feb 28;12:e78729. doi: 10.7554/eLife.78729 (PMC9977280; doi:10.7554/eLife.78729)
Supplement: Figure 4—source data 1. [file elife-78729-fig4-data1.xlsx]

## Sheet: Fig4B
		prefer 8 deg/s	prefer 2 deg/s	0	null 2 deg/s	null 8 deg/s
		0.0911356	0.113069	-0.122284	-0.131469	-0.207202
		0.309796	0.0860818	0.133845	-0.00709379	-0.105932
		0.123121	0.0911	-0.0786784	0.0542129	-0.120855
		0.144958	0.166397	-0.147406	0.0344376	-0.118297
		0.0904049	0.0322934	-0.0547824	-0.0772385	-0.0312657
		0.205315	0.13474	0.0202461	-0.136963	-0.239835
		0.125657	0.142692		-0.198098	-0.124562
		0.425151	-0.118694		-0.246201	-0.206383
		0.236472	-0.0712562		-0.129972	-0.165197
		0.20108	0.0235147		-0.0814895	-0.254031
		0.133578	-0.0726903		-0.0987109	-0.322887
		0.0642548	-0.0763011			-0.0168046
		0.112033	0.231831			-0.122744
		0.257651				-0.0642028
		0.331831				-0.387697
		0.0863682				0.103504
		0.0601796				-0.107373
		0.156682				-0.58
		0.292743				-0.101297
		0.0957803				-0.144269
		0.10278				-0.253883
		0.275861				-0.113259
		0.117011				-0.223338
		0.245161				-0.2994
		0.0812161
		0.105588
		0.218094
		0.0775547
		0.151693
		-0.00358645
		0.0198058
		-0.00349191
		0.2245

## Sheet: Fig4C
		Preferred					Null
		Before	MIRS	After			Before	MIRS	After
		34.6567	38.5629	30.6724			25.554	22.8167	27.8911
		23.821	24.3041	24.1973			24.2763	22.5534	21.1035
		29.8477	32.8924	29.8576			25.6763	24.9101	22.885
		31.2121	34.2392	27.1659			25.0132	19.0131	23.8934
		22.5451	27.476	24.2234			27.1224	16.5602	20.831
		26.8248	30.8925	26.438			36.2807	32.6105	39.1576
		28.315	31.6364	31.1103			29.7629	22.9594	30.9467

## Sheet: Fig4E
	T-N							N-T
		2.5mW	5mW	10m	20mW				2.5mW	5mW	10m	20mW
		-0.128012	0.211342	0.268387	-0.287003				0.424779	-0.406025	0.222774	0.414791
		0.584166	-0.413803	0.127691	0.474369				-0.291965	-1.06102	-0.385938	-0.474361
		0.507234	0.193529	0.405664	0.312325				-0.588431	-0.188041	-0.763987	-0.278291
		0.397992	0.647758	0.36567	0.458959				0.206833	0.12786	0.134936	-0.30116
		-0.150144	0.179964	0.603246	-0.0675133				-0.449635	0.111623	-0.651626	-0.0187685
		0.172123	0.155395	0.211919	0.229449				-0.146346	-1.32467	-0.433175	-0.379886
		0.689404	0.427024	0.603778	0.640873				0.237682	-0.559044	0.272673	0.519918
		0.0857022	-1.1792	1.39508	1.1909				-0.0606913	-0.301646	-0.0700216	-0.432409
		0.1529	-0.92346	-1.00886	-0.750356				0.0437676	0.59221	-1.70179	-0.334356
		-0.405256	-0.682103	1.88616	1.16781				0.106188	1.18012	1.26937	-0.91602
		0.613892	0.898824	0.0779939	1.23818				-0.411313	-0.341843	-0.959118	0.187435
		0.00489127	0.241687	0.0896654	0.25564				0.490441	1.11304	-0.322786	-0.00604694
		-0.55806	-0.0850297	0.396129	0.118847				0.456197	-0.424851	-0.937957	-0.834459
		-0.408	0.716349	-0.123887	0.101109				0.094845	0.390404	-0.942853	0.402093
		0.637323	0.257948	0.469081	0.461609				0.00358876	0.383483	0.280319	-0.941824
		-0.100436	0.104534	0.24356	0.887191				0.158309	-0.0169963	-0.0738926	-0.602767
		0.366849	0.0166139	0.963365	1.0131				-0.914634	-0.721982	0.0429273	-0.939645
		-0.204581	-0.0691309	0.0862981	0.0531542
		0.017715	0.230217	0.340961	0.234555
		-0.159881	0.335552	0.434096	0.376746
		-0.227206	0.017827	0.144735	0.181208

## Sheet: Fig4F
	Preferred							Null
		2.5mW	5mW	10m	20mW				2.5mW	5mW	10m	20mW
		0.0341594	0.130064	0.0911356	0.161513				0.0862709	-0.0707536	-0.207202	-0.21617
		0.218941	0.226069	0.309796	0.322297				-0.0666688	-0.0969563	-0.105932	-0.299126
		-0.0560463	0.0199187	0.123121	0.113517				-0.119382	-0.0443111	-0.120855	-0.134822
		0.0429655	0.0627676	0.144958	0.153435				-0.174039	-0.0578144	-0.118297	-0.128113
		0.0648808	0.102763	0.0904049	0.0759449				-0.233605	-0.113206	-0.0312657	-0.106678
		0.0195638	-0.0510912	0.205315	0.311373				-0.167038	-0.0544161	-0.239835	-0.416309
		0.0668395	0.037873	0.125657	0.30657				-0.0687279	-0.0411802	-0.124562	-0.126478
		0.2011	0.134983	0.425151	0.179525				-0.0654598	0.015509	-0.206383	-0.127205
		-0.0828642	0.23688	0.236472	0.290911				-0.147173	-0.144652	-0.165197	-0.227447
		0.263232	0.142433	0.20108	0.356808
		0.205984	-0.00544471	0.133578	0.140252
		0.0544532	-0.0510574	0.0642548	0.0973425

## Sheet: Fig4H
		30s	120s
		0.0679761	0.919932
		0.268387	0.386185
		0.585862	0.704839
		0.445162	0.176519
		0.316364	0.704082
			0.345667
			0.0929988
			0.0905219
			0.244508
			0.676576
			0.36567
			0.603778
			0.0768568
			0.989224
			0.469081
			0.13393
			0.0010753
			0.340961
			0.0522031
			0.230217

## Sheet: Fig4I
	TN
			1st phase	2nd phase	3rd phase	4th phase
			2.14068	-0.112189	1.13797	-0.258572
			0.19902	0.322993	0.625097	0.355355
			1.51546	0.476695	-0.0444204	0.0817488
			-0.342679	-0.472843	-0.306708	1.28171
			0.718369	0.177988	1.23367	0.398702
			0.161664	0.300437	0.451962	0.454332
			-0.134659	0.651529	0.3684	0.440155
			-0.306499	0.570515	-0.0665591	0.141511
			-0.213634	0.227032	0.660776	0.364783
			1.00628	1.31813	0.194509	-0.440693
			0.00610105	0.331034	-0.0224733	1.22544
			0.398809	0.466248	0.575819	0.922563
			0.185587	-0.0895753	0.508234	-0.272656
			0.825924	0.528487	1.05473	1.46611
			0.718092	1.33492	0.196647	-0.325839
			-0.203178	0.34698	0.0158136	0.281985
			0.1319	-0.0145867	0.0826882	-0.340728
			0.503664	0.034153	0.773713	0.0937299
			0.0280901	0.238662	-0.0240703	-0.035477
			0.484704	0.0514931	-0.215784	0.433778

## Sheet: Fig4J
	Preferred
			Before	1st phase	2nd phase	3rd phase	4th phase	MIRS	After
			0	0.500699	0.0625702	0.24218	0.321321	0.309796	0.0164282
			0	0.12501	-0.0344385	0.0155056	0.149026	0.0737412	0.0161686
			-2.9976e-15	0.317886	0.0915472	-0.138275	0.167236	0.123121	-0.173019
			0	0.11917	0.031425	0.10844	0.159958	0.112709	-0.11497
			0	0.232753	0.134515	0.290173	0.401324	0.258716	0.118779
			0	0.384415	-0.03731	-0.02502	0.159355	0.140035	0.078947
			0	0.236131	0.278173	0.354531	0.315568	0.29433	0.028241
			0	0.082132	0.084834	0.130281	0.165852	0.115501	0.156557
			0	0.247691	0.2898	0.271129	0.188496	0.247146	0.138144
			0	0.022477	0.481214	-0.23983	0.029111	0.081749	-0.15061
			0	0.424113	-0.06954	-0.09424	0.134889	0.106662	0.013612
			0	-0.01398	0.01581	0.11104	5.01e-05	0.027228	0.017489
			0	0.083519	-0.00263	-0.18524	0.001975	-0.0088	-0.03083
			0	0.076426	0.076982	0.155731	0.690801	0.23797	0.494882
			0	-0.07131	0.166401	0.098424	-0.01015	0.064521	-0.02537
			0	-0.1328	-0.02754	0.14089	-0.10325	-0.02806	0.076006
			0	0.181582	0.076743	-0.00317	0.161816	0.098657	-0.12872
			0	0.214543	0.170989	0.014825	0.019466	0.104077	0.010139
			0	0.389712	0.223348	0.207181	0.243247	0.271321	0.186075
			0	0.409893	0.216543	0.129626	0.135093	0.21634	0.074253
			0	0.041978	0.103066	0.058997	0.150729	0.095486	0.020038
			0	0.424908	-0.03947	0.181644	-0.04896	0.157048	-0.01279
			0	0.27389	0.304722	0.288009	0.310835	0.293853	-0.00457
			0	0.141489	0.070585	-0.0032	0.269812	0.116784	0.095119
			0	0.041727	0.30755	-0.00692	0.182883	0.144958	0.06523
			0	0.076638	0.083431	0.095311	0.102539	0.090405	0.054301
			0	-0.01399	0.274319	0.17763	0.140944	0.131277	0.335003
			0	0.195434	0.033186	-0.01678	0.17257	0.125657	-0.06306
			0	0.406126	0.281104	0.326237	0.636047	0.425151	0.002843
			0	0.108963	-0.1302	0.303239	0.041738	0.101485	0.083062
			0	0.131925	0.171035	0.513901	-0.06158	0.199707	0.156377
			0	0.00591	0.148794	0.161118	0.227608	0.133578	0.016448
			0	-0.05998	0.014529	0.200353	0.12764	0.077112	-0.00733
	Null		Before	1st phase	2nd phase	3rd phase	4th phase	MIRS	After
			-5.9952e-15	-0.120916	-0.204944	-0.116882	-0.10149	-0.105932	0.0461643
			-2.69784e-14	0.0320381	-0.128755	-0.182424	0.0780672	-0.0713326	-0.0844276
			9.99201e-15	-0.155093	-0.565461	-0.365326	-0.0799204	-0.120855	-0.108958
			0	-0.37589	-0.3339	-0.23043	-0.37677	-0.32196	-0.21932
			0	-0.08488	-0.10938	0.266214	-0.24787	-0.03844	0.509777
			0	-0.00344	-0.05319	0.202833	0.146502	0.102247	0.026425
			0	-0.08395	-0.14818	-0.02019	-0.14707	-0.1017	0.086494
			0	-0.80803	-0.55984	-0.84593	-0.76909	-0.74981	-0.56345
			0	-0.23966	-0.25495	-0.14018	-0.2085	-0.20262	-0.00932
			0	-0.2611	-0.07496	-0.04387	-0.14319	-0.12059	-0.03092
			0	0.140154	-0.06457	-0.35097	-0.18006	-0.06455	-0.08609
			0	-0.35549	-0.42125	-0.36627	-0.40526	-0.38508	-0.23074
			0	-0.14923	-0.10035	-0.0725	-0.07442	-0.1002	0.078411
			0	0.046635	0.038922	-0.17969	-0.14558	-0.07704	0.120774
			0	-0.13937	-0.19418	-0.32832	-0.34597	-0.2567	0.212544
			0	-0.11958	-0.16016	-0.03838	-0.11081	-0.11386	-0.03438
			0	-0.13943	-0.37437	-0.29713	-0.06064	-0.22657	0.039265
			0	0.037174	-0.2642	-0.18694	-0.02732	-0.1183	-0.19643
			0	-0.2781	0.11396	0.157336	-0.13589	-0.03127	-0.10898
			0	-0.42474	-0.1876	-0.13758	-0.21163	-0.23984	-0.13939
			0	-0.1049	-0.13936	-0.14341	-0.12099	-0.12456	0.007623
			0	-0.24839	-0.1354	-0.23033	-0.22458	-0.20638	0.017847
			0	-0.10177	-0.542	-0.45594	0.144699	-0.25418	-0.0499
			0	0.00174855	-0.16956	-0.168447	-0.292791	-0.165197	0.00147997
