# Supplementary material for: Sensory input-dependent gain modulation of the optokinetic nystagmus by mid-infrared stimulation in pigeons
Source: eLife. 2023 Feb 28;12:e78729. doi: 10.7554/eLife.78729 (PMC9977280; doi:10.7554/eLife.78729)
Supplement: Figure 5—figure supplement 2—source data 1. [file elife-78729-fig5-figsupp2-data1.xlsx]

## Sheet: Sheet1
		Na+ channel			K+ channel
		0.000245932			0.00012246
		0.000292486			0.000139665
		0.000355234			0.000162942
		0.000439236			0.000197352
		0.000559671			0.000235811
		0.000739819			0.000285402
		0.00111327			0.000356246
		0.00166991			0.000449356
		0.00280342			0.000588009
		0.00617359			0.000806615
		0.02601			0.00118411
		0.0288438			0.00193304
		0.0682232			0.00373452
		0.0154542			0.00889604
		0.0160311			0.0136325
		0.0242288			0.0108797
		0.00821796			0.0162639
		0.0146749			0.00965509
		0.0110011			0.00400777
		0.0158287			0.00208485
		0.00576876			0.00128532
		0.00497935			0.000888592
		0.00599142			0.000663914
		0.00896689			0.000527285
		0.01846			0.00044126
		0.0761274			0.000384584
		0.0899623			0.000349162
		0.0408064			0.000329933
		0.0335094			0.000321836
		0.10232			0.000326897
		0.0932111			0.00034309
		0.151911			0.000374464
		0.240436			0.000426079
		0.146425			0.000507044
		0.0857319			0.0006376
		0.0959032			0.000864303
		0.0977451			0.00131568
		0.0731621			0.00243907
		0.0839406			0.00433163
		0.192373			0.00624443
		0.042112			0.00751963
		0.0176403			0.00860254
		0.0122966			0.0138754
		0.0117298			0.0106469
		0.014847			0.0103129
		0.0272346			0.0124383
		0.0980386			0.00653793
		0.169824			0.00296535
		0.100508			0.00165978
		0.108807			0.00109303
		0.375992			0.000793458
		0.0882621			0.000619383
		0.0270828			0.000516153
		0.0133592			0.000444296
		0.00812687			0.000385596
		0.00559671			0.000351186
		0.0041191			0.000327909
		0.00369403			0.000303619
		0.00325885			0.000296535
		0.00288438			0.000295523
		0.0027933			0.000299571
		0.00287426			0.000308679
		0.00326897			0.00032386
		0.00490851			0.000346126
		0.0104243			0.000376488
		0.00781313			0.000415958
		0.00516153			0.000468586
		0.00550563			0.000538418
		0.00700348			0.000633552
		0.00997895			0.000767144
		0.0163347			0.000959436
		0.0343494			0.00125496
		0.134179			0.00174075
		0.216926			0.00261112
		0.0701664			0.00445308
		0.105912			0.00918954
		0.508451			0.0229536
		0.298883			0.0311513
		0.162831			0.0162133
		0.044713			0.00712493
		0.0220124			0.00412922
		0.0142094			0.00308679
		0.0108088			0.0028945
		0.00937171			0.00337017
		0.0092199			0.00498947
		0.0104344			0.00981702
		0.0141993			0.0232066
		0.0266274			0.0212736
		0.089345			0.010657
		0.139179			0.0100802
		0.141709			0.0153732
		0.1837			0.021476
		0.270737			0.0193709
		0.196431			0.0103129
		0.140211			0.00485791
		0.0391163			0.00282366
		0.02517			0.0019128
		0.0422435			0.00143713
		0.164997			0.00115375
		0.0346733			0.00098069
		0.0122966			0.00086329
		0.00670998			0.000784349
		0.00442272			0.000732734
		0.00320824			0.000699336
		0.00247956			0.000682131
		0.00198365			0.000677071
		0.00163954			0.000682131
		0.00137641			0.000698324
		0.00116387			0.00072565
		0.000932111			0.000775241
		0.000761072			0.000864303
		0.000602178			0.000928062
		0.000463525			0.00100802
		0.000259088			0.00111327
		0.000154846			0.00140677
		0.000137641			0.00162942
		0.00012246			0.00184196
		0.000110315			0.00213545
		0			0.00247956
		0			0.00320824
		0			0.00385596
		0			0.00468586
		0			0.00590033
		0			0.00772205
		0			0.0106874
		0			0.0160513
		0			0.027184
		0			0.0553903
		0			0.139624
		0			0.219051
		0			0.100073
		0.000212533			0.042537
		0.00063254			0.022984
		0.00121448			0.0148369
		0.00155858			0.0108392
		0.00240871			0.00869363
		0.00278318			0.00750951
		0.0034815			0.00689215
		0.00396729			0.00665938
		0.00471622			0.00670998
		0.00547526			0.0070136
		0.00645697			0.00758036
		0.00772205			0.00847097
		0.00942231			0.00981702
		0.0117703			0.0119019
		0.0151911			0.0154542
		0.0206765			0.0221743
		0.0118614			0.0343899
		0.0191078			0.0559469
		0.037497			0.0771091
		0.126862			0.100296
		0.178356			0.0828172
		0.259493			0.116509
		0.268662			0.242258
		0.263552			0.365001
		0.212179			0.301666
		0.143642			0.29362
		0.170047			0.371023
		0.082635			0.52772
		0.0642762			0.305805
		0.0222755			0.204154
		0.0356854			0.124545
		0.0302202			0.0744778
		0.0321027			0.042284
		0.0451886			0.0281253
		0.104506			0.0208182
		0.375668			0.0166687
		0.343079			0.0144219
		0.553356			0.014007
		0.130273			0.0167193
		0.144118			0.021142
		0.248907			0.0261112
		0.0537305			0.0394604
		0.0236317			0.0232471
		0.0140474			0.0151101
		0.00912882			0.0160311
		0.00665938			0.0262226
		0.00484779			0.0367379
		0.00385596			0.0364444
		0.00367379			0.0357461
		0.0032386			0.0198567
		0.00293499			0.00986762
		0.00273257			0.00616347
		0.00261112			0.00444296
		0.00256052			0.00349162
		0.00258076			0.00288438
		0.00247956			0.00245932
		0.00267185			0.00214558
		0.00250992			0.00189256
		0.00298559			0.00170027
		0.00363331			0.00149785
		0.00439236			0.00136629
		0.00581937			0.00126508
		0.00839001			0.00115375
		0.0126306			0.000910857
		0.020302			0.000782325
		0.0385293			0.000721602
		0.10235			0.00060319
		0.455216			0.000288438
		0.725903			0.000266173
		0.1342			0.000198365
		0.0473443			0.000177111
		0.0248057			0.000146749
		0.0161525			0.000135617
		0.0125293			0.000125496
		0.0108291			0.000117399
		0.0104647			0.000109303
		0.011244			0.000102218
		0.0134604			9.61461e-05
		0.0181969			9.03773e-05
		0.0288135			8.03579e-05
		0.0589527			7.57024e-05
		0.207544			5.20201e-05
		0.529653			4.90851e-05
		0.397701			4.63525e-05
		0.0918246			4.39236e-05
		0.052263			4.15958e-05
		0.0669986			2.73257e-05
		0.252267			1.73063e-05
		0.233301			6.82131e-06
		0.0590236			0
		0.0390555			0
		0.0601368			0
		0.2643			0
		0.18795			0
		0.043458			0
		0.0190369			0
		0.0110619			0
		0.00742855			0
		0.00542466			0
		0.00417982			0
		0.00334993			0
		0.00276293			0
		0.00203425			0
		0.00143713			0
		0.0012246			0
		0.00105255			0
		0.000917942			1.28532e-05
		0.000806615			0.000185208
		0.000444296			0.000293499
		0.000391669			0.000308679
		0.000349162			0.000325885
		0.000312728			0.000498947
		0.000281354			0.000745891
		0			0.000788398
		0			0.000834953
		0			0.000884544
		0			0.000940207
		0			0.00104243
		0			0.00118411
		0			0.00126508
					0.00135617
					0.00145737
					0.00158894
					0.00180147
					0.00211521
					0.00237835
					0.00276293
					0.00299571
					0.00326897
					0.00357259
					0.00392681
					0.00433163
					0.00481742
					0.00540442
					0.00610274
					0.00695288
					0.00802567
					0.00939195
					0.0111732
					0.013592
					0.0170229
					0.0221642
					0.030534
					0.0459578
					0.0800441
					0.167426
					0.311635
					0.322858
					0.292578
					0.249079
					0.420442
					0.535058
					0.274168
					0.130941
					0.088758
					0.0893956
					0.139179
					0.196725
					0.140181
					0.0937879
					0.106439
					0.181696
					0.365628
					0.502581
					0.590003
					0.633198
					0.30705
					0.285108
					0.146456
					0.0440045
					0.0304125
					0.0224779
					0.0174075
					0.0139564
					0.0114869
					0.00965509
					0.00824832
					0.00714517
					0.00625455
					0.00553599
					0.00493887
					0.00443284
					0.00400777
					0.00364343
					0.00332969
					0.00305643
					0.00280342
					0.00242895
					0.0021557
					0.00200389
					0.0018622
					0.00158894
					0.00128532
					0.00120436
					0.00112339
					0.00105255
					0.00099081
					0.000894664
					0.000771193
					0.000727674
					0.000687191
					0.000650757
					0.000595094
					0.000477694
					0.00028439
					0.000182171
					0
					0
					0
					0
					0
					0
					0
					0
					0
					0
					0
					0
					0
					0
					0
					0
					0
					0
					0
					0
					1.41689e-05
					1.49785e-05
					1.57882e-05
					1.65978e-05
					2.14558e-05
					2.26702e-05
					2.39859e-05
					3.66367e-05
					0.000197352
					0.000208485
					0.000372439
					0.000392681
					0.000667962
					0.000750951
					0.00079447
					0.000842037
					0.000893652
					0.000950328
					0.00102218
					0.00109303
					0.00116387
					0.00125496
					0.00134604
					0.00145737
					0.00157882
					0.00172051
					0.00188244
					0.00206461
					0.00237835
					0.00270221
					0.00300583
					0.00357259
					0.00400777
					0.0048073
					0.00585985
					0.00683143
					0.00819772
					0.0106064
					0.0149381
					0.0258886
					0.0344203
					0.0256862
					0.0266375
					0.0357562
					0.0503198
					0.0798316
					0.163914
					0.305937
					0.24495
					0.287649
					0.443071
					0.526202
					0.369596
					0.20639
					0.113493
					0.0787993
					0.0657437
					0.0642256
					0.0647114
					0.058305
					0.0578799
					0.0610983
					0.0674642
					0.0078941
					0.00996883
					0.0116893
					0.0157781
					0.0271436
					0.0367784
					0.0421423
					0.0546919
					0.0547122
					0.0679095
					0.0938892
					0.0788296
					0.0541859
					0.0633248
					0.0499757
					0.0434884
					0.0462311
					0.0480629
					0.0592766
					0.0829993
					0.13421
					0.268612
					0.3448
					0.295351
					0.408297
					0.696674
					1
					0.887681
					0.352431
					0.24835
					0.141436
					0.091106
					0.0636183
					0.0470002
					0.0361712
					0.0287224
					0.0233787
					0.0194114
					0.0163853
					0.0140171
					0.0121346
					0.0106064
					0.00935147
					0.00830904
					0.00743867
					0.00667962
					0.00604202
					0.00548539
					0.00498947
					0.00457453
					0.00418994
					0.00383572
					0.00355234
					0.00328921
					0.00304631
					0.0028439
					0.00265161
					0.00248968
					0.00233787
					0.00219618
					0.00207473
					0.00195328
					0.00185208
					0.00152822
					0.00144725
					0.00104243
					0.000986762
					0
					0
					0
					0
					0
					0
					0
					0
					0
					0
					0
					0
					0
					0
