# Supplementary material for: Sensory input-dependent gain modulation of the optokinetic nystagmus by mid-infrared stimulation in pigeons
Source: eLife. 2023 Feb 28;12:e78729. doi: 10.7554/eLife.78729 (PMC9977280; doi:10.7554/eLife.78729)
Supplement: Figure 5—source data 1. [file elife-78729-fig5-data1.xlsx]

## Sheet: Fig5A
	K+ Channel			Na+ Channel			water
	x	y		x	y		x	y
	0.45	0.0330505		0.3	0.0400661		0.4	0.0164922
	0.548	0.0329967		0.298	0.0399464		0.409398	0.0164264
	0.546	0.0329417		0.296	0.0398236		0.418796	0.0163649
	0.544	0.0328856		0.294	0.0396977		0.428194	0.0163084
	0.542	0.0328282		0.292	0.0395688		0.437592	0.0162576
	0.54	0.0327697		0.29	0.0394368		0.44699	0.016213
	0.538	0.0327101		0.288	0.0393018		0.456388	0.016175
	0.536	0.0326493		0.286	0.0391637		0.465786	0.0161442
	0.534	0.0325873		0.284	0.0390227		0.475184	0.0161208
	0.532	0.0325242		0.282	0.0388787		0.484582	0.0161049
	0.53	0.0324599		0.28	0.0387318		0.493981	0.0160966
	0.528	0.0323946		0.278	0.0385819		0.503379	0.0160958
	0.526	0.032328		0.276	0.0384291		0.512777	0.0161024
	0.524	0.0322604		0.274	0.0382734		0.522175	0.016116
	0.522	0.0321917		0.272	0.0381149		0.531573	0.0161364
	0.52	0.0321218		0.27	0.0379536		0.540971	0.0161631
	0.518	0.0320509		0.268	0.0377894		0.550369	0.0161955
	0.516	0.0319789		0.266	0.0376225		0.559767	0.0162331
	0.514	0.0319058		0.264	0.0374529		0.569165	0.0162752
	0.512	0.0318316		0.262	0.0372805		0.578563	0.0163211
	0.51	0.0317564		0.26	0.0371055		0.587961	0.0163702
	0.508	0.0316802		0.258	0.0369279		0.597359	0.0164218
	0.506	0.0316029		0.256	0.0367476		0.606757	0.0164751
	0.504	0.0315245		0.254	0.0365648		0.616155	0.0165296
	0.502	0.0314452		0.252	0.0363795		0.625553	0.0165845
	0.5	0.0313648		0.25	0.0361917		0.634951	0.0166393
	0.498	0.0312835		0.248	0.0360015		0.644349	0.0166933
	0.496	0.0312012		0.246	0.0358088		0.653748	0.0167462
	0.494	0.0311179		0.244	0.0356138		0.663146	0.0167975
	0.492	0.0310337		0.242	0.0354165		0.672544	0.0168468
	0.49	0.0309485		0.24	0.035217		0.681942	0.0168939
	0.488	0.0308624		0.238	0.0350152		0.69134	0.0169386
	0.486	0.0307754		0.236	0.0348112		0.700738	0.0169807
	0.484	0.0306875		0.234	0.0346051		0.710136	0.0170202
	0.482	0.0305987		0.232	0.0343969		0.719534	0.0170571
	0.48	0.030509		0.23	0.0341867		0.728932	0.0170914
	0.478	0.0304185		0.228	0.0339746		0.73833	0.0171233
	0.476	0.0303271		0.226	0.0337604		0.747728	0.017153
	0.474	0.0302349		0.224	0.0335445		0.757126	0.0171807
	0.472	0.0301419		0.222	0.0333267		0.766524	0.0172066
	0.47	0.030048		0.22	0.0331071		0.775922	0.0172311
	0.468	0.0299534		0.218	0.0328858		0.78532	0.0172545
	0.466	0.0298581		0.216	0.0326629		0.794718	0.017277
	0.464	0.029762		0.214	0.0324383		0.804116	0.0172991
	0.462	0.0296651		0.212	0.0322122		0.813514	0.0173211
	0.46	0.0295676		0.21	0.0319847		0.822912	0.0173432
	0.458	0.0294693		0.208	0.0317557		0.83231	0.0173658
	0.456	0.0293704		0.206	0.0315253		0.841709	0.0173891
	0.454	0.0292708		0.204	0.0312936		0.851107	0.0174135
	0.452	0.0291705		0.202	0.0310606		0.860505	0.0174392
	0.45	0.0290697		0.2	0.0308265		0.869903	0.0174663
	0.448	0.0289682		0.198	0.0305912		0.879301	0.0174951
	0.446	0.0288661		0.196	0.0303549		0.888699	0.0175256
	0.444	0.0287635		0.194	0.0301175		0.898097	0.017558
	0.442	0.0286603		0.192	0.0298792		0.907495	0.0175923
	0.44	0.0285565		0.19	0.02964		0.916893	0.0176285
	0.438	0.0284523		0.188	0.0294		0.926291	0.0176667
	0.436	0.0283475		0.186	0.0291593		0.935689	0.0177067
	0.434	0.0282423		0.184	0.0289178		0.945087	0.0177486
	0.432	0.0281366		0.182	0.0286757		0.954485	0.0177921
	0.43	0.0280305		0.18	0.028433		0.963883	0.0178372
	0.428	0.027924		0.178	0.0281898		0.973281	0.0178838
	0.426	0.027817		0.176	0.0279462		0.982679	0.0179315
	0.424	0.0277097		0.174	0.0277022		0.992077	0.0179804
	0.422	0.027602		0.172	0.0274579		1.00148	0.01803
	0.42	0.027494		0.17	0.0272133		1.01087	0.0180803
	0.418	0.0273857		0.168	0.0269686		1.02027	0.0181311
	0.416	0.027277		0.166	0.0267237		1.02967	0.018182
	0.414	0.0271681		0.164	0.0264788		1.03907	0.0182329
	0.412	0.0270589		0.162	0.0262338		1.04847	0.0182836
	0.41	0.0269495		0.16	0.025989		1.05786	0.0183339
	0.408	0.0268399		0.158	0.0257442		1.06726	0.0183835
	0.406	0.0267301		0.156	0.0254997		1.07666	0.0184324
	0.404	0.0266201		0.154	0.0252555		1.08606	0.0184804
	0.402	0.02651		0.152	0.0250115		1.09546	0.0185272
	0.4	0.0263997		0.15	0.024768		1.10485	0.0185729
	0.398	0.0262893		0.148	0.0245249		1.11425	0.0186173
	0.396	0.0261788		0.146	0.0242823		1.12365	0.0186604
	0.394	0.0260683		0.144	0.0240403		1.13305	0.0187021
	0.392	0.0259577		0.142	0.0237989		1.14245	0.0187424
	0.39	0.0258471		0.14	0.0235582		1.15184	0.0187813
	0.388	0.0257365		0.138	0.0233183		1.16124	0.0188189
	0.386	0.0256259		0.136	0.0230792		1.17064	0.0188552
	0.384	0.0255153		0.134	0.022841		1.18004	0.0188903
	0.382	0.0254048		0.132	0.0226038		1.18944	0.0189243
	0.38	0.0252944		0.13	0.0223675		1.19883	0.0189573
	0.378	0.025184		0.128	0.0221323		1.20823	0.0189894
	0.376	0.0250738		0.126	0.0218982		1.21763	0.0190207
	0.374	0.0249638		0.124	0.0216653		1.22703	0.0190514
	0.372	0.0248539		0.122	0.0214336		1.23643	0.0190816
	0.37	0.0247442		0.12	0.0212032		1.24582	0.0191114
	0.368	0.0246347		0.118	0.0209741		1.25522	0.0191409
	0.366	0.0245254		0.116	0.0207464		1.26462	0.0191702
	0.364	0.0244164		0.114	0.0205202		1.27402	0.0191995
	0.362	0.0243077		0.112	0.0202955		1.28342	0.0192287
	0.36	0.0241992		0.11	0.0200723		1.29282	0.0192578
	0.358	0.0240911		0.108	0.0198508		1.30221	0.019287
	0.356	0.0239833		0.106	0.0196309		1.31161	0.0193162
	0.354	0.0238759		0.104	0.0194127		1.32101	0.0193453
	0.352	0.0237688		0.102	0.0191963		1.33041	0.0193742
	0.35	0.0236622		0.0999996	0.0189816		1.33981	0.019403
	0.348	0.0235559		0.0979996	0.0187689		1.3492	0.0194314
	0.346	0.0234501		0.0959996	0.018558		1.3586	0.0194593
	0.344	0.0233448		0.0939996	0.0183491		1.368	0.0194865
	0.342	0.0232399		0.0919996	0.0181421		1.3774	0.019513
	0.34	0.0231356		0.0899996	0.0179372		1.3868	0.0195385
	0.338	0.0230317		0.0879996	0.0177343		1.39619	0.0195628
	0.336	0.0229284		0.0859996	0.0175336		1.40559	0.0195858
	0.334	0.0228257		0.0839996	0.017335		1.41499	0.0196072
	0.332	0.0227235		0.0819996	0.0171386		1.42439	0.019627
	0.33	0.022622		0.0799996	0.0169445		1.43379	0.019645
	0.328	0.0225211		0.0779996	0.0167526		1.44318	0.0196612
	0.326	0.0224208		0.0759995	0.016563		1.45258	0.0196753
	0.324	0.0223211		0.0739995	0.0163758		1.46198	0.0196874
	0.322	0.0222222		0.0719995	0.0161909		1.47138	0.0196974
	0.32	0.0221239		0.0699995	0.0160084		1.48078	0.0197055
	0.318	0.0220264		0.0679995	0.0158284		1.49017	0.0197116
	0.316	0.0219296		0.0659995	0.0156509		1.49957	0.0197159
	0.314	0.0218336		0.0639995	0.0154758		1.50897	0.0197185
	0.312	0.0217383		0.0619995	0.0153032		1.51837	0.0197196
	0.31	0.0216438		0.0599995	0.0151332		1.52777	0.0197194
	0.308	0.0215502		0.0579995	0.0149658		1.53716	0.0197182
	0.306	0.0214573		0.0559995	0.014801		1.54656	0.0197163
	0.303999	0.0213653		0.0539995	0.0146388		1.55596	0.0197138
	0.301999	0.0212742		0.0519995	0.0144793		1.56536	0.0197112
	0.299999	0.021184		0.0499995	0.0143224		1.57476	0.0197087
	0.297999	0.0210946		0.0479995	0.0141682		1.58415	0.0197067
	0.296	0.0210062		0.0459995	0.0140167		1.59355	0.0197054
	0.294	0.0209187		0.0439995	0.0138679		1.60295	0.0197051
	0.292	0.0208321		0.0419995	0.0137218		1.61235	0.019706
	0.289999	0.0207466		0.0399995	0.0135785		1.62175	0.0197085
	0.287999	0.020662		0.0379995	0.013438		1.63115	0.0197126
	0.285999	0.0205784		0.0359995	0.0133002		1.64054	0.0197185
	0.283999	0.0204958		0.0339995	0.0131653		1.64994	0.0197264
	0.281999	0.0204142		0.0319995	0.0130331		1.65934	0.0197362
	0.279999	0.0203337		0.0299995	0.0129037		1.66874	0.019748
	0.277999	0.0202543		0.0279995	0.0127771		1.67814	0.0197618
	0.275999	0.0201759		0.0259995	0.0126534		1.68753	0.0197774
	0.273999	0.0200986		0.0239994	0.0125325		1.69693	0.0197947
	0.271999	0.0200225		0.0219994	0.0124144		1.70633	0.0198136
	0.269999	0.0199474		0.0199994	0.0122991		1.71573	0.0198339
	0.267999	0.0198735		0.0179994	0.0121867		1.72513	0.0198553
	0.265999	0.0198008		0.0159994	0.012077		1.73452	0.0198776
	0.263999	0.0197292		0.0139994	0.0119702		1.74392	0.0199005
	0.261999	0.0196587		0.0119994	0.0118663		1.75332	0.0199237
	0.259999	0.0195895		0.00999942	0.0117651		1.76272	0.0199471
	0.257999	0.0195215		0.00799942	0.0116668		1.77212	0.0199702
	0.255999	0.0194547		0.00599941	0.0115713		1.78151	0.019993
	0.253999	0.0193891		0.00399941	0.0114786		1.79091	0.020015
	0.251999	0.0193247		0.0019994	0.0113887		1.80031	0.0200363
	0.249999	0.0192616		6e-07	0.0113015		1.80971	0.0200566
	0.247999	0.0191998		0.0020006	0.0112172		1.81911	0.0200759
	0.245999	0.0191393		0.00400061	0.0111356		1.8285	0.020094
	0.243999	0.01908		0.00600061	0.0110567		1.8379	0.0201109
	0.241999	0.019022		0.00800062	0.0109806		1.8473	0.0201268
	0.239999	0.0189654		0.0100006	0.0109073		1.8567	0.0201417
	0.237999	0.01891		0.0120006	0.0108366		1.8661	0.0201557
	0.235999	0.018856		0.0140006	0.0107686		1.87549	0.0201689
	0.233999	0.0188033		0.0160006	0.0107033		1.88489	0.0201817
	0.231999	0.018752		0.0180006	0.0106407		1.89429	0.0201942
	0.229999	0.018702		0.0200006	0.0105806		1.90369	0.0202067
	0.227999	0.0186534		0.0220006	0.0105232		1.91309	0.0202195
	0.225999	0.0186062		0.0240006	0.0104684		1.92248	0.0202328
	0.223999	0.0185603		0.0260007	0.0104162		1.93188	0.020247
	0.221999	0.0185159		0.0280007	0.0103665		1.94128	0.0202623
	0.219999	0.0184728		0.0300007	0.0103194		1.95068	0.020279
	0.217999	0.0184312		0.0320007	0.0102747		1.96008	0.0202973
	0.215999	0.0183909		0.0340007	0.0102325		1.96948	0.0203174
	0.213999	0.0183521		0.0360007	0.0101928		1.97887	0.0203395
	0.211999	0.0183147		0.0380007	0.0101555		1.98827	0.0203636
	0.209999	0.0182787		0.0400007	0.0101205		1.99767	0.0203898
	0.207999	0.0182442		0.0420007	0.010088		2.00707	0.0204182
	0.205999	0.0182112		0.0440007	0.0100578		2.01647	0.0204485
	0.203999	0.0181795		0.0460007	0.0100298		2.02586	0.0204808
	0.201999	0.0181494		0.0480007	0.0100042		2.03526	0.0205149
	0.199999	0.0181207		0.0500007	0.00998077		2.04466	0.0205505
	0.197999	0.0180934		0.0520007	0.00995957		2.05406	0.0205874
	0.195999	0.0180676		0.0540007	0.00994054		2.06346	0.0206253
	0.193999	0.0180433		0.0560007	0.00992366		2.07285	0.0206638
	0.191999	0.0180205		0.0580007	0.00990888		2.08225	0.0207025
	0.189999	0.0179992		0.0600007	0.00989619		2.09165	0.0207412
	0.187999	0.0179793		0.0620007	0.00988553		2.10105	0.0207793
	0.185999	0.0179609		0.0640007	0.00987687		2.11045	0.0208165
	0.183999	0.017944		0.0660007	0.00987019		2.11984	0.0208524
	0.181999	0.0179286		0.0680007	0.00986543		2.12924	0.0208867
	0.179999	0.0179147		0.0700007	0.00986258		2.13864	0.020919
	0.177999	0.0179023		0.0720007	0.00986158		2.14804	0.0209491
	0.175999	0.0178913		0.0740008	0.0098624		2.15744	0.0209766
	0.173999	0.0178819		0.0760008	0.009865		2.16683	0.0210015
	0.171999	0.017874		0.0780008	0.00986935		2.17623	0.0210235
	0.169999	0.0178675		0.0800008	0.00987541		2.18563	0.0210427
	0.167999	0.0178625		0.0820008	0.00988313		2.19503	0.021059
	0.165999	0.0178591		0.0840008	0.00989249		2.20443	0.0210724
	0.163999	0.0178571		0.0860008	0.00990343		2.21382	0.0210831
	0.161999	0.0178566		0.0880008	0.00991592		2.22322	0.0210912
	0.159999	0.0178576		0.0900008	0.00992993		2.23262	0.021097
	0.157999	0.0178601		0.0920008	0.0099454		2.24202	0.0211008
	0.155999	0.0178641		0.0940008	0.00996231		2.25142	0.0211028
	0.153999	0.0178695		0.0960008	0.00998061		2.26082	0.0211035
	0.151999	0.0178764		0.0980008	0.0100003		2.27021	0.0211032
	0.149999	0.0178849		0.100001	0.0100212		2.27961	0.0211023
	0.147999	0.0178947		0.102001	0.0100435		2.28901	0.0211012
	0.145999	0.0179061		0.104001	0.0100669		2.29841	0.0211003
	0.143999	0.0179189		0.106001	0.0100916		2.30781	0.0210999
	0.141999	0.0179331		0.108001	0.0101174		2.3172	0.0211005
	0.139999	0.0179488		0.110001	0.0101443		2.3266	0.0211024
	0.137999	0.017966		0.112001	0.0101723		2.336	0.0211058
	0.135999	0.0179846		0.114001	0.0102013		2.3454	0.021111
	0.133999	0.0180046		0.116001	0.0102314		2.3548	0.0211181
	0.131999	0.0180261		0.118001	0.0102623		2.36419	0.0211274
	0.129999	0.018049		0.120001	0.0102942		2.37359	0.021139
	0.127999	0.0180733		0.122001	0.010327		2.38299	0.0211528
	0.125999	0.018099		0.124001	0.0103606		2.39239	0.0211688
	0.123999	0.0181261		0.126001	0.010395		2.40179	0.0211869
	0.121999	0.0181547		0.128001	0.0104302		2.41118	0.0212071
	0.119999	0.0181846		0.130001	0.010466		2.42058	0.0212291
	0.117999	0.0182158		0.132001	0.0105026		2.42998	0.0212528
	0.115999	0.0182485		0.134001	0.0105398		2.43938	0.0212778
	0.113999	0.0182825		0.136001	0.0105777		2.44878	0.0213041
	0.111999	0.0183178		0.138001	0.0106161		2.45817	0.0213312
	0.109999	0.0183545		0.140001	0.010655		2.46757	0.0213588
	0.107999	0.0183925		0.142001	0.0106944		2.47697	0.0213868
	0.105999	0.0184318		0.144001	0.0107343		2.48637	0.0214149
	0.103999	0.0184725		0.146001	0.0107747		2.49577	0.0214427
	0.101999	0.0185144		0.148001	0.0108154		2.50516	0.0214701
	0.0999991	0.0185576		0.150001	0.0108565		2.51456	0.0214968
	0.0979991	0.0186021		0.152001	0.0108979		2.52396	0.0215226
	0.0959991	0.0186479		0.154001	0.0109396		2.53336	0.0215476
	0.0939991	0.0186949		0.156001	0.0109816		2.54276	0.0215714
	0.0919991	0.0187432		0.158001	0.0110238		2.55215	0.0215941
	0.0899991	0.0187926		0.160001	0.0110662		2.56155	0.0216156
	0.0879991	0.0188433		0.162001	0.0111088		2.57095	0.021636
	0.0859991	0.0188952		0.164001	0.0111515		2.58035	0.0216553
	0.0839991	0.0189483		0.166001	0.0111943		2.58975	0.0216736
	0.0819991	0.0190025		0.168001	0.0112372		2.59914	0.0216909
	0.0799991	0.0190579		0.170001	0.0112801		2.60854	0.0217073
	0.0779991	0.0191144		0.172001	0.0113231		2.61794	0.021723
	0.075999	0.0191721		0.174001	0.011366		2.62734	0.0217381
	0.073999	0.0192309		0.176001	0.011409		2.63674	0.0217528
	0.071999	0.0192908		0.178001	0.0114518		2.64614	0.021767
	0.069999	0.0193517		0.180001	0.0114946		2.65553	0.021781
	0.067999	0.0194137		0.182001	0.0115372		2.66493	0.0217948
	0.065999	0.0194768		0.184001	0.0115798		2.67433	0.0218084
	0.063999	0.0195409		0.186001	0.0116221		2.68373	0.0218218
	0.061999	0.019606		0.188001	0.0116643		2.69313	0.0218351
	0.059999	0.0196722		0.190001	0.0117063		2.70252	0.0218483
	0.057999	0.0197393		0.192001	0.011748		2.71192	0.0218611
	0.055999	0.0198073		0.194001	0.0117895		2.72132	0.0218736
	0.053999	0.0198764		0.196001	0.0118307		2.73072	0.0218856
	0.051999	0.0199463		0.198001	0.0118717		2.74012	0.0218969
	0.049999	0.0200172		0.199999	0.0119123		2.74951	0.0219075
	0.047999	0.020089		0.197999	0.0119526		2.75891	0.0219171
	0.045999	0.0201616		0.195999	0.0119926		2.76831	0.0219255
	0.043999	0.0202351		0.193999	0.0120322		2.77771	0.0219325
	0.041999	0.0203095		0.191999	0.0120714		2.78711	0.0219381
	0.039999	0.0203846		0.189999	0.0121102		2.7965	0.0219421
	0.037999	0.0204606		0.187999	0.0121486		2.8059	0.0219443
	0.035999	0.0205374		0.185999	0.0121866		2.8153	0.0219446
	0.033999	0.0206149		0.183999	0.0122242		2.8247	0.0219431
	0.031999	0.0206932		0.181999	0.0122613		2.8341	0.0219397
	0.029999	0.0207722		0.179999	0.012298		2.84349	0.0219345
	0.027999	0.0208519		0.177999	0.0123341		2.85289	0.0219275
	0.0259989	0.0209323		0.175999	0.0123698		2.86229	0.021919
	0.023999	0.0210133		0.173999	0.012405		2.87169	0.021909
	0.0219989	0.021095		0.171999	0.0124397		2.88109	0.0218979
	0.0199989	0.0211773		0.169999	0.0124739		2.89048	0.021886
	0.0179989	0.0212603		0.167999	0.0125076		2.89988	0.0218736
	0.0159989	0.0213438		0.165999	0.0125407		2.90928	0.021861
	0.0139989	0.0214279		0.163999	0.0125734		2.91868	0.0218486
	0.0119989	0.0215125		0.161999	0.0126054		2.92808	0.0218369
	0.00999892	0.0215977		0.159999	0.0126369		2.93747	0.0218262
	0.00799892	0.0216833		0.157999	0.0126679		2.94687	0.0218169
	0.00599891	0.0217695		0.155999	0.0126983		2.95627	0.0218095
	0.00399891	0.0218561		0.153999	0.0127282		2.96567	0.0218042
	0.0019989	0.0219431		0.151999	0.0127575		2.97507	0.0218014
	1.1e-06	0.0220306		0.149999	0.0127863		2.98447	0.0218014
	0.0020011	0.0221184		0.147999	0.0128144		2.99386	0.0218044
	0.00400111	0.0222066		0.145999	0.012842		3.00326	0.0218106
	0.00600111	0.0222952		0.143999	0.0128691		3.01266	0.02182
	0.00800112	0.0223841		0.141999	0.0128956		3.02206	0.0218327
	0.0100011	0.0224734		0.139999	0.0129215		3.03146	0.0218486
	0.0120011	0.0225629		0.137999	0.0129468		3.04085	0.0218676
	0.0140011	0.0226527		0.135999	0.0129716		3.05025	0.0218896
	0.0160011	0.0227427		0.133999	0.0129958		3.05965	0.0219142
	0.0180011	0.0228329		0.131999	0.0130195		3.06905	0.0219412
	0.0200011	0.0229234		0.129999	0.0130426		3.07845	0.0219702
	0.0220011	0.0230141		0.127999	0.0130652		3.08784	0.0220008
	0.0240011	0.0231049		0.125999	0.0130872		3.09724	0.0220325
	0.0260012	0.0231958		0.123999	0.0131086		3.10664	0.0220649
	0.0280012	0.0232869		0.121999	0.0131296		3.11604	0.0220976
	0.0300012	0.023378		0.119999	0.01315		3.12544	0.02213
	0.0320012	0.0234693		0.117999	0.0131698		3.13483	0.0221617
	0.0340012	0.0235606		0.115999	0.0131892		3.14423	0.0221922
	0.0360012	0.0236519		0.113999	0.013208		3.15363	0.0222213
	0.0380012	0.0237432		0.111999	0.0132264		3.16303	0.0222485
	0.0400012	0.0238346		0.109999	0.0132442		3.17243	0.0222736
	0.0420012	0.0239259		0.107999	0.0132616		3.18182	0.0222963
	0.0440012	0.0240171		0.105999	0.0132784		3.19122	0.0223165
	0.0460012	0.0241083		0.103999	0.0132948		3.20062	0.0223342
	0.0480012	0.0241994		0.101999	0.0133107		3.21002	0.0223494
	0.0500012	0.0242904		0.0999988	0.0133262		3.21942	0.022362
	0.0520012	0.0243813		0.0979988	0.0133412		3.22881	0.0223724
	0.0540012	0.024472		0.0959988	0.0133558		3.23821	0.0223806
	0.0560012	0.0245625		0.0939988	0.01337		3.24761	0.022387
	0.0580012	0.0246528		0.0919988	0.0133837		3.25701	0.0223919
	0.0600012	0.024743		0.0899988	0.0133971		3.26641	0.0223957
	0.0620012	0.0248329		0.0879988	0.01341		3.2758	0.0223988
	0.0640012	0.0249225		0.0859988	0.0134226		3.2852	0.0224016
	0.0660012	0.0250119		0.0839988	0.0134348		3.2946	0.0224045
	0.0680012	0.025101		0.0819988	0.0134466		3.304	0.0224079
	0.0700012	0.0251898		0.0799988	0.0134581		3.3134	0.0224123
	0.0720012	0.0252782		0.0779988	0.0134692		3.3228	0.022418
	0.0740013	0.0253663		0.0759988	0.01348		3.33219	0.0224253
	0.0760013	0.0254541		0.0739988	0.0134905		3.34159	0.0224344
	0.0780013	0.0255415		0.0719987	0.0135007		3.35099	0.0224457
	0.0800013	0.0256284		0.0699987	0.0135107		3.36039	0.0224593
	0.0820013	0.025715		0.0679987	0.0135203		3.36979	0.0224751
	0.0840013	0.0258011		0.0659987	0.0135297		3.37918	0.0224933
	0.0860013	0.0258868		0.0639987	0.0135388		3.38858	0.0225137
	0.0880013	0.025972		0.0619987	0.0135476		3.39798	0.0225363
	0.0900013	0.0260567		0.0599987	0.0135563		3.40738	0.0225608
	0.0920013	0.026141		0.0579987	0.0135647		3.41678	0.0225869
	0.0940013	0.0262247		0.0559987	0.0135729		3.42617	0.0226145
	0.0960013	0.0263079		0.0539987	0.013581		3.43557	0.022643
	0.0980013	0.0263905		0.0519987	0.0135888		3.44497	0.0226723
	0.100001	0.0264726		0.0499987	0.0135965		3.45437	0.0227018
	0.102001	0.026554		0.0479987	0.013604		3.46377	0.0227312
	0.104001	0.0266349		0.0459987	0.0136114		3.47316	0.0227602
	0.106001	0.0267152		0.0439987	0.0136187		3.48256	0.0227883
	0.108001	0.0267949		0.0419987	0.0136258		3.49196	0.0228153
	0.110001	0.026874		0.0399987	0.0136328		3.50136	0.0228409
	0.112001	0.0269523		0.0379987	0.0136398		3.51076	0.0228649
	0.114001	0.0270301		0.0359987	0.0136466		3.52015	0.0228872
	0.116001	0.0271071		0.0339987	0.0136534		3.52955	0.0229076
	0.118001	0.0271835		0.0319987	0.0136601		3.53895	0.0229262
	0.120001	0.0272592		0.0299987	0.0136668		3.54835	0.022943
	0.122001	0.0273342		0.0279987	0.0136734		3.55775	0.0229582
	0.124001	0.0274084		0.0259987	0.01368		3.56714	0.0229719
	0.126001	0.0274819		0.0239986	0.0136866		3.57654	0.0229844
	0.128001	0.0275547		0.0219986	0.0136932		3.58594	0.0229961
	0.130001	0.0276267		0.0199986	0.0136998		3.59534	0.0230072
	0.132001	0.027698		0.0179986	0.0137064		3.60474	0.0230183
	0.134001	0.0277685		0.0159986	0.013713		3.61413	0.0230296
	0.136001	0.0278382		0.0139986	0.0137197		3.62353	0.0230417
	0.138001	0.0279071		0.0119986	0.0137264		3.63293	0.0230548
	0.140001	0.0279752		0.00999862	0.0137331		3.64233	0.0230695
	0.142001	0.0280425		0.00799862	0.01374		3.65173	0.0230861
	0.144001	0.028109		0.00599861	0.0137468		3.66113	0.0231048
	0.146001	0.0281747		0.00399861	0.0137538		3.67052	0.023126
	0.148001	0.0282395		0.0019986	0.0137609		3.67992	0.0231497
	0.150001	0.0283035		1.4e-06	0.0137681		3.68932	0.0231762
	0.152001	0.0283667		0.0020014	0.0137753		3.69872	0.0232054
	0.154001	0.028429		0.00400141	0.0137827		3.70812	0.0232372
	0.156001	0.0284905		0.00600141	0.0137902		3.71751	0.0232716
	0.158001	0.0285511		0.00800142	0.0137978		3.72691	0.0233082
	0.160001	0.0286108		0.0100014	0.0138056		3.73631	0.0233468
	0.162001	0.0286697		0.0120014	0.0138135		3.74571	0.0233869
	0.164001	0.0287277		0.0140014	0.0138215		3.75511	0.0234282
	0.166001	0.0287849		0.0160014	0.0138297		3.7645	0.0234702
	0.168001	0.0288411		0.0180014	0.013838		3.7739	0.0235122
	0.170001	0.0288965		0.0200014	0.0138466		3.7833	0.0235538
	0.172001	0.028951		0.0220014	0.0138552		3.7927	0.0235944
	0.174001	0.0290046		0.0240015	0.0138641		3.8021	0.0236334
	0.176001	0.0290573		0.0260014	0.0138731		3.81149	0.0236704
	0.178001	0.0291092		0.0280015	0.0138823		3.82089	0.0237048
	0.180001	0.0291601		0.0300015	0.0138917		3.83029	0.0237362
	0.182001	0.0292102		0.0320015	0.0139013		3.83969	0.0237643
	0.184001	0.0292594		0.0340015	0.013911		3.84909	0.0237888
	0.186001	0.0293077		0.0360015	0.013921		3.85848	0.0238096
	0.188001	0.0293551		0.0380015	0.0139311		3.86788	0.0238265
	0.190001	0.0294016		0.0400015	0.0139415		3.87728	0.0238397
	0.192001	0.0294473		0.0420015	0.013952		3.88668	0.0238492
	0.194001	0.029492		0.0440015	0.0139628		3.89608	0.0238554
	0.196001	0.0295359		0.0460015	0.0139737		3.90547	0.0238585
	0.198001	0.0295789		0.0480015	0.0139849		3.91487	0.0238591
	0.200001	0.0296211		0.0500015	0.0139963		3.92427	0.0238577
	0.202002	0.0296623		0.0520015	0.0140078		3.93367	0.0238549
	0.204002	0.0297027		0.0540015	0.0140196		3.94307	0.0238514
	0.206002	0.0297423		0.0560015	0.0140316		3.95246	0.0238479
	0.208002	0.029781		0.0580015	0.0140438		3.96186	0.0238451
	0.210002	0.0298188		0.0600015	0.0140562		3.97126	0.0238438
	0.212002	0.0298558		0.0620015	0.0140688		3.98066	0.0238446
	0.214002	0.029892		0.0640015	0.0140816		3.99006	0.0238484
	0.216002	0.0299273		0.0660015	0.0140946		3.99946	0.0238557
	0.218002	0.0299618		0.0680015	0.0141078		4.00885	0.0238671
	0.220002	0.0299955		0.0700015	0.0141212		4.01825	0.0238831
	0.222002	0.0300284		0.0720015	0.0141347		4.02765	0.0239039
	0.224002	0.0300605		0.0740015	0.0141485		4.03705	0.02393
	0.226002	0.0300918		0.0760016	0.0141625		4.04645	0.0239613
	0.228002	0.0301223		0.0780016	0.0141767		4.05584	0.0239979
	0.230002	0.030152		0.0800016	0.014191		4.06524	0.0240397
	0.232002	0.0301809		0.0820016	0.0142056		4.07464	0.0240864
	0.234002	0.0302091		0.0840016	0.0142203		4.08404	0.0241375
	0.236002	0.0302365		0.0860016	0.0142352		4.09344	0.0241925
	0.238002	0.0302632		0.0880016	0.0142502		4.10283	0.0242509
	0.240002	0.0302892		0.0900016	0.0142654		4.11223	0.0243118
	0.242002	0.0303145		0.0920016	0.0142808		4.12163	0.0243744
	0.244002	0.030339		0.0940016	0.0142964		4.13103	0.0244379
	0.246002	0.0303628		0.0960016	0.0143121		4.14043	0.0245014
	0.248002	0.030386		0.0980016	0.014328		4.14982	0.0245638
	0.250002	0.0304085		0.100002	0.014344		4.15922	0.0246243
	0.252002	0.0304303		0.102002	0.0143601		4.16862	0.024682
	0.254002	0.0304515		0.104002	0.0143764		4.17802	0.024736
	0.256002	0.030472		0.106002	0.0143928		4.18742	0.0247855
	0.258002	0.0304919		0.108002	0.0144093		4.19681	0.0248297
	0.260002	0.0305112		0.110002	0.014426		4.20621	0.0248682
	0.262002	0.0305299		0.112002	0.0144428		4.21561	0.0249004
	0.264002	0.0305481		0.114002	0.0144597		4.22501	0.0249261
	0.266002	0.0305656		0.116002	0.0144767		4.23441	0.024945
	0.268002	0.0305826		0.118002	0.0144938		4.2438	0.0249571
	0.270002	0.030599		0.120002	0.014511		4.2532	0.0249625
	0.272002	0.0306149		0.122002	0.0145282		4.2626	0.0249616
	0.274002	0.0306303		0.124002	0.0145456		4.272	0.0249548
	0.276002	0.0306453		0.126002	0.014563		4.2814	0.0249427
	0.278002	0.0306597		0.128002	0.0145806		4.29079	0.0249259
	0.280002	0.0306736		0.130002	0.0145981		4.30019	0.0249054
	0.282002	0.0306871		0.132002	0.0146158		4.30959	0.024882
	0.284002	0.0307002		0.134002	0.0146335		4.31899	0.0248568
	0.286002	0.0307128		0.136002	0.0146512		4.32839	0.0248309
	0.288002	0.030725		0.138002	0.014669		4.33779	0.0248054
	0.290002	0.0307369		0.140002	0.0146868		4.34718	0.0247814
	0.292002	0.0307483		0.142002	0.0147047		4.35658	0.02476
	0.294002	0.0307594		0.144002	0.0147226		4.36598	0.0247423
	0.296002	0.0307702		0.146002	0.0147405		4.37538	0.0247293
	0.298002	0.0307806		0.148002	0.0147584		4.38478	0.024722
	0.300002	0.0307907		0.150002	0.0147763		4.39417	0.0247211
	0.302002	0.0308006		0.152002	0.0147943		4.40357	0.0247274
	0.304002	0.0308101		0.154002	0.0148122		4.41297	0.0247414
	0.306002	0.0308194		0.156002	0.0148301		4.42237	0.0247635
	0.308002	0.0308285		0.158002	0.0148481		4.43177	0.024794
	0.310002	0.0308373		0.160002	0.014866		4.44116	0.024833
	0.312002	0.0308459		0.162002	0.0148839		4.45056	0.0248803
	0.314002	0.0308543		0.164002	0.0149017		4.45996	0.0249358
	0.316002	0.0308625		0.166002	0.0149196		4.46936	0.0249989
	0.318002	0.0308706		0.168002	0.0149374		4.47876	0.0250692
	0.320002	0.0308785		0.170002	0.0149551		4.48815	0.0251459
	0.322002	0.0308864		0.172002	0.0149728		4.49755	0.0252281
	0.324002	0.0308941		0.174002	0.0149905		4.50695	0.025315
	0.326002	0.0309017		0.176002	0.0150081		4.51635	0.0254054
	0.328002	0.0309092		0.178002	0.0150257		4.52575	0.0254982
	0.330002	0.0309167		0.180002	0.0150432		4.53514	0.0255924
	0.332002	0.0309241		0.182002	0.0150607		4.54454	0.0256866
	0.334002	0.0309316		0.184002	0.0150781		4.55394	0.0257798
	0.336002	0.030939		0.186002	0.0150954		4.56334	0.0258708
	0.338002	0.0309464		0.188002	0.0151126		4.57274	0.0259584
	0.340002	0.0309538		0.190002	0.0151298		4.58213	0.0260418
	0.342002	0.0309613		0.192002	0.0151469		4.59153	0.0261198
	0.344002	0.0309689		0.194002	0.015164		4.60093	0.0261918
	0.346002	0.0309765		0.196002	0.0151809		4.61033	0.0262569
	0.348002	0.0309843		0.198002	0.0151978		4.61973	0.0263148
	0.350002	0.0309921		0.200002	0.0152146		4.62912	0.0263649
	0.352002	0.0310001		0.202002	0.0152313		4.63852	0.0264071
	0.354002	0.0310082		0.204002	0.0152479		4.64792	0.0264412
	0.356002	0.0310164		0.206002	0.0152644		4.65732	0.0264673
	0.358002	0.0310249		0.208002	0.0152809		4.66672	0.0264858
	0.360002	0.0310335		0.210002	0.0152972		4.67612	0.026497
	0.362002	0.0310423		0.212002	0.0153135		4.68551	0.0265014
	0.364002	0.0310514		0.214002	0.0153297		4.69491	0.0264997
	0.366002	0.0310607		0.216002	0.0153458		4.70431	0.0264927
	0.368002	0.0310703		0.218002	0.0153618		4.71371	0.0264814
	0.370002	0.0310801		0.220002	0.0153777		4.72311	0.0264665
	0.372002	0.0310902		0.222002	0.0153935		4.7325	0.0264493
	0.374002	0.0311006		0.224002	0.0154093		4.7419	0.0264307
	0.376002	0.0311113		0.226002	0.0154249		4.7513	0.0264119
	0.378002	0.0311224		0.228002	0.0154405		4.7607	0.0263938
	0.380002	0.0311337		0.230002	0.015456		4.7701	0.0263775
	0.382002	0.0311455		0.232002	0.0154714		4.77949	0.026364
	0.384002	0.0311576		0.234002	0.0154868		4.78889	0.0263542
	0.386002	0.0311701		0.236002	0.015502		4.79829	0.0263489
	0.388002	0.031183		0.238002	0.0155172		4.80769	0.0263488
	0.390002	0.0311963		0.240002	0.0155323		4.81709	0.0263545
	0.392002	0.03121		0.242002	0.0155473		4.82648	0.0263665
	0.394002	0.0312242		0.244002	0.0155623		4.83588	0.0263849
	0.396002	0.0312388		0.246002	0.0155772		4.84528	0.0264101
	0.398002	0.0312539		0.248002	0.0155921		4.85468	0.026442
	0.400002	0.0312694		0.250002	0.0156069		4.86408	0.0264805
	0.402002	0.0312854		0.252002	0.0156216		4.87347	0.0265253
	0.404002	0.031302		0.254002	0.0156363		4.88287	0.0265761
	0.406002	0.031319		0.256002	0.015651		4.89227	0.0266321
	0.408002	0.0313366		0.258002	0.0156656		4.90167	0.0266929
	0.410002	0.0313547		0.260002	0.0156801		4.91107	0.0267577
	0.412002	0.0313733		0.262002	0.0156947		4.92046	0.0268255
	0.414002	0.0313925		0.264002	0.0157092		4.92986	0.0268957
	0.416002	0.0314122		0.266002	0.0157237		4.93926	0.0269671
	0.418002	0.0314326		0.268002	0.0157382		4.94866	0.0270389
	0.420002	0.0314535		0.270002	0.0157526		4.95806	0.0271101
	0.422002	0.031475		0.272002	0.0157671		4.96745	0.0271797
	0.424002	0.0314971		0.274002	0.0157815		4.97685	0.0272469
	0.426002	0.0315198		0.276002	0.015796		4.98625	0.0273108
	0.428002	0.0315431		0.278002	0.0158105		4.99565	0.0273706
	0.430002	0.0315671		0.280002	0.0158249		5.00505	0.0274257
	0.432002	0.0315917		0.282002	0.0158395		5.01445	0.0274755
	0.434002	0.0316169		0.284002	0.015854		5.02384	0.0275195
	0.436002	0.0316428		0.286002	0.0158686		5.03324	0.0275574
	0.438002	0.0316693		0.288002	0.0158832		5.04264	0.027589
	0.440002	0.0316965		0.290002	0.0158978		5.05204	0.0276143
	0.442002	0.0317244		0.292002	0.0159125		5.06144	0.0276333
	0.444002	0.031753		0.294002	0.0159273		5.07083	0.0276463
	0.446002	0.0317822		0.296002	0.0159421		5.08023	0.0276535
	0.448002	0.0318121		0.298002	0.015957		5.08963	0.0276555
	0.449998	0.0318427		0.300002	0.015972		5.09903	0.0276527
	0.447998	0.0318741		0.302002	0.0159871		5.10843	0.0276459
	0.445998	0.0319061		0.304002	0.0160022		5.11782	0.0276359
	0.443998	0.0319388		0.306002	0.0160175		5.12722	0.0276234
	0.441998	0.0319723		0.308002	0.0160329		5.13662	0.0276094
	0.439998	0.0320064		0.310002	0.0160483		5.14602	0.0275947
	0.437998	0.0320413		0.312002	0.0160639		5.15542	0.0275802
	0.435998	0.032077		0.314002	0.0160797		5.16481	0.027567
	0.433998	0.0321133		0.316002	0.0160955		5.17421	0.0275559
	0.431998	0.0321504		0.318002	0.0161115		5.18361	0.0275477
	0.429998	0.0321882		0.320002	0.0161276		5.19301	0.0275433
	0.427998	0.0322267		0.322002	0.0161439		5.20241	0.0275434
	0.425998	0.032266		0.324002	0.0161604		5.2118	0.0275487
	0.423998	0.0323061		0.326002	0.016177		5.2212	0.0275597
	0.421998	0.0323468		0.328002	0.0161938		5.2306	0.0275768
	0.419998	0.0323883		0.330002	0.0162107		5.24	0.0276005
	0.417998	0.0324306		0.332002	0.0162279		5.2494	0.0276309
	0.415998	0.0324736		0.334002	0.0162452		5.25879	0.0276681
	0.413998	0.0325173		0.336002	0.0162628		5.26819	0.027712
	0.411998	0.0325618		0.338002	0.0162805		5.27759	0.0277626
	0.409998	0.0326071		0.340002	0.0162984		5.28699	0.0278196
	0.407998	0.032653		0.342002	0.0163166		5.29639	0.0278826
	0.405998	0.0326998		0.344002	0.016335		5.30578	0.0279511
	0.403998	0.0327472		0.346002	0.0163536		5.31518	0.0280245
	0.401998	0.0327954		0.348002	0.0163724		5.32458	0.0281022
	0.399998	0.0328444		0.350002	0.0163915		5.33398	0.0281835
	0.397998	0.032894		0.352002	0.0164108		5.34338	0.0282676
	0.395998	0.0329445		0.354002	0.0164304		5.35277	0.0283537
	0.393998	0.0329956		0.356002	0.0164502		5.36217	0.0284411
	0.391998	0.0330475		0.358002	0.0164703		5.37157	0.0285288
	0.389998	0.0331001		0.360002	0.0164906		5.38097	0.0286161
	0.387998	0.0331534		0.362002	0.0165112		5.39037	0.0287022
	0.385998	0.0332075		0.364002	0.0165321		5.39977	0.0287864
	0.383998	0.0332622		0.366002	0.0165533		5.40916	0.028868
	0.381998	0.0333177		0.368002	0.0165747		5.41856	0.0289463
	0.379998	0.0333739		0.370002	0.0165964		5.42796	0.0290208
	0.377998	0.0334308		0.372002	0.0166184		5.43736	0.029091
	0.375998	0.0334884		0.374002	0.0166407		5.44676	0.0291566
	0.373998	0.0335467		0.376002	0.0166632		5.45615	0.0292173
	0.371998	0.0336057		0.378002	0.0166861		5.46555	0.0292729
	0.369998	0.0336653		0.380002	0.0167093		5.47495	0.0293233
	0.367998	0.0337257		0.382002	0.0167327		5.48435	0.0293686
	0.365998	0.0337867		0.384002	0.0167565		5.49375	0.0294088
	0.363998	0.0338484		0.386002	0.0167806		5.50314	0.0294441
	0.361998	0.0339107		0.388002	0.016805		5.51254	0.0294749
	0.359998	0.0339737		0.390002	0.0168296		5.52194	0.0295013
	0.357998	0.0340374		0.392002	0.0168546		5.53134	0.0295239
	0.355998	0.0341017		0.394002	0.0168799		5.54074	0.0295431
	0.353998	0.0341666		0.396002	0.0169056		5.55013	0.0295593
	0.351998	0.0342322		0.398002	0.0169315		5.55953	0.0295731
	0.349998	0.0342983		0.400002	0.0169577		5.56893	0.0295849
	0.347998	0.0343651		0.402002	0.0169843		5.57833	0.0295954
	0.345998	0.0344325		0.404002	0.0170111		5.58773	0.0296049
	0.343998	0.0345005		0.406002	0.0170383		5.59712	0.0296139
	0.341998	0.0345691		0.408002	0.0170658		5.60652	0.029623
	0.339998	0.0346383		0.410002	0.0170936		5.61592	0.0296324
	0.337998	0.034708		0.412002	0.0171217		5.62532	0.0296425
	0.335998	0.0347783		0.414002	0.0171501		5.63472	0.0296535
	0.333998	0.0348492		0.416002	0.0171788		5.64411	0.0296657
	0.331998	0.0349206		0.418002	0.0172078		5.65351	0.0296792
	0.329998	0.0349925		0.420002	0.0172371		5.66291	0.029694
	0.327998	0.035065		0.422002	0.0172667		5.67231	0.0297102
	0.325998	0.0351379		0.424002	0.0172966		5.68171	0.0297276
	0.323998	0.0352114		0.426002	0.0173268		5.69111	0.0297461
	0.321998	0.0352854		0.428002	0.0173573		5.7005	0.0297654
	0.319998	0.0353599		0.430002	0.0173881		5.7099	0.0297854
	0.317998	0.0354348		0.432002	0.0174191		5.7193	0.0298056
	0.315998	0.0355103		0.434002	0.0174505		5.7287	0.0298259
	0.313998	0.0355862		0.436002	0.0174821		5.7381	0.0298457
	0.311998	0.0356625		0.438002	0.017514		5.74749	0.0298647
	0.309998	0.0357393		0.440002	0.0175461		5.75689	0.0298826
	0.307998	0.0358164		0.442002	0.0175785		5.76629	0.029899
	0.305998	0.0358941		0.444002	0.0176112		5.77569	0.0299135
	0.303998	0.0359721		0.446002	0.0176441		5.78508	0.0299259
	0.301998	0.0360505		0.448002	0.0176772		5.79448	0.0299359
	0.299998	0.0361293		0.450002	0.0177106		5.80388	0.0299433
	0.297998	0.0362084		0.452002	0.0177443		5.81328	0.029948
	0.295998	0.0362879		0.454002	0.0177781		5.82268	0.0299498
	0.293998	0.0363678		0.456002	0.0178122		5.83208	0.0299489
	0.291998	0.036448		0.458002	0.0178465		5.84147	0.0299451
	0.289998	0.0365285		0.460002	0.017881		5.85087	0.0299388
	0.287998	0.0366094		0.462002	0.0179157		5.86027	0.0299301
	0.285998	0.0366905		0.464002	0.0179506		5.86967	0.0299192
	0.283998	0.0367719		0.466002	0.0179856		5.87907	0.0299066
	0.281998	0.0368537		0.468002	0.0180209		5.88846	0.0298926
	0.279998	0.0369356		0.470002	0.0180563		5.89786	0.0298778
	0.277998	0.0370178		0.472002	0.0180919		5.90726	0.0298625
	0.275998	0.0371003		0.474002	0.0181276		5.91666	0.0298473
	0.273998	0.037183		0.476002	0.0181635		5.92606	0.0298327
	0.271998	0.0372659		0.478002	0.0181995		5.93545	0.0298193
	0.269998	0.037349		0.480002	0.0182357		5.94485	0.0298077
	0.267998	0.0374323		0.482002	0.0182719		5.95425	0.0297983
	0.265998	0.0375158		0.484002	0.0183083		5.96365	0.0297916
	0.263998	0.0375994		0.486002	0.0183448		5.97305	0.0297881
	0.261998	0.0376832		0.488002	0.0183814		5.98244	0.0297882
	0.259998	0.0377671		0.490002	0.018418		5.99184	0.0297923
	0.257998	0.0378512		0.492002	0.0184548		6.00124	0.0298007
	0.255998	0.0379354		0.494002	0.0184916		6.01064	0.0298136
	0.253998	0.0380196		0.496002	0.0185284		6.02004	0.0298311
	0.251998	0.038104		0.498002	0.0185653		6.02943	0.0298535
	0.249998	0.0381884		0.500002	0.0186023		6.03883	0.0298807
	0.247998	0.0382729		0.502002	0.0186393		6.04823	0.0299128
	0.245998	0.0383574		0.504002	0.0186763		6.05763	0.0299496
	0.243998	0.038442		0.506002	0.0187133		6.06703	0.0299911
	0.241998	0.0385266		0.508002	0.0187503		6.07643	0.030037
	0.239998	0.0386112		0.510002	0.0187873		6.08582	0.0300873
	0.237998	0.0386957		0.512002	0.0188242		6.09522	0.0301416
	0.235998	0.0387803		0.514002	0.0188612		6.10462	0.0301997
	0.233998	0.0388648		0.516002	0.0188981		6.11402	0.0302613
	0.231998	0.0389493		0.518002	0.018935		6.12342	0.0303262
	0.229998	0.0390337		0.520002	0.0189718		6.13281	0.0303941
	0.227998	0.0391181		0.522002	0.0190085		6.14221	0.0304648
	0.225998	0.0392023		0.524002	0.0190451		6.15161	0.0305379
	0.223997	0.0392865		0.526003	0.0190817		6.16101	0.0306133
	0.221997	0.0393705		0.528003	0.0191182		6.17041	0.0306907
	0.219998	0.0394544		0.530003	0.0191546		6.1798	0.0307699
	0.217998	0.0395382		0.532003	0.0191908		6.1892	0.0308509
	0.215998	0.0396218		0.534003	0.0192269		6.1986	0.0309333
	0.213998	0.0397052		0.536003	0.0192629		6.208	0.0310172
	0.211998	0.0397884		0.538003	0.0192988		6.2174	0.0311022
	0.209998	0.0398715		0.540003	0.0193345		6.22679	0.0311885
	0.207998	0.0399543		0.542003	0.01937		6.23619	0.0312757
	0.205998	0.0400369		0.544003	0.0194054		6.24559	0.0313637
	0.203997	0.0401193		0.546002	0.0194406		6.25499	0.0314525
	0.201997	0.0402014		0.548002	0.0194756		6.26439	0.0315418
	0.199997	0.0402832		0.550002	0.0195104		6.27378	0.0316314
	0.197997	0.0403648		0.552002	0.019545		6.28318	0.0317212
	0.195997	0.040446		0.554002	0.0195794		6.29258	0.0318107
	0.193997	0.040527		0.556002	0.0196136		6.30198	0.0318997
	0.191997	0.0406076		0.558002	0.0196475		6.31138	0.0319878
	0.189998	0.0406879		0.560002	0.0196812		6.32077	0.0320746
	0.187998	0.0407678		0.562002	0.0197147		6.33017	0.0321597
	0.185998	0.0408474		0.564002	0.0197479		6.33957	0.0322426
	0.183998	0.0409266		0.566002	0.0197809		6.34897	0.0323227
	0.181998	0.0410054		0.568002	0.0198135		6.35837	0.0323996
	0.179998	0.0410838		0.570002	0.019846		6.36776	0.0324726
	0.177998	0.0411617		0.572002	0.0198781		6.37716	0.0325413
	0.175998	0.0412392		0.574002	0.0199099		6.38656	0.032605
	0.173997	0.0413163		0.576003	0.0199415		6.39596	0.0326633
	0.171997	0.0413929		0.578003	0.0199728		6.40536	0.0327158
	0.169997	0.0414691		0.580003	0.0200037		6.41476	0.0327618
	0.167997	0.0415447		0.582003	0.0200344		6.42415	0.0328012
	0.165997	0.0416199		0.584003	0.0200647		6.43355	0.0328337
	0.163997	0.0416945		0.586003	0.0200948		6.44295	0.032859
	0.161997	0.0417686		0.588003	0.0201244		6.45235	0.032877
	0.159997	0.0418421		0.590003	0.0201538		6.46175	0.0328879
	0.157997	0.0419151		0.592003	0.0201829		6.47114	0.0328917
	0.155997	0.0419875		0.594003	0.0202116		6.48054	0.0328887
	0.153997	0.0420593		0.596003	0.0202399		6.48994	0.0328793
	0.151997	0.0421306		0.598003	0.0202679		6.49934	0.032864
	0.149997	0.0422012		0.600003	0.0202956		6.50874	0.0328434
	0.147997	0.0422712		0.602003	0.0203229		6.51813	0.0328183
	0.145997	0.0423405		0.604003	0.0203499		6.52753	0.0327894
	0.143997	0.0424092		0.606003	0.0203765		6.53693	0.0327577
	0.141997	0.0424773		0.608003	0.0204027		6.54633	0.0327241
	0.139997	0.0425446		0.610003	0.0204286		6.55573	0.0326896
	0.137997	0.0426113		0.612003	0.0204542		6.56512	0.0326554
	0.135997	0.0426772		0.614003	0.0204793		6.57452	0.0326224
	0.133997	0.0427425		0.616003	0.0205041		6.58392	0.0325917
	0.131997	0.042807		0.618003	0.0205286		6.59332	0.0325643
	0.129997	0.0428707		0.620003	0.0205526		6.60272	0.0325412
	0.127997	0.0429337		0.622003	0.0205764		6.61211	0.0325232
	0.125997	0.042996		0.624003	0.0205997		6.62151	0.0325112
	0.123997	0.0430574		0.626003	0.0206227		6.63091	0.0325059
	0.121997	0.0431181		0.628003	0.0206453		6.64031	0.0325078
	0.119997	0.043178		0.630003	0.0206675		6.64971	0.0325174
	0.117997	0.043237		0.632003	0.0206894		6.6591	0.0325349
	0.115997	0.0432952		0.634003	0.020711		6.6685	0.0325607
	0.113997	0.0433526		0.636003	0.0207321		6.6779	0.0325946
	0.111997	0.0434091		0.638003	0.0207529		6.6873	0.0326366
	0.109997	0.0434648		0.640003	0.0207734		6.6967	0.0326864
	0.107997	0.0435195		0.642003	0.0207935		6.70609	0.0327438
	0.105997	0.0435734		0.644003	0.0208132		6.71549	0.0328081
	0.103997	0.0436264		0.646003	0.0208326		6.72489	0.0328788
	0.101997	0.0436785		0.648003	0.0208517		6.73429	0.0329553
	0.0999973	0.0437297		0.650003	0.0208704		6.74369	0.0330368
	0.0979973	0.0437799		0.652003	0.0208888		6.75308	0.0331225
	0.0959973	0.0438292		0.654003	0.0209068		6.76248	0.0332118
	0.0939973	0.0438775		0.656003	0.0209246		6.77188	0.0333037
	0.0919973	0.0439249		0.658003	0.0209419		6.78128	0.0333974
	0.0899973	0.0439712		0.660003	0.020959		6.79068	0.0334924
	0.0879973	0.0440166		0.662003	0.0209758		6.80007	0.0335877
	0.0859973	0.0440611		0.664003	0.0209922		6.80947	0.0336828
	0.0839973	0.0441045		0.666003	0.0210084		6.81887	0.0337772
	0.0819973	0.0441469		0.668003	0.0210242		6.82827	0.0338703
	0.0799973	0.0441882		0.670003	0.0210398		6.83767	0.0339618
	0.0779973	0.0442286		0.672003	0.021055		6.84707	0.0340513
	0.0759973	0.0442679		0.674003	0.02107		6.85646	0.0341388
	0.0739972	0.0443061		0.676003	0.0210847		6.86586	0.0342241
	0.0719972	0.0443433		0.678003	0.0210992		6.87526	0.0343072
	0.0699972	0.0443794		0.680003	0.0211133		6.88466	0.0343881
	0.0679972	0.0444145		0.682003	0.0211273		6.89406	0.0344671
	0.0659972	0.0444485		0.684003	0.021141		6.90345	0.0345443
	0.0639972	0.0444813		0.686003	0.0211544		6.91285	0.0346199
	0.0619972	0.0445131		0.688003	0.0211676		6.92225	0.0346943
	0.0599972	0.0445438		0.690003	0.0211806		6.93165	0.0347677
	0.0579972	0.0445734		0.692003	0.0211933		6.94105	0.0348403
	0.0559972	0.0446018		0.694003	0.0212059		6.95044	0.0349124
	0.0539972	0.0446291		0.696003	0.0212183		6.95984	0.0349842
	0.0519972	0.0446553		0.698003	0.0212304		6.96924	0.0350559
	0.0499972	0.0446804		0.700003	0.0212424		6.97864	0.0351275
	0.0479972	0.0447043		0.702003	0.0212542		6.98804	0.0351991
	0.0459972	0.0447271		0.704003	0.0212658		6.99743	0.0352705
	0.0439972	0.0447487		0.706003	0.0212773		7.00683	0.0353417
	0.0419972	0.0447692		0.708003	0.0212886		7.01623	0.0354124
	0.0399972	0.0447885		0.710003	0.0212998		7.02563	0.0354823
	0.0379972	0.0448066		0.712003	0.0213108		7.03503	0.0355511
	0.0359972	0.0448236		0.714003	0.0213218		7.04442	0.0356181
	0.0339972	0.0448394		0.716003	0.0213325		7.05382	0.0356831
	0.0319972	0.044854		0.718003	0.0213432		7.06322	0.0357454
	0.0299972	0.0448675		0.720003	0.0213538		7.07262	0.0358044
	0.0279972	0.0448798		0.722003	0.0213643		7.08202	0.0358597
	0.0259972	0.0448909		0.724003	0.0213748		7.09141	0.0359106
	0.0239971	0.0449008		0.726003	0.0213851		7.10081	0.0359566
	0.0219971	0.0449095		0.728003	0.0213954		7.11021	0.0359973
	0.0199971	0.044917		0.730003	0.0214056		7.11961	0.0360323
	0.0179971	0.0449234		0.732003	0.0214158		7.12901	0.0360613
	0.0159971	0.0449286		0.734003	0.0214259		7.13841	0.0360842
	0.0139971	0.0449325		0.736003	0.0214361		7.1478	0.0361008
	0.0119971	0.0449353		0.738003	0.0214462		7.1572	0.0361112
	0.0099971	0.044937		0.740003	0.0214562		7.1666	0.0361157
	0.0079971	0.0449374		0.742003	0.0214663		7.176	0.0361145
	0.0059971	0.0449366		0.744003	0.0214764		7.1854	0.0361083
	0.0039971	0.0449347		0.746003	0.0214865		7.19479	0.0360975
	0.0019971	0.0449316		0.748003	0.0214967		7.20419	0.036083
	2.9e-06	0.0449273		0.750003	0.0215068		7.21359	0.0360657
	0.0020029	0.0449219		0.752003	0.021517		7.22299	0.0360465
	0.0040029	0.0449152		0.754003	0.0215273		7.23239	0.0360265
	0.0060029	0.0449075		0.756003	0.0215376		7.24178	0.0360068
	0.0080029	0.0448985		0.758003	0.0215479		7.25118	0.0359886
	0.0100029	0.0448884		0.760003	0.0215584		7.26058	0.0359729
	0.0120029	0.0448772		0.762003	0.0215689		7.26998	0.0359611
	0.0140029	0.0448648		0.764003	0.0215795		7.27938	0.0359541
	0.0160029	0.0448513		0.766003	0.0215902		7.28877	0.035953
	0.0180029	0.0448366		0.768003	0.021601		7.29817	0.0359588
	0.0200029	0.0448209		0.770003	0.0216119		7.30757	0.0359721
	0.0220029	0.044804		0.772003	0.0216229		7.31697	0.0359938
	0.0240029	0.044786		0.774003	0.021634		7.32637	0.0360241
	0.026003	0.0447669		0.776003	0.0216453		7.33576	0.0360635
	0.028003	0.0447468		0.778003	0.0216567		7.34516	0.036112
	0.030003	0.0447255		0.780003	0.0216683		7.35456	0.0361695
	0.032003	0.0447032		0.782003	0.02168		7.36396	0.0362358
	0.034003	0.0446798		0.784003	0.0216918		7.37336	0.0363102
	0.036003	0.0446554		0.786003	0.0217038		7.38276	0.036392
	0.038003	0.04463		0.788003	0.021716		7.39215	0.0364805
	0.040003	0.0446035		0.790003	0.0217283		7.40155	0.0365744
	0.042003	0.044576		0.792003	0.0217408		7.41095	0.0366726
	0.044003	0.0445475		0.794003	0.0217535		7.42035	0.0367737
	0.046003	0.044518		0.796003	0.0217663		7.42974	0.0368764
	0.048003	0.0444876		0.798003	0.0217794		7.43914	0.0369792
	0.050003	0.0444562		0.800003	0.0217926		7.44854	0.0370805
	0.052003	0.0444239		0.802003	0.0218061		7.45794	0.0371788
	0.054003	0.0443906		0.804003	0.0218197		7.46734	0.0372728
	0.056003	0.0443564		0.806003	0.0218335		7.47673	0.037361
	0.058003	0.0443213		0.808003	0.0218476		7.48613	0.0374421
	0.060003	0.0442854		0.810003	0.0218618		7.49553	0.0375152
	0.062003	0.0442486		0.812003	0.0218762		7.50493	0.0375791
	0.064003	0.0442109		0.814003	0.0218909		7.51433	0.0376331
	0.066003	0.0441724		0.816003	0.0219058		7.52373	0.0376767
	0.068003	0.0441331		0.818003	0.0219209		7.53312	0.0377096
	0.070003	0.0440931		0.820003	0.0219362		7.54252	0.0377316
	0.072003	0.0440522		0.822003	0.0219517		7.55192	0.0377429
	0.074003	0.0440106		0.824003	0.0219674		7.56132	0.0377439
	0.0760031	0.0439683		0.826003	0.0219834		7.57072	0.0377351
	0.0780031	0.0439253		0.828003	0.0219995		7.58011	0.0377173
	0.0800031	0.0438815		0.830003	0.0220159		7.58951	0.0376915
	0.0820031	0.0438372		0.832003	0.0220325		7.59891	0.037659
	0.0840031	0.0437921		0.834003	0.0220494		7.60831	0.0376209
	0.0860031	0.0437465		0.836003	0.0220664		7.61771	0.0375786
	0.0880031	0.0437003		0.838003	0.0220837		7.6271	0.0375338
	0.0900031	0.0436535		0.840003	0.0221012		7.6365	0.0374878
	0.0920031	0.0436061		0.842003	0.0221189		7.6459	0.0374423
	0.0940031	0.0435582		0.844003	0.0221368		7.6553	0.0373986
	0.0960031	0.0435099		0.846003	0.0221549		7.6647	0.0373584
	0.0980031	0.043461		0.848003	0.0221732		7.67409	0.0373228
	0.100003	0.0434117		0.850003	0.0221918		7.68349	0.0372932
	0.102003	0.043362		0.852003	0.0222105		7.69289	0.0372706
	0.104003	0.0433119		0.854003	0.0222294		7.70229	0.037256
	0.106003	0.0432614		0.856003	0.0222486		7.71169	0.0372501
	0.108003	0.0432106		0.858003	0.0222679		7.72108	0.0372534
	0.110003	0.0431594		0.860003	0.0222875		7.73048	0.0372662
	0.112003	0.043108		0.862003	0.0223072		7.73988	0.0372887
	0.114003	0.0430563		0.864003	0.0223271		7.74928	0.0373209
	0.116003	0.0430044		0.866003	0.0223471		7.75868	0.0373625
	0.118003	0.0429523		0.868003	0.0223674		7.76807	0.037413
	0.120003	0.0429		0.870003	0.0223878		7.77747	0.0374719
	0.122003	0.0428476		0.872003	0.0224084		7.78687	0.0375385
	0.124003	0.0427951		0.874003	0.0224292		7.79627	0.0376118
	0.126003	0.0427425		0.876003	0.0224501		7.80567	0.0376911
	0.128003	0.0426899		0.878003	0.0224711		7.81506	0.0377753
	0.130003	0.0426372		0.880003	0.0224923		7.82446	0.0378634
	0.132003	0.0425845		0.882003	0.0225137		7.83386	0.0379544
	0.134003	0.0425319		0.884003	0.0225351		7.84326	0.0380473
	0.136003	0.0424794		0.886003	0.0225567		7.85266	0.0381411
	0.138003	0.042427		0.888003	0.0225785		7.86206	0.038235
	0.140003	0.0423747		0.890003	0.0226003		7.87145	0.0383282
	0.142003	0.0423226		0.892003	0.0226223		7.88085	0.03842
	0.144003	0.0422707		0.894003	0.0226443		7.89025	0.0385098
	0.146003	0.0422191		0.896003	0.0226664		7.89965	0.0385971
	0.148003	0.0421677		0.898003	0.0226887		7.90905	0.0386816
	0.150003	0.0421166		0.900003	0.022711		7.91844	0.0387631
	0.152003	0.0420659		0.902003	0.0227334		7.92784	0.0388415
	0.154003	0.0420155		0.904003	0.0227558		7.93724	0.0389167
	0.156003	0.0419656		0.906003	0.0227784		7.94664	0.038989
	0.158003	0.0419161		0.908003	0.0228009		7.95604	0.0390584
	0.160003	0.0418671		0.910003	0.0228236		7.96543	0.0391253
	0.162003	0.0418186		0.912003	0.0228462		7.97483	0.03919
	0.164003	0.0417706		0.914003	0.0228689		7.98423	0.0392529
	0.166003	0.0417232		0.916003	0.0228916		7.99363	0.0393142
	0.168003	0.0416764		0.918003	0.0229143		8.00303	0.0393745
	0.170003	0.0416303		0.920003	0.0229371		8.01242	0.039434
	0.172003	0.0415849		0.922003	0.0229598		8.02182	0.0394932
	0.174003	0.0415401		0.924003	0.0229826		8.03122	0.0395523
	0.176003	0.0414962		0.926003	0.0230053		8.04062	0.0396117
	0.178003	0.041453		0.928003	0.023028		8.05002	0.0396715
	0.180003	0.0414106		0.930003	0.0230507		8.05941	0.039732
	0.182003	0.0413691		0.932003	0.0230733		8.06881	0.0397933
	0.184003	0.0413285		0.934003	0.0230959		8.07821	0.0398554
	0.186003	0.0412889		0.936003	0.0231184		8.08761	0.0399183
	0.188003	0.0412501		0.938003	0.0231409		8.09701	0.0399822
	0.190003	0.0412124		0.940003	0.0231633		8.1064	0.0400469
	0.192003	0.0411757		0.942003	0.0231857		8.1158	0.0401124
	0.194003	0.0411401		0.944003	0.0232079		8.1252	0.0401787
	0.196003	0.0411055		0.946003	0.0232301		8.1346	0.0402456
	0.198003	0.0410721		0.948003	0.0232522		8.144	0.0403132
	0.200003	0.0410399		0.950003	0.0232742		8.15339	0.0403814
	0.202003	0.0410088		0.952003	0.0232961		8.16279	0.0404501
	0.204003	0.040979		0.954003	0.0233178		8.17219	0.0405194
	0.206003	0.0409505		0.956003	0.0233395		8.18159	0.0405894
	0.208003	0.0409232		0.958003	0.023361		8.19099	0.0406602
	0.210003	0.0408973		0.960003	0.0233824		8.20039	0.0407318
	0.212003	0.0408728		0.962003	0.0234036		8.20978	0.0408043
	0.214003	0.0408496		0.964003	0.0234247		8.21918	0.0408781
	0.216003	0.0408279		0.966003	0.0234457		8.22858	0.0409531
	0.218003	0.0408076		0.968003	0.0234665		8.23798	0.0410297
	0.220003	0.0407888		0.970003	0.0234871		8.24738	0.0411078
	0.222003	0.0407715		0.972003	0.0235076		8.25677	0.0411877
	0.224003	0.0407558		0.974003	0.0235279		8.26617	0.0412694
	0.226003	0.0407416		0.976003	0.023548		8.27557	0.0413529
	0.228003	0.0407291		0.978003	0.0235679		8.28497	0.0414382
	0.230003	0.0407182		0.980003	0.0235877		8.29437	0.0415252
	0.232003	0.040709		0.982003	0.0236072		8.30376	0.0416135
	0.234003	0.0407014		0.984003	0.0236266		8.31316	0.041703
	0.236003	0.0406956		0.986003	0.0236457		8.32256	0.0417931
	0.238003	0.0406915		0.988003	0.0236647		8.33196	0.0418833
	0.240003	0.0406893		0.990003	0.0236834		8.34136	0.0419731
	0.242003	0.0406888		0.992003	0.023702		8.35075	0.0420617
	0.244003	0.0406901		0.994003	0.0237203		8.36015	0.0421483
	0.246003	0.0406933		0.996003	0.0237384		8.36955	0.0422322
	0.248003	0.0406984		0.998003	0.0237563		8.37895	0.0423124
	0.250003	0.0407054		1	0.023774		8.38835	0.0423881
	0.252003	0.0407143		1.002	0.0237914		8.39774	0.0424583
	0.254003	0.0407252		1.004	0.0238087		8.40714	0.0425222
	0.256003	0.040738		1.006	0.0238257		8.41654	0.042579
	0.258003	0.0407529		1.008	0.0238425		8.42594	0.0426279
	0.260003	0.0407697		1.01	0.023859		8.43534	0.0426684
	0.262003	0.0407886		1.012	0.0238754		8.44473	0.0427
	0.264003	0.0408096		1.014	0.0238915		8.45413	0.0427223
	0.266003	0.0408326		1.016	0.0239073		8.46353	0.0427352
	0.268003	0.0408577		1.018	0.023923		8.47293	0.0427386
	0.270003	0.040885		1.02	0.0239384		8.48233	0.0427329
	0.272003	0.0409144		1.022	0.0239536		8.49173	0.0427184
	0.274003	0.0409459		1.024	0.0239685		8.50112	0.0426957
	0.276004	0.0409796		1.026	0.0239833		8.51052	0.0426657
	0.278004	0.0410155		1.028	0.0239978		8.51992	0.0426292
	0.280004	0.0410535		1.03	0.0240121		8.52932	0.0425874
	0.282004	0.0410938		1.032	0.0240261		8.53871	0.0425417
	0.284004	0.0411363		1.034	0.02404		8.54811	0.0424933
	0.286004	0.041181		1.036	0.0240536		8.55751	0.0424438
	0.288004	0.041228		1.038	0.0240671		8.56691	0.0423946
	0.290004	0.0412773		1.04	0.0240803		8.57631	0.0423473
	0.292004	0.0413287		1.042	0.0240933		8.58571	0.0423034
	0.294003	0.0413825		1.044	0.0241061		8.5951	0.0422644
	0.296003	0.0414386		1.046	0.0241187		8.6045	0.0422315
	0.298003	0.0414969		1.048	0.0241311		8.6139	0.042206
	0.300003	0.0415576		1.05	0.0241433		8.6233	0.0421891
	0.302003	0.0416205		1.052	0.0241554		8.6327	0.0421816
	0.304003	0.0416858		1.054	0.0241672		8.64209	0.0421843
	0.306003	0.0417534		1.056	0.0241789		8.65149	0.0421976
	0.308003	0.0418233		1.058	0.0241904		8.66089	0.0422218
	0.310003	0.0418955		1.06	0.0242018		8.67029	0.042257
	0.312003	0.04197		1.062	0.024213		8.67969	0.0423031
	0.314003	0.0420469		1.064	0.024224		8.68908	0.0423595
	0.316003	0.042126		1.066	0.0242349		8.69848	0.0424258
	0.318003	0.0422075		1.068	0.0242456		8.70788	0.0425012
	0.320003	0.0422913		1.07	0.0242562		8.71728	0.0425847
	0.322003	0.0423775		1.072	0.0242667		8.72668	0.0426754
	0.324003	0.0424659		1.074	0.024277		8.73607	0.042772
	0.326004	0.0425567		1.076	0.0242873		8.74547	0.0428734
	0.328004	0.0426497		1.078	0.0242974		8.75487	0.0429782
	0.330004	0.042745		1.08	0.0243075		8.76427	0.0430852
	0.332004	0.0428427		1.082	0.0243174		8.77367	0.0431933
	0.334004	0.0429426		1.084	0.0243272		8.78307	0.0433011
	0.336004	0.0430448		1.086	0.024337		8.79246	0.0434077
	0.338004	0.0431492		1.088	0.0243467		8.80186	0.0435119
	0.340004	0.0432559		1.09	0.0243564		8.81126	0.0436131
	0.342004	0.0433649		1.092	0.024366		8.82066	0.0437103
	0.344004	0.043476		1.094	0.0243755		8.83005	0.0438031
	0.346004	0.0435894		1.096	0.024385		8.83945	0.043891
	0.348004	0.043705		1.098	0.0243945		8.84885	0.0439737
	0.350004	0.0438228		1.1	0.024404		8.85825	0.0440511
	0.352004	0.0439427		1.102	0.0244134		8.86765	0.0441231
	0.354004	0.0440648		1.104	0.0244229		8.87705	0.0441899
	0.356004	0.044189		1.106	0.0244323		8.88644	0.0442515
	0.358004	0.0443154		1.108	0.0244418		8.89584	0.0443084
	0.360004	0.0444438		1.11	0.0244513		8.90524	0.0443607
	0.362004	0.0445743		1.112	0.0244608		8.91464	0.0444088
	0.364004	0.0447069		1.114	0.0244703		8.92403	0.044453
	0.366004	0.0448415		1.116	0.02448		8.93343	0.0444937
	0.368004	0.0449781		1.118	0.0244896		8.94283	0.0445311
	0.370004	0.0451167		1.12	0.0244994		8.95223	0.0445655
	0.372004	0.0452572		1.122	0.0245092		8.96163	0.0445969
	0.374004	0.0453997		1.124	0.024519		8.97102	0.0446256
	0.376004	0.0455442		1.126	0.024529		8.98042	0.0446515
	0.378004	0.0456905		1.128	0.0245391		8.98982	0.0446745
	0.380004	0.0458386		1.13	0.0245493		8.99922	0.0446944
	0.382004	0.0459886		1.132	0.0245596		9.00862	0.0447111
	0.384004	0.0461404		1.134	0.02457		9.01802	0.0447243
	0.386004	0.0462939		1.136	0.0245806		9.02741	0.0447336
	0.388004	0.0464492		1.138	0.0245913		9.03681	0.0447389
	0.390004	0.0466062		1.14	0.0246022		9.04621	0.0447396
	0.392004	0.0467649		1.142	0.0246132		9.05561	0.0447357
	0.394004	0.0469252		1.144	0.0246244		9.06501	0.0447268
	0.396004	0.0470872		1.146	0.0246357		9.07441	0.0447128
	0.398004	0.0472507		1.148	0.0246472		9.0838	0.0446937
	0.400004	0.0474158		1.15	0.0246589		9.0932	0.0446696
	0.402004	0.0475823		1.152	0.0246708		9.1026	0.0446407
	0.404004	0.0477504		1.154	0.0246829		9.112	0.0446074
	0.406004	0.0479198		1.156	0.0246952		9.12139	0.0445703
	0.408004	0.0480907		1.158	0.0247077		9.13079	0.0445299
	0.410004	0.0482629		1.16	0.0247205		9.14019	0.0444873
	0.412004	0.0484365		1.162	0.0247334		9.14959	0.0444435
	0.414004	0.0486113		1.164	0.0247466		9.15899	0.0443995
	0.416004	0.0487874		1.166	0.02476		9.16839	0.0443568
	0.418004	0.0489647		1.168	0.0247737		9.17778	0.0443166
	0.420004	0.0491431		1.17	0.0247876		9.18718	0.0442805
	0.422004	0.0493227		1.172	0.0248017		9.19658	0.0442499
	0.424004	0.0495033		1.174	0.0248161		9.20598	0.0442264
	0.426004	0.049685		1.176	0.0248307		9.21537	0.0442113
	0.428004	0.0498677		1.178	0.0248456		9.22477	0.0442062
	0.430004	0.0500514		1.18	0.0248608		9.23417	0.0442121
	0.432004	0.0502359		1.182	0.0248762		9.24357	0.0442304
	0.434004	0.0504213		1.184	0.0248919		9.25297	0.044262
	0.436004	0.0506076		1.186	0.0249079		9.26237	0.0443075
	0.438004	0.0507946		1.188	0.0249241		9.27176	0.0443676
	0.440004	0.0509823		1.19	0.0249406		9.28116	0.0444424
	0.442004	0.0511708		1.192	0.0249574		9.29056	0.044532
	0.444004	0.0513599		1.194	0.0249744		9.29996	0.0446361
	0.446004	0.0515496		1.196	0.0249917		9.30936	0.0447542
	0.448004	0.0517398		1.198	0.0250093		9.31875	0.0448854
	0.450004	0.0519306		1.2	0.0250271		9.32815	0.0450287
	0.452004	0.0521218		1.202	0.0250453		9.33755	0.0451827
	0.454004	0.0523134		1.204	0.0250637		9.34695	0.0453459
	0.456004	0.0525054		1.206	0.0250823		9.35635	0.0455166
	0.458004	0.0526977		1.208	0.0251013		9.36574	0.045693
	0.460004	0.0528903		1.21	0.0251204		9.37514	0.045873
	0.462004	0.0530831		1.212	0.0251399		9.38454	0.0460547
	0.464004	0.0532761		1.214	0.0251596		9.39394	0.0462361
	0.466004	0.0534693		1.216	0.0251796		9.40334	0.046415
	0.468004	0.0536625		1.218	0.0251998		9.41273	0.0465896
	0.470004	0.0538557		1.22	0.0252202		9.42213	0.046758
	0.472004	0.054049		1.222	0.0252409		9.43153	0.0469185
	0.474004	0.0542422		1.224	0.0252618		9.44093	0.0470694
	0.476004	0.0544353		1.226	0.025283		9.45033	0.0472097
	0.478004	0.0546282		1.228	0.0253044		9.45972	0.047338
	0.480004	0.054821		1.23	0.0253259		9.46912	0.0474536
	0.482004	0.0550135		1.232	0.0253477		9.47852	0.0475559
	0.484004	0.0552057		1.234	0.0253697		9.48792	0.0476446
	0.486004	0.0553976		1.236	0.0253919		9.49732	0.0477197
	0.488004	0.0555891		1.238	0.0254143		9.50671	0.0477812
	0.490004	0.0557801		1.24	0.0254368		9.51611	0.0478298
	0.492004	0.0559707		1.242	0.0254596		9.52551	0.047866
	0.494004	0.0561608		1.244	0.0254824		9.53491	0.0478908
	0.496004	0.0563502		1.246	0.0255054		9.54431	0.0479051
	0.498004	0.0565391		1.248	0.0255286		9.55371	0.0479102
	0.500004	0.0567273		1.25	0.0255519		9.5631	0.0479073
	0.502004	0.0569148		1.252	0.0255753		9.5725	0.0478977
	0.504004	0.0571016		1.254	0.0255987		9.5819	0.0478829
	0.506004	0.0572875		1.256	0.0256223		9.5913	0.0478642
	0.508004	0.0574727		1.258	0.025646		9.6007	0.0478429
	0.510004	0.0576569		1.26	0.0256697		9.61009	0.0478203
	0.512004	0.0578402		1.262	0.0256935		9.61949	0.0477975
	0.514004	0.0580225		1.264	0.0257173		9.62889	0.0477756
	0.516004	0.0582038		1.266	0.0257412		9.63829	0.0477554
	0.518004	0.0583841		1.268	0.025765		9.64769	0.0477378
	0.520004	0.0585632		1.27	0.0257889		9.65708	0.0477232
	0.522004	0.0587413		1.272	0.0258127		9.66648	0.0477122
	0.524004	0.0589181		1.274	0.0258366		9.67588	0.0477049
	0.526004	0.0590937		1.276	0.0258603		9.68528	0.0477015
	0.528004	0.0592681		1.278	0.025884		9.69468	0.0477019
	0.530004	0.0594411		1.28	0.0259076		9.70407	0.0477059
	0.532004	0.0596129		1.282	0.0259312		9.71347	0.0477133
	0.534004	0.0597832		1.284	0.0259546		9.72287	0.0477237
	0.536004	0.0599521		1.286	0.0259779		9.73227	0.0477366
	0.538004	0.0601196		1.288	0.026001		9.74167	0.0477517
	0.540004	0.0602855		1.29	0.026024		9.75106	0.0477684
	0.542004	0.06045		1.292	0.0260468		9.76046	0.0477863
	0.544004	0.0606128		1.294	0.0260695		9.76986	0.047805
	0.546004	0.0607741		1.296	0.0260919		9.77926	0.0478242
	0.548004	0.0609338		1.298	0.026114		9.78866	0.0478436
	0.550004	0.0610917		1.3	0.026136		9.79805	0.047863
	0.552004	0.061248		1.302	0.0261576		9.80745	0.0478825
	0.554004	0.0614026		1.304	0.026179		9.81685	0.047902
	0.556004	0.0615554		1.306	0.0262001		9.82625	0.0479217
	0.558004	0.0617063		1.308	0.0262208		9.83565	0.047942
	0.560004	0.0618555		1.31	0.0262412		9.84505	0.0479632
	0.562004	0.0620028		1.312	0.0262613		9.85444	0.0479859
	0.564004	0.0621482		1.314	0.026281		9.86384	0.0480107
	0.566004	0.0622917		1.316	0.0263002		9.87324	0.0480381
	0.568004	0.0624333		1.318	0.0263191		9.88264	0.0480689
	0.570004	0.0625729		1.32	0.0263376		9.89204	0.0481038
	0.572004	0.0627105		1.322	0.0263555		9.90143	0.0481436
	0.574004	0.0628461		1.324	0.0263731		9.91083	0.0481887
	0.576004	0.0629796		1.326	0.0263901		9.92023	0.0482399
	0.578004	0.0631111		1.328	0.0264066		9.92963	0.0482977
	0.580004	0.0632405		1.33	0.0264226		9.93903	0.0483624
	0.582004	0.0633678		1.332	0.0264381		9.94842	0.0484344
	0.584004	0.063493		1.334	0.026453		9.95782	0.0485137
	0.586004	0.063616		1.336	0.0264673		9.96722	0.0486004
	0.588004	0.0637368		1.338	0.026481		9.97662	0.0486943
	0.590004	0.0638554		1.34	0.0264941		9.98602	0.048795
	0.592004	0.0639718		1.342	0.0265066		9.99541	0.0489019
	0.594004	0.064086		1.344	0.0265184		10.0048	0.0490144
	0.596004	0.064198		1.346	0.0265295		10.0142	0.0491317
	0.598004	0.0643077		1.348	0.02654		10.0236	0.0492528
	0.600004	0.0644151		1.35	0.0265498		10.033	0.0493765
	0.602004	0.0645203		1.352	0.0265588		10.0424	0.0495018
	0.604004	0.0646231		1.354	0.0265672		10.0518	0.0496273
	0.606004	0.0647236		1.356	0.0265747		10.0612	0.0497519
	0.608004	0.0648218		1.358	0.0265815		10.0706	0.0498743
	0.610004	0.0649177		1.36	0.0265876		10.08	0.0499932
	0.612004	0.0650112		1.362	0.0265928		10.0894	0.0501074
	0.614004	0.0651023		1.364	0.0265972		10.0988	0.0502161
	0.616004	0.0651911		1.366	0.0266008		10.1082	0.0503181
	0.618004	0.0652776		1.368	0.0266036		10.1176	0.0504127
	0.620004	0.0653616		1.37	0.0266055		10.127	0.0504993
	0.622004	0.0654433		1.372	0.0266066		10.1364	0.0505775
	0.624004	0.0655226		1.374	0.0266067		10.1458	0.0506469
	0.626004	0.0655995		1.376	0.026606		10.1552	0.0507077
	0.628004	0.0656739		1.378	0.0266044		10.1646	0.0507599
	0.630004	0.065746		1.38	0.0266019		10.174	0.050804
	0.632004	0.0658157		1.382	0.0265985		10.1834	0.0508405
	0.634004	0.065883		1.384	0.0265941		10.1928	0.0508701
	0.636004	0.0659479		1.386	0.0265888		10.2022	0.0508937
	0.638004	0.0660104		1.388	0.0265825		10.2116	0.0509124
	0.640004	0.0660705		1.39	0.0265753		10.221	0.0509271
	0.642004	0.0661282		1.392	0.0265672		10.2304	0.0509391
	0.644004	0.0661835		1.394	0.026558		10.2398	0.0509496
	0.646004	0.0662364		1.396	0.0265479		10.2492	0.0509596
	0.648004	0.0662869		1.398	0.0265368		10.2586	0.0509702
	0.650004	0.066335		1.4	0.0265247		10.268	0.0509826
	0.652004	0.0663808		1.402	0.0265116		10.2774	0.0509976
	0.654004	0.0664242		1.404	0.0264975		10.2868	0.0510159
	0.656004	0.0664652		1.406	0.0264825		10.2962	0.0510382
	0.658004	0.0665039		1.408	0.0264664		10.3056	0.0510647
	0.660004	0.0665402		1.41	0.0264493		10.3149	0.0510958
	0.662004	0.0665741		1.412	0.0264312		10.3243	0.0511313
	0.664004	0.0666058		1.414	0.0264121		10.3337	0.0511711
	0.666004	0.0666351		1.416	0.026392		10.3431	0.0512145
	0.668004	0.0666622		1.418	0.0263709		10.3525	0.0512611
	0.670004	0.0666869		1.42	0.0263488		10.3619	0.05131
	0.672004	0.0667093		1.422	0.0263257		10.3713	0.0513601
	0.674004	0.0667295		1.424	0.0263016		10.3807	0.0514103
	0.676004	0.0667474		1.426	0.0262765		10.3901	0.0514595
	0.678004	0.0667631		1.428	0.0262504		10.3995	0.0515063
	0.680004	0.0667765		1.43	0.0262233		10.4089	0.0515495
	0.682004	0.0667878		1.432	0.0261953		10.4183	0.0515878
	0.684004	0.0667968		1.434	0.0261663		10.4277	0.05162
	0.686004	0.0668037		1.436	0.0261363		10.4371	0.051645
	0.688004	0.0668084		1.438	0.0261054		10.4465	0.0516619
	0.690004	0.0668109		1.44	0.0260735		10.4559	0.0516699
	0.692004	0.0668113		1.442	0.0260407		10.4653	0.0516685
	0.694004	0.0668096		1.444	0.026007		10.4747	0.0516574
	0.696004	0.0668058		1.446	0.0259724		10.4841	0.0516363
	0.698004	0.0667999		1.448	0.0259369		10.4935	0.0516056
	0.700004	0.066792		1.45	0.0259005		10.5029	0.0515656
	0.702004	0.0667821		1.452	0.0258632		10.5123	0.0515171
	0.704004	0.0667701		1.454	0.0258251		10.5217	0.051461
	0.706004	0.0667562		1.456	0.0257861		10.5311	0.0513985
	0.708004	0.0667403		1.458	0.0257463		10.5405	0.051331
	0.710004	0.0667224		1.46	0.0257057		10.5499	0.0512599
	0.712004	0.0667026		1.462	0.0256644		10.5593	0.051187
	0.714004	0.0666809		1.464	0.0256222		10.5687	0.0511141
	0.716004	0.0666573		1.466	0.0255793		10.5781	0.051043
	0.718004	0.0666318		1.468	0.0255357		10.5875	0.0509755
	0.720004	0.0666045		1.47	0.0254914		10.5969	0.0509136
	0.722004	0.0665754		1.472	0.0254465		10.6063	0.0508588
	0.724004	0.0665446		1.474	0.0254008		10.6157	0.0508127
	0.726004	0.0665119		1.476	0.0253545		10.6251	0.050777
	0.728004	0.0664775		1.478	0.0253077		10.6345	0.0507527
	0.730004	0.0664414		1.48	0.0252602		10.6439	0.050741
	0.732004	0.0664036		1.482	0.0252122		10.6533	0.0507425
	0.734004	0.0663642		1.484	0.0251636		10.6627	0.0507579
	0.736004	0.0663231		1.486	0.0251146		10.6721	0.0507874
	0.738004	0.0662803		1.488	0.025065		10.6815	0.0508309
	0.740004	0.066236		1.49	0.025015		10.6909	0.0508882
	0.742004	0.0661901		1.492	0.0249647		10.7003	0.0509587
	0.744004	0.0661427		1.494	0.0249139		10.7097	0.0510417
	0.746004	0.0660938		1.496	0.0248627		10.7191	0.0511361
	0.748004	0.0660434		1.498	0.0248113		10.7285	0.0512408
	0.750004	0.0659915		1.5	0.0247595		10.7379	0.0513545
	0.752004	0.0659382		1.502	0.0247075		10.7473	0.0514758
	0.754004	0.0658835		1.504	0.0246553		10.7567	0.0516032
	0.756004	0.0658274		1.506	0.0246029		10.7661	0.0517352
	0.758004	0.0657699		1.508	0.0245503		10.7755	0.0518702
	0.760004	0.0657111		1.51	0.0244976		10.7849	0.0520069
	0.762004	0.0656511		1.512	0.0244448		10.7942	0.0521438
	0.764004	0.0655897		1.514	0.024392		10.8036	0.0522797
	0.766004	0.0655271		1.516	0.0243392		10.813	0.0524135
	0.768004	0.0654632		1.518	0.0242863		10.8224	0.0525442
	0.770004	0.0653982		1.52	0.0242336		10.8318	0.052671
	0.772004	0.065332		1.522	0.0241809		10.8412	0.0527932
	0.774004	0.0652646		1.524	0.0241284		10.8506	0.0529105
	0.776004	0.0651961		1.526	0.0240761		10.86	0.0530226
	0.778004	0.0651266		1.528	0.0240239		10.8694	0.0531295
	0.780004	0.0650559		1.53	0.0239721		10.8788	0.0532311
	0.782004	0.0649842		1.532	0.0239205		10.8882	0.0533277
	0.784004	0.0649115		1.534	0.0238693		10.8976	0.0534197
	0.786004	0.0648379		1.536	0.0238184		10.907	0.0535074
	0.788004	0.0647632		1.538	0.023768		10.9164	0.0535914
	0.790004	0.0646876		1.54	0.023718		10.9258	0.0536721
	0.792005	0.0646111		1.542	0.0236685		10.9352	0.05375
	0.794005	0.0645337		1.544	0.0236196		10.9446	0.0538258
	0.796005	0.0644554		1.546	0.0235712		10.954	0.0538998
	0.798005	0.0643764		1.548	0.0235235		10.9634	0.0539726
	0.800005	0.0642964		1.55	0.0234764		10.9728	0.0540443
	0.802005	0.0642157		1.552	0.0234301		10.9822	0.0541153
	0.804005	0.0641343		1.554	0.0233845		10.9916	0.0541856
	0.806005	0.0640521		1.556	0.0233397		11.001	0.0542555
	0.808005	0.0639691		1.558	0.0232957		11.0104	0.0543248
	0.810005	0.0638855		1.56	0.0232526		11.0198	0.0543933
	0.812005	0.0638012		1.562	0.0232104		11.0292	0.0544609
	0.814005	0.0637163		1.564	0.0231692		11.0386	0.0545273
	0.816005	0.0636307		1.566	0.023129		11.048	0.0545921
	0.818005	0.0635446		1.568	0.0230898		11.0574	0.054655
	0.820005	0.0634578		1.57	0.0230517		11.0668	0.0547155
	0.822005	0.0633705		1.572	0.0230148		11.0762	0.0547734
	0.824005	0.0632827		1.574	0.022979		11.0856	0.0548283
	0.826005	0.0631944		1.576	0.0229444		11.095	0.0548799
	0.828005	0.0631055		1.578	0.0229111		11.1044	0.0549281
	0.830005	0.0630162		1.58	0.022879		11.1138	0.0549727
	0.832005	0.0629265		1.582	0.0228483		11.1232	0.0550136
	0.834005	0.0628363		1.584	0.022819		11.1326	0.0550511
	0.836005	0.0627457		1.586	0.0227911		11.142	0.0550853
	0.838005	0.0626548		1.588	0.0227646		11.1514	0.0551166
	0.840005	0.0625634		1.59	0.0227396		11.1608	0.0551453
	0.842005	0.0624717		1.592	0.0227162		11.1702	0.055172
	0.844005	0.0623797		1.594	0.0226943		11.1796	0.0551974
	0.846005	0.0622874		1.596	0.022674		11.189	0.055222
	0.848005	0.0621948		1.598	0.0226553		11.1984	0.0552467
	0.850005	0.062102		1.6	0.0226383		11.2078	0.0552721
	0.852005	0.0620089		1.602	0.022623		11.2172	0.0552991
	0.854005	0.0619155		1.604	0.0226095		11.2266	0.0553284
	0.856005	0.061822		1.606	0.0225977		11.236	0.0553607
	0.858005	0.0617282		1.608	0.0225878		11.2454	0.0553965
	0.860005	0.0616343		1.61	0.0225797		11.2548	0.0554365
	0.862005	0.0615402		1.612	0.0225735		11.2642	0.055481
	0.864005	0.061446		1.614	0.0225692		11.2735	0.0555303
	0.866005	0.0613516		1.616	0.0225668		11.2829	0.0555847
	0.868005	0.0612572		1.618	0.0225664		11.2923	0.0556441
	0.870005	0.0611626		1.62	0.022568		11.3017	0.0557085
	0.872005	0.061068		1.622	0.0225716		11.3111	0.0557775
	0.874005	0.0609733		1.624	0.0225772		11.3205	0.0558508
	0.876005	0.0608786		1.626	0.022585		11.3299	0.0559278
	0.878005	0.0607838		1.628	0.0225948		11.3393	0.0560081
	0.880005	0.060689		1.63	0.0226068		11.3487	0.0560907
	0.882005	0.0605942		1.632	0.022621		11.3581	0.0561751
	0.884005	0.0604995		1.634	0.0226373		11.3675	0.0562604
	0.886005	0.0604048		1.636	0.0226558		11.3769	0.0563458
	0.888005	0.0603101		1.638	0.0226765		11.3863	0.0564304
	0.890005	0.0602155		1.64	0.0226995		11.3957	0.0565136
	0.892005	0.0601209		1.642	0.0227247		11.4051	0.0565946
	0.894005	0.0600265		1.644	0.0227522		11.4145	0.0566729
	0.896005	0.0599321		1.646	0.022782		11.4239	0.0567479
	0.898005	0.0598379		1.648	0.0228141		11.4333	0.0568193
	0.900005	0.0597438		1.65	0.0228485		11.4427	0.0568868
	0.902005	0.0596498		1.652	0.0228853		11.4521	0.0569503
	0.904005	0.059556		1.654	0.0229244		11.4615	0.0570099
	0.906005	0.0594624		1.656	0.0229658		11.4709	0.0570658
	0.908005	0.059369		1.658	0.0230096		11.4803	0.0571183
	0.910005	0.0592757		1.66	0.0230558		11.4897	0.0571678
	0.912005	0.0591827		1.662	0.0231044		11.4991	0.0572151
	0.914005	0.0590898		1.664	0.0231553		11.5085	0.0572607
	0.916005	0.0589973		1.666	0.0232087		11.5179	0.0573054
	0.918005	0.0589049		1.668	0.0232644		11.5273	0.05735
	0.920005	0.0588128		1.67	0.0233226		11.5367	0.0573954
	0.922005	0.058721		1.672	0.0233831		11.5461	0.0574424
	0.924005	0.0586295		1.674	0.023446		11.5555	0.0574918
	0.926005	0.0585382		1.676	0.0235114		11.5649	0.0575444
	0.928005	0.0584473		1.678	0.0235791		11.5743	0.0576008
	0.930005	0.0583567		1.68	0.0236492		11.5837	0.0576617
	0.932005	0.0582664		1.682	0.0237217		11.5931	0.0577275
	0.934005	0.0581765		1.684	0.0237965		11.6025	0.0577986
	0.936005	0.0580869		1.686	0.0238738		11.6119	0.0578753
	0.938005	0.0579976		1.688	0.0239533		11.6213	0.0579575
	0.940005	0.0579088		1.69	0.0240353		11.6307	0.0580451
	0.942005	0.0578203		1.692	0.0241195		11.6401	0.058138
	0.944005	0.0577323		1.694	0.0242061		11.6495	0.0582358
	0.946005	0.0576446		1.696	0.024295		11.6589	0.0583379
	0.948005	0.0575574		1.698	0.0243862		11.6683	0.0584437
	0.950005	0.0574706		1.7	0.0244796		11.6777	0.0585524
	0.952005	0.0573843		1.702	0.0245753		11.6871	0.0586631
	0.954005	0.0572984		1.704	0.0246733		11.6965	0.058775
	0.956005	0.057213		1.706	0.0247734		11.7059	0.058887
	0.958005	0.057128		1.708	0.0248757		11.7153	0.0589982
	0.960005	0.0570436		1.71	0.0249802		11.7247	0.0591074
	0.962005	0.0569597		1.712	0.0250869		11.7341	0.0592138
	0.964005	0.0568763		1.714	0.0251956		11.7435	0.0593163
	0.966005	0.0567934		1.716	0.0253064		11.7529	0.059414
	0.968005	0.056711		1.718	0.0254193		11.7622	0.059506
	0.970005	0.0566292		1.72	0.0255342		11.7716	0.0595916
	0.972005	0.056548		1.722	0.0256511		11.781	0.0596702
	0.974005	0.0564674		1.724	0.0257699		11.7904	0.0597412
	0.976005	0.0563873		1.72601	0.0258906		11.7998	0.0598042
	0.978005	0.0563078		1.728	0.0260133		11.8092	0.0598589
	0.980005	0.056229		1.73	0.0261378		11.8186	0.0599051
	0.982005	0.0561508		1.732	0.0262641		11.828	0.0599429
	0.984005	0.0560732		1.734	0.0263921		11.8374	0.0599723
	0.986005	0.0559963		1.73601	0.0265219		11.8468	0.0599937
	0.988005	0.0559201		1.738	0.0266534		11.8562	0.0600074
	0.990005	0.0558445		1.74	0.0267865		11.8656	0.0600138
	0.992005	0.0557696		1.742	0.0269213		11.875	0.0600137
	0.994005	0.0556955		1.744	0.0270575		11.8844	0.0600077
	0.996005	0.055622		1.746	0.0271953		11.8938	0.0599967
	0.998005	0.0555493		1.748	0.0273346		11.9032	0.0599815
	1	0.0554773		1.75	0.0274752		11.9126	0.0599632
	1.002	0.0554061		1.752	0.0276173		11.922	0.0599427
	1.00401	0.0553357		1.75401	0.0277606		11.9314	0.0599212
	1.006	0.0552661		1.756	0.0279052		11.9408	0.0598998
	1.008	0.0551972		1.758	0.028051		11.9502	0.0598796
	1.01	0.0551292		1.76	0.0281979		11.9596	0.0598618
	1.012	0.0550621		1.762	0.028346		11.969	0.0598475
	1.01401	0.0549957		1.76401	0.0284951		11.9784	0.059838
	1.016	0.0549303		1.766	0.0286452		11.9878	0.0598342
	1.018	0.0548657		1.768	0.0287962		11.9972	0.0598374
	1.02	0.054802		1.77	0.0289481		12.0066	0.0598485
	1.022	0.0547392		1.772	0.0291008		12.016	0.0598685
	1.024	0.0546773		1.774	0.0292543		12.0254	0.0598982
	1.02601	0.0546164		1.77601	0.0294085		12.0348	0.0599385
	1.02801	0.0545564		1.77801	0.0295633		12.0442	0.05999
	1.03001	0.0544975		1.78001	0.0297186		12.0536	0.0600532
	1.03201	0.0544394		1.78201	0.0298745		12.063	0.0601286
	1.03401	0.0543824		1.78401	0.0300309		12.0724	0.0602165
	1.03601	0.0543265		1.78601	0.0301876		12.0818	0.0603169
	1.03801	0.0542715		1.78801	0.0303446		12.0912	0.0604299
	1.04001	0.0542176		1.79001	0.0305019		12.1006	0.0605552
	1.04201	0.0541648		1.79201	0.0306594		12.11	0.0606925
	1.04401	0.0541131		1.79401	0.0308171		12.1194	0.0608412
	1.04601	0.0540625		1.79601	0.0309747		12.1288	0.0610005
	1.04801	0.054013		1.79801	0.0311324		12.1382	0.0611697
	1.05001	0.0539646		1.80001	0.03129		12.1476	0.0613476
	1.05201	0.0539174		1.80201	0.0314475		12.157	0.0615331
	1.05401	0.0538714		1.80401	0.0316048		12.1664	0.0617247
	1.05601	0.0538265		1.80601	0.0317618		12.1758	0.0619212
	1.05801	0.0537829		1.80801	0.0319185		12.1852	0.0621209
	1.06001	0.0537405		1.81001	0.0320747		12.1946	0.0623222
	1.06201	0.0536993		1.81201	0.0322305		12.204	0.0625234
	1.06401	0.0536594		1.81401	0.0323857		12.2134	0.0627228
	1.06601	0.0536208		1.81601	0.0325404		12.2228	0.0629187
	1.06801	0.0535835		1.81801	0.0326943		12.2322	0.0631094
	1.07001	0.0535475		1.82001	0.0328475		12.2415	0.0632933
	1.07201	0.0535128		1.82201	0.0329999		12.2509	0.0634689
	1.07401	0.0534795		1.82401	0.0331515		12.2603	0.0636347
	1.07601	0.0534476		1.82601	0.033302		12.2697	0.0637894
	1.07801	0.053417		1.82801	0.0334516		12.2791	0.0639319
	1.08001	0.0533878		1.83001	0.0336001		12.2885	0.0640613
	1.08201	0.0533601		1.83201	0.0337474		12.2979	0.0641769
	1.08401	0.0533338		1.83401	0.0338935		12.3073	0.0642781
	1.08601	0.053309		1.83601	0.0340384		12.3167	0.0643647
	1.08801	0.0532857		1.83801	0.0341818		12.3261	0.0644366
	1.09001	0.0532638		1.84001	0.0343239		12.3355	0.0644942
	1.09201	0.0532435		1.84201	0.0344645		12.3449	0.0645377
	1.09401	0.0532247		1.84401	0.0346035		12.3543	0.0645679
	1.09601	0.0532074		1.84601	0.034741		12.3637	0.0645859
	1.098	0.0531918		1.848	0.0348767		12.3731	0.0645925
	1.10001	0.0531777		1.85001	0.0350108		12.3825	0.0645893
	1.10201	0.0531652		1.85201	0.035143		12.3919	0.0645778
	1.10401	0.0531543		1.85401	0.0352734		12.4013	0.0645595
	1.10601	0.0531451		1.85601	0.0354018		12.4107	0.0645363
	1.108	0.0531375		1.858	0.0355283		12.4201	0.0645101
	1.11001	0.0531316		1.86001	0.0356527		12.4295	0.0644828
	1.11201	0.0531274		1.86201	0.0357751		12.4389	0.0644565
	1.11401	0.0531249		1.86401	0.0358952		12.4483	0.0644331
	1.11601	0.0531241		1.86601	0.0360132		12.4577	0.0644146
	1.11801	0.0531251		1.86801	0.0361289		12.4671	0.0644029
	1.12001	0.0531278		1.87001	0.0362422		12.4765	0.0643998
	1.12201	0.0531323		1.87201	0.0363532		12.4859	0.064407
	1.12401	0.0531386		1.87401	0.0364618		12.4953	0.0644261
	1.12601	0.0531466		1.87601	0.0365678		12.5047	0.0644585
	1.12801	0.0531565		1.87801	0.0366713		12.5141	0.0645053
	1.13001	0.0531683		1.88001	0.0367722		12.5235	0.0645676
	1.13201	0.0531818		1.88201	0.0368705		12.5329	0.064646
	1.13401	0.0531973		1.88401	0.0369661		12.5423	0.0647411
	1.13601	0.0532146		1.88601	0.0370589		12.5517	0.0648533
	1.13801	0.0532338		1.88801	0.037149		12.5611	0.0649823
	1.14001	0.0532548		1.89001	0.0372362		12.5705	0.0651281
	1.14201	0.0532779		1.89201	0.0373205		12.5799	0.0652901
	1.14401	0.0533028		1.89401	0.037402		12.5893	0.0654675
	1.14601	0.0533297		1.89601	0.0374805		12.5987	0.0656593
	1.14801	0.0533585		1.89801	0.037556		12.6081	0.0658642
	1.15001	0.0533893		1.90001	0.0376284		12.6175	0.0660808
	1.15201	0.0534221		1.90201	0.0376978		12.6269	0.0663073
	1.15401	0.0534568		1.90401	0.0377641		12.6363	0.0665417
	1.15601	0.0534936		1.90601	0.0378272		12.6457	0.0667821
	1.15801	0.0535323		1.90801	0.0378872		12.6551	0.0670262
	1.16001	0.0535731		1.91001	0.0379439		12.6645	0.0672717
	1.16201	0.0536159		1.91201	0.0379974		12.6739	0.067516
	1.16401	0.0536607		1.91401	0.0380477		12.6833	0.0677568
	1.16601	0.0537075		1.91601	0.0380947		12.6927	0.0679914
	1.16801	0.0537564		1.91801	0.0381383		12.7021	0.0682174
	1.17001	0.0538074		1.92001	0.0381786		12.7115	0.0684322
	1.17201	0.0538604		1.92201	0.0382155		12.7209	0.0686336
	1.17401	0.0539154		1.92401	0.0382491		12.7302	0.0688191
	1.17601	0.0539726		1.92601	0.0382792		12.7396	0.0689868
	1.17801	0.0540318		1.92801	0.0383059		12.749	0.0691345
	1.18001	0.0540931		1.93001	0.0383292		12.7584	0.0692607
	1.18201	0.0541565		1.93201	0.0383491		12.7678	0.0693639
	1.18401	0.0542219		1.93401	0.0383654		12.7772	0.069443
	1.18601	0.0542895		1.93601	0.0383783		12.7866	0.069497
	1.18801	0.0543591		1.93801	0.0383877		12.796	0.0695255
	1.19001	0.0544308		1.94001	0.0383936		12.8054	0.0695284
	1.19201	0.0545046		1.94201	0.038396		12.8148	0.0695058
	1.19401	0.0545805		1.94401	0.0383949		12.8242	0.0694584
	1.19601	0.0546585		1.94601	0.0383902		12.8336	0.0693871
	1.19801	0.0547386		1.94801	0.0383821		12.843	0.0692934
	1.20001	0.0548207		1.95001	0.0383705		12.8524	0.0691789
	1.20201	0.0549049		1.95201	0.0383553		12.8618	0.0690458
	1.20401	0.0549912		1.95401	0.0383366		12.8712	0.0688964
	1.20601	0.0550796		1.95601	0.0383145		12.8806	0.0687335
	1.20801	0.05517		1.95801	0.0382888		12.89	0.0685599
	1.21001	0.0552625		1.96001	0.0382597		12.8994	0.068379
	1.21201	0.0553571		1.96201	0.038227		12.9088	0.0681939
	1.21401	0.0554537		1.96401	0.038191		12.9182	0.0680083
	1.21601	0.0555523		1.96601	0.0381514		12.9276	0.0678255
	1.21801	0.055653		1.96801	0.0381085		12.937	0.0676492
	1.22001	0.0557557		1.97001	0.0380621		12.9464	0.0674828
	1.22201	0.0558604		1.97201	0.0380123		12.9558	0.0673296
	1.22401	0.0559671		1.97401	0.0379591		12.9652	0.067193
	1.22601	0.0560757		1.97601	0.0379026		12.9746	0.0670757
	1.22801	0.0561864		1.97801	0.0378427		12.984	0.0669806
	1.23001	0.056299		1.98001	0.0377795		12.9934	0.0669101
	1.23201	0.0564136		1.98201	0.0377131		13.0028	0.066866
	1.23401	0.0565301		1.98401	0.0376434		13.0122	0.0668502
	1.23601	0.0566485		1.98601	0.0375704		13.0216	0.0668637
	1.23801	0.0567688		1.98801	0.0374943		13.031	0.0669074
	1.24001	0.056891		1.99001	0.037415		13.0404	0.0669814
	1.24201	0.057015		1.99201	0.0373325		13.0498	0.0670858
	1.24401	0.0571409		1.99401	0.037247		13.0592	0.0672199
	1.24601	0.0572686		1.99601	0.0371585		13.0686	0.0673826
	1.24801	0.0573982		1.99801	0.0370668		13.078	0.0675725
	1.25001	0.0575295		2.00001	0.0369723		13.0874	0.0677878
	1.25201	0.0576625		2.00201	0.0368748		13.0968	0.0680264
	1.25401	0.0577974		2.00401	0.0367744		13.1062	0.0682857
	1.25601	0.0579339		2.00601	0.0366711		13.1156	0.0685631
	1.25801	0.0580721		2.00801	0.0365651		13.125	0.0688556
	1.26001	0.058212		2.01001	0.0364563		13.1344	0.0691604
	1.26201	0.0583536		2.01201	0.0363447		13.1438	0.0694741
	1.26401	0.0584967		2.01401	0.0362306		13.1532	0.0697938
	1.26601	0.0586414		2.01601	0.0361138		13.1626	0.0701163
	1.26801	0.0587877		2.01801	0.0359945		13.172	0.0704386
	1.27001	0.0589356		2.02001	0.0358726		13.1814	0.0707578
	1.27201	0.0590849		2.02201	0.0357483		13.1908	0.0710713
	1.27401	0.0592357		2.02401	0.0356216		13.2002	0.0713767
	1.27601	0.059388		2.02601	0.0354926		13.2095	0.0716717
	1.27801	0.0595416		2.02801	0.0353613		13.2189	0.0719544
	1.28001	0.0596967		2.03001	0.0352278		13.2283	0.0722233
	1.28201	0.0598531		2.03201	0.0350921		13.2377	0.0724771
	1.28401	0.0600108		2.03401	0.0349544		13.2471	0.0727149
	1.28601	0.0601697		2.03601	0.0348145		13.2565	0.0729361
	1.28801	0.0603299		2.03801	0.0346728		13.2659	0.0731404
	1.29001	0.0604914		2.04001	0.034529		13.2753	0.0733278
	1.29201	0.0606539		2.04201	0.0343835		13.2847	0.0734987
	1.29401	0.0608177		2.04401	0.0342362		13.2941	0.0736536
	1.29601	0.0609825		2.04601	0.0340871		13.3035	0.0737933
	1.29801	0.0611484		2.04801	0.0339364		13.3129	0.0739187
	1.30001	0.0613153		2.05001	0.0337841		13.3223	0.0740311
	1.30201	0.0614831		2.05201	0.0336303		13.3317	0.0741317
	1.30401	0.0616519		2.05401	0.0334751		13.3411	0.074222
	1.30601	0.0618216		2.05601	0.0333185		13.3505	0.0743032
	1.30801	0.0619922		2.05801	0.0331606		13.3599	0.0743768
	1.31001	0.0621636		2.06001	0.0330014		13.3693	0.0744444
	1.31201	0.0623358		2.06201	0.0328411		13.3787	0.0745072
	1.31401	0.0625086		2.06401	0.0326796		13.3881	0.0745666
	1.31601	0.0626822		2.06601	0.0325172		13.3975	0.0746239
	1.31801	0.0628564		2.06801	0.0323538		13.4069	0.0746803
	1.32001	0.0630313		2.07001	0.0321895		13.4163	0.0747367
	1.32201	0.0632066		2.07201	0.0320245		13.4257	0.0747941
	1.32401	0.0633825		2.07401	0.0318587		13.4351	0.0748534
	1.32601	0.0635589		2.07601	0.0316922		13.4445	0.0749153
	1.32801	0.0637356		2.07801	0.0315252		13.4539	0.0749803
	1.33001	0.0639128		2.08001	0.0313576		13.4633	0.0750492
	1.33201	0.0640902		2.08201	0.0311896		13.4727	0.0751222
	1.33401	0.064268		2.08401	0.0310212		13.4821	0.0751997
	1.33601	0.0644459		2.08601	0.0308526		13.4915	0.0752821
	1.33801	0.0646241		2.08801	0.0306837		13.5009	0.0753696
	1.34001	0.0648024		2.09001	0.0305147		13.5103	0.0754625
	1.34201	0.0649807		2.09201	0.0303457		13.5197	0.075561
	1.34401	0.0651591		2.09401	0.0301766		13.5291	0.0756652
	1.34601	0.0653375		2.09601	0.0300076		13.5385	0.0757754
	1.34801	0.0655159		2.09801	0.0298388		13.5479	0.0758918
	1.35001	0.0656941		2.10001	0.0296702		13.5573	0.0760146
	1.35201	0.0658722		2.10201	0.0295019		13.5667	0.0761441
	1.35401	0.06605		2.10401	0.0293339		13.5761	0.0762804
	1.35601	0.0662276		2.10601	0.0291664		13.5855	0.0764239
	1.35801	0.0664049		2.10801	0.0289994		13.5949	0.0765748
	1.36001	0.0665819		2.11001	0.028833		13.6043	0.0767332
	1.36201	0.0667584		2.11201	0.0286673		13.6137	0.0768993
	1.36401	0.0669345		2.11401	0.0285023		13.6231	0.0770734
	1.36601	0.06711		2.11601	0.0283381		13.6325	0.0772554
	1.36801	0.067285		2.11801	0.0281747		13.6419	0.0774453
	1.37001	0.0674594		2.12001	0.0280123		13.6513	0.0776432
	1.37201	0.0676331		2.12201	0.0278509		13.6607	0.0778488
	1.37401	0.0678062		2.12401	0.0276905		13.6701	0.0780618
	1.37601	0.0679784		2.12601	0.0275313		13.6795	0.0782818
	1.37801	0.0681499		2.12801	0.0273733		13.6888	0.0785082
	1.38001	0.0683204		2.13001	0.0272166		13.6982	0.0787405
	1.38201	0.0684901		2.13201	0.0270611		13.7076	0.0789778
	1.38401	0.0686588		2.13401	0.0269071		13.717	0.0792192
	1.38601	0.0688265		2.13601	0.0267546		13.7264	0.0794637
	1.38801	0.0689932		2.13801	0.0266035		13.7358	0.0797102
	1.39001	0.0691587		2.14001	0.0264541		13.7452	0.0799574
	1.39201	0.0693231		2.14201	0.0263062		13.7546	0.0802041
	1.39401	0.0694863		2.14401	0.0261601		13.764	0.0804491
	1.39601	0.0696482		2.14601	0.0260157		13.7734	0.0806909
	1.39801	0.0698088		2.14801	0.0258732		13.7828	0.0809284
	1.40001	0.0699681		2.15001	0.0257325		13.7922	0.0811603
	1.40201	0.0701259		2.15201	0.0255937		13.8016	0.0813854
	1.40401	0.0702824		2.15401	0.0254569		13.811	0.0816028
	1.40601	0.0704373		2.15601	0.0253221		13.8204	0.0818114
	1.40801	0.0705907		2.15801	0.0251894		13.8298	0.0820106
	1.41001	0.0707425		2.16001	0.0250588		13.8392	0.0821999
	1.41201	0.0708927		2.16201	0.0249304		13.8486	0.0823788
	1.41401	0.0710411		2.16401	0.0248043		13.858	0.0825472
	1.41601	0.0711879		2.16601	0.0246804		13.8674	0.0827052
	1.41801	0.0713329		2.16801	0.0245588		13.8768	0.0828533
	1.42001	0.0714761		2.17001	0.0244395		13.8862	0.0829918
	1.42201	0.0716175		2.17201	0.0243227		13.8956	0.0831217
	1.42401	0.0717569		2.17401	0.0242083		13.905	0.0832438
	1.42601	0.0718945		2.17601	0.0240963		13.9144	0.0833593
	1.42801	0.07203		2.17801	0.0239869		13.9238	0.0834696
	1.43001	0.0721635		2.18001	0.0238801		13.9332	0.083576
	1.43201	0.072295		2.18201	0.0237758		13.9426	0.0836801
	1.43401	0.0724244		2.18401	0.0236741		13.952	0.0837834
	1.43601	0.0725516		2.18601	0.0235751		13.9614	0.0838874
	1.43801	0.0726767		2.18801	0.0234788		13.9708	0.0839937
	1.44001	0.0727995		2.19001	0.0233852		13.9802	0.0841037
	1.44201	0.0729201		2.19201	0.0232943		13.9896	0.0842186
	1.44401	0.0730384		2.19401	0.0232062		13.999	0.0843395
	1.44601	0.0731544		2.19601	0.0231209		14.0084	0.0844674
	1.44801	0.073268		2.19801	0.0230383		14.0178	0.0846028
	1.45001	0.0733793		2.20001	0.0229587		14.0272	0.0847461
	1.45201	0.0734881		2.20201	0.0228818		14.0366	0.0848974
	1.45401	0.0735945		2.20401	0.0228079		14.046	0.0850565
	1.45601	0.0736984		2.20601	0.0227368		14.0554	0.0852227
	1.45801	0.0737997		2.20801	0.0226687		14.0648	0.0853953
	1.46001	0.0738985		2.21001	0.0226034		14.0742	0.085573
	1.46201	0.0739948		2.21201	0.0225411		14.0836	0.0857545
	1.46401	0.0740884		2.21401	0.0224817		14.093	0.0859381
	1.46601	0.0741795		2.21601	0.0224253		14.1024	0.0861219
	1.46801	0.0742678		2.21801	0.0223718		14.1118	0.0863039
	1.47001	0.0743535		2.22001	0.0223213		14.1212	0.086482
	1.47201	0.0744365		2.22201	0.0222738		14.1306	0.086654
	1.47401	0.0745167		2.22401	0.0222292		14.14	0.0868178
	1.47601	0.0745942		2.22601	0.0221876		14.1494	0.0869712
	1.47801	0.0746689		2.22801	0.022149		14.1588	0.0871124
	1.48001	0.0747408		2.23001	0.0221133		14.1682	0.0872396
	1.48201	0.07481		2.23201	0.0220806		14.1775	0.0873513
	1.48401	0.0748763		2.23401	0.0220509		14.1869	0.0874463
	1.48601	0.0749397		2.23601	0.0220241		14.1963	0.0875239
	1.48801	0.0750003		2.23801	0.0220003		14.2057	0.0875835
	1.49001	0.0750579		2.24001	0.0219794		14.2151	0.0876253
	1.49201	0.0751127		2.24201	0.0219614		14.2245	0.0876497
	1.49401	0.0751646		2.24401	0.0219464		14.2339	0.0876575
	1.49601	0.0752136		2.24601	0.0219342		14.2433	0.0876501
	1.49801	0.0752596		2.24801	0.0219249		14.2527	0.0876294
	1.50001	0.0753027		2.25001	0.0219185		14.2621	0.0875973
	1.50201	0.0753429		2.25201	0.021915		14.2715	0.0875566
	1.50401	0.07538		2.25401	0.0219142		14.2809	0.0875099
	1.50601	0.0754143		2.25601	0.0219163		14.2903	0.0874606
	1.50801	0.0754455		2.25801	0.0219212		14.2997	0.0874117
	1.51001	0.0754738		2.26001	0.0219288		14.3091	0.0873667
	1.51201	0.075499		2.26201	0.0219392		14.3185	0.087329
	1.51401	0.0755213		2.26401	0.0219523		14.3279	0.087302
	1.51601	0.0755406		2.26601	0.021968		14.3373	0.0872889
	1.51801	0.0755569		2.26801	0.0219865		14.3467	0.0872925
	1.52001	0.0755703		2.27001	0.0220075		14.3561	0.0873158
	1.52201	0.0755806		2.27201	0.0220312		14.3655	0.0873608
	1.52401	0.0755879		2.27401	0.0220574		14.3749	0.0874295
	1.52601	0.0755923		2.27601	0.0220861		14.3843	0.0875232
	1.52801	0.0755937		2.27801	0.0221173		14.3937	0.0876427
	1.53001	0.0755921		2.28001	0.022151		14.4031	0.0877882
	1.53201	0.0755876		2.28201	0.0221871		14.4125	0.0879593
	1.53401	0.07558		2.28401	0.0222256		14.4219	0.0881549
	1.53601	0.0755696		2.28601	0.0222664		14.4313	0.0883734
	1.53801	0.0755562		2.28801	0.0223095		14.4407	0.0886125
	1.54001	0.0755399		2.29001	0.0223549		14.4501	0.0888696
	1.54201	0.0755206		2.29201	0.0224025		14.4595	0.0891412
	1.54401	0.0754985		2.29401	0.0224523		14.4689	0.0894237
	1.54601	0.0754735		2.29601	0.0225042		14.4783	0.089713
	1.54801	0.0754456		2.29801	0.0225582		14.4877	0.0900047
	1.55001	0.0754148		2.30001	0.0226143		14.4971	0.0902941
	1.55201	0.0753811		2.30201	0.0226723		14.5065	0.0905766
	1.55401	0.0753447		2.30401	0.0227323		14.5159	0.0908474
	1.55601	0.0753055		2.30601	0.0227941		14.5253	0.091102
	1.55801	0.0752634		2.30801	0.0228579		14.5347	0.091336
	1.56001	0.0752186		2.31001	0.0229234		14.5441	0.0915452
	1.56201	0.0751711		2.31201	0.0229906		14.5535	0.0917258
	1.56401	0.0751208		2.31401	0.0230596		14.5629	0.0918746
	1.56601	0.0750679		2.31601	0.0231302		14.5723	0.0919889
	1.56801	0.0750122		2.31801	0.0232024		14.5817	0.0920664
	1.57001	0.0749539		2.32001	0.0232762		14.5911	0.0921056
	1.57201	0.074893		2.32201	0.0233514		14.6005	0.0921058
	1.57401	0.0748295		2.32401	0.023428		14.6099	0.0920668
	1.57601	0.0747634		2.32601	0.0235061		14.6193	0.0919892
	1.57801	0.0746948		2.32801	0.0235854		14.6287	0.0918743
	1.58001	0.0746237		2.33001	0.0236661		14.6381	0.0917243
	1.58201	0.0745501		2.33201	0.0237479		14.6474	0.0915417
	1.58401	0.0744741		2.33401	0.0238309		14.6568	0.0913298
	1.58601	0.0743956		2.33601	0.023915		14.6662	0.0910927
	1.58801	0.0743148		2.33801	0.0240001		14.6756	0.0908346
	1.59001	0.0742316		2.34001	0.0240863		14.685	0.0905605
	1.59201	0.0741461		2.34201	0.0241733		14.6944	0.0902756
	1.59401	0.0740583		2.34401	0.0242613		14.7038	0.0899852
	1.59601	0.0739683		2.34601	0.02435		14.7132	0.0896952
	1.59801	0.0738761		2.34801	0.0244395		14.7226	0.0894111
	1.60001	0.0737817		2.35001	0.0245297		14.732	0.0891389
	1.60201	0.0736852		2.35201	0.0246206		14.7414	0.0888841
	1.60401	0.0735867		2.35401	0.024712		14.7508	0.0886521
	1.60601	0.073486		2.35601	0.024804		14.7602	0.0884483
	1.60801	0.0733834		2.35801	0.0248965		14.7696	0.0882775
	1.61001	0.0732788		2.36001	0.0249893		14.779	0.0881441
	1.61201	0.0731722		2.36201	0.0250826		14.7884	0.0880521
	1.61401	0.0730638		2.36401	0.0251761		14.7978	0.0880048
	1.61601	0.0729536		2.36601	0.0252699		14.8072	0.0880052
	1.61801	0.0728415		2.36801	0.0253639		14.8166	0.0880553
	1.62001	0.0727277		2.37001	0.025458		14.826	0.0881568
	1.62201	0.0726122		2.37201	0.0255521		14.8354	0.0883103
	1.62401	0.072495		2.37401	0.0256463		14.8448	0.088516
	1.62601	0.0723762		2.37601	0.0257405		14.8542	0.0887733
	1.62801	0.0722558		2.37801	0.0258346		14.8636	0.089081
	1.63001	0.0721339		2.38001	0.0259286		14.873	0.0894371
	1.63201	0.0720106		2.38201	0.0260223		14.8824	0.0898389
	1.63401	0.0718858		2.38401	0.0261158		14.8918	0.0902832
	1.63601	0.0717596		2.38601	0.026209		14.9012	0.0907662
	1.63801	0.0716321		2.38801	0.0263019		14.9106	0.0912836
	1.64001	0.0715032		2.39001	0.0263943		14.92	0.0918306
	1.64201	0.0713732		2.39201	0.0264863		14.9294	0.092402
	1.64401	0.0712419		2.39401	0.0265778		14.9388	0.0929925
	1.64601	0.0711096		2.39601	0.0266687		14.9482	0.0935962
	1.64801	0.0709761		2.39801	0.0267591		14.9576	0.0942073
	1.65001	0.0708416		2.40001	0.0268488		14.967	0.0948199
	1.65201	0.0707061		2.40201	0.0269377		14.9764	0.0954281
	1.65401	0.0705696		2.40401	0.027026		14.9858	0.0960261
	1.65601	0.0704323		2.40601	0.0271134		14.9952	0.0966084
	1.65801	0.0702941		2.40801	0.0272		15.0046	0.0971698
	1.66001	0.0701552		2.41001	0.0272857		15.014	0.0977052
	1.66201	0.0700155		2.41201	0.0273705		15.0234	0.0982104
	1.66401	0.0698751		2.41401	0.0274543		15.0328	0.0986813
	1.66601	0.0697341		2.41601	0.0275371		15.0422	0.0991148
	1.66801	0.0695925		2.41801	0.0276188		15.0516	0.0995081
	1.67001	0.0694503		2.42001	0.0276994		15.061	0.0998593
	1.67201	0.0693077		2.42201	0.0277789		15.0704	0.100167
	1.67401	0.0691646		2.42401	0.0278573		15.0798	0.100431
	1.67601	0.0690212		2.42601	0.0279344		15.0892	0.100652
	1.67801	0.0688775		2.42801	0.0280103		15.0986	0.100829
	1.68001	0.0687335		2.43001	0.0280848		15.108	0.100966
	1.68201	0.0685892		2.43201	0.0281581		15.1174	0.101064
	1.68401	0.0684448		2.43401	0.02823		15.1268	0.101126
	1.68601	0.0683002		2.43601	0.0283006		15.1361	0.101156
	1.68801	0.0681556		2.43801	0.0283697		15.1455	0.101158
	1.69001	0.068011		2.44001	0.0284373		15.1549	0.101136
	1.69201	0.0678664		2.44201	0.0285035		15.1643	0.101094
	1.69401	0.0677219		2.44401	0.0285682		15.1737	0.101038
	1.69601	0.0675775		2.44601	0.0286313		15.1831	0.100972
	1.69801	0.0674333		2.44801	0.0286929		15.1925	0.100901
	1.70001	0.0672893		2.45001	0.0287529		15.2019	0.100829
	1.70201	0.0671457		2.45201	0.0288113		15.2113	0.100761
	1.70401	0.0670023		2.45401	0.0288681		15.2207	0.100701
	1.70601	0.0668593		2.45601	0.0289232		15.2301	0.100653
	1.70801	0.0667168		2.45801	0.0289766		15.2395	0.100618
	1.71001	0.0665748		2.46001	0.0290283		15.2489	0.100601
	1.71201	0.0664333		2.46201	0.0290783		15.2583	0.100602
	1.71401	0.0662924		2.46401	0.0291266		15.2677	0.100623
	1.71601	0.0661521		2.46601	0.0291732		15.2771	0.100663
	1.71801	0.0660124		2.46801	0.0292179		15.2865	0.100724
	1.72001	0.0658735		2.47001	0.0292609		15.2959	0.100804
	1.72201	0.0657354		2.47201	0.0293022		15.3053	0.100901
	1.72401	0.0655981		2.47401	0.0293416		15.3147	0.101015
	1.72601	0.0654617		2.47601	0.0293792		15.3241	0.101141
	1.72801	0.0653261		2.47801	0.0294149		15.3335	0.101278
	1.73001	0.0651915		2.48001	0.0294489		15.3429	0.101423
	1.73201	0.065058		2.48201	0.029481		15.3523	0.101573
	1.73401	0.0649254		2.48401	0.0295112		15.3617	0.101724
	1.73601	0.064794		2.48601	0.0295397		15.3711	0.101873
	1.73801	0.0646637		2.48801	0.0295662		15.3805	0.102018
	1.74001	0.0645345		2.49001	0.0295909		15.3899	0.102156
	1.74201	0.0644066		2.49201	0.0296138		15.3993	0.102285
	1.74401	0.06428		2.49401	0.0296348		15.4087	0.102403
	1.74601	0.0641546		2.49601	0.0296539		15.4181	0.10251
	1.74801	0.0640306		2.49801	0.0296712		15.4275	0.102604
	1.75001	0.063908		2.50001	0.0296866		15.4369	0.102686
	1.75201	0.0637868		2.50201	0.0297002		15.4463	0.102757
	1.75401	0.0636671		2.50401	0.0297119		15.4557	0.102818
	1.75601	0.0635489		2.50601	0.0297218		15.4651	0.102871
	1.75801	0.0634322		2.50801	0.0297299		15.4745	0.102919
	1.76001	0.0633171		2.51001	0.0297361		15.4839	0.102964
	1.76201	0.0632036		2.51201	0.0297405		15.4933	0.103011
	1.76401	0.0630918		2.51401	0.0297431		15.5027	0.103064
	1.76601	0.0629816		2.51601	0.0297439		15.5121	0.103125
	1.76801	0.0628732		2.51801	0.029743		15.5215	0.103199
	1.77001	0.0627666		2.52001	0.0297402		15.5309	0.10329
	1.77201	0.0626617		2.52201	0.0297357		15.5403	0.103401
	1.77401	0.0625587		2.52401	0.0297295		15.5497	0.103536
	1.77601	0.0624575		2.52601	0.0297215		15.5591	0.103698
	1.77801	0.0623582		2.52801	0.0297118		15.5685	0.10389
	1.78001	0.0622609		2.53001	0.0297004		15.5779	0.104112
	1.78201	0.0621655		2.53201	0.0296873		15.5873	0.104367
	1.78401	0.0620721		2.53401	0.0296726		15.5967	0.104654
	1.78601	0.0619807		2.53601	0.0296562		15.6061	0.104974
	1.78801	0.0618914		2.53801	0.0296382		15.6155	0.105325
	1.79001	0.0618041		2.54001	0.0296186		15.6248	0.105705
	1.79201	0.0617189		2.54201	0.0295975		15.6342	0.106111
	1.79401	0.0616359		2.54401	0.0295747		15.6436	0.106542
	1.79601	0.061555		2.54601	0.0295505		15.653	0.106992
	1.79801	0.0614763		2.54801	0.0295247		15.6624	0.107458
	1.80001	0.0613998		2.55001	0.0294974		15.6718	0.107935
	1.80201	0.0613255		2.55201	0.0294687		15.6812	0.108419
	1.80401	0.0612535		2.55401	0.0294386		15.6906	0.108905
	1.80601	0.0611838		2.55601	0.029407		15.7	0.109387
	1.80801	0.0611164		2.55801	0.0293741		15.7094	0.109862
	1.81001	0.0610512		2.56001	0.0293398		15.7188	0.110326
	1.81201	0.0609885		2.56201	0.0293042		15.7282	0.110774
	1.81401	0.060928		2.56401	0.0292673		15.7376	0.111202
	1.81601	0.06087		2.56601	0.0292291		15.747	0.11161
	1.81801	0.0608144		2.56801	0.0291896		15.7564	0.111993
	1.82001	0.0607612		2.57001	0.029149		15.7658	0.112351
	1.82201	0.0607104		2.57201	0.0291072		15.7752	0.112684
	1.82401	0.060662		2.57401	0.0290642		15.7846	0.11299
	1.82601	0.0606162		2.57601	0.0290201		15.794	0.11327
	1.82801	0.0605728		2.57801	0.028975		15.8034	0.113527
	1.83001	0.0605319		2.58001	0.0289287		15.8128	0.113761
	1.83201	0.0604935		2.58201	0.0288815		15.8222	0.113974
	1.83401	0.0604577		2.58401	0.0288332		15.8316	0.114169
	1.83601	0.0604243		2.58601	0.028784		15.841	0.114349
	1.83801	0.0603936		2.58801	0.0287339		15.8504	0.114517
	1.84001	0.0603654		2.59001	0.0286828		15.8598	0.114674
	1.84201	0.0603397		2.59201	0.0286309		15.8692	0.114825
	1.84401	0.0603166		2.59401	0.0285782		15.8786	0.114971
	1.84601	0.0602962		2.59601	0.0285247		15.888	0.115115
	1.84801	0.0602783		2.59801	0.0284704		15.8974	0.115258
	1.85001	0.060263		2.60001	0.0284154		15.9068	0.115401
	1.85201	0.0602503		2.60201	0.0283597		15.9162	0.115546
	1.85401	0.0602403		2.60401	0.0283033		15.9256	0.115691
	1.85601	0.0602329		2.60601	0.0282463		15.935	0.115837
	1.85801	0.0602281		2.60801	0.0281887		15.9444	0.115983
	1.86001	0.0602259		2.61001	0.0281305		15.9538	0.116127
	1.86201	0.0602264		2.61201	0.0280718		15.9632	0.116268
	1.86401	0.0602295		2.61401	0.0280126		15.9726	0.116402
	1.86601	0.0602352		2.61601	0.027953		15.982	0.116529
	1.86801	0.0602436		2.61801	0.0278929		15.9914	0.116644
	1.87001	0.0602547		2.62001	0.0278324		16.0008	0.116746
	1.87201	0.0602684		2.62201	0.0277715		16.0102	0.116831
	1.87401	0.0602847		2.62401	0.0277103		16.0196	0.116898
	1.87601	0.0603037		2.62601	0.0276488		16.029	0.116945
	1.87801	0.0603253		2.62801	0.0275871		16.0384	0.11697
	1.88001	0.0603496		2.63001	0.0275251		16.0478	0.116973
	1.88201	0.0603765		2.63201	0.0274629		16.0572	0.116952
	1.88401	0.060406		2.63401	0.0274005		16.0666	0.116909
	1.88601	0.0604382		2.63601	0.027338		16.076	0.116845
	1.88801	0.060473		2.63801	0.0272754		16.0854	0.116761
	1.89001	0.0605104		2.64001	0.0272126		16.0948	0.116661
	1.89201	0.0605504		2.64201	0.0271499		16.1041	0.116547
	1.89401	0.0605931		2.64401	0.0270871		16.1135	0.116424
	1.89601	0.0606383		2.64601	0.0270243		16.1229	0.116296
	1.89801	0.0606862		2.64801	0.0269615		16.1323	0.116169
	1.90001	0.0607366		2.65001	0.0268989		16.1417	0.116047
	1.90201	0.0607897		2.65201	0.0268363		16.1511	0.115937
	1.90401	0.0608453		2.65401	0.0267738		16.1605	0.115844
	1.90601	0.0609034		2.65601	0.0267114		16.1699	0.115773
	1.90801	0.0609641		2.65801	0.0266493		16.1793	0.115729
	1.91001	0.0610274		2.66001	0.0265873		16.1887	0.115718
	1.91201	0.0610932		2.66201	0.0265256		16.1981	0.115743
	1.91401	0.0611615		2.66401	0.0264641		16.2075	0.115809
	1.91601	0.0612323		2.66601	0.0264029		16.2169	0.115918
	1.91801	0.0613057		2.66801	0.0263419		16.2263	0.116071
	1.92001	0.0613815		2.67001	0.0262813		16.2357	0.11627
	1.92201	0.0614597		2.67201	0.0262211		16.2451	0.116514
	1.92401	0.0615405		2.67401	0.0261612		16.2545	0.116803
	1.92601	0.0616237		2.67601	0.0261017		16.2639	0.117134
	1.92801	0.0617093		2.67801	0.0260425		16.2733	0.117504
	1.93001	0.0617973		2.68001	0.0259839		16.2827	0.117908
	1.93201	0.0618877		2.68201	0.0259256		16.2921	0.118343
	1.93401	0.0619805		2.68401	0.0258679		16.3015	0.118802
	1.93601	0.0620757		2.68601	0.0258106		16.3109	0.119279
	1.93801	0.0621732		2.68801	0.0257538		16.3203	0.119768
	1.94001	0.062273		2.69001	0.0256976		16.3297	0.120262
	1.94201	0.0623752		2.69201	0.0256419		16.3391	0.120754
	1.94401	0.0624796		2.69401	0.0255867		16.3485	0.121237
	1.94601	0.0625863		2.69601	0.0255321		16.3579	0.121704
	1.94801	0.0626953		2.69801	0.0254781		16.3673	0.122149
	1.95001	0.0628065		2.70001	0.0254247		16.3767	0.122567
	1.95201	0.0629199		2.70201	0.0253719		16.3861	0.122953
	1.95401	0.0630355		2.70401	0.0253198		16.3955	0.123301
	1.95601	0.0631533		2.70601	0.0252683		16.4049	0.12361
	1.95801	0.0632733		2.70801	0.0252174		16.4143	0.123876
	1.96001	0.0633954		2.71001	0.0251672		16.4237	0.124098
	1.96201	0.0635195		2.71201	0.0251176		16.4331	0.124275
	1.96401	0.0636458		2.71401	0.0250688		16.4425	0.124409
	1.96601	0.0637742		2.71601	0.0250206		16.4519	0.124501
	1.96801	0.0639045		2.71801	0.0249731		16.4613	0.124553
	1.97001	0.0640369		2.72001	0.0249263		16.4707	0.124569
	1.97201	0.0641713		2.72201	0.0248803		16.4801	0.124552
	1.97401	0.0643076		2.72401	0.024835		16.4895	0.124508
	1.97601	0.064446		2.72601	0.0247904		16.4989	0.124441
	1.97801	0.0645862		2.72801	0.0247465		16.5083	0.124357
	1.98001	0.0647283		2.73001	0.0247033		16.5177	0.124261
	1.98201	0.0648723		2.73201	0.0246609		16.5271	0.124161
	1.98401	0.0650181		2.73401	0.0246193		16.5365	0.12406
	1.98601	0.0651657		2.73601	0.0245784		16.5459	0.123965
	1.98801	0.0653151		2.73801	0.0245382		16.5553	0.12388
	1.99001	0.0654663		2.74001	0.0244988		16.5647	0.123812
	1.99201	0.0656192		2.74201	0.0244602		16.5741	0.123763
	1.99401	0.0657739		2.74401	0.0244223		16.5834	0.123737
	1.99601	0.0659302		2.74601	0.0243851		16.5928	0.123739
	1.99801	0.0660881		2.74801	0.0243487		16.6022	0.123769
	2.00001	0.0662477		2.75001	0.0243131		16.6116	0.123829
	2.00201	0.0664089		2.75201	0.0242782		16.621	0.12392
	2.00401	0.0665716		2.75401	0.024244		16.6304	0.124042
	2.00601	0.0667359		2.75601	0.0242106		16.6398	0.124195
	2.00801	0.0669016		2.75801	0.024178		16.6492	0.124376
	2.01001	0.0670689		2.76001	0.024146		16.6586	0.124585
	2.01201	0.0672376		2.76201	0.0241149		16.668	0.124819
	2.01401	0.0674077		2.76401	0.0240844		16.6774	0.125075
	2.01601	0.0675792		2.76601	0.0240547		16.6868	0.125351
	2.01801	0.067752		2.76801	0.0240257		16.6962	0.125641
	2.02001	0.0679262		2.77001	0.0239974		16.7056	0.125944
	2.02201	0.0681016		2.77201	0.0239698		16.715	0.126256
	2.02401	0.0682783		2.77401	0.0239429		16.7244	0.126572
	2.02601	0.0684562		2.77601	0.0239167		16.7338	0.126891
	2.02801	0.0686353		2.77801	0.0238912		16.7432	0.127208
	2.03001	0.0688156		2.78001	0.0238664		16.7526	0.12752
	2.03201	0.068997		2.78201	0.0238422		16.762	0.127826
	2.03401	0.0691795		2.78401	0.0238187		16.7714	0.128123
	2.03601	0.069363		2.78601	0.0237959		16.7808	0.128409
	2.03801	0.0695476		2.78801	0.0237737		16.7902	0.128683
	2.04001	0.0697331		2.79001	0.0237522		16.7996	0.128945
	2.04201	0.0699197		2.79201	0.0237313		16.809	0.129194
	2.04401	0.0701071		2.79401	0.023711		16.8184	0.12943
	2.04601	0.0702954		2.79601	0.0236913		16.8278	0.129653
	2.04801	0.0704846		2.79801	0.0236722		16.8372	0.129866
	2.05001	0.0706746		2.80001	0.0236537		16.8466	0.130069
	2.05201	0.0708653		2.80201	0.0236358		16.856	0.130263
	2.05401	0.0710568		2.80401	0.0236184		16.8654	0.130452
	2.05601	0.071249		2.80601	0.0236016		16.8748	0.130636
	2.05801	0.0714419		2.80801	0.0235854		16.8842	0.130819
	2.06001	0.0716354		2.81001	0.0235697		16.8936	0.131002
	2.06201	0.0718295		2.81201	0.0235545		16.903	0.131188
	2.06401	0.0720242		2.81401	0.0235398		16.9124	0.131378
	2.06601	0.0722194		2.81601	0.0235256		16.9218	0.131576
	2.06801	0.0724151		2.81801	0.0235119		16.9312	0.131783
	2.07001	0.0726112		2.82001	0.0234987		16.9406	0.132
	2.07201	0.0728078		2.82201	0.023486		16.95	0.132228
	2.07401	0.0730047		2.82401	0.0234737		16.9594	0.13247
	2.07601	0.073202		2.82601	0.0234619		16.9688	0.132724
	2.07801	0.0733995		2.82801	0.0234505		16.9782	0.132992
	2.08001	0.0735973		2.83001	0.0234395		16.9876	0.133273
	2.08201	0.0737953		2.83201	0.023429		16.997	0.133566
	2.08401	0.0739935		2.83401	0.0234188		17.0064	0.13387
	2.08601	0.0741919		2.83601	0.0234091		17.0158	0.134183
	2.08801	0.0743903		2.83801	0.0233997		17.0252	0.134504
	2.09001	0.0745888		2.84001	0.0233907		17.0346	0.13483
	2.09201	0.0747874		2.84201	0.023382		17.044	0.135159
	2.09401	0.0749859		2.84401	0.0233737		17.0534	0.135487
	2.09601	0.0751843		2.84601	0.0233657		17.0628	0.135811
	2.09801	0.0753827		2.84801	0.0233581		17.0722	0.136128
	2.10001	0.0755809		2.85001	0.0233508		17.0815	0.136435
	2.10201	0.0757789		2.85201	0.0233438		17.0909	0.136729
	2.10401	0.0759768		2.85401	0.0233371		17.1003	0.137005
	2.10601	0.0761743		2.85601	0.0233307		17.1097	0.137261
	2.10801	0.0763716		2.85801	0.0233245		17.1191	0.137495
	2.11001	0.0765685		2.86001	0.0233187		17.1285	0.137702
	2.11201	0.076765		2.86201	0.0233131		17.1379	0.137882
	2.11401	0.0769611		2.86401	0.0233077		17.1473	0.138032
	2.11601	0.0771568		2.86601	0.0233026		17.1567	0.13815
	2.11801	0.0773519		2.86801	0.0232978		17.1661	0.138236
	2.12001	0.0775465		2.87001	0.0232932		17.1755	0.13829
	2.12201	0.0777405		2.87201	0.0232888		17.1849	0.138311
	2.12401	0.0779338		2.87401	0.0232846		17.1943	0.1383
	2.12601	0.0781265		2.87601	0.0232807		17.2037	0.138258
	2.12801	0.0783185		2.87801	0.0232769		17.2131	0.138187
	2.13001	0.0785097		2.88001	0.0232734		17.2225	0.138089
	2.13201	0.0787001		2.88201	0.0232701		17.2319	0.137967
	2.13401	0.0788897		2.88401	0.0232669		17.2413	0.137824
	2.13601	0.0790784		2.88601	0.0232639		17.2507	0.137663
	2.13801	0.0792661		2.88801	0.0232612		17.2601	0.137488
	2.14001	0.0794529		2.89001	0.0232586		17.2695	0.137303
	2.14201	0.0796387		2.89201	0.0232562		17.2789	0.137112
	2.14401	0.0798234		2.89401	0.0232539		17.2883	0.136918
	2.14601	0.080007		2.89601	0.0232519		17.2977	0.136727
	2.14801	0.0801895		2.89801	0.02325		17.3071	0.136542
	2.15001	0.0803708		2.90001	0.0232482		17.3165	0.136367
	2.15201	0.0805508		2.90201	0.0232467		17.3259	0.136205
	2.15401	0.0807296		2.90401	0.0232453		17.3353	0.136061
	2.15601	0.0809071		2.90601	0.0232441		17.3447	0.135936
	2.15801	0.0810832		2.90801	0.023243		17.3541	0.135834
	2.16001	0.081258		2.91001	0.0232421		17.3635	0.135757
	2.16201	0.0814313		2.91201	0.0232414		17.3729	0.135707
	2.16401	0.0816031		2.91401	0.0232408		17.3823	0.135685
	2.16601	0.0817734		2.91601	0.0232404		17.3917	0.135692
	2.16801	0.0819421		2.91801	0.0232402		17.4011	0.13573
	2.17001	0.0821092		2.92001	0.0232402		17.4105	0.135797
	2.17201	0.0822747		2.92201	0.0232404		17.4199	0.135895
	2.17401	0.0824385		2.92401	0.0232407		17.4293	0.136022
	2.17601	0.0826005		2.92601	0.0232412		17.4387	0.136177
	2.17801	0.0827608		2.92801	0.0232419		17.4481	0.136361
	2.18001	0.0829193		2.93001	0.0232428		17.4575	0.13657
	2.18201	0.0830759		2.93201	0.0232439		17.4669	0.136805
	2.18401	0.0832305		2.93401	0.0232452		17.4763	0.137063
	2.18601	0.0833833		2.93601	0.0232468		17.4857	0.137343
	2.18801	0.0835341		2.93801	0.0232485		17.4951	0.137643
	2.19001	0.0836828		2.94001	0.0232505		17.5045	0.137961
	2.19201	0.0838295		2.94201	0.0232527		17.5139	0.138295
	2.19401	0.083974		2.94401	0.0232551		17.5233	0.138643
	2.19601	0.0841164		2.94601	0.0232578		17.5327	0.139005
	2.19801	0.0842567		2.94801	0.0232608		17.5421	0.139377
	2.20001	0.0843947		2.95001	0.023264		17.5514	0.139758
	2.20201	0.0845304		2.95201	0.0232675		17.5608	0.140147
	2.20401	0.0846638		2.95401	0.0232713		17.5702	0.140542
	2.20601	0.0847949		2.95601	0.0232753		17.5796	0.14094
	2.20801	0.0849236		2.95801	0.0232797		17.589	0.14134
	2.21001	0.0850499		2.96001	0.0232844		17.5984	0.141741
	2.21201	0.0851737		2.96201	0.0232894		17.6078	0.14214
	2.21401	0.085295		2.96401	0.0232947		17.6172	0.142535
	2.21601	0.0854138		2.96601	0.0233004		17.6266	0.142925
	2.21801	0.08553		2.96801	0.0233065		17.636	0.143307
	2.22001	0.0856436		2.97001	0.0233129		17.6454	0.14368
	2.22201	0.0857545		2.97201	0.0233197		17.6548	0.144042
	2.22401	0.0858628		2.97401	0.0233269		17.6642	0.14439
	2.22601	0.0859683		2.97601	0.0233345		17.6736	0.144722
	2.22801	0.0860711		2.97801	0.0233425		17.683	0.145037
	2.23001	0.086171		2.98001	0.0233509		17.6924	0.145333
	2.23201	0.0862682		2.98201	0.0233598		17.7018	0.145609
	2.23401	0.0863624		2.98401	0.0233692		17.7112	0.145861
	2.23601	0.0864538		2.98601	0.023379		17.7206	0.146091
	2.23801	0.0865423		2.98801	0.0233893		17.73	0.146296
	2.24001	0.0866278		2.99001	0.0234001		17.7394	0.146477
	2.24201	0.0867102		2.99201	0.0234114		17.7488	0.146633
	2.24401	0.0867897		2.99401	0.0234232		17.7582	0.146765
	2.24601	0.0868661		2.99601	0.0234356		17.7676	0.146872
	2.24801	0.0869394		2.99801	0.0234485		17.777	0.146958
	2.25001	0.0870095		3.00001	0.023462		17.7864	0.147022
	2.25201	0.0870765		3.00201	0.0234761		17.7958	0.147068
	2.25401	0.0871404		3.00401	0.0234908		17.8052	0.147097
	2.25601	0.087201		3.00601	0.023506		17.8146	0.147114
	2.25801	0.0872584		3.00801	0.0235219		17.824	0.14712
	2.26001	0.0873125		3.01001	0.0235385		17.8334	0.14712
	2.26201	0.0873633		3.01201	0.0235557		17.8428	0.147117
	2.26401	0.0874108		3.01401	0.0235735		17.8522	0.147115
	2.26601	0.0874549		3.01601	0.023592		17.8616	0.147119
	2.26801	0.0874956		3.01801	0.0236113		17.871	0.147131
	2.27001	0.087533		3.02001	0.0236312		17.8804	0.147155
	2.27201	0.0875669		3.02201	0.0236518		17.8898	0.147196
	2.27401	0.0875974		3.02401	0.0236732		17.8992	0.147255
	2.27601	0.0876244		3.02601	0.0236953		17.9086	0.147335
	2.27801	0.0876479		3.02801	0.0237182		17.918	0.147439
	2.28001	0.0876679		3.03001	0.0237419		17.9274	0.147568
	2.28201	0.0876843		3.03201	0.0237663		17.9368	0.147723
	2.28401	0.0876972		3.03401	0.0237915		17.9462	0.147903
	2.28601	0.0877065		3.03601	0.0238176		17.9556	0.148109
	2.28801	0.0877123		3.03801	0.0238444		17.965	0.14834
	2.29001	0.0877144		3.04001	0.0238721		17.9744	0.148592
	2.29201	0.0877129		3.04201	0.0239006		17.9838	0.148865
	2.29401	0.0877077		3.04401	0.02393		17.9932	0.149154
	2.29601	0.0876989		3.04601	0.0239602		18.0026	0.149457
	2.29801	0.0876863		3.04801	0.0239913		18.012	0.149768
	2.30001	0.0876702		3.05001	0.0240233		18.0214	0.150085
	2.30201	0.0876502		3.05201	0.0240562		18.0308	0.150401
	2.30401	0.0876266		3.05401	0.02409		18.0401	0.150714
	2.30601	0.0875993		3.05601	0.0241247		18.0495	0.151017
	2.30801	0.0875682		3.05801	0.0241603		18.0589	0.151307
	2.31001	0.0875333		3.06001	0.0241968		18.0683	0.151579
	2.31201	0.0874947		3.06201	0.0242343		18.0777	0.15183
	2.31401	0.0874524		3.06401	0.0242727		18.0871	0.152057
	2.31601	0.0874062		3.06601	0.024312		18.0965	0.152255
	2.31801	0.0873563		3.06801	0.0243523		18.1059	0.152425
	2.32001	0.0873026		3.07001	0.0243936		18.1153	0.152564
	2.32201	0.0872451		3.07201	0.0244358		18.1247	0.152671
	2.32401	0.0871839		3.07401	0.024479		18.1341	0.152748
	2.32601	0.0871188		3.07601	0.0245232		18.1435	0.152795
	2.32801	0.0870499		3.07801	0.0245683		18.1529	0.152815
	2.33001	0.0869772		3.08001	0.0246144		18.1623	0.152809
	2.33201	0.0869008		3.08201	0.0246615		18.1717	0.152782
	2.33401	0.0868205		3.08401	0.0247095		18.1811	0.152738
	2.33601	0.0867364		3.08601	0.0247585		18.1905	0.15268
	2.33801	0.0866486		3.08801	0.0248085		18.1999	0.152616
	2.34001	0.0865569		3.09001	0.0248595		18.2093	0.15255
	2.34201	0.0864615		3.09201	0.0249115		18.2187	0.152488
	2.34401	0.0863623		3.09401	0.0249644		18.2281	0.152436
	2.34601	0.0862594		3.09601	0.0250184		18.2375	0.1524
	2.34801	0.0861526		3.09801	0.0250732		18.2469	0.152387
	2.35001	0.0860421		3.10001	0.0251291		18.2563	0.152401
	2.35201	0.0859279		3.10201	0.0251859		18.2657	0.152449
	2.35401	0.08581		3.10401	0.0252437		18.2751	0.152535
	2.35601	0.0856883		3.10601	0.0253024		18.2845	0.152664
	2.35801	0.0855629		3.10801	0.0253621		18.2939	0.152839
	2.36001	0.0854339		3.11001	0.0254227		18.3033	0.153063
	2.36201	0.0853011		3.11201	0.0254842		18.3127	0.153339
	2.36401	0.0851647		3.11401	0.0255467		18.3221	0.153668
	2.36601	0.0850246		3.11601	0.02561		18.3315	0.154051
	2.36801	0.084881		3.11801	0.0256743		18.3409	0.154487
	2.37001	0.0847337		3.12001	0.0257395		18.3503	0.154976
	2.37201	0.0845828		3.12201	0.0258055		18.3597	0.155514
	2.37401	0.0844284		3.12401	0.0258724		18.3691	0.1561
	2.37601	0.0842704		3.12601	0.0259402		18.3785	0.15673
	2.37801	0.0841089		3.12801	0.0260088		18.3879	0.1574
	2.38001	0.0839439		3.13001	0.0260783		18.3973	0.158104
	2.38201	0.0837754		3.13201	0.0261485		18.4067	0.158837
	2.38401	0.0836035		3.13401	0.0262196		18.4161	0.159593
	2.38601	0.0834282		3.13601	0.0262914		18.4255	0.160366
	2.38801	0.0832495		3.13801	0.0263641		18.4349	0.16115
	2.39001	0.0830674		3.14001	0.0264374		18.4443	0.161937
	2.39201	0.082882		3.14201	0.0265115		18.4537	0.162721
	2.39401	0.0826933		3.14401	0.0265863		18.4631	0.163495
	2.39601	0.0825013		3.14601	0.0266618		18.4725	0.164253
	2.39801	0.0823061		3.14801	0.0267379		18.4819	0.164988
	2.40001	0.0821077		3.15001	0.0268148		18.4913	0.165695
	2.40201	0.0819061		3.15201	0.0268922		18.5007	0.166369
	2.40401	0.0817014		3.15401	0.0269703		18.5101	0.167004
	2.40601	0.0814937		3.15601	0.0270489		18.5194	0.167598
	2.40801	0.0812828		3.15801	0.0271281		18.5288	0.168147
	2.41001	0.081069		3.16001	0.0272078		18.5382	0.168649
	2.41201	0.0808522		3.16201	0.0272881		18.5476	0.169103
	2.41401	0.0806324		3.16401	0.0273688		18.557	0.169508
	2.41601	0.0804098		3.16601	0.02745		18.5664	0.169864
	2.41801	0.0801843		3.16801	0.0275316		18.5758	0.170174
	2.42001	0.079956		3.17001	0.0276136		18.5852	0.170439
	2.42201	0.079725		3.17201	0.027696		18.5946	0.170664
	2.42401	0.0794912		3.17401	0.0277788		18.604	0.170852
	2.42601	0.0792548		3.17601	0.0278619		18.6134	0.171007
	2.42801	0.0790157		3.17801	0.0279453		18.6228	0.171136
	2.43001	0.0787741		3.18001	0.0280289		18.6322	0.171245
	2.43201	0.07853		3.18201	0.0281128		18.6416	0.171339
	2.43401	0.0782834		3.18401	0.0281969		18.651	0.171426
	2.43601	0.0780343		3.18601	0.0282811		18.6604	0.171511
	2.43801	0.0777829		3.18801	0.0283655		18.6698	0.171602
	2.44001	0.0775292		3.19001	0.02845		18.6792	0.171706
	2.44201	0.0772732		3.19201	0.0285346		18.6886	0.171826
	2.44401	0.077015		3.19401	0.0286192		18.698	0.17197
	2.44601	0.0767547		3.19601	0.0287038		18.7074	0.172142
	2.44801	0.0764922		3.19801	0.0287885		18.7168	0.172345
	2.45001	0.0762278		3.20001	0.028873		18.7262	0.172582
	2.45201	0.0759613		3.20201	0.0289575		18.7356	0.172855
	2.45401	0.0756929		3.20401	0.0290418		18.745	0.173164
	2.45601	0.0754226		3.20601	0.029126		18.7544	0.173508
	2.45801	0.0751505		3.20801	0.02921		18.7638	0.173886
	2.46001	0.0748767		3.21001	0.0292938		18.7732	0.174295
	2.46201	0.0746012		3.21201	0.0293772		18.7826	0.17473
	2.46401	0.074324		3.21401	0.0294604		18.792	0.175186
	2.46601	0.0740453		3.21601	0.0295433		18.8014	0.175657
	2.46801	0.0737651		3.21801	0.0296258		18.8108	0.176136
	2.47001	0.0734834		3.22001	0.0297079		18.8202	0.176615
	2.47201	0.0732004		3.22201	0.0297895		18.8296	0.177087
	2.47401	0.072916		3.22401	0.0298707		18.839	0.177543
	2.47601	0.0726304		3.22601	0.0299514		18.8484	0.177975
	2.47801	0.0723437		3.22801	0.0300315		18.8578	0.178376
	2.48001	0.0720558		3.23001	0.030111		18.8672	0.178738
	2.48201	0.0717668		3.23201	0.0301899		18.8766	0.179056
	2.48401	0.0714769		3.23401	0.0302681		18.886	0.179322
	2.48601	0.071186		3.23601	0.0303457		18.8954	0.179535
	2.48801	0.0708943		3.23801	0.0304225		18.9048	0.179689
	2.49001	0.0706018		3.24001	0.0304985		18.9142	0.179785
	2.49201	0.0703086		3.24201	0.0305738		18.9236	0.179821
	2.49401	0.0700147		3.24401	0.0306482		18.933	0.179801
	2.49601	0.0697203		3.24601	0.0307218		18.9424	0.179726
	2.49801	0.0694254		3.24801	0.0307944		18.9518	0.179603
	2.50001	0.06913		3.25001	0.0308661		18.9612	0.179438
	2.50201	0.0688343		3.25201	0.0309369		18.9706	0.179239
	2.50401	0.0685382		3.25401	0.0310066		18.98	0.179014
	2.50601	0.068242		3.25601	0.0310753		18.9894	0.178773
	2.50801	0.0679456		3.25801	0.0311429		18.9988	0.178528
	2.51001	0.0676491		3.26001	0.0312094		19.0081	0.17829
	2.51201	0.0673525		3.26201	0.0312747		19.0175	0.178069
	2.51401	0.0670561		3.26401	0.0313389		19.0269	0.177878
	2.51601	0.0667598		3.26601	0.0314019		19.0363	0.177726
	2.51801	0.0664636		3.26801	0.0314637		19.0457	0.177623
	2.52001	0.0661678		3.27001	0.0315242		19.0551	0.177579
	2.52201	0.0658723		3.27201	0.0315834		19.0645	0.1776
	2.52401	0.0655772		3.27401	0.0316412		19.0739	0.177692
	2.52601	0.0652826		3.27601	0.0316977		19.0833	0.177859
	2.52801	0.0649885		3.27801	0.0317528		19.0927	0.178103
	2.53001	0.0646951		3.28001	0.0318066		19.1021	0.178424
	2.53201	0.0644024		3.28201	0.0318588		19.1115	0.17882
	2.53401	0.0641105		3.28401	0.0319097		19.1209	0.179287
	2.53601	0.0638194		3.28601	0.031959		19.1303	0.179818
	2.53801	0.0635292		3.28801	0.0320068		19.1397	0.180406
	2.54001	0.0632401		3.29001	0.0320531		19.1491	0.18104
	2.54201	0.062952		3.29201	0.0320978		19.1585	0.18171
	2.54401	0.062665		3.29401	0.0321409		19.1679	0.182403
[truncated: 28,728 more rows]

## Sheet: Fig5B
	2.5V/nm		2.0V/nm		1.5V/nm		1V/nm		without MIRS
	0		0		0		0		0
	-2.43903		-3.07734		-1.33157		-1.50824		-0.0717255
	-4.16015		-4.84949		-2.42229		-2.63298		-1.15117
	-5.60165		-6.08306		-3.29352		-3.55807		-1.51975
	-6.70088		-7.37359		-4.03897		-4.29594		-2.17777
	-7.52506		-8.52427		-4.71208		-4.89486		-2.50024
	-8.57481		-9.5048		-5.48232		-5.62285		-2.93786
	-9.39032		-10.4402		-6.16686		-6.22287		-3.30464
	-10.0962		-11.1388		-6.77297		-6.74767		-3.82609
	-10.751		-11.7157		-7.3229		-7.22956		-4.29438
	-11.2509		-12.0433		-7.79659		-7.619		-4.82493
	-11.6916		-12.2968		-8.23504		-7.97067		-5.31197
	-12.0538		-12.5095		-8.63081		-8.27386		-5.76813
	-12.3574		-12.7955		-8.99222		-8.53986		-6.25294
	-12.6126		-13.2613		-9.32188		-8.77379		-6.64886
	-12.8403		-13.8861		-9.61588		-8.98247		-7.06053
	-13.0467		-14.4816		-9.87671		-9.16937		-7.42605
	-13.2353		-15.0038		-10.0962		-9.33258		-7.73383
	-13.3998		-15.3642		-10.2758		-9.47025		-7.97885
	-13.5253		-15.5448		-10.4218		-9.57886		-8.16825
	-13.5649		-15.5503		-10.5411		-9.64242		-8.31356
	-13.5544		-15.3984		-10.6398		-9.67769		-8.45281
	-13.5007		-15.1211		-10.7226		-9.68929		-8.6249
	-13.421		-14.7565		-10.7902		-9.68448		-8.79001
	-13.6973		-14.3581		-11.0447		-9.89679		-8.9479
	-13.5577		-14.3568		-11.0437		-9.84055		-9.03983
	-13.4182		-14.1156		-10.8581		-9.71052		-9.07247
	-13.2786		-13.8077		-10.6213		-9.55996		-9.03749
	-13.1391		-13.6906		-10.5312		-9.46813		-8.94825
	-12.9995		-13.4057		-10.3121		-9.32465		-8.80601
	-12.86		-13.2661		-10.2047		-9.22587		-8.65384
	-12.8171		-13.1108		-10.0853		-9.16094		-8.44012
	-12.7869		-13.0116		-10.0089		-9.11832		-8.21913
	-12.8442		-13.0516		-10.0397		-9.15357		-8.00557
	-13.0185		-13.268		-10.2061		-9.28985		-7.81936
	-13.2781		-13.4478		-10.3445		-9.44904		-7.64426
	-13.5917		-13.6159		-10.4738		-9.62619		-7.46607
	-13.9646		-14.0302		-10.7924		-9.90281		-7.35559
	-14.3848		-14.1259		-10.8661		-10.1004		-7.25204
	-14.8355		-14.5537		-11.1951		-10.4123		-7.11146
	-15.2863		-15.139		-11.6454		-10.7727		-7.06796
	-15.737		-15.6737		-12.0567		-11.1175		-6.97488
	-16.1432		-16.0861		-12.3739		-11.4069		-7.01069
	-16.5369		-16.539		-12.7223		-11.7037		-7.00309
	-16.8746		-16.9008		-13.0006		-11.9501		-6.98027
	-17.1357		-17.1335		-13.1796		-12.1261		-6.99047
	-17.3268		-17.3938		-13.3798		-12.2827		-7.08573
	-17.464		-17.6382		-13.5678		-12.4127		-7.22819
	-17.501		-17.8592		-13.7379		-12.4956		-7.37369
	-17.368		-17.9748		-13.8268		-12.4779		-7.59356
	-17.0816		-17.8732		-13.7486		-12.3321		-7.80318
	-16.7953		-17.4867		-13.4513		-12.0986		-7.99101
	-16.5089		-16.8224		-12.9403		-11.7797		-8.11542
	-16.2225		-15.8848		-12.2191		-11.3766		-8.23372
	-15.9361		-14.8223		-11.4018		-10.9352		-8.23007
	-15.6497		-13.8557		-10.6583		-10.5232		-8.19734
	-15.3633		-13.6441		-10.4955		-10.3435		-8.07594
	-15.0946		-13.4467		-10.3436		-10.1753		-7.9207
	-14.8261		-13.756		-10.5815		-10.1631		-7.77964
	-14.6267		-14.0868		-10.336		-9.98509		-7.67592
	-14.6373		-14.4682		-10.1176		-9.90197		-7.63452
	-14.8431		-14.846		-10.3818		-10.09		-7.64345
	-15.0574		-14.9458		-10.4516		-10.2036		-7.64045
	-15.2716		-15.0809		-10.5461		-10.3271		-7.71395
	-15.4859		-15.0824		-10.5472		-10.4132		-7.8719
	-15.7001		-15.2991		-10.6987		-10.5595		-8.13247
	-15.9144		-15.9657		-11.1648		-10.8317		-8.43188
	-16.1286		-16.5179		-11.551		-11.0718		-8.68534
	-16.3252		-16.8386		-11.7752		-11.2402		-8.8956
	-16.5216		-17.0141		-11.8979		-11.3678		-9.03748
	-16.6896		-17.0672		-11.9351		-11.4499		-9.06074
	-16.7703		-17.025		-10.841		-11.0445		-9.00947
	-16.7788		-16.9324		-10.8031		-11.0328		-8.8194
	-16.7788		-16.75		-10.8177		-11.0386		-8.55648
	-16.7788		-16.5825		-10.8786		-11.063		-8.14345
	-16.7788		-16.5463		-10.9944		-11.1093		-7.8437
	-16.7788		-16.5575		-11.1621		-11.1764		-7.59591
	-16.8365		-16.2982		-11.3927		-11.2917		-7.45539
	-17.0098		-16.3365		-11.6888		-11.4794		-7.7256
	-17.2782		-16.0301		-12.0484		-11.7307		-8.04302
	-17.5675		-16.0706		-12.4677		-12.0141		-8.41749
	-17.8567		-15.8703		-12.9468		-12.3214		-8.71359
	-18.1459		-16.275		-13.4917		-12.655		-9.19493
	-18.4352		-17.0235		-14.083		-13.0073		-9.61903
	-18.7244		-17.906		-14.6456		-13.348		-10.1218
	-19.0136		-18.6334		-15.1709		-13.6738		-10.5984
	-19.3029		-19.2009		-15.6414		-13.9777		-11.174
	-19.5921		-19.6439		-16.0599		-14.2608		-11.7754
	-19.8236		-19.9066		-16.4156		-14.4957		-12.3569
	-19.902		-19.902		-16.7057		-14.6431		-12.9043
	-19.3489		-19.7161		-16.9324		-14.7145		-13.401
	-19.0528		-19.0042		-17.0993		-14.739		-13.8145
	-18.4445		-18.7919		-17.2121		-14.7364		-14.1341
	-18.3306		-18.5052		-17.2798		-14.7134		-14.3519
	-18.0031		-18.265		-17.3099		-14.6693		-14.4346
	-17.4519		-17.9839		-17.3023		-14.5998		-14.41
	-17.2768		-17.8821		-17.2642		-14.5074		-14.2831
	-17.0907		-17.8345		-17.1941		-14.3975		-14.0845
	-16.889		-17.7207		-17.0834		-14.2645		-13.7922
	-16.6864		-17.5212		-16.9292		-14.1137		-13.4206
	-16.5167		-17.3206		-16.7212		-13.9558		-13.0206
	-16.3466		-17.2283		-16.4662		-13.779		-12.5283
	-16.1902		-17.0969		-16.1656		-13.5899		-12.0969
	-16.0314		-17.0791		-15.8225		-13.3828		-11.6791
	-15.775		-17.0899		-15.4178		-13.1081		-11.2899
	-15.5321		-16.67		-14.9946		-12.832		-10.725
	-15.313		-16.836		-14.4771		-12.5286		-10.53
	-15.1177		-16.5475		-14.0115		-12.2564		-9.53961
	-14.9334		-15.6798		-13.5933		-12.008		-9.31651
	-14.7648		-15.4878		-13.2656		-11.8027		-8.90651
	-14.597		-15.0198		-13.0908		-11.659		-8.51651
	-14.58		-14.7798		-13.0711		-11.6436		-8.31651
	-14.9247		-14.5998		-13.1795		-11.8387		-7.91651
	-15.3813		-14.2638		-13.3829		-12.1209		-7.88651
	-15.9145		-14.0981		-13.6953		-12.4805		-8.06651
	-16.6034		-14.004		-14.1182		-12.9528		-9.51651
	-17.3257		-14.3774		-14.6282		-13.4746		-9.81651
	-18.0671		-16.9367		-15.2825		-14.0625		-9.95876
	-18.8214		-19.7325		-15.9412		-14.6579		-10.4165
	-19.5763		-20.506		-16.5909		-15.2499		-11.4184
	-20.3323		-21.0282		-17.2206		-15.8345		-12.3474
	-21.0898		-21.4686		-17.761		-16.3839		-13.0907
	-21.6993		-21.7493		-18.2221		-16.8365		-13.5435
	-21.9798		-21.9097		-18.6021		-17.112		-14.1538
	-22.1682		-22.023		-19.0668		-17.3807		-14.6014
	-22.0944		-22.0174		-19.4684		-17.5969		-15.2055
	-22.386		-22.0328		-20.1221		-17.7787		-15.5373
	-22.4554		-22.0956		-20.3098		-17.5243		-15.8548
	-22.3004		-22.0891		-20.7614		-17.8403		-15.9142
	-22.5214		-22.0452		-20.8783		-18.1407		-16.1886
	-22.5647		-22.0581		-20.9947		-18.463
	-22.5331		-22.2382		-20.9992		-18.582
	-22.58		-22.332		-21.007

## Sheet: Fig5C
	2.5V/nm		2.0V/nm		1.5V/nm		1V/nm		without MIRS
	1e-06		1e-06		1e-06		1e-06		2e-06
	-1.45969		-0.65969		-0.659687		-0.65969		-0.823117
	-1.77643		-1.07643		-0.764326		-0.76433		-0.899709
	-1.81005		-1.62005		-0.870051		-0.87005		-1.05143
	-1.50774		-1.41774		-1.04		-1.04		-1.12596
	-1.26564		-1.27564		-0.959687		-0.95969		-1.16352
	-1.59895		-1.40895		-0.976433		-0.97643		-1.2758
	-1.37114		-1.37114		-1.17005		-1.17005		-1.35698
	-1.52326		-1.52326		-1.26774		-1.26774		-1.43226
	-1.46123		-1.52123		-1.32564		-1.32564		-1.48069
	-1.33369		-1.39369		-1.35895		-1.35895		-1.44095
	-1.29786		-1.40786		-1.2626		-1.47114		-1.5
	-1.09964		-1.20964		-1.3579		-1.62326		-1.51013
	-1.2626		-1.3726		-1.19924		-1.62123		-1.56846
	-1.3579		-1.4679		-1.34145		-1.49369		-1.59547
	-1.19924		-1.38924		-1.36345		-1.45786		-1.69507
	-1.34145		-1.53145		-1.44766		-1.25964		-1.70202
	-1.36345		-1.55345		-1.52586		-1.4226		-1.62278
	-1.44766		-1.43001		-1.59529		-1.5179		-1.74253
	-1.52586		-1.44865		-1.60917		-1.43924		-1.74276
	-1.59529		-1.45115		-1.71164		-1.58145		-1.86652
	-1.60917		-1.41671		-1.71234		-1.60345		-1.97447
	-1.71164		-1.48742		-1.81195		-1.73431		-2.10705
	-1.71234		-1.64529		-1.88034		-1.81442		-2.24541
	-1.81195		-1.83167		-1.93621		-1.90592		-2.38136
	-1.88034		-2.01423		-2.00402		-1.9977		-2.49805
	-1.93621		-2.15841		-2.07359		-2.10016		-2.63604
	-2.00402		-2.20866		-2.16272		-2.18826		-2.74934
	-2.07359		-2.31375		-2.27074		-2.28596		-2.86875
	-2.16272		-2.42231		-2.39016		-2.39301		-2.98785
	-2.27074		-2.5518		-2.48841		-2.49231		-3.12435
	-2.39016		-2.66079		-2.62813		-2.615		-3.20965
	-2.48841		-2.77029		-2.71282		-2.73622		-3.29677
	-2.62814		-2.87266		-2.84787		-2.8687		-3.38778
	-2.71282		-2.96916		-2.96909		-2.98549		-3.48483
	-2.84787		-3.06088		-3.08475		-3.09399		-3.57843
	-2.96909		-3.14932		-3.15036		-3.19784		-3.62519
	-3.08475		-3.22854		-3.26805		-3.29339		-3.69263
	-3.15036		-3.29946		-3.37804		-3.38373		-3.7517
	-3.26805		-3.37075		-3.44459		-3.45794		-3.80143
	-3.37804		-3.4316		-3.52213		-3.52828		-3.8096
	-3.44459		-3.4819		-3.59576		-3.5863		-3.8579
	-3.52213		-3.52078		-3.684		-3.63896		-3.88861
	-3.59576		-3.5578		-3.72382		-3.68657		-3.9123
	-3.684		-3.611		-3.78376		-3.73513		-3.91673
	-3.72382		-3.67475		-3.82407		-3.7835		-3.91314
	-3.78376		-3.74436		-3.86248		-3.83887		-3.93963
	-3.82407		-3.8158		-3.90081		-3.89052		-3.95879
	-3.86248		-3.90229		-3.95778		-3.94395		-3.96534
	-3.90081		-3.98127		-3.97488		-3.9987		-3.96807
	-3.95778		-4.06285		-4.1582		-4.05281		-3.97871
	-3.97488		-4.13		-4.20847		-4.10801		-3.9811
	-4.01278		-4.17209		-4.24413		-4.1582		-4.00063
	-4.03327		-4.19501		-4.21134		-4.20848		-3.99876
	-4.07165		-4.22084		-4.22744		-4.24414		-3.97563
	-4.09659		-4.23597		-4.23433		-4.21134		-3.95489
	-4.12006		-4.24274		-4.1881		-4.22744		-3.92351
	-4.16134		-4.23973		-4.13526		-4.23433		-3.87124
	-4.20744		-4.21652		-4.06646		-4.1881		-3.8056
	-4.21433		-4.18558		-3.98253		-4.13526		-3.73818
	-4.23497		-4.15144		-3.87477		-4.06646		-3.64191
	-4.2414		-4.13188		-3.75082		-3.98253		-3.50976
	-4.24256		-4.10919		-3.61575		-3.87477		-3.38858
	-4.22553		-4.04859		-3.47399		-3.75082		-3.24704
	-4.18108		-3.97037		-3.3301		-3.61575		-3.09819
	-4.14235		-3.86939		-3.17144		-3.47399		-2.91066
	-4.06244		-3.73602		-2.99867		-3.3301		-2.75422
	-3.98372		-3.59251		-2.84706		-3.17144		-2.54771
	-3.8824		-3.41462		-2.68099		-2.99867		-2.36346
	-3.76496		-3.20077		-2.50485		-2.84706		-2.12649
	-3.63414		-2.98267		-2.32263		-2.681		-1.94189
	-3.4927		-2.76011		-2.13824		-2.50485		-1.75453
	-3.33393		-2.52447		-1.95159		-2.32263		-1.55855
	-3.14474		-2.28943		-1.7744		-2.13824		-1.34341
	-2.97356		-2.05779		-1.61032		-1.95159		-1.18086
	-2.75422		-1.83603		-1.46262		-1.7744		-1.04258
	-2.5602		-1.61497		-1.33374		-1.61032		-0.794345
	-2.33425		-1.42959		-1.22891		-1.46262		-0.717633
	-2.12744		-1.26878		-1.14599		-1.33374		-0.642577
	-1.89845		-1.1442		-1.0902		-1.22891		-0.640345
	-1.69481		-1.07058		-1.03158		-1.14599		-0.683381
	-1.51411		-1.02928		-0.985359		-1.0902		-0.718778
	-1.31735		-1.00072		-0.949757		-1.03158		-0.78206
	-1.15218		-0.99946		-0.922329		-0.98536		-0.709446
	-1.08329		-0.9145		-0.89882		-0.94976		-0.784661
	-0.9795		-0.94415		-0.89785		-0.92233		-0.713207
	-0.9448		-0.96534				-0.89882		-0.743817
	-0.94146		-0.97056				-0.89785		-0.755749
	-0.92717		-0.94901				-0.89458		-0.764154
	-0.92629		-0.92441				-0.89288		-0.821646
	-0.95723		-0.98274				-0.89326		-0.856818
			-0.94078				-0.89892		-0.871657
			-0.90351				-0.89986		-0.881448
			-0.86443				-0.89388
			-0.82354

## Sheet: Fig5D
	2.5V/nm		2.0V/nm		1.5V/nm		1V/nm
	1.39061		1.37515		1.30222		1.14833

## Sheet: Fig5E
	2.5V/nm		2.0V/nm		1.5V/nm		1V/nm
	1.05088		1.04874		1.01971		1.0134
