# Supplementary material for: Sensory input-dependent gain modulation of the optokinetic nystagmus by mid-infrared stimulation in pigeons
Source: eLife. 2023 Feb 28;12:e78729. doi: 10.7554/eLife.78729 (PMC9977280; doi:10.7554/eLife.78729)
Supplement: Figure 6—figure supplement 1—source data 1. [file elife-78729-fig6-figsupp1-data1.xlsx]

## Sheet: Fig6-S1B
	Preferred
		FWHM (ms)			Spike duration (ms)
		Pre-MIRS	MIRS	Post-MIRS	Pre-MIRS	MIRS	Post-MIRS
		0.135145	0.118484	0.130227	0.244185	0.217197	0.23529
		0.130931	0.12205	0.128321	0.246549	0.207705	0.235707
		0.132041	0.123552	0.132287	0.24992	0.222123	0.246525
		0.136554	0.119569	0.128357	0.240494	0.249744	0.261894
		0.138862	0.118291	0.126973	0.240911	0.226551	0.271543
		0.133224	0.120657	0.12572	0.236559	0.216554	0.241029
		0.129852	0.122273	0.126859	0.244472	0.222794	0.241452
		0.141591	0.116769	0.130858	0.238076	0.231762	0.240709
		0.130469	0.119324	0.131135	0.23738	0.231126	0.238758
		0.139815	0.121839	0.132108	0.248228	0.231344	0.225887
		0.138574	0.127242	0.14033	0.241085	0.21387	0.245272
		0.131713	0.116422	0.135877	0.246994	0.220537	0.242133
		0.133617	0.115695	0.127576	0.249538	0.218948	0.229251
		0.138555	0.119164	0.133914	0.239841	0.220198	0.245912
		0.129868	0.119598	0.133663	0.255333	0.227701	0.23707
		0.131509	0.116668	0.128701	0.244808	0.22985	0.255448
		0.132133	0.12388	0.128926	0.25535	0.235286	0.235623
		0.132417	0.114452	0.130787	0.250849	0.229091	0.240821
		0.129542	0.116608	0.130985	0.253566	0.230258	0.252329
		0.133537	0.123237	0.128973	0.245289	0.245505	0.245942
		0.133423	0.113591	0.13197	0.244748	0.214052	0.231048
		0.141209	0.12253	0.131199	0.239617	0.232547	0.241394
		0.138612	0.122738	0.131977	0.258964	0.242151	0.24829
		0.134459	0.113691	0.126259	0.259569	0.215012	0.251878
		0.135342	0.123753	0.136178	0.24193	0.201866	0.256966
		0.13196	0.118506	0.12912	0.229467	0.229164	0.2485
		0.138815	0.124472	0.12929	0.238048	0.219329	0.261899
		0.132668	0.115232	0.132304	0.239967	0.215174	0.293614
		0.132756	0.12062	0.131972	0.242036	0.233526	0.24027
		0.131392	0.119169	0.135924	0.248187	0.226369	0.248873
		0.131576	0.121465	0.136335	0.240786	0.239548	0.23269
		0.138379	0.118756	0.134668	0.248996	0.232831	0.257364
		0.137591	0.121073	0.134075	0.251314	0.218003	0.256958
		0.14062	0.124771	0.125218	0.238636	0.246518	0.242188
		0.134278	0.120094	0.13304	0.250699	0.21531	0.239165
		0.131051	0.118123	0.126109	0.230647	0.22087	0.234456
		0.134158	0.118795	0.127025	0.262205	0.221159	0.244328
		0.130787	0.125835	0.136167	0.245922	0.231906	0.250799
		0.137709	0.120377	0.131999	0.237516	0.211265	0.26393
		0.136914	0.124824	0.129046	0.236428	0.227018	0.253559
		0.130877	0.128451	0.126558	0.261497	0.21558	0.264014
		0.131564	0.114909	0.126724	0.250099	0.21734	0.24909
		0.132769	0.116993	0.133822	0.253615	0.250557	0.248213
		0.133674	0.122175	0.130933	0.235253	0.229347	0.245965
		0.132136	0.116853	0.13665	0.243352	0.216986	0.254751
		0.133782	0.118374	0.128208	0.254532	0.225895	0.236725
		0.13397	0.120037	0.128196	0.243917	0.231316	0.227265
		0.13102	0.114029	0.129166	0.239536	0.233672	0.238259
		0.133921	0.120942	0.13076	0.239977	0.210391	0.237529
		0.130838	0.124141	0.13405	0.257296	0.222563	0.269048
		0.136234	0.119381	0.130453	0.243846	0.223427	0.241982
		0.131116	0.12248	0.127324	0.251694	0.220864	0.240818
		0.13162	0.116625	0.134089	0.242351	0.223839	0.24307
		0.133359	0.124872	0.126704	0.25401	0.204642	0.229352
		0.130632	0.119933	0.1292	0.257818	0.237516	0.247497
		0.131118	0.120528	0.127131	0.247363	0.240457	0.23754
		0.129511	0.119484	0.128324	0.244328	0.202067	0.255128
		0.133896	0.127483	0.131392	0.239787	0.219599	0.223379
		0.129185	0.124697	0.133115	0.256059	0.279374	0.237461
		0.13507	0.120089	0.129656	0.247601	0.242636	0.245955
		0.13455	0.117577	0.13896	0.253096	0.242745	0.239083
		0.13227	0.119236	0.137098	0.240942	0.247555	0.244372
		0.128794	0.120178	0.128026	0.244446	0.236049	0.274265
		0.136712	0.119341	0.133896	0.248347	0.23409	0.230415
		0.131678	0.123867	0.131192	0.250194	0.260524	0.236253
		0.132221	0.122206	0.131052	0.254505	0.237107	0.22978
		0.133272	0.118622	0.137577	0.238795	0.221792	0.24233
		0.130707	0.115426	0.121992	0.246054	0.247588	0.266463
		0.130792	0.119635	0.132345	0.240297	0.23788	0.257054
		0.131009	0.1194	0.12967	0.243989	0.251371	0.251187
		0.134535	0.117728	0.137161	0.255138	0.234542	0.240027
		0.130722	0.123065	0.12581	0.252114	0.215052	0.244848
		0.143394	0.11536	0.131179	0.254957	0.230938	0.236783
		0.141094	0.125541	0.136138	0.248898	0.241218	0.250236
		0.141742	0.124612	0.126789	0.247827	0.22044	0.235679
		0.134954	0.120861	0.129069	0.248588	0.226043	0.244826
		0.130722	0.117711	0.130953	0.247211	0.221245	0.273902
		0.140658	0.11678	0.131645	0.260864	0.215829	0.225451
		0.13277	0.116325	0.137995	0.243069	0.239715	0.240097
		0.131577	0.120262	0.134929	0.24143	0.222944	0.256782
		0.134583	0.117619	0.12773	0.246724	0.218279	0.233201
		0.134775	0.118439	0.128369	0.248491	0.217514	0.25831
		0.136821	0.117786	0.1274	0.252094	0.216657	0.226353
		0.1345	0.119127	0.135706	0.23237	0.219037	0.228905
		0.139182	0.119055	0.126289	0.246487	0.245292	0.229931
		0.138124	0.118188	0.129433	0.248551	0.199381	0.238995
		0.134604	0.117662	0.128202	0.239245	0.226324	0.239121
		0.135475	0.118759	0.131108	0.250955	0.235149	0.242437
		0.131006	0.122891	0.128747	0.237406	0.235408	0.233299
		0.133739	0.117141	0.128003	0.268447	0.230283	0.245754
		0.13439	0.121907	0.128566	0.25298	0.232834	0.233222
		0.139735	0.119625	0.134549	0.24092	0.219401	0.256402
		0.133805	0.12124	0.13026	0.25782	0.220915	0.269363
		0.139142	0.122955	0.13661	0.24961	0.226595	0.248349
		0.132683	0.126795	0.130322	0.237459	0.231729	0.230441
		0.140037	0.116359	0.138159	0.254128	0.253518	0.245001
		0.135584	0.119104	0.126407	0.246917	0.203301	0.253451
		0.133131	0.121707	0.128218	0.239745	0.246921	0.244516
		0.131355	0.12071	0.13435	0.247319	0.229165	0.262137
		0.132281	0.132759	0.129633	0.242666	0.226464	0.255617
		0.133848	0.118679	0.129123	0.248259	0.231522	0.231889
		0.131375	0.119217	0.133049	0.254576	0.215163	0.250035
		0.131281	0.123522	0.131916	0.27609	0.213245	0.23907
		0.13355	0.12203	0.135165	0.24109	0.222764	0.25276
		0.129931	0.121984	0.125403	0.239554	0.225394	0.258389
		0.132098	0.120284	0.13018	0.263435	0.225934	0.227312
		0.137329	0.118661	0.131811	0.23809	0.226623	0.230312
		0.133055	0.122239	0.126952	0.257076	0.227907	0.250965
		0.131896	0.117772	0.12647	0.257667	0.239375	0.243342
		0.134757	0.117562	0.14018	0.241673	0.218954	0.236433
		0.133264	0.125703	0.1314	0.254299	0.225565	0.249501
		0.13416	0.123029	0.128048	0.24511	0.248679	0.24736
		0.140539	0.11556	0.126801	0.237348	0.226026	0.244947
		0.130415	0.116939	0.127319	0.241618	0.241997	0.240897
		0.13251	0.119202	0.131566	0.255756	0.217163	0.237143
		0.133463	0.11872	0.12817	0.24625	0.213896	0.225708
		0.130639	0.117954	0.126064	0.252016	0.215539	0.242248
		0.132641	0.116841	0.133401	0.255734	0.235368	0.244689
		0.135372	0.120425	0.130553	0.250601	0.223538	0.270795
		0.135048	0.113664	0.128662	0.255921	0.209215	0.240056
		0.130749	0.120848	0.13969	0.245134	0.238693	0.245637
		0.140667	0.128456	0.130907	0.249829	0.242716	0.260401
		0.134254	0.122262	0.12698	0.230651	0.228715	0.255559
		0.137284	0.117974	0.129009	0.251253	0.231858	0.25513
		0.13757	0.116541	0.126724	0.259749	0.212886	0.243876
		0.138825	0.121621	0.132448	0.241532	0.221248	0.227555
		0.139981	0.124066	0.129279	0.239701	0.235011	0.233983
		0.130605	0.118273	0.128564	0.242855	0.235987	0.225369
		0.133928	0.120134	0.129056	0.252228	0.226878	0.261022
		0.134826	0.116862	0.135867	0.231913	0.230168	0.235183
		0.131739	0.12074	0.125808	0.258125	0.235215	0.236216
		0.135585	0.124477	0.128254	0.234171	0.233629	0.2488
		0.133706	0.116689	0.136425	0.239101	0.208757	0.239645
		0.140711	0.124273	0.122906	0.259124	0.225108	0.244121
		0.127672	0.121768	0.131228	0.259433	0.23001	0.22856
		0.133665	0.119935	0.124436	0.246467	0.214051	0.26297
		0.129491	0.119399	0.128624	0.245312	0.242726	0.236107
		0.131216	0.116787	0.130307	0.235576	0.220924	0.23229
		0.131639	0.121237	0.129658	0.242269	0.235305	0.2501
		0.132397	0.123599	0.130665	0.234746	0.232174	0.227836
		0.137691	0.117197	0.131694	0.252564	0.231231	0.239335
		0.135415	0.118503	0.128684	0.241563	0.215232	0.255397
		0.131224	0.119184	0.134549	0.252117	0.212741	0.245508
		0.134193	0.120838	0.133287	0.248285	0.229135	0.251286
		0.134097	0.121363	0.133864	0.231889	0.218056	0.240483
		0.130039	0.119549	0.129771	0.238807	0.244247	0.228469
		0.131796	0.117993	0.127714	0.2496	0.215349	0.263948
		0.136161	0.11956	0.138254	0.240635	0.226428	0.274055
		0.131481	0.118459	0.128577	0.236231	0.223611	0.219413
		0.131612	0.123203	0.13368	0.244039	0.223315	0.245227
		0.131438	0.116325	0.133515	0.254494	0.20711	0.232243
		0.134117	0.117287	0.135282	0.248383	0.237106	0.252597
		0.12906	0.119075	0.130295	0.246867	0.228251	0.235936
		0.134707	0.129202	0.130402	0.244381	0.280879	0.232795
		0.13039	0.119956	0.131044	0.239866	0.224121	0.241145
		0.130174	0.124163	0.132037	0.256082	0.218591	0.23019
		0.13249	0.119487	0.135048	0.24875	0.216428	0.256282
		0.13157	0.118534	0.130611	0.243341	0.226861	0.244552
		0.13185	0.119413	0.132025	0.256035	0.223438	0.263234
		0.131117	0.116664	0.128388	0.253849	0.230854	0.224604
		0.132718	0.116247	0.136067	0.241363	0.222724	0.272772
		0.129479	0.120762	0.136159	0.249387	0.230957	0.241822
		0.139405	0.119593	0.127384	0.253292	0.205794	0.249808
		0.142312	0.119161	0.133194	0.236066	0.228669	0.260617
		0.132637	0.115371	0.128223	0.236102	0.225908	0.257329
		0.134899	0.124272	0.131578	0.238242	0.247336	0.235752
		0.135782	0.118762	0.138826	0.241888	0.229496	0.236224
		0.141602	0.118705	0.133161	0.251157	0.223665	0.262525
		0.138568	0.120148	0.134583	0.245487	0.230084	0.228122
		0.13837	0.118813	0.134353	0.256712	0.213671	0.242368
		0.135807	0.125121	0.1259	0.249538	0.215843	0.237277
		0.138123	0.116462	0.12999	0.238173	0.237334	0.245035
		0.138503	0.114817	0.132721	0.244576	0.226554	0.239855
		0.130774	0.115662	0.126363	0.248545	0.22265	0.247399
		0.131614	0.118498	0.12927	0.251149	0.219323	0.243581
		0.13708	0.121441	0.132801	0.239532	0.208441	0.24544
		0.132158	0.119044	0.130902	0.250881	0.227285	0.262456
		0.130219	0.118976	0.126179	0.243012	0.222633	0.235414
		0.136722	0.126679	0.132747	0.246765	0.225909	0.262627
		0.13271	0.11743	0.131392	0.247096	0.213858	0.259959
		0.135191	0.117049	0.137465	0.25184	0.239952	0.236732
		0.136343	0.129502	0.13619	0.250937	0.233992	0.251857
		0.141656	0.118024	0.124641	0.248296	0.229575	0.256947
		0.129903	0.119694	0.128734	0.265888	0.222731	0.235083
		0.133442	0.122433	0.129259	0.237837	0.225274	0.24386
		0.132942	0.12335	0.129751	0.245296	0.219632	0.243996
		0.133031	0.119746	0.12836	0.2466	0.21673	0.237684
		0.135088	0.117559	0.129273	0.262217	0.240187	0.240188
		0.13377	0.119021	0.133734	0.245255	0.217604	0.237905
		0.133429	0.123923	0.132121	0.243288	0.228875	0.252698
		0.136323	0.116322	0.132511	0.246282	0.218957	0.230052
		0.137368	0.118594	0.129463	0.246246	0.225834	0.246792
		0.130773	0.12157	0.131302	0.238124	0.220202	0.244448
		0.135508	0.113168	0.127628	0.268372	0.215995	0.247528
		0.140022	0.122739	0.123897	0.249979	0.222442	0.22602
		0.134391	0.123378	0.131267	0.245177	0.222794	0.226748
		0.131143	0.115503	0.130283	0.247403	0.233117	0.23916
		0.137446	0.123688	0.134678	0.23474	0.23773	0.249942
		0.14022	0.120343	0.127765	0.249226	0.233563	0.217645
		0.13796	0.116278	0.135607	0.246048	0.239322	0.26049
		0.134413	0.11862	0.137597	0.238491	0.229476	0.258587
		0.141297	0.124625	0.131434	0.237523	0.234603	0.253736
		0.13715	0.119104	0.131455	0.250509	0.223366	0.255986
		0.130204	0.122245	0.131396	0.24947	0.211785	0.249978
		0.135099	0.119412	0.134851	0.239708	0.212082	0.226237
		0.133337	0.120221	0.130859	0.2366	0.246128	0.269163
		0.131674	0.121989	0.130986	0.256264	0.243765	0.246306
		0.127342	0.120432	0.133646	0.250502	0.239738	0.233608
		0.1332	0.119963	0.124572	0.23855	0.227431	0.241343
		0.135568	0.11878	0.126765	0.251299	0.238375	0.262079
		0.137884	0.126101	0.129163	0.244684	0.231284	0.259061
		0.132041	0.118892	0.128427	0.246948	0.216489	0.247946
		0.130819	0.123211	0.130765	0.237637	0.207713	0.254687
		0.13449	0.119991	0.135199	0.241976	0.242214	0.236881
		0.139142	0.11799	0.130898	0.236485	0.236543	0.243768
		0.133911	0.126256	0.135322	0.241764	0.240757	0.241763
		0.132785	0.119008	0.134863	0.24555	0.211393	0.237832
		0.131323	0.115118	0.13065	0.231889	0.228295	0.247515
		0.133423	0.119716	0.137212	0.251372	0.219653	0.256541
		0.131746	0.117842	0.131971	0.26689	0.224257	0.241225
		0.141762	0.119675	0.126959	0.251112	0.221696	0.25121
		0.133811	0.122038	0.130531	0.249528	0.20416	0.258697
		0.136955	0.123239	0.126683	0.251639	0.225772	0.23924
		0.136211	0.122815	0.130955	0.257622	0.239603	0.241175
		0.131566	0.120969	0.126269	0.268392	0.219345	0.263055
		0.137547	0.119405	0.126557	0.252117	0.235607	0.242006
		0.13717	0.116583	0.128752	0.246091	0.221573	0.24887
		0.139072	0.119678	0.127142	0.242574	0.213304	0.250045
		0.130814	0.123171	0.135388	0.261241	0.216787	0.230257
		0.13131	0.119546	0.131966	0.26781	0.235587	0.234921
		0.136891	0.124139	0.132326	0.251795	0.234002	0.246591
		0.130585	0.122585	0.138022	0.248855	0.2171	0.231301
		0.137282	0.115902	0.131248	0.245546	0.234402	0.2406
		0.132202	0.119405	0.132406	0.231711	0.228342	0.23239
		0.133712	0.125586	0.125404	0.243162	0.209772	0.258667
		0.134673	0.11849	0.124452	0.264599	0.216648	0.247787
		0.136101	0.118494	0.126017	0.254086	0.239232	0.25379
		0.130885	0.130044	0.135312	0.242976	0.231789	0.233752
		0.135548	0.121798	0.12856	0.251565	0.219594	0.278845
		0.132611	0.12019	0.127345	0.247746	0.257363	0.237553
		0.132961	0.115203	0.130036	0.246185	0.233882	0.242324
		0.132424	0.123279	0.130767	0.26228	0.23269	0.240744
		0.133438	0.120837	0.128684	0.24289	0.234163	0.23779
		0.139381	0.116051	0.12808	0.254231	0.236542	0.237602
		0.133485	0.118969	0.129273	0.247922	0.230276	0.252913
		0.138383	0.12289	0.127431	0.256444	0.243947	0.250646
		0.135198	0.1162	0.130537	0.240173	0.22503	0.236483
		0.131442	0.120633	0.130695	0.231028	0.224151	0.236687
		0.130637	0.121965	0.129676	0.248432	0.234192	0.242881
		0.132575	0.127644	0.131494	0.229867	0.216741	0.24329
		0.135491	0.121737	0.13114	0.246789	0.229531	0.249697
		0.129957	0.118257	0.133527	0.24805	0.225614	0.24978
		0.138743	0.117729	0.134319	0.243433	0.225491	0.307283
		0.136654	0.119417	0.126338	0.246541	0.242435	0.234613
		0.131641	0.119654	0.130225	0.255918	0.239164	0.232029
		0.131149	0.127048	0.137068	0.236361	0.219537	0.243079
		0.135136	0.133514	0.131829	0.234785	0.245504	0.250649
		0.139004	0.115513	0.131772	0.238452	0.218741	0.232848
		0.139045	0.120071	0.126382	0.249786	0.218269	0.234749
		0.129629	0.119201	0.127221	0.258504	0.230916	0.236702
		0.132833	0.117405	0.137311	0.249996	0.214999	0.234837
		0.137744	0.122454	0.137048	0.241267	0.243966	0.237339
		0.134042	0.117662	0.126148	0.254961	0.227353	0.24732
		0.131637	0.118593	0.126542	0.240515	0.222226	0.240303
		0.133073	0.121908	0.127855	0.25069	0.205082	0.248583
		0.131348	0.118815	0.135129	0.257543	0.22619	0.239596
		0.133561	0.124344	0.126264	0.245375	0.219164	0.216603
		0.13406	0.122805	0.138856	0.227229	0.218986	0.264997
		0.137518	0.126351	0.127951	0.241772	0.231281	0.241382
		0.133852	0.117776	0.132323	0.229037	0.211657	0.23062
		0.132237	0.120503	0.129001	0.243837	0.218508	0.234263
		0.132508	0.119244	0.129668	0.235412	0.220414	0.234426
		0.136214	0.128635	0.133659	0.234613	0.213013	0.236071
		0.137804	0.124866	0.133287	0.239761	0.209302	0.23604
		0.131164	0.118671	0.127012	0.242337	0.217869	0.261703
		0.139382	0.118013	0.130818	0.236662	0.222073	0.261902
		0.142285	0.115412	0.131441	0.259889	0.198881	0.26138
		0.137101	0.118664	0.132397	0.240207	0.215779	0.255719
		0.134798	0.120447	0.13522	0.252407	0.228627	0.241325
		0.133983	0.117089	0.12951	0.240225	0.201972	0.241005
		0.130382	0.118533	0.128254	0.243243	0.217571	0.23655
		0.136382	0.122105	0.127777	0.25949	0.220186	0.233137
		0.132198	0.127101	0.129163	0.238187	0.214868	0.236608
		0.130163	0.117611	0.129438	0.229653	0.247986	0.248269
		0.13753	0.124732	0.130621	0.256823	0.220708	0.250755
		0.139658	0.123444	0.13201	0.232945	0.227765	0.254844
		0.13702	0.119978	0.125323	0.254543	0.22854	0.242866
		0.139069	0.117957	0.136444	0.252612	0.252437	0.233569
		0.138389	0.119381	0.128729	0.251356	0.227453	0.251545
		0.132121	0.117615	0.126269	0.240646	0.216216	0.234847
		0.135409	0.118807	0.129883	0.248566	0.226609	0.238815
		0.13598	0.119951	0.128228	0.236372	0.222114	0.227487
		0.134906	0.117529	0.135816	0.254883	0.212883	0.231876
		0.130629	0.118581	0.137344	0.247198	0.255736	0.240257
		0.129945	0.118612	0.136183	0.244783	0.216885	0.228429
		0.136655	0.120859	0.135181	0.245617	0.24023	0.243042
		0.13232	0.119623	0.132052	0.242136	0.2097	0.24563
		0.130616	0.118532	0.127512	0.238708	0.242003	0.260255
		0.132616	0.12753	0.127853	0.259007	0.213132	0.234858
		0.141724	0.116673	0.125541	0.268571	0.218389	0.238984
		0.131137	0.120683	0.126908	0.244421	0.221719	0.232801
		0.137883	0.119136	0.137233	0.249066	0.240939	0.253705
		0.140784	0.124814	0.134686	0.236154	0.223399	0.23602
		0.137146	0.12179	0.125299	0.246675	0.219374	0.236214
		0.136249	0.119599	0.128055	0.241263	0.241683	0.238309
		0.133221	0.115175	0.129019	0.25144	0.226928	0.236322
		0.134815	0.118914	0.130213	0.228311	0.228765	0.241781
		0.130358	0.121207	0.132607	0.24533	0.212646	0.247311
		0.131352	0.114877	0.133608	0.24195	0.203295	0.247282
		0.141113	0.116303	0.125695	0.260786	0.228176	0.265435
		0.133331	0.122443	0.137175	0.257701	0.215029	0.223914
		0.132857	0.12159	0.129204	0.248492	0.208248	0.261643
		0.137337	0.119143	0.12949	0.250864	0.212191	0.261293
		0.130685	0.124603	0.128375	0.241381	0.231139	0.240735
		0.137207	0.120927	0.13015	0.24397	0.232127	0.258516
		0.135905	0.124818	0.133534	0.241711	0.215995	0.229733
		0.131832	0.121822	0.126	0.247797	0.212944	0.252438
		0.134996	0.120148	0.130501	0.242219	0.226879	0.229926
		0.134064	0.124835	0.126527	0.262953	0.2676	0.248376
		0.132458	0.121003	0.134614	0.261477	0.251405	0.250452
		0.134916	0.123219	0.130025	0.242853	0.264815	0.240055
		0.137598	0.115696	0.131931	0.248889	0.224338	0.255069
		0.137419	0.121508	0.133551	0.240638	0.206839	0.253319
		0.133919	0.118932	0.135771	0.237696	0.23322	0.25361
		0.136264	0.121828	0.130698	0.236029	0.224608	0.229011
		0.139993	0.117554	0.127626	0.245096	0.216211	0.228717
		0.129326	0.122036	0.124731	0.242088	0.220374	0.229589
		0.137592	0.116439	0.129054	0.236808	0.237688	0.230674
		0.13177	0.123845	0.130901	0.252008	0.219689	0.238518
		0.134689	0.116947	0.136696	0.244808	0.212319	0.272541
		0.139788	0.121559	0.136059	0.242926	0.23282	0.248036
		0.138789	0.12003	0.132409	0.241001	0.25211	0.244336
		0.131282	0.118558	0.135371	0.248424	0.212486	0.249588
		0.132423	0.12049	0.130762	0.249617	0.221989	0.243941
		0.131555	0.116018	0.128192	0.255811	0.248289	0.234303
		0.130312	0.121137	0.137708	0.247224	0.240658	0.240311
		0.138702	0.117039	0.129095	0.256635	0.22041	0.26099
		0.131416	0.123806	0.13122	0.244009	0.217289	0.255943
		0.139028	0.117759	0.125837	0.241514	0.229995	0.243825
		0.138675	0.126533	0.129186	0.242684	0.224349	0.245475
		0.137283	0.116188	0.127092	0.241496	0.244428	0.256002
		0.139581	0.115975	0.129436	0.255177	0.213759	0.230598
		0.133129	0.115356	0.133103	0.239677	0.217778	0.248164
		0.131608	0.122425	0.133691	0.242946	0.246902	0.252273
		0.132088	0.121114	0.138891	0.241565	0.210064	0.230811
		0.134563	0.129541	0.131647	0.254023	0.224365	0.238126
		0.136561	0.118486	0.127255	0.24823	0.229627	0.242995
		0.130078	0.118143	0.126512	0.246869	0.214913	0.232081
		0.130176	0.120715	0.129124	0.241598	0.216523	0.256953
		0.13894	0.126437	0.129978	0.239033	0.206193	0.24653
		0.139781	0.125578	0.130569	0.248358	0.202649	0.238024
		0.136956	0.12862	0.136012	0.250892	0.220821	0.245466
		0.133889	0.124701	0.131751	0.241443	0.237507	0.255673
		0.136721	0.117562	0.138179	0.261476	0.207751	0.242051
		0.131354	0.125305	0.128162	0.238806	0.219607	0.231833
		0.1397	0.116247	0.12792	0.248593	0.223261	0.263739
		0.130907	0.120619	0.130579	0.255353	0.224498	0.253063
		0.140473	0.123394	0.131692	0.238615	0.228506	0.263222
		0.139793	0.117968	0.126182	0.256594	0.233196	0.25381
		0.138035	0.135154	0.129641	0.26063	0.22735	0.238096
		0.131858	0.118548	0.130274	0.274557	0.233864	0.24672
		0.138162	0.119457	0.127899	0.232331	0.214746	0.218903
		0.140438	0.119298	0.133153	0.258387	0.223453	0.257809
		0.136151	0.121889	0.131663	0.238256	0.216096	0.250461
		0.133814	0.120644	0.137482	0.256833	0.229621	0.274431
		0.131589	0.124147	0.126807	0.245264	0.238058	0.24198
		0.137318	0.120458	0.133255	0.253811	0.222891	0.239284
		0.132103	0.11751	0.131634	0.244024	0.223076	0.250203
		0.134043	0.119629	0.136754	0.242029	0.231797	0.24355
		0.131611	0.123124	0.130889	0.25091	0.27417	0.254592
		0.13292	0.118991	0.126024	0.237024	0.210433	0.237884
		0.129758	0.125654	0.13	0.252782	0.218936	0.267579
		0.136881	0.116833	0.132864	0.250151	0.233815	0.222501
		0.133002	0.116886	0.126545	0.231329	0.226588	0.242852
		0.140761	0.118354	0.132489	0.244246	0.228572	0.249805
		0.130648	0.118872	0.137147	0.258353	0.24955	0.246976
		0.133338	0.119454	0.135846	0.246596	0.212593	0.240155
		0.136685	0.12071	0.132311	0.253181	0.210527	0.227648
		0.135236	0.119985	0.126253	0.263782	0.215461	0.240829
		0.132885	0.123361	0.126811	0.241639	0.219934	0.255082
		0.131768	0.120762	0.130253	0.244666	0.228737	0.250369
		0.136126	0.117492	0.131946	0.236878	0.229392	0.257507
		0.140289	0.124021	0.130617	0.248929	0.240576	0.221022
		0.133287	0.118174	0.137881	0.242473	0.22145	0.236809
		0.129642	0.12233	0.134062	0.240506	0.219107	0.240177
		0.137577	0.118585	0.135399	0.248576	0.227402	0.232038
		0.130404	0.118766	0.129859	0.249377	0.261329	0.240264
		0.136283	0.118368	0.131077	0.244852	0.228818	0.237877
		0.133154	0.120206	0.133413	0.239702	0.23443	0.271341

## Sheet: Fig6-S1C
	Preferred
		FWHM (ms)
		Pre-MIRS	MIRS	Post-MIRS
		0.126238	0.121011	0.140373
		0.155413	0.152174	0.16544
		0.116608	0.108143	0.115339
		0.11836	0.11274	0.116449
		0.151724	0.151282	0.150863
		0.143108	0.133795	0.134577
		0.16622	0.168886	0.167779
		0.165229	0.167615	0.15506
		0.214952	0.219037	0.220857
		0.133526	0.120635	0.130188
		0.167935	0.143045	0.160034
		0.142233	0.143821	0.153689
		0.153531	0.15418	0.151648
		0.176219	0.166188	0.170005
		0.140325	0.130146	0.131952
		0.158721	0.155052	0.156882
		0.182876	0.187667	0.188288
		0.224699	0.198562	0.248805
		0.132078	0.135263	0.139437
		0.167249	0.165199	0.169916
		0.192503	0.195012	0.197501
		0.114056	0.115402	0.114646
		0.183465	0.171629	0.171373
		0.112479	0.10943	0.111116
		0.135284	0.118323	0.125124
		0.141873	0.141167	0.145681
		0.182196	0.174463	0.1764
		0.198159	0.20565	0.205167

## Sheet: Fig6-S1D
	Preferred
		Spike duration (ms)
		Pre-MIRS	MIRS	Post-MIRS
		0.216055	0.212985	0.200467
		0.290342	0.275402	0.336616
		0.197908	0.184176	0.192782
		0.188757	0.182208	0.19047
		0.259969	0.260324	0.259174
		0.290073	0.301901	0.369976
		0.293694	0.283094	0.29284
		0.282675	0.282722	0.286467
		0.301992	0.271872	0.263025
		0.295859	0.268517	0.294581
		0.262903	0.224537	0.27888
		0.229259	0.240359	0.251761
		0.311017	0.318715	0.306646
		0.322972	0.284119	0.306269
		0.258842	0.243333	0.251295
		0.277709	0.274314	0.269836
		0.318443	0.317835	0.327089
		0.308884	0.254918	0.330068
		0.157391	0.164509	0.168115
		0.169425	0.166938	0.173122
		0.258309	0.261539	0.267878
		0.169259	0.172232	0.169964
		0.242587	0.229199	0.231433
		0.126905	0.124422	0.125716
		0.170501	0.157388	0.165309
		0.168648	0.166607	0.170907
		0.260001	0.24916	0.258926
		0.280583	0.281313	0.282619

## Sheet: Fig6-S1F
	Null
		FWHM (ms)			Spike duration (ms)
		Pre-MIRS	MIRS	Post-MIRS	Pre-MIRS	MIRS	Post-MIRS
		0.124251	0.115206	0.126259	0.280172	0.224809	0.240228
		0.122616	0.112715	0.125539	0.273598	0.232258	0.236257
		0.121706	0.115471	0.124785	0.244787	0.230899	0.243442
		0.124418	0.115385	0.131328	0.24572	0.216551	0.230009
		0.118923	0.115983	0.123619	0.24818	0.234655	0.237807
		0.13023	0.114113	0.125684	0.262519	0.246112	0.244245
		0.123611	0.114507	0.12403	0.266293	0.234381	0.230503
		0.119471	0.119142	0.124873	0.246955	0.229012	0.227346
		0.121618	0.11133	0.122818	0.23723	0.24201	0.228267
		0.122039	0.112887	0.123495	0.248308	0.235946	0.243123
		0.125427	0.117811	0.12439	0.245148	0.229909	0.246423
		0.126305	0.115661	0.125446	0.243413	0.230176	0.238521
		0.121675	0.115708	0.126419	0.243848	0.221617	0.251139
		0.12253	0.1168	0.122179	0.243172	0.228333	0.25125
		0.120738	0.113127	0.123924	0.278572	0.229714	0.252789
		0.128134	0.117366	0.128891	0.251709	0.221472	0.253857
		0.119537	0.117445	0.13284	0.255046	0.219688	0.233032
		0.12356	0.120441	0.132799	0.266157	0.254323	0.236464
		0.12542	0.115809	0.125157	0.248086	0.221233	0.240642
		0.119332	0.111982	0.130079	0.239328	0.234779	0.227238
		0.121171	0.116711	0.127945	0.264875	0.228213	0.249268
		0.123639	0.111951	0.120124	0.250763	0.197593	0.243582
		0.12143	0.113525	0.129485	0.260629	0.249621	0.230191
		0.117719	0.111918	0.128619	0.239246	0.244316	0.249964
		0.117276	0.115111	0.126386	0.244252	0.229003	0.23339
		0.118636	0.111853	0.125799	0.263487	0.228847	0.22848
		0.124882	0.115656	0.119901	0.248078	0.255574	0.23168
		0.122733	0.116299	0.126227	0.253187	0.244514	0.229042
		0.128199	0.11858	0.117969	0.249304	0.235866	0.248791
		0.120951	0.110126	0.130698	0.24089	0.232835	0.233536
		0.126173	0.112011	0.126279	0.22911	0.231735	0.236585
		0.120306	0.112623	0.124048	0.272264	0.244941	0.241683
		0.118806	0.11406	0.118762	0.258048	0.259232	0.22111
		0.132836	0.125406	0.122934	0.229388	0.225214	0.234427
		0.123633	0.111906	0.126305	0.247309	0.207706	0.24082
		0.116645	0.111796	0.124804	0.256248	0.236695	0.227399
		0.12782	0.11637	0.135174	0.251004	0.244425	0.257423
		0.124026	0.119219	0.128107	0.238401	0.213376	0.263305
		0.115663	0.111293	0.126775	0.261565	0.238876	0.243412
		0.117604	0.114146	0.123804	0.251073	0.20324	0.221812
		0.129775	0.118709	0.131526	0.231025	0.219564	0.240308
		0.120505	0.111555	0.124957	0.241634	0.255078	0.256285
		0.116001	0.11643	0.125576	0.238993	0.223506	0.230215
		0.129845	0.112996	0.120997	0.259596	0.213912	0.241201
		0.121111	0.112651	0.124154	0.247451	0.238478	0.21772
		0.124189	0.11569	0.124647	0.253461	0.252826	0.246168
		0.117791	0.117119	0.13277	0.242154	0.221531	0.217109
		0.125692	0.115969	0.123172	0.253121	0.229527	0.247423
		0.118043	0.114801	0.127428	0.249019	0.222255	0.232068
		0.120671	0.113116	0.132731	0.231164	0.217353	0.234716
		0.121179	0.12029	0.124988	0.236652	0.231516	0.267246
		0.122076	0.116911	0.127678	0.240173	0.229002	0.224589
		0.131671	0.11375	0.121766	0.239831	0.228245	0.227861
		0.123654	0.120429	0.122968	0.252083	0.22163	0.233399
		0.123408	0.113265	0.125749	0.262416	0.217259	0.240473
		0.121116	0.116646	0.124997	0.257126	0.241065	0.236644
		0.125489	0.121461	0.124144	0.229625	0.249294	0.237638
		0.119145	0.112341	0.122824	0.225914	0.214303	0.247333
		0.117647	0.117189	0.122525	0.241186	0.209847	0.231449
		0.120928	0.118316	0.127248	0.244745	0.228598	0.23668
		0.130668	0.119525	0.128662	0.226854	0.241712	0.238134
		0.120478	0.119088	0.12294	0.247526	0.231437	0.261848
		0.127448	0.114724	0.130763	0.250383	0.227817	0.228924
		0.124159	0.115121	0.127722	0.23705	0.242638	0.22938
		0.125086	0.111509	0.128127	0.245489	0.223873	0.237654
		0.125894	0.120943	0.12813	0.252988	0.213932	0.239505
		0.122011	0.117185	0.12724	0.266107	0.215435	0.227809
		0.127304	0.114661	0.12289	0.240106	0.228503	0.228037
		0.121921	0.110969	0.121769	0.249136	0.239127	0.228884
		0.130832	0.117779	0.125771	0.234612	0.230776	0.226215
		0.123968	0.109531	0.125245	0.243735	0.216059	0.22971
		0.12095	0.11709	0.12068	0.262808	0.223647	0.247933
		0.121627	0.112577	0.123726	0.248485	0.223893	0.244812
		0.121335	0.11561	0.120571	0.237989	0.230755	0.220808
		0.119824	0.115724	0.125856	0.239374	0.248312	0.240838
		0.120611	0.116821	0.123282	0.252178	0.212325	0.266193
		0.120835	0.116658	0.1253	0.243661	0.22677	0.253912
		0.12826	0.116165	0.125129	0.242579	0.221186	0.246407
		0.121295	0.107088	0.118694	0.26185	0.228457	0.246248
		0.12419	0.120068	0.124549	0.295717	0.20752	0.239041
		0.119888	0.11678	0.12559	0.278089	0.213051	0.230508
		0.120228	0.114132	0.128114	0.250432	0.230549	0.221431
		0.121635	0.118332	0.129709	0.239615	0.215875	0.240812
		0.120336	0.121277	0.131579	0.232106	0.23028	0.229413
		0.119933	0.119895	0.123375	0.25275	0.292732	0.247715
		0.12277	0.115239	0.126042	0.267584	0.250099	0.234685
		0.125144	0.114319	0.12404	0.237876	0.218585	0.23666
		0.123593	0.111387	0.118346	0.236473	0.21899	0.255469
		0.120382	0.111918	0.119665	0.246458	0.237933	0.229998
		0.129226	0.116719	0.123062	0.244254	0.223883	0.247822
		0.115885	0.123212	0.128468	0.243618	0.217522	0.281988
		0.117371	0.123249	0.125257	0.279743	0.247506	0.229217
		0.122197	0.113363	0.12295	0.24912	0.235815	0.235675
		0.121015	0.113407	0.126159	0.236185	0.231652	0.240569
		0.12317	0.11938	0.130496	0.265833	0.246908	0.241374
		0.125071	0.115904	0.130396	0.227413	0.220124	0.238015
		0.120427	0.114812	0.132336	0.225714	0.24672	0.27036
		0.130306	0.114889	0.134498	0.245541	0.243775	0.259149
		0.120775	0.111926	0.131811	0.263089	0.224872	0.227973
		0.124902	0.113245	0.129908	0.262039	0.218804	0.237017
		0.124634	0.115064	0.130553	0.264444	0.224436	0.23812
		0.119491	0.113609	0.127516	0.237102	0.236615	0.218775
		0.120495	0.113857	0.128206	0.233797	0.222753	0.239443
		0.118579	0.1246	0.126745	0.265476	0.236902	0.249886
		0.121187	0.116878	0.125514	0.245199	0.2373	0.250037
		0.120539	0.113311	0.130215	0.240699	0.209739	0.23306
		0.122817	0.118102	0.123026	0.217	0.232987	0.234653
		0.129215	0.114997	0.123678	0.238524	0.264551	0.219053
		0.130703	0.12204	0.123831	0.248624	0.255132	0.235241
		0.116126	0.113694	0.120652	0.266843	0.224408	0.231553
		0.123322	0.116267	0.126604	0.27885	0.230655	0.250201
		0.123222	0.115062	0.125269	0.246294	0.232216	0.240649
		0.123461	0.118345	0.126921	0.240361	0.219559	0.244756
		0.123884	0.118672	0.128386	0.256178	0.217738	0.269315
		0.124101	0.115273	0.125253	0.249878	0.265538	0.232953
		0.122901	0.114027	0.126053	0.257432	0.223279	0.233544
		0.12695	0.11563	0.125039	0.233471	0.229813	0.249607
		0.12272	0.121267	0.123135	0.241802	0.240893	0.241964
		0.118505	0.115721	0.122946	0.24694	0.229529	0.238521
		0.117885	0.114524	0.124189	0.245148	0.227759	0.256144
		0.118503	0.115083	0.123902	0.254804	0.219504	0.251024
		0.1196	0.117409	0.121699	0.243221	0.234174	0.242078
		0.116864	0.116375	0.122751	0.283712	0.212317	0.242831
		0.127386	0.118305	0.131542	0.248504	0.229891	0.247088
		0.12131	0.118227	0.122325	0.234959	0.24988	0.226471
		0.129691	0.115743	0.123682	0.228963	0.219344	0.239746
		0.122936	0.114928	0.123515	0.239093	0.223085	0.212484
		0.116883	0.117413	0.131156	0.244142	0.221803	0.232821
		0.122912	0.113809	0.120309	0.238153	0.231121	0.244353
		0.125887	0.110126	0.125252	0.26573	0.223054	0.248475
		0.119686	0.119841	0.122221	0.23551	0.213416	0.251321
		0.123876	0.113478	0.123136	0.258298	0.234217	0.241398
		0.124946	0.111915	0.121304	0.235262	0.24094	0.228237
		0.123579	0.120008	0.132445	0.258279	0.244411	0.249729
		0.119324	0.121106	0.121873	0.246007	0.236507	0.259601
		0.126553	0.117373	0.129638	0.227415	0.218704	0.258262
		0.121424	0.1154	0.130987	0.253853	0.25184	0.24798
		0.122866	0.114923	0.122041	0.253648	0.242859	0.237067
		0.121536	0.116276	0.123211	0.258556	0.24106	0.235166
		0.123375	0.12933	0.1185	0.227244	0.229428	0.230734
		0.118226	0.114604	0.132232	0.237652	0.236075	0.237667
		0.119895	0.110415	0.131828	0.278288	0.236141	0.236816
		0.122187	0.117782	0.130149	0.244929	0.224486	0.226841
		0.123354	0.120799	0.125549	0.242731	0.202687	0.262478
		0.115925	0.120527	0.125496	0.242686	0.227491	0.226327
		0.123035	0.115162	0.124442	0.263639	0.219621	0.22059
		0.121796	0.114564	0.12058	0.229761	0.221479	0.251027
		0.119397	0.113675	0.126538	0.241881	0.211614	0.224259
		0.127758	0.113048	0.125116	0.253523	0.240156	0.23707
		0.125734	0.115451	0.120569	0.230704	0.214329	0.242071
		0.129943	0.112635	0.128678	0.254604	0.220194	0.238774
		0.119094	0.111319	0.120962	0.242277	0.227628	0.246862
		0.123139	0.118269	0.125103	0.235839	0.26092	0.233043
		0.124709	0.116591	0.127201	0.240277	0.251228	0.260977
		0.117602	0.116698	0.12589	0.26996	0.255293	0.234778
		0.124039	0.119135	0.127728	0.247193	0.259299	0.249694
		0.121742	0.116455	0.122528	0.240134	0.228868	0.244594
		0.121607	0.114812	0.128565	0.258872	0.226136	0.245371
		0.12315	0.112572	0.129082	0.256031	0.22846	0.225808
		0.115501	0.118608	0.123846	0.257154	0.229943	0.234981
		0.125776	0.117813	0.124799	0.256446	0.223726	0.251745
		0.128701	0.114326	0.124708	0.240664	0.219705	0.24535
		0.119246	0.116588	0.132105	0.252071	0.219599	0.243445
		0.122079	0.117352	0.128592	0.244644	0.225834	0.24137
		0.123834	0.121595	0.129907	0.238931	0.276927	0.254437
		0.126229	0.117546	0.133881	0.235315	0.241709	0.243934
		0.130584	0.115155	0.126986	0.242882	0.208386	0.22712
		0.119178	0.11746	0.123701	0.261153	0.226931	0.230118
		0.129492	0.12503	0.123307	0.241871	0.236405	0.234286
		0.120764	0.114265	0.12385	0.248372	0.247486	0.242781
		0.122058	0.117984	0.129999	0.230143	0.227075	0.238527
		0.119421	0.118875	0.133307	0.225489	0.23742	0.237391
		0.119471	0.116404	0.129864	0.248681	0.229323	0.249393
		0.119324	0.115183	0.125339	0.234428	0.225701	0.226685
		0.121118	0.109121	0.123492	0.249188	0.235028	0.248697
		0.122739	0.114477	0.125098	0.24585	0.232232	0.250181
		0.122823	0.118585	0.121182	0.230388	0.237824	0.245062
		0.118932	0.111208	0.124211	0.255217	0.242397	0.260468
		0.120458	0.114154	0.118859	0.245009	0.231975	0.234074
		0.128738	0.112383	0.124705	0.253422	0.226896	0.230069
		0.119941	0.11194	0.122666	0.262472	0.240762	0.230423
		0.116283	0.116706	0.126903	0.255804	0.218278	0.24644
		0.117992	0.117623	0.123235	0.241976	0.233967	0.242825
		0.120098	0.117383	0.121757	0.245909	0.243743	0.243074
		0.122578	0.116805	0.123967	0.243585	0.237365	0.244045
		0.119424	0.112211	0.130606	0.228736	0.237756	0.237908
		0.123873	0.120127	0.122159	0.253418	0.223261	0.262263
		0.121665	0.121509	0.121989	0.252357	0.223016	0.231916
		0.120091	0.120582	0.122427	0.263072	0.215549	0.239538
		0.120936	0.120635	0.127806	0.227524	0.221639	0.244222
		0.129423	0.122292	0.124704	0.261251	0.223232	0.247762
		0.119686	0.116597	0.125378	0.23368	0.258943	0.247814
		0.12707	0.118312	0.12164	0.232893	0.229126	0.230839
		0.125454	0.116172	0.123377	0.242981	0.230925	0.24227
		0.130986	0.115642	0.123946	0.242977	0.239703	0.264552
		0.123792	0.114737	0.124022	0.225814	0.249851	0.248555
		0.121863	0.11459	0.127048	0.236556	0.215883	0.240982
		0.120646	0.11309	0.121449	0.235012	0.226783	0.259524
		0.12366	0.119501	0.125473	0.230546	0.235238	0.252893
		0.11998	0.111463	0.118317	0.262277	0.267603	0.245363
		0.120908	0.11662	0.12592	0.250871	0.229229	0.241566
		0.121237	0.113108	0.124888	0.282626	0.232647	0.213092
		0.127591	0.11765	0.134001	0.222662	0.225089	0.243605
		0.125219	0.114652	0.122367	0.234221	0.235208	0.238955
		0.122367	0.11124	0.12434	0.228963	0.235165	0.245062
		0.118229	0.118633	0.133875	0.235811	0.244533	0.246059
		0.118182	0.121222	0.125891	0.236486	0.226528	0.228089
		0.123576	0.111726	0.122844	0.246216	0.229846	0.246559
		0.121588	0.115029	0.127478	0.278323	0.216579	0.246122
		0.118682	0.119184	0.127291	0.252767	0.238331	0.232296
		0.120843	0.116209	0.126429	0.243792	0.215531	0.234125
		0.119304	0.112551	0.128431	0.22908	0.221903	0.250322
		0.120575	0.116263	0.123659	0.254764	0.225337	0.24884
		0.120935	0.108375	0.128869	0.242373	0.229276	0.247554
		0.12519	0.114179	0.126868	0.245001	0.241661	0.236431
		0.130643	0.122556	0.130379	0.240911	0.233627	0.235329
		0.122494	0.109239	0.122439	0.283779	0.21732	0.23023
		0.120232	0.113146	0.12239	0.249479	0.240557	0.242719
		0.131045	0.117697	0.1249	0.259936	0.22528	0.227636
		0.124522	0.115203	0.130782	0.256521	0.251565	0.24539
		0.122998	0.112847	0.128004	0.228824	0.226889	0.249606
		0.117718	0.118316	0.126785	0.248861	0.227345	0.243317
		0.121704	0.114921	0.131137	0.270174	0.232446	0.233795
		0.119914	0.112311	0.12151	0.237572	0.2179	0.23994
		0.123025	0.112027	0.123746	0.234059	0.218766	0.260249
		0.117713	0.116243	0.123867	0.244099	0.227696	0.242188
		0.126936	0.121437	0.120509	0.251818	0.252636	0.251026
		0.118385	0.111599	0.121546	0.245711	0.217685	0.263981
		0.121797	0.11376	0.131776	0.25572	0.220774	0.261803
		0.122002	0.115967	0.125805	0.244118	0.24481	0.232547
		0.124144	0.113484	0.127801	0.271112	0.222988	0.234585
		0.117131	0.110548	0.128395	0.239339	0.225672	0.240854
		0.120731	0.117211	0.129696	0.261552	0.244437	0.242517
		0.128651	0.122044	0.121885	0.267988	0.240366	0.21911
		0.120317	0.111234	0.123992	0.25998	0.229133	0.251485
		0.11958	0.116502	0.132974	0.267057	0.214049	0.244942
		0.122605	0.117383	0.130691	0.243571	0.225047	0.250534
		0.11944	0.116221	0.126288	0.230743	0.226564	0.231822
		0.123129	0.120919	0.127294	0.251202	0.24655	0.240182
		0.12261	0.117243	0.12135	0.241201	0.257924	0.230824
		0.116336	0.116854	0.123883	0.241412	0.257425	0.249324
		0.121094	0.113426	0.126402	0.244087	0.2336	0.240557
		0.120097	0.115078	0.123343	0.245863	0.227229	0.250998
		0.124764	0.109916	0.121539	0.240869	0.256467	0.227734
		0.122237	0.118504	0.119439	0.254312	0.212954	0.238481
		0.123177	0.113881	0.1271	0.241901	0.223349	0.234703
		0.125039	0.119275	0.125139	0.255531	0.242501	0.254071
		0.1206	0.117851	0.126218	0.273827	0.225473	0.238455
		0.120185	0.108054	0.124757	0.235032	0.214461	0.23671
		0.115464	0.112917	0.122485	0.264548	0.233644	0.229827
		0.121141	0.117301	0.126665	0.258145	0.236431	0.254298
		0.122776	0.11781	0.127303	0.242858	0.229616	0.244622
		0.121803	0.112882	0.130214	0.250003	0.218609	0.231248
		0.123203	0.120939	0.126675	0.29828	0.262107	0.231406
		0.116716	0.120227	0.130336	0.234414	0.224178	0.240658
		0.122933	0.117472	0.12464	0.290512	0.231858	0.239754
		0.122429	0.117824	0.120932	0.273662	0.245764	0.25023
		0.121898	0.11701	0.124631	0.252962	0.218976	0.231855
		0.120226	0.114186	0.129662	0.246797	0.213809	0.249938
		0.122627	0.118998	0.123108	0.233498	0.229436	0.235886
		0.128296	0.113779	0.124615	0.250639	0.244429	0.22718
		0.12744	0.115546	0.126444	0.255925	0.271012	0.237628
		0.121855	0.119518	0.121207	0.238978	0.228206	0.25234
		0.120129	0.115846	0.125431	0.236113	0.206538	0.233989
		0.118601	0.119535	0.124243	0.256729	0.210635	0.239991
		0.123515	0.114329	0.129861	0.245067	0.217387	0.248817
		0.123537	0.112435	0.12276	0.249818	0.216654	0.227285
		0.121766	0.115893	0.125072	0.24148	0.22428	0.259247
		0.120837	0.125006	0.122327	0.231888	0.217603	0.236283
		0.123242	0.120122	0.124715	0.259315	0.220994	0.230615
		0.123571	0.116028	0.125868	0.261462	0.218754	0.230666
		0.123235	0.113946	0.125797	0.270505	0.219256	0.236266
		0.120187	0.117582	0.120852	0.238742	0.22694	0.227781
		0.120931	0.111904	0.127532	0.252148	0.227951	0.240294
		0.12084	0.113775	0.131249	0.234092	0.213211	0.258625
		0.126029	0.112865	0.127807	0.255005	0.238146	0.236922
		0.122212	0.114197	0.124687	0.239455	0.224052	0.2326
		0.120565	0.115415	0.124908	0.244661	0.221963	0.228983
		0.125606	0.113587	0.125933	0.242693	0.246012	0.246679
		0.118516	0.117921	0.128176	0.248272	0.223339	0.249157
		0.120811	0.121736	0.122874	0.243705	0.24348	0.238477
		0.123372	0.117157	0.124776	0.240363	0.22665	0.227613
		0.117161	0.117975	0.123827	0.237148	0.213802	0.248144
		0.121714	0.113258	0.123077	0.253173	0.223513	0.231202
		0.119955	0.113925	0.128845	0.254079	0.222399	0.238056
		0.122819	0.121281	0.120891	0.242088	0.242865	0.229742
		0.123735	0.110151	0.133521	0.242951	0.215777	0.248606
		0.112596	0.120852	0.122701	0.252098	0.211135	0.249962
		0.12135	0.118988	0.127506	0.26033	0.221628	0.248898
		0.120584	0.111434	0.133721	0.228178	0.229225	0.232015
		0.125852	0.116275	0.123364	0.23354	0.246129	0.25875
		0.124319	0.119131	0.12509	0.255123	0.24268	0.2476
		0.121375	0.116784	0.128987	0.241503	0.222444	0.229154
		0.125579	0.112658	0.122908	0.231412	0.271728	0.24873
		0.125101	0.118821	0.121726	0.240293	0.21445	0.23343
		0.117148	0.117635	0.12322	0.238757	0.236039	0.239894
		0.122817	0.110168	0.123822	0.23546	0.222715	0.24402
		0.118801	0.123763	0.12754	0.247487	0.24695	0.222285
		0.127919	0.118287	0.121595	0.224819	0.249078	0.239245
		0.127557	0.115089	0.123109	0.249041	0.239616	0.224253
		0.121795	0.119764	0.123819	0.234961	0.210446	0.251703
		0.122606	0.114393	0.128011	0.258527	0.217911	0.238613
		0.12525	0.116174	0.124711	0.247911	0.235156	0.234764
		0.120217	0.112083	0.126375	0.255192	0.216535	0.232
		0.122652	0.11053	0.124878	0.245335	0.229667	0.249249
		0.128466	0.113769	0.129971	0.236773	0.213989	0.262464
		0.123635	0.116969	0.124594	0.249274	0.223826	0.240605
		0.122802	0.109605	0.124075	0.237606	0.218704	0.250214
		0.127181	0.114353	0.123327	0.249469	0.227555	0.252515
		0.117075	0.115365	0.122522	0.229782	0.220995	0.234601
		0.118825	0.1183	0.125349	0.238468	0.223081	0.250755
		0.12499	0.11369	0.123953	0.240626	0.213898	0.23663
		0.121669	0.115054	0.133657	0.275917	0.214998	0.251983
		0.12045	0.119503	0.122525	0.250322	0.229244	0.238884
		0.120665	0.115937	0.119949	0.259264	0.233003	0.24568
		0.118806	0.122009	0.120044	0.24043	0.223307	0.257101
		0.117538	0.116228	0.123062	0.241222	0.230139	0.225541
		0.119707	0.11735	0.129183	0.258963	0.222016	0.223068
		0.123152	0.11896	0.124144	0.243084	0.224441	0.235827
		0.12444	0.112444	0.120815	0.256381	0.232974	0.232988
		0.120692	0.114763	0.129524	0.247151	0.237517	0.231167
		0.121845	0.116515	0.135591	0.253592	0.223593	0.238268
		0.128284	0.11453	0.121648	0.257307	0.215124	0.2311
		0.114058	0.112957	0.128754	0.233139	0.237801	0.229752
		0.118442	0.117497	0.118829	0.255848	0.245025	0.256322
		0.120184	0.112813	0.128339	0.247092	0.21989	0.247149
		0.119184	0.112266	0.132929	0.245963	0.215572	0.232885
		0.119113	0.115849	0.122869	0.227742	0.237269	0.232932
		0.120748	0.115776	0.127084	0.229364	0.228143	0.241128
		0.121658	0.11656	0.119194	0.258885	0.258193	0.251407
		0.12262	0.115766	0.120538	0.25648	0.210422	0.226865
		0.119831	0.115223	0.122071	0.242216	0.236894	0.239946
		0.127053	0.117574	0.129	0.230401	0.208816	0.242535
		0.119777	0.114744	0.126496	0.265009	0.227383	0.231701
		0.125866	0.112082	0.126798	0.241978	0.235748	0.224007
		0.124158	0.118756	0.125924	0.262711	0.225471	0.232446
		0.11929	0.114622	0.124807	0.243564	0.259139	0.242575
		0.12416	0.115567	0.132767	0.236823	0.238107	0.218485
		0.127268	0.117948	0.121075	0.244087	0.21557	0.225622
		0.126284	0.118642	0.125796	0.239039	0.239107	0.256002
		0.117768	0.118605	0.12719	0.261909	0.223741	0.258711
		0.123212	0.119733	0.124221	0.25964	0.221038	0.230571
		0.119824	0.115355	0.132424	0.239938	0.226179	0.248644
		0.120035	0.114739	0.131254	0.248495	0.258887	0.231766
		0.120446	0.116566	0.124434	0.237331	0.213366	0.223488
		0.120384	0.111008	0.120859	0.27635	0.256816	0.225086
		0.121453	0.111934	0.123367	0.23602	0.228173	0.252892
		0.122138	0.111829	0.133728	0.240817	0.243423	0.260615
		0.114592	0.114654	0.128372	0.254494	0.22739	0.239393
		0.117655	0.11673	0.121951	0.252471	0.238161	0.246838
		0.118487	0.12262	0.125231	0.229282	0.231035	0.246876
		0.11835	0.116598	0.12396	0.24746	0.273945	0.229388
		0.12337	0.11694	0.128955	0.242487	0.236912	0.224967
		0.121857	0.116076	0.131812	0.254512	0.234324	0.244471
		0.116002	0.111736	0.126758	0.245574	0.234822	0.235102
		0.121908	0.117463	0.125833	0.212438	0.214478	0.230454
		0.120867	0.111747	0.123705	0.227607	0.244292	0.231944
		0.120488	0.112189	0.120788	0.247587	0.263237	0.252199
		0.120128	0.117443	0.122875	0.22902	0.23593	0.230875
		0.121398	0.119647	0.118742	0.252224	0.24462	0.229373
		0.130247	0.121811	0.123019	0.243753	0.231992	0.247735
		0.124944	0.115879	0.121041	0.24668	0.225904	0.246956
		0.12375	0.114205	0.121808	0.237927	0.247345	0.245852
		0.126459	0.116976	0.125654	0.254299	0.222229	0.227057
		0.125592	0.119567	0.1285	0.259758	0.242841	0.248254
		0.126307	0.113432	0.123685	0.253272	0.225876	0.233
		0.127295	0.115549	0.124737	0.241726	0.233787	0.235297
		0.121701	0.112447	0.122408	0.24505	0.219488	0.253201
		0.119035	0.118826	0.121323	0.231583	0.235921	0.268035
		0.120879	0.113277	0.124991	0.243449	0.239683	0.217457
		0.118567	0.115535	0.118495	0.255898	0.218864	0.239492
		0.123383	0.116408	0.133126	0.225645	0.219242	0.260819
		0.117932	0.116282	0.127976	0.259301	0.234305	0.225361
		0.126857	0.115208	0.125416	0.239214	0.224346	0.243336
		0.117565	0.120645	0.127309	0.25732	0.24763	0.22397
		0.12198	0.116286	0.128001	0.275528	0.227299	0.23264
		0.116891	0.118062	0.12382	0.257165	0.234998	0.245343
		0.118199	0.121293	0.122921	0.254872	0.238665	0.248808
		0.121873	0.112371	0.117438	0.241122	0.223426	0.237785
		0.116308	0.112602	0.12559	0.258988	0.232153	0.242755
		0.12126	0.11662	0.125928	0.249209	0.218075	0.252619
		0.120782	0.119482	0.122179	0.244547	0.220737	0.222953
		0.121715	0.116631	0.129041	0.241069	0.224607	0.247885
		0.118934	0.114758	0.134296	0.247771	0.24928	0.25715
		0.126198	0.11571	0.120503	0.240533	0.235645	0.238763
		0.118887	0.112572	0.123155	0.233847	0.223933	0.237776
		0.124158	0.118465	0.12582	0.232454	0.218863	0.242356
		0.122053	0.121793	0.129352	0.23694	0.298308	0.250198
		0.119615	0.115807	0.126056	0.23226	0.229156	0.226036
		0.120782	0.111906	0.132707	0.229274	0.241962	0.241584
		0.120762	0.116481	0.125884	0.23737	0.245789	0.227174
		0.118962	0.115943	0.12282	0.252962	0.209217	0.232271
		0.121925	0.118138	0.132727	0.25899	0.231172	0.22762
		0.125687	0.111241	0.129528	0.235624	0.220896	0.261571
		0.125438	0.117369	0.125459	0.234189	0.230459	0.229812
		0.121753	0.114792	0.122448	0.246034	0.228705	0.236019
		0.124289	0.119376	0.12459	0.250904	0.218855	0.23445
		0.125467	0.116217	0.1342	0.245522	0.222065	0.248651
		0.120746	0.117416	0.120498	0.236154	0.230438	0.234727
		0.121384	0.116052	0.123434	0.230915	0.222732	0.227826
		0.122166	0.110602	0.125939	0.251984	0.25761	0.252447
		0.119827	0.115571	0.130409	0.234128	0.229413	0.238025
		0.125434	0.11945	0.130243	0.258501	0.241526	0.230895
		0.121147	0.116346	0.122636	0.233802	0.235666	0.227664
		0.119275	0.119642	0.126381	0.251322	0.23091	0.250753
		0.121683	0.112948	0.125104	0.232783	0.227408	0.254862
		0.11972	0.113872	0.125942	0.254287	0.23274	0.236338
		0.119814	0.113465	0.124614	0.249873	0.235713	0.239836
		0.120576	0.112778	0.123711	0.28023	0.221126	0.264721
		0.120982	0.117589	0.131935	0.26265	0.217624	0.240678
		0.123911	0.115043	0.118155	0.237631	0.213619	0.25342
		0.121937	0.111167	0.129367	0.242378	0.2252	0.256597
		0.119049	0.116995	0.1268	0.234446	0.244017	0.229945
		0.117718	0.114023	0.123826	0.242107	0.257837	0.224306
		0.122348	0.110205	0.125841	0.260698	0.243292	0.230914
		0.120544	0.117688	0.125791	0.258116	0.253071	0.232223
		0.127404	0.111126	0.128769	0.25784	0.214853	0.255255
		0.121167	0.117548	0.127097	0.257971	0.231663	0.243727
		0.118299	0.120281	0.124533	0.270256	0.222193	0.256266
		0.126118	0.115429	0.131771	0.229688	0.220004	0.24161
		0.126998	0.113834	0.121583	0.248915	0.232814	0.218222
		0.122986	0.116786	0.129667	0.246204	0.214358	0.240766
		0.125011	0.11952	0.123841	0.263929	0.218222	0.233583
		0.123087	0.116766	0.131811	0.24838	0.242589	0.241958
		0.125677	0.111294	0.126652	0.263042	0.202579	0.277055
		0.118413	0.118191	0.126677	0.262685	0.217119	0.242254
		0.125276	0.11281	0.127243	0.250538	0.253784	0.236706
		0.121891	0.116444	0.132037	0.238812	0.209966	0.238029
		0.123164	0.114214	0.13002	0.27378	0.224636	0.245906
		0.120067	0.111157	0.126182	0.235324	0.217815	0.23436
		0.127306	0.11678	0.123265	0.227189	0.253925	0.237461
		0.11206	0.113793	0.122909	0.271088	0.237548	0.252874
		0.114225	0.119904	0.121156	0.24482	0.223012	0.244698
		0.125985	0.119031	0.124884	0.237784	0.21718	0.228775
		0.124958	0.117907	0.125509	0.253346	0.210233	0.231846
		0.125895	0.115367	0.125644	0.243877	0.227895	0.229667
		0.126458	0.125483	0.123443	0.248742	0.221538	0.241304
		0.1214	0.113254	0.129518	0.251155	0.237537	0.227379
		0.128838	0.115192	0.126283	0.259808	0.226984	0.252877
		0.122181	0.117504	0.124126	0.235763	0.234445	0.25446
		0.120363	0.113904	0.116107	0.219981	0.217329	0.228901
		0.126352	0.119866	0.121242	0.250143	0.233129	0.220684
		0.124593	0.119873	0.120097	0.245184	0.225348	0.231572
		0.122955	0.107627	0.119252	0.254617	0.258302	0.228815
		0.123947	0.117691	0.127773	0.25017	0.208317	0.23286
		0.118891	0.115748	0.119578	0.23752	0.238527	0.237621
		0.112944	0.114967	0.12541	0.258089	0.246933	0.250269
		0.128993	0.109429	0.122777	0.242895	0.257498	0.230126
		0.119236	0.122784	0.124722	0.242074	0.247441	0.259844
		0.124812	0.116722	0.130613	0.246964	0.235886	0.225115
		0.119369	0.114638	0.125159	0.260629	0.258536	0.227841
		0.127064	0.115033	0.132543	0.245127	0.253002	0.232443
		0.119432	0.11505	0.126468	0.236478	0.229989	0.228543
		0.125088	0.115934	0.120956	0.225753	0.222918	0.251882
		0.124397	0.113981	0.129841	0.243646	0.247368	0.241545
		0.125546	0.114328	0.132869	0.251532	0.284418	0.24887
		0.121654	0.108683	0.123901	0.259783	0.235992	0.219159
		0.123224	0.118082	0.131389	0.24555	0.217959	0.228274
		0.123449	0.113277	0.131571	0.251342	0.231844	0.259586
		0.120211	0.113066	0.136278	0.234752	0.226591	0.249113
		0.127224	0.11341	0.120204	0.22179	0.244094	0.231068
		0.128597	0.115515	0.128328	0.251839	0.222227	0.240027
		0.124106	0.11598	0.12404	0.239277	0.241857	0.239084
		0.118904	0.116981	0.120089	0.245125	0.227917	0.226235
		0.120925	0.112114	0.12262	0.245044	0.207782	0.22458
		0.119266	0.114581	0.122258	0.232606	0.230708	0.253488
		0.116413	0.113875	0.125994	0.241284	0.21847	0.258034
		0.120534	0.11755	0.126561	0.250231	0.249189	0.239117
		0.120651	0.118117	0.130589	0.218162	0.204984	0.241549
		0.119476	0.113614	0.126334	0.260923	0.228884	0.240167
		0.123464	0.121587	0.13113	0.26684	0.217397	0.243676
		0.132282	0.119105	0.130021	0.256117	0.250899	0.240866
		0.116687	0.115973	0.133666	0.239214	0.228118	0.225106
		0.120485	0.121403	0.124637	0.244779	0.24321	0.232036
		0.119278	0.116264	0.12163	0.255586	0.23704	0.237666
		0.124563	0.118505	0.125744	0.238714	0.272692	0.241858
		0.119863	0.12075	0.128251	0.246009	0.243125	0.237427
		0.123917	0.119712	0.121937	0.267686	0.221572	0.22828
		0.125609	0.109697	0.129165	0.241389	0.233804	0.242872
		0.121512	0.120334	0.125817	0.228374	0.236219	0.227691
		0.123245	0.115014	0.125279	0.261872	0.210308	0.243459
		0.123594	0.109762	0.126635	0.236956	0.24583	0.242396
		0.121502	0.118624	0.125133	0.25001	0.221851	0.245809
		0.12693	0.112878	0.125067	0.264801	0.224971	0.22882
		0.122149	0.116424	0.126217	0.241379	0.219536	0.235396
		0.120442	0.113917	0.122714	0.236913	0.219898	0.225151
		0.119885	0.115599	0.131597	0.24291	0.257916	0.247539
		0.123897	0.117096	0.122786	0.283941	0.205961	0.224487
		0.12196	0.114357	0.126723	0.245092	0.24205	0.219079
		0.119955	0.118898	0.131561	0.232064	0.238497	0.216448
		0.118729	0.112178	0.126851	0.250319	0.218798	0.229974
		0.121931	0.116041	0.128731	0.257652	0.232321	0.249907
		0.119878	0.119544	0.124272	0.225619	0.236511	0.247514
		0.124527	0.119717	0.129565	0.239141	0.240827	0.213079
		0.122292	0.122947	0.127067	0.229988	0.222267	0.246255
		0.120727	0.116722	0.125549	0.240665	0.242105	0.234457
		0.119418	0.111676	0.123959	0.240816	0.221061	0.255286
		0.122755	0.113498	0.122489	0.251014	0.22872	0.246381
		0.117678	0.116372	0.127786	0.254209	0.252151	0.223674
		0.121483	0.115589	0.121626	0.260005	0.229623	0.249874
		0.11843	0.113689	0.12231	0.240766	0.236754	0.230949
		0.124688	0.114745	0.120544	0.263247	0.245668	0.228537
		0.121832	0.115457	0.127181	0.268839	0.217708	0.254213
		0.121185	0.110801	0.131246	0.249566	0.229052	0.239741
		0.122788	0.117165	0.118227	0.242598	0.23925	0.255514
		0.11891	0.113048	0.131055	0.239276	0.257837	0.251976
		0.126105	0.115475	0.127219	0.253364	0.222653	0.260697
		0.120734	0.109658	0.124544	0.247619	0.216808	0.244231
		0.123181	0.120107	0.119477	0.23962	0.223323	0.256028
		0.1258	0.116423	0.124567	0.256328	0.223892	0.234763
		0.121055	0.112117	0.125266	0.233987	0.225854	0.236229
		0.126608	0.11532	0.128245	0.249892	0.231688	0.266817
		0.121791	0.121959	0.122281	0.230538	0.226796	0.255934
		0.116424	0.113503	0.12484	0.246528	0.206384	0.252108
		0.114578	0.11839	0.124024	0.266733	0.225251	0.261037
		0.129942	0.109725	0.120966	0.239086	0.230139	0.244955
		0.124174	0.115073	0.122052	0.259661	0.206458	0.239918
		0.121883	0.116828	0.126636	0.263395	0.233207	0.233683
		0.129362	0.117511	0.119194	0.260749	0.225902	0.229419
		0.119407	0.115465	0.123133	0.247519	0.245702	0.239977
		0.132789	0.123231	0.123636	0.249917	0.229883	0.243157
		0.126415	0.111452	0.128743	0.256433	0.269566	0.24724
		0.121167	0.113374	0.124339	0.245248	0.232359	0.225494
		0.12797	0.109219	0.126062	0.244146	0.256998	0.221644
		0.123718	0.11352	0.124626	0.240792	0.241602	0.217283
		0.121898	0.113481	0.125435	0.250139	0.287955	0.242328
		0.125351	0.119706	0.123262	0.261667	0.208058	0.237976
		0.130348	0.124217	0.11894	0.234707	0.256059	0.231299
		0.136376	0.119089	0.134349	0.260302	0.221752	0.241969
		0.123005	0.116856	0.124545	0.234442	0.236728	0.226898
		0.116945	0.116149	0.123787	0.241605	0.241643	0.246138
		0.128265	0.11562	0.126095	0.244974	0.21562	0.236668
		0.125949	0.114588	0.127674	0.265805	0.227298	0.238481
		0.125531	0.110757	0.124798	0.229792	0.230441	0.234979
		0.126977	0.111026	0.126102	0.231701	0.219733	0.236752
		0.114779	0.113185	0.124415	0.262419	0.272225	0.224884
		0.11819	0.117256	0.13392	0.248332	0.235933	0.23775
		0.117918	0.114168	0.124661	0.247689	0.243122	0.240339
		0.125466	0.11466	0.123673	0.24677	0.230258	0.241426
		0.121055	0.118108	0.126915	0.245485	0.240373	0.221148
		0.127373	0.11512	0.129759	0.249274	0.248288	0.244931
		0.126114	0.111212	0.129009	0.269982	0.229412	0.24785
		0.123555	0.119991	0.120289	0.234953	0.238413	0.228609
		0.120081	0.11567	0.120329	0.259717	0.259803	0.237431
		0.118613	0.11448	0.124516	0.280868	0.239614	0.225926
		0.12334	0.113158	0.130222	0.239849	0.23811	0.238651
		0.117043	0.115305	0.125119	0.256883	0.221839	0.220642
		0.123098	0.111756	0.123382	0.255057	0.257935	0.253436
		0.117837	0.113362	0.126001	0.245162	0.230323	0.244013
		0.126679	0.110605	0.124782	0.2471	0.23452	0.227692
		0.119214	0.109208	0.130972	0.249602	0.232392	0.244434
		0.118094	0.113461	0.126778	0.238345	0.222167	0.235828
		0.125218	0.111	0.124353	0.258737	0.220346	0.25274
		0.119313	0.11482	0.129053	0.258992	0.249531	0.248142
		0.117139	0.114676	0.119459	0.275319	0.244867	0.220235
		0.124285	0.11667	0.124641	0.253239	0.23404	0.24445
		0.121958	0.117864	0.122111	0.26548	0.224	0.237168
		0.122447	0.112617	0.121036	0.239598	0.214036	0.234185
		0.117	0.118417	0.125642	0.233664	0.221988	0.251763
		0.13031	0.117741	0.127488	0.223142	0.215796	0.279756
		0.130848	0.116707	0.130833	0.229611	0.222216	0.225361
		0.118869	0.125103	0.125053	0.241313	0.229468	0.246081
		0.11863	0.113981	0.123416	0.254315	0.231964	0.248994
		0.118995	0.117798	0.122092	0.258487	0.285306	0.245271
		0.129126	0.121043	0.121643	0.236342	0.233465	0.259776
		0.1212	0.115256	0.121566	0.265238	0.22323	0.256067
		0.125736	0.112445	0.126184	0.273534	0.235362	0.234447
		0.126429	0.116174	0.128978	0.258056	0.244994	0.237789
		0.124519	0.115418	0.125166	0.238773	0.22148	0.234847
		0.121371	0.11813	0.12709	0.255446	0.212011	0.215449
		0.128124	0.116683	0.122718	0.238873	0.220583	0.240942
		0.121931	0.113571	0.126632	0.242529	0.216866	0.235674
		0.121338	0.113275	0.129167	0.231464	0.217021	0.244836
		0.119088	0.112345	0.122445	0.253881	0.219771	0.238796
		0.119939	0.11829	0.12903	0.234106	0.241494	0.24294
		0.120588	0.113852	0.12656	0.243076	0.224344	0.251843
		0.12537	0.111541	0.134332	0.265709	0.269854	0.249268
		0.122855	0.116496	0.121725	0.228834	0.221909	0.230993
		0.115237	0.107579	0.126081	0.240527	0.245352	0.248608
		0.12716	0.118582	0.12441	0.240888	0.234343	0.216089
		0.121438	0.118332	0.125613	0.237158	0.212953	0.225276
		0.123506	0.118897	0.126359	0.232678	0.222655	0.260634
		0.125461	0.122573	0.125298	0.261328	0.226913	0.237864
		0.121816	0.111243	0.12038	0.226597	0.242257	0.239136
		0.122586	0.112245	0.126472	0.242814	0.232031	0.245009
		0.120778	0.112768	0.124502	0.242766	0.259295	0.236666
		0.119411	0.114941	0.128801	0.252234	0.237197	0.228444
		0.121135	0.114778	0.126569	0.255848	0.219839	0.236003
		0.118325	0.125195	0.131434	0.253794	0.225027	0.227223
		0.12586	0.112094	0.128551	0.242421	0.217041	0.233173
		0.122732	0.127034	0.128806	0.218119	0.240446	0.257714
		0.121752	0.117648	0.123864	0.242381	0.206468	0.231121
		0.126843	0.117814	0.125488	0.234558	0.223752	0.246719
		0.12187	0.112848	0.123401	0.258822	0.203648	0.292034
		0.121603	0.118646	0.128233	0.22374	0.272293	0.248945
		0.125924	0.117304	0.121338	0.225789	0.223185	0.246433
		0.119665	0.11438	0.124641	0.24967	0.224579	0.224781
		0.117483	0.11632	0.126103	0.245984	0.241257	0.240788
		0.120319	0.113298	0.125012	0.258257	0.25378	0.225719
		0.126674	0.112761	0.133704	0.256549	0.236168	0.230325
		0.118869	0.113355	0.125038	0.2362	0.240706	0.239409
		0.120236	0.116229	0.122344	0.230517	0.222024	0.241804
		0.118045	0.116175	0.124482	0.262702	0.237135	0.238723
		0.121419	0.115764	0.121713	0.282602	0.202766	0.24251
		0.125305	0.111503	0.124518	0.262493	0.214699	0.27428
		0.123299	0.122032	0.134274	0.248481	0.207694	0.236575
		0.118255	0.116465	0.12426	0.276799	0.223714	0.252425
		0.12568	0.111614	0.119334	0.276509	0.217437	0.225096
		0.124476	0.123791	0.122854	0.271265	0.219844	0.267093
		0.12444	0.115696	0.121152	0.240152	0.231876	0.251577
		0.121276	0.112387	0.128464	0.246841	0.216814	0.266139
		0.123778	0.112708	0.127275	0.253587	0.210384	0.249579
		0.124811	0.118005	0.126793	0.240477	0.240465	0.240031
		0.12041	0.113997	0.125283	0.249408	0.223432	0.242801
		0.120086	0.11136	0.124435	0.244777	0.223539	0.233132
		0.122647	0.11097	0.124827	0.263077	0.283586	0.248049
		0.121727	0.120331	0.131336	0.27295	0.215357	0.239707
		0.11837	0.117359	0.124246	0.252499	0.247409	0.25884
		0.117196	0.125554	0.131466	0.239662	0.222061	0.238321
		0.122604	0.111515	0.124741	0.220399	0.242999	0.235709
		0.117614	0.119942	0.12333	0.252841	0.265884	0.247584
		0.115913	0.115636	0.132018	0.237999	0.216999	0.251948
		0.122692	0.115225	0.13205	0.238811	0.244728	0.247105
		0.11938	0.118313	0.122825	0.257633	0.233315	0.249135
		0.123794	0.113094	0.127559	0.254249	0.246457	0.24067
		0.121393	0.117071	0.1236	0.25211	0.230096	0.228113
		0.118679	0.116429	0.128554	0.258667	0.212955	0.241754
		0.118488	0.115394	0.132336	0.244267	0.224684	0.226199
		0.122378	0.110624	0.121748	0.250598	0.22867	0.244965
		0.123127	0.115477	0.133228	0.233638	0.230546	0.240315
		0.119812	0.116943	0.124075	0.258208	0.233224	0.233724
		0.120124	0.113184	0.123075	0.250539	0.24552	0.238601
		0.119728	0.114857	0.124247	0.248913	0.225124	0.224262
		0.116997	0.115822	0.127663	0.237707	0.259194	0.227437
		0.121431	0.117148	0.125541	0.250385	0.238033	0.287967
		0.130321	0.112912	0.126127	0.252683	0.220608	0.227322
		0.125816	0.113097	0.125695	0.254728	0.243995	0.24032
		0.121989	0.111086	0.119006	0.249708	0.23291	0.245343
		0.123494	0.119667	0.129489	0.252253	0.228158	0.253675
		0.121935	0.117314	0.121117	0.257663	0.219952	0.228347
		0.123071	0.122474	0.132935	0.241484	0.215805	0.242987
		0.117408	0.115164	0.125833	0.242514	0.216963	0.24942
		0.121111	0.11325	0.123937	0.253409	0.221954	0.255825
		0.122814	0.110304	0.123215	0.227112	0.225395	0.259582
		0.120537	0.122554	0.125448	0.238773	0.20823	0.242513
		0.11782	0.113398	0.123043	0.253472	0.222476	0.242677
		0.124154	0.116179	0.124764	0.244469	0.22639	0.234903
		0.127481	0.118343	0.126168	0.244518	0.228926	0.247856
		0.121984	0.116282	0.128318	0.236127	0.206068	0.223337
		0.120055	0.115607	0.124548	0.233673	0.229373	0.248825
		0.124403	0.118729	0.127342	0.278216	0.215622	0.247008
		0.119554	0.117869	0.128309	0.23685	0.238318	0.241519
		0.121158	0.114912	0.121269	0.274603	0.244955	0.240539
		0.11927	0.113764	0.124909	0.241485	0.246466	0.243227
		0.126162	0.111653	0.125919	0.229297	0.218078	0.250212
		0.129398	0.115293	0.128276	0.243832	0.247042	0.234119
		0.114614	0.119475	0.131234	0.256141	0.230238	0.255506
		0.121107	0.117403	0.124978	0.23766	0.241381	0.253087
		0.131002	0.116661	0.128156	0.26306	0.217588	0.236853
		0.121164	0.114896	0.126448	0.238566	0.240732	0.243753
		0.125994	0.120143	0.122773	0.257699	0.220803	0.239278
		0.132063	0.114969	0.125075	0.251815	0.227196	0.231556
		0.132144	0.120493	0.122271	0.270377	0.21575	0.240397
		0.12058	0.119901	0.124052	0.253142	0.218678	0.237976
		0.12456	0.119436	0.120991	0.298878	0.212406	0.228721
		0.11794	0.113367	0.122938	0.250563	0.231546	0.238094
		0.123822	0.111057	0.122993	0.252247	0.210735	0.239977
		0.121853	0.117984	0.122095	0.24998	0.223466	0.237413
		0.123645	0.11283	0.128554	0.247692	0.227296	0.236288
		0.120721	0.113072	0.123491	0.251419	0.220717	0.228712
		0.128141	0.114592	0.131252	0.23918	0.244132	0.223918
		0.122276	0.114481	0.132463	0.261267	0.244813	0.233906
		0.12006	0.112458	0.125151	0.28302	0.208241	0.246311
		0.130508	0.119128	0.122453	0.247864	0.218808	0.233278
		0.121748	0.121112	0.125631	0.249836	0.256737	0.241032
		0.119894	0.116206	0.123107	0.250703	0.227874	0.233697
		0.129219	0.114104	0.124526	0.251509	0.248076	0.24563
		0.120898	0.11722	0.130513	0.245822	0.251791	0.221949
		0.128012	0.126739	0.128761	0.264857	0.208042	0.239832
		0.121008	0.110593	0.124316	0.229815	0.216303	0.242501
		0.117342	0.123431	0.123437	0.242412	0.220684	0.246785
		0.125411	0.104673	0.121423	0.241109	0.251131	0.230446
		0.121466	0.117435	0.131869	0.239616	0.234922	0.235653
		0.122353	0.117301	0.123967	0.244895	0.225551	0.242456
		0.116982	0.115351	0.124795	0.237703	0.215479	0.244547
		0.126901	0.113408	0.1299	0.24623	0.230892	0.234448
		0.1185	0.115195	0.124336	0.255343	0.234381	0.244117
		0.119115	0.10992	0.128762	0.256433	0.22971	0.248169
		0.118533	0.113778	0.123959	0.245325	0.221601	0.248897
		0.123783	0.115027	0.127995	0.255576	0.224581	0.226658
		0.120826	0.118072	0.128	0.242364	0.255753	0.234511
		0.121403	0.115541	0.125274	0.23377	0.207169	0.230493
		0.12707	0.116614	0.132799	0.251094	0.257251	0.250029
		0.121172	0.114014	0.122953	0.249791	0.210782	0.232873
		0.117593	0.118576	0.119045	0.234962	0.239812	0.244787
		0.123514	0.114505	0.123918	0.229165	0.231467	0.260642
		0.125238	0.115742	0.125939	0.232299	0.216448	0.238396
		0.119808	0.116431	0.121894	0.246017	0.225731	0.258825
		0.123615	0.115821	0.124983	0.228061	0.23319	0.266545
		0.116934	0.116375	0.123833	0.244976	0.245576	0.232111
		0.116124	0.117544	0.125474	0.233531	0.217366	0.257052
		0.119321	0.116576	0.1221	0.250578	0.224152	0.247583
		0.119781	0.111219	0.130272	0.250578	0.228816	0.241989
		0.121076	0.119521	0.121658	0.24991	0.221813	0.24082
		0.120385	0.117677	0.130939	0.245176	0.226688	0.241716
		0.125071	0.120627	0.122985	0.232021	0.23835	0.23976
		0.131014	0.11138	0.120617	0.246465	0.247931	0.260388
		0.127739	0.112367	0.120649	0.245146	0.233987	0.252253
		0.122031	0.125027	0.122433	0.279478	0.229631	0.246216
		0.121305	0.112962	0.127203	0.267649	0.223409	0.227821
		0.116802	0.117471	0.119881	0.250996	0.247015	0.242754
		0.120426	0.11527	0.121019	0.245775	0.225795	0.248524
		0.129492	0.116846	0.127056	0.22914	0.245594	0.228027
		0.11972	0.114802	0.122248	0.255925	0.224441	0.242763
		0.120903	0.120376	0.125559	0.2265	0.251625	0.255155
		0.122402	0.111243	0.124011	0.256235	0.221828	0.249184
		0.122131	0.120504	0.130757	0.231185	0.230712	0.245454
		0.127414	0.114557	0.123973	0.255547	0.221308	0.230662
		0.129117	0.115913	0.115291	0.256335	0.242766	0.262125
		0.119125	0.114666	0.128094	0.233221	0.223436	0.248229
		0.125035	0.112924	0.124739	0.261884	0.214365	0.255992
		0.120297	0.121124	0.118102	0.266489	0.215312	0.242113
		0.119695	0.114467	0.125846	0.233142	0.224946	0.257488
		0.126113	0.124503	0.124286	0.234603	0.232597	0.228834
		0.123178	0.113687	0.123074	0.252591	0.216846	0.267928
		0.121069	0.112335	0.123547	0.217135	0.214319	0.228148
		0.120848	0.117327	0.121507	0.263025	0.226969	0.224388
		0.120686	0.124931	0.119694	0.235025	0.216843	0.238461
		0.124529	0.1116	0.131863	0.257844	0.215961	0.261908
		0.121835	0.117571	0.125855	0.242865	0.2443	0.253867
		0.123781	0.11539	0.132861	0.237775	0.227147	0.237453
		0.121815	0.109141	0.120255	0.226964	0.254735	0.258
		0.120541	0.110535	0.121055	0.244967	0.221341	0.223558
		0.123208	0.114525	0.125021	0.267036	0.220739	0.25403
		0.12464	0.115596	0.127588	0.258082	0.272719	0.281456
		0.127271	0.118941	0.126664	0.245144	0.227259	0.257907
		0.125295	0.11512	0.124399	0.256935	0.228454	0.227752
		0.121981	0.117205	0.121619	0.26303	0.224606	0.238641
		0.12466	0.118024	0.127664	0.254332	0.231713	0.245021
		0.123364	0.111246	0.12361	0.253762	0.245921	0.251996
		0.119917	0.109529	0.129734	0.258348	0.241987	0.24635
		0.11916	0.115766	0.123169	0.253422	0.227389	0.243091
		0.126479	0.115749	0.122593	0.244659	0.234302	0.225834
		0.121689	0.113396	0.121036	0.263131	0.266314	0.245712
		0.125212	0.113252	0.122875	0.231325	0.261977	0.231418
		0.126104	0.119441	0.122095	0.249524	0.233462	0.247987
		0.122202	0.114007	0.134642	0.256346	0.221588	0.237441
		0.121942	0.12768	0.13126	0.241077	0.227439	0.234766
		0.125137	0.113624	0.12597	0.260571	0.239869	0.240978
		0.120197	0.118644	0.126982	0.232297	0.211743	0.23673
		0.120397	0.113998	0.123253	0.257123	0.252001	0.220675
		0.124052	0.117576	0.122384	0.264654	0.228354	0.225839
		0.119553	0.114297	0.133321	0.228152	0.262226	0.226066
		0.118533	0.107612	0.127186	0.252993	0.211368	0.233063
		0.117416	0.113269	0.133477	0.245636	0.268417	0.250264
		0.120675	0.114315	0.133006	0.257337	0.227965	0.223117
		0.120341	0.112937	0.129069	0.241719	0.241686	0.232557
		0.125242	0.119036	0.128588	0.257063	0.224842	0.249659
		0.119998	0.116721	0.127237	0.256757	0.214781	0.236664
		0.122989	0.114532	0.122119	0.244337	0.197403	0.235185
		0.129227	0.114473	0.121533	0.24287	0.239666	0.249297
		0.128325	0.110347	0.121573	0.242768	0.229016	0.258363
		0.126362	0.115429	0.123787	0.259402	0.236762	0.2364
		0.12023	0.111482	0.128474	0.242957	0.262325	0.27237
		0.117921	0.117423	0.126313	0.25563	0.23569	0.250461
		0.122636	0.11646	0.122494	0.23035	0.229456	0.256346
		0.123748	0.1127	0.127314	0.243327	0.264252	0.244714
		0.11807	0.115075	0.120097	0.240876	0.222006	0.244221
		0.124967	0.116852	0.125608	0.249212	0.238591	0.226129
		0.130171	0.113762	0.122725	0.239611	0.241146	0.250067
		0.121613	0.116798	0.121999	0.247775	0.208261	0.24084
		0.126448	0.115166	0.122497	0.242259	0.232547	0.227022
		0.12393	0.119273	0.125029	0.221541	0.249022	0.255115
		0.121777	0.117293	0.120703	0.248993	0.238197	0.248001
		0.125799	0.11608	0.126738	0.288528	0.233755	0.244746
		0.118096	0.112204	0.129189	0.252083	0.225509	0.262916
		0.129423	0.112799	0.132213	0.267929	0.235776	0.240152
		0.12173	0.11207	0.12156	0.24704	0.24589	0.235911
		0.122638	0.114876	0.12471	0.255941	0.236291	0.225897
		0.122106	0.116955	0.133658	0.24013	0.219305	0.22353
		0.116394	0.116983	0.125751	0.281138	0.222339	0.22498
		0.130606	0.118036	0.127686	0.240561	0.22652	0.24081
		0.125724	0.116052	0.123326	0.244277	0.228379	0.242753
		0.118684	0.115784	0.130743	0.250689	0.216817	0.252398
		0.118592	0.117972	0.127981	0.244313	0.20569	0.23686
		0.128588	0.11574	0.129092	0.233518	0.224185	0.229285
		0.118241	0.115597	0.127135	0.234576	0.238408	0.237276
		0.119974	0.117819	0.122852	0.245122	0.234525	0.237361
		0.127248	0.114724	0.124304	0.240596	0.214089	0.232079
		0.119592	0.122635	0.12477	0.242091	0.2184	0.250761
		0.119638	0.117415	0.130531	0.259613	0.229677	0.228044
		0.120171	0.119116	0.12303	0.238928	0.23177	0.24821
		0.124397	0.113201	0.122145	0.256529	0.223718	0.236735
		0.125652	0.123981	0.124816	0.251827	0.226334	0.246084
		0.124161	0.118969	0.127051	0.259932	0.231025	0.239604
		0.120858	0.116817	0.119213	0.242114	0.239343	0.223436
		0.119637	0.115203	0.126903	0.250802	0.252565	0.224703
		0.12036	0.113797	0.122334	0.257047	0.221775	0.231816
		0.122172	0.119051	0.12204	0.251198	0.237216	0.24097
		0.117738	0.119068	0.12934	0.253399	0.234526	0.250916
		0.131278	0.114107	0.120478	0.224957	0.224577	0.217437
		0.117366	0.113772	0.125444	0.239826	0.244822	0.247578
		0.1122	0.115703	0.131215	0.248886	0.216466	0.25013
		0.121882	0.117565	0.128357	0.249967	0.210368	0.244619
		0.119159	0.114752	0.125674	0.274288	0.227322	0.233645
		0.120886	0.114052	0.118618	0.25941	0.247072	0.248226
		0.122053	0.116361	0.125653	0.247052	0.211894	0.237401
		0.121374	0.117127	0.123772	0.240047	0.233884	0.24026
		0.119687	0.119648	0.125366	0.233085	0.215218	0.249046
		0.118256	0.119067	0.123813	0.235629	0.230599	0.232225
		0.121901	0.115397	0.129549	0.252165	0.238952	0.238316
		0.120593	0.119581	0.122878	0.237373	0.211421	0.227494
		0.120912	0.114572	0.123842	0.242537	0.222183	0.250563
		0.121826	0.116088	0.120304	0.235545	0.246656	0.255803
		0.122494	0.115826	0.127003	0.24807	0.222701	0.221696
		0.119775	0.115271	0.125184	0.262236	0.226531	0.216
		0.126089	0.113761	0.124644	0.255813	0.23609	0.236923
		0.122172	0.113684	0.122074	0.229686	0.234932	0.216873
		0.118879	0.114471	0.130011	0.244609	0.227709	0.212125
		0.121457	0.109394	0.126915	0.238918	0.21271	0.231728
		0.128903	0.113448	0.131194	0.246423	0.246376	0.251801
		0.11983	0.114074	0.125938	0.242206	0.234493	0.240137
		0.127356	0.112656	0.122575	0.247905	0.217025	0.256886
		0.127741	0.11584	0.122117	0.256955	0.236941	0.247943
		0.122074	0.112424	0.121106	0.248894	0.229396	0.225895
		0.129518	0.116837	0.12804	0.260468	0.223325	0.22379
		0.128396	0.113967	0.130014	0.263792	0.237984	0.242689
		0.123793	0.120943	0.129163	0.2461	0.242012	0.255743
		0.120425	0.124824	0.13053	0.221083	0.264138	0.231245
		0.118515	0.117712	0.125008	0.264673	0.236384	0.219802
		0.121645	0.11252	0.124956	0.237023	0.269877	0.247208
		0.115049	0.11819	0.128639	0.248174	0.225939	0.235113
		0.122526	0.112675	0.130325	0.231709	0.237244	0.245153
		0.120922	0.116884	0.127041	0.236659	0.224945	0.246767
		0.12462	0.113376	0.124577	0.26718	0.234674	0.246143
		0.121933	0.11563	0.121028	0.235603	0.229454	0.266246
		0.124452	0.122445	0.122115	0.260909	0.237985	0.230386
		0.126687	0.116085	0.122137	0.238032	0.236607	0.238024
		0.126548	0.117555	0.122555	0.248837	0.212098	0.247456
		0.11654	0.113949	0.130349	0.248548	0.242179	0.216505
		0.125108	0.11116	0.121998	0.250352	0.229953	0.235442
		0.122902	0.114436	0.124722	0.230818	0.242663	0.256435
		0.118366	0.121595	0.12748	0.223049	0.217209	0.253843
		0.121366	0.108478	0.127542	0.240925	0.221724	0.236571
		0.114706	0.115892	0.134219	0.246773	0.214433	0.240267
		0.120254	0.109399	0.126418	0.282301	0.24284	0.238483
		0.118015	0.113351	0.123553	0.273584	0.220021	0.219061
		0.120663	0.11468	0.121394	0.233547	0.217486	0.239343
		0.120626	0.119214	0.123644	0.240542	0.225016	0.237548
		0.122204	0.120226	0.122713	0.289077	0.224392	0.230225
		0.12219	0.126012	0.125319	0.238107	0.222463	0.249695
		0.119862	0.114816	0.125046	0.238097	0.214801	0.247192
		0.12253	0.115262	0.121536	0.257525	0.225123	0.251541
		0.122896	0.113251	0.118853	0.265894	0.229747	0.23697
		0.119251	0.113919	0.121423	0.214598	0.228872	0.260835
		0.127844	0.113291	0.120697	0.258903	0.221107	0.220755
		0.118979	0.116821	0.123253	0.265089	0.241024	0.23712
		0.118041	0.121156	0.122252	0.251647	0.212649	0.259168
		0.12455	0.117826	0.125965	0.262243	0.233078	0.245686
		0.123192	0.11491	0.12424	0.247247	0.218645	0.244064
		0.130179	0.109956	0.119879	0.260447	0.220958	0.248154
		0.118203	0.115366	0.127916	0.248769	0.228246	0.239978
		0.120355	0.113738	0.121052	0.249939	0.223947	0.244422
		0.1242	0.11714	0.128668	0.270758	0.238875	0.251613
		0.123713	0.118333	0.122396	0.24677	0.23812	0.24784
		0.119692	0.113797	0.129976	0.242821	0.220266	0.235513
		0.12585	0.11668	0.126563	0.232969	0.217946	0.237535
		0.12581	0.109071	0.125145	0.258971	0.242002	0.228614
		0.128549	0.112926	0.119379	0.239155	0.259702	0.238156
		0.126711	0.121874	0.124385	0.233885	0.242458	0.230367
		0.130862	0.115114	0.124858	0.226895	0.231812	0.230765
		0.120514	0.120538	0.124771	0.224307	0.225677	0.246312
		0.121438	0.114151	0.126956	0.263857	0.216601	0.231802
		0.124818	0.120802	0.124183	0.235666	0.208407	0.246404
		0.129528	0.121989	0.124547	0.256147	0.221046	0.251499
		0.119101	0.115451	0.124605	0.239663	0.244804	0.232405
		0.128351	0.117639	0.129676	0.22545	0.247615	0.248459
		0.121399	0.114264	0.123134	0.269212	0.222391	0.240611
		0.124908	0.121565	0.119542	0.254633	0.221089	0.218577
		0.124102	0.119605	0.125732	0.248282	0.244102	0.261687
		0.121349	0.11335	0.12641	0.248253	0.219881	0.236204
		0.123935	0.114601	0.123192	0.252209	0.247524	0.249214
		0.121444	0.117243	0.129062	0.246163	0.229371	0.227271
		0.121637	0.114063	0.131628	0.250099	0.234144	0.258601
		0.124431	0.115441	0.122839	0.246424	0.233281	0.276137
		0.124638	0.115821	0.124186	0.235142	0.237058	0.235655
		0.125507	0.113318	0.129853	0.242927	0.212693	0.234117
		0.120309	0.118791	0.130287	0.251526	0.224563	0.253914
		0.121969	0.120877	0.124099	0.269738	0.215322	0.254786
		0.123738	0.114044	0.122901	0.226079	0.220558	0.245132
		0.126423	0.112554	0.134832	0.252571	0.217936	0.246865
		0.12864	0.113221	0.122142	0.23181	0.208248	0.241377
		0.127068	0.113059	0.125569	0.245376	0.251656	0.237426
		0.122661	0.119758	0.126337	0.254153	0.232049	0.231898
		0.124004	0.116239	0.125217	0.253892	0.225384	0.23159
		0.123501	0.122255	0.127945	0.260573	0.232261	0.229995
		0.121121	0.110521	0.12278	0.231113	0.222101	0.241809
		0.117857	0.11232	0.12354	0.276315	0.234831	0.251288
		0.12061	0.113858	0.122998	0.262468	0.253275	0.244585
		0.119917	0.116985	0.12063	0.240289	0.254175	0.244562
		0.129774	0.117753	0.122514	0.257581	0.234232	0.24811
		0.124022	0.117107	0.124968	0.24011	0.217524	0.227642
		0.121257	0.120794	0.131334	0.237848	0.229052	0.222794
		0.124862	0.109948	0.125136	0.267383	0.230876	0.239723
		0.13142	0.116085	0.122203	0.253244	0.231035	0.238305
		0.124695	0.117424	0.121252	0.250891	0.231568	0.235473
		0.125527	0.114829	0.129044	0.249472	0.2085	0.250833
		0.11932	0.126918	0.125517	0.279375	0.224323	0.227943
		0.120365	0.116549	0.126999	0.232827	0.225255	0.250246
		0.12557	0.113721	0.127152	0.24824	0.264786	0.227039
		0.124727	0.113778	0.125324	0.255836	0.224994	0.247659
		0.121773	0.12035	0.116745	0.240753	0.227306	0.246512
		0.127028	0.116005	0.125001	0.282033	0.246124	0.248756
		0.126942	0.113398	0.133242	0.274896	0.232127	0.248226
		0.120306	0.124173	0.122338	0.227442	0.224487	0.251306
		0.119656	0.118448	0.123826	0.269729	0.219362	0.24941
		0.124991	0.116353	0.126052	0.251086	0.225454	0.240682
		0.126908	0.117919	0.12559	0.244059	0.228216	0.236987
		0.125285	0.115223	0.122198	0.270517	0.203576	0.234196
		0.129492	0.116703	0.122979	0.238751	0.220892	0.255122
		0.122162	0.111034	0.128812	0.27339	0.229908	0.247309
		0.126576	0.112074	0.128398	0.240095	0.248992	0.247257
		0.122208	0.119003	0.122848	0.227145	0.219234	0.236153
		0.128617	0.114453	0.126223	0.253678	0.241368	0.233552
		0.120565	0.113937	0.12162	0.258722	0.226805	0.231128
		0.12571	0.118751	0.127209	0.248654	0.223597	0.244565
		0.121728	0.114798	0.128346	0.248143	0.219826	0.25257
		0.121542	0.116845	0.132477	0.245925	0.211545	0.249113
		0.119557	0.118539	0.121414	0.237042	0.223634	0.230117
		0.119227	0.112081	0.121708	0.259715	0.225069	0.248734
		0.121482	0.117459	0.131262	0.255019	0.228999	0.242308
		0.11948	0.11961	0.120607	0.250956	0.216574	0.230153
		0.123084	0.116205	0.132705	0.251773	0.255229	0.232338
		0.120506	0.11599	0.122252	0.231852	0.219354	0.259715
		0.1279	0.116941	0.127127	0.262601	0.248103	0.245806
		0.121228	0.113472	0.126411	0.266672	0.225556	0.246303
		0.125851	0.121684	0.125625	0.259706	0.237843	0.230393
		0.121662	0.119217	0.12887	0.232464	0.227358	0.229769
		0.122307	0.123947	0.125567	0.24208	0.237813	0.239886
		0.124407	0.118683	0.134858	0.244436	0.231013	0.244288
		0.123914	0.11012	0.121189	0.23759	0.236742	0.249386
		0.121664	0.116438	0.121663	0.251447	0.214676	0.22632
		0.134163	0.115238	0.121443	0.257655	0.233651	0.229097
		0.127783	0.117475	0.122823	0.259339	0.249004	0.230554
		0.118798	0.11864	0.124483	0.239094	0.249081	0.232507
		0.120097	0.113277	0.12075	0.254891	0.24258	0.240102
		0.123697	0.120787	0.122183
		0.120216	0.115017	0.126595
		0.127571	0.112747	0.121578
		0.124356	0.124767	0.123308
		0.128379	0.123963	0.130804
		0.122684	0.118897	0.129111
		0.121673	0.110218	0.129914
		0.117908	0.117751	0.123335
		0.123882	0.116608	0.133681
		0.121781	0.120124	0.120169
		0.121008	0.117527	0.129002
		0.114209	0.11284	0.1247
		0.124221	0.113107	0.123188
		0.120966	0.116164	0.124983
		0.122557	0.115839	0.125903
		0.121085	0.111803	0.125465
		0.117508	0.118244	0.127026
		0.120928	0.116368	0.123797
		0.128749	0.121236	0.122155
		0.129097	0.116457	0.119537
		0.122624	0.111516	0.128291
		0.118158	0.117562	0.117838
		0.123854	0.119335	0.127917
		0.123436	0.114482	0.122993
		0.126128	0.114831	0.121455
		0.123086	0.115357	0.122926
		0.119586	0.116061	0.119342
		0.117476	0.115802	0.121397
		0.11563	0.114186	0.121974
		0.131412	0.114863	0.125784
		0.118403	0.120308	0.122964
		0.123991	0.117683	0.121561
		0.12714	0.11632	0.124289
		0.126455	0.111554	0.123434
		0.120079	0.115873	0.12736
		0.124236	0.116332	0.125668
		0.12512	0.115936	0.123041
		0.118942	0.113557	0.121063
		0.125593	0.114033	0.124539
		0.121117	0.114632	0.122594
		0.123628	0.112312	0.130794
		0.118942	0.11697	0.124163
		0.121617	0.111412	0.127138
		0.121327	0.122706	0.127746
		0.124086	0.113548	0.124551
		0.12296	0.116262	0.122085
		0.117967	0.116317	0.124745
		0.11934	0.117145	0.123674
		0.116332	0.1179	0.121902
		0.120282	0.114201	0.120519
		0.118909	0.119366	0.126236
		0.118926	0.115107	0.124312
		0.118209	0.11828	0.132267
		0.124602	0.114487	0.126229

## Sheet: Fig6-S1G
	Null
		FWHM (ms)
		Pre-MIRS	MIRS	Post-MIRS
		0.117473	0.113835	0.116116
		0.149155	0.148988	0.149217
		0.129647	0.123184	0.129479
		0.160163	0.161806	0.160417
		0.2036	0.19483	0.197292
		0.181334	0.183172	0.181867
		0.112116	0.115901	0.122228
		0.122894	0.116829	0.125469
		0.125936	0.104019	0.115262
		0.163265	0.153255	0.160265
		0.125228	0.122072	0.128702
		0.146112	0.136376	0.143766
		0.177522	0.17706	0.178328
		0.126243	0.126478	0.126456
		0.0996788	0.0989466	0.0999006
		0.117559	0.117104	0.118414
		0.16048	0.156566	0.158537
		0.151874	0.155866	0.159582

## Sheet: Fig6-S1H
	Null
		Spike duration (ms)
		Pre-MIRS	MIRS	Post-MIRS
		0.188466	0.179668	0.185352
		0.257654	0.259735	0.254757
		0.232441	0.217836	0.246037
		0.297671	0.28693	0.2959
		0.292773	0.295565	0.290247
		0.331109	0.327964	0.327913
		0.194272	0.197964	0.218729
		0.244892	0.227793	0.239077
		0.197825	0.172074	0.187485
		0.278299	0.262869	0.282472
		0.236586	0.21099	0.244686
		0.236617	0.224865	0.236327
		0.248737	0.250086	0.250787
		0.151381	0.151925	0.152215
		0.116345	0.115876	0.11662
		0.139906	0.136654	0.137127
		0.201951	0.197618	0.198853
		0.154645	0.157993	0.160742
